# Supplementary material for: Biological characteristics of aging in human acute myeloid leukemia cells: the possible importance of aldehyde dehydrogenase, the cytoskeleton and altered transcriptional regulation
Source: Aging (Albany NY). 2020 Dec 20;12(24):24734–77. doi: 10.18632/aging.202361 (PMC7803495; doi:10.18632/aging.202361)
Supplement: Supplementary Figures [file aging-12-202361-s001.pdf]

## SUPPLEMENTARY FIGURES

**A**

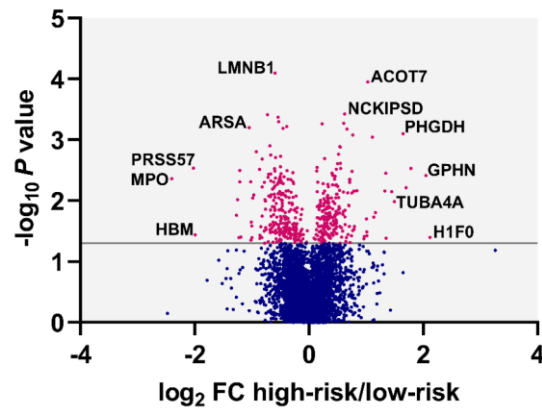

**B**

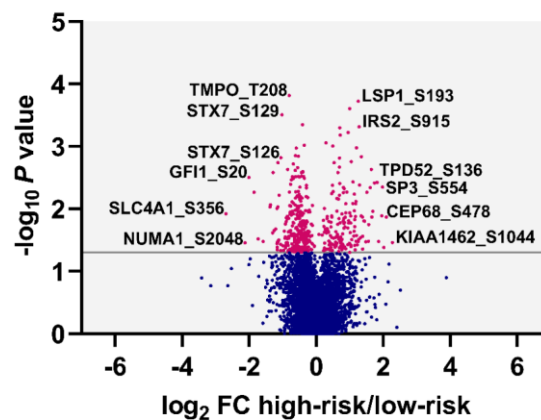

**Supplementary Figure 1. Volcano plot analyses of the data from the high-risk vs low-risk cohort.** Points (in magenta) above the non-axial horizontal grey line represent proteins or phosphosites with significantly different abundances or phosphorylation ( $P < 0.05$ ), respectively. **(A)** All proteins with at least 5 quantitative values in each group were used in the analysis. **(B)** All phosphosites with at least 5 quantitative values in each group were used in the analysis.

**A**

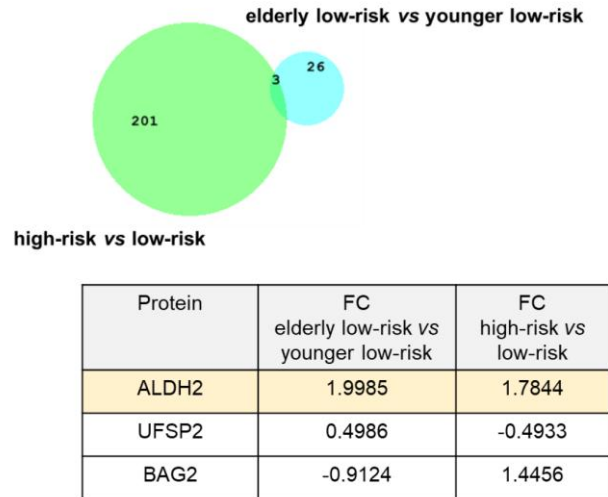

**B**

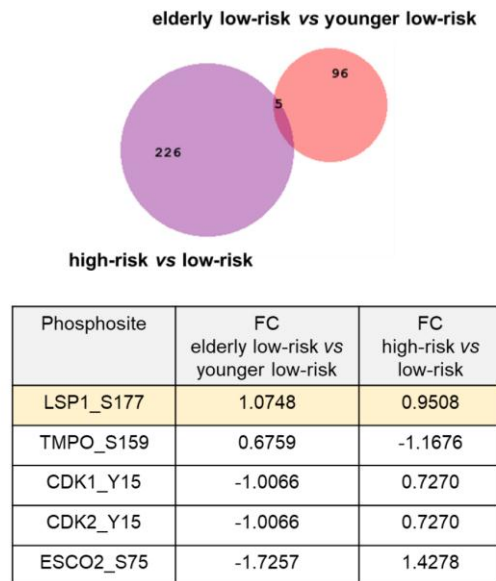

**Supplementary Figure 2. Venn diagrams of regulated proteins and phosphoproteins in the studies of elderly low-risk vs younger low-risk, and high-risk vs all low-risk patients. (A)** Overlap of 29 and 204 regulated proteins in the elderly low-risk vs younger low-risk, and high-risk vs low-risk studies, respectively, with table of the fold change (FC) values of overlapped proteins obtained in both studies. **(B)** Overlap of 101 and 231 unique differentially regulated phosphorylation sites in the elderly low-risk vs younger low-risk, and high-risk vs low-risk studies, respectively, with table of the FC values of overlapped phosphosites obtained in both studies.

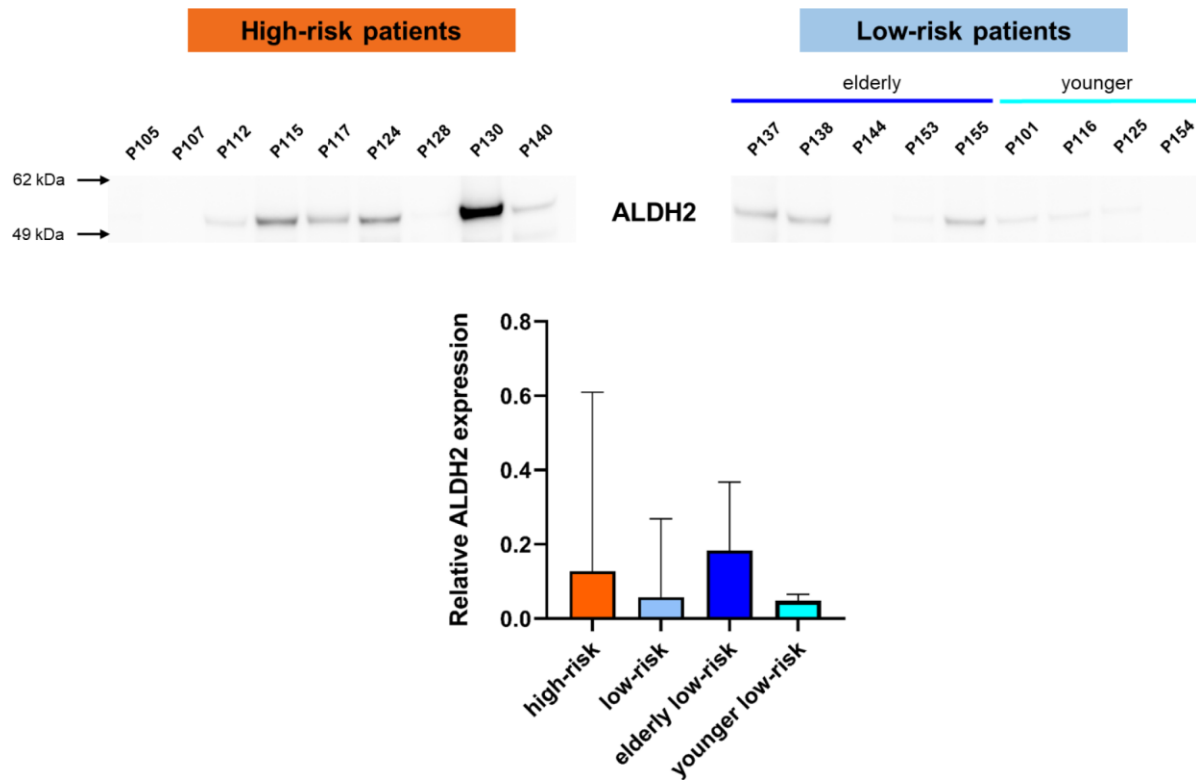

**Supplementary Figure 3. Western blots of sample lysates from nine high-risk and nine low-risk patients to study the activity of ALDH2.** Band intensities of ALDH2 protein were normalized before statistical analysis. Data from Western blot bands were expressed as the median  $\pm$  95% confidence interval in the bar plots. Band intensities from the high-risk and low-risk as well as from elderly low-risk and younger low-risk samples were compared using the Mann-Whitney test. None of the comparisons were statistically significant. Western blots were not replicated.

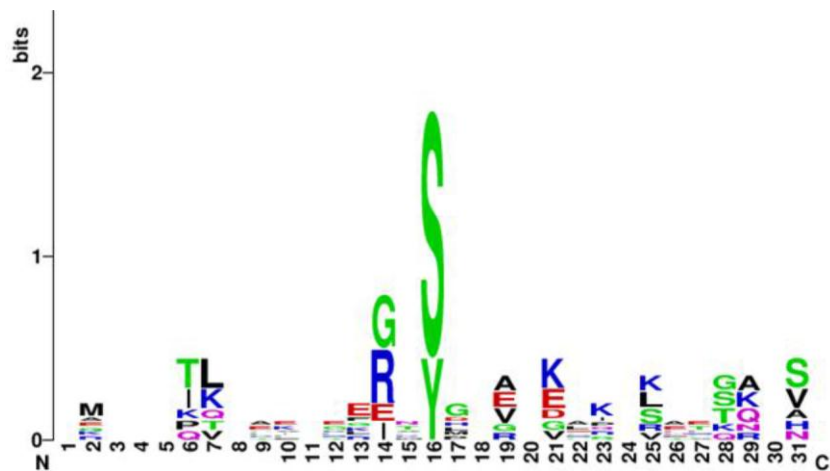

**Supplementary Figure 4. Sequence logo analysis of the phosphoprotein Cluster 1 showed in Figure 5C on the main text.** Thirty-one amino acid sequence windows surrounding the phosphorylation sites (located on position 16 on the x-axis) described in the protein cluster.

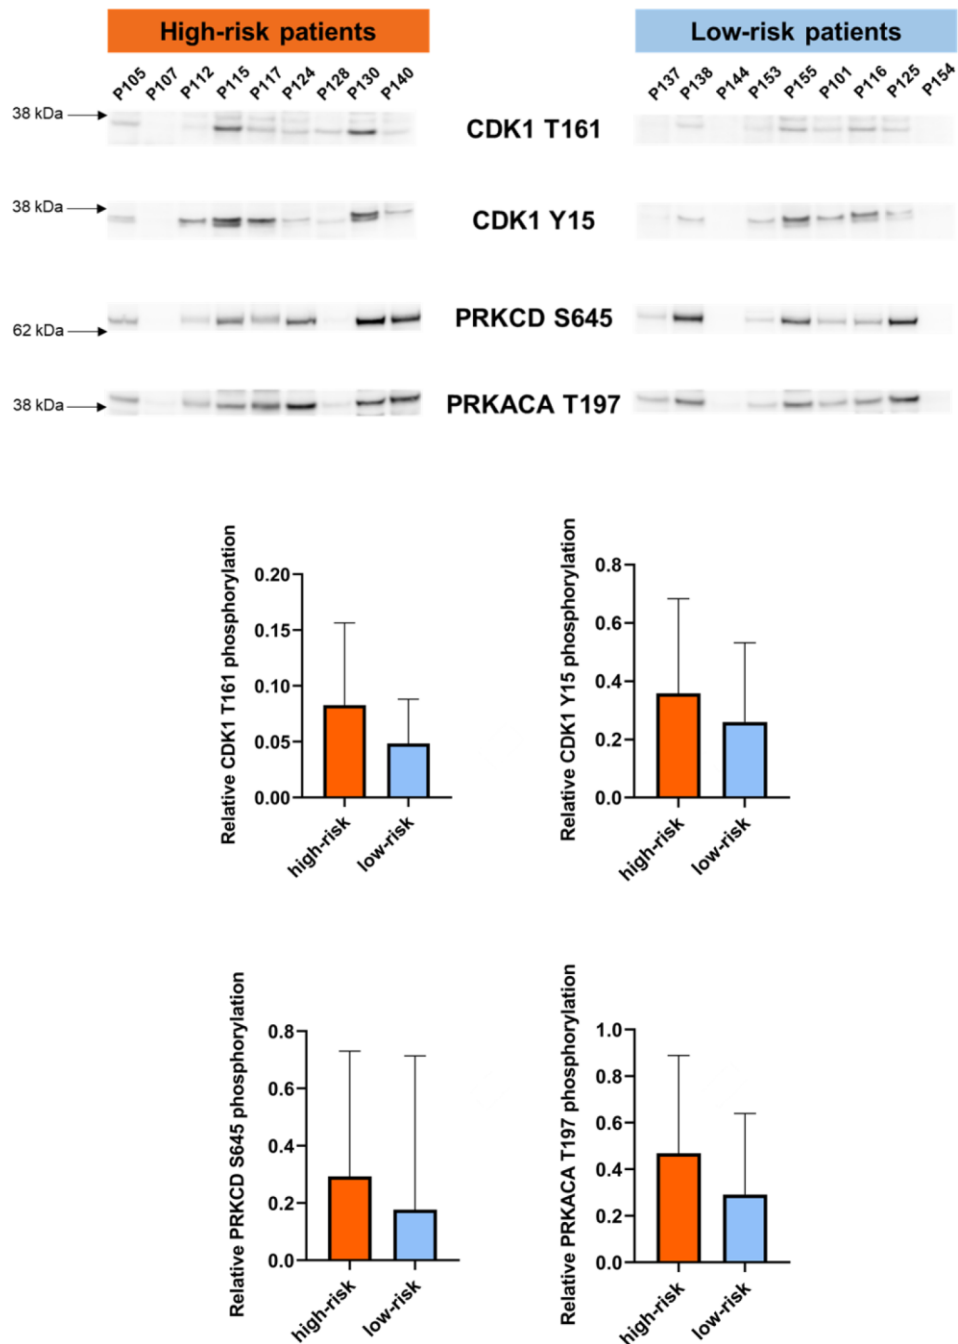

**Supplementary Figure 5. Western blots of sample lysates from nine high-risk and nine low-risk patients to study the activity of CDK1, PRKCD and PRKACA.** Band intensities of phosphorylated proteins were normalized before statistical analysis. Data from Western blot bands were expressed as the median  $\pm$  95% confidence interval in the bar plots. Band intensities from the high-risk and low-risk samples were compared using the Mann-Whitney test. None of the comparisons were statistically significant. Western blots were not replicated.
