# Supplementary material for: Biological characteristics of aging in human acute myeloid leukemia cells: the possible importance of aldehyde dehydrogenase, the cytoskeleton and altered transcriptional regulation
Source: Aging (Albany NY). 2020 Dec 20;12(24):24734–77. doi: 10.18632/aging.202361 (PMC7803495; doi:10.18632/aging.202361)
Supplement: Supplementary File 1 [file aging-12-202361-s008.xlsx]

## Sheet: Details
Supplementary File 1. Proteomic quantification of 18 low-risk patients.
MS proteomic data from nine elderly low-risk and nine younger low-risk patients
Datasheet "Proteome dataset 5 VV" contains the proteomics data after selecting 5 quantified valid values of each protein per group
Datasheet "29 regulated proteins" contains significantly different proteins after applying two variance t-test and Z-statistics

## Sheet: Proteome dataset 5 VV
YOUNGER	YOUNGER	YOUNGER	YOUNGER	YOUNGER	YOUNGER	YOUNGER	YOUNGER	YOUNGER	OLDER	OLDER	OLDER	OLDER	OLDER	OLDER	OLDER	OLDER	OLDER
P101	P116	P118	P125	P127	P131	P142	P143	P154	P155	P110	P120	P137	P138	P139	P141	P144	P153	p-value	Median younger	Median elderly	FC elderly/younger	Significance	GOBP name	GOMF name	GOCC name	GOBP slim name	GOCC slim name	KEGG name	Pfam	GSEA	Keywords	Corum	Peptides	Razor + unique peptides	Unique peptides	Sequence coverage [%]	Unique + razor sequence coverage [%]	Unique sequence coverage [%]	Mol. weight [kDa]	Q-value	Score	Intensity	Intensity L	Intensity H	Protein IDs	Majority protein IDs	Protein names	Gene names	id
-0.877874	0.283285	0.549297	0.507022	-0.375899	0.153827	0.530221	0.485856	-1.37282	0.147579	0.707856	-0.121782	-0.127526	0.158415	0.323449	0.275405	0.709722	-0.968962	0.646415	0.283285	0.158415	-0.124869	0.312573	catabolic process;cellular catabolic process;cellular macromolecule catabolic process;cellular macromolecule metabolic process;cellular metabolic process;cellular process;cellular protein metabolic process;macromolecule catabolic process;macromolecule metabolic process;macromolecule modification;metabolic process;modification-dependent macromolecule catabolic process;modification-dependent protei…	adenyl nucleotide binding;adenyl ribonucleotide binding;ATP binding;binding;catalytic activity;FAT10 activating enzyme activity;nucleotide binding;purine nucleotide binding;purine ribonucleoside triphosphate binding;purine ribonucleotide binding;ribonucleotide binding;small protein activating enzyme activity	cell part;cytoplasm;cytoplasmic part;cytosol;intracellular part	catabolic process;cellular metabolic process;cellular process;macromolecule metabolic process;macromolecule modification;metabolic process;primary metabolic process;protein metabolic process;protein modification by small protein conjugation or removal;protein modification process;proteolysis;proteolysis involved in cellular protein catabolic process	cell part;cytoplasm;cytosol	Ubiquitin mediated proteolysis	ThiF;UBA_e1_C;UBA_e1_thiolCys;UBACT	AACTGGA,MIR-145;AATGTGA,MIR-23A,MIR-23B;ACEVEDO_LIVER_CANCER_UP;BILANGES_SERUM_SENSITIVE_VIA_TSC2;CAGTATT,MIR-200B,MIR-200C,MIR-429;chr4q13;CYTOPLASM;ERB2_UP.V1_DN;GAUSSMANN_MLL_AF4_FUSION_TARGETS_G_UP;GGGCGGR_V$SP1_Q6;GGGYGTGNY_UNKNOWN;GREGORY_SYNTHETIC_LETHAL_WITH_IMATINIB;GSE12845_NAIVE_VS_DARKZONE_GC_TONSIL_BCELL_DN;GSE15659_CD45RA_NEG_CD4_TCELL_VS_ACTIVATED_TREG_DN;GSE15659_CD45RA_NEG_CD4_TC…	Acetylation;Alternativesplicing;ATP-binding;Completeproteome;Ligase;Nucleotide-binding;Polymorphism;Referenceproteome;Ublconjugationpathway		42	42	42	54.9	54.9	54.9	117.97	0	265.04	4485900000	2829500000	1656400000	A0AVT1;A0AVT1-2;A0AVT1-3;A0AVT1-4	A0AVT1;A0AVT1-2	Ubiquitin-like modifier-activating enzyme 6	UBA6	6
0.912469	1.21412	0.113532	0.206783	0.859845	0.639417	0.873758	0.160253	0.469237	0.222323	0.0732997	0.903063	0.487901	0.54589	0.0358121	-0.0136988	0.248932	0.836175	0.194101	0.639417	0.248932	-0.390485	0.0560761	cellular component organization;cellular component organization or biogenesis;cellular membrane organization;cellular process;endocytosis;establishment of localization;lipid transport;membrane invagination;membrane organization;organic substance transport;transport;vesicle-mediated transport	alcohol binding;amine binding;binding;calcium ion binding;calcium-dependent phospholipid binding;cation binding;identical protein binding;ion binding;lipid binding;metal ion binding;phosphatidylcholine binding;phosphatidylethanolamine binding;phosphatidylinositol binding;phospholipid binding;protein binding;quaternary ammonium group binding	cell part;cytoplasmic part;endoplasmic reticulum part;extrinsic to internal side of plasma membrane;extrinsic to membrane;extrinsic to plasma membrane;integral to membrane;integral to plasma membrane;intracellular organelle part;intracellular part;intrinsic to endoplasmic reticulum membrane;intrinsic to membrane;intrinsic to organelle membrane;intrinsic to plasma membrane;membrane;membrane part;o…	cellular component organization;cellular membrane organization;cellular process;endocytosis;establishment of localization;lipid transport;membrane invagination;membrane organization;transport;vesicle-mediated transport	cell part;membrane		C2	ACCAAAG,MIR-9;ATGCTGG,MIR-338;BROWN_MYELOID_CELL_DEVELOPMENT_UP;CATGTAA,MIR-496;CHARAFE_BREAST_CANCER_LUMINAL_VS_BASAL_DN;chr7q36;GABRIELY_MIR21_TARGETS;GRADE_COLON_CANCER_UP;GSE10239_KLRG1INT_VS_KLRG1HIGH_EFF_CD8_TCELL_DN;GSE10239_MEMORY_VS_KLRG1INT_EFF_CD8_TCELL_UP;GSE14350_TREG_VS_TEFF_IN_IL2RB_KO_UP;GSE2706_R848_VS_LPS_8H_STIM_DC_DN;GSE2706_R848_VS_R848_AND_LPS_8H_STIM_DC_DN;GSE27786_CD4_VS_C…	3D-structure;Alternativesplicing;Calcium;Cellmembrane;Completeproteome;Endocytosis;Endoplasmicreticulum;Lipid-binding;Lipidtransport;Membrane;Metal-binding;Phosphoprotein;Polymorphism;Referenceproteome;Repeat;Transmembrane;Transmembranehelix;Transport		50	49	2	61.8	61.8	4.1	98.9	0	323.31	20024000000	14272000000	5752100000	A0FGR8-2;A0FGR8;A0FGR8-4;A0FGR8-5	A0FGR8-2;A0FGR8;A0FGR8-4	Extended synaptotagmin-2	ESYT2	7
0.229934	0.029059	-0.192992	-0.0879727	-0.169194	-0.121264	0.287805	-0.449479	0.381212	-0.432594	-0.164942	0.659018	0.0343125	0.0117965	-0.553601	-0.512769	-0.502163	0.281708	0.477677	-0.0879727	-0.164942	-0.0769692	0.385834		binding;catalytic activity;cation binding;coenzyme binding;cofactor binding;ion binding;magnesium ion binding;metal ion binding;thiamine pyrophosphate binding;transferase activity;vitamin binding	cell part;integral to membrane;intrinsic to membrane;membrane;membrane part		cell part;membrane		TPP_enzyme_C;TPP_enzyme_M;TPP_enzyme_N	CASORELLI_ACUTE_PROMYELOCYTIC_LEUKEMIA_DN;CHANGOLKAR_H2AFY_TARGETS_UP;chr19p13;CHUNG_BLISTER_CYTOTOXICITY_UP;ELVIDGE_HIF1A_AND_HIF2A_TARGETS_DN;ELVIDGE_HIF1A_TARGETS_DN;ELVIDGE_HYPOXIA_BY_DMOG_UP;ELVIDGE_HYPOXIA_UP;GGGYGTGNY_UNKNOWN;GOLDRATH_NAIVE_VS_EFF_CD8_TCELL_UP;GOLDRATH_NAIVE_VS_MEMORY_CD8_TCELL_UP;GSE13306_TREG_VS_TCONV_LAMINA_PROPRIA_UP;GSE1448_CTRL_VS_ANTI_VBETA5_DP_THYMOCYTE_UP;GSE22886…	Completeproteome;Magnesium;Membrane;Metal-binding;Polymorphism;Referenceproteome;Thiaminepyrophosphate;Transferase;Transmembrane;Transmembranehelix		16	16	16	41.6	41.6	41.6	67.867	0	192.25	1893200000	1130000000	763190000	A1L0T0	A1L0T0	Acetolactate synthase-like protein	ILVBL	13
1.04383	0.862911	0.30281	0.274352	0.904767	0.865834	0.732295	-0.00640444	0.966788	0.606575	0.323502	0.832955	1.03001	0.939644	0.598138	1.09558	0.824474	0.934868	0.371027	0.862911	0.832955	-0.0299558	0.461962	biological regulation;catabolic process;cellular catabolic process;cellular macromolecule catabolic process;cellular macromolecule metabolic process;cellular metabolic process;cellular nitrogen compound metabolic process;cellular process;establishment of localization;establishment of localization in cell;Golgi vesicle transport;intracellular transport;macromolecule catabolic process;macromolecule…		cell part;cytoplasm;cytoplasmic part;Golgi apparatus;intracellular membrane-bounded organelle;intracellular non-membrane-bounded organelle;intracellular organelle;intracellular organelle part;intracellular part;membrane;membrane-bounded organelle;non-membrane-bounded organelle;nuclear membrane;nuclear part;nucleolus;organelle;organelle membrane;organelle part	biological regulation;catabolic process;cellular metabolic process;cellular nitrogen compound metabolic process;cellular process;establishment of localization;Golgi vesicle transport;macromolecule metabolic process;metabolic process;mRNA metabolic process;nitrogen compound metabolic process;nucleobase-containing compound metabolic process;primary metabolic process;RNA catabolic process;RNA metabo…	cell part;cytoplasm;Golgi apparatus;intracellular membrane-bounded organelle;intracellular non-membrane-bounded organelle;intracellular organelle;membrane;nucleolus;organelle		Nbas_N;Sec39	ACEVEDO_LIVER_CANCER_UP;BENPORATH_SOX2_TARGETS;BLALOCK_ALZHEIMERS_DISEASE_INCIPIENT_UP;BLALOCK_ALZHEIMERS_DISEASE_UP;BRUINS_UVC_RESPONSE_LATE;chr2p24;DACOSTA_UV_RESPONSE_VIA_ERCC3_DN;DIAZ_CHRONIC_MEYLOGENOUS_LEUKEMIA_UP;GARCIA_TARGETS_OF_FLI1_AND_DAX1_UP;GCM_BAG5;GSE13738_TCR_VS_BYSTANDER_ACTIVATED_CD4_TCELL_UP;GSE14769_20MIN_VS_360MIN_LPS_BMDM_DN;GSE14769_40MIN_VS_360MIN_LPS_BMDM_DN;GSE15750_WT_…	Acetylation;Alternativesplicing;Completeproteome;Cytoplasm;Diseasemutation;Dwarfism;Phosphoprotein;Polymorphism;Referenceproteome;Repeat;WDrepeat		40	40	40	23.7	23.7	23.7	268.57	0	270.16	1979300000	1422100000	557200000	A2RRP1;A2RRP1-2	A2RRP1;A2RRP1-2	Neuroblastoma-amplified sequence	NBAS	18
-0.398394	-0.442184	0.292532	0.405127	-0.686066	-0.348619	-1.23073	-0.48164	-0.144352	-1.39459	-0.748812	-0.277695	-1.17372	-0.208429	-0.677749	-0.381842	-1.10189	-0.615685	0.0861906	-0.398394	-0.677749	-0.279354	0.129585	biological regulation;catabolic process;cellular catabolic process;cellular macromolecule catabolic process;cellular macromolecule metabolic process;cellular metabolic process;cellular process;cellular protein catabolic process;cellular protein metabolic process;endosome to lysosome transport;endosome transport;establishment of localization;establishment of localization in cell;intracellular tran…	enzyme regulator activity;GTPase regulator activity;guanyl-nucleotide exchange factor activity;nucleoside-triphosphatase regulator activity;Rab guanyl-nucleotide exchange factor activity;Ras guanyl-nucleotide exchange factor activity;small GTPase regulator activity		biological regulation;catabolic process;cellular metabolic process;cellular process;endosome transport;establishment of localization;macromolecule metabolic process;metabolic process;primary metabolic process;protein catabolic process;protein metabolic process;transport;vacuolar transport;vesicle-mediated transport			dDENN;DENN;uDENN;WD40	ACEVEDO_METHYLATED_IN_LIVER_CANCER_DN;BENPORATH_EED_TARGETS;BORCZUK_MALIGNANT_MESOTHELIOMA_DN;BROWNE_HCMV_INFECTION_12HR_DN;BROWNE_HCMV_INFECTION_14HR_DN;BROWNE_HCMV_INFECTION_18HR_DN;CAGGTG_V$E12_Q6;chr8q24;GSE10325_CD4_TCELL_VS_BCELL_DN;GSE10325_CD4_TCELL_VS_MYELOID_DN;GSE10325_LUPUS_CD4_TCELL_VS_LUPUS_BCELL_DN;GSE11057_NAIVE_CD4_VS_PBMC_CD4_TCELL_DN;GSE12366_PLASMA_CELL_VS_MEMORY_BCELL_DN;GSE1…	Alternativesplicing;Completeproteome;Guanine-nucleotidereleasingfactor;Polymorphism;Referenceproteome;Repeat;WDrepeat		13	13	13	17.7	17.7	17.7	129.81	0	62.095	769110000	416510000	352600000	A2RUS2-2;A2RUS2;A2RUS2-3	A2RUS2-2;A2RUS2	DENN domain-containing protein 3	DENND3	23
0.524954	1.01039	0.507401	0.0357583	0.101085	0.605339	-0.0196967	0.0437707	0.0212259	-0.255761	-0.910416	0.876257	0.68335	0.469026	0.177971	0.557655	0.803549	0.607661	0.931773	0.101085	0.557655	0.456571	0.0294814		adenyl nucleotide binding;adenyl ribonucleotide binding;ATP binding;ATPase activity;binding;catalytic activity;hydrolase activity;hydrolase activity, acting on acid anhydrides;hydrolase activity, acting on acid anhydrides, in phosphorus-containing anhydrides;nucleoside-triphosphatase activity;nucleotide binding;purine nucleotide binding;purine ribonucleoside triphosphate binding;purine ribonucleo…	cell part;cytoplasmic part;extracellular region;intracellular membrane-bounded organelle;intracellular organelle;intracellular part;membrane-bounded organelle;mitochondrion;organelle		cell part;extracellular region;intracellular membrane-bounded organelle;intracellular organelle;mitochondrion;organelle		AAA_5		Alternativesplicing;ATP-binding;Completeproteome;Glycoprotein;Nucleotide-binding;Polymorphism;Referenceproteome;Secreted;Signal		18	18	18	12.6	12.6	12.6	210.92	0	84.544	524630000	357300000	167330000	A3KMH1-3;A3KMH1;A3KMH1-2	A3KMH1-3;A3KMH1;A3KMH1-2	von Willebrand factor A domain-containing protein 8	VWA8	24
-0.497062	-0.986452	-0.963295	-0.813972	-0.576869	-0.715679	-1.05881	-0.700318	-0.322533	-0.354906	-0.749472	-1.03978	-1.47503	-1.05161	-0.813231	-0.593833	-0.870186	-0.615863	0.458424	-0.715679	-0.813231	-0.0975518	0.353668	biological regulation;regulation of biological process;regulation of biosynthetic process;regulation of cellular biosynthetic process;regulation of cellular macromolecule biosynthetic process;regulation of cellular metabolic process;regulation of cellular process;regulation of gene expression;regulation of macromolecule biosynthetic process;regulation of macromolecule metabolic process;regulation…			biological regulation			Helicase_C_4	BUYTAERT_PHOTODYNAMIC_THERAPY_STRESS_UP;BYSTRYKH_HEMATOPOIESIS_STEM_CELL_AND_BRAIN_QTL_TRANS;chr12q24;DORSAM_HOXA9_TARGETS_DN;DOUGLAS_BMI1_TARGETS_UP;GSE12845_IGD_POS_BLOOD_VS_NAIVE_TONSIL_BCELL_DN;GSE13484_3H_UNSTIM_VS_YF17D_VACCINE_STIM_PBMC_DN;GSE14308_TH2_VS_NAIVE_CD4_TCELL_DN;GSE14769_20MIN_VS_360MIN_LPS_BMDM_DN;GSE17721_PAM3CSK4_VS_GADIQUIMOD_16H_BMDM_UP;GSE17721_POLYIC_VS_PAM3CSK4_4H_BMDM_…	Acetylation;Alternativesplicing;Coiledcoil;Completeproteome;Phosphoprotein;Polymorphism;Referenceproteome		19	19	19	19.6	19.6	19.6	154.06	0	63.457	660330000	315840000	344480000	A3KN83-3;A3KN83-2;A3KN83;A3KN83-4;Q9Y2G9-3;Q9Y2G9	A3KN83-3;A3KN83-2;A3KN83;A3KN83-4	Protein strawberry notch homolog 1	SBNO1	25
0.270883	0.0500875	0.641903	0.87123	-0.0572648	0.155771	1.60345	0.209215	-0.0826453	1.14609	0.0281741	0.846394	0.924513	0.964139	0.0807136	-0.84394	0.0779923	0.526677	0.972581	0.209215	0.526677	0.317462	0.093142							WD40	ACEVEDO_FGFR1_TARGETS_IN_PROSTATE_CANCER_MODEL_DN;ALCALAY_AML_BY_NPM1_LOCALIZATION_UP;CHEN_METABOLIC_SYNDROM_NETWORK;DCA_UP.V1_DN;DELACROIX_RAR_BOUND_ES;GSE11864_CSF1_VS_CSF1_PAM3CYS_IN_MAC_UP;GSE13411_IGM_MEMORY_BCELL_VS_PLASMA_CELL_UP;GSE13411_IGM_VS_SWITCHED_MEMORY_BCELL_DN;GSE13411_NAIVE_VS_IGM_MEMORY_BCELL_UP;GSE13485_DAY1_VS_DAY21_YF17D_VACCINE_PBMC_UP;GSE14308_TH1_VS_NAIVE_CD4_TCELL_UP;GSE…	Alternativesplicing;Coiledcoil;Completeproteome;Phosphoprotein;Polymorphism;Referenceproteome;Repeat;WDrepeat		23	23	23	35.9	35.9	35.9	83.343	0	76.101	1318400000	892730000	425720000	A4D1P6;A4D1P6-2;A4D1P6-3	A4D1P6;A4D1P6-2;A4D1P6-3	WD repeat-containing protein 91	WDR91	27
NaN	0.270257	0.353251	0.482881	NaN	-0.450925	NaN	NaN	0.28877	-0.438918	0.325687	NaN	-0.127216	NaN	-0.446791	-0.0278689	NaN	NaN	0.167467	0.28877	-0.127216	-0.415985	0.0451136							DUF974		Alternativesplicing;Completeproteome;Referenceproteome		4	4	4	13.9	13.9	13.9	45.934	0	30.93	246190000	151410000	94777000	A5PLN9-2;A5PLN9-4;A5PLN9;A5PLN9-5;A5PLN9-7	A5PLN9-2;A5PLN9-4;A5PLN9;A5PLN9-5;A5PLN9-7	Trafficking protein particle complex subunit 13	TRAPPC13	28
-0.24298	-0.700414	-0.435964	-0.464865	-0.162608	-0.359095	-0.419199	-0.361876	-0.411348	-0.0925683	-0.479582	-0.478139	-0.242775	-0.0563677	-0.291747	-0.131833	-0.260518	-0.105745	0.0460635	-0.411348	-0.242775	0.168573	0.23731	biological regulation;biosynthetic process;catabolic process;cellular biosynthetic process;cellular catabolic process;cellular macromolecule biosynthetic process;cellular macromolecule catabolic process;cellular macromolecule metabolic process;cellular metabolic process;cellular nitrogen compound metabolic process;cellular process;developmental process;gene expression;gene silencing;gene silencin…	armadillo repeat domain binding;binding;estrogen receptor binding;hormone receptor binding;nuclear hormone receptor binding;protein binding;protein complex scaffold;protein domain specific binding;receptor binding;retinoic acid receptor binding;steroid hormone receptor binding;structural molecule activity;transcription factor binding	CCR4-NOT complex;cell part;cytoplasmic mRNA processing body;cytoplasmic part;cytosol;extracellular region part;extracellular space;intracellular membrane-bounded organelle;intracellular non-membrane-bounded organelle;intracellular organelle;intracellular organelle part;intracellular part;macromolecular complex;membrane;membrane-bounded organelle;microbody;microbody membrane;microbody part;non-mem…	biological regulation;biosynthetic process;catabolic process;cellular metabolic process;cellular nitrogen compound metabolic process;cellular process;developmental process;gene silencing;macromolecule metabolic process;metabolic process;mRNA metabolic process;mRNA processing;multicellular organismal development;multicellular organismal process;nitrogen compound metabolic process;nucleobase-contai…	cell part;cytosol;extracellular space;intracellular membrane-bounded organelle;intracellular non-membrane-bounded organelle;intracellular organelle;macromolecular complex;membrane;microbody;nucleoplasm;organelle;protein complex;ribonucleoprotein complex;transcription factor complex	RNA degradation	DUF3819;Not1	CCCNNNNNNAAGWT_UNKNOWN;chr16q21;GATTGGY_V$NFY_Q6_01;GCCATNTTG_V$YY1_Q6;GCGSCMNTTT_UNKNOWN;GGGAGGRR_V$MAZ_Q6;GGGCGGR_V$SP1_Q6;GNF2_MLH1;GRAESSMANN_APOPTOSIS_BY_DOXORUBICIN_DN;GSE13493_DP_VS_CD8POS_THYMOCYTE_UP;GSE17974_0.5H_VS_72H_IL4_AND_ANTI_IL12_ACT_CD4_TCELL_DN;GSE17974_0H_VS_4H_IN_VITRO_ACT_CD4_TCELL_DN;GSE17974_1.5H_VS_72H_IL4_AND_ANTI_IL12_ACT_CD4_TCELL_DN;GSE17974_CTRL_VS_ACT_IL4_AND_ANTI_…	3D-structure;Alternativesplicing;Completeproteome;Cytoplasm;Developmentalprotein;Nucleus;Polymorphism;Referenceproteome;Repressor;RNA-mediatedgenesilencing;Transcription;Transcriptionregulation;Translationregulation		65	65	65	35.6	35.6	35.6	266.94	0	323.31	7151200000	3873500000	3277700000	A5YKK6;A5YKK6-2;A5YKK6-3;A5YKK6-4	A5YKK6;A5YKK6-2;A5YKK6-3;A5YKK6-4	CCR4-NOT transcription complex subunit 1	CNOT1	29
-0.240066	0.586753	0.36522	1.41677	-0.871184	0.248111	NaN	1.00206	0.544308	0.125845	0.57169	0.593065	-0.076603	1.09453	1.31465	0.0787915	0.0174013	0.570517	0.755198	0.454764	0.570517	0.115753	0.308623			cell part;membrane		cell part;membrane		HOOK	AGCGCAG,MIR-191;AGGGCAG,MIR-18A;CAGGTG_V$E12_Q6;chr11q13;CTGAGCC,MIR-24;GAGCCAG,MIR-149;GAGCTGG,MIR-337;GGCAGAC,MIR-346;GGCAGCT,MIR-22;GGGGCCC,MIR-296;GGTGAAG,MIR-412;GSE10239_MEMORY_VS_DAY4.5_EFF_CD8_TCELL_UP;GSE10239_NAIVE_VS_DAY4.5_EFF_CD8_TCELL_UP;GSE11924_TFH_VS_TH2_CD4_TCELL_UP;GSE13229_IMM_VS_INTMATURE_NKCELL_DN;GSE13229_IMM_VS_MATURE_NKCELL_DN;GSE14308_TH17_VS_INDUCED_TREG_DN;GSE14308_TH2…	Alternativesplicing;Coiledcoil;Completeproteome;Phosphoprotein;Polymorphism;Referenceproteome		24	24	12	19.4	19.4	8.3	164.81	0	189.09	487020000	335390000	151630000	A6NC98;A6NC98-4;A6NC98-5;A6NC98-6	A6NC98;A6NC98-4	Coiled-coil domain-containing protein 88B	CCDC88B	30
NaN	-1.8139	-0.615129	-0.765706	-2.30992	-1.72634	-1.40982	-1.04121	-1.76701	-1.14365	-1.14886	-0.914154	-1.52505	-1.25246	-0.994473	-2.00881	-0.925894	-2.21985	0.754483	-1.56808	-1.14886	0.419227	0.0412548	carbohydrate metabolic process;cellular macromolecule metabolic process;cellular metabolic process;cellular process;cellular protein metabolic process;dephosphorylation;macromolecule metabolic process;macromolecule modification;metabolic process;peptidyl-tyrosine dephosphorylation;phosphate-containing compound metabolic process;phosphorus metabolic process;primary metabolic process;protein dephos…	binding;catalytic activity;cation binding;hydrolase activity;hydrolase activity, acting on ester bonds;ion binding;magnesium ion binding;metal ion binding;phosphatase activity;phosphoglycolate phosphatase activity;phosphoprotein phosphatase activity;phosphoric ester hydrolase activity;protein tyrosine phosphatase activity		carbohydrate metabolic process;cellular metabolic process;cellular process;macromolecule metabolic process;macromolecule modification;metabolic process;phosphorus metabolic process;primary metabolic process;protein dephosphorylation;protein metabolic process;protein modification process		Glyoxylate and dicarboxylate metabolism	Hydrolase_6	BRUINS_UVC_RESPONSE_LATE;BURTON_ADIPOGENESIS_PEAK_AT_16HR;BUYTAERT_PHOTODYNAMIC_THERAPY_STRESS_DN;CHANDRAN_METASTASIS_UP;chr16p13;GSE10239_KLRG1INT_VS_KLRG1HIGH_EFF_CD8_TCELL_UP;GSE11864_UNTREATED_VS_CSF1_IFNG_PAM3CYS_IN_MAC_UP;GSE13306_LAMINA_PROPRIA_VS_SPLEEN_TREG_DN;GSE14769_UNSTIM_VS_60MIN_LPS_BMDM_UP;GSE15324_NAIVE_VS_ACTIVATED_ELF4_KO_CD8_TCELL_DN;GSE17580_UNINFECTED_VS_S_MANSONI_INF_TREG_D…	Carbohydratemetabolism;Completeproteome;Hydrolase;Magnesium;Metal-binding;Proteinphosphatase;Referenceproteome		13	13	13	63.9	63.9	63.9	34.006	0	46.016	1503400000	602210000	901190000	A6NDG6	A6NDG6	Phosphoglycolate phosphatase	PGP	35
-0.979195	-0.67692	-0.36913	0.367426	-0.797708	-1.12237	0.943628	-0.39598	NaN	-0.0263483	-0.00434576	-0.678364	-1.08422	-0.848172	0.547434	-0.655517	0.922478	-1.53334	0.988332	-0.53645	-0.655517	-0.119068	0.32113									Acetylation;Completeproteome;Polymorphism;Referenceproteome		6	6	6	40.5	40.5	40.5	33.62	0	70.301	626650000	427500000	199150000	A6NDU8	A6NDU8	UPF0600 protein C5orf51	C5orf51	36
0.562299	0.486427	-0.441511	-0.640702	-0.264054	-0.00696652	1.23634	0.387299	0.283643	1.2567	-0.715438	0.162077	0.440847	0.446119	-0.315281	0.338049	-0.554031	0.31564	0.928868	0.283643	0.31564	0.0319962	0.43704	cellular macromolecule metabolic process;cellular metabolic process;cellular nitrogen compound metabolic process;cellular process;macromolecule metabolic process;metabolic process;ncRNA metabolic process;ncRNA processing;nitrogen compound metabolic process;nucleic acid metabolic process;nucleobase-containing compound metabolic process;primary metabolic process;RNA metabolic process;RNA processing…	binding;catalytic activity;methyltransferase activity;nucleic acid binding;RNA binding;transferase activity;transferase activity, transferring one-carbon groups	cell part;intracellular non-membrane-bounded organelle;intracellular organelle;intracellular organelle part;intracellular part;macromolecular complex;non-membrane-bounded organelle;nuclear part;nucleolus;organelle;organelle part;ribonucleoprotein complex	cellular metabolic process;cellular nitrogen compound metabolic process;cellular process;macromolecule metabolic process;metabolic process;nitrogen compound metabolic process;nucleobase-containing compound metabolic process;primary metabolic process;RNA metabolic process;RNA processing;rRNA processing;tRNA metabolic process;tRNA processing	cell part;intracellular non-membrane-bounded organelle;intracellular organelle;macromolecular complex;nucleolus;organelle;ribonucleoprotein complex		Fibrillarin	chr5q35;MEISSNER_NPC_HCP_WITH_H3K4ME2_AND_H3K27ME3;MIKKELSEN_MCV6_HCP_WITH_H3K27ME3;MIKKELSEN_MEF_HCP_WITH_H3K27ME3;MIKKELSEN_NPC_HCP_WITH_H3K27ME3	Completeproteome;Methyltransferase;Nucleus;Referenceproteome;Ribonucleoprotein;RNA-binding;rRNAprocessing;S-adenosyl-L-methionine;Transferase		2	1	1	6.6	3.3	3.3	34.803	0.0012826	3.3792	3066400000	2131100000	935270000	A6NHQ2	A6NHQ2	rRNA/tRNA 2-O-methyltransferase fibrillarin-like protein 1	FBLL1	40
0.967884	1.00227	0.276146	0.253532	0.791795	1.41243	1.19993	0.830359	1.67021	0.44936	0.795548	0.876317	0.620622	0.48086	0.590543	0.784737	0.746357	0.976273	0.19715	0.967884	0.746357	-0.221527	0.187037	biological regulation;cellular component organization;cellular component organization at cellular level;cellular component organization or biogenesis;cellular component organization or biogenesis at cellular level;cellular process;chromosome organization;dosage compensation;dosage compensation, by inactivation of X chromosome;inactivation of X chromosome by DNA methylation;organelle organization;…	adenyl nucleotide binding;adenyl ribonucleotide binding;ATP binding;binding;nucleotide binding;purine nucleotide binding;purine ribonucleoside triphosphate binding;purine ribonucleotide binding;ribonucleotide binding	Barr body;cell part;chromosome;intracellular non-membrane-bounded organelle;intracellular organelle;intracellular organelle part;intracellular part;non-membrane-bounded organelle;nuclear chromosome;nuclear part;organelle;organelle part;sex chromosome;X chromosome	biological regulation;cellular component organization;cellular process;chromosome organization;organelle organization;regulation of gene expression, epigenetic	cell part;chromosome;intracellular non-membrane-bounded organelle;intracellular organelle;nuclear chromosome;organelle		SMC_hinge	BASAKI_YBX1_TARGETS_DN;CHARAFE_BREAST_CANCER_LUMINAL_VS_BASAL_DN;CHEN_HOXA5_TARGETS_9HR_UP;CHEOK_RESPONSE_TO_MERCAPTOPURINE_AND_HD_MTX_DN;chr18p11;CUI_TCF21_TARGETS_2_UP;DACOSTA_UV_RESPONSE_VIA_ERCC3_COMMON_DN;DACOSTA_UV_RESPONSE_VIA_ERCC3_DN;GSE12845_IGD_NEG_BLOOD_VS_NAIVE_TONSIL_BCELL_UP;GSE13484_UNSTIM_VS_YF17D_VACCINE_STIM_PBMC_DN;GSE13493_CD4INTCD8POS_VS_CD8POS_THYMOCYTE_DN;GSE1432_CTRL_VS_I…	Acetylation;Alternativesplicing;Chromosome;Completeproteome;Directproteinsequencing;Diseasemutation;Polymorphism;Referenceproteome;Ublconjugation		88	88	87	53.7	53.7	53.4	226.37	0	323.31	14384000000	7818700000	6565400000	A6NHR9;A6NHR9-2;A6NHR9-3	A6NHR9;A6NHR9-2	Structural maintenance of chromosomes flexible hinge domain-containing protein 1	SMCHD1	41
NaN	NaN	-0.0946492	0.112568	NaN	0.839802	NaN	0.741186	0.537835	0.729836	NaN	0.40573	0.779197	NaN	0.259213	1.17042	1.24154	0.327983	0.272884	0.537835	0.729836	0.192001	0.208843	cellular process;establishment of localization;establishment of localization in cell;establishment of protein localization;establishment of protein localization in Golgi;establishment of protein localization to organelle;Golgi vesicle transport;intracellular protein transport;intracellular transport;intra-Golgi vesicle-mediated transport;protein targeting;protein targeting to Golgi;protein transp…			cellular process;establishment of localization;Golgi vesicle transport;protein targeting;protein transport;transport;vesicle-mediated transport			GRIP;Ran_BP1;TPR_1	chr2q12	Coiledcoil;Completeproteome;Phosphoprotein;Referenceproteome;Repeat;TPRrepeat		45	3	0	24.7	2	0	197.48	0.00014537	3.9418	545790000	377290000	168510000	A6NKT7	A6NKT7	RanBP2-like and GRIP domain-containing protein 3	RGPD3	48
0.100861	0.173784	-0.473785	-0.430761	0.122375	0.188336	0.567482	0.0597792	0.369135	0.32307	-0.0271115	-0.0817694	0.0483067	-0.163792	-0.096723	0.0686401	0.11049	0.210768	0.802753	0.122375	0.0483067	-0.074068	0.390437	biosynthetic process;cellular biosynthetic process;cellular component assembly;cellular component assembly at cellular level;cellular component organization;cellular component organization at cellular level;cellular component organization or biogenesis;cellular component organization or biogenesis at cellular level;cellular macromolecular complex assembly;cellular macromolecular complex subunit o…	binding;nucleic acid binding;RNA binding	catalytic step 2 spliceosome;cell part;cytoplasmic part;cytosol;intracellular organelle part;intracellular part;macromolecular complex;methylosome;methyltransferase complex;nuclear part;nucleoplasm;organelle part;protein complex;ribonucleoprotein complex;small nuclear ribonucleoprotein complex;small nucleolar ribonucleoprotein complex;SMN-Sm protein complex;spliceosomal complex;U1 snRNP;U12-type …	biosynthetic process;cellular component assembly;cellular component organization;cellular macromolecular complex assembly;cellular metabolic process;cellular nitrogen compound metabolic process;cellular process;macromolecular complex assembly;macromolecule metabolic process;metabolic process;mRNA metabolic process;mRNA processing;nitrogen compound metabolic process;nucleobase-containing compound …	cell part;cytosol;macromolecular complex;nucleoplasm;protein complex;ribonucleoprotein complex;small nuclear ribonucleoprotein complex;small nucleolar ribonucleoprotein complex;spliceosomal complex	Spliceosome	LSM	AMUNDSON_POOR_SURVIVAL_AFTER_GAMMA_RADIATION_2G;BENPORATH_PROLIFERATION;BIOPOLYMER_METABOLIC_PROCESS;CHICAS_RB1_TARGETS_LOW_SERUM;chr2p12;CONCANNON_APOPTOSIS_BY_EPOXOMICIN_DN;DIAZ_CHRONIC_MEYLOGENOUS_LEUKEMIA_UP;DODD_NASOPHARYNGEAL_CARCINOMA_DN;ENK_UV_RESPONSE_KERATINOCYTE_DN;FONTAINE_PAPILLARY_THYROID_CARCINOMA_UP;FONTAINE_THYROID_TUMOR_UNCERTAIN_MALIGNANCY_UP;GNF2_BUB3;GNF2_HAT1;GNF2_MCM5;GNF2_…	3D-structure;Completeproteome;Cytoplasm;mRNAprocessing;mRNAsplicing;Nucleus;Referenceproteome;Ribonucleoprotein;RNA-binding;Spliceosome	(E.F.G) complex;12S U11 snRNP;17S U2 snRNP;18S U11/U12 snRNP;6S methyltransferase and RG-containing Sm proteins complex;C complex spliceosome;SMN complex;SMN complex, U7 snRNA specific;Spliceosome	5	5	5	36.8	36.8	36.8	8.496	0	19.793	6040000000	3794300000	2245700000	P62308;A8MWD9	P62308;A8MWD9	Small nuclear ribonucleoprotein G;Putative small nuclear ribonucleoprotein G-like protein 15	SNRPG;SNRPGP15	58
-0.503729	-0.500338	-0.588972	-0.220028	0.817934	0.655298	-0.844567	-0.275151	0.635251	-0.679144	0.235865	-0.108163	0.694643	-0.163649	-0.20886	-0.0393916	0.965083	0.34299	0.44958	-0.275151	-0.0393916	0.235759	0.161395		binding;catalytic activity;cation binding;hydrolase activity;ion binding;metal ion binding;protein binding;receptor binding	cell part;cytoplasmic part;intracellular membrane-bounded organelle;intracellular organelle;intracellular part;membrane-bounded organelle;microbody;mitochondrion;organelle;peroxisome		cell part;intracellular membrane-bounded organelle;intracellular organelle;microbody;mitochondrion;organelle;peroxisome	Peroxisome	NUDIX	CHESLER_BRAIN_QTL_CIS;chr19q13;GOLDRATH_HOMEOSTATIC_PROLIFERATION;GSE10239_KLRG1INT_VS_KLRG1HIGH_EFF_CD8_TCELL_UP;GSE13485_CTRL_VS_DAY1_YF17D_VACCINE_PBMC_UP;GSE15930_NAIVE_VS_24H_IN_VITRO_STIM_CD8_TCELL_DN;GSE17721_LPS_VS_CPG_16H_BMDM_UP;GSE17721_LPS_VS_CPG_24H_BMDM_UP;GSE17721_LPS_VS_CPG_8H_BMDM_UP;GSE17721_LPS_VS_GARDIQUIMOD_8H_BMDM_UP;GSE17721_PAM3CSK4_VS_CPG_1H_BMDM_UP;GSE17974_CTRL_VS_ACT_I…	Completeproteome;Hydrolase;Magnesium;Manganese;Metal-binding;Mitochondrion;Peroxisome;Polymorphism;Referenceproteome;Transitpeptide		8	8	8	33.9	33.9	33.9	42.233	0	37.444	993950000	609510000	384440000	A8MXV4	A8MXV4	Nucleoside diphosphate-linked moiety X motif 19, mitochondrial	NUDT19	59
0.00153699	0.0523416	0.227628	0.510003	-0.654427	-0.0959522	0.770914	0.289058	0.348576	-0.897022	0.233194	0.198761	-0.36375	0.0924903	0.0595915	0.147522	0.434355	0.289947	0.478061	0.227628	0.147522	-0.0801059	0.380874	adaptive immune response;adaptive immune response based on somatic recombination of immune receptors built from immunoglobulin superfamily domains;biological adhesion;cell adhesion;cell gliding;cell migration;cell motility;cell-substrate adhesion;cellular component movement;cellular process;establishment of localization;establishment of localization in cell;exocytosis;immune effector process;immu…	adenyl nucleotide binding;adenyl ribonucleotide binding;ATP binding;binding;catalytic activity;hydrolase activity;hydrolase activity, acting on acid anhydrides;hydrolase activity, acting on acid anhydrides, in phosphorus-containing anhydrides;lipid binding;motor activity;nucleoside-triphosphatase activity;nucleotide binding;phosphatidylinositol binding;phosphatidylinositol-3,4,5-trisphosphate bin…	cell part;cell projection;cytoskeletal part;extracellular membrane-bounded organelle;extracellular organelle;extracellular region part;extracellular vesicular exosome;filopodium;intracellular organelle part;intracellular part;lamellipodium;leading edge membrane;macromolecular complex;membrane;membrane part;membrane-bounded organelle;membrane-bounded vesicle;microvillus;myosin complex;organelle;or…	biological adhesion;cell adhesion;cell motility;cellular component movement;cellular process;establishment of localization;exocytosis;immune system process;locomotion;response to stimulus;secretion;transport;vesicle-mediated transport	cell part;cell projection;extracellular organelle;filopodium;macromolecular complex;membrane;microvillus;organelle;plasma membrane;protein complex;vesicle		Myosin_head;Myosin_TH1	AKT_UP_MTOR_DN.V1_DN;BOSCO_INTERFERON_INDUCED_ANTIVIRAL_MODULE;chr7p13;FULCHER_INFLAMMATORY_RESPONSE_LECTIN_VS_LPS_DN;GOBERT_OLIGODENDROCYTE_DIFFERENTIATION_DN;GSE13306_RA_VS_UNTREATED_MEM_CD4_TCELL_DN;GSE17974_0H_VS_12H_IN_VITRO_ACT_CD4_TCELL_UP;GSE17974_0H_VS_4H_IN_VITRO_ACT_CD4_TCELL_UP;GSE17974_0H_VS_6H_IN_VITRO_ACT_CD4_TCELL_UP;GSE17974_CTRL_VS_ACT_IL4_AND_ANTI_IL12_12H_CD4_TCELL_UP;GSE17974…	Actin-binding;Adaptiveimmunity;Alternativesplicing;ATP-binding;Calmodulin-binding;Cellmembrane;Cellprojection;Completeproteome;Directproteinsequencing;Immunity;Lipid-binding;Membrane;Motorprotein;Myosin;Nucleotide-binding;Polymorphism;Referenceproteome		57	57	56	70.7	70.7	70.2	116.44	0	323.31	32669000000	20981000000	11688000000	B0I1T2;B0I1T2-4;B0I1T2-3;B0I1T2-2	B0I1T2;B0I1T2-4	Unconventional myosin-Ig;Minor histocompatibility antigen HA-2	MYO1G	61
1.33754	1.52986	-0.442162	0.495096	1.14681	1.12678	1.44155	1.10142	1.68465	0.402262	1.37832	1.14732	0.749902	1.22598	0.596745	1.75754	0.228764	1.27049	0.792247	1.14681	1.14732	0.000510573	0.487959	biological regulation;positive regulation of catalytic activity;positive regulation of GTPase activity;positive regulation of hydrolase activity;positive regulation of molecular function;regulation of biological process;regulation of catabolic process;regulation of catalytic activity;regulation of cellular catabolic process;regulation of cellular metabolic process;regulation of cellular process;r…	binding;enzyme activator activity;enzyme binding;enzyme regulator activity;GTPase activator activity;GTPase binding;GTPase regulator activity;nucleoside-triphosphatase regulator activity;protein binding;Rab GTPase binding;Ras GTPase binding;small GTPase binding	cell part;cytoplasmic part;early endosome;endosome;Golgi apparatus;intracellular membrane-bounded organelle;intracellular organelle;intracellular part;membrane-bounded organelle;nucleus;organelle	biological regulation	cell part;endosome;Golgi apparatus;intracellular membrane-bounded organelle;intracellular organelle;nucleus;organelle		DUF3694;PID;RabGAP-TBC	BACOLOD_RESISTANCE_TO_ALKYLATING_AGENTS_UP;BAELDE_DIABETIC_NEPHROPATHY_DN;BENPORATH_ES_1;BIDUS_METASTASIS_UP;BOQUEST_STEM_CELL_CULTURED_VS_FRESH_UP;BROWNE_HCMV_INFECTION_12HR_DN;BROWNE_HCMV_INFECTION_20HR_DN;BROWNE_HCMV_INFECTION_20HR_UP;BROWNE_HCMV_INFECTION_30MIN_DN;BROWNE_HCMV_INFECTION_4HR_DN;BROWNE_INTERFERON_RESPONSIVE_GENES;BRUINS_UVC_RESPONSE_VIA_TP53_GROUP_C;CHEN_LIVER_METABOLISM_QTL_CIS…	3D-structure;Alternativesplicing;Coiledcoil;Completeproteome;GTPaseactivation;Phosphoprotein;Polymorphism;Referenceproteome;Ribosomalframeshifting		2	1	1	10.3	4	4	29.038	0.0016844	3.004	1254500000	961430000	293120000	B7ZAP0;Q5R372-7;Q5R372-8;Q5R372-6;Q5R372-5	B7ZAP0;Q5R372-7;Q5R372-8;Q5R372-6;Q5R372-5	Rab GTPase-activating protein 1-like, isoform 10;Rab GTPase-activating protein 1-like	RABGAP1L	65
0.309668	0.289239	0.712704	0.979686	0.441397	-0.142456	0.00727931	0.417779	-0.258188	0.261614	0.78802	0.490083	0.530573	0.659124	0.453057	0.953774	-0.619563	0.921536	0.379066	0.309668	0.530573	0.220905	0.176648	actin cytoskeleton organization;actin filament organization;actin filament-based process;actin nucleation;Arp2/3 complex-mediated actin nucleation;biological regulation;cellular component disassembly;cellular component disassembly at cellular level;cellular component organization;cellular component organization at cellular level;cellular component organization or biogenesis;cellular component org…	alpha-tubulin binding;binding;cytoskeletal protein binding;enzyme binding;protein binding;tubulin binding;ubiquitin protein ligase binding	autophagic vacuole;cell part;cell projection;centriole;cytoplasmic part;cytoplasmic vesicle;cytoskeletal part;early endosome;early endosome membrane;endosomal part;endosome;endosome membrane;filopodium;intracellular membrane-bounded organelle;intracellular non-membrane-bounded organelle;intracellular organelle;intracellular organelle part;intracellular part;invadopodium;lamellipodium;late endosom…	biological regulation;cellular component disassembly;cellular component organization;cellular process;cytoskeleton organization;endosome organization;endosome transport;establishment of localization;exocytosis;extracellular matrix organization;extracellular structure organization;organelle organization;protein targeting;protein transport;regulation of organelle organization;secretion;transport;va…	cell part;cell projection;endosome;filopodium;intracellular membrane-bounded organelle;intracellular non-membrane-bounded organelle;intracellular organelle;macromolecular complex;membrane;organelle;protein complex;vacuole;vesicle		WASH_WAHD	BRUINS_UVC_RESPONSE_LATE;CAMP_UP.V1_UP;chr15q26;chr9p24;E2F3_UP.V1_DN;GARY_CD5_TARGETS_UP;GINESTIER_BREAST_CANCER_ZNF217_AMPLIFIED_DN;GSE11924_TFH_VS_TH2_CD4_TCELL_UP;GSE14000_UNSTIM_VS_4H_LPS_DC_UP;GSE15750_WT_VS_TRAF6KO_DAY6_EFF_CD8_TCELL_UP;GSE17721_CPG_VS_GARDIQUIMOD_8H_BMDM_UP;GSE17721_LPS_VS_GARDIQUIMOD_8H_BMDM_UP;GSE17721_LPS_VS_PAM3CSK4_8H_BMDM_UP;GSE20715_WT_VS_TLR4_KO_LUNG_DN;GSE6566_ST…	Actin-binding;Cellprojection;Completeproteome;Cytoplasm;Cytoplasmicvesicle;Cytoskeleton;Endosome;Isopeptidebond;Membrane;Proteintransport;Referenceproteome;Transport;Ublconjugation		9	9	4	25.5	25.5	13.4	49.994	0	43.669	825950000	539070000	286870000	C4AMC7;Q6VEQ5;A8K0Z3;A8MWX3	C4AMC7;Q6VEQ5;A8K0Z3	Putative WAS protein family homolog 3;WAS protein family homolog 2;WAS protein family homolog 1	WASH3P;WASH2P;WASH1	69
-1.57916	-1.00541	-1.08043	-0.850907	-1.09425	-1.06429	-0.749067	-0.833341	-0.0138365	-0.839903	-0.826901	-1.1743	-1.18339	-0.766236	-0.988116	-0.762821	-0.601738	-1.44547	0.833093	-1.00541	-0.839903	0.165505	0.24119	anatomical structure development;anatomical structure morphogenesis;biological regulation;biosynthetic process;cardiac chamber development;cardiac ventricle development;cellular biosynthetic process;cellular macromolecule biosynthetic process;cellular macromolecule metabolic process;cellular metabolic process;cellular nitrogen compound metabolic process;cellular process;cellular protein metabolic…	binding;DNA binding;nucleic acid binding;protein binding;protein binding transcription factor activity;TBP-class protein binding;transcription coactivator activity;transcription cofactor activity;transcription factor binding;transcription factor binding transcription factor activity	cell part;cytoplasm;cytoplasmic part;extracellular membrane-bounded organelle;extracellular organelle;extracellular region part;extracellular vesicular exosome;intracellular membrane-bounded organelle;intracellular organelle;intracellular part;macromolecular complex;membrane-bounded organelle;membrane-bounded vesicle;nascent polypeptide-associated complex;nucleus;organelle;protein complex;vesicle	anatomical structure development;anatomical structure morphogenesis;biological regulation;biosynthetic process;cellular metabolic process;cellular nitrogen compound metabolic process;cellular process;developmental process;establishment of localization;growth;macromolecule metabolic process;metabolic process;nitrogen compound metabolic process;nucleobase-containing compound metabolic process;prima…	cell part;cytoplasm;extracellular organelle;intracellular membrane-bounded organelle;intracellular organelle;macromolecular complex;nucleus;organelle;protein complex;vesicle		NAC	BENPORATH_MYC_MAX_TARGETS;BIOSYNTHETIC_PROCESS;BOUDOUKHA_BOUND_BY_IGF2BP2;CAGCTG_V$AP4_Q5;CAGGTG_V$E12_Q6;CASORELLI_ACUTE_PROMYELOCYTIC_LEUKEMIA_UP;CELLULAR_BIOSYNTHETIC_PROCESS;CELLULAR_MACROMOLECULE_METABOLIC_PROCESS;CELLULAR_PROTEIN_METABOLIC_PROCESS;CHARAFE_BREAST_CANCER_LUMINAL_VS_BASAL_UP;chr12q23;CYTOPLASM;CYTOPLASMIC_PART;DANG_BOUND_BY_MYC;FEVR_CTNNB1_TARGETS_DN;FLECHNER_BIOPSY_KIDNEY_TRA…	3D-structure;Acetylation;Activator;Allergen;Alternativesplicing;Chaperone;Completeproteome;Cytoplasm;Directproteinsequencing;DNA-binding;Host-virusinteraction;Nucleus;Phosphoprotein;Polymorphism;Proteintransport;Referenceproteome;Repeat;Transcription;Transcriptionregulation;Transport		9	9	9	51.2	51.2	51.2	23.384	0	323.31	19017000000	9314800000	9702700000	Q13765;E9PAV3-2;E9PAV3;Q9BZK3	Q13765;E9PAV3-2;E9PAV3	Nascent polypeptide-associated complex subunit alpha;Nascent polypeptide-associated complex subunit alpha, muscle-specific form	NACA	214
0.919938	1.02577	0.53725	0.128721	NaN	1.20469	0.882104	0.657072	1.33752	1.11444	0.598271	0.952623	1.48501	0.696496	0.510858	0.114552	0.342805	0.847991	0.628185	0.901021	0.696496	-0.204524	0.206549							DUF4535	ATGGYGGA_UNKNOWN;CAGCTG_V$AP4_Q5;CAMP_UP.V1_UP;CCAGGTT,MIR-490;chr5q31;CTCAGGG,MIR-125B,MIR-125A;GRADE_COLON_CANCER_UP;GSE11924_TH1_VS_TH17_CD4_TCELL_DN;GSE14026_TH1_VS_TH17_UP;GSE14308_NAIVE_CD4_TCELL_VS_INDUCED_TREG_DN;GSE14308_TH1_VS_INDUCED_TREG_DN;GSE14308_TH17_VS_INDUCED_TREG_DN;GSE14350_TREG_VS_TEFF_DN;GSE17721_LPS_VS_CPG_12H_BMDM_DN;GSE17721_LPS_VS_CPG_8H_BMDM_DN;GSE17721_LPS_VS_GARDIQUIM…	Completeproteome;Referenceproteome		7	7	7	63.1	63.1	63.1	11.133	0	48.961	1975600000	1356200000	619320000	L0R6Q1	L0R6Q1		SLC35A4	218
-0.941152	0.561166	NaN	-0.217197	1.39481	1.22097	0.799612	0.51539	0.276264	2.95961	-0.277169	-0.155787	0.902612	0.149651	NaN	0.581216	NaN	NaN	0.675424	0.538278	0.365433	-0.172845	0.245961	catabolic process;cell differentiation;cellular catabolic process;cellular developmental process;cellular macromolecule catabolic process;cellular macromolecule metabolic process;cellular metabolic process;cellular nitrogen compound metabolic process;cellular process;developmental process;DNA catabolic process;DNA catabolic process, endonucleolytic;DNA fragmentation involved in apoptotic nuclear …	binding;catalytic activity;deoxyribonuclease activity;deoxyribonuclease II activity;DNA binding;endodeoxyribonuclease activity;endodeoxyribonuclease activity, producing 3'-phosphomonoesters;endonuclease activity;endonuclease activity, active with either ribo- or deoxyribonucleic acids and producing 3'-phosphomonoesters;hydrolase activity;hydrolase activity, acting on ester bonds;nuclease activity…	cell part;cytoplasmic part;extracellular membrane-bounded organelle;extracellular organelle;extracellular region part;extracellular vesicular exosome;intracellular;intracellular membrane-bounded organelle;intracellular organelle;intracellular part;lysosome;lytic vacuole;membrane-bounded organelle;membrane-bounded vesicle;organelle;vacuole;vesicle	catabolic process;cell differentiation;cellular metabolic process;cellular nitrogen compound metabolic process;cellular process;developmental process;DNA metabolic process;macromolecule metabolic process;metabolic process;nitrogen compound metabolic process;nucleobase-containing compound metabolic process;primary metabolic process	cell part;extracellular organelle;intracellular;intracellular membrane-bounded organelle;intracellular organelle;lysosome;organelle;vacuole;vesicle	Lysosome	DNase_II	BHATI_G2M_ARREST_BY_2METHOXYESTRADIOL_DN;BIOPOLYMER_METABOLIC_PROCESS;BONOME_OVARIAN_CANCER_POOR_SURVIVAL_DN;BONOME_OVARIAN_CANCER_SURVIVAL_SUBOPTIMAL_DEBULKING;chr19p13;CHYLA_CBFA2T3_TARGETS_DN;CYCLIN_D1_KE_.V1_UP;CYCLIN_D1_UP.V1_UP;CYTOPLASM;CYTOPLASMIC_PART;DACOSTA_UV_RESPONSE_VIA_ERCC3_UP;DEOXYRIBONUCLEASE_ACTIVITY;DNA_BINDING;DNA_METABOLIC_PROCESS;ENDODEOXYRIBONUCLEASE_ACTIVITY;ENDONUCLEASE_…	Alternativesplicing;Apoptosis;Completeproteome;Developmentalprotein;Disulfidebond;Endonuclease;Glycoprotein;Hydrolase;Lysosome;Nuclease;Polymorphism;Referenceproteome;Signal		6	6	6	19.7	19.7	19.7	33.615	0	23.665	1181700000	699020000	482650000	O00115-2;O00115	O00115-2;O00115	Deoxyribonuclease-2-alpha	DNASE2	219
0.413216	-0.65452	-0.739563	-0.609665	0.0162556	0.138094	-0.664835	-0.619202	0.655409	-0.850491	-0.602234	-0.238165	-0.172372	-0.505355	-0.633904	-0.837203	-0.451159	0.203435	0.307843	-0.609665	-0.505355	0.10431	0.325226	biosynthetic process;cellular biosynthetic process;cellular lipid metabolic process;cellular metabolic process;cellular process;ether lipid biosynthetic process;ether lipid metabolic process;glycerol ether biosynthetic process;glycerol ether metabolic process;glycerolipid biosynthetic process;glycerolipid metabolic process;lipid biosynthetic process;lipid metabolic process;metabolic process;organ…	alkylglycerone-phosphate synthase activity;binding;catalytic activity;coenzyme binding;cofactor binding;FAD binding;flavin adenine dinucleotide binding;oxidoreductase activity;oxidoreductase activity, acting on CH-OH group of donors;oxidoreductase activity, acting on the CH-OH group of donors, NAD or NADP as acceptor;transferase activity;transferase activity, transferring alkyl or aryl (other tha…	cell part;cytoplasmic part;intracellular membrane-bounded organelle;intracellular non-membrane-bounded organelle;intracellular organelle;intracellular organelle lumen;intracellular organelle part;intracellular part;membrane;membrane-bounded organelle;membrane-enclosed lumen;microbody;microbody lumen;microbody membrane;microbody part;mitochondrion;non-membrane-bounded organelle;nuclear part;nucleo…	biosynthetic process;cellular lipid metabolic process;cellular metabolic process;cellular process;glycerol ether metabolic process;lipid metabolic process;metabolic process;primary metabolic process;small molecule metabolic process	cell part;intracellular membrane-bounded organelle;intracellular non-membrane-bounded organelle;intracellular organelle;membrane;microbody;mitochondrion;nucleolus;organelle;peroxisome	Ether lipid metabolism;Peroxisome	FAD_binding_4;FAD-oxidase_C	BECKER_TAMOXIFEN_RESISTANCE_DN;BENPORATH_MYC_MAX_TARGETS;BIOSYNTHETIC_PROCESS;CAGGTA_V$AREB6_01;CAIRO_HEPATOBLASTOMA_CLASSES_UP;CELLULAR_LIPID_METABOLIC_PROCESS;CHARAFE_BREAST_CANCER_LUMINAL_VS_BASAL_DN;CHARAFE_BREAST_CANCER_LUMINAL_VS_MESENCHYMAL_DN;CHIARETTI_ACUTE_LYMPHOBLASTIC_LEUKEMIA_ZAP70;chr2q;CYTOPLASM;CYTOPLASMIC_PART;DANG_BOUND_BY_MYC;DIAZ_CHRONIC_MEYLOGENOUS_LEUKEMIA_UP;DURCHDEWALD_SKI…	Acetylation;Cataract;Completeproteome;Diseasemutation;Dwarfism;FAD;Flavoprotein;Lipidbiosynthesis;Lipidmetabolism;Membrane;Peroxisome;Phosphoprotein;Referenceproteome;Rhizomelicchondrodysplasiapunctata;Transferase;Transitpeptide	AGPS-GNPAT complex	33	33	33	60.6	60.6	60.6	72.911	0	323.31	11728000000	7051600000	4676100000	O00116	O00116	Alkyldihydroxyacetonephosphate synthase, peroxisomal	AGPS	220
0.139426	-0.0381984	-0.257129	-0.60247	0.405713	-0.400839	0.358513	0.397367	-0.0592706	-0.138987	-0.136397	-0.534878	0.105609	-0.203321	-0.113707	-0.0234185	0.136443	-0.038019	0.487761	-0.0381984	-0.113707	-0.0755081	0.38815	anatomical structure development;antigen processing and presentation;antigen processing and presentation of exogenous antigen;antigen processing and presentation of exogenous peptide antigen;antigen processing and presentation of exogenous peptide antigen via MHC class II;antigen processing and presentation of peptide antigen;antigen processing and presentation of peptide antigen via MHC class II…	adenyl nucleotide binding;adenyl ribonucleotide binding;ATP binding;ATPase activity;binding;catalytic activity;hydrolase activity;hydrolase activity, acting on acid anhydrides;hydrolase activity, acting on acid anhydrides, in phosphorus-containing anhydrides;microtubule motor activity;motor activity;nucleoside-triphosphatase activity;nucleotide binding;purine nucleotide binding;purine ribonucleos…	cell part;centrosome;cytoplasmic part;cytoskeletal part;cytosol;intracellular non-membrane-bounded organelle;intracellular organelle;intracellular organelle part;intracellular part;kinesin complex;macromolecular complex;membrane;microtubule;microtubule associated complex;microtubule organizing center;non-membrane-bounded organelle;organelle;organelle part;protein complex;spindle pole	anatomical structure development;biological regulation;cell cycle;cell differentiation;cell division;cellular component assembly;cellular component disassembly;cellular component movement;cellular component organization;cellular process;coagulation;cytoskeleton organization;developmental process;immune system process;metabolic process;mitotic cell cycle;multicellular organismal process;organelle …	cell part;centrosome;cytosol;intracellular non-membrane-bounded organelle;intracellular organelle;macromolecular complex;membrane;microtubule organizing center;organelle;protein complex		Kinesin	AAAGGAT,MIR-501;ACATTCC,MIR-1,MIR-206;ATACCTC,MIR-202;BLALOCK_ALZHEIMERS_DISEASE_DN;BORCZUK_MALIGNANT_MESOTHELIOMA_UP;BOYAULT_LIVER_CANCER_SUBCLASS_G3_UP;BURTON_ADIPOGENESIS_12;CATTTCA,MIR-203;chr5q12;CTTTGT_V$LEF1_Q2;DACOSTA_UV_RESPONSE_VIA_ERCC3_COMMON_DN;DACOSTA_UV_RESPONSE_VIA_ERCC3_DN;DAZARD_RESPONSE_TO_UV_NHEK_DN;DAZARD_RESPONSE_TO_UV_SCC_DN;DAZARD_UV_RESPONSE_CLUSTER_G6;DIAZ_CHRONIC_MEYLOG…	3D-structure;Acetylation;Alternativesplicing;ATP-binding;Cellcycle;Celldivision;Coiledcoil;Completeproteome;Cytoplasm;Cytoskeleton;Developmentalprotein;Differentiation;Diseasemutation;Microtubule;Mitosis;Motorprotein;Neurogenesis;Nucleotide-binding;Phosphoprotein;Referenceproteome		20	20	18	33.8	33.8	31.5	75.042	0	63.65	1974700000	1165800000	808810000	O00139-2;O00139-1;O00139-5;O00139;O00139-4;Q8N4N8	O00139-2;O00139-1;O00139-5;O00139;O00139-4	Kinesin-like protein KIF2A	KIF2A	221
-0.30709	-0.456072	-0.854432	-0.854454	-0.959099	-0.256295	0.0359926	-0.417094	0.173298	-0.990732	-0.346546	-0.153683	-0.927445	-0.857557	-0.77912	-0.582031	-0.615934	-0.263482	0.297074	-0.417094	-0.615934	-0.19884	0.213332	biological regulation;cellular macromolecule metabolic process;cellular metabolic process;cellular nitrogen compound metabolic process;cellular process;cellular response to stimulus;cellular response to stress;establishment of localization;establishment of localization in cell;establishment of RNA localization;intracellular transport;macromolecule metabolic process;metabolic process;mRNA export f…	adenyl nucleotide binding;adenyl ribonucleotide binding;ATP binding;ATPase activity;ATPase activity, coupled;ATP-dependent helicase activity;ATP-dependent RNA helicase activity;binding;catalytic activity;helicase activity;hydrolase activity;hydrolase activity, acting on acid anhydrides;hydrolase activity, acting on acid anhydrides, in phosphorus-containing anhydrides;nucleoside-triphosphatase act…	cell part;cytoplasm;intracellular membrane-bounded organelle;intracellular non-membrane-bounded organelle;intracellular organelle;intracellular organelle part;intracellular part;macromolecular complex;membrane;membrane-bounded organelle;non-membrane-bounded organelle;nuclear part;nucleolus;nucleus;organelle;organelle part;ribonucleoprotein complex;spliceosomal complex	biological regulation;cellular metabolic process;cellular nitrogen compound metabolic process;cellular process;establishment of localization;macromolecule metabolic process;metabolic process;mRNA metabolic process;mRNA processing;nitrogen compound metabolic process;nuclear transport;nucleobase-containing compound metabolic process;nucleobase-containing compound transport;nucleocytoplasmic transpo…	cell part;cytoplasm;intracellular membrane-bounded organelle;intracellular non-membrane-bounded organelle;intracellular organelle;macromolecular complex;membrane;nucleolus;nucleus;organelle;ribonucleoprotein complex;spliceosomal complex		DEAD;Helicase_C	AGCTCCT,MIR-28;ATP_DEPENDENT_HELICASE_ACTIVITY;ATP_DEPENDENT_RNA_HELICASE_ACTIVITY;ATPASE_ACTIVITY;ATPASE_ACTIVITY_COUPLED;BASAKI_YBX1_TARGETS_UP;BENPORATH_NANOG_TARGETS;BENPORATH_SOX2_TARGETS;BIOPOLYMER_METABOLIC_PROCESS;BLALOCK_ALZHEIMERS_DISEASE_UP;BLUM_RESPONSE_TO_SALIRASIB_DN;BROWNE_HCMV_INFECTION_14HR_UP;CAIRO_HEPATOBLASTOMA_CLASSES_UP;CELLULAR_LOCALIZATION;chr19p13;chr6p21;CTTTGA_V$LEF1_Q2…	Acetylation;Alternativesplicing;ATP-binding;Completeproteome;Cytoplasm;Helicase;Hydrolase;mRNAprocessing;mRNAsplicing;Nucleotide-binding;Nucleus;Phosphoprotein;Polymorphism;Referenceproteome;RNA-binding	Emerin complex 52	31	19	19	69.1	46.1	46.1	49.129	0	315.85	11008000000	5891000000	5117000000	O00148;O00148-2;O00148-3	O00148;O00148-2;O00148-3	ATP-dependent RNA helicase DDX39A	DDX39A	223
0.353678	0.70182	1.10672	0.0656245	0.765971	0.780704	0.693675	1.51583	-0.0127692	0.109004	0.139719	-0.102062	0.438587	0.634143	0.758014	1.01213	1.12017	-0.544632	0.286834	0.70182	0.438587	-0.263232	0.144212	biological regulation;regulation of biological process;regulation of biosynthetic process;regulation of cellular biosynthetic process;regulation of cellular macromolecule biosynthetic process;regulation of cellular metabolic process;regulation of cellular process;regulation of gene expression;regulation of macromolecule biosynthetic process;regulation of macromolecule metabolic process;regulation…	binding;cation binding;ion binding;metal ion binding;protein binding transcription factor activity;transcription coactivator activity;transcription cofactor activity;transcription factor binding transcription factor activity;transition metal ion binding;zinc ion binding	adherens junction;anchoring junction;cell junction;cell part;cell-substrate adherens junction;cell-substrate junction;cytoplasm;cytoskeleton;focal adhesion;intracellular non-membrane-bounded organelle;intracellular organelle;intracellular organelle part;intracellular part;macromolecular complex;non-membrane-bounded organelle;nuclear part;nucleoplasm part;organelle;organelle part;protein complex;t…	biological regulation;response to chemical stimulus;response to oxidative stress;response to stimulus;response to stress	cell part;cytoplasm;cytoskeleton;intracellular non-membrane-bounded organelle;intracellular organelle;macromolecular complex;organelle;protein complex;transcription factor complex		LIM;PDZ	BERENJENO_TRANSFORMED_BY_RHOA_UP;BOYLAN_MULTIPLE_MYELOMA_C_D_UP;BYSTRYKH_HEMATOPOIESIS_STEM_CELL_AND_BRAIN_QTL_TRANS;CHAUHAN_RESPONSE_TO_METHOXYESTRADIOL_DN;CHEMELLO_SOLEUS_VS_EDL_MYOFIBERS_UP;CHICAS_RB1_TARGETS_CONFLUENT;chr10q23;CHUNG_BLISTER_CYTOTOXICITY_DN;CREIGHTON_ENDOCRINE_THERAPY_RESISTANCE_4;CTTTGT_V$LEF1_Q2;DELACROIX_RAR_BOUND_ES;DELYS_THYROID_CANCER_UP;DUTERTRE_ESTRADIOL_RESPONSE_24HR_…	3D-structure;Acetylation;Completeproteome;Cytoplasm;Cytoskeleton;Directproteinsequencing;LIMdomain;Metal-binding;Phosphoprotein;Polymorphism;Referenceproteome;Zinc		20	20	20	82.7	82.7	82.7	36.071	0	323.31	9138800000	5676200000	3462600000	O00151	O00151	PDZ and LIM domain protein 1	PDLIM1	224
-2.01096	-2.23252	-1.66278	-1.53308	-1.75555	-4.0989	-2.0181	-1.17332	-0.913655	-2.55244	-2.72903	-1.7457	-2.06154	-1.62593	-1.15862	-1.77174	-2.27766	-1.89867	0.893956	-1.75555	-1.89867	-0.143119	0.286326	biosynthetic process;carboxylic acid biosynthetic process;carboxylic acid catabolic process;carboxylic acid metabolic process;catabolic process;cellular biosynthetic process;cellular catabolic process;cellular ketone metabolic process;cellular lipid catabolic process;cellular lipid metabolic process;cellular metabolic process;cellular nitrogen compound metabolic process;cellular process;coenzyme …	acyl-CoA thioesterase activity;binding;carboxylic acid binding;carboxylic ester hydrolase activity;catalytic activity;CoA hydrolase activity;coenzyme binding;cofactor binding;fatty acid binding;fatty-acyl-CoA binding;hydrolase activity;hydrolase activity, acting on ester bonds;identical protein binding;lipid binding;monocarboxylic acid binding;palmitoyl-CoA hydrolase activity;protein binding;prot…	cell body;cell part;cell projection;cytoplasm;cytoplasmic part;cytosol;extracellular membrane-bounded organelle;extracellular organelle;extracellular region part;extracellular vesicular exosome;intracellular membrane-bounded organelle;intracellular organelle;intracellular organelle part;intracellular part;membrane-bounded organelle;membrane-bounded vesicle;mitochondrion;neuron projection;nuclear …	biosynthetic process;catabolic process;cellular ketone metabolic process;cellular lipid metabolic process;cellular metabolic process;cellular nitrogen compound metabolic process;cellular process;cofactor metabolic process;heterocycle metabolic process;lipid metabolic process;metabolic process;nitrogen compound metabolic process;nucleobase-containing compound metabolic process;nucleobase-containin…	cell body;cell part;cell projection;cytoplasm;cytosol;extracellular organelle;intracellular membrane-bounded organelle;intracellular organelle;mitochondrion;neuron projection;nucleoplasm;organelle;vesicle	Biosynthesis of unsaturated fatty acids	4HBT	ACCAAAG,MIR-9;ATGAAGG,MIR-205;BERENJENO_TRANSFORMED_BY_RHOA_UP;BILD_HRAS_ONCOGENIC_SIGNATURE;BLALOCK_ALZHEIMERS_DISEASE_DN;BONOME_OVARIAN_CANCER_POOR_SURVIVAL_DN;BONOME_OVARIAN_CANCER_SURVIVAL_SUBOPTIMAL_DEBULKING;CAGTGTT,MIR-141,MIR-200A;CHIARADONNA_NEOPLASTIC_TRANSFORMATION_CDC25_DN;CHIARADONNA_NEOPLASTIC_TRANSFORMATION_KRAS_CDC25_UP;CHICAS_RB1_TARGETS_CONFLUENT;CHICAS_RB1_TARGETS_SENESCENT;chr…	3D-structure;Acetylation;Alternativesplicing;Completeproteome;Cytoplasm;Directproteinsequencing;Hydrolase;Mitochondrion;Referenceproteome;Repeat;Serineesterase		12	12	12	47.6	47.6	47.6	37.419	0	59.325	1748700000	618450000	1130300000	O00154-4;O00154-6;O00154-7;O00154;O00154-5;O00154-2;O00154-3	O00154-4;O00154-6;O00154-7;O00154;O00154-5;O00154-2;O00154-3	Cytosolic acyl coenzyme A thioester hydrolase	ACOT7	225
NaN	-2.39573	-1.22464	-2.23787	NaN	NaN	NaN	-1.09276	-1.25001	NaN	-0.846072	-2.06567	NaN	NaN	-0.316479	-1.47746	NaN	-1.45853	0.34862	-1.25001	-1.45853	-0.20852	0.201858	biological regulation;cellular component organization;cellular component organization or biogenesis;defense response;establishment of localization;establishment of localization in cell;establishment of protein localization;establishment of RNA localization;immune response;immune system process;innate immune response;intracellular protein transport;intracellular transport;membrane organization;mRN…	actin-dependent ATPase activity;adenyl nucleotide binding;adenyl ribonucleotide binding;ATP binding;ATPase activity;ATPase activity, coupled;binding;catalytic activity;enzyme binding;GTPase binding;hydrolase activity;hydrolase activity, acting on acid anhydrides;hydrolase activity, acting on acid anhydrides, in phosphorus-containing anhydrides;motor activity;nucleoside-triphosphatase activity;nuc…	basal plasma membrane;brush border;cell part;cell projection;cell projection membrane;cell projection part;cytoplasm;cytoplasmic membrane-bounded vesicle;cytoplasmic part;cytoplasmic vesicle;cytoskeletal part;cytosol;extracellular membrane-bounded organelle;extracellular organelle;extracellular region part;extracellular vesicular exosome;filamentous actin;intracellular membrane-bounded organelle;…	biological regulation;cellular component organization;establishment of localization;immune system process;membrane organization;nucleobase-containing compound transport;protein targeting;protein transport;regulation of transport;response to stimulus;response to stress;transport	brush border;cell part;cell projection;cytoplasm;cytoplasmic membrane-bounded vesicle;cytosol;extracellular organelle;intracellular membrane-bounded organelle;intracellular non-membrane-bounded organelle;intracellular organelle;macromolecular complex;membrane;microvillus;mitochondrion;nuclear pore;nucleolus;nucleoplasm;organelle;plasma membrane;protein complex;vesicle		IQ;Myosin_head;Myosin_TH1	ACCAAAG,MIR-9;ACTIN_CYTOSKELETON;ACTIN_FILAMENT;AFFAR_YY1_TARGETS_UP;BASOLATERAL_PLASMA_MEMBRANE;BLALOCK_ALZHEIMERS_DISEASE_UP;BRUINS_UVC_RESPONSE_VIA_TP53_GROUP_A;CAGCTG_V$AP4_Q5;CELL_PROJECTION;CHIARADONNA_NEOPLASTIC_TRANSFORMATION_CDC25_DN;chr17p13;CUI_TCF21_TARGETS_2_DN;CYCLIN_D1_UP.V1_DN;CYTOPLASM;CYTOSKELETAL_PART;CYTOSKELETON;DANG_REGULATED_BY_MYC_DN;GACAGGG,MIR-339;GATAAGR_V$GATA_C;GAVIN_…	3D-structure;Acetylation;Actin-binding;Alternativesplicing;ATP-binding;Calmodulin-binding;Cellmembrane;Cellprojection;Completeproteome;Cytoplasm;Cytoplasmicvesicle;Directproteinsequencing;Membrane;Methylation;Motorprotein;mRNAtransport;Myosin;Nuclearporecomplex;Nucleotide-binding;Nucleus;Phosphoprotein;Polymorphism;Proteintransport;Referenceproteome;Repeat;Translocation;Transport		9	9	9	11.8	11.8	11.8	117.91	0	21.695	217040000	94150000	122890000	O00159-2;O00159-3;O00159	O00159-2;O00159-3;O00159	Unconventional myosin-Ic	MYO1C	226
-0.323035	0.563013	0.872555	1.23873	-1.24766	-0.0993298	-0.439235	0.798206	0.16068	-0.542665	1.26122	0.572187	-0.475267	0.685024	0.93862	0.339628	0.274785	0.110989	0.58692	0.16068	0.339628	0.178948	0.224448	biological regulation;cell activation;cell activation involved in immune response;cellular process;defense response;defense response to bacterium;defense response to Gram-positive bacterium;establishment of localization;establishment of localization in cell;exocytosis;immune effector process;immune system process;leukocyte activation;leukocyte activation involved in immune response;leukocyte degr…	actin binding;adenyl nucleotide binding;adenyl ribonucleotide binding;ATP binding;binding;catalytic activity;cytoskeletal protein binding;hydrolase activity;hydrolase activity, acting on acid anhydrides;hydrolase activity, acting on acid anhydrides, in phosphorus-containing anhydrides;motor activity;nucleoside-triphosphatase activity;nucleotide binding;protein binding;purine nucleotide binding;pu…	cell cortex part;cell part;cortical actin cytoskeleton;cortical cytoskeleton;cytoplasmic part;cytoskeletal part;cytoskeleton;filamentous actin;intracellular non-membrane-bounded organelle;intracellular organelle;intracellular organelle part;intracellular part;macromolecular complex;myosin complex;non-membrane-bounded organelle;organelle;organelle part;protein complex;unconventional myosin complex	biological regulation;cell activation;cellular process;establishment of localization;exocytosis;immune system process;multi-organism process;regulation of organelle organization;response to biotic stimulus;response to stimulus;response to stress;secretion;transport;vesicle-mediated transport	cell part;cytoskeleton;intracellular non-membrane-bounded organelle;intracellular organelle;macromolecular complex;organelle;protein complex		Myosin_head;Myosin_TH1;SH3_9	BOYLAN_MULTIPLE_MYELOMA_C_D_DN;BYSTRYKH_HEMATOPOIESIS_STEM_CELL_QTL_TRANS;CAGCTG_V$AP4_Q5;CHEN_METABOLIC_SYNDROM_NETWORK;chr19p13;COATES_MACROPHAGE_M1_VS_M2_DN;CTACCTC,LET-7A,LET-7B,LET-7C,LET-7D,LET-7E,LET-7F,MIR-98,LET-7G,LET-7I;CTGCAGY_UNKNOWN;CYCLIN_D1_KE_.V1_DN;CYCLIN_D1_UP.V1_DN;DUNNE_TARGETS_OF_AML1_MTG8_FUSION_UP;GAVIN_FOXP3_TARGETS_CLUSTER_P3;GAVIN_FOXP3_TARGETS_CLUSTER_P6;GNF2_CASP1;GNF…	Actin-binding;ATP-binding;Calmodulin-binding;Completeproteome;Motorprotein;Myosin;Nucleotide-binding;Phosphoprotein;Polymorphism;Referenceproteome;SH3domain		55	55	48	56.9	56.9	51.8	124.84	0	323.31	16330000000	11200000000	5129300000	O00160	O00160	Unconventional myosin-If	MYO1F	227
0.485011	0.346634	0.623985	0.732624	0.270557	-0.496148	0.313875	0.847833	0.606988	0.183783	0.517567	0.6054	0.50002	0.420976	0.762386	0.174028	-0.141219	0.712526	0.99781	0.485011	0.50002	0.0150087	0.464437	amine transport;biological regulation;cellular component assembly;cellular component assembly at cellular level;cellular component organization;cellular component organization at cellular level;cellular component organization or biogenesis;cellular component organization or biogenesis at cellular level;cellular macromolecular complex assembly;cellular macromolecular complex subunit organization;c…	binding;protein binding;SNAP receptor activity;SNARE binding;syntaxin binding	adherens junction;anchoring junction;azurophil granule;cell junction;cell part;cell projection;cell-substrate adherens junction;cell-substrate junction;cytoplasm;cytoplasmic membrane-bounded vesicle;cytoplasmic part;cytoplasmic vesicle;extracellular membrane-bounded organelle;extracellular organelle;extracellular region part;extracellular vesicular exosome;focal adhesion;intracellular membrane-bo…	amine transport;biological regulation;cellular component assembly;cellular component organization;cellular macromolecular complex assembly;cellular membrane organization;cellular process;establishment of localization;Golgi vesicle transport;hormone transport;macromolecular complex assembly;membrane fusion;membrane organization;organelle fusion;organelle organization;protein complex assembly;prote…	cell part;cell projection;cytoplasm;cytoplasmic membrane-bounded vesicle;extracellular organelle;intracellular membrane-bounded organelle;intracellular organelle;lysosome;macromolecular complex;membrane;neuron projection;nucleoplasm;organelle;plasma membrane;protein complex;synapse;vacuole;vesicle	SNARE interactions in vesicular transport	SNAP-25;SNARE	BRUINS_UVC_RESPONSE_EARLY_LATE;BRUNO_HEMATOPOIESIS;BUYTAERT_PHOTODYNAMIC_THERAPY_STRESS_UP;BYSTRYKH_HEMATOPOIESIS_STEM_CELL_QTL_TRANS;CELLULAR_LOCALIZATION;chr15q14;CHUNG_BLISTER_CYTOTOXICITY_DN;CROONQUIST_NRAS_VS_STROMAL_STIMULATION_UP;CUI_TCF21_TARGETS_2_DN;CYTOSKELETON_ORGANIZATION_AND_BIOGENESIS;DIAZ_CHRONIC_MEYLOGENOUS_LEUKEMIA_UP;ESTABLISHMENT_OF_CELLULAR_LOCALIZATION;ESTABLISHMENT_OF_LOCAL…	3D-structure;Acetylation;Alternativesplicing;Celljunction;Cellmembrane;Coiledcoil;Completeproteome;Directproteinsequencing;Lipoprotein;Membrane;Palmitate;Phosphoprotein;Proteintransport;Referenceproteome;Repeat;Synapse;Synaptosome;Transport	SNARE complex (SNAP23, STX1A);SNARE complex (STX11, VAMP2, SNAP23);SNARE complex (STX2, SNAP23);SNARE complex (STX4, SNAP23);SNARE complex (STX4, SNAP23, VAMP1);SNARE complex (STX4, SNAP23, VAMP2);SNARE complex (STX4, VAMP8, VAMP3, SNAP23);SNARE complex (STX6, SNAP23)	14	14	14	69.2	69.2	69.2	23.354	0	112.84	1797900000	1222900000	574950000	O00161;O00161-2	O00161;O00161-2	Synaptosomal-associated protein 23	SNAP23	228
-0.396102	-0.324673	-1.17657	-1.50316	0.506615	0.154558	-0.442682	-1.24808	0.375384	-0.908117	-0.273612	-1.02121	-0.113137	-1.35508	-1.28925	-0.819061	-0.575016	-0.100584	0.374845	-0.396102	-0.819061	-0.422959	0.0424369	biological regulation;cellular component organization;cellular component organization or biogenesis;cellular process;cellular response to chemical stimulus;cellular response to cytokine stimulus;cellular response to organic substance;cellular response to stimulus;negative regulation of apoptosis;negative regulation of biological process;negative regulation of cell death;negative regulation of cel…	binding;cytokine binding;growth factor binding;interleukin-1 binding;protein binding;protein N-terminus binding	actin cytoskeleton;apical plasma membrane;cell part;cell projection;clathrin-coated vesicle;coated vesicle;cytoplasmic membrane-bounded vesicle;cytoplasmic part;cytoplasmic vesicle;cytoskeleton;endoplasmic reticulum;envelope;intracellular membrane-bounded organelle;intracellular non-membrane-bounded organelle;intracellular organelle;intracellular organelle part;intracellular part;lamellipodium;ma…	biological regulation;cellular component organization;cellular process;regulation of organelle organization;regulation of protein modification process;response to chemical stimulus;response to stimulus	cell part;cell projection;cytoplasmic membrane-bounded vesicle;cytoskeleton;endoplasmic reticulum;intracellular membrane-bounded organelle;intracellular non-membrane-bounded organelle;intracellular organelle;macromolecular complex;membrane;mitochondrion;nuclear envelope;organelle;protein complex;transcription factor complex;vesicle			ACEVEDO_LIVER_TUMOR_VS_NORMAL_ADJACENT_TISSUE_UP;BENPORATH_MYC_MAX_TARGETS;BOHN_PRIMARY_IMMUNODEFICIENCY_SYNDROM_UP;CAMP_UP.V1_UP;CELL_FRACTION;chr1q21;CYTOKINE_BINDING;CYTOPLASM;CYTOPLASMIC_PART;DANG_BOUND_BY_MYC;DELPUECH_FOXO3_TARGETS_DN;DITTMER_PTHLH_TARGETS_UP;ENDOPLASMIC_RETICULUM;FLECHNER_PBL_KIDNEY_TRANSPLANT_OK_VS_DONOR_UP;FULCHER_INFLAMMATORY_RESPONSE_LECTIN_VS_LPS_UP;GOTZMANN_EPITHELIAL…	Acetylation;Alternativesplicing;Completeproteome;Cytoplasmicvesicle;Directproteinsequencing;Diseasemutation;Endoplasmicreticulum;Membrane;Mitochondrion;Nucleus;Polymorphism;Referenceproteome;Sarcoplasmicreticulum		6	6	6	41.1	41.1	41.1	26.099	0	16.554	208150000	104710000	103440000	O00165-5;O00165;O00165-2;O00165-3;O00165-4;O00165-6	O00165-5;O00165;O00165-2;O00165-3;O00165-4	HCLS1-associated protein X-1	HAX1	229
-0.839742	-0.237552	-0.552842	0.189964	-0.74938	-0.839264	-0.48276	0.170865	-1.29234	-0.263718	0.126438	-0.447641	-0.862514	0.265411	0.132211	-0.000839344	-0.342966	-0.880205	0.242405	-0.552842	-0.263718	0.289124	0.113873	biological regulation;cellular macromolecule metabolic process;cellular metabolic process;cellular process;cellular protein metabolic process;cellular response to stimulus;establishment of localization;establishment of localization in cell;establishment of protein localization;establishment of protein localization in mitochondrion;establishment of protein localization to organelle;intracellular p…	binding;GAF domain binding;molecular transducer activity;protein binding;protein binding transcription factor activity;protein domain specific binding;signal transducer activity;transcription coactivator activity;transcription cofactor activity;transcription factor binding;transcription factor binding transcription factor activity;unfolded protein binding	cell part;cytoplasm;cytoplasmic part;cytosol;intracellular organelle part;intracellular part;membrane;nuclear part;nucleoplasm;organelle part	biological regulation;cellular metabolic process;cellular process;establishment of localization;macromolecule metabolic process;metabolic process;primary metabolic process;protein folding;protein maturation;protein metabolic process;protein targeting;protein transport;response to stimulus;signal transduction;transport;xenobiotic metabolic process	cell part;cytoplasm;cytosol;membrane;nucleoplasm		FKBP_C	BYSTRYKH_HEMATOPOIESIS_STEM_CELL_AND_BRAIN_QTL_TRANS;CELLULAR_MACROMOLECULE_METABOLIC_PROCESS;CELLULAR_PROTEIN_METABOLIC_PROCESS;CHIARETTI_ACUTE_LYMPHOBLASTIC_LEUKEMIA_ZAP70;chr11q13;CRGAARNNNNCGA_UNKNOWN;CYTOPLASM;CYTOPLASMIC_PART;CYTOSOL;DAIRKEE_TERT_TARGETS_UP;ESTABLISHMENT_OF_LOCALIZATION;ESTABLISHMENT_OF_PROTEIN_LOCALIZATION;GARY_CD5_TARGETS_UP;GCCATNTTG_V$YY1_Q6;GCM_AIP;GCM_FANCC;GCM_HDAC1;…	3D-structure;Completeproteome;Cushingsyndrome;Cytoplasm;Polymorphism;Referenceproteome;Repeat;TPRrepeat		19	19	19	70	70	70	37.636	0	195.71	7122800000	4054800000	3068000000	O00170	O00170	AH receptor-interacting protein	AIP	230
-0.776181	0.325912	0.145349	0.228562	-0.53261	0.489098	0.664278	0.571074	-0.0838732	-0.326708	0.165597	-0.514546	0.859976	0.189945	0.0906538	0.507986	0.867638	-0.644104	0.941942	0.228562	0.165597	-0.0629652	0.408192	biological regulation;cellular process;cellular response to stimulus;immune response;immune system process;metabolic process;positive regulation of biological process;positive regulation of catabolic process;positive regulation of cellular catabolic process;positive regulation of cellular metabolic process;positive regulation of cellular process;positive regulation of macromolecule metabolic proc…	binding;catalytic activity;GTP binding;GTPase activity;guanyl nucleotide binding;guanyl ribonucleotide binding;hydrolase activity;hydrolase activity, acting on acid anhydrides;hydrolase activity, acting on acid anhydrides, in phosphorus-containing anhydrides;nucleoside-triphosphatase activity;nucleotide binding;purine nucleotide binding;purine ribonucleoside triphosphate binding;purine ribonucleo…	cell part;cytoplasmic exosome (RNase complex);cytoplasmic part;cytosol;exosome (RNase complex);intracellular part;macromolecular complex;membrane;protein complex	biological regulation;cellular process;immune system process;metabolic process;response to stimulus;signal transduction	cell part;cytosol;exosome (RNase complex);macromolecular complex;membrane;protein complex		GTP_EFTU;GTP_EFTU_D2;GTP_EFTU_D3	ACEVEDO_METHYLATED_IN_LIVER_CANCER_DN;AGUIRRE_PANCREATIC_CANCER_COPY_NUMBER_DN;AMUNDSON_GAMMA_RADIATION_RESPONSE;AMUNDSON_GENOTOXIC_SIGNATURE;BENPORATH_NANOG_TARGETS;BENPORATH_OCT4_TARGETS;BLALOCK_ALZHEIMERS_DISEASE_UP;BYSTRYKH_HEMATOPOIESIS_STEM_CELL_QTL_TRANS;CACGTG_V$MYC_Q2;chr22q13;CTGCAGY_UNKNOWN;DORSAM_HOXA9_TARGETS_UP;GACAATC,MIR-219;GARY_CD5_TARGETS_UP;GATTGGY_V$NFY_Q6_01;GCM_BCL2L1;GCM_D…	Completeproteome;Cytoplasm;GTP-binding;Nucleotide-binding;Phosphoprotein;Polymorphism;Referenceproteome		19	19	19	46.5	46.5	46.5	72.453	0	138.93	1284900000	789880000	495040000	O00178	O00178	GTP-binding protein 1	GTPBP1	231
0.153279	1.34445	1.18802	0.232967	0.0385356	0.467943	0.326381	-0.0252468	-0.371443	0.804103	0.666241	0.467829	1.55656	0.904406	0.673287	1.13639	0.453554	-0.177779	0.177739	0.232967	0.673287	0.44032	0.0342082	biological regulation;cellular process;cellular response to stimulus;positive regulation of biological process;positive regulation of cell communication;positive regulation of cellular process;positive regulation of I-kappaB kinase/NF-kappaB cascade;positive regulation of intracellular protein kinase cascade;positive regulation of response to stimulus;positive regulation of signal transduction;po…	binding;carbohydrate binding;galactose binding;molecular transducer activity;monosaccharide binding;signal transducer activity;sugar binding	cell part;cytoplasm;extracellular membrane-bounded organelle;extracellular organelle;extracellular region part;extracellular vesicular exosome;intracellular part;membrane-bounded organelle;membrane-bounded vesicle;organelle;vesicle	biological regulation;cellular process;response to stimulus;signal transduction	cell part;cytoplasm;extracellular organelle;organelle;vesicle		Gal-bind_lectin	AFFAR_YY1_TARGETS_UP;BASSO_B_LYMPHOCYTE_NETWORK;BERENJENO_TRANSFORMED_BY_RHOA_DN;BLALOCK_ALZHEIMERS_DISEASE_UP;BRCA1_DN.V1_UP;BURTON_ADIPOGENESIS_9;CAIRO_LIVER_DEVELOPMENT_DN;CARBOHYDRATE_BINDING;CHIARADONNA_NEOPLASTIC_TRANSFORMATION_CDC25_DN;CHIARADONNA_NEOPLASTIC_TRANSFORMATION_KRAS_DN;chr17q11;COLDREN_GEFITINIB_RESISTANCE_DN;COLINA_TARGETS_OF_4EBP1_AND_4EBP2;CTIP_DN.V1_UP;FERRANDO_LYL1_NEIGHBO…	3D-structure;Alternativesplicing;Completeproteome;Cytoplasm;Lectin;Polymorphism;Referenceproteome;Repeat;Secreted		10	10	10	37.3	37.3	37.3	34.69	0	53.219	5140100000	3676400000	1463700000	O00182-3;O00182-2;O00182-6;O00182;O00182-5;O00182-4;Q3B8N2-2;Q6DKI2;Q3B8N2	O00182-3;O00182-2;O00182-6;O00182	Galectin-9	LGALS9	232
0.0295357	-0.404278	-0.00125603	-0.0134154	-0.566729	-0.896739	0.246898	-0.19584	0.217212	-0.15959	-0.551213	0.394178	0.162481	-0.191937	-0.464944	-0.612419	-0.405468	0.197108	0.976462	-0.0134154	-0.191937	-0.178521	0.238615	anatomical structure development;biological adhesion;biological regulation;blood coagulation;brain development;carbohydrate transport;cell activation;cell activation involved in immune response;cell adhesion;cell-cell adhesion;cellular component assembly;cellular component organization;cellular component organization or biogenesis;cellular process;coagulation;developmental process;establishment o…	binding;protein binding;SNARE binding;syntaxin binding	apical plasma membrane;basolateral plasma membrane;cell part;cytoplasmic membrane-bounded vesicle;cytoplasmic part;cytoplasmic vesicle;cytosol;extracellular membrane-bounded organelle;extracellular organelle;extracellular region part;extracellular vesicular exosome;intracellular membrane-bounded organelle;intracellular organelle;intracellular part;membrane;membrane part;membrane-bounded organelle…	anatomical structure development;biological adhesion;biological regulation;carbohydrate transport;cell activation;cell adhesion;cellular component assembly;cellular component organization;cellular process;coagulation;developmental process;establishment of localization;exocytosis;hormone transport;immune system process;macromolecular complex assembly;membrane docking;membrane organization;multicel…	cell part;cytoplasmic membrane-bounded vesicle;cytosol;extracellular organelle;intracellular membrane-bounded organelle;intracellular organelle;membrane;organelle;plasma membrane;vesicle		Sec1	APPIERTO_RESPONSE_TO_FENRETINIDE_UP;BASAKI_YBX1_TARGETS_DN;BURTON_ADIPOGENESIS_9;BUYTAERT_PHOTODYNAMIC_THERAPY_STRESS_UP;CHEN_METABOLIC_SYNDROM_NETWORK;chr1p13;CUI_TCF21_TARGETS_2_DN;DACOSTA_UV_RESPONSE_VIA_ERCC3_DN;DIAZ_CHRONIC_MEYLOGENOUS_LEUKEMIA_UP;ENK_UV_RESPONSE_KERATINOCYTE_DN;FRASOR_RESPONSE_TO_SERM_OR_FULVESTRANT_UP;FULCHER_INFLAMMATORY_RESPONSE_LECTIN_VS_LPS_DN;GENTILE_UV_HIGH_DOSE_DN;G…	Cellmembrane;Completeproteome;Cytoplasm;Membrane;Phosphoprotein;Polymorphism;Proteintransport;Referenceproteome;Transport		18	18	18	40	40	40	67.764	0	68.865	2161000000	1338300000	822730000	O00186	O00186	Syntaxin-binding protein 3	STXBP3	233
-0.629146	0.559541	0.299614	0.161621	0.086013	-0.498304	-0.0786529	0.431422	-0.915995	0.814708	0.287437	0.0950924	-0.214362	0.213924	0.615832	0.802074	0.208928	-0.389491	0.14745	0.086013	0.213924	0.127911	0.291401							SMAP		Acetylation;Completeproteome;Phosphoprotein;Referenceproteome		7	7	7	41	41	41	20.332	0	323.31	1526700000	947830000	578850000	O00193	O00193	Small acidic protein	SMAP	234
3.0805	0.216584	2.31248	NaN	0.91312	NaN	NaN	2.72781	NaN	NaN	-1.41632	NaN	1.46781	2.86252	NaN	NaN	0.0646794	0.749423	0.256582	2.31248	0.749423	-1.56306	5.79159e-11	biological regulation;cellular process;cellular response to stimulus;establishment of localization;establishment of localization in cell;establishment of melanosome localization;establishment of organelle localization;establishment of pigment granule localization;establishment of protein localization;establishment of vesicle localization;intracellular protein transport;intracellular signal transd…	binding;catalytic activity;cytoskeletal protein binding;GDP binding;GTP binding;GTPase activity;guanyl nucleotide binding;guanyl ribonucleotide binding;hydrolase activity;hydrolase activity, acting on acid anhydrides;hydrolase activity, acting on acid anhydrides, in phosphorus-containing anhydrides;myosin binding;myosin V binding;nucleoside-triphosphatase activity;nucleotide binding;protein bindi…	apical plasma membrane;cell part;clathrin-coated vesicle;coated vesicle;cytoplasmic membrane-bounded vesicle;cytoplasmic part;cytoplasmic vesicle;cytoplasmic vesicle membrane;cytoplasmic vesicle part;endosomal part;endosome membrane;extracellular membrane-bounded organelle;extracellular organelle;extracellular region part;extracellular vesicular exosome;Golgi apparatus part;Golgi stack;Golgi-asso…	biological regulation;cellular process;establishment of localization;membrane docking;metabolic process;protein transport;regulation of transport;response to stimulus;secretion;signal transduction;transport;vesicle-mediated transport	cell part;cytoplasmic membrane-bounded vesicle;extracellular organelle;intracellular membrane-bounded organelle;intracellular organelle;membrane;organelle;vesicle	Pancreatic secretion	Ras	BOSCO_ALLERGEN_INDUCED_TH2_ASSOCIATED_MODULE;BROWN_MYELOID_CELL_DEVELOPMENT_DN;BROWNE_HCMV_INFECTION_14HR_DN;CHANDRAN_METASTASIS_DN;CHARAFE_BREAST_CANCER_LUMINAL_VS_MESENCHYMAL_UP;CHIANG_LIVER_CANCER_SUBCLASS_CTNNB1_DN;CHICAS_RB1_TARGETS_SENESCENT;chr18q21;CHYLA_CBFA2T3_TARGETS_UP;CREIGHTON_ENDOCRINE_THERAPY_RESISTANCE_5;CRX_NRL_DN.V1_DN;DURAND_STROMA_MAX_DN;DUTERTRE_ESTRADIOL_RESPONSE_24HR_DN;DU…	3D-structure;Acetylation;Completeproteome;Directproteinsequencing;Disulfidebond;GTP-binding;Lipoprotein;Membrane;Methylation;Nucleotide-binding;Polymorphism;Prenylation;Referenceproteome		13	11	11	60.6	52.3	52.3	24.608	0	39.343	900800000	581190000	319610000	O00194	O00194	Ras-related protein Rab-27B	RAB27B	235
-0.0231322	-0.510465	0.256433	0.320717	-0.379498	-0.160866	-0.54198	-0.0978046	0.354698	-0.167993	0.0283915	-0.0264983	-0.283719	-0.0534124	-0.0175303	-0.441622	-0.168176	0.20342	0.90424	-0.0978046	-0.0534124	0.0443922	0.417229	anterograde axon cargo transport;anterograde synaptic vesicle transport;antigen processing and presentation;antigen processing and presentation of exogenous antigen;antigen processing and presentation of lipid antigen via MHC class Ib;antigen processing and presentation via MHC class Ib;antigen processing and presentation, exogenous lipid antigen via MHC class Ib;axon cargo transport;biological r…	binding;enzyme binding;GTP-dependent protein binding;phosphatase binding;protein binding;protein phosphatase binding	AP-3 adaptor complex;AP-type membrane coat adaptor complex;cell part;clathrin coated vesicle membrane;coated vesicle membrane;cytoplasmic part;cytoplasmic vesicle membrane;cytoplasmic vesicle part;Golgi apparatus;intracellular membrane-bounded organelle;intracellular organelle;intracellular organelle part;intracellular part;lysosomal membrane;macromolecular complex;membrane;membrane part;membrane…	biological regulation;cellular component movement;cellular component organization;cellular process;coagulation;cytoskeleton-dependent intracellular transport;establishment of localization;immune system process;multicellular organismal process;organelle organization;pigment granule organization;protein targeting;protein transport;regulation of body fluid levels;transport;vacuolar transport;vesicle…	AP-type membrane coat adaptor complex;cell part;Golgi apparatus;intracellular membrane-bounded organelle;intracellular organelle;macromolecular complex;membrane;organelle;protein complex	Lysosome	Adaptin_N;AP3B1_C;SEEEED	ACCAAAG,MIR-9;ACEVEDO_LIVER_TUMOR_VS_NORMAL_ADJACENT_TISSUE_UP;ATCATGA,MIR-433;BAELDE_DIABETIC_NEPHROPATHY_DN;BENPORATH_NANOG_TARGETS;BENPORATH_SOX2_TARGETS;BORCZUK_MALIGNANT_MESOTHELIOMA_UP;CELLULAR_LOCALIZATION;chr5q14;CYCLIN_D1_UP.V1_DN;CYTOPLASM;CYTOPLASMIC_PART;DACOSTA_UV_RESPONSE_VIA_ERCC3_DN;DIAZ_CHRONIC_MEYLOGENOUS_LEUKEMIA_UP;ESTABLISHMENT_OF_CELLULAR_LOCALIZATION;ESTABLISHMENT_OF_LOCALI…	Albinism;Alternativesplicing;Completeproteome;Cytoplasmicvesicle;Diseasemutation;Golgiapparatus;Hermansky-Pudlaksyndrome;Membrane;Phosphoprotein;Proteintransport;Referenceproteome;Transport	AP3 adapter complex;AP3-BLOC1 complex	39	39	34	41.8	41.8	37.1	116.19	0	191.16	5292100000	3175100000	2117000000	O00203-3;O00203;Q13367;Q13367-4	O00203-3;O00203	AP-3 complex subunit beta-1	AP3B1	236
-0.355882	-0.452136	0.60364	0.219988	-0.694308	-0.626101	-0.572878	0.0679887	-0.727468	-0.147655	-0.703703	0.0378776	-0.606919	-0.162228	-0.522068	-0.185745	NaN	-0.31626	0.812534	-0.452136	-0.251003	0.201133	0.198316	B cell activation;B cell activation involved in immune response;B cell differentiation;biological regulation;cell activation;cell activation involved in immune response;cell differentiation;cellular developmental process;cellular process;developmental process;immune effector process;immune system process;leukocyte activation;leukocyte activation involved in immune response;leukocyte differentiati…	binding;carbohydrate binding	cell part;cytoplasm;extracellular membrane-bounded organelle;extracellular organelle;extracellular region part;extracellular space;extracellular vesicular exosome;intracellular part;membrane;membrane-bounded organelle;membrane-bounded vesicle;organelle;vesicle	biological regulation;cell activation;cell differentiation;cellular process;developmental process;immune system process	cell part;cytoplasm;extracellular organelle;extracellular space;membrane;organelle;vesicle		Gal-bind_lectin	ASTIER_INTEGRIN_SIGNALING;BASAKI_YBX1_TARGETS_DN;BENPORATH_ES_1;BENPORATH_PROLIFERATION;BILD_HRAS_ONCOGENIC_SIGNATURE;BLALOCK_ALZHEIMERS_DISEASE_DN;BLALOCK_ALZHEIMERS_DISEASE_INCIPIENT_DN;BOYAULT_LIVER_CANCER_SUBCLASS_G6_UP;BRUINS_UVC_RESPONSE_LATE;BRUINS_UVC_RESPONSE_VIA_TP53_GROUP_B;CARBOHYDRATE_BINDING;CASORELLI_ACUTE_PROMYELOCYTIC_LEUKEMIA_DN;chr1q43;COLINA_TARGETS_OF_4EBP1_AND_4EBP2;CONCANNO…	3D-structure;Alternativesplicing;Completeproteome;Cytoplasm;Lectin;Polymorphism;Referenceproteome;Repeat		6	6	6	20.8	20.8	20.8	35.808	0	9.3019	331920000	185590000	146330000	O00214;O00214-2	O00214;O00214-2	Galectin-8	LGALS8	238
0.986556	0.71029	-0.134326	0.103239	0.185317	0.812976	0.126576	0.0410853	0.89719	0.125693	0.311592	0.213123	0.484432	0.241681	0.481165	0.345713	0.184756	0.730501	0.673668	0.185317	0.311592	0.126275	0.293691	cellular component assembly;cellular component assembly at cellular level;cellular component biogenesis;cellular component organization;cellular component organization at cellular level;cellular component organization or biogenesis;cellular component organization or biogenesis at cellular level;cellular macromolecular complex assembly;cellular macromolecular complex subunit organization;cellular …	4 iron, 4 sulfur cluster binding;binding;catalytic activity;cation binding;ion binding;iron-sulfur cluster binding;metal cluster binding;metal ion binding;NADH dehydrogenase (quinone) activity;NADH dehydrogenase (ubiquinone) activity;NADH dehydrogenase activity;oxidoreductase activity;oxidoreductase activity, acting on NADH or NADPH;oxidoreductase activity, acting on NADH or NADPH, quinone or sim…	cell part;cytoplasmic part;intracellular membrane-bounded organelle;intracellular organelle;intracellular organelle part;intracellular part;macromolecular complex;membrane;membrane part;membrane-bounded organelle;mitochondrial inner membrane;mitochondrial membrane;mitochondrial membrane part;mitochondrial part;mitochondrial respiratory chain complex I;mitochondrion;NADH dehydrogenase complex;orga…	cellular component assembly;cellular component organization;cellular macromolecular complex assembly;cellular metabolic process;cellular process;generation of precursor metabolites and energy;macromolecular complex assembly;metabolic process;protein complex assembly;protein complex biogenesis;response to chemical stimulus;response to oxidative stress;response to stimulus;response to stress;small …	cell part;intracellular membrane-bounded organelle;intracellular organelle;macromolecular complex;membrane;mitochondrion;NADH dehydrogenase complex;organelle;protein complex	Alzheimer's disease;Huntington's disease;Oxidative phosphorylation;Parkinson's disease	Fer4_7	BOCHKIS_FOXA2_TARGETS;CELLULAR_COMPONENT_ASSEMBLY;CELLULAR_MACROMOLECULE_METABOLIC_PROCESS;CELLULAR_PROTEIN_COMPLEX_ASSEMBLY;CELLULAR_PROTEIN_METABOLIC_PROCESS;CHARAFE_BREAST_CANCER_LUMINAL_VS_BASAL_UP;CHOW_RASSF1_TARGETS_DN;chr11q13;CYTOPLASM;CYTOPLASMIC_PART;DELACROIX_RARG_BOUND_MEF;ELECTRON_CARRIER_ACTIVITY;ENK_UV_RESPONSE_KERATINOCYTE_UP;ENVELOPE;FLECHNER_BIOPSY_KIDNEY_TRANSPLANT_REJECTED_VS_…	4Fe-4S;Completeproteome;Diseasemutation;Electrontransport;Iron;Iron-sulfur;Leighsyndrome;Metal-binding;Mitochondrion;NAD;Oxidoreductase;Referenceproteome;Repeat;Respiratorychain;Transitpeptide;Transport;Ubiquinone	Respiratory chain complex I (holoenzyme), mitochondrial;Respiratory chain complex I (lambda subunit) mitochondrial	8	8	8	57.6	57.6	57.6	23.705	0	50.415	2945400000	1992700000	952680000	O00217	O00217	NADH dehydrogenase [ubiquinone] iron-sulfur protein 8, mitochondrial	NDUFS8	239
-0.691369	-0.872123	-0.507154	-0.448431	-0.785976	-0.764816	-0.654333	-0.470831	-1.14203	-0.7461	-0.440384	-0.782588	-0.65086	-0.556268	-0.528528	-0.749667	-0.300688	-0.83437	0.393472	-0.691369	-0.65086	0.0405089	0.423415	activation of immune response;activation of innate immune response;anaphase-promoting complex-dependent proteasomal ubiquitin-dependent protein catabolic process;antigen processing and presentation;antigen processing and presentation of exogenous antigen;antigen processing and presentation of exogenous peptide antigen;antigen processing and presentation of exogenous peptide antigen via MHC class …		cell part;cytoplasmic part;cytosol;extracellular membrane-bounded organelle;extracellular organelle;extracellular region part;extracellular vesicular exosome;intracellular membrane-bounded organelle;intracellular organelle;intracellular organelle part;intracellular part;macromolecular complex;membrane;membrane-bounded organelle;membrane-bounded vesicle;nuclear part;nucleoplasm;nucleus;organelle;o…	biological regulation;catabolic process;cell cycle;cell death;cell differentiation;cellular component assembly;cellular component organization;cellular macromolecular complex assembly;cellular metabolic process;cellular nitrogen compound metabolic process;cellular process;death;developmental process;immune system process;macromolecular complex assembly;macromolecule metabolic process;macromolecul…	cell part;cytosol;extracellular organelle;intracellular membrane-bounded organelle;intracellular organelle;macromolecular complex;membrane;nucleoplasm;nucleus;organelle;proteasome complex;protein complex;vesicle	Proteasome	PCI	AACTTT_UNKNOWN;ACTAYRNNNCCCR_UNKNOWN;ACTWSNACTNY_UNKNOWN;ASTON_MAJOR_DEPRESSIVE_DISORDER_DN;ATTCTTT,MIR-186;BENPORATH_CYCLING_GENES;BERENJENO_TRANSFORMED_BY_RHOA_UP;BIOCARTA_PROTEASOME_PATHWAY;BLALOCK_ALZHEIMERS_DISEASE_DN;BOYAULT_LIVER_CANCER_SUBCLASS_G3_UP;BROWNE_HCMV_INFECTION_48HR_UP;BYSTRYKH_HEMATOPOIESIS_STEM_CELL_QTL_TRANS;CATGTAA,MIR-496;chr17q12;CONCANNON_APOPTOSIS_BY_EPOXOMICIN_UP;CTTTG…	Acetylation;Alternativesplicing;Completeproteome;Cytoplasm;Directproteinsequencing;Nucleus;Phosphoprotein;Proteasome;Referenceproteome	PA700 complex;PA700-20S-PA28 complex	27	27	27	66.4	66.4	66.4	47.463	0	205.81	24528000000	13811000000	10717000000	O00231;O00231-2	O00231;O00231-2	26S proteasome non-ATPase regulatory subunit 11	PSMD11	240
-0.592369	-0.946058	-0.409544	-0.402357	-0.780472	-0.665103	-0.60036	-0.471956	-0.686814	-0.768603	-0.425213	-0.70462	-0.663308	-0.522784	-0.448311	-0.529515	-0.462593	-0.709672	0.635274	-0.60036	-0.529515	0.0708455	0.375707	activation of immune response;activation of innate immune response;anaphase-promoting complex-dependent proteasomal ubiquitin-dependent protein catabolic process;antigen processing and presentation;antigen processing and presentation of exogenous antigen;antigen processing and presentation of exogenous peptide antigen;antigen processing and presentation of exogenous peptide antigen via MHC class …		cell part;cytoplasmic part;cytosol;extracellular membrane-bounded organelle;extracellular organelle;extracellular region part;extracellular vesicular exosome;intracellular organelle part;intracellular part;macromolecular complex;membrane;membrane-bounded organelle;membrane-bounded vesicle;nuclear part;nucleoplasm;organelle;organelle part;proteasome accessory complex;proteasome complex;proteasome …	biological regulation;catabolic process;cell cycle;cell death;cellular metabolic process;cellular nitrogen compound metabolic process;cellular process;death;immune system process;macromolecule metabolic process;macromolecule modification;metabolic process;mitotic cell cycle;nitrogen compound metabolic process;primary metabolic process;protein metabolic process;protein modification by small protei…	cell part;cytosol;extracellular organelle;macromolecular complex;membrane;nucleoplasm;organelle;proteasome complex;protein complex;vesicle	Proteasome	PCI	AIYAR_COBRA1_TARGETS_DN;BIOCARTA_PROTEASOME_PATHWAY;BLALOCK_ALZHEIMERS_DISEASE_DN;BRUINS_UVC_RESPONSE_LATE;CHANG_CORE_SERUM_RESPONSE_UP;chr17q24;CHUANG_OXIDATIVE_STRESS_RESPONSE_UP;CONCANNON_APOPTOSIS_BY_EPOXOMICIN_UP;DELACROIX_RARG_BOUND_MEF;DIAZ_CHRONIC_MEYLOGENOUS_LEUKEMIA_UP;GACTGTT,MIR-212,MIR-132;GSE13484_12H_VS_3H_YF17D_VACCINE_STIM_PBMC_DN;GSE14000_TRANSLATED_RNA_VS_MRNA_DC_UP;GSE14308_TH…	Acetylation;Alternativesplicing;Completeproteome;Directproteinsequencing;Polymorphism;Proteasome;Referenceproteome	PA700 complex;PA700-20S-PA28 complex	28	28	28	64.5	64.5	64.5	52.904	0	215.9	6586100000	3286400000	3299700000	O00232;O00232-2	O00232;O00232-2	26S proteasome non-ATPase regulatory subunit 12	PSMD12	241
-0.448462	-0.153839	0.544675	0.592791	-0.836167	-0.0458472	0.434656	0.987585	0.0378395	-0.195149	0.328285	0.0474429	0.428689	-0.0346065	0.117016	0.0263328	0.360428	-0.246407	0.882405	0.0378395	0.0474429	0.0096034	0.473197	activation of immune response;activation of innate immune response;anaphase-promoting complex-dependent proteasomal ubiquitin-dependent protein catabolic process;antigen processing and presentation;antigen processing and presentation of exogenous antigen;antigen processing and presentation of exogenous peptide antigen;antigen processing and presentation of exogenous peptide antigen via MHC class …	bHLH transcription factor binding;binding;protein binding;protein binding transcription factor activity;transcription coactivator activity;transcription cofactor activity;transcription factor binding;transcription factor binding transcription factor activity	cell part;cytoplasm;cytoplasmic part;cytosol;intracellular membrane-bounded organelle;intracellular organelle;intracellular organelle part;intracellular part;macromolecular complex;membrane-bounded organelle;nuclear part;nucleoplasm;nucleus;organelle;organelle part;proteasome regulatory particle;protein complex	biological regulation;catabolic process;cell cycle;cell death;cellular component assembly;cellular component organization;cellular macromolecular complex assembly;cellular metabolic process;cellular nitrogen compound metabolic process;cellular process;death;immune system process;macromolecular complex assembly;macromolecule metabolic process;macromolecule modification;metabolic process;mitotic ce…	cell part;cytoplasm;cytosol;intracellular membrane-bounded organelle;intracellular organelle;macromolecular complex;nucleoplasm;nucleus;organelle;protein complex		PDZ_2	BENPORATH_NANOG_TARGETS;BYSTRYKH_HEMATOPOIESIS_STEM_CELL_QTL_TRANS;chr12q24;ENK_UV_RESPONSE_KERATINOCYTE_UP;FLECHNER_PBL_KIDNEY_TRANSPLANT_OK_VS_DONOR_UP;GNF2_CDC27;GNF2_MAP2K3;GRABARCZYK_BCL11B_TARGETS_DN;GSE10239_NAIVE_VS_KLRG1INT_EFF_CD8_TCELL_DN;GSE14308_TH17_VS_INDUCED_TREG_DN;GSE14308_TH2_VS_TH17_UP;GSE1448_CTRL_VS_ANTI_VALPHA2_DP_THYMOCYTE_DN;GSE1460_DP_THYMOCYTE_VS_NAIVE_CD4_TCELL_ADULT_B…	Alternativesplicing;Chaperone;Completeproteome;Phosphoprotein;Polymorphism;Referenceproteome	PA700 complex;PA700-20S-PA28 complex	7	7	7	35.9	35.9	35.9	24.682	0	99.202	1675600000	1066000000	609550000	O00233;O00233-2;O00233-3	O00233;O00233-2	26S proteasome non-ATPase regulatory subunit 9	PSMD9	242
NaN	NaN	1.00735	1.01992	NaN	-0.346253	NaN	-0.199448	2.03576	NaN	0.678245	1.50201	NaN	-0.692125	0.405239	NaN	NaN	0.755601	0.767218	1.00735	0.678245	-0.329103	0.0910389	biological regulation;cell surface receptor linked signaling pathway;cellular process;cellular response to stimulus;defense response;immune response;immune system process;innate immune response;regulation of biological process;regulation of cellular process;response to stimulus;response to stress;signal transduction		cell part;extracellular membrane-bounded organelle;extracellular organelle;extracellular region part;extracellular vesicular exosome;integral to membrane;integral to plasma membrane;intrinsic to membrane;intrinsic to plasma membrane;membrane;membrane part;membrane-bounded organelle;membrane-bounded vesicle;organelle;plasma membrane;plasma membrane part;vesicle	biological regulation;cellular process;immune system process;response to stimulus;response to stress;signal transduction	cell part;extracellular organelle;membrane;organelle;plasma membrane;vesicle	Osteoclast differentiation	C1-set;V-set	CAR_MLANA;CELL_SURFACE_RECEPTOR_LINKED_SIGNAL_TRANSDUCTION_GO_0007166;chr20p13;DCA_UP.V1_DN;GCM_ATM;GCM_FANCC;GCM_FCGR2B;GCM_HMGA2;GCM_LTK;GCM_PRKCG;GCM_RING1;GCM_SMARCD1;GRADE_COLON_AND_RECTAL_CANCER_DN;GSE11057_CD4_CENT_MEM_VS_PBMC_DN;GSE11057_PBMC_VS_MEM_CD4_TCELL_UP;GSE19825_NAIVE_VS_IL2RALOW_DAY3_EFF_CD8_TCELL_UP;GSE29618_BCELL_VS_MONOCYTE_DAY7_FLU_VACCINE_DN;GSE29618_LAIV_VS_TIV_FLU_VACCINE…	3D-structure;Alternativesplicing;Completeproteome;Disulfidebond;Glycoprotein;Immunoglobulindomain;Membrane;Polymorphism;Referenceproteome;Repeat;Signal;Transmembrane;Transmembranehelix		10	7	7	36.7	29.9	29.9	43.211	0	43.467	250000000	176860000	73135000	O00241;O00241-2	O00241;O00241-2	Signal-regulatory protein beta-1	SIRPB1	243
-1.7207	-0.256213	0.12231	0.417142	-0.980865	-0.630297	-0.71654	-0.103139	-2.20874	-0.126785	0.0205021	-0.00848352	-0.970921	-0.786855	-0.0308481	-0.263019	0.0616852	-2.43502	0.670277	-0.630297	-0.126785	0.503512	0.0187747	biological regulation;cation homeostasis;cation transport;cellular cation homeostasis;cellular chemical homeostasis;cellular copper ion homeostasis;cellular homeostasis;cellular ion homeostasis;cellular process;chemical homeostasis;copper ion homeostasis;copper ion transport;establishment of localization;establishment of localization in cell;homeostatic process;intracellular copper ion transport;…	binding;cation binding;cation transmembrane transporter activity;copper chaperone activity;copper ion binding;copper ion transmembrane transporter activity;copper-dependent protein binding;inorganic cation transmembrane transporter activity;ion binding;ion transmembrane transporter activity;metal ion binding;metal ion transmembrane transporter activity;metallochaperone activity;protein binding;su…	cell part;cytoplasmic part;cytosol;intracellular part	biological regulation;cellular homeostasis;cellular ion homeostasis;cellular process;establishment of localization;homeostatic process;ion transport;response to chemical stimulus;response to oxidative stress;response to stimulus;response to stress;transport	cell part;cytosol	Mineral absorption	HMA	BILBAN_B_CLL_LPL_UP;BRUECKNER_TARGETS_OF_MIRLET7A3_DN;BRUINS_UVC_RESPONSE_LATE;CAGGTG_V$E12_Q6;CATION_BINDING;CATION_HOMEOSTASIS;CATION_TRANSPORT;CELLULAR_CATION_HOMEOSTASIS;CELLULAR_HOMEOSTASIS;CHEMICAL_HOMEOSTASIS;CHICAS_RB1_TARGETS_LOW_SERUM;chr5q32;CHUNG_BLISTER_CYTOTOXICITY_UP;COPPER_ION_BINDING;CYTOPLASM;CYTOPLASMIC_PART;CYTOSOL;ESTABLISHMENT_OF_LOCALIZATION;GRAESSMANN_APOPTOSIS_BY_DOXORUBI…	3D-structure;Acetylation;Chaperone;Completeproteome;Copper;Coppertransport;Iontransport;Metal-binding;Referenceproteome;Transport		4	4	4	47.1	47.1	47.1	7.4016	0	21.939	784660000	432750000	351910000	O00244	O00244	Copper transport protein ATOX1	ATOX1	244
0.594842	0.257765	-0.60883	-0.344416	1.16754	0.61874	0.0254832	0.356102	0.870199	0.258572	1.03881	1.10914	0.267492	0.0426952	0.639731	0.649158	0.559341	0.692272	0.268102	0.356102	0.639731	0.283629	0.118247	anatomical structure development;anatomical structure morphogenesis;biological regulation;biosynthetic process;brain development;cell cycle arrest;cell cycle process;cell development;cell fate commitment;cell surface receptor linked signaling pathway;cellular biosynthetic process;cellular component organization;cellular component organization at cellular level;cellular component organization or b…	binding;binding, bridging;chromatin binding;DNA binding;DNA secondary structure binding;double-stranded DNA binding;four-way junction DNA binding;nucleic acid binding;protein binding;protein binding, bridging;protein N-terminus binding;regulatory region DNA binding;regulatory region nucleic acid binding;R-SMAD binding;sequence-specific DNA binding;SMAD binding;structure-specific DNA binding;trans…	cell division site part;cell part;chromatin;chromosomal part;cleavage furrow;cytoplasm;cytoplasmic part;cytosol;histone methyltransferase complex;intracellular membrane-bounded organelle;intracellular organelle;intracellular organelle part;intracellular part;macromolecular complex;membrane-bounded organelle;methyltransferase complex;nuclear matrix;nuclear part;nucleoplasm;nucleoplasm part;nucleus…	anatomical structure development;anatomical structure morphogenesis;biological regulation;biosynthetic process;cell development;cellular component organization;cellular metabolic process;cellular nitrogen compound metabolic process;cellular process;chromatin modification;chromatin organization;chromosome organization;developmental process;DNA metabolic process;DNA repair;histone modification;home…	cell part;cytoplasm;cytosol;histone methyltransferase complex;intracellular membrane-bounded organelle;intracellular organelle;macromolecular complex;nucleoplasm;nucleus;organelle;protein complex		Menin	BIOPOLYMER_METABOLIC_PROCESS;chr11q13;CTGAGCC,MIR-24;CYTOPLASM;CYTOPLASMIC_PART;CYTOSOL;DANG_BOUND_BY_MYC;DEBIASI_APOPTOSIS_BY_REOVIRUS_INFECTION_DN;DIAZ_CHRONIC_MEYLOGENOUS_LEUKEMIA_UP;FERNANDEZ_BOUND_BY_MYC;GATTGGY_V$NFY_Q6_01;GCM_HDAC1;GCM_TPR;GGGAGGRR_V$MAZ_Q6;GRESHOCK_CANCER_COPY_NUMBER_UP;GSE10325_BCELL_VS_MYELOID_UP;GSE12845_NAIVE_VS_DARKZONE_GC_TONSIL_BCELL_DN;GSE12845_PRE_GC_VS_DARKZONE_…	3D-structure;Alternativesplicing;Chromatinregulator;Completeproteome;Diseasemutation;DNA-binding;Nucleus;Phosphoprotein;Polymorphism;Referenceproteome;Repressor;Transcription;Transcriptionregulation	Menin-associated histone methyltransferase complex;MLL-HCF complex	12	12	12	31.1	31.1	31.1	63.747	0	67.258	405020000	274240000	130780000	O00255-3;O00255-2;O00255	O00255-3;O00255-2;O00255	Menin	MEN1	245
0.584957	0.0803074	-0.353449	-0.215442	-0.700654	-0.230349	-0.337573	0.0632268	0.384618	0.583883	0.165138	0.109723	0.114044	-0.434776	-0.0564813	0.080391	-0.329248	0.22619	0.442548	-0.215442	0.109723	0.325164	0.0880221	axon guidance;chemotaxis;locomotion;response to chemical stimulus;response to external stimulus;response to stimulus;taxis	binding;cation binding;heme binding;ion binding;iron ion binding;lipid binding;metal ion binding;steroid binding;tetrapyrrole binding;transition metal ion binding	cell part;cytoplasmic part;endoplasmic reticulum;endoplasmic reticulum membrane;endoplasmic reticulum part;extracellular membrane-bounded organelle;extracellular organelle;extracellular region part;extracellular vesicular exosome;integral to membrane;intracellular membrane-bounded organelle;intracellular non-membrane-bounded organelle;intracellular organelle;intracellular organelle part;intracell…	locomotion;response to chemical stimulus;response to external stimulus;response to stimulus	cell part;endoplasmic reticulum;extracellular organelle;intracellular membrane-bounded organelle;intracellular non-membrane-bounded organelle;intracellular organelle;membrane;nucleolus;organelle;vesicle		Cyt-b5	AACTTT_UNKNOWN;BLALOCK_ALZHEIMERS_DISEASE_DN;BORCZUK_MALIGNANT_MESOTHELIOMA_UP;BROWN_MYELOID_CELL_DEVELOPMENT_DN;BRUINS_UVC_RESPONSE_VIA_TP53_GROUP_A;BUYTAERT_PHOTODYNAMIC_THERAPY_STRESS_DN;CAGGTA_V$AREB6_01;CELL_SURFACE;CHIARADONNA_NEOPLASTIC_TRANSFORMATION_CDC25_UP;chrxq22;CREIGHTON_ENDOCRINE_THERAPY_RESISTANCE_3;CROMER_METASTASIS_UP;DAIRKEE_TERT_TARGETS_UP;DAVICIONI_MOLECULAR_ARMS_VS_ERMS_DN;D…	Alternativesplicing;Completeproteome;Directproteinsequencing;Endoplasmicreticulum;Lipid-binding;Membrane;Microsome;Phosphoprotein;Receptor;Referenceproteome;Steroid-binding;Transmembrane;Transmembranehelix	PGRMC1-SCAP complex	13	13	12	61	61	56.4	21.671	0	164.72	1952600000	1189700000	762840000	O00264;O00264-2	O00264;O00264-2	Membrane-associated progesterone receptor component 1	PGRMC1	247
0.142684	-0.109064	-0.227873	-0.20568	0.161703	0.0387454	0.113348	0.0415474	0.19465	0.324493	0.0451598	-0.161523	0.0915605	-0.0808501	-0.149511	0.0451407	-0.0160704	0.295765	0.735279	0.0415474	0.0451407	0.00359329	0.482951	biological regulation;biosynthetic process;cell cycle;cellular biosynthetic process;cellular component organization;cellular component organization at cellular level;cellular component organization or biogenesis;cellular component organization or biogenesis at cellular level;cellular macromolecule biosynthetic process;cellular macromolecule metabolic process;cellular metabolic process;cellular ni…	binding;chromatin binding;enzyme binding;protein binding;protein dimerization activity;protein heterodimerization activity	cell part;DSIF complex;intracellular membrane-bounded organelle;intracellular organelle;intracellular organelle part;intracellular part;macromolecular complex;membrane-bounded organelle;nuclear part;nucleoplasm;nucleoplasm part;nucleus;organelle;organelle part;protein complex;transcription elongation factor complex	biological regulation;biosynthetic process;cell cycle;cellular component organization;cellular metabolic process;cellular nitrogen compound metabolic process;cellular process;chromatin modification;chromatin organization;chromosome organization;macromolecule metabolic process;metabolic process;mRNA metabolic process;mRNA processing;nitrogen compound metabolic process;nucleobase-containing compoun…	cell part;intracellular membrane-bounded organelle;intracellular organelle;macromolecular complex;nucleoplasm;nucleus;organelle;protein complex;transcription elongation factor complex		KOW;Spt5_N;Spt5-NGN	BARRIER_CANCER_RELAPSE_NORMAL_SAMPLE_DN;BENPORATH_ES_CORE_NINE_CORRELATED;BENPORATH_MYC_MAX_TARGETS;BIOPOLYMER_METABOLIC_PROCESS;CAGCTG_V$AP4_Q5;chr19q13;CYCLIN_D1_KE_.V1_UP;CYCLIN_D1_UP.V1_UP;DANG_BOUND_BY_MYC;ENZYME_BINDING;GSE12845_IGD_POS_BLOOD_VS_DARKZONE_GC_TONSIL_BCELL_DN;GSE12845_IGD_POS_BLOOD_VS_NAIVE_TONSIL_BCELL_DN;GSE13485_CTRL_VS_DAY21_YF17D_VACCINE_PBMC_UP;GSE13485_DAY1_VS_DAY21_YF1…	3D-structure;Acetylation;Activator;Alternativesplicing;Completeproteome;Directproteinsequencing;Methylation;Nucleus;Phosphoprotein;Referenceproteome;Repeat;Repressor;Transcription;Transcriptionregulation	DSIF complex (DRB sensitivity-inducing factor complex);RNA pol II containing coactivator complex Tat-SF;Transcription elongation factor complex (SUPT5H, CDK9, CCNT1)	36	36	36	41.6	41.6	41.6	120.5	0	323.31	6992700000	4300600000	2692100000	O00267-2;O00267	O00267-2;O00267	Transcription elongation factor SPT5	SUPT5H	248
0.574272	0.540694	0.110844	0.218188	0.74405	-0.096874	0.458839	0.536767	0.192759	0.689881	0.00560535	0.355904	0.394683	0.371863	0.506119	0.721294	NaN	0.51469	0.512755	0.458839	0.450401	-0.00843844	0.497455	biological regulation;biosynthetic process;cellular biosynthetic process;cellular macromolecule biosynthetic process;cellular macromolecule metabolic process;cellular metabolic process;cellular nitrogen compound metabolic process;cellular process;gene expression;macromolecule biosynthetic process;macromolecule metabolic process;metabolic process;nitrogen compound metabolic process;nucleic acid me…	binding;DNA binding;nucleic acid binding;nucleic acid binding transcription factor activity;protein binding transcription factor activity;sequence-specific DNA binding transcription factor activity;transcription coactivator activity;transcription cofactor activity;transcription factor binding transcription factor activity	cell part;cytoplasm;histone acetyltransferase complex;histone methyltransferase complex;intracellular organelle part;intracellular part;macromolecular complex;methyltransferase complex;MLL1 complex;nuclear part;nucleoplasm;nucleoplasm part;organelle part;protein complex;SAGA-type complex;transcription factor complex;transcription factor TFIID complex;transcription factor TFTC complex	biological regulation;biosynthetic process;cellular metabolic process;cellular nitrogen compound metabolic process;cellular process;macromolecule metabolic process;metabolic process;nitrogen compound metabolic process;nucleobase-containing compound metabolic process;primary metabolic process;rhythmic process;RNA metabolic process;transcription elongation, DNA-dependent;transcription from RNA poly…	cell part;cytoplasm;histone methyltransferase complex;macromolecular complex;nucleoplasm;protein complex;transcription factor complex	Basal transcription factors;Huntington's disease	TAF4;TAFH	AAGCCAT,MIR-135A,MIR-135B;AGUIRRE_PANCREATIC_CANCER_COPY_NUMBER_UP;BILD_E2F3_ONCOGENIC_SIGNATURE;BROWNE_HCMV_INFECTION_10HR_UP;CACTGTG,MIR-128A,MIR-128B;CAGTATT,MIR-200B,MIR-200C,MIR-429;CATGTAA,MIR-496;chr20q13;CTGTTAC,MIR-194;CTTTGTA,MIR-524;DACOSTA_UV_RESPONSE_VIA_ERCC3_COMMON_DN;DACOSTA_UV_RESPONSE_VIA_ERCC3_DN;DNA_DIRECTED_RNA_POLYMERASEII_HOLOENZYME;GACTGTT,MIR-212,MIR-132;GAGACTG,MIR-452;G…	3D-structure;Completeproteome;Directproteinsequencing;Host-virusinteraction;Nucleus;Polymorphism;Referenceproteome;Transcription;Transcriptionregulation	DA complex;DAB complex;MLL1-WDR5 complex;TAF4-TAF12 subcomplex of TFIID complex;TFIID complex;TFIID complex, B-cell specific;TFIID subcomplex;TFIID-beta complex;TFTC complex (TATA-binding protein-free TAF-II-containing complex)	14	14	13	22.9	22.9	21.7	110.11	0	75.728	406780000	264360000	142420000	O00268	O00268	Transcription initiation factor TFIID subunit 4	TAF4	249
-0.961153	0.26746	0.152403	0.322361	0.139509	0.0998387	0.78566	0.2069	-1.48289	0.883298	0.385255	0.00828017	-0.471569	0.00830807	0.0803592	0.704633	0.603767	-0.796944	0.495924	0.152403	0.0803592	-0.0720435	0.393659	apoptosis;biological regulation;catabolic process;cell death;cellular catabolic process;cellular component disassembly;cellular component disassembly at cellular level;cellular component disassembly involved in apoptosis;cellular component organization;cellular component organization at cellular level;cellular component organization or biogenesis;cellular component organization or biogenesis at c…		cell part;chromatin;chromosomal part;cytoplasm;cytoplasmic part;cytosol;intracellular membrane-bounded organelle;intracellular organelle;intracellular organelle part;intracellular part;membrane-bounded organelle;nuclear chromatin;nuclear chromosome part;nuclear part;nucleoplasm;nucleus;organelle;organelle part	biological regulation;catabolic process;cell death;cellular component disassembly;cellular component organization;cellular metabolic process;cellular nitrogen compound metabolic process;cellular process;death;DNA metabolic process;macromolecule metabolic process;metabolic process;nitrogen compound metabolic process;nucleobase-containing compound metabolic process;primary metabolic process	cell part;cytoplasm;cytosol;intracellular membrane-bounded organelle;intracellular organelle;nucleoplasm;nucleus;organelle	Apoptosis	CIDE-N;DFF-C	ACTAYRNNNCCCR_UNKNOWN;APOPTOSIS_GO;APOPTOTIC_NUCLEAR_CHANGES;APOPTOTIC_PROGRAM;ASTON_MAJOR_DEPRESSIVE_DISORDER_DN;BIOCARTA_CASPASE_PATHWAY;BIOCARTA_DEATH_PATHWAY;BIOCARTA_DNAFRAGMENT_PATHWAY;BIOCARTA_FAS_PATHWAY;BIOCARTA_HIVNEF_PATHWAY;BIOCARTA_MITOCHONDRIA_PATHWAY;BIOCARTA_SET_PATHWAY;BIOCARTA_TNFR1_PATHWAY;BIOPOLYMER_CATABOLIC_PROCESS;BIOPOLYMER_METABOLIC_PROCESS;BROWNE_HCMV_INFECTION_1HR_DN;BR…	3D-structure;Acetylation;Alternativesplicing;Apoptosis;Completeproteome;Cytoplasm;Directproteinsequencing;Phosphoprotein;Referenceproteome		15	15	15	48	48	48	36.521	0	104.53	2067900000	1385200000	682630000	O00273;O00273-2	O00273;O00273-2	DNA fragmentation factor subunit alpha	DFFA	250
0.439868	0.355555	0.637023	1.1394	0.348043	-1.22591	-1.51504	-0.30819	-0.874978	-0.391271	0.939719	1.01759	0.561941	1.23603	-0.419039	0.325384	-1.3605	0.800942	0.337859	0.348043	0.561941	0.213898	0.184149	activation of caspase activity;apoptosis;biological regulation;biosynthetic process;cell death;cell differentiation;cellular biosynthetic process;cellular component assembly;cellular component assembly at cellular level;cellular component organization;cellular component organization at cellular level;cellular component organization or biogenesis;cellular component organization or biogenesis at ce…	binding;clathrin binding;lipid binding;phosphatidylinositol binding;phospholipid binding;protein binding;structural constituent of cytoskeleton;structural molecule activity	cell part;clathrin coated vesicle membrane;clathrin-coated vesicle;coated vesicle;coated vesicle membrane;cytoplasm;cytoplasmic membrane-bounded vesicle;cytoplasmic part;cytoplasmic vesicle;cytoplasmic vesicle membrane;cytoplasmic vesicle part;cytoskeleton;Golgi apparatus;intracellular membrane-bounded organelle;intracellular non-membrane-bounded organelle;intracellular organelle;intracellular or…	biological regulation;biosynthetic process;cell death;cell differentiation;cellular component assembly;cellular component organization;cellular macromolecular complex assembly;cellular membrane organization;cellular metabolic process;cellular nitrogen compound metabolic process;cellular process;death;developmental process;endocytosis;establishment of localization;macromolecular complex assembly;m…	cell part;cytoplasm;cytoplasmic membrane-bounded vesicle;cytoskeleton;Golgi apparatus;intracellular membrane-bounded organelle;intracellular non-membrane-bounded organelle;intracellular organelle;membrane;nucleus;organelle;vesicle	Huntington's disease	ANTH;I_LWEQ	ACTGTGA,MIR-27A,MIR-27B;AMUNDSON_POOR_SURVIVAL_AFTER_GAMMA_RADIATION_2G;APOPTOSIS_GO;APOPTOTIC_PROGRAM;BERNARD_PPAPDC1B_TARGETS_DN;BOYAULT_LIVER_CANCER_SUBCLASS_G2;CACTGTG,MIR-128A,MIR-128B;CAGCTG_V$AP4_Q5;CAIRO_HEPATOBLASTOMA_UP;CASPASE_ACTIVATION;CCGNMNNTNACG_UNKNOWN;CELL_DEVELOPMENT;CELL_FRACTION;CELLULAR_COMPONENT_ASSEMBLY;CHICAS_RB1_TARGETS_SENESCENT;chr7q11;CSR_LATE_UP.V1_UP;CTIP_DN.V1_DN;C…	3D-structure;Actin-binding;Activator;Alternativesplicing;Apoptosis;Chromosomalrearrangement;Coiledcoil;Completeproteome;Cytoplasm;Cytoplasmicvesicle;Differentiation;Endocytosis;Membrane;Neurodegeneration;Nucleus;Phosphoprotein;Polymorphism;Referenceproteome;Transcription;Transcriptionregulation		23	23	23	31.2	31.2	31.2	110.66	0	225.81	2422600000	1663100000	759530000	O00291-3;O00291-4;O00291;O75146-2;O75146	O00291-3;O00291-4;O00291	Huntingtin-interacting protein 1	HIP1	252
-1.61641	-0.34875	0.25899	0.267085	-1.28416	-0.886423	-0.486664	0.211718	-1.16226	-0.0316916	0.274548	-0.0317698	-0.937276	-0.289372	-0.131405	-0.694605	0.0375349	-1.64706	0.578785	-0.486664	-0.131405	0.355259	0.0700174	anion transport;biological adhesion;biological regulation;cell adhesion;cell-cell adhesion;cellular chemical homeostasis;cellular homeostasis;cellular ion homeostasis;cellular process;cellular response to stimulus;chemical homeostasis;chloride transport;establishment of localization;homeostatic process;homotypic cell-cell adhesion;inorganic anion transport;ion homeostasis;ion transport;platelet a…	anion channel activity;anion transmembrane transporter activity;channel activity;chloride channel activity;gated channel activity;ion channel activity;ion transmembrane transporter activity;passive transmembrane transporter activity;substrate-specific channel activity;substrate-specific transmembrane transporter activity;substrate-specific transporter activity;transmembrane transporter activity;t…	blood microparticle;brush border;cell part;cell projection;chloride channel complex;cytoplasm;cytoplasmic part;envelope;extracellular membrane-bounded organelle;extracellular organelle;extracellular region part;extracellular space;extracellular vesicular exosome;intracellular membrane-bounded organelle;intracellular organelle;intracellular organelle part;intracellular part;ion channel complex;mac…	biological adhesion;biological regulation;cell adhesion;cellular homeostasis;cellular ion homeostasis;cellular process;establishment of localization;homeostatic process;ion transport;regulation of cell cycle;response to stimulus;signal transduction;transport	brush border;cell part;cell projection;cytoplasm;extracellular organelle;extracellular space;intracellular membrane-bounded organelle;intracellular organelle;macromolecular complex;membrane;mitochondrion;nuclear envelope;nucleus;organelle;plasma membrane;protein complex;vesicle		GST_N_2	ACEVEDO_LIVER_CANCER_WITH_H3K9ME3_UP;ANION_TRANSPORT;BENPORATH_NANOG_TARGETS;BLALOCK_ALZHEIMERS_DISEASE_INCIPIENT_UP;BLALOCK_ALZHEIMERS_DISEASE_UP;BONOME_OVARIAN_CANCER_SURVIVAL_OPTIMAL_DEBULKING;BOYAULT_LIVER_CANCER_SUBCLASS_G3_UP;BRUSH_BORDER;CAIRO_HEPATOBLASTOMA_CLASSES_UP;CAIRO_HEPATOBLASTOMA_UP;CELL_FRACTION;CELL_PROJECTION;CHEN_METABOLIC_SYNDROM_NETWORK;chr6p22;CREIGHTON_ENDOCRINE_THERAPY_R…	3D-structure;Acetylation;Cellmembrane;Chloride;Chloridechannel;Completeproteome;Cytoplasm;Directproteinsequencing;Disulfidebond;Glutathionylation;Ionchannel;Iontransport;Membrane;Nucleus;Phosphoprotein;Referenceproteome;Transmembrane;Transmembranehelix;Transport;Voltage-gatedchannel		20	20	20	84.6	84.6	84.6	26.922	0	323.31	83367000000	48691000000	34676000000	O00299	O00299	Chloride intracellular channel protein 1	CLIC1	253
-0.363706	-0.783061	-0.439338	-0.528556	-0.221953	-0.38036	-0.273859	-0.559576	0.110435	-0.621453	-0.788496	-0.433298	-0.309908	-0.503781	-0.61516	-0.581438	-0.589155	-0.331138	0.151818	-0.38036	-0.581438	-0.201078	0.210646	biological regulation;biosynthetic process;cellular biosynthetic process;cellular component assembly;cellular component assembly at cellular level;cellular component organization;cellular component organization at cellular level;cellular component organization or biogenesis;cellular component organization or biogenesis at cellular level;cellular macromolecular complex assembly;cellular macromolec…	binding;catalytic activity;cysteine-type peptidase activity;hydrolase activity;nucleic acid binding;peptidase activity;peptidase activity, acting on L-amino acid peptides;RNA binding;small conjugating protein-specific protease activity;translation factor activity, nucleic acid binding;translation initiation factor activity;ubiquitin-specific protease activity	cell part;cytoplasmic part;cytosol;eukaryotic 43S preinitiation complex;eukaryotic 48S preinitiation complex;eukaryotic translation initiation factor 3 complex;intracellular part;macromolecular complex;membrane;protein complex;ribonucleoprotein complex;translation preinitiation complex	biological regulation;biosynthetic process;cellular component assembly;cellular component organization;cellular macromolecular complex assembly;cellular metabolic process;cellular process;macromolecular complex assembly;macromolecule metabolic process;macromolecule modification;metabolic process;primary metabolic process;protein metabolic process;protein modification by small protein conjugation …	cell part;cytosol;macromolecular complex;membrane;protein complex;ribonucleoprotein complex	RNA transport	JAB;MitMem_reg	ACEVEDO_LIVER_TUMOR_VS_NORMAL_ADJACENT_TISSUE_UP;ALCALA_APOPTOSIS;APPIERTO_RESPONSE_TO_FENRETINIDE_DN;BENPORATH_NANOG_TARGETS;BENPORATH_SOX2_TARGETS;BILANGES_SERUM_AND_RAPAMYCIN_SENSITIVE_GENES;BILANGES_SERUM_RESPONSE_TRANSLATION;BIOSYNTHETIC_PROCESS;CAIRO_HEPATOBLASTOMA_CLASSES_UP;CELLULAR_BIOSYNTHETIC_PROCESS;CELLULAR_COMPONENT_ASSEMBLY;CELLULAR_MACROMOLECULE_METABOLIC_PROCESS;CELLULAR_PROTEIN_…	3D-structure;Acetylation;Completeproteome;Cytoplasm;Hydrolase;Initiationfactor;Phosphoprotein;Polymorphism;Protease;Proteinbiosynthesis;Referenceproteome;Thiolprotease;Ublconjugationpathway	eIF3 complex (EIF3S6, EIF3S5, EIF3S4, EIF3S3, EIF3S6IP, EIF3S2, EIF3S9, EIF3S12, EIF3S10, EIF3S8, EIF3S1, EIF3S7);eIF3 complex (EIF3S6, EIF3S5, EIF3S4, EIF3S3, EIF3S6IP, EIF3S2, EIF3S9, EIF3S12, EIF3S10, EIF3S8, EIF3S1, EIF3S7, PCID1)	18	18	18	59.7	59.7	59.7	37.563	0	226.75	10988000000	5551300000	5436900000	O00303	O00303	Eukaryotic translation initiation factor 3 subunit F	EIF3F	254
-0.315237	-0.20005	-0.62764	NaN	-0.394447	0.270896	-0.214521	-0.435796	0.402159	NaN	-0.457131	-0.592536	-0.362026	-0.622465	-0.693179	-0.544144	-0.210309	-0.0406079	0.115616	-0.264879	-0.500637	-0.235758	0.171614	biological regulation;catabolic process;cellular catabolic process;cellular chemical homeostasis;cellular homeostasis;cellular ion homeostasis;cellular macromolecule catabolic process;cellular macromolecule metabolic process;cellular metabolic process;cellular process;cellular protein metabolic process;chemical homeostasis;entry into cell of other organism involved in symbiotic interaction;entry …	acid-amino acid ligase activity;binding;catalytic activity;ligase activity;ligase activity, forming carbon-nitrogen bonds;protein binding;RNA polymerase II transcription factor binding;small conjugating protein ligase activity;transcription factor binding;ubiquitin-protein ligase activity	cell part;cytoplasm;extracellular membrane-bounded organelle;extracellular organelle;extracellular region part;extracellular vesicular exosome;intracellular membrane-bounded organelle;intracellular organelle;intracellular part;macromolecular complex;membrane;membrane-bounded organelle;membrane-bounded vesicle;nucleus;organelle;protein complex;ubiquitin ligase complex;vesicle	biological regulation;catabolic process;cellular homeostasis;cellular ion homeostasis;cellular metabolic process;cellular process;homeostatic process;interspecies interaction between organisms;locomotion;macromolecule metabolic process;macromolecule modification;metabolic process;multi-organism process;primary metabolic process;protein metabolic process;protein modification by small protein conju…	cell part;cytoplasm;extracellular organelle;intracellular membrane-bounded organelle;intracellular organelle;macromolecular complex;membrane;nucleus;organelle;protein complex;ubiquitin ligase complex;vesicle	Ubiquitin mediated proteolysis	HECT;WW	AACTTT_UNKNOWN;ACID_AMINO_ACID_LIGASE_ACTIVITY;BIOPOLYMER_METABOLIC_PROCESS;BIOPOLYMER_MODIFICATION;BLALOCK_ALZHEIMERS_DISEASE_INCIPIENT_UP;BLALOCK_ALZHEIMERS_DISEASE_UP;BROWNE_HCMV_INFECTION_14HR_DN;BROWNE_HCMV_INFECTION_18HR_DN;CACGTG_V$MYC_Q2;CAGGTG_V$E12_Q6;CELLULAR_MACROMOLECULE_METABOLIC_PROCESS;CELLULAR_PROTEIN_METABOLIC_PROCESS;CGGAARNGGCNG_UNKNOWN;CHIARADONNA_NEOPLASTIC_TRANSFORMATION_CD…	Alternativesplicing;Completeproteome;Host-virusinteraction;Ligase;Nucleus;Phosphoprotein;Referenceproteome;Repeat;Ublconjugation;Ublconjugationpathway		5	4	4	7.7	6.6	6.6	98.911	0	10.986	428510000	234490000	194020000	O00308;O00308-2;O00308-3;O00308-4	O00308;O00308-2;O00308-3	NEDD4-like E3 ubiquitin-protein ligase WWP2	WWP2	255
-0.741157	0.498452	0.886454	0.9125	-0.342685	0.707418	0.26768	1.18509	-0.251685	0.266407	0.901806	0.49564	-0.0163182	0.939431	0.717711	0.447531	1.07923	-0.494184	0.633393	0.498452	0.49564	-0.002812	0.493359	activation of immune response;adaptive immune response;antigen receptor-mediated signaling pathway;B cell activation;B cell chemotaxis;B cell homeostasis;B cell receptor signaling pathway;biological regulation;biosynthetic process;cell activation;cell activation involved in immune response;cell chemotaxis;cell differentiation;cell migration;cell motility;cell surface receptor linked signaling pat…	1-phosphatidylinositol-3-kinase activity;adenyl nucleotide binding;adenyl ribonucleotide binding;ATP binding;binding;catalytic activity;inositol or phosphatidylinositol kinase activity;kinase activity;lipid kinase activity;nucleotide binding;phosphatidylinositol 3-kinase activity;phosphatidylinositol kinase activity;phosphatidylinositol phosphate kinase activity;phosphatidylinositol-4,5-bisphosph…	cell part;cytoplasmic part;cytosol;cytosolic part;intracellular membrane-bounded organelle;intracellular organelle;intracellular part;lysosome;lytic vacuole;macromolecular complex;mast cell granule;membrane;membrane-bounded organelle;organelle;phosphatidylinositol 3-kinase complex;plasma membrane;protein complex;vacuole	biological regulation;biosynthetic process;cell activation;cell differentiation;cell motility;cellular component movement;cellular lipid metabolic process;cellular metabolic process;cellular process;cytokine production;developmental process;establishment of localization;exocytosis;homeostatic process;immune system process;lipid metabolic process;locomotion;macromolecule metabolic process;macromol…	cell part;cytosol;intracellular membrane-bounded organelle;intracellular organelle;lysosome;macromolecular complex;membrane;organelle;phosphatidylinositol 3-kinase complex;plasma membrane;protein complex;vacuole	Acute myeloid leukemia;Aldosterone-regulated sodium reabsorption;Amoebiasis;Apoptosis;B cell receptor signaling pathway;Bacterial invasion of epithelial cells;Carbohydrate digestion and absorption;Chagas disease (American trypanosomiasis);Chemokine signaling pathway;Chronic myeloid leukemia;Colorectal cancer;Endometrial cancer;ErbB signaling pathway;Fc epsilon RI signaling pathway;Fc gamma R-medi…	PI3_PI4_kinase;PI3K_C2;PI3K_p85B;PI3K_rbd;PI3Ka	BASSO_CD40_SIGNALING_UP;BENPORATH_CYCLING_GENES;BERTUCCI_INVASIVE_CARCINOMA_DUCTAL_VS_LOBULAR_DN;BILD_HRAS_ONCOGENIC_SIGNATURE;BROWNE_HCMV_INFECTION_14HR_DN;BYSTROEM_CORRELATED_WITH_IL5_DN;BYSTRYKH_HEMATOPOIESIS_STEM_CELL_QTL_TRANS;CAGGTG_V$E12_Q6;CERVERA_SDHB_TARGETS_1_UP;CHARAFE_BREAST_CANCER_LUMINAL_VS_BASAL_DN;CHARAFE_BREAST_CANCER_LUMINAL_VS_MESENCHYMAL_DN;chr1p36;CTCTAGA,MIR-526C,MIR-518F,M…	Adaptiveimmunity;Alternativesplicing;ATP-binding;Chemotaxis;Completeproteome;Cytoplasm;Differentiation;Directproteinsequencing;Diseasemutation;Immunity;Inflammatoryresponse;Innateimmunity;Kinase;Nucleotide-binding;Phosphoprotein;Referenceproteome;Transferase		21	21	19	25.8	25.8	25.2	119.48	0	87.77	1872000000	1325700000	546270000	O00329;O00329-2	O00329	Phosphatidylinositol 4,5-bisphosphate 3-kinase catalytic subunit delta isoform	PIK3CD	256
0.528999	0.385811	-0.363156	-0.175435	1.45207	0.54021	0.702899	-0.0795138	0.0389899	0.290888	-0.483748	0.316739	0.516372	0.30248	-0.242862	0.249742	-0.633194	0.203688	0.242904	0.385811	0.249742	-0.136069	0.296342	biological regulation;carboxylic acid metabolic process;cellular ketone metabolic process;cellular metabolic process;cellular process;metabolic process;monocarboxylic acid metabolic process;organic acid metabolic process;oxoacid metabolic process;pyruvate metabolic process;regulation of acetyl-CoA biosynthetic process from pyruvate;regulation of biological process;regulation of biosynthetic proce…	catalytic activity;transferase activity;transferase activity, transferring acyl groups	cell part;cytoplasmic part;intracellular organelle lumen;intracellular organelle part;intracellular part;membrane-enclosed lumen;mitochondrial matrix;mitochondrial part;organelle lumen;organelle part	biological regulation;cellular ketone metabolic process;cellular metabolic process;cellular process;metabolic process;organic acid metabolic process;small molecule metabolic process	cell part	Citrate cycle (TCA cycle);Glycolysis / Gluconeogenesis;Pyruvate metabolism	2-oxoacid_dh;Biotin_lipoyl;E3_binding	ACEVEDO_FGFR1_TARGETS_IN_PROSTATE_CANCER_MODEL_UP;ACTGTGA,MIR-27A,MIR-27B;BLALOCK_ALZHEIMERS_DISEASE_DN;BLALOCK_ALZHEIMERS_DISEASE_INCIPIENT_DN;CACTGTG,MIR-128A,MIR-128B;chr11p13;DIAZ_CHRONIC_MEYLOGENOUS_LEUKEMIA_UP;FIGUEROA_AML_METHYLATION_CLUSTER_1_UP;FIGUEROA_AML_METHYLATION_CLUSTER_3_UP;FLECHNER_BIOPSY_KIDNEY_TRANSPLANT_REJECTED_VS_OK_DN;FORTSCHEGGER_PHF8_TARGETS_UP;GSE12845_NAIVE_VS_DARKZONE…	3D-structure;Acetylation;Alternativesplicing;Completeproteome;Lipoyl;Mitochondrion;Phosphoprotein;Polymorphism;Referenceproteome;Transitpeptide		14	14	14	31.7	31.7	31.7	51.459	0	133.28	1944400000	1391700000	552610000	O00330-3;O00330;O00330-2	O00330-3;O00330	Pyruvate dehydrogenase protein X component, mitochondrial	PDHX	257
1.96444	-0.621188	NaN	NaN	1.76681	2.13037	NaN	NaN	1.75016	1.51376	0.46241	NaN	1.57824	NaN	0.83201	1.05851	NaN	1.10609	0.593984	1.76681	1.0823	-0.684516	0.00250571	biological regulation;cell redox homeostasis;cellular homeostasis;cellular macromolecule metabolic process;cellular metabolic process;cellular process;cellular protein metabolic process;homeostatic process;macromolecule metabolic process;metabolic process;negative regulation of autophagy;negative regulation of biological process;negative regulation of catabolic process;negative regulation of cell…	catalytic activity;flavin-linked sulfhydryl oxidase activity;intramolecular oxidoreductase activity;intramolecular oxidoreductase activity, interconverting keto- and enol-groups;intramolecular oxidoreductase activity, transposing S-S bonds;isomerase activity;oxidoreductase activity;oxidoreductase activity, acting on a sulfur group of donors;oxidoreductase activity, acting on a sulfur group of don…	cell part;cytoplasmic part;extracellular membrane-bounded organelle;extracellular organelle;extracellular region part;extracellular space;extracellular vesicular exosome;Golgi apparatus;Golgi apparatus part;integral to Golgi membrane;integral to membrane;integral to organelle membrane;intercellular bridge;intracellular membrane-bounded organelle;intracellular organelle;intracellular organelle par…	biological regulation;cellular homeostasis;cellular metabolic process;cellular process;homeostatic process;macromolecule metabolic process;metabolic process;primary metabolic process;protein folding;protein metabolic process	cell part;extracellular organelle;extracellular space;Golgi apparatus;intracellular membrane-bounded organelle;intracellular organelle;organelle;vesicle		Evr1_Alr;Thioredoxin	ACEVEDO_LIVER_CANCER_WITH_H3K27ME3_UP;ALFANO_MYC_TARGETS;BIOPOLYMER_METABOLIC_PROCESS;BIOPOLYMER_MODIFICATION;BLUM_RESPONSE_TO_SALIRASIB_UP;BOCHKIS_FOXA2_TARGETS;BORCZUK_MALIGNANT_MESOTHELIOMA_UP;BOYAULT_LIVER_CANCER_SUBCLASS_G56_DN;BREDEMEYER_RAG_SIGNALING_VIA_ATM_NOT_VIA_NFKB_UP;BROWN_MYELOID_CELL_DEVELOPMENT_UP;BRUINS_UVC_RESPONSE_VIA_TP53_GROUP_B;BYSTRYKH_HEMATOPOIESIS_STEM_CELL_QTL_TRANS;CAT…	3D-structure;Alternativesplicing;Completeproteome;Disulfidebond;FAD;Flavoprotein;Glycoprotein;Golgiapparatus;Membrane;Oxidoreductase;Polymorphism;Referenceproteome;Secreted;Signal;Transmembrane;Transmembranehelix		6	6	6	13.4	13.4	13.4	66.86	0	22.073	244810000	207460000	37355000	O00391-2;O00391	O00391-2;O00391	Sulfhydryl oxidase 1	QSOX1	258
-1.13335	0.168503	0.40502	0.339711	-1.18115	0.258319	-0.250122	0.341817	-1.98139	0.0657996	0.288473	0.233183	-0.165587	-0.143473	0.124841	0.180022	0.611822	-1.20812	0.338755	0.168503	0.124841	-0.0436623	0.439492	acetyl-CoA transport;biological regulation;BMP signaling pathway;cation transport;cell surface receptor linked signaling pathway;cellular process;cellular response to stimulus;coenzyme transport;cofactor transport;enzyme linked receptor protein signaling pathway;establishment of localization;hydrogen transport;ion transport;monovalent inorganic cation transport;proton transport;regulation of biol…	acetyl-CoA transporter activity;active transmembrane transporter activity;cation transmembrane transporter activity;coenzyme transporter activity;cofactor transporter activity;ion transmembrane transporter activity;secondary active transmembrane transporter activity;solute:cation symporter activity;solute:hydrogen symporter activity;substrate-specific transmembrane transporter activity;substrate-…	cell part;cytoplasmic part;endoplasmic reticulum membrane;endoplasmic reticulum part;Golgi apparatus part;Golgi membrane;integral to membrane;integral to plasma membrane;intracellular organelle part;intracellular part;intrinsic to membrane;intrinsic to plasma membrane;membrane;membrane part;organelle membrane;organelle part;plasma membrane part	biological regulation;cellular process;cofactor transport;establishment of localization;hydrogen transport;ion transport;response to stimulus;signal transduction;transmembrane transport;transport	cell part;membrane	Glycosphingolipid biosynthesis - ganglio series	Acatn	ACCAAAG,MIR-9;ACEVEDO_LIVER_CANCER_UP;ACEVEDO_LIVER_TUMOR_VS_NORMAL_ADJACENT_TISSUE_UP;BLALOCK_ALZHEIMERS_DISEASE_UP;BLUM_RESPONSE_TO_SALIRASIB_UP;BUYTAERT_PHOTODYNAMIC_THERAPY_STRESS_UP;CACGTG_V$MYC_Q2;CELL_FRACTION;chr3q;COFACTOR_TRANSPORTER_ACTIVITY;CUI_GLUCOSE_DEPRIVATION;CUI_TCF21_TARGETS_2_DN;CYTOPLASM;CYTOPLASMIC_PART;DOUGLAS_BMI1_TARGETS_DN;ENDOMEMBRANE_SYSTEM;ENDOPLASMIC_RETICULUM;ENDOPL…	Cataract;Completeproteome;Deafness;Diseasemutation;Endoplasmicreticulum;Glycoprotein;Hereditaryspasticparaplegia;Membrane;Neurodegeneration;Phosphoprotein;Polymorphism;Referenceproteome;Transmembrane;Transmembranehelix;Transport		5	5	5	10.9	10.9	10.9	60.908	0	11.137	30051000000	18030000000	12021000000	O00400	O00400	Acetyl-coenzyme A transporter 1	SLC33A1	260
-1.30556	-0.954158	-0.830039	-0.707158	-1.51431	-1.36441	-0.817487	-0.68151	-1.53149	-0.958045	-0.942711	-1.21201	-1.02615	-0.824351	-0.940659	-0.900412	-0.689219	-1.37066	0.498101	-0.954158	-0.942711	0.011447	0.470207	biological regulation;cellular process;cellular response to acid;cellular response to amine stimulus;cellular response to amino acid stimulus;cellular response to chemical stimulus;cellular response to endogenous stimulus;cellular response to organic nitrogen;cellular response to organic substance;cellular response to stimulus;establishment of localization;establishment of localization in cell;es…	binding;enzyme binding;enzyme inhibitor activity;enzyme regulator activity;GTPase binding;GTPase inhibitor activity;GTPase regulator activity;nucleoside-triphosphatase regulator activity;protein binding;protein transporter activity;Ran GTPase binding;Ras GTPase binding;small GTPase binding;substrate-specific transporter activity;transporter activity	cell part;cytoplasm;cytoplasmic part;Golgi apparatus;intracellular membrane-bounded organelle;intracellular non-membrane-bounded organelle;intracellular organelle;intracellular organelle part;intracellular part;macromolecular complex;membrane;membrane part;membrane-bounded organelle;non-membrane-bounded organelle;nuclear membrane;nuclear part;nuclear pore;nucleolus;nucleoplasm;nucleus;organelle;o…	biological regulation;cellular process;establishment of localization;nuclear transport;nucleocytoplasmic transport;protein targeting;protein transport;regulation of transport;response to chemical stimulus;response to endogenous stimulus;response to stimulus;transport;viral reproduction	cell part;cytoplasm;Golgi apparatus;intracellular membrane-bounded organelle;intracellular non-membrane-bounded organelle;intracellular organelle;macromolecular complex;membrane;nuclear pore;nucleolus;nucleoplasm;nucleus;organelle;protein complex		HEAT	AATGTGA,MIR-23A,MIR-23B;ATGTCAC,MIR-489;BENPORATH_MYC_MAX_TARGETS;BERENJENO_TRANSFORMED_BY_RHOA_UP;BLALOCK_ALZHEIMERS_DISEASE_DN;BOYAULT_LIVER_CANCER_SUBCLASS_G3_UP;BURTON_ADIPOGENESIS_PEAK_AT_24HR;CAIRO_HEPATOBLASTOMA_CLASSES_UP;CELLULAR_LOCALIZATION;CHARAFE_BREAST_CANCER_LUMINAL_VS_MESENCHYMAL_DN;chr13q32;CREIGHTON_ENDOCRINE_THERAPY_RESISTANCE_1;CYTOPLASM;DIAZ_CHRONIC_MEYLOGENOUS_LEUKEMIA_UP;DO…	Acetylation;Alternativesplicing;Completeproteome;Cytoplasm;Directproteinsequencing;Host-virusinteraction;Nucleus;Phosphoprotein;Polymorphism;Proteintransport;Referenceproteome;Repeat;Transport		44	44	43	57.2	57.2	56.6	123.63	0	323.31	19371000000	8839800000	10531000000	O00410;O00410-3;O00410-2	O00410;O00410-3;O00410-2	Importin-5	IPO5	262
0.0352786	-1.79476	NaN	-2.31182	0.576723	-1.53704	NaN	NaN	NaN	-1.17755	-2.42108	-1.76261	-1.36193	-1.30571	-1.95339	-1.06736	NaN	-0.973558	0.435418	-1.53704	-1.33382	0.203212	0.195965	biosynthetic process;cellular biosynthetic process;cellular component organization;cellular component organization at cellular level;cellular component organization or biogenesis;cellular component organization or biogenesis at cellular level;cellular macromolecule biosynthetic process;cellular macromolecule metabolic process;cellular metabolic process;cellular nitrogen compound metabolic process…	binding;catalytic activity;DNA binding;DNA-directed RNA polymerase activity;nucleic acid binding;nucleotidyltransferase activity;RNA polymerase activity;transferase activity;transferase activity, transferring phosphorus-containing groups	cell part;cytoplasmic part;intracellular membrane-bounded organelle;intracellular non-membrane-bounded organelle;intracellular organelle;intracellular organelle lumen;intracellular organelle part;intracellular part;membrane-bounded organelle;membrane-enclosed lumen;mitochondrial matrix;mitochondrial nucleoid;mitochondrial part;mitochondrion;non-membrane-bounded organelle;nucleoid;organelle;organe…	biosynthetic process;cellular component organization;cellular metabolic process;cellular nitrogen compound metabolic process;cellular process;macromolecule metabolic process;metabolic process;mitochondrion organization;nitrogen compound metabolic process;nucleobase-containing compound metabolic process;organelle organization;primary metabolic process;RNA metabolic process;transcription initiation…	cell part;intracellular membrane-bounded organelle;intracellular non-membrane-bounded organelle;intracellular organelle;mitochondrion;organelle		RNA_pol;RPOL_N	BIOPOLYMER_METABOLIC_PROCESS;BLALOCK_ALZHEIMERS_DISEASE_UP;chr19p13;COLDREN_GEFITINIB_RESISTANCE_UP;CYTOPLASM;CYTOPLASMIC_PART;DIAZ_CHRONIC_MEYLOGENOUS_LEUKEMIA_UP;FOURNIER_ACINAR_DEVELOPMENT_LATE_2;FRASOR_RESPONSE_TO_SERM_OR_FULVESTRANT_DN;GCNP_SHH_UP_LATE.V1_UP;GRAESSMANN_APOPTOSIS_BY_DOXORUBICIN_UP;GRAESSMANN_RESPONSE_TO_MC_AND_DOXORUBICIN_UP;GSE14000_4H_VS_16H_LPS_DC_DN;GSE14000_UNSTIM_VS_4H_…	3D-structure;Completeproteome;DNA-directedRNApolymerase;Mitochondrion;Nucleotidyltransferase;Polymorphism;Referenceproteome;Transcription;Transferase;Transitpeptide		11	11	11	14.2	14.2	14.2	138.62	0	36.765	215430000	87190000	128240000	O00411	O00411	DNA-directed RNA polymerase, mitochondrial	POLRMT	263
0.418795	0.00218302	-0.599613	-0.211247	0.530087	0.503161	0.514642	-0.106064	0.902148	0.150315	-0.171125	-0.0412217	0.0709697	-0.163365	-0.327667	0.22206	-0.0763381	0.296247	0.222753	0.418795	-0.0412217	-0.460016	0.0302898	biological regulation;biosynthetic process;cellular biosynthetic process;cellular component organization;cellular component organization at cellular level;cellular component organization or biogenesis;cellular component organization or biogenesis at cellular level;cellular macromolecule biosynthetic process;cellular macromolecule metabolic process;cellular metabolic process;cellular nitrogen comp…	protein binding transcription factor activity;transcription cofactor activity;transcription corepressor activity;transcription factor binding transcription factor activity	cell part;chromatin remodeling complex;cytoplasm;histone deacetylase complex;intracellular organelle part;intracellular part;macromolecular complex;nuclear body;nuclear part;nuclear speck;nucleoplasm;nucleoplasm part;organelle part;protein complex	biological regulation;biosynthetic process;cellular component organization;cellular metabolic process;cellular nitrogen compound metabolic process;cellular process;chromatin organization;chromosome organization;macromolecule metabolic process;metabolic process;mRNA metabolic process;mRNA processing;nitrogen compound metabolic process;nucleobase-containing compound metabolic process;organelle orga…	cell part;chromatin remodeling complex;cytoplasm;macromolecular complex;nucleoplasm;protein complex	mRNA surveillance pathway;RNA transport	SAP18	ACEVEDO_LIVER_CANCER_DN;ACEVEDO_NORMAL_TISSUE_ADJACENT_TO_LIVER_TUMOR_DN;BENPORATH_MYC_MAX_TARGETS;BIOPOLYMER_METABOLIC_PROCESS;BLALOCK_ALZHEIMERS_DISEASE_DN;CHEOK_RESPONSE_TO_MERCAPTOPURINE_AND_HD_MTX_DN;chr13q12;DACOSTA_UV_RESPONSE_VIA_ERCC3_UP;DANG_BOUND_BY_MYC;DAZARD_RESPONSE_TO_UV_NHEK_UP;DAZARD_UV_RESPONSE_CLUSTER_G1;FAELT_B_CLL_WITH_VH_REARRANGEMENTS_UP;FAELT_B_CLL_WITH_VH3_21_DN;FLECHNER_…	3D-structure;Acetylation;Completeproteome;Cytoplasm;mRNAprocessing;mRNAsplicing;Nucleus;Referenceproteome;Repressor;Transcription;Transcriptionregulation	ALL-1 supercomplex;Apoptosis- and splicing-associated protein complex (ASAP-L), SAP18-RNPS1-Acinus-L;Apoptosis- and splicing-associated protein complex (ASAP-S), SAP18-RNPS1-Acinus-S;Emerin complex 32;Sin3 complex;SIN3 complex;SIN3-ING1b complex I;SIN3-ING1b complex II;SIN3-SAP25 complex	13	13	13	75.2	75.2	75.2	17.561	0	103.87	5955300000	3721200000	2234100000	O00422	O00422	Histone deacetylase complex subunit SAP18	SAP18	265
0.182443	-0.173805	-0.683787	-0.360619	-0.221556	-0.263513	-0.859785	-0.674978	-0.506044	-0.0554432	-2.06709	0.275077	-0.518005	0.119714	-0.980934	-0.0505319	-0.541892	0.441846	0.943012	-0.360619	-0.0554432	0.305176	0.10176	anatomical structure morphogenesis;biological regulation;biosynthetic process;cellular biosynthetic process;cellular macromolecule biosynthetic process;cellular macromolecule metabolic process;cellular metabolic process;cellular process;cellular protein metabolic process;developmental process;establishment of localization;establishment of RNA localization;gene expression;macromolecule biosyntheti…	binding;mRNA 3'-UTR binding;mRNA 5'-UTR binding;mRNA binding;nucleic acid binding;nucleotide binding;RNA binding;translation regulator activity	cell part;cytoplasm;cytoplasmic part;cytosol;intracellular membrane-bounded organelle;intracellular organelle;intracellular part;membrane-bounded organelle;nucleus;organelle	anatomical structure morphogenesis;biological regulation;biosynthetic process;cellular metabolic process;cellular process;developmental process;establishment of localization;macromolecule metabolic process;metabolic process;nucleobase-containing compound transport;primary metabolic process;protein metabolic process;regulation of translation;translation;transport	cell part;cytoplasm;cytosol;intracellular membrane-bounded organelle;intracellular organelle;nucleus;organelle		KH_1;RRM_1	AAAGACA,MIR-511;AACWWCAANK_UNKNOWN;ACCAAAG,MIR-9;ACTACCT,MIR-196A,MIR-196B;ACTTTAT,MIR-142-5P;ANATOMICAL_STRUCTURE_DEVELOPMENT;ANATOMICAL_STRUCTURE_MORPHOGENESIS;BENPORATH_ES_1;BENPORATH_NANOG_TARGETS;BENPORATH_SOX2_TARGETS;BIOPOLYMER_METABOLIC_PROCESS;BOYAULT_LIVER_CANCER_SUBCLASS_G23_UP;BREDEMEYER_RAG_SIGNALING_VIA_ATM_NOT_VIA_NFKB_UP;BROWNE_HCMV_INFECTION_10HR_DN;BROWNE_HCMV_INFECTION_20HR_DN;…	3D-structure;Alternativesplicing;Completeproteome;Cytoplasm;mRNAtransport;Nucleus;Phosphoprotein;Referenceproteome;Repeat;RNA-binding;Translationregulation;Transport	Spliceosome	12	9	9	21.8	16.1	16.1	63.704	0	27.224	2065700000	1116200000	949510000	O00425;O00425-2	O00425	Insulin-like growth factor 2 mRNA-binding protein 3	IGF2BP3	266
-0.185357	0.0973708	0.509665	0.337958	-0.249174	-0.306021	-0.176392	0.281636	-0.641011	-0.062208	0.125313	-0.0646997	0.132521	0.285961	0.151528	-0.074035	-0.00432839	-0.604876	0.87402	-0.176392	-0.00432839	0.172063	0.232938	anatomical structure morphogenesis;apoptosis;apoptotic mitochondrial changes;biological regulation;cell death;cell part morphogenesis;cellular component assembly;cellular component assembly at cellular level;cellular component disassembly;cellular component disassembly at cellular level;cellular component disassembly involved in apoptosis;cellular component morphogenesis;cellular component organi…	binding;catalytic activity;enzyme binding;GTP binding;GTPase activity;guanyl nucleotide binding;guanyl ribonucleotide binding;hydrolase activity;hydrolase activity, acting on acid anhydrides;hydrolase activity, acting on acid anhydrides, in phosphorus-containing anhydrides;identical protein binding;lipid binding;nucleoside-triphosphatase activity;nucleotide binding;protein binding;protein dimeriz…	cell junction;cell part;clathrin coated vesicle membrane;coated pit;coated vesicle membrane;cytoplasm;cytoplasmic part;cytoplasmic vesicle membrane;cytoplasmic vesicle part;cytoskeletal part;cytosol;Golgi apparatus;intracellular membrane-bounded organelle;intracellular organelle;intracellular organelle part;intracellular part;macromolecular complex;membrane;membrane part;membrane-bounded organell…	anatomical structure morphogenesis;biological regulation;cell death;cellular component assembly;cellular component disassembly;cellular component morphogenesis;cellular component organization;cellular localization;cellular macromolecular complex assembly;cellular membrane organization;cellular process;death;developmental process;endocytosis;establishment of localization;localization;macromolecula…	cell part;cytoplasm;cytosol;Golgi apparatus;intracellular membrane-bounded organelle;intracellular organelle;macromolecular complex;membrane;microbody;mitochondrion;organelle;peroxisome;protein complex	Bacterial invasion of epithelial cells;Endocrine and other factor-regulated calcium reabsorption;Endocytosis;Fc gamma R-mediated phagocytosis	Dynamin_M;GED	ACTAYRNNNCCCR_UNKNOWN;APOPTOSIS_GO;APOPTOTIC_MITOCHONDRIAL_CHANGES;APOPTOTIC_PROGRAM;BAELDE_DIABETIC_NEPHROPATHY_DN;BLALOCK_ALZHEIMERS_DISEASE_DN;BOYLAN_MULTIPLE_MYELOMA_PCA3_DN;BRUINS_UVC_RESPONSE_VIA_TP53_GROUP_D;CASORELLI_ACUTE_PROMYELOCYTIC_LEUKEMIA_DN;CELL_DEVELOPMENT;chr12p;CYCLIN_D1_KE_.V1_DN;CYTOPLASM;CYTOPLASMIC_PART;DIAZ_CHRONIC_MEYLOGENOUS_LEUKEMIA_UP;DODD_NASOPHARYNGEAL_CARCINOMA_DN;E…	3D-structure;Acetylation;Alternativesplicing;Celljunction;Coatedpit;Completeproteome;Cytoplasm;Cytoplasmicvesicle;Diseasemutation;Endocytosis;Glycoprotein;Golgiapparatus;GTP-binding;Hydrolase;Isopeptidebond;Lipid-binding;Membrane;Mitochondrion;Mitochondrionoutermembrane;Necrosis;Nucleotide-binding;Peroxisome;Phosphoprotein;Polymorphism;Referenceproteome;S-nitrosylation;Synapse;Ublconjugation	DLP1-hFIS1 complex	39	39	39	71.5	71.5	71.5	81.876	0	323.31	11031000000	6741400000	4289100000	O00429;O00429-3;O00429-2;O00429-6;O00429-4;O00429-5;O00429-8;O00429-7	O00429;O00429-3;O00429-2;O00429-6;O00429-4;O00429-5;O00429-8;O00429-7	Dynamin-1-like protein	DNM1L	267
-0.91521	-0.343237	0.310872	0.0749051	-0.440018	-0.124891	0.514642	0.267398	-0.683593	0.554401	0.144414	-0.466919	-0.549752	-0.280874	0.232863	-0.0934995	0.599671	-0.697555	0.705582	-0.124891	-0.0934995	0.0313919	0.43801	cellular macromolecule metabolic process;cellular metabolic process;cellular nitrogen compound metabolic process;cellular process;macromolecule metabolic process;metabolic process;nitrogen compound metabolic process;nucleic acid metabolic process;nucleobase-containing compound metabolic process;primary metabolic process;RNA metabolic process;RNA processing	adenyl nucleotide binding;adenyl ribonucleotide binding;ATP binding;binding;catalytic activity;cyclase activity;ligase activity;ligase activity, forming phosphoric ester bonds;nucleic acid binding;nucleotide binding;purine nucleotide binding;purine ribonucleoside triphosphate binding;purine ribonucleotide binding;ribonucleotide binding;RNA binding;RNA-3'-phosphate cyclase activity	cell part;intracellular membrane-bounded organelle;intracellular organelle;intracellular organelle part;intracellular part;membrane-bounded organelle;nuclear part;nucleoplasm;nucleus;organelle;organelle part	cellular metabolic process;cellular nitrogen compound metabolic process;cellular process;macromolecule metabolic process;metabolic process;nitrogen compound metabolic process;nucleobase-containing compound metabolic process;primary metabolic process;RNA metabolic process;RNA processing	cell part;intracellular membrane-bounded organelle;intracellular organelle;nucleoplasm;nucleus;organelle		RTC;RTC_insert		Alternativesplicing;ATP-binding;Completeproteome;Directproteinsequencing;Ligase;Nucleotide-binding;Nucleus;Referenceproteome		11	11	11	45.6	45.6	45.6	39.336	0	77.863	1672800000	1005100000	667710000	O00442;O00442-2	O00442;O00442-2	RNA 3-terminal phosphate cyclase	RTCA	268
0.542241	1.17862	-0.316877	-0.509657	1.12858	0.989233	1.47266	-0.224204	0.689555	-0.195812	0.0646713	-0.346389	1.1259	-0.176102	0.150433	0.897018	0.462642	0.382528	0.347561	0.689555	0.150433	-0.539123	0.0137564	establishment of localization;transport		cell part;cis-Golgi network;cytoplasmic membrane-bounded vesicle;cytoplasmic part;cytoplasmic vesicle;endocytic vesicle;endosomal part;endosome membrane;Golgi apparatus;Golgi apparatus part;Golgi cisterna membrane;Golgi lumen;Golgi membrane;integral to membrane;intracellular membrane-bounded organelle;intracellular organelle;intracellular organelle lumen;intracellular organelle part;intracellular…	establishment of localization;transport	cell part;cytoplasmic membrane-bounded vesicle;Golgi apparatus;intracellular membrane-bounded organelle;intracellular organelle;membrane;nucleoplasm;organelle;vesicle			BEGUM_TARGETS_OF_PAX3_FOXO1_FUSION_UP;BENPORATH_NANOG_TARGETS;BLALOCK_ALZHEIMERS_DISEASE_UP;BROWNE_HCMV_INFECTION_48HR_DN;chr3q26;CREIGHTON_ENDOCRINE_THERAPY_RESISTANCE_1;CYTOPLASM;CYTOPLASMIC_MEMBRANE_BOUND_VESICLE;CYTOPLASMIC_PART;CYTOPLASMIC_VESICLE;ENDOCYTIC_VESICLE;GOLDRATH_HOMEOSTATIC_PROLIFERATION;GOLDRATH_IMMUNE_MEMORY;GOLDRATH_NAIVE_VS_MEMORY_CD8_TCELL_DN;GOLGI_APPARATUS;GOLGI_APPARATUS_…	Coiledcoil;Completeproteome;Endosome;Glycoprotein;Golgiapparatus;Membrane;Phosphoprotein;Polymorphism;Referenceproteome;Signal-anchor;Transmembrane;Transmembranehelix;Transport		9	9	9	18.1	18.1	18.1	81.879	0	48.302	667760000	441740000	226020000	O00461	O00461	Golgi integral membrane protein 4	GOLIM4	272
2.08707	1.06909	0.352019	0.303044	2.32194	1.37234	1.96337	1.6339	0.856427	1.45239	-0.181377	1.38766	1.21779	1.0157	1.29197	1.83393	1.75268	1.39777	0.783965	1.37234	1.38766	0.015322	0.46393	carbohydrate catabolic process;carbohydrate metabolic process;catabolic process;cell wall macromolecule catabolic process;cell wall macromolecule metabolic process;cell wall organization or biogenesis;cell wall polysaccharide metabolic process;cellodextrin metabolic process;cellular carbohydrate catabolic process;cellular carbohydrate metabolic process;cellular catabolic process;cellular cell wal…	beta-mannosidase activity;catalytic activity;hydrolase activity;hydrolase activity, acting on glycosyl bonds;hydrolase activity, hydrolyzing O-glycosyl compounds;mannosidase activity	cell part;cytoplasmic part;intracellular membrane-bounded organelle;intracellular organelle;intracellular part;lysosome;lytic vacuole;membrane-bounded organelle;organelle;vacuole	carbohydrate metabolic process;catabolic process;cell wall organization or biogenesis;cellular cell wall organization or biogenesis;cellular metabolic process;cellular process;macromolecule metabolic process;macromolecule modification;metabolic process;polysaccharide metabolic process;primary metabolic process;protein metabolic process;protein modification process	cell part;intracellular membrane-bounded organelle;intracellular organelle;lysosome;organelle;vacuole	Lysosome;Other glycan degradation	Glyco_hydro_2_C;Glyco_hydro_2_N	BROWNE_HCMV_INFECTION_1HR_DN;BROWNE_HCMV_INFECTION_48HR_DN;CAGCTG_V$AP4_Q5;CHEN_METABOLIC_SYNDROM_NETWORK;chr4q22;ESC_V6.5_UP_LATE.V1_DN;FIGUEROA_AML_METHYLATION_CLUSTER_6_UP;GAUSSMANN_MLL_AF4_FUSION_TARGETS_A_UP;GGGCGGR_V$SP1_Q6;GNF2_TYK2;GSE12845_NAIVE_VS_DARKZONE_GC_TONSIL_BCELL_UP;GSE14308_TH1_VS_NATURAL_TREG_UP;GSE1460_NAIVE_CD4_TCELL_CORD_BLOOD_VS_THYMIC_STROMAL_CELL_DN;GSE16755_CTRL_VS_IFN…	Completeproteome;Glycoprotein;Glycosidase;Hydrolase;Lysosome;Polymorphism;Referenceproteome;Signal		32	31	31	41	40.2	40.2	100.89	0	187.13	3473200000	2625400000	847820000	O00462	O00462	Beta-mannosidase	MANBA	273
-0.0739391	0.167325	0.606039	0.480104	-0.184713	0.273233	0.120725	0.119248	0.442674	0.05733	0.127975	-0.0586188	0.172118	0.833283	-0.130299	0.344574	0.495923	0.0887168	0.987034	0.167325	0.127975	-0.0393492	0.446545	cellular component organization;cellular component organization at cellular level;cellular component organization or biogenesis;cellular component organization or biogenesis at cellular level;cellular macromolecule metabolic process;cellular metabolic process;cellular process;cellular protein metabolic process;establishment of localization;establishment of localization in cell;establishment of pr…	binding;enzyme binding;GTPase binding;protein binding;Ral GTPase binding;Ras GTPase binding;small GTPase binding	cell part;cytoplasm;cytoplasmic part;cytosol;intracellular part	cellular component organization;cellular metabolic process;cellular process;establishment of localization;exocytosis;Golgi vesicle transport;macromolecule metabolic process;membrane docking;membrane organization;metabolic process;organelle organization;primary metabolic process;protein metabolic process;protein transport;secretion;transport;vesicle-mediated transport	cell part;cytoplasm;cytosol		Sec10	AAGCACA,MIR-218;ACAWYAAAG_UNKNOWN;ACTTTAT,MIR-142-5P;AGUIRRE_PANCREATIC_CANCER_COPY_NUMBER_UP;AMIT_EGF_RESPONSE_60_HELA;BENPORATH_SOX2_TARGETS;CAGCTG_V$AP4_Q5;CAGTGTT,MIR-141,MIR-200A;CATRRAGC_UNKNOWN;CATTGTYY_V$SOX9_B1;CELLULAR_LOCALIZATION;chr14q22;CTAGGAA,MIR-384;CTGAGCC,MIR-24;CTGTTAC,MIR-194;CTTTGTA,MIR-524;CYTOPLASM;DIAZ_CHRONIC_MEYLOGENOUS_LEUKEMIA_UP;ESTABLISHMENT_OF_CELLULAR_LOCALIZATION…	Acetylation;Coiledcoil;Completeproteome;Cytoplasm;Exocytosis;Phosphoprotein;Polymorphism;Proteintransport;Referenceproteome;Transport	Sec6/8 exocyst complex	11	11	11	22.9	22.9	22.9	81.852	0	44.863	470270000	287220000	183040000	O00471	O00471	Exocyst complex component 5	EXOC5	276
0.937764	1.4917	0.333021	0.731974	0.0779447	1.52203	0.706728	0.940285	1.53987	0.530161	1.2965	1.03349	1.25736	0.743332	1.05778	1.25265	1.165	1.26213	0.470467	0.937764	1.165	0.227233	0.170042	cellular metabolic process;cellular process;electron transport chain;generation of precursor metabolites and energy;metabolic process;mitochondrial electron transport, NADH to ubiquinone;oxidation-reduction process;respiratory electron transport chain;small molecule metabolic process	binding;catalytic activity;NADH dehydrogenase (quinone) activity;NADH dehydrogenase (ubiquinone) activity;NADH dehydrogenase activity;oxidoreductase activity;oxidoreductase activity, acting on NADH or NADPH;oxidoreductase activity, acting on NADH or NADPH, quinone or similar compound as acceptor;protein binding;protein complex binding	cell part;cytoplasmic part;extracellular membrane-bounded organelle;extracellular organelle;extracellular region part;extracellular vesicular exosome;intracellular membrane-bounded organelle;intracellular organelle;intracellular organelle part;intracellular part;macromolecular complex;membrane;membrane part;membrane-bounded organelle;membrane-bounded vesicle;mitochondrial inner membrane;mitochond…	cellular metabolic process;cellular process;generation of precursor metabolites and energy;metabolic process;small molecule metabolic process	cell part;extracellular organelle;intracellular membrane-bounded organelle;intracellular organelle;macromolecular complex;membrane;mitochondrion;NADH dehydrogenase complex;organelle;protein complex;respiratory chain complex IV;vesicle	Alzheimer's disease;Huntington's disease;Oxidative phosphorylation;Parkinson's disease	B12D	ATGAAGG,MIR-205;BAE_BRCA1_TARGETS_UP;BLALOCK_ALZHEIMERS_DISEASE_DN;CAGCTG_V$AP4_Q5;CAMPS_COLON_CANCER_COPY_NUMBER_UP;CHIANG_LIVER_CANCER_SUBCLASS_UNANNOTATED_DN;chr7p21;CTGCAGY_UNKNOWN;CYTOPLASM;CYTOPLASMIC_PART;DELACROIX_RARG_BOUND_MEF;GCANCTGNY_V$MYOD_Q6;GRADE_COLON_CANCER_UP;GSE10325_BCELL_VS_LUPUS_BCELL_DN;GSE12845_IGD_NEG_BLOOD_VS_NAIVE_TONSIL_BCELL_UP;GSE12845_NAIVE_VS_PRE_GC_TONSIL_BCELL_D…	Acetylation;Completeproteome;Electrontransport;Leighsyndrome;Membrane;Mitochondrion;Mitochondrioninnermembrane;Referenceproteome;Respiratorychain;Transport	Respiratory chain complex I (beta subunit) mitochondrial;Respiratory chain complex I (holoenzyme), mitochondrial	5	5	5	55.6	55.6	55.6	9.3697	0	12.402	9727300000	7430500000	2296800000	O00483	O00483	Cytochrome c oxidase subunit NDUFA4	NDUFA4	278
-0.592584	-0.848343	-0.364882	-0.258691	-0.515809	-1.2001	-0.464215	-0.51417	-1.0164	-0.742387	-0.814272	-0.677975	-0.597634	-0.344123	-0.722796	-0.828513	-1.02783	-0.93433	0.425045	-0.515809	-0.742387	-0.226579	0.181467	activation of immune response;activation of innate immune response;anaphase-promoting complex-dependent proteasomal ubiquitin-dependent protein catabolic process;antigen processing and presentation;antigen processing and presentation of exogenous antigen;antigen processing and presentation of exogenous peptide antigen;antigen processing and presentation of exogenous peptide antigen via MHC class …	binding;catalytic activity;cation binding;endopeptidase activator activity;endopeptidase regulator activity;enzyme activator activity;enzyme regulator activity;hydrolase activity;ion binding;metal ion binding;metallopeptidase activity;peptidase activator activity;peptidase activity;peptidase activity, acting on L-amino acid peptides;peptidase regulator activity;proteasome binding;protein binding;…	cell part;cytoplasmic part;cytosol;extracellular membrane-bounded organelle;extracellular organelle;extracellular region part;extracellular vesicular exosome;intracellular membrane-bounded organelle;intracellular organelle;intracellular organelle part;intracellular part;macromolecular complex;membrane-bounded organelle;membrane-bounded vesicle;nuclear part;nucleoplasm;nucleus;organelle;organelle …	biological regulation;catabolic process;cell cycle;cell death;cellular metabolic process;cellular nitrogen compound metabolic process;cellular process;death;DNA metabolic process;DNA recombination;DNA repair;immune system process;macromolecule metabolic process;macromolecule modification;metabolic process;mitotic cell cycle;nitrogen compound metabolic process;nucleobase-containing compound metabo…	cell part;cytosol;extracellular organelle;intracellular membrane-bounded organelle;intracellular organelle;macromolecular complex;nucleoplasm;nucleus;organelle;proteasome complex;protein complex;vesicle	Proteasome	JAB;MitMem_reg	ACEVEDO_LIVER_CANCER_UP;BASSO_B_LYMPHOCYTE_NETWORK;BENPORATH_MYC_MAX_TARGETS;BENPORATH_NANOG_TARGETS;BIOCARTA_PROTEASOME_PATHWAY;BIOPOLYMER_CATABOLIC_PROCESS;BIOPOLYMER_METABOLIC_PROCESS;BLALOCK_ALZHEIMERS_DISEASE_DN;BOYAULT_LIVER_CANCER_SUBCLASS_G3_UP;BRUINS_UVC_RESPONSE_LATE;BYSTRYKH_HEMATOPOIESIS_STEM_CELL_AND_BRAIN_QTL_TRANS;CATABOLIC_PROCESS;CELLULAR_CATABOLIC_PROCESS;CELLULAR_MACROMOLECULE_…	Completeproteome;Directproteinsequencing;DNAdamage;DNArepair;Hydrolase;Metal-binding;Metalloprotease;Phosphoprotein;Protease;Proteasome;Referenceproteome;Ublconjugationpathway;Zinc	PA700 complex;PA700-20S-PA28 complex	13	13	13	57.1	57.1	57.1	34.577	0	113.64	4107700000	2066600000	2041100000	O00487	O00487	26S proteasome non-ATPase regulatory subunit 14	PSMD14	279
-0.757801	-1.18474	-0.753877	-0.837157	-0.857621	-1.35065	-0.702556	-0.900375	-1.27006	-0.737687	-1.21897	-0.989978	-1.2662	-0.875624	-1.19939	-1.19527	-0.821896	-0.835187	0.591197	-0.857621	-0.989978	-0.132357	0.301679	biological regulation;cell surface receptor linked signaling pathway;cellular component assembly;cellular component organization;cellular component organization or biogenesis;cellular process;cellular response to chemical stimulus;cellular response to cytokine stimulus;cellular response to organic substance;cellular response to stimulus;cytokine-mediated signaling pathway;entry into cell of other…	binding;nuclear localization sequence binding;peptide binding;protein transporter activity;signal sequence binding;substrate-specific transporter activity;transporter activity	cell part;cytoplasmic part;cytosol;intracellular organelle part;intracellular part;macromolecular complex;membrane part;nuclear part;nuclear pore;nucleoplasm;organelle part;pore complex;protein complex	biological regulation;cellular component assembly;cellular component organization;cellular process;establishment of localization;interspecies interaction between organisms;locomotion;macromolecular complex assembly;multi-organism process;nuclear transport;nucleocytoplasmic transport;protein complex assembly;protein targeting;protein transport;response to chemical stimulus;response to stimulus;sig…	cell part;cytosol;macromolecular complex;nuclear pore;nucleoplasm;protein complex		Arm;IBB	AACTGAC,MIR-223;AAGCCAT,MIR-135A,MIR-135B;AAGGGAT,MIR-188;ACEVEDO_LIVER_CANCER_UP;ACTGCAG,MIR-17-3P;ACTGTGA,MIR-27A,MIR-27B;AGGTGCA,MIR-500;AGTCTTA,MIR-499;ATATGCA,MIR-448;BENPORATH_MYC_MAX_TARGETS;BENPORATH_NANOG_TARGETS;BENPORATH_SOX2_TARGETS;BLALOCK_ALZHEIMERS_DISEASE_DN;BONCI_TARGETS_OF_MIR15A_AND_MIR16_1;BRUINS_UVC_RESPONSE_EARLY_LATE;BYSTROEM_CORRELATED_WITH_IL5_DN;CAATGCA,MIR-33;CACTTTG,MI…	Acetylation;Completeproteome;Cytoplasm;Host-virusinteraction;Nucleus;Phosphoprotein;Polymorphism;Proteintransport;Referenceproteome;Repeat;Transport;Viralpenetrationintohostnucleus;Virusentryintohostcell	CTCF-nucleophosmin-PARP-HIS-KPNA-LMNA-TOP complex;TNF-alpha/NF-kappa B signaling complex (CHUK, KPNA3, NFKB2, NFKBIB, REL, IKBKG, NFKB1, NFKBIE, RELB, NFKBIA, RELA, TNIP2)	18	12	12	48.6	40.3	40.3	57.81	0	244.41	3665500000	1640800000	2024700000	O00505	O00505	Importin subunit alpha-4	KPNA3	282
-0.42607	-0.264168	-1.59079	-1.43247	0.0614615	-0.361443	-0.539403	-1.45956	-0.193041	-0.681831	-1.10078	-1.38382	-0.476252	-1.28829	-1.08043	-0.5052	-0.479031	-0.624322	0.527475	-0.42607	-0.681831	-0.255761	0.151354	biological regulation;cell proliferation;cellular component biogenesis;cellular component biogenesis at cellular level;cellular component organization;cellular component organization at cellular level;cellular component organization or biogenesis;cellular component organization or biogenesis at cellular level;cellular localization;cellular macromolecule localization;cellular macromolecule metabol…	binding;ribonucleoprotein binding	cell part;chromosome;condensed chromosome;cytoplasm;intracellular membrane-bounded organelle;intracellular non-membrane-bounded organelle;intracellular organelle;intracellular organelle part;intracellular part;macromolecular complex;membrane;membrane-bounded organelle;non-membrane-bounded organelle;nuclear part;nucleolar part;nucleolus;nucleoplasm;nucleus;organelle;organelle part;PeBoW complex;pr…	biological regulation;cell proliferation;cellular component organization;cellular localization;cellular metabolic process;cellular nitrogen compound metabolic process;cellular process;localization;macromolecule metabolic process;metabolic process;nitrogen compound metabolic process;nucleobase-containing compound metabolic process;nucleus organization;organelle organization;primary metabolic proce…	cell part;chromosome;cytoplasm;intracellular membrane-bounded organelle;intracellular non-membrane-bounded organelle;intracellular organelle;macromolecular complex;membrane;nucleolus;nucleoplasm;nucleus;organelle;preribosome;protein complex;ribonucleoprotein complex		BRCT;Pescadillo_N	ACEVEDO_LIVER_CANCER_WITH_H3K27ME3_UP;ALFANO_MYC_TARGETS;ANATOMICAL_STRUCTURE_DEVELOPMENT;ANATOMICAL_STRUCTURE_MORPHOGENESIS;BASSO_B_LYMPHOCYTE_NETWORK;BILD_MYC_ONCOGENIC_SIGNATURE;BOCHKIS_FOXA2_TARGETS;CACGTG_V$MYC_Q2;CAMP_UP.V1_DN;CASORELLI_ACUTE_PROMYELOCYTIC_LEUKEMIA_DN;chr22q12;CYTAGCAAY_UNKNOWN;DCA_UP.V1_DN;GNF2_APEX1;GNF2_G22P1;GRAESSMANN_APOPTOSIS_BY_SERUM_DEPRIVATION_UP;GRAESSMANN_RESPON…	3D-structure;Acetylation;Alternativesplicing;Chromosome;Completeproteome;Nucleus;Polymorphism;Referenceproteome;Ribosomebiogenesis;rRNAprocessing;Ublconjugation		20	20	20	38.8	38.8	38.8	68.002	0	114.78	3619400000	1936600000	1682700000	O00541;O00541-2	O00541;O00541-2	Pescadillo homolog	PES1	285
-0.946238	-1.33474	0.318992	0.383336	-1.67474	-0.85325	-1.32924	-0.165871	-0.826554	-1.52212	-0.251801	0.00855137	-1.06267	-0.978181	-0.00538809	-1.41382	-0.330711	-0.683684	0.94755	-0.85325	-0.683684	0.169566	0.236062	actin cytoskeleton organization;actin filament-based process;axon guidance;biological regulation;cell communication;cell projection assembly;cell projection organization;cell surface receptor linked signaling pathway;cell-cell signaling;cellular component assembly;cellular component assembly at cellular level;cellular component organization;cellular component organization at cellular level;cellul…	binding;binding, bridging;cytokine receptor binding;cytoskeletal adaptor activity;cytoskeletal protein binding;frizzled binding;G-protein-coupled receptor binding;growth factor receptor binding;identical protein binding;interleukin-5 receptor binding;protein binding;protein binding, bridging;protein dimerization activity;protein heterodimerization activity;protein N-terminus binding;receptor bind…	adherens junction;anchoring junction;blood microparticle;cell junction;cell part;cell-substrate adherens junction;cell-substrate junction;cytoplasm;cytoplasmic membrane-bounded vesicle;cytoplasmic part;cytoplasmic vesicle;cytoskeleton;cytosol;endoplasmic reticulum membrane;endoplasmic reticulum part;extracellular membrane-bounded organelle;extracellular organelle;extracellular region part;extrace…	biological regulation;cell communication;cell-cell signaling;cellular component assembly;cellular component organization;cellular process;cytoskeleton organization;establishment of localization;locomotion;organelle organization;protein targeting;protein transport;response to chemical stimulus;response to external stimulus;response to stimulus;signal transduction;signaling;transport	cell part;cytoplasm;cytoplasmic membrane-bounded vesicle;cytoskeleton;cytosol;extracellular organelle;extracellular space;intracellular membrane-bounded organelle;intracellular non-membrane-bounded organelle;intracellular organelle;macromolecular complex;membrane;nucleus;organelle;plasma membrane;protein complex;receptor complex;vesicle		PDZ	AAAYRNCTG_UNKNOWN;AACTTT_UNKNOWN;AAGCCAT,MIR-135A,MIR-135B;ACEVEDO_LIVER_CANCER_UP;ACEVEDO_LIVER_TUMOR_VS_NORMAL_ADJACENT_TISSUE_UP;ACTACCT,MIR-196A,MIR-196B;ACTTTAT,MIR-142-5P;AGCATTA,MIR-155;ALFANO_MYC_TARGETS;ALONSO_METASTASIS_EMT_UP;ALONSO_METASTASIS_NEURAL_UP;ALONSO_METASTASIS_UP;CHARAFE_BREAST_CANCER_LUMINAL_VS_MESENCHYMAL_DN;chr8q12;CROONQUIST_NRAS_SIGNALING_UP;CYTOKINE_ACTIVITY;DANG_REGUL…	3D-structure;Acetylation;Alternativesplicing;Celljunction;Cellmembrane;Completeproteome;Cytoplasm;Cytoskeleton;Directproteinsequencing;Endoplasmicreticulum;Membrane;Nucleus;Phosphoprotein;Polymorphism;Referenceproteome;Repeat	SDCBP-CTNNB1-CTNNA1-CDH1 complex	11	11	11	47.8	47.8	47.8	32.316	0	234.43	2137300000	1162900000	974430000	O00560-2;O00560;O00560-3	O00560-2;O00560;O00560-3	Syntenin-1	SDCBP	287
0.336113	-0.0842106	-1.33326	-1.11851	0.595979	0.116607	0.0514364	-0.921234	0.297916	-0.0500158	-0.785487	-0.960514	0.183131	-0.698537	-0.608781	-0.0559817	0.0203463	-0.158851	0.674696	0.0514364	-0.158851	-0.210287	0.199805	biological regulation;cellular macromolecule metabolic process;cellular metabolic process;cellular nitrogen compound metabolic process;cellular process;macromolecule metabolic process;maturation of SSU-rRNA;metabolic process;ncRNA metabolic process;ncRNA processing;negative regulation of catalytic activity;negative regulation of hydrolase activity;negative regulation of molecular function;negativ…		cell part;chromosome;intracellular non-membrane-bounded organelle;intracellular organelle;intracellular organelle part;intracellular part;macromolecular complex;Mpp10 complex;non-membrane-bounded organelle;nuclear part;nucleolar part;nucleolus;organelle;organelle part;preribosome;protein complex;ribonucleoprotein complex;small nucleolar ribonucleoprotein complex;small-subunit processome	biological regulation;cellular metabolic process;cellular nitrogen compound metabolic process;cellular process;macromolecule metabolic process;metabolic process;nitrogen compound metabolic process;nucleobase-containing compound metabolic process;primary metabolic process;RNA metabolic process;RNA processing;RNA splicing;rRNA processing	cell part;chromosome;intracellular non-membrane-bounded organelle;intracellular organelle;macromolecular complex;nucleolus;organelle;preribosome;protein complex;ribonucleoprotein complex;small nucleolar ribonucleoprotein complex	Ribosome biogenesis in eukaryotes	Mpp10	BRUINS_UVC_RESPONSE_VIA_TP53_GROUP_A;chr2p;DAZARD_RESPONSE_TO_UV_NHEK_DN;DAZARD_RESPONSE_TO_UV_SCC_DN;GARCIA_TARGETS_OF_FLI1_AND_DAX1_DN;GCNP_SHH_UP_LATE.V1_UP;GNF2_DENR;GRAESSMANN_APOPTOSIS_BY_DOXORUBICIN_DN;GRAESSMANN_RESPONSE_TO_MC_AND_DOXORUBICIN_DN;GSE1460_INTRATHYMIC_T_PROGENITOR_VS_THYMIC_STROMAL_CELL_UP;GSE15930_STIM_VS_STIM_AND_IFNAB_24H_CD8_T_CELL_UP;GSE15930_STIM_VS_STIM_AND_IFNAB_72H_…	Acetylation;Chromosome;Coiledcoil;Completeproteome;Nucleus;Phosphoprotein;Polymorphism;Referenceproteome;Ribonucleoprotein;Ribosomebiogenesis;rRNAprocessing	IMP3-IMP4-MPP10 complex	21	21	21	32.9	32.9	32.9	78.863	0	323.31	1962400000	1092300000	870080000	O00566	O00566	U3 small nucleolar ribonucleoprotein protein MPP10	MPHOSPH10	289
0.872641	0.836848	-0.352985	-0.392603	0.486978	1.09819	1.36157	0.588348	0.853037	1.51237	0.210803	0.283409	1.04021	0.49985	0.146579	0.833973	0.660684	0.619265	0.84185	0.836848	0.619265	-0.217583	0.191458	cellular macromolecule metabolic process;cellular metabolic process;cellular nitrogen compound metabolic process;cellular process;macromolecule metabolic process;macromolecule modification;metabolic process;ncRNA metabolic process;ncRNA processing;nitrogen compound metabolic process;nucleic acid metabolic process;nucleobase-containing compound metabolic process;primary metabolic process;RNA metab…	binding;nucleic acid binding;RNA binding;snoRNA binding	box C/D snoRNP complex;cell part;cytoplasm;intracellular non-membrane-bounded organelle;intracellular organelle;intracellular organelle part;intracellular part;macromolecular complex;membrane;non-membrane-bounded organelle;nuclear part;nucleolar part;nucleolus;nucleoplasm;organelle;organelle part;preribosome;pre-snoRNP complex;ribonucleoprotein complex;small nucleolar ribonucleoprotein complex;sm…	cellular metabolic process;cellular nitrogen compound metabolic process;cellular process;macromolecule metabolic process;macromolecule modification;metabolic process;nitrogen compound metabolic process;nucleobase-containing compound metabolic process;primary metabolic process;RNA metabolic process;RNA modification;RNA processing;rRNA processing	cell part;cytoplasm;intracellular non-membrane-bounded organelle;intracellular organelle;macromolecular complex;membrane;nucleolus;nucleoplasm;organelle;preribosome;ribonucleoprotein complex;small nucleolar ribonucleoprotein complex	Ribosome biogenesis in eukaryotes	Nop;NOP5NT;NOSIC	ABRAMSON_INTERACT_WITH_AIRE;ALFANO_MYC_TARGETS;BENPORATH_ES_1;BILD_MYC_ONCOGENIC_SIGNATURE;BIOPOLYMER_METABOLIC_PROCESS;BLALOCK_ALZHEIMERS_DISEASE_UP;BROWN_MYELOID_CELL_DEVELOPMENT_DN;BURTON_ADIPOGENESIS_2;BURTON_ADIPOGENESIS_PEAK_AT_8HR;CACGTG_V$MYC_Q2;CAIRO_HEPATOBLASTOMA_CLASSES_UP;chr20p13;DODD_NASOPHARYNGEAL_CARCINOMA_DN;DUTERTRE_ESTRADIOL_RESPONSE_6HR_UP;E2F1_UP.V1_UP;FEVR_CTNNB1_TARGETS_DN…	Acetylation;Completeproteome;Cytoplasm;Directproteinsequencing;Neurodegeneration;Nucleus;Phosphoprotein;Polymorphism;Referenceproteome;Ribonucleoprotein;Ribosomebiogenesis;Spinocerebellarataxia	Nop56p-associated pre-rRNA complex	42	42	42	73.6	73.6	73.6	66.049	0	323.31	33043000000	22650000000	10393000000	O00567	O00567	Nucleolar protein 56	NOP56	290
-0.769957	-0.896386	-0.690461	-0.72543	-0.707529	-0.804303	-0.521995	-0.999661	-0.440736	-0.73822	-0.725635	-0.737775	-0.651518	-0.88769	-0.884709	-0.692618	-0.815716	-0.810916	0.510951	-0.72543	-0.73822	-0.0127904	0.490265	biological regulation;biosynthetic process;cellular biosynthetic process;cellular component assembly;cellular component assembly at cellular level;cellular component organization;cellular component organization at cellular level;cellular component organization or biogenesis;cellular component organization or biogenesis at cellular level;cellular macromolecular complex assembly;cellular macromolec…	adenyl nucleotide binding;adenyl ribonucleotide binding;ATP binding;ATPase activity;ATPase activity, coupled;ATP-dependent DNA helicase activity;ATP-dependent helicase activity;ATP-dependent RNA helicase activity;binding;catalytic activity;CTPase activity;DNA binding;DNA helicase activity;DNA-dependent ATPase activity;eukaryotic initiation factor 4E binding;GTPase activity;helicase activity;hydro…	cell part;cytoplasm;cytoplasmic part;extracellular membrane-bounded organelle;extracellular organelle;extracellular region part;extracellular vesicular exosome;intracellular membrane-bounded organelle;intracellular non-membrane-bounded organelle;intracellular organelle;intracellular organelle part;intracellular part;macromolecular complex;membrane;membrane-bounded organelle;membrane-bounded vesic…	biological regulation;biosynthetic process;cellular component assembly;cellular component organization;cellular macromolecular complex assembly;cellular metabolic process;cellular nitrogen compound metabolic process;cellular process;chromosome segregation;DNA geometric change;DNA metabolic process;immune system process;macromolecular complex assembly;macromolecule metabolic process;metabolic proc…	cell part;cytoplasm;extracellular organelle;intracellular membrane-bounded organelle;intracellular non-membrane-bounded organelle;intracellular organelle;macromolecular complex;membrane;nucleolus;nucleus;organelle;ribonucleoprotein complex;vesicle	RIG-I-like receptor signaling pathway	DEAD;Helicase_C	AAACCAC,MIR-140;AAAGACA,MIR-511;AACTTT_UNKNOWN;AAGCAAT,MIR-137;AAGCACT,MIR-520F;AAGCCAT,MIR-135A,MIR-135B;ACAACTT,MIR-382;ACACTGG,MIR-199A,MIR-199B;ACTGAAA,MIR-30A-3P,MIR-30E-3P;ACTGTAG,MIR-139;AGGTGCA,MIR-500;AGTCTAG,MIR-151;APRELIKOVA_BRCA1_TARGETS;ATAGGAA,MIR-202;ATGTACA,MIR-493;ATGTCAC,MIR-489;ATGTTAA,MIR-302C;ATP_DEPENDENT_HELICASE_ACTIVITY;ATP_DEPENDENT_RNA_HELICASE_ACTIVITY;ATPASE_ACTIVITY…	3D-structure;Acetylation;Alternativesplicing;Apoptosis;ATP-binding;Chromosomepartition;Completeproteome;Cytoplasm;Directproteinsequencing;DNA-binding;Helicase;Host-virusinteraction;Hydrolase;Immunity;Innateimmunity;Membrane;Mitochondrion;Mitochondrionoutermembrane;Nucleotide-binding;Nucleus;Phosphoprotein;Polymorphism;Referenceproteome;Ribosomebiogenesis;RNA-binding;Transcription;Transcriptionreg…	Large Drosha complex;Spliceosome;TNF-alpha/Nf-kappa B signaling complex (RPL6, RPL30, RPS13, CHUK, DDX3X, NFKB2, NFKBIB, REL, IKBKG, NFKB1, MAP3K8, RELB, GLG1, NFKBIA, RELA, TNIP2, GTF2I)	43	42	15	69.8	68.1	27	73.243	0	323.31	21625000000	10554000000	11072000000	O00571;O00571-2;Q9NQI0-3;Q9NQI0-2;Q9NQI0-4;Q9NQI0	O00571;O00571-2	ATP-dependent RNA helicase DDX3X	DDX3X	291
-0.0278086	0.0227808	-0.673439	-0.644309	-1.04828	1.61843	0.0192243	0.0508366	0.643559	0.444623	-0.173339	-0.14368	0.305666	-1.55458	-0.0543766	0.56319	1.28707	0.225887	0.779773	0.0192243	0.225887	0.206662	0.1921	catabolic process;cellular catabolic process;cellular macromolecule catabolic process;cellular macromolecule metabolic process;cellular metabolic process;cellular nitrogen compound metabolic process;cellular process;macromolecule catabolic process;macromolecule metabolic process;metabolic process;nitrogen compound metabolic process;nucleic acid metabolic process;nucleobase-containing compound met…	binding;catalytic activity;endonuclease activity;endonuclease activity, active with either ribo- or deoxyribonucleic acids and producing 3'-phosphomonoesters;endoribonuclease activity;endoribonuclease activity, producing 3'-phosphomonoesters;hydrolase activity;hydrolase activity, acting on ester bonds;nuclease activity;nucleic acid binding;ribonuclease activity;ribonuclease T2 activity;RNA binding	cell part;cytoplasmic part;endoplasmic reticulum lumen;endoplasmic reticulum part;extracellular membrane-bounded organelle;extracellular organelle;extracellular region;extracellular region part;extracellular space;extracellular vesicular exosome;intracellular membrane-bounded organelle;intracellular organelle;intracellular organelle lumen;intracellular organelle part;intracellular part;lysosomal …	catabolic process;cellular metabolic process;cellular nitrogen compound metabolic process;cellular process;macromolecule metabolic process;metabolic process;nitrogen compound metabolic process;nucleobase-containing compound metabolic process;primary metabolic process;RNA catabolic process;RNA metabolic process	cell part;extracellular organelle;extracellular region;extracellular space;intracellular membrane-bounded organelle;intracellular organelle;lysosome;organelle;vacuole;vesicle		Ribonuclease_T2	BASAKI_YBX1_TARGETS_DN;BENPORATH_MYC_MAX_TARGETS;BIOPOLYMER_CATABOLIC_PROCESS;BIOPOLYMER_METABOLIC_PROCESS;BLALOCK_ALZHEIMERS_DISEASE_DN;BLALOCK_ALZHEIMERS_DISEASE_INCIPIENT_UP;BLALOCK_ALZHEIMERS_DISEASE_UP;BUYTAERT_PHOTODYNAMIC_THERAPY_STRESS_DN;CATABOLIC_PROCESS;CELLULAR_CATABOLIC_PROCESS;CELLULAR_MACROMOLECULE_CATABOLIC_PROCESS;CHICAS_RB1_TARGETS_SENESCENT;chr6q27;DANG_BOUND_BY_MYC;ENK_UV_RESP…	3D-structure;Alternativesplicing;Completeproteome;Diseasemutation;Disulfidebond;Endonuclease;Endoplasmicreticulum;Glycoprotein;Hydrolase;Lysosome;Nuclease;Polymorphism;Referenceproteome;Secreted;Signal		13	13	12	53.5	53.5	51.2	29.48	0	279.34	15303000000	9919300000	5383900000	O00584;O00584-2;Q07343-4;Q07343-2	O00584	Ribonuclease T2	RNASET2	292
1.96629	2.5031	2.35372	2.99782	NaN	4.60215	NaN	2.98845	4.72195	NaN	5.05066	3.52082	2.33188	1.59701	4.9394	2.33713	3.99102	3.2309	0.730192	2.98845	3.37586	0.387415	0.0540619	activation of immune response;activation of innate immune response;biological regulation;cell recognition;cell surface pattern recognition receptor signaling pathway;cell surface receptor linked signaling pathway;cellular localization;cellular macromolecule localization;cellular process;cellular protein localization;cellular response to stimulus;complement activation;complement activation, lectin…	binding;carbohydrate binding;cation binding;G-protein-coupled receptor binding;ion binding;metal ion binding;molecular transducer activity;monosaccharide binding;pattern recognition receptor activity;protein binding;receptor activity;receptor binding;sialic acid binding;signal transducer activity;signaling receptor activity;sugar binding	cell part;collagen;extracellular matrix part;extracellular region;extracellular region part;extrinsic to external side of plasma membrane;extrinsic to membrane;extrinsic to plasma membrane;membrane part;plasma membrane part	biological regulation;cell recognition;cellular localization;cellular process;immune system process;localization;macromolecule metabolic process;metabolic process;primary metabolic process;protein metabolic process;regulation of transport;response to stimulus;response to stress;signal transduction	cell part;extracellular region		Collagen;Fibrinogen_C	ANTIGEN_BINDING;ATM_DN.V1_DN;CALCIUM_ION_BINDING;CARBOHYDRATE_BINDING;CATION_BINDING;chr9q34;DELACROIX_RAR_TARGETS_UP;DELACROIX_RARG_BOUND_MEF;DURCHDEWALD_SKIN_CARCINOGENESIS_DN;ESTABLISHMENT_OF_LOCALIZATION;FLECHNER_BIOPSY_KIDNEY_TRANSPLANT_REJECTED_VS_OK_UP;FULCHER_INFLAMMATORY_RESPONSE_LECTIN_VS_LPS_DN;GAL_LEUKEMIC_STEM_CELL_DN;GNF2_CARD15;GNF2_CASP1;GNF2_CD14;GNF2_CD1D;GNF2_CD33;GNF2_FOS;GNF2…	3D-structure;Calcium;Cellmembrane;Collagen;Completeproteome;Directproteinsequencing;Disulfidebond;Glycoprotein;Immunity;Innateimmunity;Lectin;Membrane;Metal-binding;Polymorphism;Referenceproteome;Repeat;Secreted;Signal		17	17	17	60.1	60.1	60.1	35.078	0	323.31	4060500000	3856900000	203660000	O00602	O00602	Ficolin-1	FCN1	293
0.0805883	-0.354389	-0.0770808	0.140112	-0.146122	-0.334368	-0.0416211	0.0286798	-0.379029	0.0020848	-0.147597	0.183697	-0.149145	0.0310831	-0.111301	-0.284051	-0.0299527	0.04	0.402873	-0.0770808	-0.0299527	0.0471281	0.412882	biological regulation;cell surface receptor linked signaling pathway;cellular process;cellular response to chemical stimulus;cellular response to cytokine stimulus;cellular response to organic substance;cellular response to stimulus;cytokine-mediated signaling pathway;establishment of localization;establishment of localization in cell;establishment of protein localization;intracellular protein tr…	protein transporter activity;substrate-specific transporter activity;transporter activity	cell part;cytoplasmic part;cytosol;extracellular membrane-bounded organelle;extracellular organelle;extracellular region part;extracellular vesicular exosome;intracellular organelle part;intracellular part;membrane-bounded organelle;membrane-bounded vesicle;nuclear part;nucleoplasm;organelle;organelle part;vesicle	biological regulation;cellular process;establishment of localization;nuclear transport;nucleocytoplasmic transport;protein targeting;protein transport;response to chemical stimulus;response to oxidative stress;response to stimulus;response to stress;signal transduction;transport	cell part;cytosol;extracellular organelle;nucleoplasm;organelle;vesicle		Arm;IBB	AATGTGA,MIR-23A,MIR-23B;ACACTGG,MIR-199A,MIR-199B;ACTGTAG,MIR-139;AGCYRWTTC_UNKNOWN;ATACCTC,MIR-202;ATGTACA,MIR-493;BLUM_RESPONSE_TO_SALIRASIB_UP;BRUINS_UVC_RESPONSE_LATE;CAATGCA,MIR-33;CELLULAR_LOCALIZATION;chr3q25;CSR_EARLY_UP.V1_UP;CTTTGCA,MIR-527;CTTTGTA,MIR-524;DIAZ_CHRONIC_MEYLOGENOUS_LEUKEMIA_UP;DING_LUNG_CANCER_EXPRESSION_BY_COPY_NUMBER;EIF4E_DN;ELVIDGE_HYPOXIA_DN;ENK_UV_RESPONSE_EPIDERMI…	3D-structure;Acetylation;Completeproteome;Cytoplasm;Nucleus;Phosphoprotein;Proteintransport;Referenceproteome;Repeat;Transport		19	19	13	49.3	49.3	41.1	57.886	0	323.31	6892700000	4090300000	2802400000	O00629	O00629	Importin subunit alpha-3	KPNA4	295
0.0927999	0.715408	1.20824	-0.591816	-0.578574	0.807255	-0.213181	-0.117705	0.755794	-0.903957	1.10405	0.94305	1.10115	-0.258678	0.894836	-0.410101	0.329542	1.30363	0.524027	0.0927999	0.894836	0.802036	0.000490153	biological regulation;catabolic process;cell surface receptor linked signaling pathway;cellular catabolic process;cellular macromolecule catabolic process;cellular macromolecule metabolic process;cellular metabolic process;cellular process;cellular protein metabolic process;cellular response to chemical stimulus;cellular response to cytokine stimulus;cellular response to interferon-gamma;cellular…	binding;catalytic activity;cation binding;ion binding;ligase activity;metal ion binding;molecular transducer activity;signal transducer activity;transition metal ion binding;zinc ion binding	cell part;cytoplasmic part;cytosol;intracellular part	biological regulation;catabolic process;cellular metabolic process;cellular process;macromolecule metabolic process;macromolecule modification;metabolic process;primary metabolic process;protein metabolic process;protein modification by small protein conjugation or removal;protein modification process;proteolysis;proteolysis involved in cellular protein catabolic process;response to chemical stim…	cell part;cytosol		PRY;SPRY;zf-B_box	ACEVEDO_LIVER_CANCER_UP;BLALOCK_ALZHEIMERS_DISEASE_INCIPIENT_UP;BLALOCK_ALZHEIMERS_DISEASE_UP;CAMP_UP.V1_UP;CHEMNITZ_RESPONSE_TO_PROSTAGLANDIN_E2_DN;chr6p21;ENK_UV_RESPONSE_KERATINOCYTE_DN;GABRIELY_MIR21_TARGETS;GAZDA_DIAMOND_BLACKFAN_ANEMIA_ERYTHROID_UP;GAZDA_DIAMOND_BLACKFAN_ANEMIA_MYELOID_UP;GNF2_CD48;GNF2_SELL;GNF2_STAT6;GNF2_VAV1;GOZGIT_ESR1_TARGETS_DN;GSE12366_GC_VS_NAIVE_BCELL_DN;GSE13411_…	Completeproteome;Immunity;Innateimmunity;Ligase;Metal-binding;Phosphoprotein;Polymorphism;Referenceproteome;Ublconjugationpathway;Zinc;Zinc-finger		9	9	9	21.5	21.5	21.5	53.415	0	23.939	372580000	217240000	155350000	O00635	O00635	Tripartite motif-containing protein 38	TRIM38	296
-0.574576	-0.506527	-0.0278954	0.0940804	-0.681566	-0.088095	-0.0826133	-0.0820836	-0.422141	-0.703867	-0.218054	-0.491818	-0.314024	-0.124313	-0.212531	-0.360038	0.044437	-0.574171	0.60292	-0.088095	-0.314024	-0.225929	0.182178	cell cycle process;cellular macromolecule metabolic process;cellular metabolic process;cellular process;cellular protein metabolic process;dephosphorylation;G1/S transition of mitotic cell cycle;macromolecule metabolic process;macromolecule modification;metabolic process;phosphate-containing compound metabolic process;phosphorus metabolic process;primary metabolic process;protein dephosphorylatio…	binding;catalytic activity;cation binding;hydrolase activity;hydrolase activity, acting on ester bonds;ion binding;metal ion binding;phosphatase activity;phosphoprotein phosphatase activity;phosphoric ester hydrolase activity;protein serine/threonine phosphatase activity	cell part;cytoplasmic part;cytosol;intracellular part	cellular metabolic process;cellular process;macromolecule metabolic process;macromolecule modification;metabolic process;phosphorus metabolic process;primary metabolic process;protein dephosphorylation;protein metabolic process;protein modification process	cell part;cytosol		Metallophos	ACTAYRNNNCCCR_UNKNOWN;AGCACTT,MIR-93,MIR-302A,MIR-302B,MIR-302C,MIR-302D,MIR-372,MIR-373,MIR-520E,MIR-520A,MIR-526B,MIR-520B,MIR-520C,MIR-520D;ALFANO_MYC_TARGETS;ATGCTGC,MIR-103,MIR-107;ATGTAGC,MIR-221,MIR-222;BENPORATH_MYC_MAX_TARGETS;BIOPOLYMER_METABOLIC_PROCESS;BIOPOLYMER_MODIFICATION;BYSTRYKH_HEMATOPOIESIS_STEM_CELL_QTL_TRANS;CACTTTG,MIR-520G,MIR-520H;CARD_MIR302A_TARGETS;CELL_CYCLE_GO_000704…	Acetylation;Alternativesplicing;Cellcycle;Completeproteome;Cytoplasm;Directproteinsequencing;Hydrolase;Manganese;Metal-binding;Proteinphosphatase;Referenceproteome	TNF-alpha/NF-kappa B signaling complex (CHUK, BTRC, NFKB2, PPP6C, REL, CUL1, IKBKE, SAPS2, SAPS1, ANKRD28, RELA, SKP1)	15	15	15	64.3	64.3	64.3	35.144	0	152.46	5130200000	2866700000	2263500000	O00743;O00743-2;O00743-3	O00743;O00743-2;O00743-3	Serine/threonine-protein phosphatase 6 catalytic subunit;Serine/threonine-protein phosphatase 6 catalytic subunit, N-terminally processed	PPP6C	297
0.430963	-0.682707	-0.781798	-0.124619	-0.548493	1.13266	-1.04071	-0.995796	0.0585996	-0.985931	-0.293517	0.0391737	0.450008	-1.07749	-1.02512	-1.07457	0.575357	-0.10195	0.755053	-0.548493	-0.293517	0.254976	0.142976	alcohol metabolic process;carbohydrate metabolic process;cellular carbohydrate metabolic process;cellular macromolecule metabolic process;cellular metabolic process;cellular process;cellular protein metabolic process;hexose metabolic process;macromolecule metabolic process;macromolecule modification;mannose metabolic process;metabolic process;monosaccharide metabolic process;primary metabolic pro…	alpha-mannosidase activity;binding;carbohydrate binding;catalytic activity;cation binding;hydrolase activity;hydrolase activity, acting on glycosyl bonds;hydrolase activity, hydrolyzing O-glycosyl compounds;ion binding;mannosidase activity;metal ion binding;transition metal ion binding;zinc ion binding	cell part;cytoplasmic part;extracellular membrane-bounded organelle;extracellular organelle;extracellular region part;extracellular vesicular exosome;intracellular membrane-bounded organelle;intracellular organelle;intracellular part;lysosome;lytic vacuole;membrane-bounded organelle;membrane-bounded vesicle;organelle;vacuole;vesicle	alcohol metabolic process;carbohydrate metabolic process;cellular metabolic process;cellular process;macromolecule metabolic process;macromolecule modification;metabolic process;primary metabolic process;protein metabolic process;protein modification process;small molecule metabolic process	cell part;extracellular organelle;intracellular membrane-bounded organelle;intracellular organelle;lysosome;organelle;vacuole;vesicle	Lysosome;Other glycan degradation	Alpha-mann_mid;Glyco_hydro_38;Glyco_hydro_38C	ACEVEDO_LIVER_TUMOR_VS_NORMAL_ADJACENT_TISSUE_UP;BIDUS_METASTASIS_DN;BIOPOLYMER_METABOLIC_PROCESS;BIOPOLYMER_MODIFICATION;BLALOCK_ALZHEIMERS_DISEASE_UP;CAGCTG_V$AP4_Q5;CELLULAR_MACROMOLECULE_METABOLIC_PROCESS;CELLULAR_PROTEIN_METABOLIC_PROCESS;CHEN_METABOLIC_SYNDROM_NETWORK;CHIARADONNA_NEOPLASTIC_TRANSFORMATION_KRAS_DN;DANG_REGULATED_BY_MYC_DN;DIRMEIER_LMP1_RESPONSE_EARLY;GCNP_SHH_UP_EARLY.V1_DN;…	Alternativesplicing;Completeproteome;Directproteinsequencing;Diseasemutation;Disulfidebond;Glycoprotein;Glycosidase;Hydrolase;Lysosome;Metal-binding;Polymorphism;Referenceproteome;Signal;Zinc;Zymogen		40	40	40	52.5	52.5	52.5	113.61	0	323.31	25952000000	15321000000	10631000000	O00754-2;O00754	O00754-2;O00754	Lysosomal alpha-mannosidase;Lysosomal alpha-mannosidase A peptide;Lysosomal alpha-mannosidase B peptide;Lysosomal alpha-mannosidase C peptide;Lysosomal alpha-mannosidase D peptide;Lysosomal alpha-mannosidase E peptide	MAN2B1	299
NaN	-1.52293	-2.1349	NaN	-2.61817	-2.45769	-3.14215	NaN	-0.593795	-2.16303	-2.9268	-2.06958	NaN	-2.1501	NaN	-2.03246	-0.704146	-0.961754	0.64927	-2.2963	-2.06958	0.226713	0.170578	activation of anaphase-promoting complex activity;anaphase-promoting complex-dependent proteasomal ubiquitin-dependent protein catabolic process;biological regulation;catabolic process;cell cycle;cell cycle checkpoint;cell cycle process;cell division;cellular catabolic process;cellular component assembly;cellular component assembly at cellular level;cellular component organization;cellular compon…	acid-amino acid ligase activity;adenyl nucleotide binding;adenyl ribonucleotide binding;ATP binding;binding;catalytic activity;enzyme binding;ligase activity;ligase activity, forming carbon-nitrogen bonds;nucleotide binding;protein binding;purine nucleotide binding;purine ribonucleoside triphosphate binding;purine ribonucleotide binding;ribonucleotide binding;small conjugating protein ligase acti…	anaphase-promoting complex;cell part;cullin-RING ubiquitin ligase complex;cytoplasm;cytoplasmic part;cytosol;intracellular organelle part;intracellular part;macromolecular complex;nuclear part;nuclear ubiquitin ligase complex;nucleoplasm;organelle part;protein complex;ubiquitin ligase complex	biological regulation;catabolic process;cell cycle;cell division;cellular component assembly;cellular component organization;cellular macromolecular complex assembly;cellular metabolic process;cellular process;macromolecular complex assembly;macromolecule metabolic process;macromolecule modification;metabolic process;mitotic cell cycle;primary metabolic process;protein complex assembly;protein me…	cell part;cytoplasm;cytosol;macromolecular complex;nucleoplasm;protein complex;ubiquitin ligase complex	Ubiquitin mediated proteolysis	UQ_con	AACTTT_UNKNOWN;ACID_AMINO_ACID_LIGASE_ACTIVITY;AKT_UP.V1_UP;ALCALAY_AML_BY_NPM1_LOCALIZATION_DN;AMUNDSON_GAMMA_RADIATION_RESPONSE;BARIS_THYROID_CANCER_DN;BASAKI_YBX1_TARGETS_UP;BENPORATH_CYCLING_GENES;BENPORATH_SOX2_TARGETS;BIDUS_METASTASIS_UP;BIOPOLYMER_CATABOLIC_PROCESS;BIOPOLYMER_METABOLIC_PROCESS;BIOPOLYMER_MODIFICATION;BLALOCK_ALZHEIMERS_DISEASE_UP;BLUM_RESPONSE_TO_SALIRASIB_DN;BOHN_PRIMARY_…	3D-structure;Acetylation;Alternativesplicing;ATP-binding;Cellcycle;Celldivision;Completeproteome;Ligase;Mitosis;Nucleotide-binding;Phosphoprotein;Polymorphism;Referenceproteome;Ublconjugation;Ublconjugationpathway		4	4	4	49.3	49.3	49.3	15.765	0	18.447	234990000	62001000	172990000	O00762-2;O00762;O00762-3;O00762-4	O00762-2;O00762;O00762-3	Ubiquitin-conjugating enzyme E2 C	UBE2C	301
-1.74642	-0.484163	0.433231	0.441828	-0.987604	-0.562722	-2.20784	0.0437557	-0.994003	-1.23036	0.918659	0.331021	-1.18486	-0.603992	0.426057	-0.86289	0.0740585	-1.46082	0.52111	-0.562722	-0.603992	-0.0412694	0.443403	biosynthetic process;cell proliferation;cellular biosynthetic process;cellular metabolic compound salvage;cellular metabolic process;cellular process;coenzyme biosynthetic process;coenzyme metabolic process;cofactor biosynthetic process;cofactor metabolic process;heterocycle metabolic process;metabolic process;pyridoxal 5'-phosphate salvage;pyridoxal phosphate biosynthetic process;pyridoxal phosp…	adenyl nucleotide binding;adenyl ribonucleotide binding;alkali metal ion binding;ATP binding;binding;catalytic activity;cation binding;cofactor binding;identical protein binding;ion binding;kinase activity;lithium ion binding;magnesium ion binding;metal ion binding;nucleotide binding;phosphotransferase activity, alcohol group as acceptor;potassium ion binding;protein binding;protein dimerization …	cell part;cytoplasm;cytoplasmic part;cytosol;extracellular membrane-bounded organelle;extracellular organelle;extracellular region part;extracellular vesicular exosome;intracellular membrane-bounded organelle;intracellular organelle;intracellular organelle part;intracellular part;membrane-bounded organelle;membrane-bounded vesicle;nuclear part;nucleoplasm;nucleus;organelle;organelle part;vesicle	biosynthetic process;cell proliferation;cellular metabolic compound salvage;cellular metabolic process;cellular process;cofactor metabolic process;heterocycle metabolic process;metabolic process;small molecule metabolic process;vitamin metabolic process	cell part;cytoplasm;cytosol;extracellular organelle;intracellular membrane-bounded organelle;intracellular organelle;nucleoplasm;nucleus;organelle;vesicle	Vitamin B6 metabolism	PfkB	ACEVEDO_LIVER_CANCER_DN;ACEVEDO_NORMAL_TISSUE_ADJACENT_TO_LIVER_TUMOR_DN;BROWNE_HCMV_INFECTION_4HR_DN;BRUINS_UVC_RESPONSE_LATE;BYSTRYKH_HEMATOPOIESIS_STEM_CELL_QTL_TRANS;CAIRO_HEPATOBLASTOMA_UP;CCTGTGA,MIR-513;chr21q22;CREIGHTON_ENDOCRINE_THERAPY_RESISTANCE_5;CYTOPLASM;DER_IFN_ALPHA_RESPONSE_UP;DER_IFN_BETA_RESPONSE_UP;DOANE_RESPONSE_TO_ANDROGEN_UP;FIRESTEIN_PROLIFERATION;GAZDA_DIAMOND_BLACKFAN_A…	3D-structure;Acetylation;Alternativesplicing;ATP-binding;Completeproteome;Cytoplasm;Kinase;Metal-binding;Nucleotide-binding;Phosphoprotein;Referenceproteome;Transferase;Zinc	DNA repair complex NEIL1-PNK-Pol(beta)-LigIII(alpha)-XRCC1;DNA repair complex NEIL2-PNK-Pol(beta)-LigIII(alpha)-XRCC1	11	11	11	56.4	56.4	56.4	35.102	0	153.78	2534000000	1473000000	1061000000	O00764;O00764-2;O00764-3	O00764;O00764-2;O00764-3	Pyridoxal kinase	PDXK	302
-3.96709	-5.66914	-2.75006	-5.16401	-2.81071	-3.47383	NaN	-4.3146	-1.76588	-4.72735	NaN	-5.72054	-3.77282	-4.1186	NaN	NaN	-4.79387	-3.35534	0.264377	-3.72046	-4.42298	-0.702515	0.0019831	biosynthetic process;carboxylic acid biosynthetic process;carboxylic acid metabolic process;cellular biosynthetic process;cellular ketone metabolic process;cellular lipid metabolic process;cellular metabolic process;cellular process;fatty acid biosynthetic process;fatty acid metabolic process;lipid biosynthetic process;lipid metabolic process;metabolic process;monocarboxylic acid metabolic proces…	binding;catalytic activity;cation binding;CoA desaturase activity;ion binding;iron ion binding;metal ion binding;oxidoreductase activity;oxidoreductase activity, acting on paired donors, with incorporation or reduction of molecular oxygen;oxidoreductase activity, acting on paired donors, with oxidation of a pair of donors resulting in the reduction of molecular oxygen to two molecules of water;st…	cell part;cytoplasmic part;endoplasmic reticulum;endoplasmic reticulum membrane;endoplasmic reticulum part;integral to membrane;intracellular membrane-bounded organelle;intracellular organelle;intracellular organelle part;intracellular part;intrinsic to membrane;membrane;membrane part;membrane-bounded organelle;organelle;organelle membrane;organelle part	biosynthetic process;cellular ketone metabolic process;cellular lipid metabolic process;cellular metabolic process;cellular process;lipid metabolic process;metabolic process;organic acid metabolic process;primary metabolic process;small molecule metabolic process	cell part;endoplasmic reticulum;intracellular membrane-bounded organelle;intracellular organelle;membrane;organelle	Biosynthesis of unsaturated fatty acids;PPAR signaling pathway	FA_desaturase	ACEVEDO_LIVER_CANCER_DN;ACEVEDO_NORMAL_TISSUE_ADJACENT_TO_LIVER_TUMOR_DN;ALONSO_METASTASIS_UP;AMIT_EGF_RESPONSE_20_MCF10A;AMIT_SERUM_RESPONSE_60_MCF10A;ATF2_UP.V1_DN;BASAKI_YBX1_TARGETS_DN;BENPORATH_MYC_MAX_TARGETS;BORLAK_LIVER_CANCER_EGF_UP;BRUNO_HEMATOPOIESIS;BURTON_ADIPOGENESIS_5;BURTON_ADIPOGENESIS_6;CAGTATT,MIR-200B,MIR-200C,MIR-429;CAIRO_HEPATOBLASTOMA_UP;CASORELLI_ACUTE_PROMYELOCYTIC_LEUKE…	Completeproteome;Directproteinsequencing;Endoplasmicreticulum;Fattyacidbiosynthesis;Fattyacidmetabolism;Iron;Lipidbiosynthesis;Lipidmetabolism;Membrane;Oxidoreductase;Phosphoprotein;Polymorphism;Referenceproteome;Transmembrane;Transmembranehelix		5	5	5	20.9	20.9	20.9	41.522	0	58.231	575090000	39137000	535950000	O00767	O00767	Acyl-CoA desaturase	SCD	303
0.668236	0.744018	-0.110443	0.0389477	0.649747	0.471808	1.1853	0.307218	0.608907	0.931455	0.347261	0.308843	0.393371	0.349434	0.492244	0.744744	0.371661	0.868645	0.862471	0.608907	0.393371	-0.215537	0.193778	anatomical structure development;anatomical structure formation involved in morphogenesis;androgen receptor signaling pathway;ATP-dependent chromatin remodeling;biological regulation;biosynthetic process;blood vessel development;cardiac chamber development;cellular biosynthetic process;cellular component disassembly;cellular component disassembly at cellular level;cellular component organization;…	binding;DNA binding;ligand-dependent nuclear receptor binding;nucleic acid binding;protein binding;protein binding transcription factor activity;receptor binding;transcription coactivator activity;transcription cofactor activity;transcription factor binding transcription factor activity	cell part;chromatin;chromatin remodeling complex;chromosomal part;intracellular membrane-bounded organelle;intracellular organelle;intracellular organelle part;intracellular part;macromolecular complex;membrane-bounded organelle;nBAF complex;npBAF complex;nuclear chromatin;nuclear chromosome part;nuclear part;nucleoplasm;nucleus;organelle;organelle part;protein complex;SWI/SNF complex;SWI/SNF-typ…	anatomical structure development;anatomical structure formation involved in morphogenesis;biological regulation;biosynthetic process;cellular component disassembly;cellular component organization;cellular metabolic process;cellular nitrogen compound metabolic process;cellular process;chromatin modification;chromatin organization;chromosome organization;developmental process;macromolecule metaboli…	cell part;chromatin remodeling complex;intracellular membrane-bounded organelle;intracellular organelle;macromolecular complex;nucleoplasm;nucleus;organelle;protein complex		ARID;DUF3518	AAAYRNCTG_UNKNOWN;AACTTT_UNKNOWN;ACACTGG,MIR-199A,MIR-199B;ACCAAAG,MIR-9;AGCTCCT,MIR-28;AGGGCAG,MIR-18A;ANDROGEN_RECEPTOR_SIGNALING_PATHWAY;ATAAGCT,MIR-21;ATACTGT,MIR-144;ATGTACA,MIR-493;ATGTAGC,MIR-221,MIR-222;BENPORATH_EED_TARGETS;BIOPOLYMER_METABOLIC_PROCESS;BLALOCK_ALZHEIMERS_DISEASE_INCIPIENT_UP;BLALOCK_ALZHEIMERS_DISEASE_UP;BRUINS_UVC_RESPONSE_EARLY_LATE;BURTON_ADIPOGENESIS_12;BYSTRYKH_HEMA…	3D-structure;Acetylation;Alternativesplicing;Chromatinregulator;Completeproteome;Directproteinsequencing;DNA-binding;Mentalretardation;Neurogenesis;Nucleus;Phosphoprotein;Polymorphism;Referenceproteome;Transcription;Transcriptionregulation	BAF complex;BRG1-associated complex;Brg1-associated complex I;Brg1-associated complex II;BRG1-SIN3A complex;BRG1-SIN3A-HDAC containing SWI/SNF remodeling complex I;Brm-associated complex;BRM-associated complex;BRM-SIN3A complex;BRM-SIN3A-HDAC complex;EBAFa complex;LARC complex (LCR-associated remodeling complex);NUMAC complex (nucleosomal methylation activator complex);p300-CBP-p270 complex;p300-…	56	56	53	33.8	33.8	32.1	242.04	0	323.31	4689700000	3119200000	1570400000	O14497;O14497-2;O14497-3	O14497;O14497-2;O14497-3	AT-rich interactive domain-containing protein 1A	ARID1A	305
0.408563	0.545087	-0.801636	-0.787328	0.977834	0.157234	0.893057	-0.310258	0.0823017	0.223293	0.538154	-0.368891	-0.194922	NaN	0.169494	1.27879	0.00756181	0.249132	0.706893	0.157234	0.196393	0.0391595	0.425569	biological regulation;biosynthetic process;cell cycle;cellular biosynthetic process;cellular macromolecule biosynthetic process;cellular macromolecule metabolic process;cellular metabolic process;cellular nitrogen compound metabolic process;cellular process;DNA metabolic process;DNA replication;DNA-dependent DNA replication;macromolecule biosynthetic process;macromolecule metabolic process;metabo…	binding;DNA polymerase binding;enzyme binding;protein binding	cell part;cytoplasmic part;intracellular membrane-bounded organelle;intracellular organelle;intracellular part;membrane-bounded organelle;nucleus;organelle;perinuclear region of cytoplasm	biological regulation;biosynthetic process;cell cycle;cellular metabolic process;cellular nitrogen compound metabolic process;cellular process;DNA metabolic process;DNA replication;macromolecule metabolic process;metabolic process;nitrogen compound metabolic process;nucleobase-containing compound metabolic process;primary metabolic process;regulation of protein modification process	cell part;intracellular membrane-bounded organelle;intracellular organelle;nucleus;organelle		CDK2AP	AAANWWTGC_UNKNOWN;AACTTT_UNKNOWN;ACEVEDO_LIVER_TUMOR_VS_NORMAL_ADJACENT_TISSUE_UP;ACEVEDO_NORMAL_TISSUE_ADJACENT_TO_LIVER_TUMOR_DN;ACTGCAG,MIR-17-3P;ALFANO_MYC_TARGETS;AMBROSINI_FLAVOPIRIDOL_TREATMENT_TP53;ARGGGTTAA_UNKNOWN;BASAKI_YBX1_TARGETS_UP;BIDUS_METASTASIS_UP;BIOPOLYMER_METABOLIC_PROCESS;BIOPOLYMER_MODIFICATION;BLALOCK_ALZHEIMERS_DISEASE_INCIPIENT_UP;BLALOCK_ALZHEIMERS_DISEASE_UP;BLUM_RESP…	3D-structure;Alternativesplicing;Cellcycle;Completeproteome;Disulfidebond;Phosphoprotein;Referenceproteome;Tumorsuppressor		4	4	4	65.5	65.5	65.5	9.6008	0	17.766	387550000	250620000	136940000	O14519-2;O14519;O75956	O14519-2;O14519;O75956	Cyclin-dependent kinase 2-associated protein 1;Cyclin-dependent kinase 2-associated protein 2	CDK2AP1;CDK2AP2	306
0.746471	0.136239	0.163289	0.0876814	0.896798	0.249544	0.059473	-0.090705	0.068734	-0.281483	-0.150565	0.951494	0.794434	0.17545	0.994888	-0.112248	-0.00205982	0.650036	0.706958	0.136239	0.17545	0.039211	0.425487	acetyl-CoA catabolic process;acetyl-CoA metabolic process;biological regulation;catabolic process;cellular catabolic process;cellular metabolic process;cellular process;cellular response to chemical stimulus;cellular response to hypoxia;cellular response to oxygen levels;cellular response to stimulus;cellular response to stress;coenzyme catabolic process;coenzyme metabolic process;cofactor catabo…	binding;catalytic activity;cation binding;cofactor binding;electron carrier activity;heme binding;ion binding;iron ion binding;metal ion binding;oxidoreductase activity;oxidoreductase activity, acting on the CH-CH group of donors;quinone binding;succinate dehydrogenase activity;tetrapyrrole binding;transition metal ion binding;ubiquinone binding	cell part;cytoplasmic part;envelope;fumarate reductase complex;integral to membrane;intracellular membrane-bounded organelle;intracellular organelle;intracellular organelle part;intracellular part;intrinsic to membrane;macromolecular complex;membrane;membrane part;membrane-bounded organelle;mitochondrial envelope;mitochondrial inner membrane;mitochondrial membrane;mitochondrial membrane part;mito…	biological regulation;catabolic process;cellular metabolic process;cellular process;cofactor metabolic process;generation of precursor metabolites and energy;metabolic process;regulation of transport;response to chemical stimulus;response to stimulus;response to stress;small molecule metabolic process	cell part;intracellular membrane-bounded organelle;intracellular organelle;macromolecular complex;membrane;mitochondrial envelope;mitochondrion;organelle;protein complex	Alzheimer's disease;Citrate cycle (TCA cycle);Huntington's disease;Oxidative phosphorylation;Parkinson's disease		AEROBIC_RESPIRATION;ALONSO_METASTASIS_UP;BENPORATH_SOX2_TARGETS;BIOCARTA_ETC_PATHWAY;BLALOCK_ALZHEIMERS_DISEASE_DN;BURTON_ADIPOGENESIS_5;CARBOHYDRATE_METABOLIC_PROCESS;CATABOLIC_PROCESS;CELLULAR_CARBOHYDRATE_METABOLIC_PROCESS;CELLULAR_CATABOLIC_PROCESS;CELLULAR_RESPIRATION;chr11q23;COENZYME_METABOLIC_PROCESS;COFACTOR_CATABOLIC_PROCESS;COFACTOR_METABOLIC_PROCESS;CYTOPLASM;CYTOPLASMIC_PART;DAZARD_R…	Alternativesplicing;Completeproteome;Diseasemutation;Electrontransport;Heme;Iron;Membrane;Metal-binding;Mitochondrion;Mitochondrioninnermembrane;Polymorphism;Referenceproteome;Transitpeptide;Transmembrane;Transmembranehelix;Transport;Tricarboxylicacidcycle		3	3	3	35.8	35.8	35.8	12.615	0	16.503	494620000	337600000	157020000	O14521-2;O14521;O14521-4	O14521-2;O14521	Succinate dehydrogenase [ubiquinone] cytochrome b small subunit, mitochondrial	SDHD	307
0.281909	0.337463	0.51575	0.966331	NaN	NaN	NaN	NaN	0.133898	NaN	0.973969	0.817562	NaN	0.0633319	0.841028	-0.476331	-0.269678	NaN	0.690384	0.337463	0.440447	0.102984	0.327174	cellular component assembly;cellular component assembly at cellular level;cellular component organization;cellular component organization at cellular level;cellular component organization or biogenesis;cellular component organization or biogenesis at cellular level;cellular macromolecular complex assembly;cellular macromolecular complex subunit organization;cellular membrane organization;cellular…	AP-2 adaptor complex binding;binding;protein binding;protein complex binding	cell part;coated pit;membrane;membrane part;plasma membrane	cellular component assembly;cellular component organization;cellular macromolecular complex assembly;cellular membrane organization;cellular process;endocytosis;establishment of localization;macromolecular complex assembly;membrane invagination;membrane organization;organelle organization;protein complex assembly;transport;vesicle organization;vesicle-mediated transport	cell part;membrane;plasma membrane		FCH;muHD	BHAT_ESR1_TARGETS_VIA_AKT1_UP;BONOME_OVARIAN_CANCER_POOR_SURVIVAL_DN;BONOME_OVARIAN_CANCER_SURVIVAL_SUBOPTIMAL_DEBULKING;BRUINS_UVC_RESPONSE_VIA_TP53_GROUP_D;chr19p13;DASU_IL6_SIGNALING_SCAR_UP;DASU_IL6_SIGNALING_UP;E2F1_UP.V1_DN;GSE11864_CSF1_VS_CSF1_IFNG_IN_MAC_DN;GSE11924_TFH_VS_TH17_CD4_TCELL_UP;GSE12366_PLASMA_CELL_VS_NAIVE_BCELL_DN;GSE12845_IGD_POS_VS_NEG_BLOOD_BCELL_UP;GSE17721_0.5H_VS_24H…	Alternativesplicing;Coatedpit;Coiledcoil;Completeproteome;Endocytosis;Membrane;Phosphoprotein;Referenceproteome		10	10	10	19.3	19.3	19.3	96.627	0	35.981	240330000	158570000	81761000	O14526-2;O14526;O14526-3	O14526-2;O14526;O14526-3	FCH domain only protein 1	FCHO1	309
-1.4578	-1.57961	-0.6537	-1.1323	-1.20573	-1.29563	-1.09915	-0.809353	-1.17423	-1.25079	-1.26508	-1.43416	-1.65115	-1.00515	-1.8051	-1.06396	-1.13878	-1.4724	0.176213	-1.17423	-1.26508	-0.0908557	0.364031	biological regulation;cell redox homeostasis;cellular homeostasis;cellular process;homeostatic process;regulation of biological process;regulation of biological quality;regulation of cellular process		cell part;centrosome;cytoplasm;cytoplasmic part;cytoskeletal part;intracellular membrane-bounded organelle;intracellular non-membrane-bounded organelle;intracellular organelle;intracellular organelle part;intracellular part;membrane-bounded organelle;microtubule organizing center;midbody;non-membrane-bounded organelle;nucleus;organelle;organelle part	biological regulation;cellular homeostasis;cellular process;homeostatic process	cell part;centrosome;cytoplasm;intracellular membrane-bounded organelle;intracellular non-membrane-bounded organelle;intracellular organelle;microtubule organizing center;midbody;nucleus;organelle		Thioredoxin	BENPORATH_CYCLING_GENES;BLALOCK_ALZHEIMERS_DISEASE_DN;BROCKE_APOPTOSIS_REVERSED_BY_IL6;chr2q11;DIAZ_CHRONIC_MEYLOGENOUS_LEUKEMIA_UP;FLECHNER_BIOPSY_KIDNEY_TRANSPLANT_OK_VS_DONOR_UP;GARY_CD5_TARGETS_DN;GSE10239_KLRG1INT_VS_KLRG1HIGH_EFF_CD8_TCELL_DN;GSE11864_UNTREATED_VS_CSF1_IFNG_IN_MAC_DN;GSE11864_UNTREATED_VS_CSF1_IFNG_PAM3CYS_IN_MAC_DN;GSE11864_UNTREATED_VS_CSF1_PAM3CYS_IN_MAC_DN;GSE12845_NAIV…	Alternativesplicing;Completeproteome;Phosphoprotein;Polymorphism;Referenceproteome		5	5	5	23.9	23.9	23.9	22.199	0	9.638	336910000	134890000	202020000	O14530-2;O14530	O14530-2;O14530	Thioredoxin domain-containing protein 9	TXNDC9	310
1.43516	1.8935	0.752462	0.888833	1.23866	0.695322	1.83367	0.792263	0.242271	0.182641	0.680684	1.66939	1.51498	1.53012	0.518302	0.855917	-0.506725	0.939554	0.389657	0.888833	0.855917	-0.0329168	0.457095	biosynthetic process;cellular biosynthetic process;cellular macromolecule metabolic process;cellular metabolic process;cellular nitrogen compound metabolic process;cellular process;electron transport chain;gene expression;generation of precursor metabolites and energy;macromolecule metabolic process;metabolic process;nitrogen compound metabolic process;nucleic acid metabolic process;nucleobase-co…	catalytic activity;cation transmembrane transporter activity;cytochrome-c oxidase activity;heme-copper terminal oxidase activity;hydrogen ion transmembrane transporter activity;inorganic cation transmembrane transporter activity;ion transmembrane transporter activity;monovalent inorganic cation transmembrane transporter activity;oxidoreductase activity;oxidoreductase activity, acting on a heme gr…	cell part;cytoplasmic part;intracellular organelle part;intracellular part;membrane;membrane part;mitochondrial inner membrane;mitochondrial membrane;mitochondrial membrane part;mitochondrial part;mitochondrial respiratory chain;organelle inner membrane;organelle membrane;organelle part;respiratory chain	biosynthetic process;cellular metabolic process;cellular nitrogen compound metabolic process;cellular process;generation of precursor metabolites and energy;macromolecule metabolic process;metabolic process;nitrogen compound metabolic process;nucleobase-containing compound metabolic process;primary metabolic process;RNA metabolic process;small molecule metabolic process;transcription initiation, …	cell part;membrane	Alzheimer's disease;Cardiac muscle contraction;Huntington's disease;Oxidative phosphorylation;Parkinson's disease	COX7a	BENPORATH_MYC_MAX_TARGETS;BILANGES_SERUM_AND_RAPAMYCIN_SENSITIVE_GENES;BLALOCK_ALZHEIMERS_DISEASE_DN;BLALOCK_ALZHEIMERS_DISEASE_INCIPIENT_DN;BLUM_RESPONSE_TO_SALIRASIB_UP;BRUINS_UVC_RESPONSE_VIA_TP53_GROUP_A;BYSTRYKH_HEMATOPOIESIS_STEM_CELL_QTL_TRANS;CATION_TRANSMEMBRANE_TRANSPORTER_ACTIVITY;chr2p21;CYTOCHROME_C_OXIDASE_ACTIVITY;DANG_BOUND_BY_MYC;GOLDRATH_EFF_VS_MEMORY_CD8_TCELL_DN;GOLDRATH_NAIVE…	Acetylation;Completeproteome;Membrane;Mitochondrion;Mitochondrioninnermembrane;Referenceproteome;Transitpeptide		5	5	5	62.3	62.3	62.3	12.615	0	37.64	794030000	615810000	178230000	O14548	O14548	Cytochrome c oxidase subunit 7A-related protein, mitochondrial	COX7A2L	312
0.308887	-0.00526169	-0.676533	-0.381099	0.483916	0.45423	-0.0773306	-0.332355	0.417546	-0.373965	0.053386	-0.321406	0.155935	-0.446643	-0.0655888	-0.405603	0.0230237	0.309417	0.417725	-0.00526169	-0.0655888	-0.0603271	0.41244	biosynthetic process;carboxylic acid biosynthetic process;carboxylic acid metabolic process;cellular biosynthetic process;cellular ketone metabolic process;cellular lipid metabolic process;cellular macromolecule metabolic process;cellular metabolic process;cellular process;cellular protein metabolic process;electron transport chain;fatty acid biosynthetic process;fatty acid metabolic process;gene…	acyl carrier activity;binding;calcium ion binding;carboxylic acid binding;catalytic activity;cation binding;fatty acid binding;ion binding;lipid binding;metal ion binding;monocarboxylic acid binding;NADH dehydrogenase (quinone) activity;NADH dehydrogenase (ubiquinone) activity;NADH dehydrogenase activity;oxidoreductase activity;oxidoreductase activity, acting on NADH or NADPH;oxidoreductase activ…	cell part;cytoplasmic part;intracellular organelle lumen;intracellular organelle part;intracellular part;macromolecular complex;membrane;membrane part;membrane-enclosed lumen;mitochondrial inner membrane;mitochondrial matrix;mitochondrial membrane;mitochondrial membrane part;mitochondrial part;mitochondrial respiratory chain complex I;NADH dehydrogenase complex;organelle inner membrane;organelle …	biosynthetic process;cellular ketone metabolic process;cellular lipid metabolic process;cellular metabolic process;cellular process;generation of precursor metabolites and energy;lipid metabolic process;macromolecule metabolic process;macromolecule modification;metabolic process;organic acid metabolic process;primary metabolic process;protein metabolic process;protein modification process;small m…	cell part;macromolecular complex;membrane;NADH dehydrogenase complex;protein complex	Alzheimer's disease;Huntington's disease;Oxidative phosphorylation;Parkinson's disease	PP-binding	ALONSO_METASTASIS_UP;BASSO_B_LYMPHOCYTE_NETWORK;BHATI_G2M_ARREST_BY_2METHOXYESTRADIOL_UP;BLALOCK_ALZHEIMERS_DISEASE_DN;BURTON_ADIPOGENESIS_5;chr16p12;CTTGTAT,MIR-381;CYTOPLASM;CYTOPLASMIC_PART;DIAZ_CHRONIC_MEYLOGENOUS_LEUKEMIA_UP;ENVELOPE;FLECHNER_BIOPSY_KIDNEY_TRANSPLANT_REJECTED_VS_OK_DN;GOLDRATH_HOMEOSTATIC_PROLIFERATION;GSE13484_12H_VS_3H_YF17D_VACCINE_STIM_PBMC_UP;GSE13484_3H_UNSTIM_VS_YF17D…	3D-structure;Acetylation;Completeproteome;Directproteinsequencing;Electrontransport;Fattyacidbiosynthesis;Fattyacidmetabolism;Lipidbiosynthesis;Lipidmetabolism;Mitochondrion;Phosphopantetheine;Phosphoprotein;Referenceproteome;Respiratorychain;Transitpeptide;Transport	Respiratory chain complex I (beta subunit) mitochondrial;Respiratory chain complex I (holoenzyme), mitochondrial	7	7	7	23.7	23.7	23.7	17.417	0	78.376	4921700000	2792900000	2128800000	O14561	O14561	Acyl carrier protein, mitochondrial	NDUFAB1	314
1.09884	0.167124	0.548584	0.702947	0.58065	1.20838	0.463428	NaN	1.2933	0.131226	0.809812	1.05022	0.765665	0.366069	0.884173	-0.113986	NaN	1.02739	0.505029	0.641798	0.787739	0.14594	0.266721	metabolic process;oxidation-reduction process	binding;cation binding;ion binding;metal ion binding	cell part;integral to membrane;intrinsic to membrane;membrane part	metabolic process	cell part		Cytochrom_B561	ACEVEDO_LIVER_CANCER_UP;ACTAYRNNNCCCR_UNKNOWN;BENPORATH_MYC_MAX_TARGETS;chr3p21;DANG_BOUND_BY_MYC;DODD_NASOPHARYNGEAL_CARCINOMA_UP;GSE12845_NAIVE_VS_PRE_GC_TONSIL_BCELL_UP;GSE17721_0.5H_VS_12H_PAM3CSK4_BMDM_UP;GSE17721_LPS_VS_POLYIC_24H_BMDM_UP;GSE20715_0H_VS_24H_OZONE_TLR4_KO_LUNG_UP;GSE22886_CD8_TCELL_VS_BCELL_NAIVE_UP;GSE24634_NAIVE_CD4_TCELL_VS_DAY7_IL4_CONV_TREG_DN;GSE29617_CTRL_VS_DAY3_TIV_…	Completeproteome;Directproteinsequencing;Electrontransport;Heme;Iron;Membrane;Metal-binding;Referenceproteome;Transmembrane;Transmembranehelix;Transport		1	1	1	5.4	5.4	5.4	23.973	0	22.018	780230000	568470000	211750000	O14569	O14569	Cytochrome b561 domain-containing protein 2	CYB561D2	316
-0.157949	-0.546381	0.0334321	-0.0835196	-0.357633	-0.419553	-0.659296	-0.465086	-0.613355	-0.268369	-0.304614	-0.414958	-0.18227	-0.246781	-0.34967	-0.379688	-0.510842	-0.120787	0.558197	-0.419553	-0.304614	0.114939	0.309792	cellular component organization;cellular component organization at cellular level;cellular component organization or biogenesis;cellular component organization or biogenesis at cellular level;cellular process;COPI coating of Golgi vesicle;ER to Golgi vesicle-mediated transport;establishment of localization;establishment of localization in cell;establishment of protein localization;Golgi transport…	structural molecule activity	cell part;COPI vesicle coat;cytoplasmic part;cytoplasmic vesicle part;cytosol;Golgi apparatus;Golgi apparatus part;intracellular membrane-bounded organelle;intracellular organelle;intracellular organelle part;intracellular part;macromolecular complex;membrane coat;membrane part;membrane-bounded organelle;nuclear part;nucleoplasm;organelle;organelle part;protein complex;vesicle coat	cellular component organization;cellular process;establishment of localization;Golgi vesicle transport;membrane organization;organelle organization;protein transport;transport;vesicle organization;vesicle-mediated transport	cell part;cytosol;Golgi apparatus;intracellular membrane-bounded organelle;intracellular organelle;macromolecular complex;nucleoplasm;organelle;protein complex		Coatomer_E	ACEVEDO_LIVER_TUMOR_VS_NORMAL_ADJACENT_TISSUE_UP;BENPORATH_NANOG_TARGETS;CAMP_UP.V1_UP;CELLULAR_LOCALIZATION;CHAUHAN_RESPONSE_TO_METHOXYESTRADIOL_DN;chr19p13;COATED_MEMBRANE;COATED_VESICLE;COATED_VESICLE_MEMBRANE;CYTOPLASM;CYTOPLASMIC_MEMBRANE_BOUND_VESICLE;CYTOPLASMIC_PART;CYTOPLASMIC_VESICLE;CYTOPLASMIC_VESICLE_MEMBRANE;CYTOPLASMIC_VESICLE_PART;ENDOMEMBRANE_SYSTEM;ENK_UV_RESPONSE_KERATINOCYTE_U…	Alternativesplicing;Completeproteome;Cytoplasm;Cytoplasmicvesicle;Directproteinsequencing;ER-Golgitransport;Golgiapparatus;Membrane;Phosphoprotein;Polymorphism;Proteintransport;Referenceproteome;Transport;Ublconjugation		20	20	20	81.8	81.8	81.8	34.482	0	298.17	7597000000	4152200000	3444900000	O14579;O14579-3;O14579-2	O14579;O14579-3;O14579-2	Coatomer subunit epsilon	COPE	318
-0.193924	-0.559918	0.326587	0.273799	-0.249077	-0.0797337	-0.468281	-0.0553454	0.369651	-0.239066	-0.0159874	0.00198992	-0.288324	-0.061788	-0.0107857	-0.323758	-0.0646201	0.214849	0.896272	-0.0797337	-0.061788	0.0179457	0.459685	anterograde axon cargo transport;anterograde synaptic vesicle transport;antigen processing and presentation;antigen processing and presentation of exogenous antigen;antigen processing and presentation of lipid antigen via MHC class Ib;antigen processing and presentation via MHC class Ib;antigen processing and presentation, exogenous lipid antigen via MHC class Ib;axon cargo transport;biological r…	transporter activity	axon part;cell part;cell projection part;cytoplasmic part;endosomal part;endosome membrane;Golgi apparatus;Golgi apparatus part;Golgi membrane;intracellular membrane-bounded organelle;intracellular organelle;intracellular organelle part;intracellular part;lysosomal membrane;macromolecular complex;membrane;membrane coat;membrane part;membrane-bounded organelle;nuclear part;nucleoplasm;organelle;or…	biological regulation;biosynthetic process;cellular component movement;cellular component organization;cellular localization;cellular membrane organization;cellular process;cytoskeleton-dependent intracellular transport;endosome transport;establishment of localization;immune system process;localization;membrane organization;metabolic process;organelle organization;pigment granule organization;pig…	cell part;Golgi apparatus;intracellular membrane-bounded organelle;intracellular organelle;macromolecular complex;membrane;nucleoplasm;organelle;protein complex	Lysosome	Adaptin_N;BLVR	ACATTCC,MIR-1,MIR-206;BENPORATH_CYCLING_GENES;BIOSYNTHETIC_PROCESS;CACGTG_V$MYC_Q2;CAGCTG_V$AP4_Q5;CELLULAR_BIOSYNTHETIC_PROCESS;CELLULAR_LOCALIZATION;CGCTGCT,MIR-503;CHIARETTI_ACUTE_LYMPHOBLASTIC_LEUKEMIA_ZAP70;chr19p13;CYTOPLASM;CYTOPLASMIC_PART;ESTABLISHMENT_OF_CELLULAR_LOCALIZATION;ESTABLISHMENT_OF_LOCALIZATION;ESTABLISHMENT_OF_PROTEIN_LOCALIZATION;FLECHNER_BIOPSY_KIDNEY_TRANSPLANT_OK_VS_DONO…	3D-structure;Acetylation;Alternativesplicing;Coiledcoil;Completeproteome;Cytoplasm;Golgiapparatus;Membrane;Phosphoprotein;Polymorphism;Proteintransport;Referenceproteome;Repeat;Transport	AP3 adapter complex;AP3-BLOC1 complex;AP3D1-AP3S1 complex;AP3D1-AP3S2 complex	41	41	41	45.2	45.2	45.2	136.65	0	323.31	5277800000	3141500000	2136300000	O14617-5;O14617;O14617-4;O14617-2;O14617-3	O14617-5;O14617;O14617-4;O14617-2;O14617-3	AP-3 complex subunit delta-1	AP3D1	321
0.243655	1.10658	0.416771	0.630089	0.548351	1.24021	2.12063	1.4517	0.0999628	2.20274	0.917592	0.286534	1.81189	0.794792	1.11595	0.439931	1.76519	-0.12642	0.664424	0.630089	0.917592	0.287503	0.115151	biological regulation;cation transport;cellular metabolic process;cellular process;cellular response to chemical stimulus;cellular response to oxidative stress;cellular response to oxygen radical;cellular response to reactive oxygen species;cellular response to stimulus;cellular response to stress;cellular response to superoxide;copper ion transmembrane transport;copper ion transport;establishmen…	antioxidant activity;binding;catalytic activity;cation binding;cation transmembrane transporter activity;copper ion binding;copper ion transmembrane transporter activity;disulfide oxidoreductase activity;inorganic cation transmembrane transporter activity;ion binding;ion transmembrane transporter activity;metal ion binding;metal ion transmembrane transporter activity;oxidoreductase activity;oxido…	cell part;cytoplasm;cytoplasmic part;cytosol;intracellular membrane-bounded organelle;intracellular organelle;intracellular part;membrane-bounded organelle;nucleus;organelle	biological regulation;cellular metabolic process;cellular process;establishment of localization;ion transport;metabolic process;response to chemical stimulus;response to oxidative stress;response to stimulus;response to stress;transmembrane transport;transport	cell part;cytoplasm;cytosol;intracellular membrane-bounded organelle;intracellular organelle;nucleus;organelle	Amyotrophic lateral sclerosis (ALS)	HMA;Sod_Cu	ABE_INNER_EAR;BAKKER_FOXO3_TARGETS_DN;BROWNE_HCMV_INFECTION_4HR_DN;BYSTRYKH_HEMATOPOIESIS_STEM_CELL_QTL_TRANS;CATION_BINDING;CATION_TRANSMEMBRANE_TRANSPORTER_ACTIVITY;CATION_TRANSPORT;CELL_FRACTION;CELLULAR_LOCALIZATION;chr11q13;COPPER_ION_BINDING;CYTOPLASM;DAIRKEE_TERT_TARGETS_UP;DI___TRI_VALENT_INORGANIC_CATION_TRANSMEMBRANE_TRANSPORTER_ACTIVITY;ESTABLISHMENT_OF_CELLULAR_LOCALIZATION;ESTABLISHM…	3D-structure;Chaperone;Completeproteome;Copper;Cytoplasm;Disulfidebond;Isopeptidebond;Metal-binding;Phosphoprotein;Polymorphism;Referenceproteome;Ublconjugation;Zinc		12	12	12	55.8	55.8	55.8	29.04	0	64.223	2485800000	1937300000	548460000	O14618	O14618	Copper chaperone for superoxide dismutase	CCS	322
0.492025	0.123083	-0.722987	-0.738326	0.684535	-0.0351895	0.494069	-0.245407	0.0694839	-0.240604	0.0674503	-0.260609	0.19282	-0.52589	-0.0519878	-0.098272	0.0914465	0.351471	0.736911	0.0694839	-0.0519878	-0.121472	0.317572	biological regulation;biosynthetic process;cellular biosynthetic process;cellular component organization;cellular component organization at cellular level;cellular component organization or biogenesis;cellular component organization or biogenesis at cellular level;cellular macromolecule biosynthetic process;cellular macromolecule metabolic process;cellular metabolic process;cellular nitrogen comp…	adenyl nucleotide binding;adenyl ribonucleotide binding;ATP binding;ATPase activity;ATPase activity, coupled;ATP-dependent DNA helicase activity;ATP-dependent helicase activity;binding;catalytic activity;DNA binding;DNA helicase activity;DNA-dependent ATPase activity;helicase activity;histone binding;hydrolase activity;hydrolase activity, acting on acid anhydrides;hydrolase activity, acting on ac…	cell part;cytoplasm;intracellular membrane-bounded organelle;intracellular organelle;intracellular part;membrane-bounded organelle;nucleus;organelle	biological regulation;biosynthetic process;cellular component organization;cellular metabolic process;cellular nitrogen compound metabolic process;cellular process;chromatin modification;chromatin organization;chromosome organization;DNA geometric change;DNA metabolic process;interspecies interaction between organisms;macromolecule metabolic process;metabolic process;multi-organism process;nitrog…	cell part;cytoplasm;intracellular membrane-bounded organelle;intracellular organelle;nucleus;organelle		Chromo;DUF4208;Helicase_C;SNF2_N	ACEVEDO_NORMAL_TISSUE_ADJACENT_TO_LIVER_TUMOR_UP;ATP_DEPENDENT_DNA_HELICASE_ACTIVITY;ATP_DEPENDENT_HELICASE_ACTIVITY;ATPASE_ACTIVITY;ATPASE_ACTIVITY_COUPLED;BASSO_CD40_SIGNALING_UP;BERENJENO_TRANSFORMED_BY_RHOA_FOREVER_DN;BERENJENO_TRANSFORMED_BY_RHOA_UP;BIOPOLYMER_METABOLIC_PROCESS;BLALOCK_ALZHEIMERS_DISEASE_UP;BOCHKIS_FOXA2_TARGETS;BROWNE_HCMV_INFECTION_16HR_UP;BYSTRYKH_HEMATOPOIESIS_STEM_CELL_…	3D-structure;Alternativesplicing;ATP-binding;Chromatinregulator;Completeproteome;Cytoplasm;DNA-binding;Helicase;Hydrolase;Nucleotide-binding;Nucleus;Phosphoprotein;Polymorphism;Referenceproteome;Repeat;Transcription;Transcriptionregulation		36	36	2	26.7	26.7	1.7	196.69	0	138.14	1479500000	900740000	578740000	O14646	O14646	Chromodomain-helicase-DNA-binding protein 1	CHD1	325
0.881694	1.60288	NaN	NaN	0.887544	0.69489	1.12542	0.328551	1.14747	0.986093	0.383469	0.226408	-0.0716741	NaN	0.3025	0.554971	0.508979	0.970547	0.0344555	0.887544	0.446224	-0.44132	0.0359997	anatomical structure development;biological regulation;biosynthetic process;cell differentiation;cellular biosynthetic process;cellular component organization;cellular component organization at cellular level;cellular component organization or biogenesis;cellular component organization or biogenesis at cellular level;cellular developmental process;cellular macromolecule biosynthetic process;cellu…	adenyl nucleotide binding;adenyl ribonucleotide binding;ATP binding;ATPase activity;ATPase activity, coupled;ATP-dependent DNA helicase activity;ATP-dependent helicase activity;binding;catalytic activity;core promoter binding;core promoter sequence-specific DNA binding;DNA binding;DNA helicase activity;DNA-dependent ATPase activity;helicase activity;histone binding;hydrolase activity;hydrolase ac…	cell part;extracellular membrane-bounded organelle;extracellular organelle;extracellular region part;extracellular vesicular exosome;intracellular membrane-bounded organelle;intracellular non-membrane-bounded organelle;intracellular organelle;intracellular organelle part;intracellular part;membrane-bounded organelle;membrane-bounded vesicle;non-membrane-bounded organelle;nuclear part;nucleolus;nu…	anatomical structure development;biological regulation;biosynthetic process;cell differentiation;cellular component organization;cellular metabolic process;cellular nitrogen compound metabolic process;cellular process;chromatin modification;chromatin organization;chromosome organization;developmental process;DNA geometric change;DNA metabolic process;macromolecule metabolic process;metabolic proc…	cell part;extracellular organelle;intracellular membrane-bounded organelle;intracellular non-membrane-bounded organelle;intracellular organelle;nucleolus;nucleoplasm;nucleus;organelle;vesicle		Chromo;DUF4208;Helicase_C;SNF2_N	AAANWWTGC_UNKNOWN;AACTTT_UNKNOWN;AMUNDSON_RESPONSE_TO_ARSENITE;ATP_DEPENDENT_DNA_HELICASE_ACTIVITY;ATP_DEPENDENT_HELICASE_ACTIVITY;ATPASE_ACTIVITY;ATPASE_ACTIVITY_COUPLED;BENPORATH_NANOG_TARGETS;BIOPOLYMER_METABOLIC_PROCESS;BLALOCK_ALZHEIMERS_DISEASE_INCIPIENT_UP;BLALOCK_ALZHEIMERS_DISEASE_UP;BRCA1_DN.V1_DN;BRUINS_UVC_RESPONSE_EARLY_LATE;CAGGTG_V$E12_Q6;CCAWYNNGAAR_UNKNOWN;CHARAFE_BREAST_CANCER_L…	Alternativesplicing;ATP-binding;Chromatinregulator;Completeproteome;Diseasemutation;DNA-binding;Epilepsy;Helicase;Hydrolase;Myogenesis;Nucleotide-binding;Nucleus;Phosphoprotein;Polymorphism;Referenceproteome;Repeat;Transcription;Transcriptionregulation		28	19	19	20.7	16	16	211.34	0	109.95	352780000	239130000	113660000	O14647;O14647-2;O14647-3	O14647;O14647-2	Chromodomain-helicase-DNA-binding protein 2	CHD2	327
0.631265	0.785091	0.620744	-0.27018	NaN	NaN	0.00291433	NaN	0.550031	0.642515	0.342272	0.380248	0.221553	0.0395941	0.498874	0.837566	1.09391	0.499034	0.568059	0.585387	0.498874	-0.086513	0.370806	biological regulation;cellular component organization;cellular component organization at cellular level;cellular component organization or biogenesis;cellular component organization or biogenesis at cellular level;cellular macromolecule metabolic process;cellular membrane fusion;cellular membrane organization;cellular metabolic process;cellular process;cellular protein metabolic process;cellular …	binding;protein binding;SNAP receptor activity;SNARE binding;transporter activity	cell part;coated vesicle membrane;cytoplasmic part;cytoplasmic vesicle membrane;cytoplasmic vesicle part;endoplasmic reticulum membrane;endoplasmic reticulum part;endosomal part;endosome membrane;ER to Golgi transport vesicle membrane;Golgi apparatus;Golgi apparatus part;Golgi membrane;integral to membrane;intracellular membrane-bounded organelle;intracellular organelle;intracellular organelle pa…	biological regulation;cellular component organization;cellular membrane organization;cellular metabolic process;cellular process;endosome transport;establishment of localization;Golgi vesicle transport;macromolecule metabolic process;membrane fusion;membrane organization;metabolic process;organelle fusion;organelle organization;primary metabolic process;protein metabolic process;protein targeting…	cell part;Golgi apparatus;intracellular membrane-bounded organelle;intracellular organelle;macromolecular complex;membrane;organelle;protein complex	SNARE interactions in vesicular transport		ACTGTGA,MIR-27A,MIR-27B;AGUIRRE_PANCREATIC_CANCER_COPY_NUMBER_DN;BLALOCK_ALZHEIMERS_DISEASE_INCIPIENT_UP;BLALOCK_ALZHEIMERS_DISEASE_UP;BLUM_RESPONSE_TO_SALIRASIB_UP;BONOME_OVARIAN_CANCER_SURVIVAL_SUBOPTIMAL_DEBULKING;BROWNE_HCMV_INFECTION_18HR_UP;BROWNE_HCMV_INFECTION_20HR_UP;BROWNE_HCMV_INFECTION_6HR_DN;BYSTRYKH_HEMATOPOIESIS_STEM_CELL_QTL_TRANS;CAGTATT,MIR-200B,MIR-200C,MIR-429;CELLULAR_LOCALIZ…	3D-structure;Acetylation;Alternativesplicing;Coiledcoil;Completeproteome;Directproteinsequencing;Diseasemutation;Epilepsy;Golgiapparatus;Membrane;Polymorphism;Proteintransport;Referenceproteome;Transmembrane;Transmembranehelix;Transport		6	6	6	39.2	39.2	39.2	24.775	0	56.511	441910000	291910000	150010000	O14653;O14653-2;O14653-3	O14653;O14653-2;O14653-3	Golgi SNAP receptor complex member 2	GOSR2	328
0.620438	0.0213839	0.277776	0.4938	-0.103313	0.590519	0.201488	0.352512	1.02511	0.383577	0.181217	0.701605	0.189625	0.232558	-0.0663905	-0.579303	0.756041	0.756469	0.586337	0.352512	0.232558	-0.119954	0.319816	biological adhesion;biological regulation;catabolic process;cell adhesion;cell migration;cell motility;cell projection organization;cellular catabolic process;cellular component assembly;cellular component movement;cellular component organization;cellular component organization at cellular level;cellular component organization or biogenesis;cellular component organization or biogenesis at cellula…	adenyl nucleotide binding;adenyl ribonucleotide binding;ATP binding;ATPase activity;binding;catalytic activity;cytoskeletal protein binding;hydrolase activity;hydrolase activity, acting on acid anhydrides;hydrolase activity, acting on acid anhydrides, in phosphorus-containing anhydrides;kinesin binding;nucleoside-triphosphatase activity;nucleotide binding;protein binding;purine nucleotide binding…	cell junction;cell part;cell projection part;clathrin-coated vesicle;coated vesicle;cytoplasmic membrane-bounded vesicle;cytoplasmic part;cytoplasmic vesicle;cytoplasmic vesicle membrane;cytoplasmic vesicle part;cytoskeleton;endoplasmic reticulum;endoplasmic reticulum lumen;endoplasmic reticulum part;envelope;extracellular membrane-bounded organelle;extracellular organelle;extracellular region pa…	biological adhesion;biological regulation;catabolic process;cell adhesion;cell motility;cellular component assembly;cellular component movement;cellular component organization;cellular localization;cellular membrane organization;cellular metabolic process;cellular process;cytoskeleton organization;establishment of localization;localization;locomotion;macromolecular complex assembly;macromolecule …	cell part;cytoplasmic membrane-bounded vesicle;cytoskeleton;endoplasmic reticulum;extracellular organelle;intracellular membrane-bounded organelle;intracellular non-membrane-bounded organelle;intracellular organelle;membrane;nuclear envelope;organelle;site of polarized growth;vesicle		Torsin	ADENYL_NUCLEOTIDE_BINDING;ADENYL_RIBONUCLEOTIDE_BINDING;AMUNDSON_GENOTOXIC_SIGNATURE;ASTIER_INTEGRIN_SIGNALING;ATP_BINDING;BLALOCK_ALZHEIMERS_DISEASE_DN;CELLULAR_MACROMOLECULE_METABOLIC_PROCESS;CELLULAR_PROTEIN_METABOLIC_PROCESS;chr9q32;CTTTGT_V$LEF1_Q2;CYTOPLASM;CYTOPLASMIC_PART;DODD_NASOPHARYNGEAL_CARCINOMA_DN;ENDOPEPTIDASE_ACTIVITY;ENDOPLASMIC_RETICULUM;ENK_UV_RESPONSE_KERATINOCYTE_DN;GGAANCGG…	Alternativesplicing;ATP-binding;Celljunction;Cellprojection;Chaperone;Completeproteome;Cytoplasm;Cytoplasmicvesicle;Cytoskeleton;Diseasemutation;Dystonia;Endoplasmicreticulum;Glycoprotein;Hydrolase;Membrane;Nucleotide-binding;Nucleus;Polymorphism;Referenceproteome;Signal;Synapse	TorsinA-TorsinB complex	13	13	13	45.8	45.8	45.8	37.808	0	47.307	1896500000	1198200000	698240000	O14656;O14656-2	O14656	Torsin-1A	TOR1A	329
0.587585	-0.665044	1.30124	0.550697	-0.34772	0.497516	0.0822625	0.480356	0.456992	0.628553	0.230777	0.681728	0.397834	0.0830572	0.483864	-1.44818	0.270009	0.108315	0.566633	0.480356	0.270009	-0.210348	0.199734	cellular component assembly;cellular component organization;cellular component organization at cellular level;cellular component organization or biogenesis;cellular component organization or biogenesis at cellular level;cellular macromolecule metabolic process;cellular membrane organization;cellular metabolic process;cellular process;cellular protein metabolic process;chaperone mediated protein f…	adenyl nucleotide binding;adenyl ribonucleotide binding;ATP binding;ATPase activity;binding;catalytic activity;hydrolase activity;hydrolase activity, acting on acid anhydrides;hydrolase activity, acting on acid anhydrides, in phosphorus-containing anhydrides;nucleoside-triphosphatase activity;nucleotide binding;purine nucleotide binding;purine ribonucleoside triphosphate binding;purine ribonucleo…	cell part;cytoplasmic part;endoplasmic reticulum;endoplasmic reticulum lumen;endoplasmic reticulum part;envelope;extracellular membrane-bounded organelle;extracellular organelle;extracellular region part;extracellular vesicular exosome;intracellular membrane-bounded organelle;intracellular organelle;intracellular organelle lumen;intracellular organelle part;intracellular part;membrane;membrane-bo…	cellular component assembly;cellular component organization;cellular membrane organization;cellular metabolic process;cellular process;endoplasmic reticulum organization;macromolecular complex assembly;macromolecule metabolic process;membrane organization;metabolic process;organelle organization;primary metabolic process;protein complex assembly;protein folding;protein metabolic process;response …	cell part;endoplasmic reticulum;extracellular organelle;intracellular membrane-bounded organelle;intracellular organelle;membrane;nuclear envelope;organelle;vesicle		Torsin	ACEVEDO_LIVER_TUMOR_VS_NORMAL_ADJACENT_TISSUE_UP;BROWNE_HCMV_INFECTION_18HR_UP;BROWNE_HCMV_INFECTION_48HR_UP;chr9q34;CREIGHTON_ENDOCRINE_THERAPY_RESISTANCE_3;DOUGLAS_BMI1_TARGETS_DN;FULCHER_INFLAMMATORY_RESPONSE_LECTIN_VS_LPS_DN;GEORGES_TARGETS_OF_MIR192_AND_MIR215;GSE10325_MYELOID_VS_LUPUS_MYELOID_DN;GSE10856_CTRL_VS_TNFRSF6B_IN_MACROPHAGE_DN;GSE13484_12H_UNSTIM_VS_YF17D_VACCINE_STIM_PBMC_DN;GSE…	ATP-binding;Chaperone;Completeproteome;Endoplasmicreticulum;Glycoprotein;Hydrolase;Membrane;Nucleotide-binding;Nucleus;Polymorphism;Referenceproteome;Signal	TorsinA-TorsinB complex	9	9	9	35.4	35.4	35.4	37.978	0	25.475	681410000	431970000	249450000	O14657	O14657	Torsin-1B	TOR1B	330
0.499063	-0.0272877	0.600084	0.26736	0.712881	NaN	-0.0899191	NaN	0.00391143	NaN	-0.0847892	0.582233	0.221848	0.652232	0.229303	-0.264179	0.229881	0.490555	0.889457	0.26736	0.229592	-0.0377682	0.449135	cellular component organization;cellular component organization at cellular level;cellular component organization or biogenesis;cellular component organization or biogenesis at cellular level;cellular membrane fusion;cellular membrane organization;cellular process;endosome transport;establishment of localization;establishment of localization in cell;establishment of protein localization;Golgi org…	binding;protein binding;SNAP receptor activity;SNARE binding;syntaxin binding	adherens junction;anchoring junction;cell junction;cell part;cell-substrate adherens junction;cell-substrate junction;cytoplasm;cytoplasmic part;cytosol;endomembrane system;focal adhesion;Golgi apparatus;Golgi apparatus part;Golgi cisterna;Golgi membrane;integral to membrane;intracellular membrane-bounded organelle;intracellular non-membrane-bounded organelle;intracellular organelle;intracellular…	cellular component organization;cellular membrane organization;cellular process;endosome transport;establishment of localization;Golgi organization;Golgi vesicle transport;membrane docking;membrane fusion;membrane organization;organelle fusion;organelle organization;protein transport;transport;vesicle organization;vesicle-mediated transport	cell part;cytoplasm;cytosol;endomembrane system;Golgi apparatus;intracellular membrane-bounded organelle;intracellular non-membrane-bounded organelle;intracellular organelle;macromolecular complex;membrane;nucleolus;organelle;protein complex	SNARE interactions in vesicular transport	SNARE;Syntaxin	AAAYWAACM_V$HFH4_01;AAGCAAT,MIR-137;ACTGTGA,MIR-27A,MIR-27B;AZARE_NEOPLASTIC_TRANSFORMATION_BY_STAT3_DN;BENPORATH_MYC_MAX_TARGETS;CATTTCA,MIR-203;CELL_FRACTION;CELLULAR_LOCALIZATION;chr20q13;CONCANNON_APOPTOSIS_BY_EPOXOMICIN_UP;CSR_EARLY_UP.V1_DN;CTGCAGY_UNKNOWN;CTGTTAC,MIR-194;CYTOPLASM;CYTOPLASMIC_PART;DACOSTA_UV_RESPONSE_VIA_ERCC3_TTD_UP;DACOSTA_UV_RESPONSE_VIA_ERCC3_UP;DANG_BOUND_BY_MYC;DARWI…	Alternativesplicing;Coiledcoil;Completeproteome;Cytoplasm;Golgiapparatus;Membrane;Proteintransport;Referenceproteome;Transmembrane;Transmembranehelix;Transport	SNARE complex (VAMP3, VAMP4, STX16);SNARE complex (VAMP4, STX6, STX16, VTI1a, VTI1b)	6	6	6	27.9	27.9	27.9	35.299	0	32.706	240730000	157660000	83078000	O14662-4;O14662-2;O14662-5;O14662;O14662-6;O14662-3	O14662-4;O14662-2;O14662-5;O14662;O14662-6;O14662-3	Syntaxin-16	STX16	331
0.337038	-0.181048	0.73242	0.512393	0.10863	0.0596502	-0.50581	0.075635	0.740582	-0.980964	-0.112855	0.321263	-0.0784292	-0.0985518	0.152215	-0.472018	0.300961	0.644714	0.263867	0.10863	-0.0784292	-0.187059	0.227797	axon guidance;biological regulation;cell activation;cell communication;cell surface receptor linked signaling pathway;cell-cell signaling;cellular component disassembly;cellular component disassembly at cellular level;cellular component organization;cellular component organization at cellular level;cellular component organization or biogenesis;cellular component organization or biogenesis at cell…	binding;catalytic activity;cation binding;endopeptidase activity;enzyme binding;hydrolase activity;identical protein binding;integrin binding;ion binding;kinase binding;metal ion binding;metalloendopeptidase activity;metallopeptidase activity;peptidase activity;peptidase activity, acting on L-amino acid peptides;protein binding;protein complex binding;protein dimerization activity;protein homodim…	adherens junction;anchoring junction;cell junction;cell part;cell surface;cell-substrate adherens junction;cell-substrate junction;cytoplasm;cytoplasmic membrane-bounded vesicle;cytoplasmic part;cytoplasmic vesicle;cytoskeletal part;endoplasmic reticulum part;extracellular membrane-bounded organelle;extracellular organelle;extracellular region part;extracellular vesicular exosome;focal adhesion;G…	biological regulation;cell activation;cell communication;cell-cell signaling;cellular component disassembly;cellular component organization;cellular metabolic process;cellular process;developmental process;embryo development;extracellular matrix organization;extracellular structure organization;immune system process;locomotion;macromolecule metabolic process;macromolecule modification;metabolic p…	cell part;cell surface;cytoplasm;cytoplasmic membrane-bounded vesicle;extracellular organelle;Golgi apparatus;intracellular membrane-bounded organelle;intracellular organelle;membrane;nucleus;organelle;plasma membrane;vesicle	Alzheimer's disease;Epithelial cell signaling in Helicobacter pylori infection	Disintegrin;Pep_M12B_propep	ADDYA_ERYTHROID_DIFFERENTIATION_BY_HEMIN;AGTCTTA,MIR-499;AKT_UP.V1_UP;AKT_UP_MTOR_DN.V1_UP;ATATGCA,MIR-448;ATGTACA,MIR-493;ATGTTTC,MIR-494;BIOPOLYMER_METABOLIC_PROCESS;BIOPOLYMER_MODIFICATION;BOQUEST_STEM_CELL_CULTURED_VS_FRESH_UP;BUYTAERT_PHOTODYNAMIC_THERAPY_STRESS_DN;BYSTROEM_CORRELATED_WITH_IL5_DN;BYSTRYKH_HEMATOPOIESIS_STEM_CELL_QTL_TRANS;CACGTG_V$MYC_Q2;CAGCTTT,MIR-320;CAGGTG_V$E12_Q6;CELL_…	3D-structure;Alternativesplicing;Alzheimerdisease;Amyloidosis;Cellmembrane;Cleavageonpairofbasicresidues;Completeproteome;Directproteinsequencing;Diseasemutation;Disulfidebond;Glycoprotein;Hydrolase;Membrane;Metal-binding;Metalloprotease;Neurodegeneration;Notchsignalingpathway;Phosphoprotein;Polymorphism;Protease;Referenceproteome;SH3-binding;Signal;Transmembrane;Transmembranehelix;Zinc;Zymogen		26	26	26	52.4	52.4	52.4	84.141	0	202.92	3388700000	2196900000	1191900000	O14672;O14672-2	O14672;O14672-2	Disintegrin and metalloproteinase domain-containing protein 10	ADAM10	332
-0.093641	NaN	-0.922463	-0.930249	-0.701224	-1.08622	NaN	NaN	NaN	NaN	-1.21347	-0.167514	-0.888597	NaN	-1.89626	0.202476	NaN	-0.0889024	0.852208	-0.922463	-0.528056	0.394408	0.0510059	apoptosis;autophagy;biological regulation;catabolic process;cell death;cellular catabolic process;cellular metabolic process;cellular process;cellular response to stimulus;cellular response to stress;death;DNA damage response, signal transduction resulting in induction of apoptosis;induction of apoptosis;induction of apoptosis by intracellular signals;induction of programmed cell death;intracellu…		cell part;cytoplasm;cytoplasmic part;endoplasmic reticulum;endoplasmic reticulum membrane;endoplasmic reticulum part;Golgi apparatus;integral to membrane;intracellular membrane-bounded organelle;intracellular organelle;intracellular organelle part;intracellular part;intrinsic to membrane;membrane;membrane part;membrane-bounded organelle;nuclear membrane;nuclear part;organelle;organelle membrane;o…	autophagy;biological regulation;catabolic process;cell death;cellular metabolic process;cellular process;death;metabolic process;multicellular organismal process;neurological system process;response to chemical stimulus;response to DNA damage stimulus;response to drug;response to stimulus;response to stress;signal transduction	cell part;cytoplasm;endoplasmic reticulum;Golgi apparatus;intracellular membrane-bounded organelle;intracellular organelle;membrane;organelle	p53 signaling pathway		AMBROSINI_FLAVOPIRIDOL_TREATMENT_TP53;APOPTOSIS_GO;ATAGGAA,MIR-202;BERENJENO_TRANSFORMED_BY_RHOA_UP;BRACHAT_RESPONSE_TO_CAMPTOTHECIN_UP;BRACHAT_RESPONSE_TO_CISPLATIN;BRACHAT_RESPONSE_TO_METHOTREXATE_UP;CACTGCC,MIR-34A,MIR-34C,MIR-449;CCTGTGA,MIR-513;CELL_DEVELOPMENT;chr11q23;DIAZ_CHRONIC_MEYLOGENOUS_LEUKEMIA_UP;FUJII_YBX1_TARGETS_DN;GAGCTGG,MIR-337;GOLDRATH_NAIVE_VS_MEMORY_CD8_TCELL_DN;GRAESSMANN…	Acetylation;Alternativesplicing;Apoptosis;Autophagy;Completeproteome;Cytoplasm;Diseasemutation;Endoplasmicreticulum;Membrane;Nucleus;Phosphoprotein;Polymorphism;Referenceproteome;Transmembrane;Transmembranehelix		5	5	5	14.1	14.1	14.1	38.964	0	132	171050000	84184000	86866000	O14681;O14681-3	O14681;O14681-3	Etoposide-induced protein 2.4 homolog	EI24	333
-0.140521	1.12891	1.66091	1.49688	-0.472491	0.532575	-0.356066	0.587339	NaN	0.213682	1.492	1.13993	0.360825	1.52182	1.6304	0.620333	0.88898	0.0334321	0.380175	0.559957	0.88898	0.329024	0.085537	activation of caspase activity;activation of caspase activity by cytochrome c;anatomical structure development;anatomical structure formation involved in morphogenesis;apoptosis;biological regulation;cell death;cellular process;cellular response to biotic stimulus;cellular response to endogenous stimulus;cellular response to stimulus;death;developmental process;forebrain development;nervous syste…	adenyl nucleotide binding;adenyl ribonucleotide binding;ADP binding;apoptotic protease activator activity;ATP binding;binding;caspase activator activity;caspase regulator activity;enzyme activator activity;enzyme regulator activity;nucleotide binding;peptidase activator activity;peptidase regulator activity;purine nucleotide binding;purine ribonucleoside triphosphate binding;purine ribonucleotide…	apoptosome;cell part;cytoplasmic part;cytosol;cytosolic part;extracellular membrane-bounded organelle;extracellular organelle;extracellular region part;extracellular vesicular exosome;intracellular membrane-bounded organelle;intracellular organelle;intracellular part;macromolecular complex;membrane-bounded organelle;membrane-bounded vesicle;nucleus;organelle;protein complex;vesicle	anatomical structure development;anatomical structure formation involved in morphogenesis;biological regulation;cell death;cellular process;death;developmental process;response to biotic stimulus;response to endogenous stimulus;response to stimulus	cell part;cytosol;extracellular organelle;intracellular membrane-bounded organelle;intracellular organelle;macromolecular complex;nucleus;organelle;protein complex;vesicle	Alzheimer's disease;Amyotrophic lateral sclerosis (ALS);Apoptosis;Huntington's disease;ko05152;p53 signaling pathway;Parkinson's disease;Small cell lung cancer	CARD;NB-ARC;WD40	ACEVEDO_LIVER_CANCER_UP;ACTGTGA,MIR-27A,MIR-27B;ANATOMICAL_STRUCTURE_DEVELOPMENT;APOPTOSIS_GO;APOPTOTIC_PROGRAM;ATF2_S_UP.V1_UP;ATF2_UP.V1_UP;ATTACAT,MIR-380-3P;BIOCARTA_CASPASE_PATHWAY;BIOCARTA_CHEMICAL_PATHWAY;BIOCARTA_D4GDI_PATHWAY;BIOCARTA_DEATH_PATHWAY;BIOCARTA_HIVNEF_PATHWAY;BIOCARTA_HSP27_PATHWAY;BIOCARTA_MITOCHONDRIA_PATHWAY;BIOCARTA_P53_PATHWAY;BIOCARTA_TFF_PATHWAY;BRUINS_UVC_RESPONSE_VI…	3D-structure;Alternativesplicing;Apoptosis;ATP-binding;Calcium;Completeproteome;Cytoplasm;Directproteinsequencing;Nucleotide-binding;Referenceproteome;Repeat;WDrepeat	Apoptosome;Apoptosome-procaspase 9 complex	36	36	36	40.7	40.7	40.7	137.07	0	175.02	2249600000	1640600000	608970000	O14727-4;O14727;O14727-3;O14727-2;O14727-5;O14727-6	O14727-4;O14727;O14727-3;O14727-2;O14727-5	Apoptotic protease-activating factor 1	APAF1	336
-0.493741	2.29217	0.839611	1.50026	-0.00363417	0.864867	0.147146	1.54387	NaN	NaN	1.91866	1.56103	0.325136	0.999368	1.6833	1.37129	0.791999	NaN	0.326169	0.852239	1.37129	0.519047	0.016055	alcohol biosynthetic process;alcohol metabolic process;biological regulation;biosynthetic process;carbohydrate biosynthetic process;carbohydrate metabolic process;catabolic process;cellular biosynthetic process;cellular carbohydrate biosynthetic process;cellular carbohydrate metabolic process;cellular lipid metabolic process;cellular metabolic process;cellular process;cellular response to stimulu…	binding;catalytic activity;cation binding;hydrolase activity;hydrolase activity, acting on ester bonds;identical protein binding;inositol monophosphate phosphatase activity;inositol or phosphatidylinositol phosphatase activity;inositol phosphate phosphatase activity;ion binding;metal ion binding;phosphatase activity;phosphoric ester hydrolase activity;protein binding;protein dimerization activity…	cell part;cytoplasm;cytoplasmic part;cytosol;intracellular part	alcohol metabolic process;biological regulation;biosynthetic process;carbohydrate metabolic process;catabolic process;cellular lipid metabolic process;cellular metabolic process;cellular process;lipid metabolic process;metabolic process;phosphorus metabolic process;primary metabolic process;response to stimulus;signal transduction;small molecule metabolic process	cell part;cytoplasm;cytosol	Inositol phosphate metabolism;Phosphatidylinositol signaling system;Streptomycin biosynthesis	Inositol_P	AACTTT_UNKNOWN;BAELDE_DIABETIC_NEPHROPATHY_UP;BENPORATH_MYC_TARGETS_WITH_EBOX;BRUINS_UVC_RESPONSE_LATE;BYSTRYKH_HEMATOPOIESIS_STEM_CELL_QTL_TRANS;CAHOY_ASTROCYTIC;CHIANG_LIVER_CANCER_SUBCLASS_UNANNOTATED_DN;CHICAS_RB1_TARGETS_GROWING;chr18p11;CORRE_MULTIPLE_MYELOMA_DN;CROMER_METASTASIS_DN;DANG_BOUND_BY_MYC;DANG_MYC_TARGETS_UP;DEBIASI_APOPTOSIS_BY_REOVIRUS_INFECTION_DN;DODD_NASOPHARYNGEAL_CARCINOM…	3D-structure;Alternativesplicing;Completeproteome;Hydrolase;Magnesium;Metal-binding;Polymorphism;Referenceproteome		4	4	4	20.3	20.3	20.3	28.511	0	26.367	276310000	212600000	63711000	O14732-2;O14732	O14732-2;O14732	Inositol monophosphatase 2	IMPA2	338
0.278964	-0.885184	0.303955	-0.14893	0.587928	-0.778455	0.0578933	-0.853269	0.155163	-0.447634	-0.592306	0.0382404	-0.863848	-0.250266	-0.771758	-1.08992	-0.757929	0.367727	0.177254	0.0578933	-0.592306	-0.650199	0.00385885	acyl-CoA metabolic process;bile acid biosynthetic process;bile acid metabolic process;biosynthetic process;carboxylic acid biosynthetic process;carboxylic acid catabolic process;carboxylic acid metabolic process;catabolic process;cellular biosynthetic process;cellular catabolic process;cellular component organization;cellular component organization at cellular level;cellular component organizatio…	acyl-CoA hydrolase activity;acyl-CoA thioesterase activity;binding;carboxylic ester hydrolase activity;catalytic activity;choloyl-CoA hydrolase activity;CoA hydrolase activity;hydrolase activity;hydrolase activity, acting on ester bonds;palmitoyl-CoA hydrolase activity;protein binding;receptor binding;thiolester hydrolase activity	cell part;cytoplasmic part;intracellular membrane-bounded organelle;intracellular organelle;intracellular organelle lumen;intracellular organelle part;intracellular part;membrane-bounded organelle;membrane-enclosed lumen;microbody lumen;microbody part;mitochondrion;organelle;organelle lumen;organelle part;peroxisomal matrix;peroxisomal part	biosynthetic process;catabolic process;cellular component organization;cellular ketone metabolic process;cellular lipid metabolic process;cellular metabolic process;cellular process;cofactor metabolic process;lipid metabolic process;metabolic process;organelle fission;organelle organization;organic acid metabolic process;primary metabolic process;small molecule metabolic process;viral reproduction	cell part;intracellular membrane-bounded organelle;intracellular organelle;mitochondrion;organelle	Peroxisome		BENPORATH_NANOG_TARGETS;BENPORATH_SOX2_TARGETS;CHIARETTI_ACUTE_LYMPHOBLASTIC_LEUKEMIA_ZAP70;chr20q13;CYTOPLASM;CYTOPLASMIC_PART;DODD_NASOPHARYNGEAL_CARCINOMA_UP;ESC_V6.5_UP_LATE.V1_DN;FOSTER_KDM1A_TARGETS_DN;GATTGGY_V$NFY_Q6_01;GCM_CHUK;GCM_DENR;GGGTGGRR_V$PAX4_03;GSE12845_IGD_NEG_BLOOD_VS_PRE_GC_TONSIL_BCELL_UP;GSE13484_12H_VS_3H_YF17D_VACCINE_STIM_PBMC_UP;GSE13484_UNSTIM_VS_3H_YF17D_VACCINE_STI…	Completeproteome;Host-virusinteraction;Hydrolase;Peroxisome;Peroxisomebiogenesis;Referenceproteome;Serineesterase		6	6	6	27.9	27.9	27.9	35.914	0	44.237	790840000	484890000	305950000	O14734	O14734	Acyl-coenzyme A thioesterase 8	ACOT8	339
NaN	0.974549	0.593091	0.736384	0.755174	1.44422	1.41417	0.984736	1.85541	NaN	1.45255	1.41271	NaN	1.30094	0.964247	1.14844	NaN	1.5766	0.255262	0.979642	1.35683	0.377183	0.058792	acylglycerol metabolic process;biosynthetic process;CDP-diacylglycerol metabolic process;cellular biosynthetic process;cellular lipid metabolic process;cellular metabolic process;cellular process;diacylglycerol metabolic process;glycerol ether metabolic process;glycerolipid biosynthetic process;glycerolipid metabolic process;glycerophospholipid biosynthetic process;glycerophospholipid metabolic p…	alcohol binding;binding;carbohydrate binding;catalytic activity;cation binding;CDP-alcohol phosphatidyltransferase activity;CDP-diacylglycerol-inositol 3-phosphatidyltransferase activity;diacylglycerol binding;ion binding;lipid binding;manganese ion binding;metal ion binding;phosphotransferase activity, for other substituted phosphate groups;transferase activity;transferase activity, transferring…	cell part;cytoplasmic part;endoplasmic reticulum membrane;endoplasmic reticulum part;Golgi apparatus;Golgi apparatus part;Golgi membrane;integral to membrane;intracellular membrane-bounded organelle;intracellular organelle;intracellular organelle part;intracellular part;intrinsic to membrane;membrane;membrane part;membrane-bounded organelle;organelle;organelle membrane;organelle part;plasma membr…	biosynthetic process;cellular lipid metabolic process;cellular metabolic process;cellular process;glycerol ether metabolic process;lipid metabolic process;metabolic process;primary metabolic process;small molecule metabolic process	cell part;Golgi apparatus;intracellular membrane-bounded organelle;intracellular organelle;membrane;organelle;plasma membrane	Glycerophospholipid metabolism;Inositol phosphate metabolism;Phosphatidylinositol signaling system	CDP-OH_P_transf	BLALOCK_ALZHEIMERS_DISEASE_UP;CCTGCTG,MIR-214;chr16p12;CTTTAAR_UNKNOWN;FLECHNER_PBL_KIDNEY_TRANSPLANT_OK_VS_DONOR_UP;GCM_GSTA4;GCM_MYST2;GCM_SUFU;GCM_UBE2N;GGGAGGRR_V$MAZ_Q6;GGGCGGR_V$SP1_Q6;GOLDRATH_NAIVE_VS_EFF_CD8_TCELL_UP;GRAESSMANN_APOPTOSIS_BY_DOXORUBICIN_UP;GSE13306_TREG_RA_VS_TCONV_RA_UP;GSE13484_12H_UNSTIM_VS_YF17D_VACCINE_STIM_PBMC_UP;GSE13484_UNSTIM_VS_12H_YF17D_VACCINE_STIM_PBMC_UP;GS…	Alternativesplicing;Cellmembrane;Completeproteome;Endoplasmicreticulum;Golgiapparatus;Lipidbiosynthesis;Lipidmetabolism;Magnesium;Manganese;Membrane;Phospholipidbiosynthesis;Phospholipidmetabolism;Polymorphism;Referenceproteome;Transferase;Transmembrane;Transmembranehelix		3	3	3	19	19	19	18.624	0	8.6253	665550000	519650000	145900000	O14735-3;O14735;O14735-2	O14735-3;O14735	CDP-diacylglycerol--inositol 3-phosphatidyltransferase	CDIPT	340
-1.38924	-0.942043	-0.76481	-0.677156	-0.998039	-0.726832	-1.24119	-0.677188	-0.842874	-0.78706	-0.647454	-1.31634	-1.5687	-1.15657	-0.743942	-0.943198	-0.709089	-1.37567	0.446445	-0.842874	-0.943198	-0.100324	0.34941	biological regulation;cellular process;cellular response to chemical stimulus;cellular response to endogenous stimulus;cellular response to growth factor stimulus;cellular response to organic substance;cellular response to stimulus;cellular response to transforming growth factor beta stimulus;negative regulation of biological process;negative regulation of cell proliferation;negative regulation o…	acetyltransferase activator activity;beta-tubulin binding;binding;carbohydrate binding;cytoskeletal protein binding;DNA binding;enzyme activator activity;enzyme regulator activity;glycosaminoglycan binding;heparin binding;nucleic acid binding;pattern binding;polysaccharide binding;protein binding;tubulin binding	cell part;cytoplasm;extracellular membrane-bounded organelle;extracellular organelle;extracellular region part;extracellular vesicular exosome;intracellular membrane-bounded organelle;intracellular organelle;intracellular part;membrane-bounded organelle;membrane-bounded vesicle;nucleus;organelle;vesicle	biological regulation;cellular process;regulation of organelle organization;response to chemical stimulus;response to endogenous stimulus;response to stimulus	cell part;cytoplasm;extracellular organelle;intracellular membrane-bounded organelle;intracellular organelle;nucleus;organelle;vesicle		dsDNA_bind	AACTTT_UNKNOWN;ACEVEDO_LIVER_TUMOR_VS_NORMAL_ADJACENT_TISSUE_UP;APOPTOSIS_GO;BENPORATH_PROLIFERATION;BLALOCK_ALZHEIMERS_DISEASE_DN;BONOME_OVARIAN_CANCER_SURVIVAL_SUBOPTIMAL_DEBULKING;CELL_DEVELOPMENT;chr19q12;DARWICHE_PAPILLOMA_RISK_HIGH_UP;DARWICHE_PAPILLOMA_RISK_LOW_UP;DARWICHE_SKIN_TUMOR_PROMOTER_UP;DARWICHE_SQUAMOUS_CELL_CARCINOMA_UP;DODD_NASOPHARYNGEAL_CARCINOMA_DN;FARMER_BREAST_CANCER_APOCR…	3D-structure;Acetylation;Alternativesplicing;Apoptosis;Completeproteome;Directproteinsequencing;Phosphoprotein;Referenceproteome		12	12	12	76.8	76.8	76.8	14.285	0	74.395	3734300000	1699400000	2035000000	O14737;O14737-2	O14737;O14737-2	Programmed cell death protein 5	PDCD5	341
-1.11979	-0.928825	-0.880101	-0.997934	-0.797997	-0.706447	-0.75242	-0.883248	-1.25733	-0.378138	-0.909719	-1.28399	-0.795667	-0.636604	-0.93481	-0.742193	-0.475049	-1.10237	0.31371	-0.883248	-0.795667	0.0875815	0.35013	biological regulation;biosynthetic process;cell activation;cell proliferation;cellular biosynthetic process;cellular component assembly;cellular component assembly at cellular level;cellular component organization;cellular component organization at cellular level;cellular component organization or biogenesis;cellular component organization or biogenesis at cellular level;cellular macromolecular c…	arginine N-methyltransferase activity;binding;catalytic activity;chromatin binding;core promoter binding;core promoter sequence-specific DNA binding;DNA binding;histone methyltransferase activity;histone-arginine N-methyltransferase activity;methyltransferase activity;N-methyltransferase activity;nucleic acid binding;protein binding;protein binding transcription factor activity;protein dimerizati…	cell part;cytoplasm;cytoplasmic part;cytosol;intracellular membrane-bounded organelle;intracellular organelle;intracellular organelle part;intracellular part;macromolecular complex;membrane-bounded organelle;methylosome;methyltransferase complex;nuclear part;nucleoplasm;nucleus;organelle;organelle part;protein complex	biological regulation;biosynthetic process;cell activation;cell proliferation;cellular component assembly;cellular component organization;cellular macromolecular complex assembly;cellular metabolic process;cellular nitrogen compound metabolic process;cellular process;chromatin modification;chromatin organization;chromosome organization;histone modification;macromolecular complex assembly;macromol…	cell part;cytoplasm;cytosol;intracellular membrane-bounded organelle;intracellular organelle;macromolecular complex;nucleoplasm;nucleus;organelle;protein complex	Cell cycle - yeast;RNA transport	PRMT5	ACTAYRNNNCCCR_UNKNOWN;BENPORATH_MYC_MAX_TARGETS;BIOPOLYMER_METABOLIC_PROCESS;BIOPOLYMER_MODIFICATION;BOCHKIS_FOXA2_TARGETS;BOYAULT_LIVER_CANCER_SUBCLASS_G3_UP;BYSTRYKH_HEMATOPOIESIS_STEM_CELL_QTL_TRANS;CAIRO_HEPATOBLASTOMA_CLASSES_UP;CELL_CYCLE_GO_0007049;CELL_CYCLE_PHASE;CELL_CYCLE_PROCESS;CELL_PROLIFERATION_GO_0008283;CELLULAR_MACROMOLECULE_METABOLIC_PROCESS;CELLULAR_PROTEIN_METABOLIC_PROCESS;c…	3D-structure;Acetylation;Alternativesplicing;Biologicalrhythms;Chromatinregulator;Completeproteome;Cytoplasm;Directproteinsequencing;Methyltransferase;Nucleus;Referenceproteome;Repressor;S-adenosyl-L-methionine;Transcription;Transcriptionregulation;Transferase	20S methylosome and RG-containing Sm protein complex;20S methylosome-SmD complex;20S methyltransferase complex;20S methyltransferase core complex;Anti-Sm protein complex;AR coactivator complex;BRG1-associated complex;Brg1-associated complex I;Brg1-associated complex II;BRG1-SIN3A complex;BRG1-SIN3A-HDAC containing SWI/SNF remodeling complex I;Brm-associated complex;BRM-associated complex;BRM-SIN3…	24	24	24	47.1	47.1	47.1	72.683	0	195.54	4745200000	2371600000	2373500000	O14744;O14744-5;O14744-2;O14744-3;O14744-4	O14744;O14744-5;O14744-2;O14744-3;O14744-4	Protein arginine N-methyltransferase 5;Protein arginine N-methyltransferase 5, N-terminally processed	PRMT5	342
-0.915248	0.866227	0.460169	0.80683	0.237398	-0.00893054	0.239967	0.958497	-1.0351	0.151704	1.10609	0.243461	-0.163182	0.151784	0.726536	0.986278	0.990207	-0.859139	0.564002	0.239967	0.243461	0.00349419	0.483112	acid secretion;actin cytoskeleton organization;actin filament-based process;activation of adenylate cyclase activity;activation of adenylate cyclase activity by dopamine receptor signaling pathway;activation of adenylate cyclase activity by G-protein signaling pathway;activation of phospholipase C activity;activation of phospholipase C activity by dopamine receptor signaling pathway;activation of…	adrenergic receptor binding;beta-2 adrenergic receptor binding;beta-catenin binding;binding;channel regulator activity;chloride channel regulator activity;enzyme binding;G-protein-coupled receptor binding;growth factor receptor binding;PDZ domain binding;phosphatase binding;protein binding;protein domain specific binding;protein self-association;receptor binding	actin cytoskeleton;apical plasma membrane;brush border membrane;cell part;cell periphery;cell projection;cell projection membrane;cell projection part;centrosome;cytoplasm;cytoplasmic part;cytoskeletal part;cytoskeleton;endomembrane system;extracellular membrane-bounded organelle;extracellular organelle;extracellular region part;extracellular vesicular exosome;filopodium;intracellular membrane-bo…	amine transport;amino acid transport;biological regulation;cellular component assembly;cellular component organization;cellular homeostasis;cellular ion homeostasis;cellular localization;cellular process;cytoskeleton organization;establishment of localization;homeostatic process;ion transport;localization;macromolecular complex assembly;multicellular organismal process;organelle organization;orga…	cell part;cell projection;centrosome;cytoplasm;cytoskeleton;endomembrane system;extracellular organelle;filopodium;intracellular membrane-bounded organelle;intracellular non-membrane-bounded organelle;intracellular organelle;membrane;microtubule organizing center;microvillus;organelle;plasma membrane;vesicle		EBP50_C-term;PDZ	ACTIN_CYTOSKELETON;ACTWSNACTNY_UNKNOWN;BHAT_ESR1_TARGETS_NOT_VIA_AKT1_UP;BHAT_ESR1_TARGETS_VIA_AKT1_UP;BILD_E2F3_ONCOGENIC_SIGNATURE;BIOCARTA_CFTR_PATHWAY;BLUM_RESPONSE_TO_SALIRASIB_DN;BROWNE_HCMV_INFECTION_16HR_UP;CAGGTG_V$E12_Q6;CELLULAR_COMPONENT_ASSEMBLY;CHARAFE_BREAST_CANCER_LUMINAL_VS_BASAL_UP;CHARAFE_BREAST_CANCER_LUMINAL_VS_MESENCHYMAL_UP;chr17q24;COULOUARN_TEMPORAL_TGFB1_SIGNATURE_DN;CYT…	3D-structure;Acetylation;Alternativesplicing;Cellmembrane;Cellprojection;Completeproteome;Cytoplasm;Directproteinsequencing;Diseasemutation;Membrane;Phosphoprotein;Polymorphism;Referenceproteome;Repeat;Wntsignalingpathway	(C-CFTR)2-NHERF-ezrin complex;C-CFTR-NHERF(PDZ1 domain)-ezrin complex;C-CFTR-NHERF(PDZ2 domain)-ezrin complex;CFTR-NHERF-beta(2)AR signaling complex	20	20	20	68.4	68.4	68.4	38.868	0	323.31	7362800000	5028400000	2334400000	O14745;O14745-2	O14745;O14745-2	Na(+)/H(+) exchange regulatory cofactor NHE-RF1	SLC9A3R1	343
0.961381	1.05941	0.86488	1.06507	1.08262	1.48261	1.01491	0.527298	1.43242	0.493474	1.19438	1.43814	1.32489	1.02244	1.09007	0.256227	1.8159	1.3546	0.76994	1.05941	1.19438	0.134974	0.281606	anatomical structure development;anatomical structure homeostasis;biological regulation;bone resorption;catabolic process;cell differentiation;cellular catabolic process;cellular component organization;cellular component organization at cellular level;cellular component organization or biogenesis;cellular component organization or biogenesis at cellular level;cellular developmental process;cellul…	binding;catalytic activity;cation binding;endopeptidase activity;exopeptidase activity;hydrolase activity;ion binding;metal ion binding;peptidase activity;peptidase activity, acting on L-amino acid peptides;peptide binding;serine hydrolase activity;serine-type endopeptidase activity;serine-type peptidase activity;tripeptidyl-peptidase activity	cell part;cytoplasmic membrane-bounded vesicle;cytoplasmic part;cytoplasmic vesicle;extracellular membrane-bounded organelle;extracellular organelle;extracellular region part;extracellular vesicular exosome;intracellular membrane-bounded organelle;intracellular organelle;intracellular organelle lumen;intracellular organelle part;intracellular part;lysosomal lumen;lysosome;lytic vacuole;melanosome…	anatomical structure development;biological regulation;catabolic process;cell differentiation;cellular component organization;cellular metabolic process;cellular process;developmental process;homeostatic process;lipid metabolic process;macromolecule metabolic process;metabolic process;multicellular organismal process;neurological system process;organelle organization;peptide metabolic process;pri…	cell part;cytoplasmic membrane-bounded vesicle;extracellular organelle;intracellular membrane-bounded organelle;intracellular organelle;lysosome;mitochondrion;organelle;vacuole;vesicle	Lysosome	Peptidase_S8;Pro-kuma_activ	AMINOPEPTIDASE_ACTIVITY;AMUNDSON_RESPONSE_TO_ARSENITE;ANATOMICAL_STRUCTURE_DEVELOPMENT;BASSO_B_LYMPHOCYTE_NETWORK;BERENJENO_TRANSFORMED_BY_RHOA_DN;BONE_REMODELING;BRACHAT_RESPONSE_TO_CAMPTOTHECIN_UP;BYSTRYKH_HEMATOPOIESIS_STEM_CELL_QTL_TRANS;CATABOLIC_PROCESS;CELL_FRACTION;CELLULAR_CATABOLIC_PROCESS;CELLULAR_MACROMOLECULE_METABOLIC_PROCESS;CELLULAR_PROTEIN_METABOLIC_PROCESS;CHIBA_RESPONSE_TO_TSA;…	3D-structure;Alternativesplicing;Autocatalyticcleavage;Calcium;Completeproteome;Directproteinsequencing;Diseasemutation;Disulfidebond;Epilepsy;Glycoprotein;Hydrolase;Lysosome;Metal-binding;Neurodegeneration;Neuronalceroidlipofuscinosis;Polymorphism;Protease;Referenceproteome;Serineprotease;Signal;Spinocerebellarataxia;Zymogen		13	13	13	45.1	45.1	45.1	61.247	0	289.81	14501000000	11378000000	3123000000	O14773;O14773-2	O14773;O14773-2	Tripeptidyl-peptidase 1	TPP1	345
0.288213	-0.169767	-0.593819	-0.424355	0.303329	0.0873305	0.0739357	-0.17955	0.318261	0.0247945	-0.278205	-0.366475	-0.0129116	-0.163365	-0.27249	-0.188332	-0.0614217	0.208628	0.484621	0.0739357	-0.163365	-0.237301	0.169993	biological regulation;biosynthetic process;cellular biosynthetic process;cellular macromolecule biosynthetic process;cellular macromolecule metabolic process;cellular metabolic process;cellular nitrogen compound metabolic process;cellular process;macromolecule biosynthetic process;macromolecule metabolic process;metabolic process;negative regulation of biological process;negative regulation of bi…	binding;protein binding;protein binding transcription factor activity;repressing transcription factor binding;RNA polymerase II repressing transcription factor binding;RNA polymerase II transcription cofactor activity;RNA polymerase II transcription corepressor activity;RNA polymerase II transcription factor binding;RNA polymerase II transcription factor binding transcription factor activity;RNA …	actin cytoskeleton;cell part;cytoskeleton;intracellular membrane-bounded organelle;intracellular non-membrane-bounded organelle;intracellular organelle;intracellular organelle part;intracellular part;membrane-bounded organelle;non-membrane-bounded organelle;nuclear part;nucleolus;nucleus;organelle;organelle part	biological regulation;biosynthetic process;cellular metabolic process;cellular nitrogen compound metabolic process;cellular process;macromolecule metabolic process;metabolic process;nitrogen compound metabolic process;nucleobase-containing compound metabolic process;primary metabolic process;RNA metabolic process;transcription from RNA polymerase II promoter	cell part;cytoskeleton;intracellular membrane-bounded organelle;intracellular non-membrane-bounded organelle;intracellular organelle;nucleolus;nucleus;organelle	Spliceosome	FF;WW	BENPORATH_NANOG_TARGETS;BERENJENO_TRANSFORMED_BY_RHOA_UP;BIOPOLYMER_METABOLIC_PROCESS;BLALOCK_ALZHEIMERS_DISEASE_DN;CACGTG_V$MYC_Q2;CACTTTG,MIR-520G,MIR-520H;CAGTGTT,MIR-141,MIR-200A;CAIRO_HEPATOBLASTOMA_CLASSES_UP;CATRRAGC_UNKNOWN;chr5q31;CTTTGA_V$LEF1_Q2;DIAZ_CHRONIC_MEYLOGENOUS_LEUKEMIA_UP;ENK_UV_RESPONSE_KERATINOCYTE_DN;GATTGGY_V$NFY_Q6_01;GCM_DFFA;GCM_HBP1;GCM_MAX;GNF2_APEX1;GNF2_FBL;GNF2_ML…	3D-structure;Activator;Alternativesplicing;Coiledcoil;Completeproteome;Directproteinsequencing;Nucleus;Referenceproteome;Repeat;Repressor;Transcription;Transcriptionregulation	Spliceosome	44	44	40	37.5	37.5	35.1	121.69	0	201.67	10063000000	5408000000	4655200000	O14776-2;O14776	O14776-2;O14776	Transcription elongation regulator 1	TCERG1	346
-0.901664	-0.671349	-0.739389	-0.559368	-0.447909	-0.433447	0.23	-0.470011	-0.92469	-0.221513	-0.571154	-0.978234	-0.303162	-0.468362	-0.584796	-0.262148	0.286224	-1.01326	0.62019	-0.559368	-0.468362	0.0910064	0.344974	establishment of localization;establishment of localization in cell;establishment of protein localization;intracellular protein transport;intracellular transport;protein transport;transport	binding;nuclear localization sequence binding;peptide binding;signal sequence binding	cell part;cytoplasm;intracellular membrane-bounded organelle;intracellular organelle;intracellular part;membrane-bounded organelle;nucleus;organelle	establishment of localization;protein transport;transport	cell part;cytoplasm;intracellular membrane-bounded organelle;intracellular organelle;nucleus;organelle		HEAT;IBN_N	AACTTT_UNKNOWN;AACWWCAANK_UNKNOWN;ACATTCC,MIR-1,MIR-206;ACCATTT,MIR-522;ACTAYRNNNCCCR_UNKNOWN;BENPORATH_CYCLING_GENES;BONOME_OVARIAN_CANCER_SURVIVAL_SUBOPTIMAL_DEBULKING;CACGTG_V$MYC_Q2;chr19p13;CONCANNON_APOPTOSIS_BY_EPOXOMICIN_UP;CREIGHTON_ENDOCRINE_THERAPY_RESISTANCE_1;CRX_NRL_DN.V1_DN;CTCTGGA,MIR-520A,MIR-525;CYTOPLASM;EBAUER_TARGETS_OF_PAX3_FOXO1_FUSION_UP;GARY_CD5_TARGETS_DN;GATTGGY_V$NFY_Q…	Acetylation;Alternativesplicing;Completeproteome;Cytoplasm;Nucleus;Polymorphism;Proteintransport;Referenceproteome;Repeat;Transport	TNPO2-RAN-NXF1 complex	18	13	13	33.4	28.1	28.1	100.41	0	83.148	1574600000	723100000	851510000	O14787-2;O14787	O14787-2;O14787	Transportin-2	TNPO2	348
0.279726	0.257157	-0.350779	-0.762853	0.759748	0.200054	-0.0631206	-0.253799	-0.149909	0.412248	-0.338019	-0.44238	-3.5258	-0.0505125	-0.340403	0.281754	-0.217284	-0.139664	0.282364	-0.0631206	-0.217284	-0.154164	0.270968	biological regulation;biosynthetic process;cellular biosynthetic process;cellular macromolecule biosynthetic process;cellular macromolecule metabolic process;cellular metabolic process;cellular nitrogen compound metabolic process;cellular process;defense response;defense response to virus;gene expression;immune effector process;immune response;immune system process;innate immune response;macromol…	binding;catalytic activity;cation binding;chromatin binding;DNA binding;DNA-directed RNA polymerase activity;ion binding;metal ion binding;nucleic acid binding;nucleoside binding;nucleotidyltransferase activity;ribonucleoside binding;RNA polymerase activity;transferase activity;transferase activity, transferring phosphorus-containing groups;transition metal ion binding;zinc ion binding	cell part;cytoplasmic part;cytosol;DNA-directed RNA polymerase complex;DNA-directed RNA polymerase III complex;intracellular organelle part;intracellular part;macromolecular complex;membrane;nuclear DNA-directed RNA polymerase complex;nuclear part;nucleoplasm;nucleoplasm part;organelle part;protein complex;RNA polymerase complex	biological regulation;biosynthetic process;cellular metabolic process;cellular nitrogen compound metabolic process;cellular process;immune system process;macromolecule metabolic process;metabolic process;multi-organism process;nitrogen compound metabolic process;nucleobase-containing compound metabolic process;primary metabolic process;response to biotic stimulus;response to stimulus;response to …	cell part;cytosol;macromolecular complex;membrane;nucleoplasm;protein complex;RNA polymerase complex	Cytosolic DNA-sensing pathway;Purine metabolism;Pyrimidine metabolism;RNA polymerase	RNA_pol_Rpb1_1;RNA_pol_Rpb1_2;RNA_pol_Rpb1_3;RNA_pol_Rpb1_4;RNA_pol_Rpb1_5	ACEVEDO_METHYLATED_IN_LIVER_CANCER_DN;BENPORATH_MYC_MAX_TARGETS;CACGTG_V$MYC_Q2;chr10q22;DANG_BOUND_BY_MYC;GOLDRATH_EFF_VS_MEMORY_CD8_TCELL_DN;GRAESSMANN_APOPTOSIS_BY_DOXORUBICIN_DN;GRAESSMANN_RESPONSE_TO_MC_AND_DOXORUBICIN_DN;GSE15750_WT_VS_TRAF6KO_DAY6_EFF_CD8_TCELL_DN;GSE15930_STIM_VS_STIM_AND_IFNAB_24H_CD8_T_CELL_DN;GSE15930_STIM_VS_STIM_AND_IFNAB_72H_CD8_T_CELL_DN;GSE15930_STIM_VS_STIM_AND_I…	Acetylation;Antiviraldefense;Completeproteome;Diseasemutation;DNA-directedRNApolymerase;Immunity;Innateimmunity;Leukodystrophy;Magnesium;Metal-binding;Nucleotidyltransferase;Nucleus;Polymorphism;Referenceproteome;Transcription;Transferase;Zinc		15	14	14	17.8	17.1	17.1	155.64	0	44.144	348120000	199920000	148200000	O14802	O14802	DNA-directed RNA polymerase III subunit RPC1	POLR3A	349
-0.590701	-0.19719	0.12883	0.10824	-0.493525	-0.0553319	-0.228785	0	-0.797525	-0.237013	-0.428716	-0.137871	-0.389904	0.160024	-0.174305	0.013142	0.123454	-0.611637	0.727974	-0.19719	-0.174305	0.0228851	0.451705	activation of immune response;activation of innate immune response;anaphase-promoting complex-dependent proteasomal ubiquitin-dependent protein catabolic process;antigen processing and presentation;antigen processing and presentation of exogenous antigen;antigen processing and presentation of exogenous peptide antigen;antigen processing and presentation of exogenous peptide antigen via MHC class …	binding;catalytic activity;endopeptidase activity;hydrolase activity;identical protein binding;peptidase activity;peptidase activity, acting on L-amino acid peptides;protein binding;threonine-type endopeptidase activity;threonine-type peptidase activity	cell part;cytoplasm;cytoplasmic part;cytosol;extracellular membrane-bounded organelle;extracellular organelle;extracellular region part;extracellular vesicular exosome;intracellular membrane-bounded organelle;intracellular organelle;intracellular organelle part;intracellular part;macromolecular complex;membrane-bounded organelle;membrane-bounded vesicle;nuclear part;nucleoplasm;nucleus;organelle;…	biological regulation;catabolic process;cell cycle;cell death;cellular metabolic process;cellular nitrogen compound metabolic process;cellular process;death;immune system process;macromolecule metabolic process;macromolecule modification;metabolic process;mitotic cell cycle;nitrogen compound metabolic process;primary metabolic process;protein metabolic process;protein modification by small protei…	cell part;cytoplasm;cytosol;extracellular organelle;intracellular membrane-bounded organelle;intracellular organelle;macromolecular complex;nucleoplasm;nucleus;organelle;proteasome complex;protein complex;vesicle	Proteasome	Proteasome;Proteasome_A_N	AGUIRRE_PANCREATIC_CANCER_COPY_NUMBER_UP;APPIERTO_RESPONSE_TO_FENRETINIDE_UP;BERENJENO_TRANSFORMED_BY_RHOA_UP;BIOCARTA_ACTINY_PATHWAY;BIOCARTA_PROTEASOME_PATHWAY;BLALOCK_ALZHEIMERS_DISEASE_DN;CHANG_CORE_SERUM_RESPONSE_UP;chr20q13;DIAZ_CHRONIC_MEYLOGENOUS_LEUKEMIA_UP;DODD_NASOPHARYNGEAL_CARCINOMA_DN;GARCIA_TARGETS_OF_FLI1_AND_DAX1_DN;GARY_CD5_TARGETS_DN;GCAAAAA,MIR-129;GINESTIER_BREAST_CANCER_20Q1…	3D-structure;Acetylation;Alternativesplicing;Completeproteome;Cytoplasm;Directproteinsequencing;Glycoprotein;Host-virusinteraction;Hydrolase;Nucleus;Phosphoprotein;Protease;Proteasome;Referenceproteome;Threonineprotease	20S proteasome;26S proteasome;PA28-20S proteasome;PA28gamma-20S proteasome;PA700-20S-PA28 complex	16	16	16	56.9	56.9	56.9	27.887	0	215.25	23935000000	14650000000	9285300000	O14818;O14818-4;O14818-2;Q8TAA3-2;Q8TAA3-5;Q8TAA3	O14818;O14818-4;O14818-2	Proteasome subunit alpha type-7	PSMA7	350
-0.375226	-0.835194	-0.894527	-0.63346	-0.231727	-1.07102	-0.925931	-0.619202	-0.113511	-0.782255	-1.13466	-0.462068	-1.08332	-1.01745	-0.712943	-0.916018	-1.24722	-0.139664	0.235495	-0.63346	-0.916018	-0.282558	0.126805	cellular process;establishment of localization;establishment of localization in cell;establishment of protein localization;Golgi vesicle transport;intracellular transport;post-Golgi vesicle-mediated transport;protein transport;response to chemical stimulus;response to external stimulus;response to extracellular stimulus;response to nutrient;response to nutrient levels;response to retinoic acid;re…	binding;enzyme binding;protein binding;ubiquitin protein ligase binding	cell part;cytoplasmic part;extracellular membrane-bounded organelle;extracellular organelle;extracellular region part;extracellular vesicular exosome;Golgi apparatus part;Golgi membrane;integral to membrane;intracellular organelle part;intracellular part;intrinsic to membrane;membrane;membrane part;membrane-bounded organelle;membrane-bounded vesicle;organelle;organelle membrane;organelle part;ves…	cellular process;establishment of localization;Golgi vesicle transport;protein transport;response to chemical stimulus;response to external stimulus;response to extracellular stimulus;response to stimulus;transport;vesicle-mediated transport	cell part;extracellular organelle;membrane;organelle;vesicle		SCAMP	AACTGGA,MIR-145;ACEVEDO_LIVER_TUMOR_VS_NORMAL_ADJACENT_TISSUE_UP;ACTAYRNNNCCCR_UNKNOWN;ALCALA_APOPTOSIS;BENPORATH_MYC_MAX_TARGETS;BLALOCK_ALZHEIMERS_DISEASE_UP;BORCZUK_MALIGNANT_MESOTHELIOMA_UP;BOYAULT_LIVER_CANCER_SUBCLASS_G12_UP;CACGTG_V$MYC_Q2;CAGGTA_V$AREB6_01;CAGGTG_V$E12_Q6;CELLULAR_LOCALIZATION;CHIANG_LIVER_CANCER_SUBCLASS_UNANNOTATED_DN;chr1q21;CTTTGA_V$LEF1_Q2;CTTTGT_V$LEF1_Q2;DANG_BOUND…	Alternativesplicing;Completeproteome;Membrane;Phosphoprotein;Polymorphism;Proteintransport;Referenceproteome;Transmembrane;Transmembranehelix;Transport;Ublconjugation	SCAMP1-SCAMP2-SCAMP3 complex	10	10	10	41.5	41.5	41.5	38.287	0	173.68	3263600000	1866400000	1397200000	O14828;O14828-2	O14828;O14828-2	Secretory carrier-associated membrane protein 3	SCAMP3	351
-0.10021	-0.692464	0.0519422	-0.199682	-0.0306803	-0.269458	-0.791984	-1.47887	0.211084	-0.764254	-1.09309	0.369957	0.330385	-0.71391	-0.505471	-0.565597	-0.843066	0.0702033	0.856881	-0.199682	-0.565597	-0.365914	0.068529	amine catabolic process;amine metabolic process;branched chain family amino acid catabolic process;branched chain family amino acid metabolic process;carboxylic acid catabolic process;carboxylic acid metabolic process;catabolic process;cellular amine metabolic process;cellular amino acid catabolic process;cellular amino acid metabolic process;cellular catabolic process;cellular ketone metabolic p…	[3-methyl-2-oxobutanoate dehydrogenase (acetyl-transferring)] kinase activity;adenyl nucleotide binding;adenyl ribonucleotide binding;ATP binding;binding;catalytic activity;kinase activity;nucleotide binding;phosphotransferase activity, alcohol group as acceptor;protein kinase activity;protein serine/threonine kinase activity;purine nucleotide binding;purine ribonucleoside triphosphate binding;pu…	cell part;cytoplasmic part;dihydrolipoyl dehydrogenase complex;intracellular membrane-bounded organelle;intracellular organelle;intracellular organelle part;intracellular part;macromolecular complex;membrane-bounded organelle;mitochondrial alpha-ketoglutarate dehydrogenase complex;mitochondrial part;mitochondrial tricarboxylic acid cycle enzyme complex;mitochondrion;organelle;organelle part;prote…	amine metabolic process;catabolic process;cellular amino acid metabolic process;cellular ketone metabolic process;cellular metabolic process;cellular nitrogen compound metabolic process;cellular process;macromolecule metabolic process;macromolecule modification;metabolic process;nitrogen compound metabolic process;organic acid metabolic process;phosphorus metabolic process;primary metabolic proce…	cell part;intracellular membrane-bounded organelle;intracellular organelle;macromolecular complex;mitochondrion;organelle;protein complex;tricarboxylic acid cycle enzyme complex		BCDHK_Adom3;HATPase_c	AACWWCAANK_UNKNOWN;ACEVEDO_LIVER_CANCER_DN;ACTAYRNNNCCCR_UNKNOWN;ACTWSNACTNY_UNKNOWN;ADENYL_NUCLEOTIDE_BINDING;ADENYL_RIBONUCLEOTIDE_BINDING;AGGGCAG,MIR-18A;AMINE_CATABOLIC_PROCESS;AMINE_METABOLIC_PROCESS;AMINO_ACID_AND_DERIVATIVE_METABOLIC_PROCESS;AMINO_ACID_CATABOLIC_PROCESS;AMINO_ACID_METABOLIC_PROCESS;ATP_BINDING;BROWNE_HCMV_INFECTION_1HR_DN;BROWNE_HCMV_INFECTION_48HR_DN;CARBOXYLIC_ACID_METAB…	Acetylation;Alternativesplicing;ATP-binding;Completeproteome;Diseasemutation;Kinase;Mitochondrion;Nucleotide-binding;Phosphoprotein;Referenceproteome;Transferase;Transitpeptide		10	10	10	43.3	43.3	43.3	37.767	0	64.071	1613100000	1191200000	421930000	O14874-2;O14874-3;O14874	O14874-2;O14874-3;O14874	[3-methyl-2-oxobutanoate dehydrogenase [lipoamide]] kinase, mitochondrial	BCKDK	354
1.07283	0.824845	0.83915	0.359333	1.04858	1.26847	0.415418	0.417079	0.701811	0.170501	0.71488	1.35422	0.924301	0.617835	0.812155	-6.85199e-05	1.02423	1.06369	0.872059	0.824845	0.812155	-0.0126901	0.490431	biological regulation;cellular metabolic process;cellular process;cellular response to stimulus;lipid metabolic process;metabolic process;oxidation-reduction process;primary metabolic process;regulation of biological process;regulation of cellular process;response to stimulus;signal transduction;small molecule metabolic process;xenobiotic metabolic process	antioxidant activity;catalytic activity;glutathione peroxidase activity;glutathione transferase activity;oxidoreductase activity;oxidoreductase activity, acting on peroxide as acceptor;peroxidase activity;transferase activity;transferase activity, transferring alkyl or aryl (other than methyl) groups	cell part;cytoplasmic part;endoplasmic reticulum membrane;endoplasmic reticulum part;envelope;extracellular membrane-bounded organelle;extracellular organelle;extracellular region part;extracellular vesicular exosome;integral to membrane;intracellular membrane-bounded organelle;intracellular organelle;intracellular organelle part;intracellular part;intrinsic to membrane;membrane;membrane part;mem…	biological regulation;cellular metabolic process;cellular process;lipid metabolic process;metabolic process;primary metabolic process;response to stimulus;signal transduction;small molecule metabolic process;xenobiotic metabolic process	cell part;extracellular organelle;intracellular membrane-bounded organelle;intracellular organelle;membrane;nuclear envelope;organelle;vesicle	Drug metabolism - cytochrome P450;Glutathione metabolism;Metabolism of xenobiotics by cytochrome P450	MAPEG	ACEVEDO_LIVER_TUMOR_VS_NORMAL_ADJACENT_TISSUE_UP;ANTIOXIDANT_ACTIVITY;BERENJENO_TRANSFORMED_BY_RHOA_DN;BERENJENO_TRANSFORMED_BY_RHOA_REVERSIBLY_UP;BLALOCK_ALZHEIMERS_DISEASE_DN;BROWNE_HCMV_INFECTION_24HR_DN;BRUINS_UVC_RESPONSE_VIA_TP53_GROUP_A;BURTON_ADIPOGENESIS_5;CASORELLI_ACUTE_PROMYELOCYTIC_LEUKEMIA_UP;CELL_FRACTION;CHIARADONNA_NEOPLASTIC_TRANSFORMATION_CDC25_DN;chr1q23;CHYLA_CBFA2T3_TARGETS_…	Completeproteome;Endoplasmicreticulum;Lipoprotein;Membrane;Microsome;Palmitate;Polymorphism;Referenceproteome;Transferase;Transmembrane;Transmembranehelix		5	5	5	34.2	34.2	34.2	16.516	0	79.891	2521900000	1833200000	688680000	O14880	O14880	Microsomal glutathione S-transferase 3	MGST3	356
-0.456021	0.267155	0.472101	0.734213	-0.502632	-0.000521892	-0.00914241	0.164459	-0.464011	-0.0100089	0.58948	0.0719212	-0.629327	0.546006	0.422615	0.247046	0.284542	-0.319427	0.584703	-0.000521892	0.247046	0.247567	0.149901	activation of immune response;activation of innate immune response;antigen receptor-mediated signaling pathway;B cell homeostasis;biological regulation;cell surface receptor linked signaling pathway;cellular macromolecule metabolic process;cellular metabolic process;cellular process;cellular protein metabolic process;cellular response to chemical stimulus;cellular response to cytokine stimulus;ce…	adenyl nucleotide binding;adenyl ribonucleotide binding;ATP binding;binding;catalytic activity;enzyme binding;identical protein binding;IkappaB kinase activity;kinase activity;kinase binding;nucleotide binding;phosphotransferase activity, alcohol group as acceptor;protein binding;protein dimerization activity;protein heterodimerization activity;protein homodimerization activity;protein kinase act…	CD40 receptor complex;cell part;cytoplasm;cytoplasmic part;cytosol;cytosolic part;IkappaB kinase complex;internal side of plasma membrane;intracellular membrane-bounded organelle;intracellular organelle;intracellular part;macromolecular complex;membrane part;membrane raft;membrane-bounded organelle;nucleus;organelle;plasma membrane part;protein complex;receptor complex	biological regulation;cellular metabolic process;cellular process;homeostatic process;immune system process;macromolecule metabolic process;macromolecule modification;metabolic process;multi-organism process;peptidyl-amino acid modification;phosphorus metabolic process;primary metabolic process;protein metabolic process;protein modification process;protein phosphorylation;regulation of transport;…	cell part;cytoplasm;cytosol;intracellular membrane-bounded organelle;intracellular organelle;macromolecular complex;nucleus;organelle;protein complex;receptor complex	Acute myeloid leukemia;Adipocytokine signaling pathway;Apoptosis;B cell receptor signaling pathway;Chagas disease (American trypanosomiasis);Chemokine signaling pathway;Chronic myeloid leukemia;Cytosolic DNA-sensing pathway;Epithelial cell signaling in Helicobacter pylori infection;Hepatitis C;Insulin signaling pathway;MAPK signaling pathway;Neurotrophin signaling pathway;NOD-like receptor signal…	IKKbetaNEMObind;Pkinase	ACACTGG,MIR-199A,MIR-199B;ACTIVATION_OF_NF_KAPPAB_TRANSCRIPTION_FACTOR;BIOCARTA_41BB_PATHWAY;BIOCARTA_AKT_PATHWAY;BIOCARTA_CD40_PATHWAY;BIOCARTA_IL1R_PATHWAY;BIOCARTA_KERATINOCYTE_PATHWAY;BIOCARTA_MAPK_PATHWAY;BIOCARTA_NFKB_PATHWAY;BIOCARTA_NTHI_PATHWAY;BIOCARTA_RACCYCD_PATHWAY;BIOCARTA_RELA_PATHWAY;BIOCARTA_STRESS_PATHWAY;BIOCARTA_TID_PATHWAY;BIOCARTA_TNFR2_PATHWAY;BIOCARTA_TOLL_PATHWAY;BONOME_O…	3D-structure;Acetylation;Alternativesplicing;ATP-binding;Completeproteome;Cytoplasm;Directproteinsequencing;Hydroxylation;Isopeptidebond;Kinase;Membrane;Nucleotide-binding;Nucleus;Phosphoprotein;Polymorphism;Referenceproteome;SCID;Serine/threonine-proteinkinase;S-nitrosylation;Transferase;Ublconjugation	BCL10-CHUK-BCL10-IKBKB complex;CASP8-CHUK-IKBKB-MALT1-BCL10 complex;CHUK-ERC1-IKBKB-IKBKG;CHUK-IKBKB-IKBKG complex;CHUK-IKBKB-MAP3K14 complex;I-kappa-B kinase (IKK) complex;IkappaB kinase complex (IKBKB, CHUK, IKBKAP, NFKBIA, RELA, MAP3K14);IKBKB-CDC37-KIAA1967-HSP90AB1-HSP90AA1 complex;IKBKG-IKBKB complex;IKKA-IKKB complex;IKKB-NIK complex;SRC-3 complex;TNF-alpha/NF-kappa B signaling complex (SE…	21	21	20	35.7	35.7	34.7	86.563	0	119.16	2098900000	1330600000	768280000	O14920;O14920-4;O14920-2;O14920-3	O14920;O14920-4;O14920-2	Inhibitor of nuclear factor kappa-B kinase subunit beta	IKBKB	358
-1.0526	-0.579636	-1.51172	-1.07742	-0.730723	-0.633933	-1.08511	-0.798864	-0.990842	-0.890211	-0.678015	-0.985213	-1.86251	-1.46469	-0.678229	-0.683646	-0.670449	-1.04967	0.746466	-0.990842	-0.890211	0.100631	0.330642	biological regulation;cellular component assembly;cellular component assembly at cellular level;cellular component organization;cellular component organization at cellular level;cellular component organization or biogenesis;cellular component organization or biogenesis at cellular level;cellular macromolecular complex assembly;cellular macromolecular complex subunit organization;cellular macromol…	acetyltransferase activity;catalytic activity;H4 histone acetyltransferase activity;histone acetyltransferase activity;lysine N-acetyltransferase activity;N-acetyltransferase activity;N-acyltransferase activity;transferase activity;transferase activity, transferring acyl groups;transferase activity, transferring acyl groups other than amino-acyl groups	cell part;chromatin;chromosomal part;cytoplasm;intracellular membrane-bounded organelle;intracellular organelle;intracellular organelle part;intracellular part;macromolecular complex;membrane-bounded organelle;nuclear chromatin;nuclear chromosome part;nuclear matrix;nuclear part;nucleoplasm;nucleus;organelle;organelle part;protein complex	biological regulation;cellular component assembly;cellular component organization;cellular macromolecular complex assembly;cellular metabolic process;cellular nitrogen compound metabolic process;cellular process;chromatin modification;chromatin organization;chromosome organization;DNA metabolic process;DNA packaging;gene silencing;histone modification;macromolecular complex assembly;macromolecule…	cell part;cytoplasm;intracellular membrane-bounded organelle;intracellular organelle;macromolecular complex;nucleoplasm;nucleus;organelle;protein complex		Hat1_N	AACTTT_UNKNOWN;ACETYLTRANSFERASE_ACTIVITY;ACEVEDO_LIVER_CANCER_WITH_H3K9ME3_DN;ATACTGT,MIR-144;BASAKI_YBX1_TARGETS_UP;BERENJENO_TRANSFORMED_BY_RHOA_UP;BIOPOLYMER_METABOLIC_PROCESS;BIOPOLYMER_MODIFICATION;BOYAULT_LIVER_CANCER_SUBCLASS_G123_UP;BROWNE_HCMV_INFECTION_48HR_UP;BRUINS_UVC_RESPONSE_LATE;BURTON_ADIPOGENESIS_PEAK_AT_16HR;BYSTRYKH_HEMATOPOIESIS_STEM_CELL_QTL_TRANS;CELLULAR_MACROMOLECULE_MET…	3D-structure;Acetylation;Acyltransferase;Alternativesplicing;Completeproteome;Cytoplasm;Nucleus;Polymorphism;Referenceproteome;Transferase	Histone H3.1 complex;Histone H3.3 complex	19	19	18	56.1	56.1	56.1	49.512	0	187.27	5453700000	2551800000	2901900000	O14929;O14929-2;REV__Q7LFX5	O14929;O14929-2	Histone acetyltransferase type B catalytic subunit	HAT1	360
NaN	1.73002	1.70078	1.98521	1.03449	1.3477	2.32616	NaN	NaN	NaN	2.21263	0.819258	3.22135	2.02021	1.97203	2.99003	1.85132	NaN	0.214702	1.7154	2.02021	0.304813	0.102022	biological regulation;biosynthetic process;catabolic process;cell surface receptor linked signaling pathway;cellular biosynthetic process;cellular catabolic process;cellular macromolecule biosynthetic process;cellular macromolecule catabolic process;cellular macromolecule metabolic process;cellular metabolic process;cellular nitrogen compound metabolic process;cellular process;cellular protein me…	acid-amino acid ligase activity;catalytic activity;ISG15 ligase activity;ligase activity;ligase activity, forming carbon-nitrogen bonds;small conjugating protein ligase activity;ubiquitin-protein ligase activity	cell part;cytoplasmic part;cytosol;intracellular organelle part;intracellular part;nuclear part;nucleoplasm;organelle part	biological regulation;biosynthetic process;catabolic process;cellular metabolic process;cellular nitrogen compound metabolic process;cellular process;DNA metabolic process;DNA repair;immune system process;macromolecule metabolic process;macromolecule modification;metabolic process;nitrogen compound metabolic process;nucleobase-containing compound metabolic process;primary metabolic process;protei…	cell part;cytosol;nucleoplasm	Parkinson's disease;Ubiquitin mediated proteolysis	UQ_con	ACID_AMINO_ACID_LIGASE_ACTIVITY;BAELDE_DIABETIC_NEPHROPATHY_DN;BIOCARTA_PARKIN_PATHWAY;BMI1_DN_MEL18_DN.V1_DN;BOCHKIS_FOXA2_TARGETS;BROWNE_INTERFERON_RESPONSIVE_GENES;BRUINS_UVC_RESPONSE_VIA_TP53_GROUP_A;BURTON_ADIPOGENESIS_PEAK_AT_0HR;CAGGTG_V$E12_Q6;CHICAS_RB1_TARGETS_SENESCENT;chr11q12;COULOUARN_TEMPORAL_TGFB1_SIGNATURE_DN;CSR_LATE_UP.V1_DN;DEBIASI_APOPTOSIS_BY_REOVIRUS_INFECTION_UP;DURAND_STR…	3D-structure;Alternativesplicing;Completeproteome;Directproteinsequencing;Ligase;Referenceproteome;Ublconjugation;Ublconjugationpathway		7	7	7	66	66	66	17.769	0	70.036	816880000	699990000	116890000	O14933;O14933-2	O14933	Ubiquitin/ISG15-conjugating enzyme E2 L6	UBE2L6	361
0.811313	0.7307	-0.116045	0.111464	0.257168	1.26695	0.780168	0.289857	0.101391	-0.281483	0.729137	0.560067	1.10611	0.478103	0.619083	0.649239	0.901861	0.81446	0.460575	0.289857	0.649239	0.359382	0.0677894	anatomical structure development;cell development;cellular developmental process;cellular metabolic process;cellular process;central nervous system neuron development;cerebellar Purkinje cell layer development;developmental process;electron transport chain;forebrain neuron development;generation of precursor metabolites and energy;hippocampus development;hypothalamus development;metabolic process…	catalytic activity;cation transmembrane transporter activity;hydrogen ion transmembrane transporter activity;inorganic cation transmembrane transporter activity;ion transmembrane transporter activity;monovalent inorganic cation transmembrane transporter activity;oxidoreductase activity;oxidoreductase activity, acting on diphenols and related substances as donors;oxidoreductase activity, acting on…	cell part;cytoplasmic part;intracellular membrane-bounded organelle;intracellular organelle;intracellular organelle part;intracellular part;membrane;membrane part;membrane-bounded organelle;mitochondrial inner membrane;mitochondrial membrane;mitochondrial part;mitochondrion;organelle;organelle inner membrane;organelle membrane;organelle part;respiratory chain	anatomical structure development;cell development;cellular metabolic process;cellular process;developmental process;generation of precursor metabolites and energy;metabolic process;small molecule metabolic process	cell part;intracellular membrane-bounded organelle;intracellular organelle;membrane;mitochondrion;organelle	Alzheimer's disease;Cardiac muscle contraction;Huntington's disease;Oxidative phosphorylation;Parkinson's disease	UcrQ	BLALOCK_ALZHEIMERS_DISEASE_DN;BURTON_ADIPOGENESIS_6;CAIRO_HEPATOBLASTOMA_CLASSES_DN;chr5q31;CREIGHTON_ENDOCRINE_THERAPY_RESISTANCE_3;DEMAGALHAES_AGING_DN;FLECHNER_BIOPSY_KIDNEY_TRANSPLANT_REJECTED_VS_OK_DN;GSE12845_IGD_NEG_BLOOD_VS_NAIVE_TONSIL_BCELL_UP;GSE14000_TRANSLATED_RNA_VS_MRNA_4H_LPS_DC_DN;GSE15324_NAIVE_VS_ACTIVATED_CD8_TCELL_DN;GSE16522_ANTI_CD3CD28_STIM_VS_UNSTIM_MEMORY_CD8_TCELL_UP;GS…	Acetylation;Completeproteome;Directproteinsequencing;Diseasemutation;Electrontransport;Isopeptidebond;Membrane;Mitochondrion;Mitochondrioninnermembrane;Referenceproteome;Respiratorychain;Transport;Ublconjugation		5	5	5	54.9	54.9	54.9	9.9062	0	29.731	4162500000	3048600000	1113900000	O14949	O14949	Cytochrome b-c1 complex subunit 8	UQCRQ	362
0.205889	1.68997	1.31405	1.27464	-0.843882	0.83064	0.137279	1.71381	1.103	0.256011	1.97625	0.848768	0.620622	1.23395	1.28161	1.10045	1.49474	0.331585	0.580644	1.103	1.10045	-0.00255144	0.492935	axon guidance;biological adhesion;biological regulation;cell adhesion;cell surface receptor linked signaling pathway;cell-cell adhesion;cellular process;cellular response to stimulus;chemotaxis;enzyme linked receptor protein signaling pathway;ephrin receptor signaling pathway;establishment of localization;establishment of localization in cell;establishment of protein localization;establishment of…	binding;calcium ion binding;cation binding;ion binding;metal ion binding	actin filament bundle;actomyosin;apical part of cell;cell part;contractile fiber part;cytoplasmic part;cytoskeletal part;cytosol;extracellular membrane-bounded organelle;extracellular organelle;extracellular region part;extracellular vesicular exosome;intracellular organelle part;intracellular part;macromolecular complex;membrane-bounded organelle;membrane-bounded vesicle;myosin complex;myosin II…	biological adhesion;biological regulation;cell adhesion;cellular process;establishment of localization;locomotion;multicellular organismal process;muscle contraction;protein targeting;protein transport;response to chemical stimulus;response to external stimulus;response to stimulus;signal transduction;transport	apical part of cell;cell part;cytosol;extracellular organelle;macromolecular complex;organelle;protein complex;vesicle	Focal adhesion;Leukocyte transendothelial migration;Regulation of actin cytoskeleton;Tight junction	EF-hand_1;EF-hand_7	AACTTT_UNKNOWN;ALFANO_MYC_TARGETS;BAELDE_DIABETIC_NEPHROPATHY_DN;BASSO_B_LYMPHOCYTE_NETWORK;BERENJENO_TRANSFORMED_BY_RHOA_DN;BLALOCK_ALZHEIMERS_DISEASE_DN;BONOME_OVARIAN_CANCER_SURVIVAL_OPTIMAL_DEBULKING;BRUINS_UVC_RESPONSE_LATE;BRUINS_UVC_RESPONSE_VIA_TP53_GROUP_A;CACGTG_V$MYC_Q2;CAIRO_HEPATOBLASTOMA_CLASSES_DN;CHARAFE_BREAST_CANCER_LUMINAL_VS_BASAL_DN;CHEN_METABOLIC_SYNDROM_NETWORK;CHIARADONNA_…	Calcium;Completeproteome;Metal-binding;Motorprotein;Muscleprotein;Myosin;Phosphoprotein;Polymorphism;Referenceproteome;Repeat	WIP-WASp-actin-myosin-IIa complex	11	11	4	62.6	62.6	29.2	19.794	0	323.31	35964000000	27853000000	8111400000	P19105;O14950	P19105;O14950	Myosin regulatory light chain 12A;Myosin regulatory light chain 12B	MYL12A;MYL12B	363
-0.134898	0.493266	0.486081	0.485937	-0.218178	0.277144	0.542147	0.395547	-0.143411	0.666085	0.816598	0.392914	0.0588364	0.32222	0.584464	0.551937	0.343545	0.274567	0.140686	0.395547	0.392914	-0.00263268	0.493067	biological regulation;cell surface receptor linked signaling pathway;cellular component organization;cellular component organization or biogenesis;cellular localization;cellular macromolecule localization;cellular membrane organization;cellular process;cellular protein localization;cellular response to stimulus;endosome to lysosome transport;endosome transport;enzyme linked receptor protein signa…	binding;cation binding;ion binding;metal ion binding;protein binding;protein domain specific binding	cell part;cytoplasm;cytoplasmic membrane-bounded vesicle;cytoplasmic part;cytoplasmic vesicle;cytosol;early endosome;early endosome membrane;endosomal part;endosome;endosome membrane;extracellular membrane-bounded organelle;extracellular organelle;extracellular region part;extracellular vesicular exosome;intracellular membrane-bounded organelle;intracellular organelle;intracellular organelle part…	biological regulation;cellular component organization;cellular localization;cellular membrane organization;cellular process;endosome transport;establishment of localization;Golgi vesicle transport;localization;membrane invagination;membrane organization;protein targeting;protein transport;regulation of protein modification process;response to stimulus;signal transduction;transport;vacuolar transp…	cell part;cytoplasm;cytoplasmic membrane-bounded vesicle;cytosol;endosome;extracellular organelle;intracellular membrane-bounded organelle;intracellular organelle;membrane;organelle;vesicle	Endocytosis;Phagosome	FYVE;Hrs_helical;VHS	BIOPOLYMER_CATABOLIC_PROCESS;BIOPOLYMER_METABOLIC_PROCESS;BOYAULT_LIVER_CANCER_SUBCLASS_G3_UP;CATABOLIC_PROCESS;CELL_PROLIFERATION_GO_0008283;chr17q25;ENK_UV_RESPONSE_EPIDERMIS_UP;FIRESTEIN_PROLIFERATION;GCM_GSPT1;GCM_GSTA4;GCM_MLL;GCM_NF2;GRADE_COLON_CANCER_UP;GSE11864_CSF1_IFNG_VS_CSF1_IFNG_PAM3CYS_IN_MAC_DN;GSE11864_CSF1_IFNG_VS_CSF1_PAM3CYS_IN_MAC_DN;GSE11864_UNTREATED_VS_CSF1_IN_MAC_UP;GSE11…	3D-structure;Acetylation;Alternativesplicing;Completeproteome;Cytoplasm;Endosome;Membrane;Metal-binding;Phosphoprotein;Polymorphism;Proteintransport;Referenceproteome;Transport;Ublconjugation;Zinc;Zinc-finger	RIN1-STAM2-HRS complex;SNARE complex (HGS, SNAP25, STX13)	15	15	15	17.1	17.1	17.1	86.191	0	44.37	1638900000	1068400000	570520000	O14964;O14964-2	O14964;O14964-2	Hepatocyte growth factor-regulated tyrosine kinase substrate	HGS	364
1.09907	1.25912	1.07169	1.25418	1.33501	1.06453	0.57435	1.21371	1.03677	1.34448	0.949522	1.51138	1.32735	0.906009	1.2292	0.812935	0.562985	1.27718	0.991347	1.09907	1.2292	0.130129	0.288307	establishment of localization;establishment of localization in cell;establishment of protein localization;intracellular protein transport;intracellular transport;protein transport;transport	protein transporter activity;substrate-specific transporter activity;transporter activity	cell part;cytoplasmic part;endosome;intracellular membrane-bounded organelle;intracellular organelle;intracellular part;membrane-bounded organelle;nucleus;organelle	establishment of localization;protein transport;transport	cell part;endosome;intracellular membrane-bounded organelle;intracellular organelle;nucleus;organelle		Vps26	BRUINS_UVC_RESPONSE_LATE;CHIARADONNA_NEOPLASTIC_TRANSFORMATION_CDC25_DN;chr21q22;DIAZ_CHRONIC_MEYLOGENOUS_LEUKEMIA_UP;ENK_UV_RESPONSE_KERATINOCYTE_DN;GSE10325_CD4_TCELL_VS_BCELL_UP;GSE11864_UNTREATED_VS_CSF1_IN_MAC_DN;GSE11864_UNTREATED_VS_CSF1_PAM3CYS_IN_MAC_UP;GSE11924_TH1_VS_TH17_CD4_TCELL_DN;GSE11924_TH1_VS_TH2_CD4_TCELL_DN;GSE14308_TH17_VS_INDUCED_TREG_UP;GSE1460_CD4_THYMOCYTE_VS_NAIVE_CD4_T…	Alternativesplicing;Completeproteome;Referenceproteome		8	8	8	40.4	40.4	40.4	33.01	0	137.95	1278100000	990080000	288000000	O14972;O14972-2	O14972;O14972-2	Down syndrome critical region protein 3	DSCR3	367
-0.242597	-0.0743437	0.645776	0.951819	-0.276188	-0.198652	0.0921588	1.41026	-0.208866	0.643256	0.591581	0.078027	0.352121	0.60885	0.532774	0.925171	0.384248	0.284204	0.274323	-0.0743437	0.532774	0.607118	0.00617647	biological regulation;cell cycle;cell cycle phase;cell cycle process;cellular component organization;cellular component organization at cellular level;cellular component organization or biogenesis;cellular component organization or biogenesis at cellular level;cellular macromolecule metabolic process;cellular metabolic process;cellular process;cellular protein metabolic process;cellular response …	14-3-3 protein binding;binding;enzyme binding;enzyme inhibitor activity;enzyme regulator activity;kinase binding;molecular transducer activity;phosphatase regulator activity;protein binding;protein kinase binding;signal transducer activity	actin cytoskeleton;adherens junction;anchoring junction;cell junction;cell part;cell-substrate adherens junction;cell-substrate junction;centrosome;chromosomal part;contractile fiber;cytoplasm;cytoplasmic part;cytoskeletal part;cytoskeleton;cytosol;focal adhesion;intracellular non-membrane-bounded organelle;intracellular organelle;intracellular organelle part;intracellular part;kinetochore;macrom…	biological regulation;cell cycle;cellular component organization;cellular metabolic process;cellular process;macromolecule metabolic process;macromolecule modification;metabolic process;microtubule organizing center organization;mitosis;mitotic cell cycle;nuclear division;organelle fission;organelle organization;phosphorus metabolic process;primary metabolic process;protein dephosphorylation;prot…	cell part;centrosome;cytoplasm;cytoskeleton;cytosol;intracellular non-membrane-bounded organelle;intracellular organelle;kinetochore;macromolecular complex;microtubule organizing center;nucleoplasm;organelle;protein complex;protein serine/threonine phosphatase complex	Focal adhesion;Long-term potentiation;Regulation of actin cytoskeleton;Vascular smooth muscle contraction	Ank	AACTTT_UNKNOWN;AATGTGA,MIR-23A,MIR-23B;AGUIRRE_PANCREATIC_CANCER_COPY_NUMBER_DN;ATGTTAA,MIR-302C;BENPORATH_MYC_MAX_TARGETS;BLALOCK_ALZHEIMERS_DISEASE_DN;BRUINS_UVC_RESPONSE_LATE;CAGTCAC,MIR-134;CATTTCA,MIR-203;CCAWWNAAGG_V$SRF_Q4;CHEN_HOXA5_TARGETS_9HR_UP;chr12q15;CTACTGT,MIR-199A;CTTTGT_V$LEF1_Q2;DACOSTA_UV_RESPONSE_VIA_ERCC3_COMMON_DN;DACOSTA_UV_RESPONSE_VIA_ERCC3_DN;DANG_BOUND_BY_MYC;DAZARD_RE…	3D-structure;Alternativesplicing;ANKrepeat;Completeproteome;Cytoplasm;Directproteinsequencing;Hydroxylation;Phosphoprotein;Polymorphism;Referenceproteome;Repeat	MRIP-MBS complex;MRIP-MBS-RHOA complex	29	29	29	34.7	34.7	34.7	109.1	0	323.31	2012800000	1448100000	564720000	O14974-4;O14974;O14974-3;O14974-5;O14974-2	O14974-4;O14974;O14974-3;O14974-5;O14974-2	Protein phosphatase 1 regulatory subunit 12A	PPP1R12A	368
-0.00468944	-0.737312	-2.34162	-1.8694	-0.832986	-0.90038	1.0023	-1.89853	0.169928	-0.844427	-0.428447	-1.02388	-1.61658	-2.04993	-1.23078	-0.628489	-1.19249	-0.301568	0.6152	-0.832986	-1.02388	-0.190891	0.223033	bile acid biosynthetic process;bile acid metabolic process;biosynthetic process;carboxylic acid biosynthetic process;carboxylic acid catabolic process;carboxylic acid metabolic process;catabolic process;cellular biosynthetic process;cellular catabolic process;cellular ketone metabolic process;cellular lipid catabolic process;cellular lipid metabolic process;cellular metabolic process;cellular pro…	acid-thiol ligase activity;adenyl nucleotide binding;adenyl ribonucleotide binding;ATP binding;binding;catalytic activity;enzyme binding;fatty acid ligase activity;fatty acid transporter activity;ligase activity;ligase activity, forming carbon-sulfur bonds;lipid transporter activity;long-chain fatty acid-CoA ligase activity;nucleotide binding;phytanate-CoA ligase activity;pristanate-CoA ligase ac…	cell part;cytoplasmic part;endoplasmic reticulum lumen;endoplasmic reticulum membrane;endoplasmic reticulum part;extracellular membrane-bounded organelle;extracellular organelle;extracellular region part;extracellular vesicular exosome;integral to endoplasmic reticulum membrane;integral to membrane;integral to organelle membrane;integral to peroxisomal membrane;intracellular membrane-bounded orga…	biosynthetic process;catabolic process;cellular ketone metabolic process;cellular lipid metabolic process;cellular metabolic process;cellular process;lipid metabolic process;metabolic process;organic acid metabolic process;primary metabolic process;small molecule metabolic process	cell part;extracellular organelle;intracellular membrane-bounded organelle;intracellular organelle;membrane;microbody;mitochondrion;organelle;vesicle	Peroxisome;PPAR signaling pathway	AMP-binding;AMP-binding_C	ACOSTA_PROLIFERATION_INDEPENDENT_MYC_TARGETS_UP;ADDYA_ERYTHROID_DIFFERENTIATION_BY_HEMIN;BCAT_BILD_ET_AL_UP;BENPORATH_EED_TARGETS;BENPORATH_ES_WITH_H3K27ME3;BENPORATH_PRC2_TARGETS;BENPORATH_SUZ12_TARGETS;BLUM_RESPONSE_TO_SALIRASIB_DN;CAGGTG_V$E12_Q6;CAIRO_HEPATOBLASTOMA_DN;CAR_HPX;CAR_IGFBP1;CARBOXYLIC_ACID_METABOLIC_PROCESS;CASORELLI_ACUTE_PROMYELOCYTIC_LEUKEMIA_DN;CELLULAR_LIPID_METABOLIC_PROCE…	Acetylation;Alternativesplicing;ATP-binding;Completeproteome;Endoplasmicreticulum;Fattyacidmetabolism;Ligase;Lipidmetabolism;Membrane;Nucleotide-binding;Peroxisome;Phosphoprotein;Polymorphism;Referenceproteome;Transmembrane;Transmembranehelix		25	25	25	52.6	52.6	52.6	70.311	0	156.97	1971100000	998500000	972650000	O14975;O14975-2	O14975;O14975-2	Very long-chain acyl-CoA synthetase	SLC27A2	369
-0.593443	-0.194962	0.377101	0.439072	-0.564431	-0.655359	-0.481642	-0.190222	-0.987511	-0.446974	-0.017417	0.107913	-0.932824	0.422771	0.359555	-0.204368	0.0757323	-0.289027	0.328047	-0.481642	-0.017417	0.464225	0.0274504	anatomical structure development;anatomical structure morphogenesis;biological regulation;cell cycle;cell development;cell differentiation;cellular component disassembly;cellular component disassembly at cellular level;cellular component organization;cellular component organization at cellular level;cellular component organization or biogenesis;cellular component organization or biogenesis at cel…	adenyl nucleotide binding;adenyl ribonucleotide binding;ATP binding;binding;catalytic activity;kinase activity;nucleotide binding;phosphotransferase activity, alcohol group as acceptor;protein kinase activity;protein serine/threonine kinase activity;purine nucleotide binding;purine ribonucleoside triphosphate binding;purine ribonucleotide binding;ribonucleotide binding;transferase activity;transf…	adherens junction;anchoring junction;cell junction;cell part;cell-substrate adherens junction;cell-substrate junction;cytoplasmic part;focal adhesion;Golgi apparatus;intracellular membrane-bounded organelle;intracellular organelle;intracellular part;membrane;membrane-bounded organelle;organelle;perinuclear region of cytoplasm	anatomical structure development;anatomical structure morphogenesis;biological regulation;cell cycle;cell development;cell differentiation;cellular component disassembly;cellular component organization;cellular membrane organization;cellular process;developmental process;endocytosis;endoplasmic reticulum organization;establishment of localization;Golgi organization;membrane invagination;membrane …	cell part;Golgi apparatus;intracellular membrane-bounded organelle;intracellular organelle;membrane;organelle		DnaJ;Pkinase;PTEN_C2	ACEVEDO_LIVER_CANCER_UP;ACEVEDO_NORMAL_TISSUE_ADJACENT_TO_LIVER_TUMOR_UP;AKT_UP.V1_UP;AKT_UP_MTOR_DN.V1_UP;AMIT_EGF_RESPONSE_480_HELA;BENPORATH_MYC_MAX_TARGETS;BLALOCK_ALZHEIMERS_DISEASE_UP;BREDEMEYER_RAG_SIGNALING_NOT_VIA_ATM_UP;chr4p16;DANG_BOUND_BY_MYC;FINETTI_BREAST_CANCERS_KINOME_BLUE;GSE11924_TFH_VS_TH17_CD4_TCELL_UP;GSE12845_IGD_POS_BLOOD_VS_DARKZONE_GC_TONSIL_BCELL_UP;GSE12845_PRE_GC_VS_D…	3D-structure;Acetylation;Alternativesplicing;ATP-binding;Cellcycle;Celljunction;Completeproteome;Cytoplasm;Golgiapparatus;Kinase;Nucleotide-binding;Phosphoprotein;Polymorphism;Referenceproteome;Serine/threonine-proteinkinase;Transferase		19	19	19	24.9	24.9	24.9	143.19	0	153.19	1041500000	599630000	441900000	O14976;O14976-2	O14976;O14976-2	Cyclin-G-associated kinase	GAK	370
-0.0509572	-0.03041	-1.00632	-1.03305	0.0726706	-0.328659	-0.160499	-0.496392	0.124237	0.0105048	-0.624052	-0.473437	-0.425572	-0.302092	-0.57267	0.189777	-0.86223	-0.210424	0.828967	-0.160499	-0.425572	-0.265073	0.142488	biological regulation;biosynthetic process;cellular biosynthetic process;cellular macromolecule biosynthetic process;cellular macromolecule metabolic process;cellular metabolic process;cellular nitrogen compound metabolic process;cellular process;macromolecule biosynthetic process;macromolecule metabolic process;metabolic process;nitrogen compound metabolic process;nucleic acid metabolic process;…	binding;DNA binding;double-stranded DNA binding;mRNA binding;nucleic acid binding;nucleotide binding;poly(A) RNA binding;poly(G) RNA binding;poly-purine tract binding;RNA binding;single-stranded DNA binding;single-stranded RNA binding;structure-specific DNA binding	cell part;cytoplasm;extracellular membrane-bounded organelle;extracellular organelle;extracellular region part;extracellular vesicular exosome;intracellular membrane-bounded organelle;intracellular organelle;intracellular organelle part;intracellular part;macromolecular complex;membrane-bounded organelle;membrane-bounded vesicle;nuclear part;nucleoplasm;nucleus;organelle;organelle part;ribonucleo…	biological regulation;biosynthetic process;cellular metabolic process;cellular nitrogen compound metabolic process;cellular process;macromolecule metabolic process;metabolic process;nitrogen compound metabolic process;nucleobase-containing compound metabolic process;primary metabolic process;RNA metabolic process;RNA processing	cell part;cytoplasm;extracellular organelle;intracellular membrane-bounded organelle;intracellular organelle;macromolecular complex;nucleoplasm;nucleus;organelle;ribonucleoprotein complex;spliceosomal complex;vesicle		RRM_1		Acetylation;Activator;Alternativesplicing;Completeproteome;Cytoplasm;Directproteinsequencing;Diseasemutation;DNA-binding;Limb-girdlemusculardystrophy;Methylation;Nucleus;Phosphoprotein;Referenceproteome;Repeat;Repressor;RNA-binding;Transcription;Transcriptionregulation	Large Drosha complex	18	17	2	39.8	37.9	10.2	46.437	0	275.41	17591000000	10141000000	7449800000	O14979	O14979	Heterogeneous nuclear ribonucleoprotein D-like	HNRNPDL	371
-0.0476033	-0.17009	-0.990839	-1.09877	0.205007	-1.30712	0.105846	NaN	NaN	0.0911359	-0.835473	-0.608532	-0.344807	-0.116848	-0.534439	0.197912	NaN	-0.236779	0.537636	-0.17009	-0.290793	-0.120703	0.318708	biological regulation;biosynthetic process;cellular biosynthetic process;cellular macromolecule biosynthetic process;cellular macromolecule metabolic process;cellular metabolic process;cellular nitrogen compound metabolic process;cellular process;macromolecule biosynthetic process;macromolecule metabolic process;metabolic process;nitrogen compound metabolic process;nucleic acid metabolic process;…	binding;DNA binding;double-stranded DNA binding;mRNA binding;nucleic acid binding;nucleotide binding;poly(A) RNA binding;poly(G) RNA binding;poly-purine tract binding;RNA binding;single-stranded DNA binding;single-stranded RNA binding;structure-specific DNA binding	cell part;cytoplasm;extracellular membrane-bounded organelle;extracellular organelle;extracellular region part;extracellular vesicular exosome;intracellular membrane-bounded organelle;intracellular organelle;intracellular organelle part;intracellular part;macromolecular complex;membrane-bounded organelle;membrane-bounded vesicle;nuclear part;nucleoplasm;nucleus;organelle;organelle part;ribonucleo…	biological regulation;biosynthetic process;cellular metabolic process;cellular nitrogen compound metabolic process;cellular process;macromolecule metabolic process;metabolic process;nitrogen compound metabolic process;nucleobase-containing compound metabolic process;primary metabolic process;RNA metabolic process;RNA processing	cell part;cytoplasm;extracellular organelle;intracellular membrane-bounded organelle;intracellular organelle;macromolecular complex;nucleoplasm;nucleus;organelle;ribonucleoprotein complex;spliceosomal complex;vesicle		RRM_1		Acetylation;Activator;Alternativesplicing;Completeproteome;Cytoplasm;Directproteinsequencing;Diseasemutation;DNA-binding;Limb-girdlemusculardystrophy;Methylation;Nucleus;Phosphoprotein;Referenceproteome;Repeat;Repressor;RNA-binding;Transcription;Transcriptionregulation	Large Drosha complex	17	1	1	58.2	7.4	7.4	27.191	0	44.912	656830000	387830000	269010000	O14979-3;O14979-2	O14979-3;O14979-2	Heterogeneous nuclear ribonucleoprotein D-like	HNRNPDL	372
-0.481367	-0.490679	-0.120711	-0.212601	-0.483642	-0.335693	-0.179413	-0.122964	-0.596512	0.0797056	-0.196866	-0.33593	-0.468603	-0.277067	-0.297511	-0.227824	-0.0426778	-0.460447	0.314881	-0.335693	-0.277067	0.0586262	0.39474	biological regulation;cell cycle;cell surface receptor linked signaling pathway;cellular localization;cellular macromolecule localization;cellular process;cellular protein localization;cellular response to stimulus;enzyme linked receptor protein signaling pathway;establishment of localization;establishment of localization in cell;establishment of organelle localization;establishment of protein lo…	binding;nucleic acid binding;nucleocytoplasmic transporter activity;protein transporter activity;RNA binding;substrate-specific transporter activity;transporter activity	annulate lamellae;Cajal body;cell part;chromosomal part;cytoplasm;cytoplasmic part;cytosol;envelope;intracellular membrane-bounded organelle;intracellular non-membrane-bounded organelle;intracellular organelle;intracellular organelle part;intracellular part;kinetochore;macromolecular complex;membrane;membrane part;membrane-bounded organelle;non-membrane-bounded organelle;nuclear body;nuclear enve…	biological regulation;cell cycle;cellular localization;cellular process;establishment of localization;localization;macromolecule metabolic process;metabolic process;mitotic cell cycle;nuclear transport;nucleobase-containing compound transport;nucleocytoplasmic transport;protein targeting;protein transport;regulation of cell cycle;regulation of organelle organization;regulation of transport;respon…	cell part;cytoplasm;cytosol;intracellular membrane-bounded organelle;intracellular non-membrane-bounded organelle;intracellular organelle;kinetochore;macromolecular complex;membrane;nuclear envelope;nucleolus;nucleoplasm;nucleus;organelle;protein complex;ribonucleoprotein complex	Ribosome biogenesis in eukaryotes;RNA transport	CRM1_C;IBN_N;Xpo1	AACTTT_UNKNOWN;ABRAMSON_INTERACT_WITH_AIRE;ACACTAC,MIR-142-3P;ACEVEDO_LIVER_CANCER_UP;ACEVEDO_LIVER_TUMOR_VS_NORMAL_ADJACENT_TISSUE_UP;ACTWSNACTNY_UNKNOWN;AGGAGTG,MIR-483;ALCALA_APOPTOSIS;ATGTCAC,MIR-489;BAELDE_DIABETIC_NEPHROPATHY_DN;BERENJENO_TRANSFORMED_BY_RHOA_UP;BIOCARTA_PTC1_PATHWAY;BOUDOUKHA_BOUND_BY_IGF2BP2;BOYAULT_LIVER_CANCER_SUBCLASS_G3_UP;BURTON_ADIPOGENESIS_7;BURTON_ADIPOGENESIS_PEAK…	3D-structure;Acetylation;Completeproteome;Cytoplasm;Directproteinsequencing;Host-virusinteraction;mRNAtransport;Nucleus;Phosphoprotein;Proteintransport;Referenceproteome;Repeat;RNA-binding;Transport	CRM1-RAN-PHAX-CBC complex (cap binding complex);CRM1-Survivin mitotic complex;CRM1-Survivin-AuroraB mitotic complex;Snurportin-CRM1-RanGTP complex	53	53	53	57.7	57.7	57.7	123.38	0	323.31	28859000000	16264000000	12595000000	O14980	O14980	Exportin-1	XPO1	373
-0.788907	-0.492933	-0.556828	-0.530075	-0.648463	-1.01685	-0.841855	-0.871687	-0.900341	-0.575591	-0.321404	-0.729371	-1.20407	-0.709031	-0.268488	-0.49647	-1.26626	-0.514881	0.646421	-0.788907	-0.575591	0.213316	0.184781	biological regulation;negative regulation of binding;negative regulation of biological process;negative regulation of biosynthetic process;negative regulation of cellular biosynthetic process;negative regulation of cellular macromolecule biosynthetic process;negative regulation of cellular metabolic process;negative regulation of cellular process;negative regulation of chromatin binding;negative …	adenyl nucleotide binding;adenyl ribonucleotide binding;ATP binding;binding;catalytic activity;DNA binding;helicase activity;hydrolase activity;hydrolase activity, acting on acid anhydrides;hydrolase activity, acting on acid anhydrides, in phosphorus-containing anhydrides;nucleic acid binding;nucleic acid binding transcription factor activity;nucleoside-triphosphatase activity;nucleotide binding;…	cell part;intracellular membrane-bounded organelle;intracellular organelle;intracellular part;membrane-bounded organelle;nucleus;organelle	biological regulation	cell part;intracellular membrane-bounded organelle;intracellular organelle;nucleus;organelle		DUF3535;Helicase_C;SNF2_N	AATGTGA,MIR-23A,MIR-23B;ACEVEDO_LIVER_CANCER_UP;ATGTACA,MIR-493;ATGTTAA,MIR-302C;CCGNMNNTNACG_UNKNOWN;chr10q22;CUI_TCF21_TARGETS_2_DN;DACOSTA_UV_RESPONSE_VIA_ERCC3_DN;DACOSTA_UV_RESPONSE_VIA_ERCC3_TTD_DN;FIGUEROA_AML_METHYLATION_CLUSTER_3_UP;FIGUEROA_AML_METHYLATION_CLUSTER_6_UP;FIGUEROA_AML_METHYLATION_CLUSTER_7_UP;GINESTIER_BREAST_CANCER_20Q13_AMPLIFICATION_DN;GNF2_RBBP6;GRADE_COLON_CANCER_UP;G…	Alternativesplicing;ATP-binding;Completeproteome;Directproteinsequencing;DNA-binding;Helicase;Hydrolase;Nucleotide-binding;Nucleus;Referenceproteome;Repeat		26	26	26	19.7	19.7	19.7	206.89	0	120.85	1137000000	604030000	532980000	O14981;O14981-2	O14981	TATA-binding protein-associated factor 172	BTAF1	374
-0.468105	-0.967964	-0.137347	-0.230762	-0.559313	-1.19654	-1.28561	-0.447815	-0.392727	-0.129874	-0.622027	-0.1527	-0.408036	-0.349136	-0.417351	-0.617523	-0.692102	-0.273032	0.172287	-0.468105	-0.408036	0.0600688	0.392478	anatomical structure development;cellular component organization;cellular component organization at cellular level;cellular component organization or biogenesis;cellular component organization or biogenesis at cellular level;cellular process;COPII vesicle coating;developmental process;endoplasmic reticulum organization;establishment of localization;establishment of protein localization;organelle …		cell part;cytoplasm;cytoplasmic part;cytosol;endoplasmic reticulum membrane;endoplasmic reticulum part;Golgi apparatus;Golgi apparatus part;Golgi membrane;intracellular membrane-bounded organelle;intracellular organelle;intracellular organelle part;intracellular part;membrane;membrane part;membrane-bounded organelle;organelle;organelle membrane;organelle part	anatomical structure development;cellular component organization;cellular process;developmental process;endoplasmic reticulum organization;establishment of localization;organelle organization;protein transport;transport;vesicle organization	cell part;cytoplasm;cytosol;Golgi apparatus;intracellular membrane-bounded organelle;intracellular organelle;membrane;organelle		Sec16;Sec16_C	BROWNE_HCMV_INFECTION_1HR_DN;BROWNE_HCMV_INFECTION_48HR_DN;BYSTRYKH_HEMATOPOIESIS_STEM_CELL_QTL_TRANS;CAFFAREL_RESPONSE_TO_THC_24HR_5_DN;CHARAFE_BREAST_CANCER_LUMINAL_VS_BASAL_UP;chr9q34;DEBIASI_APOPTOSIS_BY_REOVIRUS_INFECTION_DN;GSE15750_DAY6_VS_DAY10_EFF_CD8_TCELL_DN;GSE15750_DAY6_VS_DAY10_TRAF6KO_EFF_CD8_TCELL_DN;GSE17721_0.5H_VS_12H_POLYIC_BMDM_UP;GSE17721_0.5H_VS_4H_LPS_BMDM_UP;GSE17721_0.5H…	Alternativesplicing;Completeproteome;Endoplasmicreticulum;ER-Golgitransport;Golgiapparatus;Membrane;Phosphoprotein;Polymorphism;Proteintransport;Referenceproteome;Transport	TNF-alpha/NF-kappa B signaling complex (SEC16A, CHUK, IKBKB, NFKB2, REL, IKBKG, MAP3K14, RELA, FBXW7, USP2)	40	40	40	32.7	32.7	32.7	228.87	0	323.31	2235200000	1138700000	1096500000	O15027-2;O15027-4;O15027-3;O15027;O15027-5	O15027-2;O15027-4;O15027-3;O15027;O15027-5	Protein transport protein Sec16A	SEC16A	379
0.408829	0.891163	0.626675	0.709653	-0.368146	-1.40098	-0.583766	-0.739305	-0.494082	0.110526	0.783895	0.527669	-0.026592	0.364527	0.65404	0.0261668	-0.668891	0.640823	0.241578	-0.368146	0.364527	0.732673	0.00129131	anatomical structure development;anatomical structure formation involved in morphogenesis;biological regulation;brain development;cell proliferation;cell surface receptor linked signaling pathway;cellular process;cellular response to stimulus;developmental process;neural precursor cell proliferation;neural tube closure;neuroblast proliferation;organ development;positive regulation of axonogenesis…	molecular transducer activity;receptor activity;semaphorin receptor activity;signal transducer activity;signaling receptor activity;transmembrane signaling receptor activity	cell part;cell surface;extracellular membrane-bounded organelle;extracellular organelle;extracellular region part;extracellular vesicular exosome;integral to membrane;integral to plasma membrane;intracellular;intrinsic to membrane;intrinsic to plasma membrane;membrane part;membrane-bounded organelle;membrane-bounded vesicle;organelle;plasma membrane part;vesicle	anatomical structure development;anatomical structure formation involved in morphogenesis;biological regulation;cell proliferation;cellular process;developmental process;regulation of protein modification process;response to stimulus;signal transduction	cell part;cell surface;extracellular organelle;intracellular;organelle;vesicle	Axon guidance	Plexin_cytopl;PSI;Sema;TIG	AMUNDSON_DNA_DAMAGE_RESPONSE_TP53;BAELDE_DIABETIC_NEPHROPATHY_DN;BLALOCK_ALZHEIMERS_DISEASE_INCIPIENT_UP;BLALOCK_ALZHEIMERS_DISEASE_UP;BURTON_ADIPOGENESIS_7;BURTON_ADIPOGENESIS_8;BYSTRYKH_HEMATOPOIESIS_STEM_CELL_QTL_TRANS;CAIRO_HEPATOBLASTOMA_CLASSES_DN;CHEN_METABOLIC_SYNDROM_NETWORK;chr22q13;DEBIASI_APOPTOSIS_BY_REOVIRUS_INFECTION_DN;DELYS_THYROID_CANCER_UP;ESC_J1_UP_LATE.V1_UP;ESC_V6.5_UP_LATE.…	3D-structure;Cellmembrane;Completeproteome;Developmentalprotein;Disulfidebond;Glycoprotein;Membrane;Phosphoprotein;Polymorphism;Receptor;Referenceproteome;Repeat;Signal;Transmembrane;Transmembranehelix		42	42	41	31	31	30.6	205.12	0	256.08	3534000000	2358100000	1175900000	O15031	O15031	Plexin-B2	PLXNB2	380
0.498219	0.333856	-0.481074	-0.367195	0.543426	0.293782	0.265231	-0.175637	0.528526	0.196226	-0.0192979	-0.0830831	0.193868	-0.13654	-0.0417615	0.461233	0.148183	0.395713	0.813699	0.293782	0.148183	-0.145599	0.282842	cellular macromolecule metabolic process;cellular metabolic process;cellular nitrogen compound metabolic process;cellular process;macromolecule metabolic process;metabolic process;nitrogen compound metabolic process;nucleic acid metabolic process;nucleobase-containing compound metabolic process;primary metabolic process;RNA metabolic process;RNA processing	binding;nucleotide binding	cell part;intracellular membrane-bounded organelle;intracellular organelle;intracellular organelle part;intracellular part;membrane-bounded organelle;nuclear part;nucleoplasm;nucleus;organelle;organelle part	cellular metabolic process;cellular nitrogen compound metabolic process;cellular process;macromolecule metabolic process;metabolic process;nitrogen compound metabolic process;nucleobase-containing compound metabolic process;primary metabolic process;RNA metabolic process;RNA processing	cell part;intracellular membrane-bounded organelle;intracellular organelle;nucleoplasm;nucleus;organelle	Spliceosome	cwf21;RRM_1;Surp	BERNARD_PPAPDC1B_TARGETS_UP;BROWNE_HCMV_INFECTION_12HR_DN;BRUINS_UVC_RESPONSE_VIA_TP53_GROUP_A;CAIRO_HEPATOBLASTOMA_CLASSES_UP;CHANDRAN_METASTASIS_TOP50_UP;CHANDRAN_METASTASIS_UP;chr3q23;DACOSTA_UV_RESPONSE_VIA_ERCC3_COMMON_DN;DACOSTA_UV_RESPONSE_VIA_ERCC3_DN;DANG_BOUND_BY_MYC;DODD_NASOPHARYNGEAL_CARCINOMA_DN;FARMER_BREAST_CANCER_APOCRINE_VS_LUMINAL;FARMER_BREAST_CANCER_BASAL_VS_LULMINAL;FEVR_CTN…	Acetylation;Alternativesplicing;Coiledcoil;Completeproteome;Nucleus;Phosphoprotein;Referenceproteome;RNA-binding	17S U2 snRNP;Spliceosome	42	42	42	41.1	41.1	41.1	118.23	0	309.17	10655000000	5895600000	4759400000	O15042-2;O15042;O15042-3	O15042-2;O15042;O15042-3	U2 snRNP-associated SURP motif-containing protein	U2SURP	383
0.357834	0.683847	0.100632	-0.0348699	0.678533	-0.104536	0.78566	0.352939	-0.118122	1.04063	0.176497	0.363662	0.670347	0.327623	0.256029	0.78526	-0.286078	0.422718	0.512236	0.352939	0.363662	0.010723	0.471381	biological regulation;biosynthetic process;cellular biosynthetic process;cellular component organization;cellular component organization at cellular level;cellular component organization or biogenesis;cellular component organization or biogenesis at cellular level;cellular macromolecule biosynthetic process;cellular macromolecule metabolic process;cellular metabolic process;cellular nitrogen comp…	binding;catalytic activity;histone methyltransferase activity;histone methyltransferase activity (H3-K4 specific);histone-lysine N-methyltransferase activity;lysine N-methyltransferase activity;methyltransferase activity;N-methyltransferase activity;nucleic acid binding;nucleotide binding;protein methyltransferase activity;protein-lysine N-methyltransferase activity;RNA binding;S-adenosylmethioni…	cell part;chromatin remodeling complex;chromosome;histone methyltransferase complex;intracellular membrane-bounded organelle;intracellular non-membrane-bounded organelle;intracellular organelle;intracellular organelle part;intracellular part;macromolecular complex;membrane-bounded organelle;methyltransferase complex;non-membrane-bounded organelle;nuclear body;nuclear part;nuclear speck;nucleoplas…	biological regulation;biosynthetic process;cellular component organization;cellular metabolic process;cellular nitrogen compound metabolic process;cellular process;chromatin organization;chromosome organization;developmental process;macromolecule metabolic process;metabolic process;nitrogen compound metabolic process;nucleobase-containing compound metabolic process;organelle organization;primary …	cell part;chromatin remodeling complex;chromosome;histone methyltransferase complex;intracellular membrane-bounded organelle;intracellular non-membrane-bounded organelle;intracellular organelle;macromolecular complex;nucleoplasm;nucleus;organelle;protein complex	Lysine degradation	N-SET;RRM_1;SET	ACTTTAT,MIR-142-5P;AFFAR_YY1_TARGETS_DN;BYSTRYKH_HEMATOPOIESIS_STEM_CELL_QTL_TRANS;chr16p11;FLECHNER_PBL_KIDNEY_TRANSPLANT_OK_VS_DONOR_UP;FLECHNER_PBL_KIDNEY_TRANSPLANT_REJECTED_VS_OK_DN;GCM_GSPT1;GCM_NF2;GINESTIER_BREAST_CANCER_ZNF217_AMPLIFIED_DN;GSE14308_TH1_VS_NAIVE_CD4_TCELL_DN;GSE14308_TH17_VS_NATURAL_TREG_DN;GSE14308_TH2_VS_NAIVE_CD4_TCELL_DN;GSE1460_DP_THYMOCYTE_VS_THYMIC_STROMAL_CELL_UP;…	3D-structure;Activator;Chromatinregulator;Chromosome;Completeproteome;Methyltransferase;Nucleus;Phosphoprotein;Polymorphism;Referenceproteome;RNA-binding;S-adenosyl-L-methionine;Transcription;Transcriptionregulation;Transferase	HCF-1 complex;MOF complex;Set1A complex	22	22	22	20.6	20.6	20.6	186.03	0	179.71	661910000	368630000	293270000	O15047	O15047	Histone-lysine N-methyltransferase SETD1A	SETD1A	384
-1.24171	0.00275211	-0.328747	-0.313089	-0.4031	-0.721838	-0.443829	-0.280086	-1.30418	-0.301837	-0.310424	-0.785832	-0.405846	-0.353633	-0.23706	-0.107486	-0.336183	-1.57185	0.745782	-0.4031	-0.336183	0.0669164	0.381796	amine metabolic process;biosynthetic process;carboxylic acid metabolic process;cellular amine metabolic process;cellular amino acid metabolic process;cellular aromatic compound metabolic process;cellular biosynthetic process;cellular ketone metabolic process;cellular metabolic process;cellular nitrogen compound biosynthetic process;cellular nitrogen compound metabolic process;cellular process;'de…	adenyl nucleotide binding;adenyl ribonucleotide binding;ATP binding;binding;carbon-nitrogen ligase activity, with glutamine as amido-N-donor;catalytic activity;cation binding;ion binding;ligase activity;ligase activity, forming carbon-nitrogen bonds;metal ion binding;nucleotide binding;phosphoribosylformylglycinamidine synthase activity;purine nucleotide binding;purine ribonucleoside triphosphate…	cell part;cytoplasm;cytoplasmic part;cytosol;extracellular membrane-bounded organelle;extracellular organelle;extracellular region part;extracellular vesicular exosome;intracellular part;membrane-bounded organelle;membrane-bounded vesicle;organelle;vesicle	amine metabolic process;biosynthetic process;cellular amino acid metabolic process;cellular aromatic compound metabolic process;cellular ketone metabolic process;cellular metabolic process;cellular nitrogen compound metabolic process;cellular process;heterocycle metabolic process;metabolic process;nitrogen compound metabolic process;nucleobase-containing compound metabolic process;nucleobase-cont…	cell part;cytoplasm;cytosol;extracellular organelle;organelle;vesicle	Purine metabolism	AIRS;AIRS_C	BENPORATH_ES_1;BONOME_OVARIAN_CANCER_SURVIVAL_OPTIMAL_DEBULKING;CAIRO_HEPATOBLASTOMA_CLASSES_UP;CHARAFE_BREAST_CANCER_LUMINAL_VS_MESENCHYMAL_DN;chr17p13;DEBIASI_APOPTOSIS_BY_REOVIRUS_INFECTION_DN;DEURIG_T_CELL_PROLYMPHOCYTIC_LEUKEMIA_UP;GCM_DFFA;GNF2_RFC3;GSE10325_LUPUS_BCELL_VS_LUPUS_MYELOID_UP;GSE11924_TFH_VS_TH1_CD4_TCELL_DN;GSE12845_IGD_NEG_BLOOD_VS_DARKZONE_GC_TONSIL_BCELL_DN;GSE12845_IGD_NE…	ATP-binding;Completeproteome;Cytoplasm;Glutamineamidotransferase;Ligase;Magnesium;Metal-binding;Nucleotide-binding;Phosphoprotein;Polymorphism;Purinebiosynthesis;Referenceproteome		31	31	31	40.4	40.4	40.4	144.73	0	323.31	5624500000	3024100000	2600400000	O15067	O15067	Phosphoribosylformylglycinamidine synthase	PFAS	387
0.498614	-0.0849606	-0.11299	0.100066	1.20614	1.42895	0.487226	0.622079	NaN	1.29995	-1.17308	0.331502	NaN	-0.0505585	0.0776327	0.232836	0.760447	0.32833	0.378643	0.49292	0.280583	-0.212337	0.197437			cell part;intracellular organelle part;intracellular part;nuclear part;nucleoplasm;organelle part		cell part;nucleoplasm		Ank;Ank_2	AAAYRNCTG_UNKNOWN;AACTGGA,MIR-145;AAGWWRNYGGC_UNKNOWN;ATGTACA,MIR-493;BCAT_BILD_ET_AL_DN;BROWNE_HCMV_INFECTION_10HR_DN;BROWNE_HCMV_INFECTION_6HR_DN;CAGTATT,MIR-200B,MIR-200C,MIR-429;CHARAFE_BREAST_CANCER_LUMINAL_VS_MESENCHYMAL_DN;CHICAS_RB1_TARGETS_GROWING;chr3p25;CREIGHTON_ENDOCRINE_THERAPY_RESISTANCE_1;CTACCTC,LET-7A,LET-7B,LET-7C,LET-7D,LET-7E,LET-7F,MIR-98,LET-7G,LET-7I;CTACTAG,MIR-325;CTCCAA…	Alternativepromoterusage;Alternativesplicing;ANKrepeat;Completeproteome;Nucleus;Phosphoprotein;Referenceproteome;Repeat	TNF-alpha/NF-kappa B signaling complex (CHUK, BTRC, NFKB2, PPP6C, REL, CUL1, IKBKE, SAPS2, SAPS1, ANKRD28, RELA, SKP1)	7	6	6	12.6	10.8	10.8	112.96	0	31.072	385990000	251990000	134000000	O15084;O15084-4;O15084-1;O15084-2	O15084;O15084-4;O15084-1;O15084-2	Serine/threonine-protein phosphatase 6 regulatory ankyrin repeat subunit A	ANKRD28	389
0.426071	-0.480561	NaN	-1.66784	-0.260999	-0.439542	-0.969374	NaN	-0.275991	-0.320805	-0.636269	-0.754343	0.116627	-1.04145	-0.975828	-0.246399	-0.833655	-0.21725	0.940423	-0.439542	-0.636269	-0.196726	0.215887	cellular macromolecule metabolic process;cellular metabolic process;cellular nitrogen compound metabolic process;cellular process;macromolecule metabolic process;metabolic process;ncRNA metabolic process;ncRNA processing;nitrogen compound metabolic process;nucleic acid metabolic process;nucleobase-containing compound metabolic process;primary metabolic process;RNA metabolic process;RNA processing…		cell part;cytoplasmic part;intracellular membrane-bounded organelle;intracellular organelle;intracellular part;membrane-bounded organelle;mitochondrion;organelle	cellular metabolic process;cellular nitrogen compound metabolic process;cellular process;macromolecule metabolic process;metabolic process;nitrogen compound metabolic process;nucleobase-containing compound metabolic process;primary metabolic process;RNA metabolic process;RNA processing;tRNA metabolic process;tRNA processing	cell part;intracellular membrane-bounded organelle;intracellular organelle;mitochondrion;organelle			ACEVEDO_LIVER_TUMOR_VS_NORMAL_ADJACENT_TISSUE_UP;BENPORATH_NANOG_TARGETS;BENPORATH_SOX2_TARGETS;BROWNE_HCMV_INFECTION_12HR_UP;chr14q13;CREIGHTON_ENDOCRINE_THERAPY_RESISTANCE_1;GSE10325_CD4_TCELL_VS_BCELL_UP;GSE10325_LUPUS_CD4_TCELL_VS_LUPUS_MYELOID_UP;GSE11924_TFH_VS_TH1_CD4_TCELL_DN;GSE11924_TFH_VS_TH2_CD4_TCELL_DN;GSE18791_CTRL_VS_NEWCASTLE_VIRUS_DC_16H_UP;GSE22886_CD8_TCELL_VS_BCELL_NAIVE_UP;G…	Alternativesplicing;Completeproteome;Mitochondrion;Polymorphism;Referenceproteome;Transitpeptide;tRNAprocessing		11	11	11	35.7	35.7	35.7	56.486	0	33.048	325830000	177050000	148770000	O15091-4;O15091-2;O15091;O15091-3	O15091-4;O15091-2;O15091	Mitochondrial ribonuclease P protein 3	KIAA0391	391
NaN	-0.442868	0.787677	0.330662	-0.797072	0.4282	-0.678201	NaN	0.0544626	NaN	-0.354886	-0.0198196	NaN	-0.727096	-0.40307	0.454428	-0.495402	0.430251	0.698927	0.0544626	-0.354886	-0.409348	0.0477856	activation of immune response;activation of innate immune response;anatomical structure development;anatomical structure morphogenesis;antigen receptor-mediated signaling pathway;biological regulation;body fluid secretion;cell differentiation;cell proliferation;cell surface receptor linked signaling pathway;cellular developmental process;cellular macromolecule metabolic process;cellular metabolic…	adenyl nucleotide binding;adenyl ribonucleotide binding;ATP binding;binding;catalytic activity;identical protein binding;IkappaB kinase activity;kinase activity;nucleotide binding;phosphotransferase activity, alcohol group as acceptor;protein binding;protein dimerization activity;protein heterodimerization activity;protein homodimerization activity;protein kinase activity;protein serine/threonine…	CD40 receptor complex;cell part;cytoplasm;cytoplasmic part;cytosol;cytosolic part;IkappaB kinase complex;internal side of plasma membrane;intracellular membrane-bounded organelle;intracellular organelle;intracellular organelle part;intracellular part;macromolecular complex;membrane part;membrane-bounded organelle;nuclear part;nucleoplasm;organelle;organelle part;plasma membrane part;protein compl…	anatomical structure development;anatomical structure morphogenesis;biological regulation;cell differentiation;cell proliferation;cellular metabolic process;cellular process;developmental process;establishment of localization;immune system process;macromolecule metabolic process;macromolecule modification;metabolic process;multicellular organismal process;multi-organism process;muscle contraction…	cell part;cytoplasm;cytosol;intracellular membrane-bounded organelle;intracellular organelle;macromolecular complex;nucleoplasm;organelle;protein complex;receptor complex	Acute myeloid leukemia;Adipocytokine signaling pathway;Apoptosis;B cell receptor signaling pathway;Chagas disease (American trypanosomiasis);Chemokine signaling pathway;Chronic myeloid leukemia;Cytosolic DNA-sensing pathway;Epithelial cell signaling in Helicobacter pylori infection;Hepatitis C;MAPK signaling pathway;Measles;NOD-like receptor signaling pathway;Osteoclast differentiation;Pancreatic…	IKKbetaNEMObind;Pkinase	AATGTGA,MIR-23A,MIR-23B;AMUNDSON_GENOTOXIC_SIGNATURE;ANATOMICAL_STRUCTURE_DEVELOPMENT;ANATOMICAL_STRUCTURE_MORPHOGENESIS;BIOCARTA_41BB_PATHWAY;BIOCARTA_AKT_PATHWAY;BIOCARTA_CD40_PATHWAY;BIOCARTA_DEATH_PATHWAY;BIOCARTA_HIVNEF_PATHWAY;BIOCARTA_IL1R_PATHWAY;BIOCARTA_KERATINOCYTE_PATHWAY;BIOCARTA_MAPK_PATHWAY;BIOCARTA_NFKB_PATHWAY;BIOCARTA_NTHI_PATHWAY;BIOCARTA_RACCYCD_PATHWAY;BIOCARTA_RAS_PATHWAY;BI…	3D-structure;Acetylation;ATP-binding;Completeproteome;Cytoplasm;Directproteinsequencing;Kinase;Nucleotide-binding;Nucleus;Phosphoprotein;Polymorphism;Referenceproteome;Serine/threonine-proteinkinase;Transferase	BCL10-CHUK-BCL10-IKBKB complex;CASP8-CHUK-IKBKB-MALT1-BCL10 complex;CHUK-ERC1-IKBKB-IKBKG;CHUK-IKBKB-IKBKG complex;CHUK-IKBKB-MAP3K14 complex;CHUK-IQGAP2-AKAP8L-RELA-TNIP2 complex;CHUK-NFKB2-REL-IKBKG-SPAG9-NFKB1-NFKBIE-COPB2-TNIP1-NFKBIA-RELA-TNIP2 complex;I-kappa-B kinase (IKK) complex;IkappaB kinase complex (IKBKB, CHUK, IKBKAP, NFKBIA, RELA, MAP3K14);IKBKG-CHUK complex;IKKA-IKKB complex;IKK-a…	9	8	8	16.9	15.8	15.8	84.639	0	18.807	373150000	231790000	141360000	O15111	O15111	Inhibitor of nuclear factor kappa-B kinase subunit alpha	CHUK	392
-1.01751	-0.508103	0.0534669	-0.0279236	-0.585364	-0.573612	-0.173365	-0.351659	-1.07928	-0.210558	-0.477233	-0.375873	NaN	-0.360726	-0.194577	-0.211277	-0.253867	-1.09995	0.662692	-0.508103	-0.307296	0.200807	0.198686	catabolic process;cellular catabolic process;cellular macromolecule catabolic process;cellular macromolecule metabolic process;cellular metabolic process;cellular nitrogen compound metabolic process;cellular process;deadenylation-dependent decapping of nuclear-transcribed mRNA;exonucleolytic nuclear-transcribed mRNA catabolic process involved in deadenylation-dependent decay;gene expression;histo…	binding;nucleic acid binding;RNA binding;RNA cap binding	cell part;cytoplasm;cytoplasmic mRNA processing body;cytoplasmic part;cytosol;intracellular membrane-bounded organelle;intracellular non-membrane-bounded organelle;intracellular organelle;intracellular part;macromolecular complex;membrane-bounded organelle;non-membrane-bounded organelle;nucleus;organelle;ribonucleoprotein complex;RNA granule	catabolic process;cellular metabolic process;cellular nitrogen compound metabolic process;cellular process;macromolecule metabolic process;metabolic process;mRNA metabolic process;mRNA processing;nitrogen compound metabolic process;nucleobase-containing compound metabolic process;primary metabolic process;RNA catabolic process;RNA metabolic process;RNA processing;RNA splicing	cell part;cytoplasm;cytosol;intracellular membrane-bounded organelle;intracellular non-membrane-bounded organelle;intracellular organelle;macromolecular complex;nucleus;organelle;ribonucleoprotein complex	RNA degradation	LSM	ACEVEDO_LIVER_CANCER_UP;AGUIRRE_PANCREATIC_CANCER_COPY_NUMBER_UP;BAE_BRCA1_TARGETS_UP;BENPORATH_MYC_MAX_TARGETS;BIOPOLYMER_METABOLIC_PROCESS;BRUINS_UVC_RESPONSE_EARLY_LATE;CACTGTG,MIR-128A,MIR-128B;chr8p11;CTGCAGY_UNKNOWN;CTTTGT_V$LEF1_Q2;DANG_BOUND_BY_MYC;DIAZ_CHRONIC_MEYLOGENOUS_LEUKEMIA_UP;DING_LUNG_CANCER_EXPRESSION_BY_COPY_NUMBER;GATTGGY_V$NFY_Q6_01;GGGCGGR_V$SP1_Q6;GSE14308_TH2_VS_TH1_UP;GS…	Completeproteome;mRNAprocessing;mRNAsplicing;Nucleus;Referenceproteome;Ribonucleoprotein;RNA-binding	LSm1-7 complex	4	4	4	51.1	51.1	51.1	15.179	0	31.519	941930000	514400000	427530000	O15116	O15116	U6 snRNA-associated Sm-like protein LSm1	LSM1	393
1.97959	1.68132	1.79185	1.64625	1.17741	2.56213	2.98653	4.06337	0.757363	2.28435	2.10454	2.59432	2.01443	2.90557	1.97798	2.18639	3.35967	1.79987	0.45716	1.79185	2.18639	0.394538	0.0509502	activation of immune response;antigen receptor-mediated signaling pathway;biological regulation;cell surface receptor linked signaling pathway;cellular macromolecule metabolic process;cellular metabolic process;cellular process;cellular protein metabolic process;cellular response to stimulus;establishment of localization;establishment of localization in cell;establishment of protein localization;…	binding;protein binding;receptor binding	actin cytoskeleton;cell part;cytoplasmic part;cytoskeleton;cytosol;intracellular membrane-bounded organelle;intracellular non-membrane-bounded organelle;intracellular organelle;intracellular part;membrane-bounded organelle;non-membrane-bounded organelle;nucleus;organelle	biological regulation;cellular metabolic process;cellular process;establishment of localization;immune system process;macromolecule metabolic process;macromolecule modification;metabolic process;nuclear transport;nucleocytoplasmic transport;phosphorus metabolic process;primary metabolic process;protein metabolic process;protein modification process;protein phosphorylation;protein targeting;protei…	cell part;cytoskeleton;cytosol;intracellular membrane-bounded organelle;intracellular non-membrane-bounded organelle;intracellular organelle;nucleus;organelle		hSH3;SH3_2	ACEVEDO_LIVER_CANCER_WITH_H3K9ME3_UP;ACEVEDO_METHYLATED_IN_LIVER_CANCER_DN;ACTIN_CYTOSKELETON;AFFAR_YY1_TARGETS_UP;BIOPOLYMER_METABOLIC_PROCESS;BIOPOLYMER_MODIFICATION;BOYLAN_MULTIPLE_MYELOMA_C_D_DN;BOYLAN_MULTIPLE_MYELOMA_PCA1_UP;BROWNE_HCMV_INFECTION_2HR_UP;CELLULAR_LOCALIZATION;CELLULAR_MACROMOLECULE_METABOLIC_PROCESS;CELLULAR_PROTEIN_METABOLIC_PROCESS;CHIARETTI_T_ALL_REFRACTORY_TO_THERAPY;chr…	3D-structure;Acetylation;Alternativesplicing;Coiledcoil;Completeproteome;Cytoplasm;Directproteinsequencing;Nucleus;Phosphoprotein;Polymorphism;Referenceproteome;SH3domain	FYB-CARMA1-BCL-10-MALT1 complex	20	20	20	26.4	26.4	26.4	90.605	0	71.861	1017400000	908400000	109030000	O15117-2;O15117-3;O15117;REV__P15498-2;REV__P15498	O15117-2;O15117-3;O15117	FYN-binding protein	FYB	394
0.32571	NaN	-0.620167	-0.618355	-0.440665	-0.352163	-0.747014	-0.468987	0.724002	-1.0716	-0.227399	-0.306354	-0.744806	-1.062	-0.436108	-0.350463	-0.0333664	0.113904	0.442619	-0.454826	-0.350463	0.104363	0.325149	adult behavior;adult locomotory behavior;adult walking behavior;alcohol metabolic process;autophagy;behavior;bile acid metabolic process;biological regulation;carbohydrate metabolic process;carboxylic acid metabolic process;catabolic process;cellular carbohydrate metabolic process;cellular catabolic process;cellular component organization;cellular component organization or biogenesis;cellular ket…	binding;cholesterol binding;hedgehog receptor activity;lipid binding;lipid transporter activity;molecular transducer activity;receptor activity;signal transducer activity;signaling receptor activity;steroid binding;sterol binding;sterol transporter activity;substrate-specific transporter activity;transmembrane signaling receptor activity;transporter activity	cell part;cytoplasmic part;endoplasmic reticulum;endosomal part;endosome membrane;envelope;extracellular membrane-bounded organelle;extracellular organelle;extracellular region;extracellular region part;extracellular vesicular exosome;Golgi apparatus;integral to membrane;integral to plasma membrane;intracellular membrane-bounded organelle;intracellular organelle;intracellular organelle part;intra…	alcohol metabolic process;autophagy;behavior;biological regulation;carbohydrate metabolic process;catabolic process;cellular component organization;cellular ketone metabolic process;cellular membrane organization;cellular metabolic process;cellular process;endocytosis;establishment of localization;homeostatic process;interspecies interaction between organisms;lipid metabolic process;lipid transpo…	cell part;endoplasmic reticulum;extracellular organelle;extracellular region;Golgi apparatus;intracellular membrane-bounded organelle;intracellular organelle;lysosome;membrane;nuclear envelope;organelle;vacuole;vesicle	Lysosome	Patched	ACEVEDO_LIVER_CANCER_UP;ACEVEDO_LIVER_TUMOR_VS_NORMAL_ADJACENT_TISSUE_UP;AGUIRRE_PANCREATIC_CANCER_COPY_NUMBER_UP;ASTON_MAJOR_DEPRESSIVE_DISORDER_DN;BILE_ACID_METABOLIC_PROCESS;BLALOCK_ALZHEIMERS_DISEASE_UP;BLUM_RESPONSE_TO_SALIRASIB_UP;BOYAULT_LIVER_CANCER_SUBCLASS_G23_UP;BROWN_MYELOID_CELL_DEVELOPMENT_UP;BRUINS_UVC_RESPONSE_LATE;BUYTAERT_PHOTODYNAMIC_THERAPY_STRESS_UP;CAGTATT,MIR-200B,MIR-200C,…	3D-structure;Alternativesplicing;Cholesterolmetabolism;Completeproteome;Diseasemutation;Disulfidebond;Endosome;Glycoprotein;Lipidmetabolism;Lysosome;Membrane;Niemann-Pickdisease;Polymorphism;Referenceproteome;Signal;Steroidmetabolism;Sterolmetabolism;Transmembrane;Transmembranehelix		9	9	9	8.5	8.5	8.5	142.17	0	20.483	487600000	249420000	238180000	O15118;O15118-2	O15118;O15118-2	Niemann-Pick C1 protein	NPC1	395
NaN	-0.180727	-0.884616	-0.616111	0.0544159	0.0696501	NaN	NaN	0.135365	-0.794408	-0.621669	-0.213612	NaN	NaN	0.0346079	-0.468202	NaN	0.203971	0.761206	-0.0631557	-0.340907	-0.277752	0.130991	acylglycerol biosynthetic process;acylglycerol metabolic process;anatomical structure development;biological regulation;biosynthetic process;carboxylic acid biosynthetic process;carboxylic acid metabolic process;CDP-diacylglycerol biosynthetic process;CDP-diacylglycerol metabolic process;cellular biosynthetic process;cellular ketone metabolic process;cellular lipid metabolic process;cellular meta…	1-acylglycerol-3-phosphate O-acyltransferase activity;acylglycerol O-acyltransferase activity;catalytic activity;O-acyltransferase activity;transferase activity;transferase activity, transferring acyl groups;transferase activity, transferring acyl groups other than amino-acyl groups	cell part;cytoplasmic part;endoplasmic reticulum;endoplasmic reticulum membrane;endoplasmic reticulum part;integral to membrane;intracellular membrane-bounded organelle;intracellular organelle;intracellular organelle part;intracellular part;intrinsic to membrane;membrane;membrane part;membrane-bounded organelle;organelle;organelle membrane;organelle part	anatomical structure development;biological regulation;biosynthetic process;cellular ketone metabolic process;cellular lipid metabolic process;cellular metabolic process;cellular process;developmental process;glycerol ether metabolic process;lipid metabolic process;metabolic process;organic acid metabolic process;primary metabolic process;small molecule metabolic process	cell part;endoplasmic reticulum;intracellular membrane-bounded organelle;intracellular organelle;membrane;organelle	Fat digestion and absorption;Glycerolipid metabolism;Glycerophospholipid metabolism	Acyltransferase	ACEVEDO_LIVER_CANCER_DN;ACEVEDO_NORMAL_TISSUE_ADJACENT_TO_LIVER_TUMOR_DN;BERTUCCI_MEDULLARY_VS_DUCTAL_BREAST_CANCER_DN;BIOSYNTHETIC_PROCESS;BLALOCK_ALZHEIMERS_DISEASE_UP;BOYAULT_LIVER_CANCER_SUBCLASS_G56_DN;CAIRO_HEPATOBLASTOMA_DN;CARBOXYLIC_ACID_METABOLIC_PROCESS;CELLULAR_BIOSYNTHETIC_PROCESS;CELLULAR_LIPID_METABOLIC_PROCESS;chr9q34;CYTOPLASM;CYTOPLASMIC_PART;DACOSTA_UV_RESPONSE_VIA_ERCC3_UP;DOD…	Acyltransferase;Alternativesplicing;Completeproteome;Congenitalgeneralizedlipodystrophy;Diabetesmellitus;Diseasemutation;Endoplasmicreticulum;Lipidbiosynthesis;Lipidmetabolism;Membrane;Phospholipidbiosynthesis;Phospholipidmetabolism;Referenceproteome;Signal;Transferase;Transmembrane;Transmembranehelix		5	5	5	18	18	18	30.914	0	10.232	320420000	190760000	129660000	O15120;O15120-2	O15120;O15120-2	1-acyl-sn-glycerol-3-phosphate acyltransferase beta	AGPAT2	396
-0.394198	-1.30793	-0.799401	-0.938418	-0.749138	-0.558691	NaN	-0.767663	NaN	-1.57714	-1.15885	-0.483158	NaN	NaN	-1.51079	NaN	NaN	-0.0922535	0.595066	-0.767663	-1.15885	-0.391182	0.0557509	biosynthetic process;carboxylic acid biosynthetic process;carboxylic acid metabolic process;cellular biosynthetic process;cellular ketone metabolic process;cellular lipid metabolic process;cellular metabolic process;cellular process;fatty acid biosynthetic process;fatty acid metabolic process;lipid biosynthetic process;lipid metabolic process;membrane lipid biosynthetic process;membrane lipid met…	catalytic activity;electron carrier activity;oxidoreductase activity;oxidoreductase activity, acting on paired donors, with incorporation or reduction of molecular oxygen;sphingolipid delta-4 desaturase activity	cell part;cytoplasmic part;endoplasmic reticulum;endoplasmic reticulum membrane;endoplasmic reticulum part;integral to membrane;integral to plasma membrane;intracellular membrane-bounded organelle;intracellular organelle;intracellular organelle part;intracellular part;intrinsic to membrane;intrinsic to plasma membrane;membrane;membrane part;membrane-bounded organelle;mitochondrion;organelle;organ…	biosynthetic process;cellular ketone metabolic process;cellular lipid metabolic process;cellular metabolic process;cellular process;lipid metabolic process;metabolic process;organic acid metabolic process;primary metabolic process;small molecule metabolic process	cell part;endoplasmic reticulum;intracellular membrane-bounded organelle;intracellular organelle;membrane;mitochondrion;organelle	Sphingolipid metabolism	FA_desaturase;Lipid_DES	ACEVEDO_LIVER_TUMOR_VS_NORMAL_ADJACENT_TISSUE_UP;AIYAR_COBRA1_TARGETS_UP;BENPORATH_MYC_MAX_TARGETS;BIOSYNTHETIC_PROCESS;BLALOCK_ALZHEIMERS_DISEASE_DN;BOYAULT_LIVER_CANCER_SUBCLASS_G2;BROWN_MYELOID_CELL_DEVELOPMENT_UP;BRUINS_UVC_RESPONSE_VIA_TP53_GROUP_A;CARBOXYLIC_ACID_METABOLIC_PROCESS;CELL_FRACTION;CELLULAR_BIOSYNTHETIC_PROCESS;CELLULAR_LIPID_METABOLIC_PROCESS;CHANG_IMMORTALIZED_BY_HPV31_DN;chr…	Completeproteome;Endoplasmicreticulum;Fattyacidbiosynthesis;Fattyacidmetabolism;Lipidbiosynthesis;Lipidmetabolism;Lipoprotein;Membrane;Mitochondrion;Myristate;Oxidoreductase;Phosphoprotein;Referenceproteome;Transmembrane;Transmembranehelix		5	5	5	16.1	16.1	16.1	37.866	0	27.592	361130000	171510000	189610000	O15121	O15121	Sphingolipid delta(4)-desaturase DES1	DEGS1	397
0.896343	0.151341	0.457751	0.270048	0.967388	0.0433893	0.0824019	-0.00143217	0.42536	0.54739	-0.0448356	1.06904	0.198124	0.437603	0.254836	-0.0849991	0.135226	0.948651	0.919044	0.270048	0.254836	-0.0152116	0.486267	cellular component organization;cellular component organization or biogenesis;cellular membrane organization;cellular process;endocytosis;establishment of localization;establishment of localization in cell;establishment of protein localization;exocytosis;Golgi vesicle transport;intracellular transport;membrane invagination;membrane organization;post-Golgi vesicle-mediated transport;protein transp…		cell part;clathrin coated vesicle membrane;clathrin-coated vesicle;coated vesicle;coated vesicle membrane;cytoplasmic membrane-bounded vesicle;cytoplasmic part;cytoplasmic vesicle;cytoplasmic vesicle membrane;cytoplasmic vesicle part;endosomal part;endosome membrane;Golgi apparatus part;integral to membrane;intracellular membrane-bounded organelle;intracellular organelle;intracellular organelle p…	cellular component organization;cellular membrane organization;cellular process;endocytosis;establishment of localization;exocytosis;Golgi vesicle transport;membrane invagination;membrane organization;protein transport;secretion;transport;vesicle-mediated transport	cell part;cytoplasmic membrane-bounded vesicle;intracellular membrane-bounded organelle;intracellular organelle;membrane;organelle;vesicle		SCAMP	ACTGAAA,MIR-30A-3P,MIR-30E-3P;ATCATGA,MIR-433;BASAKI_YBX1_TARGETS_DN;BEGUM_TARGETS_OF_PAX3_FOXO1_FUSION_UP;BERNARD_PPAPDC1B_TARGETS_DN;BLALOCK_ALZHEIMERS_DISEASE_DN;BONOME_OVARIAN_CANCER_SURVIVAL_SUBOPTIMAL_DEBULKING;BOYLAN_MULTIPLE_MYELOMA_C_D_DN;CAGTATT,MIR-200B,MIR-200C,MIR-429;CELLULAR_LOCALIZATION;chr5q13;DACOSTA_UV_RESPONSE_VIA_ERCC3_DN;DANG_REGULATED_BY_MYC_DN;DAVICIONI_MOLECULAR_ARMS_VS_E…	Acetylation;Alternativesplicing;Completeproteome;Endosome;Golgiapparatus;Membrane;Proteintransport;Referenceproteome;Transmembrane;Transmembranehelix;Transport	SCAMP1-SCAMP2 complex;SCAMP1-SCAMP2-SCAMP3 complex	9	9	9	39.9	39.9	39.9	37.92	0	115.45	2738200000	1023900000	1714300000	O15126;O15126-2	O15126;O15126-2	Secretory carrier-associated membrane protein 1	SCAMP1	398
0.309055	0.38566	0.330118	0.565729	0.0120972	0.541137	-0.260156	0.33582	0.901569	-0.407792	0.607707	0.659148	0.135797	-0.0414535	0.383641	0.15639	0.070955	0.729674	0.588389	0.33582	0.15639	-0.179429	0.237451	cellular process;establishment of localization;establishment of localization in cell;establishment of protein localization;Golgi vesicle transport;intracellular transport;post-Golgi vesicle-mediated transport;protein transport;transport;vesicle-mediated transport		cell part;cytoplasmic membrane-bounded vesicle;cytoplasmic part;cytoplasmic vesicle;endosomal part;endosome membrane;extracellular membrane-bounded organelle;extracellular organelle;extracellular region part;extracellular vesicular exosome;Golgi apparatus;Golgi apparatus part;Golgi membrane;integral to membrane;intracellular membrane-bounded organelle;intracellular organelle;intracellular organel…	cellular process;establishment of localization;Golgi vesicle transport;protein transport;transport;vesicle-mediated transport	cell part;cytoplasmic membrane-bounded vesicle;extracellular organelle;Golgi apparatus;intracellular membrane-bounded organelle;intracellular organelle;membrane;nucleoplasm;organelle;vesicle		SCAMP	AMUNDSON_GENOTOXIC_SIGNATURE;BLALOCK_ALZHEIMERS_DISEASE_UP;BLUM_RESPONSE_TO_SALIRASIB_UP;CAGGTG_V$E12_Q6;CELLULAR_LOCALIZATION;CHARAFE_BREAST_CANCER_LUMINAL_VS_MESENCHYMAL_UP;chr15q23;COLDREN_GEFITINIB_RESISTANCE_DN;DODD_NASOPHARYNGEAL_CARCINOMA_UP;ESTABLISHMENT_OF_CELLULAR_LOCALIZATION;ESTABLISHMENT_OF_LOCALIZATION;GCM_DDX11;GCM_ING1;GCM_NF2;GCM_USP6;GOBERT_OLIGODENDROCYTE_DIFFERENTIATION_DN;GOL…	Completeproteome;Endosome;Golgiapparatus;Membrane;Phosphoprotein;Proteintransport;Referenceproteome;Transmembrane;Transmembranehelix;Transport	SCAMP1-SCAMP2 complex;SCAMP1-SCAMP2-SCAMP3 complex	5	5	5	17.9	17.9	17.9	36.648	0	241.84	4563200000	3088900000	1474300000	O15127	O15127	Secretory carrier-associated membrane protein 2	SCAMP2	399
-0.684537	-0.0111217	0.824615	0.715567	-0.847306	-0.466751	0.346925	0.882579	-0.520037	-0.289537	0.428995	0.289952	-0.221516	0.931034	0.380143	0.0215994	-0.0506136	-0.572377	0.787561	-0.0111217	0.0215994	0.0327211	0.435876	actin cytoskeleton organization;actin filament organization;actin filament-based process;actin nucleation;Arp2/3 complex-mediated actin nucleation;biological regulation;cellular component movement;cellular component organization;cellular component organization at cellular level;cellular component organization or biogenesis;cellular component organization or biogenesis at cellular level;cellular p…	structural constituent of cytoskeleton;structural molecule activity	actin cytoskeleton;adherens junction;anchoring junction;Arp2/3 protein complex;cell junction;cell part;cell-substrate adherens junction;cell-substrate junction;cytoplasm;cytoskeletal part;cytoskeleton;extracellular membrane-bounded organelle;extracellular organelle;extracellular region part;extracellular vesicular exosome;focal adhesion;intracellular non-membrane-bounded organelle;intracellular o…	biological regulation;cellular component movement;cellular component organization;cellular process;cytoskeleton organization;organelle organization;regulation of organelle organization	cell part;cytoplasm;cytoskeleton;extracellular organelle;intracellular non-membrane-bounded organelle;intracellular organelle;macromolecular complex;organelle;protein complex;vesicle	Bacterial invasion of epithelial cells;Fc gamma R-mediated phagocytosis;Pathogenic Escherichia coli infection;Regulation of actin cytoskeleton;Shigellosis	WD40	ACEVEDO_FGFR1_TARGETS_IN_PROSTATE_CANCER_MODEL_UP;ACTIN_CYTOSKELETON;AGUIRRE_PANCREATIC_CANCER_COPY_NUMBER_UP;BIOCARTA_ACTINY_PATHWAY;BIOCARTA_CDC42RAC_PATHWAY;BIOCARTA_MPR_PATHWAY;BIOCARTA_RHO_PATHWAY;BIOCARTA_SALMONELLA_PATHWAY;BLALOCK_ALZHEIMERS_DISEASE_INCIPIENT_UP;BLALOCK_ALZHEIMERS_DISEASE_UP;CHEN_METABOLIC_SYNDROM_NETWORK;chr7q;CYTOSKELETAL_PART;CYTOSKELETON;GNF2_CASP1;GNF2_FGR;GNF2_MYD88;…	Acetylation;Actin-binding;Completeproteome;Cytoplasm;Cytoskeleton;Directproteinsequencing;Polymorphism;Referenceproteome;Repeat;WDrepeat	Arp2/3 protein complex	25	25	24	73.4	73.4	67.2	40.949	0	323.31	35384000000	22707000000	12677000000	O15143	O15143	Actin-related protein 2/3 complex subunit 1B	ARPC1B	401
-0.567545	0.0844256	0.836147	0.741659	-0.928075	0.409097	0.413998	0.974032	-0.240469	-0.106749	0.901023	0.221396	-0.0279169	0.912144	0.643674	0.127788	1.03323	-0.347192	0.522119	0.409097	0.221396	-0.187701	0.226995	actin cytoskeleton organization;actin filament organization;actin filament-based process;actin nucleation;Arp2/3 complex-mediated actin nucleation;axon guidance;biological regulation;cell surface receptor linked signaling pathway;cellular component movement;cellular component organization;cellular component organization at cellular level;cellular component organization or biogenesis;cellular comp…	structural constituent of cytoskeleton;structural molecule activity	actin cytoskeleton;adherens junction;anchoring junction;Arp2/3 protein complex;cell junction;cell leading edge;cell part;cell projection;cell-substrate adherens junction;cell-substrate junction;cytoplasm;cytoplasmic part;cytoskeletal part;cytoskeleton;cytosol;endosome;extracellular membrane-bounded organelle;extracellular organelle;extracellular region part;extracellular vesicular exosome;focal a…	biological regulation;cellular component movement;cellular component organization;cellular process;cytoskeleton organization;immune system process;locomotion;organelle organization;regulation of organelle organization;response to chemical stimulus;response to external stimulus;response to stimulus;response to stress;signal transduction	cell leading edge;cell part;cell projection;cytoplasm;cytoskeleton;cytosol;endosome;extracellular organelle;Golgi apparatus;intracellular membrane-bounded organelle;intracellular non-membrane-bounded organelle;intracellular organelle;macromolecular complex;membrane;neuron projection;organelle;plasma membrane;protein complex;synapse;vesicle	Bacterial invasion of epithelial cells;Fc gamma R-mediated phagocytosis;Pathogenic Escherichia coli infection;Regulation of actin cytoskeleton;Shigellosis	P34-Arc	AAAYRNCTG_UNKNOWN;AACTTT_UNKNOWN;ACTIN_CYTOSKELETON;BANDRES_RESPONSE_TO_CARMUSTIN_MGMT_24HR_DN;BANDRES_RESPONSE_TO_CARMUSTIN_MGMT_48HR_DN;BCAT_BILD_ET_AL_DN;BIOCARTA_ACTINY_PATHWAY;BIOCARTA_CDC42RAC_PATHWAY;BIOCARTA_MPR_PATHWAY;BIOCARTA_RHO_PATHWAY;BIOCARTA_SALMONELLA_PATHWAY;BLALOCK_ALZHEIMERS_DISEASE_DN;BONOME_OVARIAN_CANCER_SURVIVAL_OPTIMAL_DEBULKING;CHARAFE_BREAST_CANCER_LUMINAL_VS_BASAL_DN;C…	Acetylation;Actin-binding;Celljunction;Cellprojection;Completeproteome;Cytoplasm;Cytoskeleton;Directproteinsequencing;Referenceproteome;Synapse;Synaptosome	Arp2/3 protein complex	29	29	29	81	81	81	34.333	0	323.31	30353000000	20217000000	10136000000	O15144	O15144	Actin-related protein 2/3 complex subunit 2	ARPC2	402
-0.624369	0.082981	0.884591	0.752916	-0.861708	0.0841922	0.30952	1.01375	-0.385356	-0.0791906	0.742475	0.248705	-0.0502474	0.884534	0.616965	0.168054	0.666072	-0.488088	0.560247	0.0841922	0.248705	0.164513	0.242452	actin cytoskeleton organization;actin filament organization;actin filament-based process;actin nucleation;Arp2/3 complex-mediated actin nucleation;axon guidance;biological regulation;cell surface receptor linked signaling pathway;cellular component movement;cellular component organization;cellular component organization at cellular level;cellular component organization or biogenesis;cellular comp…	structural constituent of cytoskeleton;structural molecule activity	actin cytoskeleton;adherens junction;anchoring junction;Arp2/3 protein complex;cell junction;cell part;cell projection;cell-substrate adherens junction;cell-substrate junction;cytoplasmic part;cytoskeletal part;cytoskeleton;cytosol;extracellular membrane-bounded organelle;extracellular organelle;extracellular region part;extracellular vesicular exosome;focal adhesion;intracellular non-membrane-bo…	biological regulation;cellular component movement;cellular component organization;cellular process;cytoskeleton organization;immune system process;locomotion;organelle organization;regulation of organelle organization;response to chemical stimulus;response to external stimulus;response to stimulus;response to stress;signal transduction	cell part;cell projection;cytoskeleton;cytosol;extracellular organelle;intracellular non-membrane-bounded organelle;intracellular organelle;macromolecular complex;membrane;organelle;protein complex;vesicle	Bacterial invasion of epithelial cells;Fc gamma R-mediated phagocytosis;Pathogenic Escherichia coli infection;Regulation of actin cytoskeleton;Shigellosis	P21-Arc	ACTIN_CYTOSKELETON;BERNARD_PPAPDC1B_TARGETS_UP;BIOCARTA_ACTINY_PATHWAY;BIOCARTA_CDC42RAC_PATHWAY;BIOCARTA_MPR_PATHWAY;BIOCARTA_RHO_PATHWAY;BIOCARTA_SALMONELLA_PATHWAY;BLALOCK_ALZHEIMERS_DISEASE_DN;chr12q24;CRX_NRL_DN.V1_DN;CYTOSKELETAL_PART;CYTOSKELETON;DAIRKEE_TERT_TARGETS_UP;DIAZ_CHRONIC_MEYLOGENOUS_LEUKEMIA_UP;GNF2_BNIP2;GNF2_CASP4;GNF2_LYN;GNF2_MYD88;GNF2_PAK2;GNF2_PTPN6;GNF2_SELL;GNF2_STAT6;…	Acetylation;Actin-binding;Cellprojection;Completeproteome;Cytoplasm;Cytoskeleton;Directproteinsequencing;Phosphoprotein;Referenceproteome	Arp2/3 protein complex	10	10	10	54.5	54.5	54.5	20.546	0	79.442	13795000000	9391900000	4403300000	O15145	O15145	Actin-related protein 2/3 complex subunit 3	ARPC3	403
-0.205842	-0.387111	0.412939	0.528373	-0.83455	0.299725	-1.39762	0.0976766	0.112762	-1.52381	0.522926	0.118274	-0.708305	0.16452	0.801655	-1.00881	0.096157	0.273242	0.971171	0.0976766	0.118274	0.020597	0.455399	anatomical structure development;biological regulation;biosynthetic process;cell differentiation;cellular biosynthetic process;cellular developmental process;cellular macromolecule biosynthetic process;cellular macromolecule metabolic process;cellular metabolic process;cellular nitrogen compound metabolic process;cellular process;developmental process;ectoderm development;macromolecule biosynthet…	binding;cation binding;DNA binding;ion binding;metal ion binding;nucleic acid binding;regulatory region DNA binding;regulatory region nucleic acid binding;RNA polymerase II regulatory region DNA binding;RNA polymerase II regulatory region sequence-specific DNA binding;sequence-specific DNA binding;transcription regulatory region DNA binding;transcription regulatory region sequence-specific DNA bi…	cell part;intracellular membrane-bounded organelle;intracellular organelle;intracellular organelle part;intracellular part;membrane-bounded organelle;nuclear part;nucleoplasm;nucleus;organelle;organelle part	anatomical structure development;biological regulation;biosynthetic process;cell differentiation;cellular metabolic process;cellular nitrogen compound metabolic process;cellular process;developmental process;macromolecule metabolic process;metabolic process;multicellular organismal development;multicellular organismal process;nitrogen compound metabolic process;nucleobase-containing compound meta…	cell part;intracellular membrane-bounded organelle;intracellular organelle;nucleoplasm;nucleus;organelle		BTB	AACTTT_UNKNOWN;ANATOMICAL_STRUCTURE_DEVELOPMENT;CAGGTG_V$E12_Q6;CCCAGAG,MIR-326;CHARAFE_BREAST_CANCER_LUMINAL_VS_MESENCHYMAL_UP;chr1q21;ECTODERM_DEVELOPMENT;GGGAGGRR_V$MAZ_Q6;GINESTIER_BREAST_CANCER_ZNF217_AMPLIFIED_DN;GRAESSMANN_APOPTOSIS_BY_DOXORUBICIN_DN;GSE17580_UNINFECTED_VS_S_MANSONI_INF_TEFF_UP;GSE17721_0.5H_VS_12H_PAM3CSK4_BMDM_DN;GSE17721_LPS_VS_CPG_2H_BMDM_DN;GSE17721_LPS_VS_POLYIC_2H_B…	Alternativesplicing;Completeproteome;Developmentalprotein;Differentiation;DNA-binding;Metal-binding;Nucleus;Phosphoprotein;Referenceproteome;Repeat;Repressor;Transcription;Transcriptionregulation;Zinc;Zinc-finger		6	6	6	18.2	18.2	18.2	58.026	0	49.487	325400000	197200000	128200000	O15156;O15156-2	O15156;O15156-2	Zinc finger and BTB domain-containing protein 7B	ZBTB7B	405
0.166657	-0.394309	-1.27931	-1.37536	-0.00969198	-0.855745	-0.260286	-0.706473	-0.80864	0.199049	-1.13958	-0.576046	0.125111	-0.658116	-1.39222	-0.447826	-1.10832	-0.348576	0.939765	-0.706473	-0.576046	0.130427	0.287893	biological regulation;biosynthetic process;cellular biosynthetic process;cellular macromolecule biosynthetic process;cellular macromolecule metabolic process;cellular metabolic process;cellular nitrogen compound metabolic process;cellular process;defense response;gene expression;immune response;immune system process;innate immune response;macromolecule biosynthetic process;macromolecule metabolic…	binding;catalytic activity;DNA binding;DNA-directed RNA polymerase activity;nucleic acid binding;nucleotidyltransferase activity;RNA polymerase activity;transferase activity;transferase activity, transferring phosphorus-containing groups	cell part;cytoplasmic part;cytosol;DNA-directed RNA polymerase complex;DNA-directed RNA polymerase I complex;DNA-directed RNA polymerase III complex;intracellular organelle part;intracellular part;macromolecular complex;nuclear DNA-directed RNA polymerase complex;nuclear part;nucleolar part;nucleoplasm;nucleoplasm part;organelle part;protein complex;RNA polymerase complex	biological regulation;biosynthetic process;cellular metabolic process;cellular nitrogen compound metabolic process;cellular process;immune system process;macromolecule metabolic process;metabolic process;nitrogen compound metabolic process;nucleobase-containing compound metabolic process;primary metabolic process;regulation of gene expression, epigenetic;response to stimulus;response to stress;RN…	cell part;cytosol;macromolecular complex;nucleoplasm;protein complex;RNA polymerase complex	Cytosolic DNA-sensing pathway;Purine metabolism;Pyrimidine metabolism;RNA polymerase	RNA_pol_A_bac;RNA_pol_L	AMUNDSON_RESPONSE_TO_ARSENITE;BENPORATH_MYC_MAX_TARGETS;BILANGES_RAPAMYCIN_SENSITIVE_VIA_TSC1_AND_TSC2;BIOCARTA_ARF_PATHWAY;BIOPOLYMER_METABOLIC_PROCESS;BLALOCK_ALZHEIMERS_DISEASE_UP;BYSTRYKH_HEMATOPOIESIS_STEM_CELL_QTL_TRANS;CAIRO_HEPATOBLASTOMA_CLASSES_UP;chr6p21;DIAZ_CHRONIC_MEYLOGENOUS_LEUKEMIA_UP;DNA_DIRECTED_RNA_POLYMERASE_COMPLEX;FLECHNER_PBL_KIDNEY_TRANSPLANT_REJECTED_VS_OK_UP;GARY_CD5_TA…	Acetylation;Alternativesplicing;Completeproteome;Directproteinsequencing;Diseasemutation;DNA-directedRNApolymerase;Nucleus;Referenceproteome;Transcription		13	13	13	58.1	58.1	58.1	39.249	0	108.77	3262800000	1432600000	1830200000	O15160;O15160-2	O15160;O15160-2	DNA-directed RNA polymerases I and III subunit RPAC1	POLR1C	406
0.110739	0.460314	-0.814726	-0.862981	0.502753	0.152368	1.08908	-0.274091	-0.282977	1.02381	-0.0898261	-0.358718	0.110613	-0.358739	-0.0953026	-0.253856	-0.15099	-0.19307	0.848721	0.110739	-0.15099	-0.261729	0.14563	biological regulation;biosynthetic process;calcium ion homeostasis;catabolic process;cation homeostasis;cellular biosynthetic process;cellular macromolecule biosynthetic process;cellular macromolecule metabolic process;cellular metabolic process;cellular nitrogen compound metabolic process;cellular process;cellular protein metabolic process;cellular response to chemical stimulus;cellular response…	acid-amino acid ligase activity;binding;catalytic activity;cation binding;chromatin binding;DNA binding;estrogen response element binding;histone acetyl-lysine binding;histone binding;ion binding;kinase activity;ligase activity;ligase activity, forming carbon-nitrogen bonds;metal ion binding;nucleic acid binding;p53 binding;phosphotransferase activity, alcohol group as acceptor;protein binding;pr…	cell part;chromatin;chromosomal part;cytoplasmic part;cytosol;euchromatin;intracellular membrane-bounded organelle;intracellular organelle;intracellular organelle part;intracellular part;membrane-bounded organelle;nuclear chromatin;nuclear chromosome part;nuclear euchromatin;nuclear part;nucleoplasm;nucleus;organelle;organelle part;perichromatin fibrils	biological regulation;biosynthetic process;catabolic process;cellular metabolic process;cellular nitrogen compound metabolic process;cellular process;homeostatic process;macromolecule metabolic process;macromolecule modification;metabolic process;nitrogen compound metabolic process;nucleobase-containing compound metabolic process;phosphorus metabolic process;primary metabolic process;protein cata…	cell part;cytosol;intracellular membrane-bounded organelle;intracellular organelle;nucleoplasm;nucleus;organelle		Bromodomain;PHD;zf-B_box	AAAGACA,MIR-511;BENPORATH_ES_1;BENPORATH_MYC_MAX_TARGETS;BENPORATH_NANOG_TARGETS;BENPORATH_NOS_TARGETS;BENPORATH_OCT4_TARGETS;BENPORATH_SOX2_TARGETS;BIOPOLYMER_METABOLIC_PROCESS;BLALOCK_ALZHEIMERS_DISEASE_UP;chr7q32;COLIN_PILOCYTIC_ASTROCYTOMA_VS_GLIOBLASTOMA_DN;CREIGHTON_ENDOCRINE_THERAPY_RESISTANCE_2;CTTTGT_V$LEF1_Q2;DACOSTA_UV_RESPONSE_VIA_ERCC3_DN;DACOSTA_UV_RESPONSE_VIA_ERCC3_TTD_DN;DODD_NAS…	3D-structure;Alternativesplicing;Bromodomain;Chromosomalrearrangement;Coiledcoil;Completeproteome;Cytoplasm;Directproteinsequencing;DNA-binding;Isopeptidebond;Ligase;Metal-binding;Nucleus;Phosphoprotein;Polymorphism;Referenceproteome;Repeat;Repressor;Transcription;Transcriptionregulation;Tumorsuppressor;Ublconjugation;Ublconjugationpathway;Zinc;Zinc-finger		24	24	24	37.3	37.3	37.3	113.02	0	275.97	1281500000	904910000	376620000	O15164-2;O15164	O15164-2;O15164	Transcription intermediary factor 1-alpha	TRIM24	408
0.809681	0.435699	0.06013	-0.000738127	0.401863	0.500766	0.940921	0.500196	0.76998	0.781572	0.324074	0.355352	0.991692	0.284676	0.242528	0.589669	0.328272	0.613303	0.941188	0.500196	0.355352	-0.144844	0.283901	biological regulation;cellular process;cellular response to chemical stimulus;cellular response to endogenous stimulus;cellular response to hormone stimulus;cellular response to organic substance;cellular response to steroid hormone stimulus;cellular response to stimulus;hormone-mediated signaling pathway;regulation of biological process;regulation of cellular process;response to chemical stimulu…	binding;cation binding;heme binding;ion binding;iron ion binding;ligand-dependent nuclear receptor activity;lipid binding;metal ion binding;molecular transducer activity;receptor activity;signal transducer activity;signaling receptor activity;steroid binding;steroid hormone receptor activity;tetrapyrrole binding;transition metal ion binding	cell part;endomembrane system;integral to membrane;intrinsic to membrane;membrane;membrane part	biological regulation;cellular process;response to chemical stimulus;response to endogenous stimulus;response to stimulus;signal transduction	cell part;endomembrane system;membrane		Cyt-b5	AACTTT_UNKNOWN;ACCAAAG,MIR-9;ACEVEDO_LIVER_CANCER_DN;ACEVEDO_NORMAL_TISSUE_ADJACENT_TO_LIVER_TUMOR_DN;ATGTACA,MIR-493;BUYTAERT_PHOTODYNAMIC_THERAPY_STRESS_DN;CAGTGTT,MIR-141,MIR-200A;CCTGCTG,MIR-214;chr4q26;CHUNG_BLISTER_CYTOTOXICITY_UP;DAUER_STAT3_TARGETS_DN;DAZARD_RESPONSE_TO_UV_SCC_DN;DEURIG_T_CELL_PROLYMPHOCYTIC_LEUKEMIA_DN;DIAZ_CHRONIC_MEYLOGENOUS_LEUKEMIA_UP;ENK_UV_RESPONSE_KERATINOCYTE_DN;…	Alternativesplicing;Completeproteome;Lipid-binding;Membrane;Phosphoprotein;Receptor;Referenceproteome;Steroid-binding;Transmembrane;Transmembranehelix		10	9	9	50.2	50.2	50.2	23.818	0	222.04	2196200000	1468400000	727830000	O15173;O15173-2	O15173;O15173-2	Membrane-associated progesterone receptor component 2	PGRMC2	409
-1.1682	-1.00105	-0.459193	-0.405791	-0.87833	-0.968318	-0.704768	-0.457563	-0.807763	-0.807719	-0.454749	-0.976346	-0.89178	-0.816838	-0.655972	-0.848349	-0.742968	-1.00055	0.725692	-0.807763	-0.816838	-0.00907564	0.496402	cellular component assembly;cellular component assembly at cellular level;cellular component organization;cellular component organization at cellular level;cellular component organization or biogenesis;cellular component organization or biogenesis at cellular level;cellular macromolecular complex assembly;cellular macromolecular complex subunit organization;cellular macromolecule metabolic proces…	binding;chaperone binding;protein binding;unfolded protein binding	cell part;cytoplasm;cytoplasmic part;cytosolic part;intracellular part;macromolecular complex;prefoldin complex;protein complex	cellular component assembly;cellular component organization;cellular macromolecular complex assembly;cellular metabolic process;cellular process;macromolecular complex assembly;macromolecule metabolic process;metabolic process;primary metabolic process;protein complex assembly;protein folding;protein metabolic process	cell part;cytoplasm;macromolecular complex;protein complex		Prefoldin_2	ACEVEDO_LIVER_TUMOR_VS_NORMAL_ADJACENT_TISSUE_UP;BERENJENO_TRANSFORMED_BY_RHOA_UP;CACGTG_V$MYC_Q2;CHEOK_RESPONSE_TO_MERCAPTOPURINE_AND_HD_MTX_DN;chr6p21;DAIRKEE_TERT_TARGETS_UP;DANG_BOUND_BY_MYC;DAZARD_RESPONSE_TO_UV_SCC_UP;GCNP_SHH_UP_LATE.V1_UP;GRADE_COLON_CANCER_UP;GSE10239_MEMORY_VS_DAY4.5_EFF_CD8_TCELL_UP;GSE1460_NAIVE_CD4_TCELL_ADULT_BLOOD_VS_THYMIC_STROMAL_CELL_DN;GSE16522_ANTI_CD3CD28_STI…	Acetylation;Chaperone;Completeproteome;Referenceproteome	CCT:PFD complex;CCT:PFD complex, testis specific;Prefoldin;Prefoldin complex	8	8	8	55	55	55	14.582	0	88.163	1877700000	826630000	1051100000	O15212	O15212	Prefoldin subunit 6	PFDN6	411
0.0452636	-0.24976	-1.26142	-1.60118	0.741596	0.136436	0.300446	-1.06324	0.147275	0.0417324	-1.04966	-0.956289	-0.108232	-0.975091	-0.96011	-0.379284	-0.334847	-0.283559	0.435164	0.0452636	-0.379284	-0.424548	0.0418454	cellular macromolecule metabolic process;cellular metabolic process;cellular nitrogen compound metabolic process;cellular process;macromolecule metabolic process;maturation of SSU-rRNA;maturation of SSU-rRNA from tricistronic rRNA transcript (SSU-rRNA, 5.8S rRNA, LSU-rRNA);metabolic process;ncRNA metabolic process;ncRNA processing;nitrogen compound metabolic process;nucleic acid metabolic process…		90S preribosome;cell part;intracellular non-membrane-bounded organelle;intracellular organelle;intracellular organelle part;intracellular part;macromolecular complex;non-membrane-bounded organelle;nuclear part;nucleolus;organelle;organelle part;preribosome;ribonucleoprotein complex;small-subunit processome	cellular metabolic process;cellular nitrogen compound metabolic process;cellular process;macromolecule metabolic process;metabolic process;nitrogen compound metabolic process;nucleobase-containing compound metabolic process;primary metabolic process;RNA metabolic process;RNA processing;rRNA processing	cell part;intracellular non-membrane-bounded organelle;intracellular organelle;macromolecular complex;nucleolus;organelle;preribosome;ribonucleoprotein complex		BING4CT;WD40	BENPORATH_MYC_MAX_TARGETS;BHAT_ESR1_TARGETS_NOT_VIA_AKT1_UP;BHAT_ESR1_TARGETS_VIA_AKT1_UP;BOCHKIS_FOXA2_TARGETS;BYSTRYKH_HEMATOPOIESIS_STEM_CELL_QTL_TRANS;CACGTG_V$MYC_Q2;CAIRO_HEPATOBLASTOMA_CLASSES_UP;CASORELLI_ACUTE_PROMYELOCYTIC_LEUKEMIA_DN;chr6p21;DANG_BOUND_BY_MYC;DUTERTRE_ESTRADIOL_RESPONSE_6HR_UP;ESC_V6.5_UP_LATE.V1_DN;GNF2_APEX1;GOLDRATH_NAIVE_VS_EFF_CD8_TCELL_UP;GRAESSMANN_APOPTOSIS_BY_…	Completeproteome;Nucleus;Phosphoprotein;Polymorphism;Referenceproteome;Repeat;WDrepeat		12	12	12	22.8	22.8	22.8	68.07	0	65.871	955260000	538140000	417120000	O15213	O15213	WD repeat-containing protein 46	WDR46	412
-0.113482	-1.2282	-1.54535	-1.90426	-0.280608	-1.08405	-1.30096	-1.46495	-0.574672	-0.62329	-1.4071	-1.09384	-1.23098	-0.81983	-1.51802	-0.650988	-1.61292	-0.408452	0.954024	-1.2282	-1.09384	0.134358	0.282454	biological regulation;biosynthetic process;cellular biosynthetic process;cellular macromolecule biosynthetic process;cellular macromolecule metabolic process;cellular metabolic process;cellular nitrogen compound metabolic process;cellular process;macromolecule biosynthetic process;macromolecule metabolic process;metabolic process;negative regulation of biological process;negative regulation of bi…	binding;DNA binding;nucleic acid binding	cell part;cytoplasmic part;endoplasmic reticulum;intracellular membrane-bounded organelle;intracellular non-membrane-bounded organelle;intracellular organelle;intracellular organelle part;intracellular part;membrane-bounded organelle;non-membrane-bounded organelle;nuclear part;nucleolus;nucleus;organelle;organelle part	biological regulation;biosynthetic process;cellular metabolic process;cellular nitrogen compound metabolic process;cellular process;macromolecule metabolic process;metabolic process;nitrogen compound metabolic process;nucleobase-containing compound metabolic process;primary metabolic process;RNA metabolic process	cell part;endoplasmic reticulum;intracellular membrane-bounded organelle;intracellular non-membrane-bounded organelle;intracellular organelle;nucleolus;nucleus;organelle		G-patch;R3H	CATTTCA,MIR-203;chrxq24;CTTTGTA,MIR-524;GEORGES_TARGETS_OF_MIR192_AND_MIR215;GREGORY_SYNTHETIC_LETHAL_WITH_IMATINIB;GSE10325_BCELL_VS_LUPUS_BCELL_UP;GSE10325_LUPUS_BCELL_VS_LUPUS_MYELOID_UP;GSE13411_IGM_MEMORY_BCELL_VS_PLASMA_CELL_UP;GSE13411_SWITCHED_MEMORY_BCELL_VS_PLASMA_CELL_UP;GSE13484_UNSTIM_VS_YF17D_VACCINE_STIM_PBMC_UP;GSE20366_EX_VIVO_VS_HOMEOSTATIC_CONVERSION_NAIVE_CD4_TCELL_UP;GSE2197_…	Alternativesplicing;Completeproteome;DNA-binding;Nucleus;Referenceproteome;Repressor;Transcription;Transcriptionregulation		21	21	21	37.5	37.5	37.5	77.672	0	79.776	922490000	442010000	480490000	O15226;O15226-2	O15226;O15226-2	NF-kappa-B-repressing factor	NKRF	413
0.196544	-0.875267	-0.6537	-0.698127	-0.0832584	-0.622336	-0.360077	-0.630208	-0.0722267	-0.0814102	-1.03502	-0.421834	-0.444918	-0.462818	-1.18329	-1.62462	-1.13312	0.15061	0.255021	-0.622336	-0.462818	0.159519	0.248858	anatomical structure formation involved in morphogenesis;anatomical structure morphogenesis;biosynthetic process;carboxylic acid biosynthetic process;carboxylic acid metabolic process;cell junction assembly;cell junction organization;cell-cell junction assembly;cell-cell junction organization;cellular biosynthetic process;cellular component assembly;cellular component assembly at cellular level;c…	acetyltransferase activity;acyl-CoA thioesterase activity;binding;catalytic activity;CoA hydrolase activity;glycerone-phosphate O-acyltransferase activity;hydrolase activity;hydrolase activity, acting on ester bonds;O-acetyltransferase activity;O-acyltransferase activity;palmitoyl-CoA hydrolase activity;protein binding;receptor binding;thiolester hydrolase activity;transferase activity;transferas…	cell part;cytoplasmic part;intracellular membrane-bounded organelle;intracellular organelle;intracellular organelle lumen;intracellular organelle part;intracellular part;membrane;membrane-bounded organelle;membrane-enclosed lumen;microbody;microbody lumen;microbody membrane;microbody part;mitochondrion;organelle;organelle lumen;organelle membrane;organelle part;peroxisomal matrix;peroxisomal memb…	anatomical structure formation involved in morphogenesis;anatomical structure morphogenesis;biosynthetic process;cell junction organization;cellular component assembly;cellular component organization;cellular ketone metabolic process;cellular lipid metabolic process;cellular metabolic process;cellular process;developmental process;glycerol ether metabolic process;lipid metabolic process;membrane …	cell part;intracellular membrane-bounded organelle;intracellular organelle;membrane;microbody;mitochondrion;organelle;peroxisome	Glycerophospholipid metabolism;Peroxisome	Acyltransferase	ACEVEDO_LIVER_CANCER_UP;ACEVEDO_LIVER_TUMOR_VS_NORMAL_ADJACENT_TISSUE_UP;ANATOMICAL_STRUCTURE_DEVELOPMENT;ANATOMICAL_STRUCTURE_MORPHOGENESIS;BENPORATH_MYC_MAX_TARGETS;BRUINS_UVC_RESPONSE_VIA_TP53_GROUP_A;BURTON_ADIPOGENESIS_5;CAIRO_HEPATOBLASTOMA_UP;CARBOXYLIC_ACID_METABOLIC_PROCESS;CELLULAR_LIPID_METABOLIC_PROCESS;CHOW_RASSF1_TARGETS_UP;chr1q42;CYTOPLASM;CYTOPLASMIC_PART;ENK_UV_RESPONSE_KERATINO…	Acetylation;Acyltransferase;Alternativesplicing;Cataract;Completeproteome;Directproteinsequencing;Diseasemutation;Dwarfism;Membrane;Peroxisome;Referenceproteome;Rhizomelicchondrodysplasiapunctata;Transferase	AGPS-GNPAT complex	21	21	21	38.4	38.4	38.4	77.187	0	109.66	1516800000	798900000	717890000	O15228;O15228-2	O15228;O15228-2	Dihydroxyacetone phosphate acyltransferase	GNPAT	414
0.441921	-0.934085	-0.580691	-0.315611	-1.3276	-0.190557	-0.943527	-0.435166	0.0669144	-1.29595	-0.832133	-0.652008	-0.198327	-0.076421	-0.471904	-1.23257	-0.869503	0.0159915	0.532859	-0.435166	-0.652008	-0.216842	0.192296	carboxylic acid catabolic process;carboxylic acid metabolic process;catabolic process;cellular catabolic process;cellular ketone metabolic process;cellular lipid catabolic process;cellular lipid metabolic process;cellular metabolic process;cellular process;fatty acid beta-oxidation;fatty acid beta-oxidation using acyl-CoA oxidase;fatty acid catabolic process;fatty acid metabolic process;fatty aci…	acyl-CoA dehydrogenase activity;acyl-CoA oxidase activity;binding;catalytic activity;coenzyme binding;cofactor binding;flavin adenine dinucleotide binding;oxidoreductase activity;oxidoreductase activity, acting on the CH-CH group of donors;oxidoreductase activity, acting on the CH-CH group of donors, oxygen as acceptor;pristanoyl-CoA oxidase activity;protein binding;receptor binding	cell part;cytoplasmic part;intracellular membrane-bounded organelle;intracellular organelle;intracellular organelle lumen;intracellular organelle part;intracellular part;membrane;membrane-bounded organelle;membrane-enclosed lumen;microbody;microbody lumen;microbody part;mitochondrion;organelle;organelle lumen;organelle part;peroxisomal matrix;peroxisomal part;peroxisome	catabolic process;cellular ketone metabolic process;cellular lipid metabolic process;cellular metabolic process;cellular process;lipid metabolic process;metabolic process;organic acid metabolic process;primary metabolic process;small molecule metabolic process	cell part;intracellular membrane-bounded organelle;intracellular organelle;membrane;microbody;mitochondrion;organelle;peroxisome	alpha-Linolenic acid metabolism;Biosynthesis of unsaturated fatty acids;Fatty acid metabolism;Peroxisome;PPAR signaling pathway	ACOX;Acyl-CoA_dh_1;Acyl-CoA_dh_M	ACEVEDO_LIVER_CANCER_DN;ACEVEDO_LIVER_TUMOR_VS_NORMAL_ADJACENT_TISSUE_DN;BENPORATH_MYC_MAX_TARGETS;BILE_ACID_METABOLIC_PROCESS;BLALOCK_ALZHEIMERS_DISEASE_UP;CAGGTG_V$E12_Q6;CARBOXYLIC_ACID_METABOLIC_PROCESS;CELLULAR_LIPID_METABOLIC_PROCESS;chr4p15;CYTOPLASM;CYTOPLASMIC_PART;DANG_BOUND_BY_MYC;DUTERTRE_ESTRADIOL_RESPONSE_24HR_DN;FATTY_ACID_METABOLIC_PROCESS;FIGUEROA_AML_METHYLATION_CLUSTER_6_UP;GRA…	Acetylation;Alternativesplicing;Completeproteome;FAD;Fattyacidmetabolism;Flavoprotein;Lipidmetabolism;Oxidoreductase;Peroxisome;Phosphoprotein;Polymorphism;Referenceproteome		12	12	12	26.3	26.3	26.3	77.628	0	58.19	491370000	253580000	237790000	O15254;O15254-2	O15254;O15254-2	Peroxisomal acyl-coenzyme A oxidase 3	ACOX3	422
0.397692	0.102386	0.0555213	0.109851	0.0888949	0.586553	0.264996	-0.115991	0.519898	0.0829893	0.160597	0.685519	0.312828	0.0840588	0.0590147	-0.0393414	0.467622	0.468982	0.791524	0.109851	0.160597	0.0507466	0.407151	biological regulation;cellular component organization;cellular component organization or biogenesis;cellular localization;cellular macromolecule localization;cellular membrane organization;cellular process;cellular protein localization;establishment of localization;establishment of localization in cell;Golgi vesicle transport;intracellular transport;localization;macromolecule localization;membran…		cell part;cell surface;cytoplasmic part;endoplasmic reticulum-Golgi intermediate compartment;Golgi apparatus;Golgi apparatus part;integral to Golgi membrane;integral to membrane;integral to organelle membrane;intracellular membrane-bounded organelle;intracellular organelle;intracellular organelle part;intracellular part;intrinsic to Golgi membrane;intrinsic to membrane;intrinsic to organelle memb…	biological regulation;cellular component organization;cellular localization;cellular membrane organization;cellular process;establishment of localization;Golgi vesicle transport;localization;membrane organization;transport;vesicle-mediated transport	cell part;cell surface;Golgi apparatus;intracellular membrane-bounded organelle;intracellular organelle;organelle		Rer1	ALFANO_MYC_TARGETS;BLALOCK_ALZHEIMERS_DISEASE_UP;BROWNE_HCMV_INFECTION_1HR_DN;BROWNE_HCMV_INFECTION_30MIN_DN;BROWNE_HCMV_INFECTION_48HR_DN;CATRRAGC_UNKNOWN;CELLULAR_LOCALIZATION;chr1p36;CYTOPLASM;CYTOPLASMIC_PART;DIAZ_CHRONIC_MEYLOGENOUS_LEUKEMIA_UP;ENDOMEMBRANE_SYSTEM;ENK_UV_RESPONSE_KERATINOCYTE_UP;ESTABLISHMENT_OF_CELLULAR_LOCALIZATION;ESTABLISHMENT_OF_LOCALIZATION;GOLGI_APPARATUS;GOLGI_APPARA…	Acetylation;Completeproteome;Golgiapparatus;Membrane;Phosphoprotein;Referenceproteome;Transmembrane;Transmembranehelix		8	8	8	44.4	44.4	44.4	22.958	0	44.69	2715600000	1851800000	863790000	O15258	O15258	Protein RER1	RER1	423
0.0106102	-0.844932	-0.237908	-0.0729453	-0.552573	-0.19186	-0.542409	-0.315415	0.362173	-0.283097	-0.0146787	0.0062144	-0.721442	-0.535169	-0.523784	-0.98678	-0.608345	0.229624	0.518456	-0.237908	-0.523784	-0.285877	0.12397	biological regulation;cellular component organization;cellular component organization at cellular level;cellular component organization or biogenesis;cellular component organization or biogenesis at cellular level;cellular process;Golgi organization;organelle organization;positive regulation of biological process;positive regulation of cellular component organization;positive regulation of cellul…		cell part;cytoplasmic part;endoplasmic reticulum membrane;endoplasmic reticulum part;endoplasmic reticulum-Golgi intermediate compartment;endoplasmic reticulum-Golgi intermediate compartment membrane;Golgi apparatus part;Golgi membrane;integral to membrane;intracellular membrane-bounded organelle;intracellular organelle;intracellular organelle part;intracellular part;intrinsic to membrane;membran…	biological regulation;cellular component organization;cellular process;Golgi organization;organelle organization;regulation of organelle organization	cell part;intracellular membrane-bounded organelle;intracellular organelle;membrane;organelle		SURF4	CAGGTG_V$E12_Q6;chr9q33;CYTOPLASM;CYTOPLASMIC_PART;ER_GOLGI_INTERMEDIATE_COMPARTMENT;FEVR_CTNNB1_TARGETS_UP;GCANCTGNY_V$MYOD_Q6;GRAESSMANN_APOPTOSIS_BY_DOXORUBICIN_UP;GRAESSMANN_APOPTOSIS_BY_SERUM_DEPRIVATION_UP;GRAESSMANN_RESPONSE_TO_MC_AND_DOXORUBICIN_UP;GSE11057_NAIVE_VS_CENT_MEMORY_CD4_TCELL_DN;GSE15324_NAIVE_VS_ACTIVATED_ELF4_KO_CD8_TCELL_DN;GSE15930_NAIVE_VS_24H_IN_VITRO_STIM_CD8_TCELL_UP;G…	Alternativesplicing;Completeproteome;Endoplasmicreticulum;Golgiapparatus;Membrane;Referenceproteome;Transmembrane;Transmembranehelix		6	6	6	46.5	46.5	46.5	17.97	0	91.071	9093400000	5311100000	3782300000	O15260-2;O15260;O15260-3	O15260-2;O15260;O15260-3	Surfeit locus protein 4	SURF4	424
0.480369	0.292236	0.283308	0.180285	0.377871	0.333095	-0.162304	-0.432538	0.490226	-0.266988	0.10281	0.638531	0.37157	-0.179057	0.401057	0.030303	-0.0435616	0.413479	0.777887	0.292236	0.10281	-0.189425	0.224848	alcohol biosynthetic process;alcohol metabolic process;amine metabolic process;biosynthetic process;cellular biosynthetic process;cellular lipid metabolic process;cellular metabolic process;cellular nitrogen compound biosynthetic process;cellular nitrogen compound metabolic process;cellular process;ceramide biosynthetic process;ceramide metabolic process;lipid biosynthetic process;lipid metabolic…	binding;C-acyltransferase activity;catalytic activity;cofactor binding;C-palmitoyltransferase activity;palmitoyltransferase activity;pyridoxal phosphate binding;serine C-palmitoyltransferase activity;transferase activity;transferase activity, transferring acyl groups;transferase activity, transferring acyl groups other than amino-acyl groups;vitamin B6 binding;vitamin binding	cell part;cytoplasmic part;endoplasmic reticulum membrane;endoplasmic reticulum palmitoyltransferase complex;endoplasmic reticulum part;integral to membrane;intracellular organelle part;intracellular part;intrinsic to membrane;macromolecular complex;membrane;membrane part;organelle membrane;organelle part;palmitoyltransferase complex;protein complex;serine C-palmitoyltransferase complex;SPOTS com…	alcohol metabolic process;amine metabolic process;biosynthetic process;cellular lipid metabolic process;cellular metabolic process;cellular nitrogen compound metabolic process;cellular process;lipid metabolic process;metabolic process;nitrogen compound metabolic process;primary metabolic process;small molecule metabolic process	cell part;macromolecular complex;membrane;protein complex	Sphingolipid metabolism	Aminotran_1_2	AAGCACT,MIR-520F;BONCI_TARGETS_OF_MIR15A_AND_MIR16_1;BRUINS_UVC_RESPONSE_LATE;BRUINS_UVC_RESPONSE_VIA_TP53_GROUP_B;CELLULAR_LIPID_METABOLIC_PROCESS;chr9q21;DIAZ_CHRONIC_MEYLOGENOUS_LEUKEMIA_UP;DOUGLAS_BMI1_TARGETS_UP;GCM_BAG5;GCM_CHUK;GCM_NF2;GCM_NUMA1;GCM_RAB10;GRAESSMANN_APOPTOSIS_BY_SERUM_DEPRIVATION_UP;GSE10463_CD40L_AND_VA347_VS_CD40L_IN_DC_UP;GSE13484_12H_UNSTIM_VS_YF17D_VACCINE_STIM_PBMC_U…	Acyltransferase;Alternativesplicing;Completeproteome;Diseasemutation;Endoplasmicreticulum;Lipidmetabolism;Membrane;Neurodegeneration;Neuropathy;Phosphoprotein;Polymorphism;Pyridoxalphosphate;Referenceproteome;Sphingolipidmetabolism;Transferase;Transmembrane;Transmembranehelix	Serine-palmitoyltransferase (SPT) complex	18	18	18	47.4	47.4	47.4	52.743	0	139.76	5281100000	3498500000	1782600000	O15269;O15269-2	O15269	Serine palmitoyltransferase 1	SPTLC1	425
1.11027	0.83189	0.767844	0.313798	0.717559	0.320407	0.106891	-0.280204	0.553373	-0.111236	0.0508539	1.28801	0.96814	0.176282	0.881175	0.64881	-0.278405	0.572069	0.905845	0.553373	0.572069	0.0186957	0.458472	alcohol biosynthetic process;alcohol metabolic process;amine metabolic process;biosynthetic process;cellular biosynthetic process;cellular lipid metabolic process;cellular metabolic process;cellular nitrogen compound biosynthetic process;cellular nitrogen compound metabolic process;cellular process;ceramide biosynthetic process;ceramide metabolic process;lipid biosynthetic process;lipid metabolic…	binding;C-acyltransferase activity;catalytic activity;cofactor binding;C-palmitoyltransferase activity;palmitoyltransferase activity;pyridoxal phosphate binding;serine C-palmitoyltransferase activity;transferase activity;transferase activity, transferring acyl groups;transferase activity, transferring acyl groups other than amino-acyl groups;vitamin B6 binding;vitamin binding	cell part;cytoplasmic part;endoplasmic reticulum membrane;endoplasmic reticulum palmitoyltransferase complex;endoplasmic reticulum part;integral to membrane;intracellular membrane-bounded organelle;intracellular organelle;intracellular organelle part;intracellular part;intrinsic to membrane;macromolecular complex;membrane;membrane part;membrane-bounded organelle;mitochondrion;organelle;organelle …	alcohol metabolic process;amine metabolic process;biosynthetic process;cellular lipid metabolic process;cellular metabolic process;cellular nitrogen compound metabolic process;cellular process;lipid metabolic process;metabolic process;nitrogen compound metabolic process;primary metabolic process;small molecule metabolic process	cell part;intracellular membrane-bounded organelle;intracellular organelle;macromolecular complex;membrane;mitochondrion;organelle;protein complex	Sphingolipid metabolism	Aminotran_1_2	AAAGACA,MIR-511;AAAYRNCTG_UNKNOWN;ACCAAAG,MIR-9;AGCYRWTTC_UNKNOWN;ATM_DN.V1_DN;BENPORATH_MYC_MAX_TARGETS;BLALOCK_ALZHEIMERS_DISEASE_UP;BONOME_OVARIAN_CANCER_SURVIVAL_OPTIMAL_DEBULKING;BOQUEST_STEM_CELL_CULTURED_VS_FRESH_UP;BOQUEST_STEM_CELL_DN;BRUINS_UVC_RESPONSE_EARLY_LATE;BUYTAERT_PHOTODYNAMIC_THERAPY_STRESS_UP;BYSTRYKH_HEMATOPOIESIS_STEM_CELL_AND_BRAIN_QTL_TRANS;CAGGTG_V$E12_Q6;CAIRO_HEPATOBLA…	Acyltransferase;Completeproteome;Diseasemutation;Endoplasmicreticulum;Lipidmetabolism;Membrane;Neuropathy;Pyridoxalphosphate;Referenceproteome;Sphingolipidmetabolism;Transferase;Transmembrane;Transmembranehelix	Serine-palmitoyltransferase (SPT) complex	24	24	24	54.6	54.6	54.6	62.924	0	176.19	2807100000	1950200000	856840000	O15270	O15270	Serine palmitoyltransferase 2	SPTLC2	426
-0.0350182	0.0887873	-0.521946	-0.362814	0.413789	-0.0916432	0.814353	-0.0717762	-0.245862	-0.0615652	0.000164045	-0.590576	0.233554	-0.319816	-0.126389	0.120981	0.166001	-0.177507	0.615498	-0.0717762	-0.0615652	0.0102109	0.472211	apoptosis;biological regulation;carbohydrate metabolic process;cell communication;cell death;cellular carbohydrate metabolic process;cellular component organization;cellular component organization at cellular level;cellular component organization or biogenesis;cellular component organization or biogenesis at cellular level;cellular macromolecule metabolic process;cellular metabolic process;cellul…	acetylglucosaminyltransferase activity;binding;catalytic activity;enzyme activator activity;enzyme regulator activity;lipid binding;phosphatidylinositol binding;phosphatidylinositol-3,4,5-trisphosphate binding;phospholipid binding;protein N-acetylglucosaminyltransferase activity;transferase activity;transferase activity, transferring glycosyl groups;transferase activity, transferring hexosyl grou…	cell part;cytoplasm;cytoplasmic part;cytoskeletal part;cytosol;histone acetyltransferase complex;histone methyltransferase complex;intracellular membrane-bounded organelle;intracellular organelle;intracellular organelle part;intracellular part;macromolecular complex;membrane;membrane-bounded organelle;methyltransferase complex;microtubule organizing center;mitochondrion;MLL5-L complex;nuclear par…	biological regulation;carbohydrate metabolic process;cell communication;cell death;cellular component organization;cellular metabolic process;cellular process;chromatin modification;chromatin organization;chromosome organization;death;histone modification;macromolecule metabolic process;macromolecule modification;metabolic process;one-carbon metabolic process;organelle organization;peptidyl-amino…	cell part;cytoplasm;cytosol;histone methyltransferase complex;intracellular membrane-bounded organelle;intracellular organelle;macromolecular complex;membrane;microtubule organizing center;mitochondrion;nucleoplasm;nucleus;organelle;plasma membrane;protein complex	Other types of O-glycan biosynthesis	Glyco_transf_41;TPR_1	AAACCAC,MIR-140;AACATTC,MIR-409-3P;AACGGTT,MIR-451;AAGCAAT,MIR-137;ACATTCC,MIR-1,MIR-206;ACETYLGLUCOSAMINYLTRANSFERASE_ACTIVITY;ACEVEDO_FGFR1_TARGETS_IN_PROSTATE_CANCER_MODEL_DN;ACTGCAG,MIR-17-3P;AGCGCAG,MIR-191;AGGAAGC,MIR-516-3P;AGGAGTG,MIR-483;AGGCACT,MIR-515-3P;AGGGCAG,MIR-18A;AGGTGCA,MIR-500;AMUNDSON_RESPONSE_TO_ARSENITE;ATAACCT,MIR-154;ATGCAGT,MIR-217;ATGCTGC,MIR-103,MIR-107;ATGTAGC,MIR-221…	3D-structure;Acetylation;Alternativesplicing;Apoptosis;Biologicalrhythms;Cellmembrane;Chromatinregulator;Completeproteome;Cytoplasm;Directproteinsequencing;Glycoprotein;Glycosyltransferase;Lipid-binding;Membrane;Mitochondrion;Nucleus;Phosphoprotein;Polymorphism;Referenceproteome;Repeat;TPRrepeat;Transferase;Ublconjugation	HCF-1 complex;OGT-TRAK1-TRAK2 complex	35	35	2	40.2	40.2	2.8	116.92	0	230.31	4196600000	2520100000	1676600000	O15294;O15294-2;O15294-4	O15294;O15294-2;O15294-4	UDP-N-acetylglucosamine--peptide N-acetylglucosaminyltransferase 110 kDa subunit	OGT	427
-1.31755	-0.117971	0.445835	0.356031	-0.843108	-0.812696	-0.310836	-0.166634	-0.284496	-0.193692	-0.231974	-0.401813	-1.23538	-0.520895	-0.0203279	-0.252689	-0.239702	-1.80093	0.463452	-0.284496	-0.252689	0.0318069	0.437343	alcohol biosynthetic process;alcohol metabolic process;biosynthetic process;carbohydrate biosynthetic process;carbohydrate metabolic process;cellular biosynthetic process;cellular carbohydrate biosynthetic process;cellular carbohydrate metabolic process;cellular macromolecule metabolic process;cellular metabolic process;cellular nitrogen compound metabolic process;cellular process;cellular protei…	catalytic activity;intramolecular transferase activity;intramolecular transferase activity, phosphotransferases;isomerase activity;phosphomannomutase activity	cell body;cell part;cytoplasmic part;cytosol;extracellular membrane-bounded organelle;extracellular organelle;extracellular region part;extracellular vesicular exosome;intracellular part;membrane-bounded organelle;membrane-bounded vesicle;neuronal cell body;organelle;vesicle	alcohol metabolic process;biosynthetic process;carbohydrate metabolic process;cellular metabolic process;cellular nitrogen compound metabolic process;cellular process;macromolecule metabolic process;macromolecule modification;metabolic process;nitrogen compound metabolic process;nucleobase-containing compound metabolic process;nucleotide-sugar metabolic process;oligosaccharide metabolic process;p…	cell body;cell part;cytosol;extracellular organelle;neuronal cell body;organelle;vesicle	Amino sugar and nucleotide sugar metabolism;Fructose and mannose metabolism	PMM	ALCOHOL_METABOLIC_PROCESS;BENPORATH_MYC_MAX_TARGETS;BHAT_ESR1_TARGETS_NOT_VIA_AKT1_UP;BHAT_ESR1_TARGETS_VIA_AKT1_UP;BILD_MYC_ONCOGENIC_SIGNATURE;BIOSYNTHETIC_PROCESS;BYSTRYKH_HEMATOPOIESIS_STEM_CELL_QTL_TRANS;CARBOHYDRATE_BIOSYNTHETIC_PROCESS;CARBOHYDRATE_METABOLIC_PROCESS;CELLULAR_BIOSYNTHETIC_PROCESS;CELLULAR_CARBOHYDRATE_METABOLIC_PROCESS;chr16p13;DACOSTA_UV_RESPONSE_VIA_ERCC3_COMMON_DN;DANG_B…	3D-structure;Acetylation;Alternativesplicing;Completeproteome;Congenitaldisorderofglycosylation;Cytoplasm;Diseasemutation;Isomerase;Polymorphism;Referenceproteome		9	9	9	45.9	45.9	45.9	28.082	0	74.752	613830000	343000000	270820000	O15305;O15305-2;Q92871	O15305;O15305-2	Phosphomannomutase 2	PMM2	429
0.71635	0.615595	0.438195	0.483659	0.746071	0.528869	0.0220571	0.0808986	1.15579	0.657324	0.296306	0.734348	0.657035	0.653858	0.558231	0.63174	0.462347	0.766725	0.58584	0.528869	0.653858	0.12499	0.295498	biological regulation;chemical homeostasis;cholesterol homeostasis;homeostatic process;lipid homeostasis;positive regulation of catalytic activity;positive regulation of molecular function;regulation of biological process;regulation of biological quality;regulation of catalytic activity;regulation of metabolic process;regulation of molecular function;sterol homeostasis;triglyceride homeostasis	enzyme activator activity;enzyme regulator activity	cell part;cytoplasmic part;endoplasmic reticulum exit site;endoplasmic reticulum part;extracellular region;intracellular organelle part;intracellular part;membrane;organelle part	biological regulation;homeostatic process	cell part;extracellular region;membrane		SH3_2	ACOSTA_PROLIFERATION_INDEPENDENT_MYC_TARGETS_DN;ATM_DN.V1_DN;BAELDE_DIABETIC_NEPHROPATHY_UP;BOCHKIS_FOXA2_TARGETS;BRACHAT_RESPONSE_TO_CAMPTOTHECIN_DN;BRACHAT_RESPONSE_TO_METHOTREXATE_DN;CACGTG_V$MYC_Q2;CAGGTA_V$AREB6_01;CHEMNITZ_RESPONSE_TO_PROSTAGLANDIN_E2_DN;chr14q13;CHUANG_OXIDATIVE_STRESS_RESPONSE_UP;CTAWWWATA_V$RSRFC4_Q2;CTTTAAR_UNKNOWN;DACOSTA_UV_RESPONSE_VIA_ERCC3_DN;DACOSTA_UV_RESPONSE_VI…	Alternativesplicing;Coiledcoil;Completeproteome;Glycoprotein;Phosphoprotein;Polymorphism;Referenceproteome;Secreted;SH3domain;Signal		21	21	21	40.3	40.3	40.3	81.84	0	255.01	940970000	644550000	296420000	O15320-8;O15320-4;O15320-3;O15320-10;O15320;Q96PC5;O15320-6;O15320-5;O15320-9;O15320-7;O15320-2;Q96RT6;A4FU28;Q8IX95;Q8IX94;Q86UF2;P0CG41;A4D2H0	O15320-8;O15320-4;O15320-3;O15320-10;O15320;Q96PC5;O15320-6;O15320-5;O15320-9;O15320-7;O15320-2	cTAGE family member 5;Melanoma inhibitory activity protein 2	CTAGE5;MIA2	430
[truncated: 4,201 more rows]

## Sheet: 29 regulated proteins
YOUNGER	YOUNGER	YOUNGER	YOUNGER	YOUNGER	YOUNGER	YOUNGER	YOUNGER	YOUNGER	OLDER	OLDER	OLDER	OLDER	OLDER	OLDER	OLDER	OLDER	OLDER
P101	P116	P118	P125	P127	P131	P142	P143	P154	P155	P110	P120	P137	P138	P139	P141	P144	P153	p-value	Median younger	Median elderly	FC elderly/younger	Significance	Majority protein IDs	Protein names	Gene names
-2.30506	-1.57069	-1.7601	-3.13647	-3.64031	-2.70971	-3.77422	0.0402808	-1.18672	0.393895	-0.419673	-4.19985	2.08442	0.641223	-0.30657	-1.18383	-2.30644	-0.231286	0.0444953	-2.30506	-0.30657	1.99849	0	P05091;P05091-2	Aldehyde dehydrogenase, mitochondrial	ALDH2
4.8175	NaN	3.94186	4.129	NaN	5.57957	NaN	5.51894	NaN	7.30427	7.51757	5.79303	5.56544	6.14219	5.02117	5.77707	NaN	5.42467	0.0212786	4.8175	5.78505	0.967549	3.58571e-05	Q05315	Galectin-10	CLC
[truncated: 27 more rows]
