# Supplementary material for: Biological characteristics of aging in human acute myeloid leukemia cells: the possible importance of aldehyde dehydrogenase, the cytoskeleton and altered transcriptional regulation
Source: Aging (Albany NY). 2020 Dec 20;12(24):24734–77. doi: 10.18632/aging.202361 (PMC7803495; doi:10.18632/aging.202361)
Supplement: Supplementary File 2 [file aging-12-202361-s009.xlsx]

## Sheet: Details
Supplementary File 2. Phosphoproteomic quantification of 18 low-risk patients.
MS phosphoproteomic data from nine elderly low-risk and nine younger low-risk patients
Datasheet "Phosphoproteome dataset 5 VV" contains the phosphoproteomics data after selecting 5 quantified valid values of each protein per group
Datasheet "105 phosphosites" contains significantly regulated phosphorylation sites after applying two variance t-test and Z-statistics

## Sheet: Phosphoproteome dataset 5 VV
YOUNGER	YOUNGER	YOUNGER	YOUNGER	YOUNGER	YOUNGER	YOUNGER	YOUNGER	YOUNGER	OLDER	OLDER	OLDER	OLDER	OLDER	OLDER	OLDER	OLDER	OLDER
P101	P116	P118	P125	P127	P131	P142	P143	P154	P155	P110	P120	P137	P138	P139	P141	P144	P153	p-value	Median younger	Median elderly	FC elderly/younger	Significance	Amino acid	Charge	Multiplicity	GOBP name	GOMF name	GOCC name	GOBP slim name	GOCC slim name	KEGG name	Pfam	GSEA	Keywords	Corum	Motifs	Known site	Origin	Localization prob	PEP	Score	Delta score	Score for localization	Mass error [ppm]	Intensity	Intensity L	Intensity H	Position	Score diff
1.87208	2.22713	NaN	0.268343	1.6044	0.168884	0.719247	NaN	-0.0903272	-0.372264	NaN	0.830062	NaN	1.19964	NaN	-0.214814	NaN	1.77985	0.565601	0.719247	0.830062	0.110815	0.328737	S	4	___1	cellular component organization;cellular component organization or biogenesis;cellular membrane organization;cellular process;endocytosis;establishment of localization;lipid transport;membrane invagination;membrane organization;organic substance transport;transport;vesicle-mediated transport	alcohol binding;amine binding;binding;calcium ion binding;calcium-dependent phospholipid binding;cation binding;identical protein binding;ion binding;lipid binding;metal ion binding;phosphatidylcholine binding;phosphatidylethanolamine binding;phosphatidylinositol binding;phospholipid binding;protein binding;quaternary ammonium group binding	cell part;cytoplasmic part;endoplasmic reticulum part;extrinsic to internal side of plasma membrane;extrinsic to membrane;extrinsic to plasma membrane;integral to membrane;integral to plasma membrane;intracellular organelle part;intracellular part;intrinsic to endoplasmic reticulum membrane;intrinsic to membrane;intrinsic to organelle membrane;intrinsic to plasma membrane;membrane;membrane part;o…	cellular component organization;cellular membrane organization;cellular process;endocytosis;establishment of localization;lipid transport;membrane invagination;membrane organization;transport;vesicle-mediated transport	cell part;membrane		C2	ACCAAAG,MIR-9;ATGCTGG,MIR-338;BROWN_MYELOID_CELL_DEVELOPMENT_UP;CATGTAA,MIR-496;CHARAFE_BREAST_CANCER_LUMINAL_VS_BASAL_DN;chr7q36;GABRIELY_MIR21_TARGETS;GRADE_COLON_CANCER_UP;GSE10239_KLRG1INT_VS_KLRG1HIGH_EFF_CD8_TCELL_DN;GSE10239_MEMORY_VS_KLRG1INT_EFF_CD8_TCELL_UP;GSE14350_TREG_VS_TEFF_IN_IL2RB_KO_UP;GSE2706_R848_VS_LPS_8H_STIM_DC_DN;GSE2706_R848_VS_R848_AND_LPS_8H_STIM_DC_DN;GSE27786_CD4_VS_C…	3D-structure;Alternativesplicing;Calcium;Cellmembrane;Completeproteome;Endocytosis;Endoplasmicreticulum;Lipid-binding;Lipidtransport;Membrane;Metal-binding;Phosphoprotein;Polymorphism;Referenceproteome;Repeat;Transmembrane;Transmembranehelix;Transport		Casein kinase II substrate motif;PKA kinase substrate motif	+	CST;HTP	0.989329	3.98765e-80	177.44	173.74	81.553	-0.093167	6157400000	4406800000	1750600000	663	17.4543
1.31617	1.57434	NaN	0.377481	NaN	-0.635395	0.531885	NaN	-1.0194	0.788138	NaN	NaN	0.956964	0.0545258	0.117013	1.07841	0.337867	NaN	0.678931	0.454683	0.563002	0.10832	0.331151	S	3	___1	cellular component organization;cellular component organization or biogenesis;cellular membrane organization;cellular process;endocytosis;establishment of localization;lipid transport;membrane invagination;membrane organization;organic substance transport;transport;vesicle-mediated transport	alcohol binding;amine binding;binding;calcium ion binding;calcium-dependent phospholipid binding;cation binding;identical protein binding;ion binding;lipid binding;metal ion binding;phosphatidylcholine binding;phosphatidylethanolamine binding;phosphatidylinositol binding;phospholipid binding;protein binding;quaternary ammonium group binding	cell part;cytoplasmic part;endoplasmic reticulum part;extrinsic to internal side of plasma membrane;extrinsic to membrane;extrinsic to plasma membrane;integral to membrane;integral to plasma membrane;intracellular organelle part;intracellular part;intrinsic to endoplasmic reticulum membrane;intrinsic to membrane;intrinsic to organelle membrane;intrinsic to plasma membrane;membrane;membrane part;o…	cellular component organization;cellular membrane organization;cellular process;endocytosis;establishment of localization;lipid transport;membrane invagination;membrane organization;transport;vesicle-mediated transport	cell part;membrane		C2	ACCAAAG,MIR-9;ATGCTGG,MIR-338;BROWN_MYELOID_CELL_DEVELOPMENT_UP;CATGTAA,MIR-496;CHARAFE_BREAST_CANCER_LUMINAL_VS_BASAL_DN;chr7q36;GABRIELY_MIR21_TARGETS;GRADE_COLON_CANCER_UP;GSE10239_KLRG1INT_VS_KLRG1HIGH_EFF_CD8_TCELL_DN;GSE10239_MEMORY_VS_KLRG1INT_EFF_CD8_TCELL_UP;GSE14350_TREG_VS_TEFF_IN_IL2RB_KO_UP;GSE2706_R848_VS_LPS_8H_STIM_DC_DN;GSE2706_R848_VS_R848_AND_LPS_8H_STIM_DC_DN;GSE27786_CD4_VS_C…	3D-structure;Alternativesplicing;Calcium;Cellmembrane;Completeproteome;Endocytosis;Endoplasmicreticulum;Lipid-binding;Lipidtransport;Membrane;Metal-binding;Phosphoprotein;Polymorphism;Referenceproteome;Repeat;Transmembrane;Transmembranehelix;Transport		14-3-3 domain binding motif;Calmodulin-dependent protein kinase II substrate motif;Calmodulin-dependent protein kinase IV substrate motif;Chk1 kinase substrate motif;G protein-coupled receptor kinase 1 substrate motif;MDC1 BRCT domain binding motif;PKA kinase substrate motif;PKC kinase substrate motif;Plk1 PBD domain binding motif	+	CST;HTP	0.858146	7.23449e-19	143.23	129.08	105.9	-0.14075	188670000	136920000	51750000	710	7.83531
0.0727432	0.165766	-0.414166	-0.301398	0.626556	0.0840508	0.425445	0.145164	0.0213095	0.127453	-0.392879	0.123655	-0.0804608	0.152933	-0.309574	-0.0339977	-0.209255	0.126648	0.268648	0.0840508	-0.0339977	-0.118048	0.431087	S	3	___1		protein binding transcription factor activity;RNA polymerase II transcription cofactor activity;RNA polymerase II transcription factor binding transcription factor activity;transcription cofactor activity;transcription factor binding transcription factor activity	cell part;intracellular membrane-bounded organelle;intracellular organelle;intracellular organelle part;intracellular part;macromolecular complex;mediator complex;membrane-bounded organelle;nuclear part;nucleoplasm part;nucleus;organelle;organelle part;protein complex		cell part;intracellular membrane-bounded organelle;intracellular organelle;macromolecular complex;nucleus;organelle;protein complex		Med19	CCTGCTG,MIR-214;chr11q12;GSE14000_TRANSLATED_RNA_VS_MRNA_4H_LPS_DC_UP;GSE14308_TH1_VS_INDUCED_TREG_DN;GSE14769_UNSTIM_VS_120MIN_LPS_BMDM_UP;GSE17974_1.5H_VS_72H_IL4_AND_ANTI_IL12_ACT_CD4_TCELL_UP;GSE17974_CTRL_VS_ACT_IL4_AND_ANTI_IL12_1H_CD4_TCELL_DN;GSE39820_CTRL_VS_TGFBETA1_IL6_IL23A_CD4_TCELL_DN;GSE39820_CTRL_VS_TGFBETA3_IL6_IL23A_CD4_TCELL_DN;GSE7460_CD8_TCELL_VS_TREG_ACT_DN;GSE9037_WT_VS_IRA…	Activator;Alternativesplicing;Completeproteome;Nucleus;Phosphoprotein;Referenceproteome;Transcription;Transcriptionregulation	Mediator complex;TRAP-SMCC mediator complex	ERK1,2 kinase substrate motif;G protein-coupled receptor kinase 1 substrate motif;GSK-3, ERK1, ERK2, CDK5 substrate motif;PKA kinase substrate motif;PKC kinase substrate motif;WW domain binding motif	+	HTP	1	4.82166e-82	190.79	186.98	136.49	-0.34554	2125200000	1429700000	695500000	226	77.632
NaN	2.78183	NaN	2.4071	NaN	NaN	3.17387	3.07841	1.62404	NaN	2.23725	2.44041	3.0357	2.86262	1.87746	NaN	NaN	NaN	0.736802	2.78183	2.44041	-0.341421	0.214596	S	2	___1							DUF3496	CAMPS_COLON_CANCER_COPY_NUMBER_UP;chr17p11;GOZGIT_ESR1_TARGETS_DN;GSE10463_CD40L_AND_VA347_VS_CD40L_IN_DC_DN;GSE18791_CTRL_VS_NEWCASTLE_VIRUS_DC_1H_DN;GSE22886_IGM_MEMORY_BCELL_VS_BLOOD_PLASMA_CELL_UP;GSE26928_EFF_MEMORY_VS_CXCR5_POS_CD4_TCELL_DN;GSE360_DC_VS_MAC_L_MAJOR_DN;GSE360_L_DONOVANI_VS_L_MAJOR_MAC_DN;GSE3982_CTRL_VS_PMA_STIM_EOSINOPHIL_DN;GSE3982_EOSINOPHIL_VS_NKCELL_DN;GSE8515_IL1_VS_IL…	Alternativesplicing;Coiledcoil;Completeproteome;Isopeptidebond;Referenceproteome;Ublconjugation		Casein kinase I substrate motif;PKA kinase substrate motif	+	CST;HTP	0.999584	0.00540584	86.67	63.147	86.67	-0.15065	33162000	28559000	4602500	NaN	33.8035
-0.467755	0.396952	0.125595	0.0285701	0.0866906	-0.500001	-0.252442	0.457923	NaN	0.375128	-0.103483	0.00522178	-0.776049	-0.548003	0.310079	0.373894	-0.183723	-0.394463	0.643971	0.0576303	-0.103483	-0.161113	0.384931	S	2	___1	biological regulation;regulation of biological process;regulation of biosynthetic process;regulation of cellular biosynthetic process;regulation of cellular macromolecule biosynthetic process;regulation of cellular metabolic process;regulation of cellular process;regulation of gene expression;regulation of macromolecule biosynthetic process;regulation of macromolecule metabolic process;regulation…			biological regulation			Helicase_C_4	BUYTAERT_PHOTODYNAMIC_THERAPY_STRESS_UP;BYSTRYKH_HEMATOPOIESIS_STEM_CELL_AND_BRAIN_QTL_TRANS;chr12q24;DORSAM_HOXA9_TARGETS_DN;DOUGLAS_BMI1_TARGETS_UP;GSE12845_IGD_POS_BLOOD_VS_NAIVE_TONSIL_BCELL_DN;GSE13484_3H_UNSTIM_VS_YF17D_VACCINE_STIM_PBMC_DN;GSE14308_TH2_VS_NAIVE_CD4_TCELL_DN;GSE14769_20MIN_VS_360MIN_LPS_BMDM_DN;GSE17721_PAM3CSK4_VS_GADIQUIMOD_16H_BMDM_UP;GSE17721_POLYIC_VS_PAM3CSK4_4H_BMDM_…	Acetylation;Alternativesplicing;Coiledcoil;Completeproteome;Phosphoprotein;Polymorphism;Referenceproteome		14-3-3 domain binding motif;Akt kinase substrate motif;AMP-activated protein kinase 2 substrate motif;Calmodulin-dependent protein kinase II substrate motif;Casein kinase II substrate motif;ERK1,2 kinase substrate motif;GSK-3, ERK1, ERK2, CDK5 substrate motif;MAPKAPK1 kinase substrate motif;PKA kinase substrate motif;PKC kinase substrate motif;WW domain binding motif	+	HTP	0.999408	0.00385439	95.608	85.301	93.098	-0.01852	58247000	36290000	21957000	212	32.3816
NaN	1.00815	NaN	0.247168	1.19389	-0.0108075	0.640648	NaN	NaN	0.715432	NaN	0.545213	NaN	1.1366	NaN	0.346602	0.701061	NaN	0.787595	0.640648	0.701061	0.0604125	0.378744	S	2	___1	biological regulation;regulation of biological process;regulation of biosynthetic process;regulation of cellular biosynthetic process;regulation of cellular macromolecule biosynthetic process;regulation of cellular metabolic process;regulation of cellular process;regulation of gene expression;regulation of macromolecule biosynthetic process;regulation of macromolecule metabolic process;regulation…			biological regulation			Helicase_C_4	BUYTAERT_PHOTODYNAMIC_THERAPY_STRESS_UP;BYSTRYKH_HEMATOPOIESIS_STEM_CELL_AND_BRAIN_QTL_TRANS;chr12q24;DORSAM_HOXA9_TARGETS_DN;DOUGLAS_BMI1_TARGETS_UP;GSE12845_IGD_POS_BLOOD_VS_NAIVE_TONSIL_BCELL_DN;GSE13484_3H_UNSTIM_VS_YF17D_VACCINE_STIM_PBMC_DN;GSE14308_TH2_VS_NAIVE_CD4_TCELL_DN;GSE14769_20MIN_VS_360MIN_LPS_BMDM_DN;GSE17721_PAM3CSK4_VS_GADIQUIMOD_16H_BMDM_UP;GSE17721_POLYIC_VS_PAM3CSK4_4H_BMDM_…	Acetylation;Alternativesplicing;Coiledcoil;Completeproteome;Phosphoprotein;Polymorphism;Referenceproteome		Phosphorylase kinase substrate motif;Pim1 kinase substrate sequence;PKA kinase substrate motif;PKC kinase substrate motif	+	CST;HTP	0.997107	4.43995e-23	119.76	119.76	66.017	-0.37627	33774000	23740000	10034000	792	25.3916
NaN	0.945838	-0.126421	0.0247826	-1.05629	-0.688183	NaN	NaN	-0.24498	0.77022	1.16682	1.15691	0.45095	1.7198	0.704268	0.14957	0.449089	-1.01474	0.0553659	-0.185701	0.704268	0.889968	0.00579342	S	2	___1			cell part;membrane		cell part;membrane		HOOK	AGCGCAG,MIR-191;AGGGCAG,MIR-18A;CAGGTG_V$E12_Q6;chr11q13;CTGAGCC,MIR-24;GAGCCAG,MIR-149;GAGCTGG,MIR-337;GGCAGAC,MIR-346;GGCAGCT,MIR-22;GGGGCCC,MIR-296;GGTGAAG,MIR-412;GSE10239_MEMORY_VS_DAY4.5_EFF_CD8_TCELL_UP;GSE10239_NAIVE_VS_DAY4.5_EFF_CD8_TCELL_UP;GSE11924_TFH_VS_TH2_CD4_TCELL_UP;GSE13229_IMM_VS_INTMATURE_NKCELL_DN;GSE13229_IMM_VS_MATURE_NKCELL_DN;GSE14308_TH17_VS_INDUCED_TREG_DN;GSE14308_TH2…	Alternativesplicing;Coiledcoil;Completeproteome;Phosphoprotein;Polymorphism;Referenceproteome		14-3-3 domain binding motif;AMP-activated protein kinase substrate motif;Calmodulin-dependent protein kinase I substrate motif;Calmodulin-dependent protein kinase II substrate motif;Calmodulin-dependent protein kinase IV substrate motif;Chk1 kinase substrate motif;PKA kinase substrate motif;PKC kinase substrate motif;ZIP kinase substrate motif	+	CST	0.996778	4.13232e-17	124.69	95.943	73.885	-0.43142	138620000	77295000	61328000	1379	24.9044
-0.781511	0.665367	0.281259	0.486458	-1.48649	NaN	NaN	1.46444	NaN	-0.269689	0.75663	0.721258	NaN	2.16623	0.682743	-0.263519	-0.21887	-0.0173597	0.533052	0.383859	0.332692	-0.0511671	0.495709	S	2	___1			cell part;membrane		cell part;membrane		HOOK	AGCGCAG,MIR-191;AGGGCAG,MIR-18A;CAGGTG_V$E12_Q6;chr11q13;CTGAGCC,MIR-24;GAGCCAG,MIR-149;GAGCTGG,MIR-337;GGCAGAC,MIR-346;GGCAGCT,MIR-22;GGGGCCC,MIR-296;GGTGAAG,MIR-412;GSE10239_MEMORY_VS_DAY4.5_EFF_CD8_TCELL_UP;GSE10239_NAIVE_VS_DAY4.5_EFF_CD8_TCELL_UP;GSE11924_TFH_VS_TH2_CD4_TCELL_UP;GSE13229_IMM_VS_INTMATURE_NKCELL_DN;GSE13229_IMM_VS_MATURE_NKCELL_DN;GSE14308_TH17_VS_INDUCED_TREG_DN;GSE14308_TH2…	Alternativesplicing;Coiledcoil;Completeproteome;Phosphoprotein;Polymorphism;Referenceproteome		14-3-3 domain binding motif;Aurora-A kinase substrate motif;Calmodulin-dependent protein kinase II substrate motif;Casein kinase II substrate motif;G protein-coupled receptor kinase 1 substrate motif;MDC1 BRCT domain binding motif;PAK2 kinase substrate motif;Phosphorylase kinase substrate motif;PKA kinase substrate motif;PKC epsilon kinase substrate motif;PKC kinase substrate motif;Plk1 PBD domai…	+	CST	0.951075	1.2507e-52	182.32	172.57	182.32	-0.015669	465970000	366050000	99922000	597	12.8888
-0.186071	-0.442148	-1.63715	-0.90702	-0.0887177	0.185311	0.245827	NaN	-0.145054	0.485471	NaN	NaN	0.344266	-0.316677	0.332798	0.0855234	-0.147888	-0.110792	0.0887065	-0.165562	0.0855234	0.251086	0.206662	S	2	___1	biological regulation;biosynthetic process;cellular biosynthetic process;cellular macromolecule biosynthetic process;cellular macromolecule metabolic process;cellular metabolic process;cellular nitrogen compound metabolic process;cellular process;macromolecule biosynthetic process;macromolecule metabolic process;metabolic process;nitrogen compound metabolic process;nucleic acid metabolic process;…	binding;cation binding;DNA binding;ion binding;metal ion binding;nucleic acid binding	cell part;intracellular membrane-bounded organelle;intracellular organelle;intracellular part;membrane-bounded organelle;nucleus;organelle	biological regulation;biosynthetic process;cellular metabolic process;cellular nitrogen compound metabolic process;cellular process;macromolecule metabolic process;metabolic process;nitrogen compound metabolic process;nucleobase-containing compound metabolic process;primary metabolic process;RNA metabolic process	cell part;intracellular membrane-bounded organelle;intracellular organelle;nucleus;organelle		KRAB;zf-C2H2	chr7p22;CHYLA_CBFA2T3_TARGETS_DN;CRX_NRL_DN.V1_DN;GINESTIER_BREAST_CANCER_20Q13_AMPLIFICATION_DN;GINESTIER_BREAST_CANCER_ZNF217_AMPLIFIED_DN;GSE15659_CD45RA_NEG_CD4_TCELL_VS_ACTIVATED_TREG_DN;GSE15659_CD45RA_NEG_CD4_TCELL_VS_NONSUPPRESSIVE_TCELL_DN;NRL_DN.V1_DN;OSMAN_BLADDER_CANCER_UP	Acetylation;Completeproteome;DNA-binding;Metal-binding;Nucleus;Phosphoprotein;Referenceproteome;Repeat;Transcription;Transcriptionregulation;Zinc;Zinc-finger		b-Adrenergic Receptor kinase substrate motif;ERK1,2 kinase substrate motif;GSK-3, ERK1, ERK2, CDK5 substrate motif;WW domain binding motif	+	HTP	0.999804	6.1727e-81	221.01	201.99	199.61	0.30302	187990000	119630000	68358000	10	37.1889
0.26134	0.0695092	-0.789014	-0.106235	0.305891	0.377006	0.199614	NaN	-0.0694414	0.711011	0.352201	-0.169357	0.367162	0.225852	-0.0215927	0.200384	-0.367173	0.584353	0.327795	0.134561	0.225852	0.0912907	0.347805	S	3	___1	biological regulation;biosynthetic process;cellular biosynthetic process;cellular macromolecule biosynthetic process;cellular macromolecule metabolic process;cellular metabolic process;cellular nitrogen compound metabolic process;cellular process;macromolecule biosynthetic process;macromolecule metabolic process;metabolic process;nitrogen compound metabolic process;nucleic acid metabolic process;…	binding;cation binding;DNA binding;ion binding;metal ion binding;nucleic acid binding	cell part;intracellular membrane-bounded organelle;intracellular organelle;intracellular part;membrane-bounded organelle;nucleus;organelle	biological regulation;biosynthetic process;cellular metabolic process;cellular nitrogen compound metabolic process;cellular process;macromolecule metabolic process;metabolic process;nitrogen compound metabolic process;nucleobase-containing compound metabolic process;primary metabolic process;RNA metabolic process	cell part;intracellular membrane-bounded organelle;intracellular organelle;nucleus;organelle		KRAB;zf-C2H2	chr7p22;CHYLA_CBFA2T3_TARGETS_DN;CRX_NRL_DN.V1_DN;GINESTIER_BREAST_CANCER_20Q13_AMPLIFICATION_DN;GINESTIER_BREAST_CANCER_ZNF217_AMPLIFIED_DN;GSE15659_CD45RA_NEG_CD4_TCELL_VS_ACTIVATED_TREG_DN;GSE15659_CD45RA_NEG_CD4_TCELL_VS_NONSUPPRESSIVE_TCELL_DN;NRL_DN.V1_DN;OSMAN_BLADDER_CANCER_UP	Acetylation;Completeproteome;DNA-binding;Metal-binding;Nucleus;Phosphoprotein;Referenceproteome;Repeat;Transcription;Transcriptionregulation;Zinc;Zinc-finger		Casein kinase I substrate motif;ERK1,2 kinase substrate motif;Growth associated histone HI kinase substrate motif;GSK-3, ERK1, ERK2, CDK5 substrate motif;WW domain binding motif	+	CST;HTP	1	8.25602e-32	171.78	152.15	81.346	-0.07144	237690000	158700000	78993000	112	81.346
-3.96088	-5.88339	-4.66887	-5.22377	-2.8449	-5.45406	-4.08833	-4.94301	-1.85717	-4.91981	-3.52503	-4.85548	-5.24282	-6.2254	-6.2156	-5.8474	-5.20812	-3.80017	0.174131	-4.66887	-5.20812	-0.539249	0.0906133	S	2	___1	anatomical structure development;biological adhesion;biological regulation;biosynthetic process;cartilage condensation;cell adhesion;cell differentiation;cell proliferation;cell-cell adhesion;cellular biosynthetic process;cellular developmental process;cellular macromolecule biosynthetic process;cellular macromolecule metabolic process;cellular metabolic process;cellular nitrogen compound metabol…	binding;DNA binding;nucleic acid binding;sequence-specific DNA binding	cell part;intracellular membrane-bounded organelle;intracellular organelle;intracellular part;membrane-bounded organelle;nucleus;organelle	anatomical structure development;biological adhesion;biological regulation;biosynthetic process;cell adhesion;cell differentiation;cell proliferation;cellular metabolic process;cellular nitrogen compound metabolic process;cellular process;developmental process;macromolecule metabolic process;metabolic process;nitrogen compound metabolic process;nucleobase-containing compound metabolic process;pri…	cell part;intracellular membrane-bounded organelle;intracellular organelle;nucleus;organelle		Homeobox	AFFAR_YY1_TARGETS_UP;BAKKER_FOXO3_TARGETS_UP;BRUINS_UVC_RESPONSE_VIA_TP53_GROUP_A;chr7p22;GSE17721_CTRL_VS_PAM3CSK4_1H_BMDM_DN;GSE27786_LSK_VS_ERYTHROBLAST_DN;GSE5960_TH1_VS_ANERGIC_TH1_UP;MANTOVANI_VIRAL_GPCR_SIGNALING_DN;MARTENS_TRETINOIN_RESPONSE_DN;MARTORIATI_MDM4_TARGETS_NEUROEPITHELIUM_DN;MEISSNER_BRAIN_HCP_WITH_H3K27ME3;MEISSNER_NPC_HCP_WITH_H3K4ME2_AND_H3K27ME3;MIKKELSEN_IPS_WITH_HCP_H3K2…	Completeproteome;Developmentalprotein;Differentiation;DNA-binding;Homeobox;Neurogenesis;Nucleus;Referenceproteome;Transcription;Transcriptionregulation		ERK1,2 kinase substrate motif;Growth associated histone HI kinase substrate motif;GSK-3, ERK1, ERK2, CDK5 substrate motif;PKA kinase substrate motif;PKC kinase substrate motif;WW domain binding motif	+	HTP	1	2.91688e-41	172.52	152.73	129.27	-0.26454	744500000	55644000	688850000	443	129.269
1.90921	1.03347	0.967341	0.733191	0.347964	-0.230977	NaN	1.52816	0.912328	-0.302215	NaN	0.325843	0.271988	0.85734	0.439298	0.474079	1.09787	1.49789	0.316035	0.939835	0.456688	-0.483146	0.118597	S	2	___1	adaptive immune response;adaptive immune response based on somatic recombination of immune receptors built from immunoglobulin superfamily domains;biological adhesion;cell adhesion;cell gliding;cell migration;cell motility;cell-substrate adhesion;cellular component movement;cellular process;establishment of localization;establishment of localization in cell;exocytosis;immune effector process;immu…	adenyl nucleotide binding;adenyl ribonucleotide binding;ATP binding;binding;catalytic activity;hydrolase activity;hydrolase activity, acting on acid anhydrides;hydrolase activity, acting on acid anhydrides, in phosphorus-containing anhydrides;lipid binding;motor activity;nucleoside-triphosphatase activity;nucleotide binding;phosphatidylinositol binding;phosphatidylinositol-3,4,5-trisphosphate bin…	cell part;cell projection;cytoskeletal part;extracellular membrane-bounded organelle;extracellular organelle;extracellular region part;extracellular vesicular exosome;filopodium;intracellular organelle part;intracellular part;lamellipodium;leading edge membrane;macromolecular complex;membrane;membrane part;membrane-bounded organelle;membrane-bounded vesicle;microvillus;myosin complex;organelle;or…	biological adhesion;cell adhesion;cell motility;cellular component movement;cellular process;establishment of localization;exocytosis;immune system process;locomotion;response to stimulus;secretion;transport;vesicle-mediated transport	cell part;cell projection;extracellular organelle;filopodium;macromolecular complex;membrane;microvillus;organelle;plasma membrane;protein complex;vesicle		Myosin_head;Myosin_TH1	AKT_UP_MTOR_DN.V1_DN;BOSCO_INTERFERON_INDUCED_ANTIVIRAL_MODULE;chr7p13;FULCHER_INFLAMMATORY_RESPONSE_LECTIN_VS_LPS_DN;GOBERT_OLIGODENDROCYTE_DIFFERENTIATION_DN;GSE13306_RA_VS_UNTREATED_MEM_CD4_TCELL_DN;GSE17974_0H_VS_12H_IN_VITRO_ACT_CD4_TCELL_UP;GSE17974_0H_VS_4H_IN_VITRO_ACT_CD4_TCELL_UP;GSE17974_0H_VS_6H_IN_VITRO_ACT_CD4_TCELL_UP;GSE17974_CTRL_VS_ACT_IL4_AND_ANTI_IL12_12H_CD4_TCELL_UP;GSE17974…	Actin-binding;Adaptiveimmunity;Alternativesplicing;ATP-binding;Calmodulin-binding;Cellmembrane;Cellprojection;Completeproteome;Directproteinsequencing;Immunity;Lipid-binding;Membrane;Motorprotein;Myosin;Nucleotide-binding;Polymorphism;Referenceproteome		Casein kinase II substrate motif;PKA kinase substrate motif;PKC kinase substrate motif	+	CST;HTP	0.99608	6.28566e-05	100.38	88.221	100.38	0.39244	54129000	38902000	15227000	1010	24.0504
-1.41487	-1.59702	-0.53664	-1.73953	-1.1467	-0.437846	-1.18863	-1.48994	-1.68042	-0.880397	-1.22789	-1.39032	-1.06887	-1.12311	-1.13186	-0.703435	-0.694636	-1.59008	0.413935	-1.41487	-1.12311	0.291764	0.177039	S	3	___1							FAM195	chr17p13;GCM_NF2;GSE17721_ALL_VS_24H_PAM3CSK4_BMDM_UP;GSE17721_CTRL_VS_PAM3CSK4_8H_BMDM_UP;GSE17721_CTRL_VS_POLYIC_2H_BMDM_UP;GSE17721_PAM3CSK4_VS_GADIQUIMOD_4H_BMDM_DN;GSE39820_CTRL_VS_TGFBETA3_IL6_IL23A_CD4_TCELL_DN;JIANG_HYPOXIA_CANCER;LASTOWSKA_NEUROBLASTOMA_COPY_NUMBER_UP;MCCABE_BOUND_BY_HOXC6	Acetylation;Completeproteome;Phosphoprotein;Referenceproteome		Casein kinase II substrate motif;ERK1,2 kinase substrate motif;G protein-coupled receptor kinase 1 substrate motif;Growth associated histone HI kinase substrate motif;GSK3 kinase substrate motif;GSK-3, ERK1, ERK2, CDK5 substrate motif;MAPKAPK2 kinase substrate motif;WW domain binding motif	+	CST;HTP	0.999266	1.13368e-27	134.87	132.18	134.87	0.029595	253050000	119130000	133920000	21	31.5606
-2.06044	-1.14342	-0.867306	-0.947723	-1.10093	-1.68714	NaN	-1.34262	-2.34451	-1.50161	-1.68352	-1.30785	-1.34606	-1.03246	-1.47206	-1.37103	-1.16226	-2.32352	0.897647	-1.24302	-1.37103	-0.128013	0.420299	S	3	___1	anatomical structure development;anatomical structure morphogenesis;biological regulation;biosynthetic process;cardiac chamber development;cardiac ventricle development;cellular biosynthetic process;cellular macromolecule biosynthetic process;cellular macromolecule metabolic process;cellular metabolic process;cellular nitrogen compound metabolic process;cellular process;cellular protein metabolic…	binding;DNA binding;nucleic acid binding;protein binding;protein binding transcription factor activity;TBP-class protein binding;transcription coactivator activity;transcription cofactor activity;transcription factor binding;transcription factor binding transcription factor activity	cell part;cytoplasm;cytoplasmic part;extracellular membrane-bounded organelle;extracellular organelle;extracellular region part;extracellular vesicular exosome;intracellular membrane-bounded organelle;intracellular organelle;intracellular part;macromolecular complex;membrane-bounded organelle;membrane-bounded vesicle;nascent polypeptide-associated complex;nucleus;organelle;protein complex;vesicle	anatomical structure development;anatomical structure morphogenesis;biological regulation;biosynthetic process;cellular metabolic process;cellular nitrogen compound metabolic process;cellular process;developmental process;establishment of localization;growth;macromolecule metabolic process;metabolic process;nitrogen compound metabolic process;nucleobase-containing compound metabolic process;prima…	cell part;cytoplasm;extracellular organelle;intracellular membrane-bounded organelle;intracellular organelle;macromolecular complex;nucleus;organelle;protein complex;vesicle		NAC	BENPORATH_MYC_MAX_TARGETS;BIOSYNTHETIC_PROCESS;BOUDOUKHA_BOUND_BY_IGF2BP2;CAGCTG_V$AP4_Q5;CAGGTG_V$E12_Q6;CASORELLI_ACUTE_PROMYELOCYTIC_LEUKEMIA_UP;CELLULAR_BIOSYNTHETIC_PROCESS;CELLULAR_MACROMOLECULE_METABOLIC_PROCESS;CELLULAR_PROTEIN_METABOLIC_PROCESS;CHARAFE_BREAST_CANCER_LUMINAL_VS_BASAL_UP;chr12q23;CYTOPLASM;CYTOPLASMIC_PART;DANG_BOUND_BY_MYC;FEVR_CTNNB1_TARGETS_DN;FLECHNER_BIOPSY_KIDNEY_TRA…	3D-structure;Acetylation;Activator;Allergen;Alternativesplicing;Chaperone;Completeproteome;Cytoplasm;Directproteinsequencing;DNA-binding;Host-virusinteraction;Nucleus;Phosphoprotein;Polymorphism;Proteintransport;Referenceproteome;Repeat;Transcription;Transcriptionregulation;Transport		b-Adrenergic Receptor kinase substrate motif;BARD1 BRCT domain binding motif;Casein kinase II substrate motif;G protein-coupled receptor kinase 1 substrate motif	+	CST;HTP	0.999996	8.75254e-143	223.29	216.25	223.29	0.56987	1860400000	842320000	1018100000	166	54.8972
-1.2155	1.47788	0.794269	0.994147	-0.708751	2.497	-0.35207	1.81104	0.540722	-1.74019	2.16355	-0.511584	-0.00848814	0.240025	1.43177	-0.00311795	2.53732	NaN	0.838454	0.794269	0.118454	-0.675816	0.0432466	S	2	___1	biological regulation;establishment of localization;gas transport;metabolic process;oxidation-reduction process;oxygen transport;regulation of biological process;regulation of cellular process;regulation of response to stimulus;regulation of signal transduction;regulation of signaling;response to chemical stimulus;response to oxidative stress;response to stimulus;response to stress;transport	antioxidant activity;catalytic activity;oxidoreductase activity;oxidoreductase activity, acting on peroxide as acceptor;oxygen transporter activity;peroxidase activity;substrate-specific transporter activity;transporter activity	cell part;cytoplasm;intracellular part;membrane;plasma membrane	biological regulation;establishment of localization;gas transport;metabolic process;response to chemical stimulus;response to oxidative stress;response to stimulus;response to stress;transport	cell part;cytoplasm;membrane;plasma membrane		CRIC_ras_sig;DUF1170;PDZ;PH;SAM_1	ACEVEDO_LIVER_CANCER_WITH_H3K27ME3_UP;ACEVEDO_LIVER_CANCER_WITH_H3K9ME3_UP;ACTGAAA,MIR-30A-3P,MIR-30E-3P;ANTIOXIDANT_ACTIVITY;BHAT_ESR1_TARGETS_NOT_VIA_AKT1_UP;BHAT_ESR1_TARGETS_VIA_AKT1_UP;BOYLAN_MULTIPLE_MYELOMA_D_DN;BOYLAN_MULTIPLE_MYELOMA_PCA3_DN;CAGCTG_V$AP4_Q5;CHARAFE_BREAST_CANCER_BASAL_VS_MESENCHYMAL_DN;CHEMNITZ_RESPONSE_TO_PROSTAGLANDIN_E2_DN;CHICAS_RB1_TARGETS_CONFLUENT;chr6q25;CORRE_MU…	Alternativesplicing;Cellmembrane;Completeproteome;Cytoplasm;Membrane;Polymorphism;Proteomicsidentification;Referenceproteome		ERK1,2 kinase substrate motif;GSK-3, ERK1, ERK2, CDK5 substrate motif;PKA kinase substrate motif;PKC kinase substrate motif;WW domain binding motif	+	HTP	0.999999	2.31195e-10	79.467	79.467	79.467	0.30124	140090000	103830000	36264000	804	61.1503
-0.562741	2.89419	1.1184	1.53669	2.06683	1.59668	1.32462	2.57536	-0.392146	0.836695	2.19452	NaN	NaN	0.863696	2.04335	2.20977	2.44481	-0.26732	0.824591	1.53669	2.04335	0.506653	0.0667208	S	2	___1			cell part;integral to membrane;intrinsic to membrane;membrane part		cell part				Completeproteome;Membrane;Phosphoprotein;Referenceproteome;Transmembrane;Transmembranehelix		14-3-3 domain binding motif;Calmodulin-dependent protein kinase II substrate motif;Calmodulin-dependent protein kinase IV substrate motif;Chk1 kinase substrate motif;CLK1 kinase substrate motif;G protein-coupled receptor kinase 1 substrate motif;GSK3 kinase substrate motif;PAK2 kinase substrate motif;Pim1 kinase substrate sequence;PKA kinase substrate motif;PKC epsilon kinase substrate motif;PKC …			1	0.000101337	119.86	17.862	111.39	-1.0708	327690000	274580000	53112000	263	111.392
-0.276048	1.9627	0.64563	1.14074	1.16898	0.227023	-0.13319	1.17414	-0.942883	-0.134059	NaN	0.625262	-0.559003	1.0998	1.34856	1.63452	1.06005	0.609015	0.698226	0.64563	0.842656	0.197026	0.250261	S	2	___1			cell part;integral to membrane;intrinsic to membrane;membrane part		cell part				Completeproteome;Membrane;Phosphoprotein;Referenceproteome;Transmembrane;Transmembranehelix		14-3-3 domain binding motif;Aurora-A kinase substrate motif;Calmodulin-dependent protein kinase II substrate motif;G protein-coupled receptor kinase 1 substrate motif;GSK3 kinase substrate motif;PAK2 kinase substrate motif;Phosphorylase kinase substrate motif;PKA kinase substrate motif;PKC epsilon kinase substrate motif;PKC kinase substrate motif	+	HTP	0.999993	7.3716e-61	185.06	185.06	126.27	0.8629	881350000	678730000	202620000	94	51.3942
-0.0534068	1.30588	0.783536	0.869921	0.672396	NaN	-0.298859	1.0553	NaN	-0.00793367	0.397412	0.849761	-0.704025	0.596751	0.823468	2.04578	NaN	1.17932	0.938994	0.783536	0.71011	-0.0734267	0.479918	S	2	___1			cell part;integral to membrane;intrinsic to membrane;membrane part		cell part				Completeproteome;Membrane;Phosphoprotein;Referenceproteome;Transmembrane;Transmembranehelix		14-3-3 domain binding motif;Calmodulin-dependent protein kinase II substrate motif;Casein kinase II substrate motif;G protein-coupled receptor kinase 1 substrate motif;GSK3 kinase substrate motif;PKA kinase substrate motif;PKC kinase substrate motif			0.993341	4.47042e-11	137.95	110.52	126.83	-1.1781	175440000	129910000	45526000	85	22.239
-0.16436	1.58251	0.75775	0.855245	1.37232	0.228745	0.191722	1.59498	NaN	-0.199272	1.99859	0.91944	-0.329125	0.892662	1.11942	1.63411	0.819355	0.797507	0.8917	0.806498	0.892662	0.0861641	0.352878	S	2	___1			cell part;integral to membrane;intrinsic to membrane;membrane part		cell part				Completeproteome;Membrane;Phosphoprotein;Referenceproteome;Transmembrane;Transmembranehelix		14-3-3 domain binding motif;Akt kinase substrate motif;Calmodulin-dependent protein kinase II substrate motif;G protein-coupled receptor kinase 1 substrate motif;GSK3 kinase substrate motif;MAPKAPK1 kinase substrate motif;p70 Ribosomal S6 kinase substrate motif;Phosphorylase kinase substrate motif;PKA kinase substrate motif;PKC kinase substrate motif			0.99984	1.5421e-18	151.73	127.25	71.632	0.047356	466840000	347620000	119210000	155	38.2084
-0.604528	-0.249803	-0.147832	-0.121565	-0.968865	NaN	NaN	NaN	-0.172984	-0.393249	NaN	-0.384855	-0.510873	0.176667	NaN	NaN	0.268445	0.145216	0.218095	-0.211393	-0.119819	0.0915737	0.347525	S	2	___1	amine transport;biological regulation;cellular component assembly;cellular component assembly at cellular level;cellular component organization;cellular component organization at cellular level;cellular component organization or biogenesis;cellular component organization or biogenesis at cellular level;cellular macromolecular complex assembly;cellular macromolecular complex subunit organization;c…	binding;protein binding;SNAP receptor activity;SNARE binding;syntaxin binding	adherens junction;anchoring junction;azurophil granule;cell junction;cell part;cell projection;cell-substrate adherens junction;cell-substrate junction;cytoplasm;cytoplasmic membrane-bounded vesicle;cytoplasmic part;cytoplasmic vesicle;extracellular membrane-bounded organelle;extracellular organelle;extracellular region part;extracellular vesicular exosome;focal adhesion;intracellular membrane-bo…	amine transport;biological regulation;cellular component assembly;cellular component organization;cellular macromolecular complex assembly;cellular membrane organization;cellular process;establishment of localization;Golgi vesicle transport;hormone transport;macromolecular complex assembly;membrane fusion;membrane organization;organelle fusion;organelle organization;protein complex assembly;prote…	cell part;cell projection;cytoplasm;cytoplasmic membrane-bounded vesicle;extracellular organelle;intracellular membrane-bounded organelle;intracellular organelle;lysosome;macromolecular complex;membrane;neuron projection;nucleoplasm;organelle;plasma membrane;protein complex;synapse;vacuole;vesicle	SNARE interactions in vesicular transport	SNAP-25;SNARE	BRUINS_UVC_RESPONSE_EARLY_LATE;BRUNO_HEMATOPOIESIS;BUYTAERT_PHOTODYNAMIC_THERAPY_STRESS_UP;BYSTRYKH_HEMATOPOIESIS_STEM_CELL_QTL_TRANS;CELLULAR_LOCALIZATION;chr15q14;CHUNG_BLISTER_CYTOTOXICITY_DN;CROONQUIST_NRAS_VS_STROMAL_STIMULATION_UP;CUI_TCF21_TARGETS_2_DN;CYTOSKELETON_ORGANIZATION_AND_BIOGENESIS;DIAZ_CHRONIC_MEYLOGENOUS_LEUKEMIA_UP;ESTABLISHMENT_OF_CELLULAR_LOCALIZATION;ESTABLISHMENT_OF_LOCAL…	3D-structure;Acetylation;Alternativesplicing;Celljunction;Cellmembrane;Coiledcoil;Completeproteome;Directproteinsequencing;Lipoprotein;Membrane;Palmitate;Phosphoprotein;Proteintransport;Referenceproteome;Repeat;Synapse;Synaptosome;Transport	SNARE complex (SNAP23, STX1A);SNARE complex (STX11, VAMP2, SNAP23);SNARE complex (STX2, SNAP23);SNARE complex (STX4, SNAP23);SNARE complex (STX4, SNAP23, VAMP1);SNARE complex (STX4, SNAP23, VAMP2);SNARE complex (STX4, VAMP8, VAMP3, SNAP23);SNARE complex (STX6, SNAP23)	ERK1,2 kinase substrate motif;GSK-3, ERK1, ERK2, CDK5 substrate motif;WW domain binding motif	+	CST;HTP	0.999974	5.9797e-17	124.19	111.3	124.19	0.27739	96352000	61753000	34599000	110	45.9227
-0.777783	0.302061	0.249045	0.28257	-0.296498	-0.114074	0.394595	0.748864	-1.04585	0.273444	0.594621	0.242297	0.0237903	0.557503	0.467874	0.607067	0.612314	-0.567305	0.167509	0.249045	0.467874	0.218828	0.232115	S	2	___1							SMAP		Acetylation;Completeproteome;Phosphoprotein;Referenceproteome		14-3-3 domain binding motif;Calmodulin-dependent protein kinase II substrate motif;Calmodulin-dependent protein kinase IV substrate motif;Casein kinase II substrate motif;Chk1 kinase substrate motif;ERK1,2 kinase substrate motif;GSK-3, ERK1, ERK2, CDK5 substrate motif;PKA kinase substrate motif;PKC kinase substrate motif;Pyruvate dehydrogenase kinase substrate motif;WW domain binding motif	+	CST;HTP	0.999998	9.01489e-190	285.16	280.36	96.068	-1.7241	6171500000	4195300000	1976200000	17	59.133
0.384003	NaN	NaN	0.4989	0.0727937	0.00129734	-0.624363	NaN	0.512144	-0.121458	0.16951	0.0341729	NaN	-0.0211566	NaN	-0.178267	-0.0789962	NaN	0.382328	0.228399	-0.0500764	-0.278475	0.268711	S	3	___1	anterograde axon cargo transport;anterograde synaptic vesicle transport;antigen processing and presentation;antigen processing and presentation of exogenous antigen;antigen processing and presentation of lipid antigen via MHC class Ib;antigen processing and presentation via MHC class Ib;antigen processing and presentation, exogenous lipid antigen via MHC class Ib;axon cargo transport;biological r…	binding;enzyme binding;GTP-dependent protein binding;phosphatase binding;protein binding;protein phosphatase binding	AP-3 adaptor complex;AP-type membrane coat adaptor complex;cell part;clathrin coated vesicle membrane;coated vesicle membrane;cytoplasmic part;cytoplasmic vesicle membrane;cytoplasmic vesicle part;Golgi apparatus;intracellular membrane-bounded organelle;intracellular organelle;intracellular organelle part;intracellular part;lysosomal membrane;macromolecular complex;membrane;membrane part;membrane…	biological regulation;cellular component movement;cellular component organization;cellular process;coagulation;cytoskeleton-dependent intracellular transport;establishment of localization;immune system process;multicellular organismal process;organelle organization;pigment granule organization;protein targeting;protein transport;regulation of body fluid levels;transport;vacuolar transport;vesicle…	AP-type membrane coat adaptor complex;cell part;Golgi apparatus;intracellular membrane-bounded organelle;intracellular organelle;macromolecular complex;membrane;organelle;protein complex	Lysosome	Adaptin_N;AP3B1_C;SEEEED	ACCAAAG,MIR-9;ACEVEDO_LIVER_TUMOR_VS_NORMAL_ADJACENT_TISSUE_UP;ATCATGA,MIR-433;BAELDE_DIABETIC_NEPHROPATHY_DN;BENPORATH_NANOG_TARGETS;BENPORATH_SOX2_TARGETS;BORCZUK_MALIGNANT_MESOTHELIOMA_UP;CELLULAR_LOCALIZATION;chr5q14;CYCLIN_D1_UP.V1_DN;CYTOPLASM;CYTOPLASMIC_PART;DACOSTA_UV_RESPONSE_VIA_ERCC3_DN;DIAZ_CHRONIC_MEYLOGENOUS_LEUKEMIA_UP;ESTABLISHMENT_OF_CELLULAR_LOCALIZATION;ESTABLISHMENT_OF_LOCALI…	Albinism;Alternativesplicing;Completeproteome;Cytoplasmicvesicle;Diseasemutation;Golgiapparatus;Hermansky-Pudlaksyndrome;Membrane;Phosphoprotein;Proteintransport;Referenceproteome;Transport	AP3 adapter complex;AP3-BLOC1 complex	b-Adrenergic Receptor kinase substrate motif;Casein kinase II substrate motif;Pyruvate dehydrogenase kinase substrate motif	+	CST;HTP	1	3.68281e-31	123.35	123.35	123.35	0.44381	195370000	113970000	81401000	227	76.8519
NaN	NaN	1.2361	1.48682	2.18972	NaN	3.30818	1.80628	3.36411	1.85319	2.11615	1.19593	2.12146	NaN	1.80106	2.57379	2.00339	NaN	0.512656	1.998	2.00339	0.00538856	0.435726	S	2	___1	anatomical structure development;anatomical structure morphogenesis;biological regulation;biosynthetic process;brain development;cell cycle arrest;cell cycle process;cell development;cell fate commitment;cell surface receptor linked signaling pathway;cellular biosynthetic process;cellular component organization;cellular component organization at cellular level;cellular component organization or b…	binding;binding, bridging;chromatin binding;DNA binding;DNA secondary structure binding;double-stranded DNA binding;four-way junction DNA binding;nucleic acid binding;protein binding;protein binding, bridging;protein N-terminus binding;regulatory region DNA binding;regulatory region nucleic acid binding;R-SMAD binding;sequence-specific DNA binding;SMAD binding;structure-specific DNA binding;trans…	cell division site part;cell part;chromatin;chromosomal part;cleavage furrow;cytoplasm;cytoplasmic part;cytosol;histone methyltransferase complex;intracellular membrane-bounded organelle;intracellular organelle;intracellular organelle part;intracellular part;macromolecular complex;membrane-bounded organelle;methyltransferase complex;nuclear matrix;nuclear part;nucleoplasm;nucleoplasm part;nucleus…	anatomical structure development;anatomical structure morphogenesis;biological regulation;biosynthetic process;cell development;cellular component organization;cellular metabolic process;cellular nitrogen compound metabolic process;cellular process;chromatin modification;chromatin organization;chromosome organization;developmental process;DNA metabolic process;DNA repair;histone modification;home…	cell part;cytoplasm;cytosol;histone methyltransferase complex;intracellular membrane-bounded organelle;intracellular organelle;macromolecular complex;nucleoplasm;nucleus;organelle;protein complex		Menin	BIOPOLYMER_METABOLIC_PROCESS;chr11q13;CTGAGCC,MIR-24;CYTOPLASM;CYTOPLASMIC_PART;CYTOSOL;DANG_BOUND_BY_MYC;DEBIASI_APOPTOSIS_BY_REOVIRUS_INFECTION_DN;DIAZ_CHRONIC_MEYLOGENOUS_LEUKEMIA_UP;FERNANDEZ_BOUND_BY_MYC;GATTGGY_V$NFY_Q6_01;GCM_HDAC1;GCM_TPR;GGGAGGRR_V$MAZ_Q6;GRESHOCK_CANCER_COPY_NUMBER_UP;GSE10325_BCELL_VS_MYELOID_UP;GSE12845_NAIVE_VS_DARKZONE_GC_TONSIL_BCELL_DN;GSE12845_PRE_GC_VS_DARKZONE_…	3D-structure;Alternativesplicing;Chromatinregulator;Completeproteome;Diseasemutation;DNA-binding;Nucleus;Phosphoprotein;Polymorphism;Referenceproteome;Repressor;Transcription;Transcriptionregulation	Menin-associated histone methyltransferase complex;MLL-HCF complex	14-3-3 domain binding motif;b-Adrenergic Receptor kinase substrate motif;Calmodulin-dependent protein kinase II substrate motif;Casein kinase II substrate motif;PAK2 kinase substrate motif;PKA kinase substrate motif;PKC epsilon kinase substrate motif;PKC kinase substrate motif	+	CST;HTP;LTP	1	6.09007e-12	135.09	129.99	80.316	0.70399	237930000	213260000	24670000	452	80.3162
-0.0385461	-0.792064	-0.60341	-0.925137	0.00529486	NaN	-0.378005	-0.242279	-0.150159	0.0596619	-0.833145	-0.464997	-0.104106	-0.909578	-0.273012	NaN	-0.606991	0.766653	0.686075	-0.310142	-0.369005	-0.0588628	0.495958	S	3	___1	biological regulation;biosynthetic process;cellular biosynthetic process;cellular component organization;cellular component organization at cellular level;cellular component organization or biogenesis;cellular component organization or biogenesis at cellular level;cellular macromolecule biosynthetic process;cellular macromolecule metabolic process;cellular metabolic process;cellular nitrogen comp…	acid-amino acid ligase activity;binding;catalytic activity;chromatin binding;DNA binding;enzyme binding;ligase activity;ligase activity, forming carbon-nitrogen bonds;nucleic acid binding;protein binding;protein binding transcription factor activity;regulatory region DNA binding;regulatory region nucleic acid binding;RNA binding;single-stranded RNA binding;small conjugating protein binding;small …	cell part;intracellular membrane-bounded organelle;intracellular organelle;intracellular organelle part;intracellular part;macromolecular complex;membrane-bounded organelle;nuclear body;nuclear part;nuclear speck;nucleoplasm;nucleoplasm part;nucleus;organelle;organelle part;PcG protein complex;PRC1 complex;protein complex	biological regulation;biosynthetic process;cellular component organization;cellular metabolic process;cellular nitrogen compound metabolic process;cellular process;chromatin modification;chromatin organization;chromosome organization;macromolecule metabolic process;macromolecule modification;metabolic process;nitrogen compound metabolic process;nucleobase-containing compound metabolic process;org…	cell part;intracellular membrane-bounded organelle;intracellular organelle;macromolecular complex;nucleoplasm;nucleus;organelle;PcG protein complex;protein complex		Chromo	AATGGAG,MIR-136;AMIT_EGF_RESPONSE_40_HELA;ANTI_APOPTOSIS;APOPTOSIS_GO;ATAAGCT,MIR-21;ATACTGT,MIR-144;BENPORATH_ES_WITH_H3K27ME3;BLUM_RESPONSE_TO_SALIRASIB_UP;BROWNE_HCMV_INFECTION_20HR_UP;BROWNE_HCMV_INFECTION_8HR_UP;CAGTATT,MIR-200B,MIR-200C,MIR-429;CELL_DEVELOPMENT;CHANDRAN_METASTASIS_TOP50_UP;CHANDRAN_METASTASIS_UP;chr17q25;CTCTAGA,MIR-526C,MIR-518F,MIR-526A;DACOSTA_UV_RESPONSE_VIA_ERCC3_TTD_U…	3D-structure;Acetylation;Alternativesplicing;Chromatinregulator;Completeproteome;Isopeptidebond;Ligase;Nucleus;Phosphoprotein;Referenceproteome;Repressor;Transcription;Transcriptionregulation;Ublconjugation;Ublconjugationpathway	CtBP complex;Polycomb repressive complex;Polycomb repressive complex 1 (PRC1, hPRC-H)	14-3-3 domain binding motif;Akt kinase substrate motif;Calmodulin-dependent protein kinase II substrate motif;Casein kinase II substrate motif;G protein-coupled receptor kinase 1 substrate motif;MAPKAPK1 kinase substrate motif;PKA kinase substrate motif;PKC kinase substrate motif	+	CST;HTP	0.996254	3.56573e-11	116	106.73	106.6	-0.76931	360880000	226570000	134300000	415	24.2485
0.057291	0.247369	-0.236848	-0.426871	-0.709866	-0.533466	-0.251975	-0.223774	0.505792	0.0966342	-0.633615	-0.0296681	0.00389039	-0.248679	-0.624451	-0.578122	-0.603167	-0.00316246	0.493529	-0.236848	-0.248679	-0.0118305	0.453897	S	3	___1	axon guidance;chemotaxis;locomotion;response to chemical stimulus;response to external stimulus;response to stimulus;taxis	binding;cation binding;heme binding;ion binding;iron ion binding;lipid binding;metal ion binding;steroid binding;tetrapyrrole binding;transition metal ion binding	cell part;cytoplasmic part;endoplasmic reticulum;endoplasmic reticulum membrane;endoplasmic reticulum part;extracellular membrane-bounded organelle;extracellular organelle;extracellular region part;extracellular vesicular exosome;integral to membrane;intracellular membrane-bounded organelle;intracellular non-membrane-bounded organelle;intracellular organelle;intracellular organelle part;intracell…	locomotion;response to chemical stimulus;response to external stimulus;response to stimulus	cell part;endoplasmic reticulum;extracellular organelle;intracellular membrane-bounded organelle;intracellular non-membrane-bounded organelle;intracellular organelle;membrane;nucleolus;organelle;vesicle		Cyt-b5	AACTTT_UNKNOWN;BLALOCK_ALZHEIMERS_DISEASE_DN;BORCZUK_MALIGNANT_MESOTHELIOMA_UP;BROWN_MYELOID_CELL_DEVELOPMENT_DN;BRUINS_UVC_RESPONSE_VIA_TP53_GROUP_A;BUYTAERT_PHOTODYNAMIC_THERAPY_STRESS_DN;CAGGTA_V$AREB6_01;CELL_SURFACE;CHIARADONNA_NEOPLASTIC_TRANSFORMATION_CDC25_UP;chrxq22;CREIGHTON_ENDOCRINE_THERAPY_RESISTANCE_3;CROMER_METASTASIS_UP;DAIRKEE_TERT_TARGETS_UP;DAVICIONI_MOLECULAR_ARMS_VS_ERMS_DN;D…	Alternativesplicing;Completeproteome;Directproteinsequencing;Endoplasmicreticulum;Lipid-binding;Membrane;Microsome;Phosphoprotein;Receptor;Referenceproteome;Steroid-binding;Transmembrane;Transmembranehelix	PGRMC1-SCAP complex	BARD1 BRCT domain binding motif;Casein kinase II substrate motif	+	CST;HTP;LTP	1	3.64334e-84	207.17	204.39	207.17	0.9174	1012800000	630270000	382550000	181	63.6994
0.639565	0.809529	-0.0548248	-0.800217	0.636311	-0.219693	0.489716	NaN	0.205432	0.341353	-0.564852	0.337898	0.420339	0.0483811	-0.213629	0.07295	-0.471958	0.230333	0.417683	0.347574	0.07295	-0.274624	0.272232	S	3	___1	biological regulation;biosynthetic process;cell cycle;cellular biosynthetic process;cellular component organization;cellular component organization at cellular level;cellular component organization or biogenesis;cellular component organization or biogenesis at cellular level;cellular macromolecule biosynthetic process;cellular macromolecule metabolic process;cellular metabolic process;cellular ni…	binding;chromatin binding;enzyme binding;protein binding;protein dimerization activity;protein heterodimerization activity	cell part;DSIF complex;intracellular membrane-bounded organelle;intracellular organelle;intracellular organelle part;intracellular part;macromolecular complex;membrane-bounded organelle;nuclear part;nucleoplasm;nucleoplasm part;nucleus;organelle;organelle part;protein complex;transcription elongation factor complex	biological regulation;biosynthetic process;cell cycle;cellular component organization;cellular metabolic process;cellular nitrogen compound metabolic process;cellular process;chromatin modification;chromatin organization;chromosome organization;macromolecule metabolic process;metabolic process;mRNA metabolic process;mRNA processing;nitrogen compound metabolic process;nucleobase-containing compoun…	cell part;intracellular membrane-bounded organelle;intracellular organelle;macromolecular complex;nucleoplasm;nucleus;organelle;protein complex;transcription elongation factor complex		KOW;Spt5_N;Spt5-NGN	BARRIER_CANCER_RELAPSE_NORMAL_SAMPLE_DN;BENPORATH_ES_CORE_NINE_CORRELATED;BENPORATH_MYC_MAX_TARGETS;BIOPOLYMER_METABOLIC_PROCESS;CAGCTG_V$AP4_Q5;chr19q13;CYCLIN_D1_KE_.V1_UP;CYCLIN_D1_UP.V1_UP;DANG_BOUND_BY_MYC;ENZYME_BINDING;GSE12845_IGD_POS_BLOOD_VS_DARKZONE_GC_TONSIL_BCELL_DN;GSE12845_IGD_POS_BLOOD_VS_NAIVE_TONSIL_BCELL_DN;GSE13485_CTRL_VS_DAY21_YF17D_VACCINE_PBMC_UP;GSE13485_DAY1_VS_DAY21_YF1…	3D-structure;Acetylation;Activator;Alternativesplicing;Completeproteome;Directproteinsequencing;Methylation;Nucleus;Phosphoprotein;Referenceproteome;Repeat;Repressor;Transcription;Transcriptionregulation	DSIF complex (DRB sensitivity-inducing factor complex);RNA pol II containing coactivator complex Tat-SF;Transcription elongation factor complex (SUPT5H, CDK9, CCNT1)	ERK1,2 kinase substrate motif;G protein-coupled receptor kinase 1 substrate motif;Growth associated histone HI kinase substrate motif;GSK3 kinase substrate motif;GSK-3, ERK1, ERK2, CDK5 substrate motif;PKA kinase substrate motif;PKC kinase substrate motif;WW domain binding motif	+	CST;HTP;LTP	0.999999	1.31886e-42	175.28	170.38	79.341	-0.45982	529690000	354600000	175080000	662	61.3258
1.31357	1.23745	-1.72153	-1.13808	-0.580253	-0.636936	-0.416499	-0.969838	-0.0847111	-1.67555	-1.51496	-1.14997	-0.535555	-1.34014	-1.57164	-0.84681	-1.39565	-0.903937	0.0355715	-0.580253	-1.34014	-0.75989	0.0258026	S	2	___1	biological regulation;biosynthetic process;cellular biosynthetic process;cellular component assembly;cellular component assembly at cellular level;cellular component organization;cellular component organization at cellular level;cellular component organization or biogenesis;cellular component organization or biogenesis at cellular level;cellular macromolecular complex assembly;cellular macromolec…	binding;catalytic activity;cysteine-type peptidase activity;hydrolase activity;nucleic acid binding;peptidase activity;peptidase activity, acting on L-amino acid peptides;RNA binding;small conjugating protein-specific protease activity;translation factor activity, nucleic acid binding;translation initiation factor activity;ubiquitin-specific protease activity	cell part;cytoplasmic part;cytosol;eukaryotic 43S preinitiation complex;eukaryotic 48S preinitiation complex;eukaryotic translation initiation factor 3 complex;intracellular part;macromolecular complex;membrane;protein complex;ribonucleoprotein complex;translation preinitiation complex	biological regulation;biosynthetic process;cellular component assembly;cellular component organization;cellular macromolecular complex assembly;cellular metabolic process;cellular process;macromolecular complex assembly;macromolecule metabolic process;macromolecule modification;metabolic process;primary metabolic process;protein metabolic process;protein modification by small protein conjugation …	cell part;cytosol;macromolecular complex;membrane;protein complex;ribonucleoprotein complex	RNA transport	JAB;MitMem_reg	ACEVEDO_LIVER_TUMOR_VS_NORMAL_ADJACENT_TISSUE_UP;ALCALA_APOPTOSIS;APPIERTO_RESPONSE_TO_FENRETINIDE_DN;BENPORATH_NANOG_TARGETS;BENPORATH_SOX2_TARGETS;BILANGES_SERUM_AND_RAPAMYCIN_SENSITIVE_GENES;BILANGES_SERUM_RESPONSE_TRANSLATION;BIOSYNTHETIC_PROCESS;CAIRO_HEPATOBLASTOMA_CLASSES_UP;CELLULAR_BIOSYNTHETIC_PROCESS;CELLULAR_COMPONENT_ASSEMBLY;CELLULAR_MACROMOLECULE_METABOLIC_PROCESS;CELLULAR_PROTEIN_…	3D-structure;Acetylation;Completeproteome;Cytoplasm;Hydrolase;Initiationfactor;Phosphoprotein;Polymorphism;Protease;Proteinbiosynthesis;Referenceproteome;Thiolprotease;Ublconjugationpathway	eIF3 complex (EIF3S6, EIF3S5, EIF3S4, EIF3S3, EIF3S6IP, EIF3S2, EIF3S9, EIF3S12, EIF3S10, EIF3S8, EIF3S1, EIF3S7);eIF3 complex (EIF3S6, EIF3S5, EIF3S4, EIF3S3, EIF3S6IP, EIF3S2, EIF3S9, EIF3S12, EIF3S10, EIF3S8, EIF3S1, EIF3S7, PCID1)	AMP-activated protein kinase substrate motif;Cdc2 kinase substrate motif;CDK kinase substrate motif;CDK1,2,4,6 kinase substrate motif;ERK1,2 kinase substrate motif;GSK-3, ERK1, ERK2, CDK5 substrate motif;PKA kinase substrate motif;WW domain binding motif	+	CST;HTP	1	0.000672314	113.62	90.603	104.2	0.083614	136140000	74462000	61675000	258	67.4965
NaN	3.15026	0.105861	0.514454	-0.407237	-0.00631474	-0.377262	NaN	-1.42441	-0.563918	NaN	-0.304575	-0.169719	-0.793049	NaN	NaN	0.701524	NaN	0.472921	-0.00631474	-0.304575	-0.29826	0.250995	S	2	___1	biological regulation;biosynthetic process;cell surface receptor linked signaling pathway;cellular biosynthetic process;cellular macromolecule biosynthetic process;cellular macromolecule metabolic process;cellular metabolic process;cellular process;cellular protein metabolic process;cellular response to chemical stimulus;cellular response to endogenous stimulus;cellular response to hormone stimul…	adenyl nucleotide binding;adenyl ribonucleotide binding;ATP binding;binding;calcium ion binding;calmodulin binding;calmodulin-dependent protein kinase activity;catalytic activity;cation binding;elongation factor-2 kinase activity;ion binding;kinase activity;metal ion binding;nucleic acid binding;nucleotide binding;phosphotransferase activity, alcohol group as acceptor;protein binding;protein kina…	cell part;cytoplasm;cytoplasmic part;cytosol;intracellular part	biological regulation;biosynthetic process;cellular metabolic process;cellular process;macromolecule metabolic process;macromolecule modification;metabolic process;phosphorus metabolic process;primary metabolic process;protein metabolic process;protein modification process;protein phosphorylation;regulation of protein modification process;response to chemical stimulus;response to endogenous stimu…	cell part;cytoplasm;cytosol		Alpha_kinase;Sel1	ACEVEDO_NORMAL_TISSUE_ADJACENT_TO_LIVER_TUMOR_DN;BASAKI_YBX1_TARGETS_DN;BIOCARTA_EIF_PATHWAY;BIOPOLYMER_BIOSYNTHETIC_PROCESS;BIOPOLYMER_METABOLIC_PROCESS;BIOSYNTHETIC_PROCESS;CELLULAR_BIOSYNTHETIC_PROCESS;CELLULAR_MACROMOLECULE_METABOLIC_PROCESS;CELLULAR_PROTEIN_METABOLIC_PROCESS;chr16p12;CYTOPLASM;DAIRKEE_TERT_TARGETS_UP;FEVR_CTNNB1_TARGETS_UP;FULCHER_INFLAMMATORY_RESPONSE_LECTIN_VS_LPS_UP;GARGA…	Acetylation;ATP-binding;Calcium;Calmodulin-binding;Completeproteome;Kinase;Nucleotide-binding;Phosphoprotein;Polymorphism;Referenceproteome;Serine/threonine-proteinkinase;Transferase		ERK1,2 kinase substrate motif;Growth associated histone HI kinase substrate motif;GSK-3, ERK1, ERK2, CDK5 substrate motif;PKA kinase substrate motif;PKC kinase substrate motif;WW domain binding motif	+	CST;HTP	1	1.4308e-05	103.88	87.934	103.88	0.36248	51569000	30997000	20572000	18	103.875
1.27335	-1.13445	-0.21018	0.492832	NaN	NaN	NaN	1.70356	NaN	2.01475	-0.767735	1.12173	0.319603	NaN	0.104411	NaN	NaN	1.56432	0.660278	0.492832	0.720665	0.227833	0.224839	S	2	___1	anatomical structure development;anatomical structure formation involved in morphogenesis;anatomical structure morphogenesis;angiogenesis;biological regulation;cell development;cellular developmental process;cellular process;definitive hemopoiesis;developmental process;hemopoiesis;hemopoietic or lymphoid organ development;lens morphogenesis in camera-type eye;megakaryocyte development;negative re…	binding;chromatin binding;core promoter proximal region DNA binding;core promoter proximal region sequence-specific DNA binding;DNA binding;nucleic acid binding;nucleic acid binding transcription factor activity;regulatory region DNA binding;regulatory region nucleic acid binding;RNA polymerase II core promoter proximal region sequence-specific DNA binding;RNA polymerase II core promoter proximal…	cell part;intracellular membrane-bounded organelle;intracellular organelle;intracellular organelle part;intracellular part;macromolecular complex;membrane-bounded organelle;nuclear part;nucleoplasm part;nucleus;organelle;organelle part;protein complex;transcription factor complex	anatomical structure development;anatomical structure formation involved in morphogenesis;anatomical structure morphogenesis;biological regulation;cell development;cellular process;developmental process	cell part;intracellular membrane-bounded organelle;intracellular organelle;macromolecular complex;nucleus;organelle;protein complex;transcription factor complex		Homeobox_KN	AAANWWTGC_UNKNOWN;AAAYRNCTG_UNKNOWN;AACTTT_UNKNOWN;AATGTGA,MIR-23A,MIR-23B;ACATTCC,MIR-1,MIR-206;ACCAATC,MIR-509;ACTGCAG,MIR-17-3P;AGCATTA,MIR-155;ALCALAY_AML_BY_NPM1_LOCALIZATION_UP;ATACTGT,MIR-144;ATGTAGC,MIR-221,MIR-222;BASAKI_YBX1_TARGETS_DN;BENPORATH_ES_WITH_H3K27ME3;BERENJENO_TRANSFORMED_BY_RHOA_DN;BOQUEST_STEM_CELL_UP;BROWNE_HCMV_INFECTION_6HR_DN;CASORELLI_ACUTE_PROMYELOCYTIC_LEUKEMIA_DN;C…	Activator;Alternativesplicing;Completeproteome;Developmentalprotein;DNA-binding;Homeobox;Nucleus;Polymorphism;Referenceproteome;Transcription		Casein kinase II substrate motif	+	HTP	0.999867	2.04478e-46	184.32	173.97	184.32	-0.14738	284470000	232660000	51809000	196	38.8475
0.240536	-0.442573	-0.0101805	-0.708984	-0.128769	-0.882682	-0.502824	-0.37959	-0.847732	-0.715451	-0.617269	-0.565061	-0.083883	-0.23196	-0.693797	-0.66107	-1.00359	-0.0886611	0.512553	-0.442573	-0.617269	-0.174695	0.370674	S	2	___1	biological regulation;regulation of biological process;regulation of cell growth;regulation of cellular component organization;regulation of cellular process;regulation of growth	apoptotic protease activator activity;enzyme activator activity;enzyme regulator activity;peptidase activator activity;peptidase regulator activity	adherens junction;anchoring junction;cell junction;cell part;cell-substrate adherens junction;cell-substrate junction;cytoplasmic membrane-bounded vesicle;cytoplasmic part;cytoplasmic vesicle;focal adhesion;Golgi apparatus;Golgi apparatus part;Golgi membrane;integral to membrane;intracellular membrane-bounded organelle;intracellular organelle;intracellular organelle part;intracellular part;intrin…	biological regulation	cell part;cytoplasmic membrane-bounded vesicle;Golgi apparatus;intracellular membrane-bounded organelle;intracellular organelle;membrane;organelle;plasma membrane;vesicle			BECKER_TAMOXIFEN_RESISTANCE_UP;BOCHKIS_FOXA2_TARGETS;BRUINS_UVC_RESPONSE_EARLY_LATE;BUYTAERT_PHOTODYNAMIC_THERAPY_STRESS_DN;CHOW_RASSF1_TARGETS_DN;chr8q23;CLIMENT_BREAST_CANCER_COPY_NUMBER_UP;CTTTGA_V$LEF1_Q2;CUI_TCF21_TARGETS_2_DN;DIAZ_CHRONIC_MEYLOGENOUS_LEUKEMIA_UP;ENK_UV_RESPONSE_KERATINOCYTE_DN;GGCNKCCATNK_UNKNOWN;GGGAGGRR_V$MAZ_Q6;GGGCGGR_V$SP1_Q6;GSE11864_UNTREATED_VS_CSF1_IN_MAC_DN;GSE137…	Alternativesplicing;Apoptosis;Coiledcoil;Completeproteome;Golgiapparatus;Membrane;Phosphoprotein;Referenceproteome;Signal-anchor;Transmembrane;Transmembranehelix		14-3-3 domain binding motif;Akt kinase substrate motif;Calmodulin-dependent protein kinase II substrate motif;MAPKAPK1 kinase substrate motif;PKA kinase substrate motif;PKC epsilon kinase substrate motif;PKC kinase substrate motif	+	CST;HTP	1	1.83436e-115	241.22	234.56	241.22	0.23241	6857600000	4190300000	2667300000	36	86.8974
2.73253	2.36331	NaN	1.00111	1.89133	2.80098	NaN	NaN	2.1946	1.46137	2.41164	1.36712	2.81267	1.84351	2.00647	1.6763	2.18525	3.7685	0.986593	2.27895	2.00647	-0.272482	0.274199	S	2	___1	cellular macromolecule metabolic process;cellular metabolic process;cellular nitrogen compound metabolic process;cellular process;macromolecule metabolic process;macromolecule modification;metabolic process;ncRNA metabolic process;ncRNA processing;nitrogen compound metabolic process;nucleic acid metabolic process;nucleobase-containing compound metabolic process;primary metabolic process;RNA metab…	binding;nucleic acid binding;RNA binding;snoRNA binding	box C/D snoRNP complex;cell part;cytoplasm;intracellular non-membrane-bounded organelle;intracellular organelle;intracellular organelle part;intracellular part;macromolecular complex;membrane;non-membrane-bounded organelle;nuclear part;nucleolar part;nucleolus;nucleoplasm;organelle;organelle part;preribosome;pre-snoRNP complex;ribonucleoprotein complex;small nucleolar ribonucleoprotein complex;sm…	cellular metabolic process;cellular nitrogen compound metabolic process;cellular process;macromolecule metabolic process;macromolecule modification;metabolic process;nitrogen compound metabolic process;nucleobase-containing compound metabolic process;primary metabolic process;RNA metabolic process;RNA modification;RNA processing;rRNA processing	cell part;cytoplasm;intracellular non-membrane-bounded organelle;intracellular organelle;macromolecular complex;membrane;nucleolus;nucleoplasm;organelle;preribosome;ribonucleoprotein complex;small nucleolar ribonucleoprotein complex	Ribosome biogenesis in eukaryotes	Nop;NOP5NT;NOSIC	ABRAMSON_INTERACT_WITH_AIRE;ALFANO_MYC_TARGETS;BENPORATH_ES_1;BILD_MYC_ONCOGENIC_SIGNATURE;BIOPOLYMER_METABOLIC_PROCESS;BLALOCK_ALZHEIMERS_DISEASE_UP;BROWN_MYELOID_CELL_DEVELOPMENT_DN;BURTON_ADIPOGENESIS_2;BURTON_ADIPOGENESIS_PEAK_AT_8HR;CACGTG_V$MYC_Q2;CAIRO_HEPATOBLASTOMA_CLASSES_UP;chr20p13;DODD_NASOPHARYNGEAL_CARCINOMA_DN;DUTERTRE_ESTRADIOL_RESPONSE_6HR_UP;E2F1_UP.V1_UP;FEVR_CTNNB1_TARGETS_DN…	Acetylation;Completeproteome;Cytoplasm;Directproteinsequencing;Neurodegeneration;Nucleus;Phosphoprotein;Polymorphism;Referenceproteome;Ribonucleoprotein;Ribosomebiogenesis;Spinocerebellarataxia	Nop56p-associated pre-rRNA complex	14-3-3 domain binding motif;Calmodulin-dependent protein kinase II substrate motif;Casein kinase II substrate motif;G protein-coupled receptor kinase 1 substrate motif;MAPKAPK1 kinase substrate motif;Pim1 kinase substrate sequence;PKA kinase substrate motif;PKC epsilon kinase substrate motif;PKC kinase substrate motif	+	CST;HTP	1	7.41741e-76	211.71	203.2	46.412	-3.0688	4824900000	4200000000	624890000	563	46.4122
1.43768	0.598313	0.198725	0.075804	1.39057	0.626005	1.34777	1.01768	1.56021	1.06599	1.10508	-0.190027	1.19618	0.959227	0.935277	1.09659	0.769033	1.16529	0.944459	1.01768	1.06599	0.0483048	0.391105	S	2	___1	anatomical structure development;anatomical structure formation involved in morphogenesis;androgen receptor signaling pathway;ATP-dependent chromatin remodeling;biological regulation;biosynthetic process;blood vessel development;cardiac chamber development;cellular biosynthetic process;cellular component disassembly;cellular component disassembly at cellular level;cellular component organization;…	binding;DNA binding;ligand-dependent nuclear receptor binding;nucleic acid binding;protein binding;protein binding transcription factor activity;receptor binding;transcription coactivator activity;transcription cofactor activity;transcription factor binding transcription factor activity	cell part;chromatin;chromatin remodeling complex;chromosomal part;intracellular membrane-bounded organelle;intracellular organelle;intracellular organelle part;intracellular part;macromolecular complex;membrane-bounded organelle;nBAF complex;npBAF complex;nuclear chromatin;nuclear chromosome part;nuclear part;nucleoplasm;nucleus;organelle;organelle part;protein complex;SWI/SNF complex;SWI/SNF-typ…	anatomical structure development;anatomical structure formation involved in morphogenesis;biological regulation;biosynthetic process;cellular component disassembly;cellular component organization;cellular metabolic process;cellular nitrogen compound metabolic process;cellular process;chromatin modification;chromatin organization;chromosome organization;developmental process;macromolecule metaboli…	cell part;chromatin remodeling complex;intracellular membrane-bounded organelle;intracellular organelle;macromolecular complex;nucleoplasm;nucleus;organelle;protein complex		ARID;DUF3518	AAAYRNCTG_UNKNOWN;AACTTT_UNKNOWN;ACACTGG,MIR-199A,MIR-199B;ACCAAAG,MIR-9;AGCTCCT,MIR-28;AGGGCAG,MIR-18A;ANDROGEN_RECEPTOR_SIGNALING_PATHWAY;ATAAGCT,MIR-21;ATACTGT,MIR-144;ATGTACA,MIR-493;ATGTAGC,MIR-221,MIR-222;BENPORATH_EED_TARGETS;BIOPOLYMER_METABOLIC_PROCESS;BLALOCK_ALZHEIMERS_DISEASE_INCIPIENT_UP;BLALOCK_ALZHEIMERS_DISEASE_UP;BRUINS_UVC_RESPONSE_EARLY_LATE;BURTON_ADIPOGENESIS_12;BYSTRYKH_HEMA…	3D-structure;Acetylation;Alternativesplicing;Chromatinregulator;Completeproteome;Directproteinsequencing;DNA-binding;Mentalretardation;Neurogenesis;Nucleus;Phosphoprotein;Polymorphism;Referenceproteome;Transcription;Transcriptionregulation	BAF complex;BRG1-associated complex;Brg1-associated complex I;Brg1-associated complex II;BRG1-SIN3A complex;BRG1-SIN3A-HDAC containing SWI/SNF remodeling complex I;Brm-associated complex;BRM-associated complex;BRM-SIN3A complex;BRM-SIN3A-HDAC complex;EBAFa complex;LARC complex (LCR-associated remodeling complex);NUMAC complex (nucleosomal methylation activator complex);p300-CBP-p270 complex;p300-…	Casein kinase II substrate motif;G protein-coupled receptor kinase 1 substrate motif;GSK3 kinase substrate motif;PKA kinase substrate motif;PKC kinase substrate motif	+	HTP	1	8.34079e-08	115.69	108.79	89.507	-0.37005	450960000	351150000	99814000	1751	84.6126
-0.0383529	0.169692	0.110089	-0.105238	-0.0422284	-0.343202	0.309813	0.407274	-0.184238	0.216052	0.0868002	0.676376	-0.0603933	0.484305	0.220642	0.133338	-0.489673	-0.231411	0.565135	-0.0383529	0.133338	0.171691	0.272257	S	2	___1	anatomical structure development;anatomical structure formation involved in morphogenesis;androgen receptor signaling pathway;ATP-dependent chromatin remodeling;biological regulation;biosynthetic process;blood vessel development;cardiac chamber development;cellular biosynthetic process;cellular component disassembly;cellular component disassembly at cellular level;cellular component organization;…	binding;DNA binding;ligand-dependent nuclear receptor binding;nucleic acid binding;protein binding;protein binding transcription factor activity;receptor binding;transcription coactivator activity;transcription cofactor activity;transcription factor binding transcription factor activity	cell part;chromatin;chromatin remodeling complex;chromosomal part;intracellular membrane-bounded organelle;intracellular organelle;intracellular organelle part;intracellular part;macromolecular complex;membrane-bounded organelle;nBAF complex;npBAF complex;nuclear chromatin;nuclear chromosome part;nuclear part;nucleoplasm;nucleus;organelle;organelle part;protein complex;SWI/SNF complex;SWI/SNF-typ…	anatomical structure development;anatomical structure formation involved in morphogenesis;biological regulation;biosynthetic process;cellular component disassembly;cellular component organization;cellular metabolic process;cellular nitrogen compound metabolic process;cellular process;chromatin modification;chromatin organization;chromosome organization;developmental process;macromolecule metaboli…	cell part;chromatin remodeling complex;intracellular membrane-bounded organelle;intracellular organelle;macromolecular complex;nucleoplasm;nucleus;organelle;protein complex		ARID;DUF3518	AAAYRNCTG_UNKNOWN;AACTTT_UNKNOWN;ACACTGG,MIR-199A,MIR-199B;ACCAAAG,MIR-9;AGCTCCT,MIR-28;AGGGCAG,MIR-18A;ANDROGEN_RECEPTOR_SIGNALING_PATHWAY;ATAAGCT,MIR-21;ATACTGT,MIR-144;ATGTACA,MIR-493;ATGTAGC,MIR-221,MIR-222;BENPORATH_EED_TARGETS;BIOPOLYMER_METABOLIC_PROCESS;BLALOCK_ALZHEIMERS_DISEASE_INCIPIENT_UP;BLALOCK_ALZHEIMERS_DISEASE_UP;BRUINS_UVC_RESPONSE_EARLY_LATE;BURTON_ADIPOGENESIS_12;BYSTRYKH_HEMA…	3D-structure;Acetylation;Alternativesplicing;Chromatinregulator;Completeproteome;Directproteinsequencing;DNA-binding;Mentalretardation;Neurogenesis;Nucleus;Phosphoprotein;Polymorphism;Referenceproteome;Transcription;Transcriptionregulation	BAF complex;BRG1-associated complex;Brg1-associated complex I;Brg1-associated complex II;BRG1-SIN3A complex;BRG1-SIN3A-HDAC containing SWI/SNF remodeling complex I;Brm-associated complex;BRM-associated complex;BRM-SIN3A complex;BRM-SIN3A-HDAC complex;EBAFa complex;LARC complex (LCR-associated remodeling complex);NUMAC complex (nucleosomal methylation activator complex);p300-CBP-p270 complex;p300-…	14-3-3 domain binding motif;AMP-activated protein kinase substrate motif;Calmodulin-dependent protein kinase II substrate motif;Casein kinase II substrate motif;DNA dependent Protein kinase substrate motif;ERK1,2 kinase substrate motif;GSK-3, ERK1, ERK2, CDK5 substrate motif;HMGCoA Reductase kinase substrate motif;PKA kinase substrate motif;PKC kinase substrate motif;WW domain binding motif	+	CST;HTP;LTP	1	7.50684e-63	206.49	184.29	160.67	-0.98012	1835300000	1379000000	456350000	696	143.285
-0.198007	-0.201565	NaN	-0.166117	-0.111053	0.385264	0.491136	NaN	0.345271	0.555559	0.569201	0.41189	0.0564024	0.198212	0.705181	0.256569	0.724565	0.505447	0.0257297	-0.111053	0.505447	0.616499	0.0364017	S	3	___1	anatomical structure development;anatomical structure formation involved in morphogenesis;androgen receptor signaling pathway;ATP-dependent chromatin remodeling;biological regulation;biosynthetic process;blood vessel development;cardiac chamber development;cellular biosynthetic process;cellular component disassembly;cellular component disassembly at cellular level;cellular component organization;…	binding;DNA binding;ligand-dependent nuclear receptor binding;nucleic acid binding;protein binding;protein binding transcription factor activity;receptor binding;transcription coactivator activity;transcription cofactor activity;transcription factor binding transcription factor activity	cell part;chromatin;chromatin remodeling complex;chromosomal part;intracellular membrane-bounded organelle;intracellular organelle;intracellular organelle part;intracellular part;macromolecular complex;membrane-bounded organelle;nBAF complex;npBAF complex;nuclear chromatin;nuclear chromosome part;nuclear part;nucleoplasm;nucleus;organelle;organelle part;protein complex;SWI/SNF complex;SWI/SNF-typ…	anatomical structure development;anatomical structure formation involved in morphogenesis;biological regulation;biosynthetic process;cellular component disassembly;cellular component organization;cellular metabolic process;cellular nitrogen compound metabolic process;cellular process;chromatin modification;chromatin organization;chromosome organization;developmental process;macromolecule metaboli…	cell part;chromatin remodeling complex;intracellular membrane-bounded organelle;intracellular organelle;macromolecular complex;nucleoplasm;nucleus;organelle;protein complex		ARID;DUF3518	AAAYRNCTG_UNKNOWN;AACTTT_UNKNOWN;ACACTGG,MIR-199A,MIR-199B;ACCAAAG,MIR-9;AGCTCCT,MIR-28;AGGGCAG,MIR-18A;ANDROGEN_RECEPTOR_SIGNALING_PATHWAY;ATAAGCT,MIR-21;ATACTGT,MIR-144;ATGTACA,MIR-493;ATGTAGC,MIR-221,MIR-222;BENPORATH_EED_TARGETS;BIOPOLYMER_METABOLIC_PROCESS;BLALOCK_ALZHEIMERS_DISEASE_INCIPIENT_UP;BLALOCK_ALZHEIMERS_DISEASE_UP;BRUINS_UVC_RESPONSE_EARLY_LATE;BURTON_ADIPOGENESIS_12;BYSTRYKH_HEMA…	3D-structure;Acetylation;Alternativesplicing;Chromatinregulator;Completeproteome;Directproteinsequencing;DNA-binding;Mentalretardation;Neurogenesis;Nucleus;Phosphoprotein;Polymorphism;Referenceproteome;Transcription;Transcriptionregulation	BAF complex;BRG1-associated complex;Brg1-associated complex I;Brg1-associated complex II;BRG1-SIN3A complex;BRG1-SIN3A-HDAC containing SWI/SNF remodeling complex I;Brm-associated complex;BRM-associated complex;BRM-SIN3A complex;BRM-SIN3A-HDAC complex;EBAFa complex;LARC complex (LCR-associated remodeling complex);NUMAC complex (nucleosomal methylation activator complex);p300-CBP-p270 complex;p300-…	Casein kinase II substrate motif;ERK1,2 kinase substrate motif;G protein-coupled receptor kinase 1 substrate motif;GSK3 kinase substrate motif;GSK-3, ERK1, ERK2, CDK5 substrate motif;WW domain binding motif	+	CST;HTP;LTP	0.999973	6.83765e-32	135.64	132.71	135.64	0.69598	497960000	349480000	148490000	363	45.9202
NaN	NaN	0.62728	NaN	-0.875004	-0.298663	0.365832	0.530109	-0.494355	NaN	0.44337	NaN	NaN	-0.216035	-0.00452935	NaN	0.386817	-0.0943183	0.667499	0.0335843	-0.00452935	-0.0381136	0.481806	S	3	___1	biological regulation;positive regulation of biological process;positive regulation of cellular process;positive regulation of hormone secretion;positive regulation of insulin secretion;positive regulation of insulin secretion involved in cellular response to glucose stimulus;positive regulation of peptide hormone secretion;positive regulation of peptide secretion;positive regulation of secretion…		cell part;integral to membrane;intrinsic to membrane;membrane part	biological regulation;regulation of transport	cell part			ATF2_UP.V1_UP;BMI1_DN.V1_UP;BMI1_DN_MEL18_DN.V1_UP;BROWNE_HCMV_INFECTION_6HR_UP;CACGTG_V$MYC_Q2;CAGGTG_V$E12_Q6;CCCNNGGGAR_V$OLF1_01;chr11q23;CTTTAAR_UNKNOWN;DACOSTA_UV_RESPONSE_VIA_ERCC3_UP;DAIRKEE_TERT_TARGETS_DN;DCA_UP.V1_DN;DODD_NASOPHARYNGEAL_CARCINOMA_UP;EBAUER_TARGETS_OF_PAX3_FOXO1_FUSION_UP;GCANCTGNY_V$MYOD_Q6;GGATTA_V$PITX2_Q2;GGGAGGRR_V$MAZ_Q6;GGGCGGR_V$SP1_Q6;GGGTGGRR_V$PAX4_03;GSE1032…	Alternativesplicing;Completeproteome;Membrane;Phosphoprotein;Polymorphism;Referenceproteome;Transmembrane;Transmembranehelix		ATM kinase substrate motif;Casein kinase II substrate motif;DNA dependent Protein kinase substrate motif	+	HTP	0.944312	3.50209e-85	208.69	199	101.92	2.0474	481930000	308200000	173730000	660	12.2958
-0.488433	0.414425	1.18176	1.41141	-0.92766	0.102519	0.528627	0.812104	0.310714	-0.882662	1.04063	0.755968	-0.0440011	1.37856	1.19834	0.693671	0.782369	NaN	0.51038	0.414425	0.769169	0.354744	0.136775	S	2	___1	cellular component assembly;cellular component assembly at cellular level;cellular component organization;cellular component organization at cellular level;cellular component organization or biogenesis;cellular component organization or biogenesis at cellular level;cellular macromolecular complex assembly;cellular macromolecular complex subunit organization;cellular membrane organization;cellular…	AP-2 adaptor complex binding;binding;protein binding;protein complex binding	cell part;coated pit;membrane;membrane part;plasma membrane	cellular component assembly;cellular component organization;cellular macromolecular complex assembly;cellular membrane organization;cellular process;endocytosis;establishment of localization;macromolecular complex assembly;membrane invagination;membrane organization;organelle organization;protein complex assembly;transport;vesicle organization;vesicle-mediated transport	cell part;membrane;plasma membrane		FCH;muHD	BHAT_ESR1_TARGETS_VIA_AKT1_UP;BONOME_OVARIAN_CANCER_POOR_SURVIVAL_DN;BONOME_OVARIAN_CANCER_SURVIVAL_SUBOPTIMAL_DEBULKING;BRUINS_UVC_RESPONSE_VIA_TP53_GROUP_D;chr19p13;DASU_IL6_SIGNALING_SCAR_UP;DASU_IL6_SIGNALING_UP;E2F1_UP.V1_DN;GSE11864_CSF1_VS_CSF1_IFNG_IN_MAC_DN;GSE11924_TFH_VS_TH17_CD4_TCELL_UP;GSE12366_PLASMA_CELL_VS_NAIVE_BCELL_DN;GSE12845_IGD_POS_VS_NEG_BLOOD_BCELL_UP;GSE17721_0.5H_VS_24H…	Alternativesplicing;Coatedpit;Coiledcoil;Completeproteome;Endocytosis;Membrane;Phosphoprotein;Referenceproteome		14-3-3 domain binding motif;Akt kinase substrate motif;Calmodulin-dependent protein kinase II substrate motif;G protein-coupled receptor kinase 1 substrate motif;MAPKAPK1 kinase substrate motif;MAPKAPK2 kinase substrate motif;PKA kinase substrate motif;PKC epsilon kinase substrate motif;PKC kinase substrate motif	+	CST;HTP	1	5.78975e-05	129.74	111.06	129.74	-0.34251	351140000	264790000	86354000	570	83.1015
NaN	NaN	-3.08514	NaN	NaN	-1.51267	-1.8826	-1.81968	-1.49544	NaN	-2.26657	-1.20644	-2.69246	NaN	-2.18813	-1.99413	NaN	NaN	0.779363	-1.81968	-2.18813	-0.368454	0.193453	S	3	___1	anatomical structure development;biological regulation;cell cycle phase;cell cycle process;cell differentiation;cell projection organization;cellular component organization;cellular component organization at cellular level;cellular component organization or biogenesis;cellular component organization or biogenesis at cellular level;cellular developmental process;cellular process;cellular response …	adenyl nucleotide binding;adenyl ribonucleotide binding;ATP binding;binding;catalytic activity;cation binding;ion binding;kinase activity;metal ion binding;nucleotide binding;PDZ domain binding;phosphotransferase activity, alcohol group as acceptor;protein binding;protein domain specific binding;protein kinase activity;protein serine/threonine kinase activity;purine nucleotide binding;purine ribo…	actin cytoskeleton;cell body;cell part;cell projection;cytoplasmic part;cytoskeleton;cytosol;Golgi apparatus part;Golgi cisterna;intracellular membrane-bounded organelle;intracellular non-membrane-bounded organelle;intracellular organelle;intracellular organelle part;intracellular part;membrane;membrane-bounded organelle;neuronal cell body;non-membrane-bounded organelle;organelle;organelle part;o…	anatomical structure development;biological regulation;cell differentiation;cellular component organization;cellular process;chromosome organization;chromosome segregation;cytokinesis;developmental process;Golgi organization;mitosis;multicellular organismal process;nuclear division;organelle fission;organelle organization;regulation of organelle organization;response to stimulus;signal transducti…	cell body;cell part;cell projection;cytoskeleton;cytosol;intracellular membrane-bounded organelle;intracellular non-membrane-bounded organelle;intracellular organelle;membrane;neuronal cell body;organelle;plasma membrane;vacuole		CNH;Pkinase;Pkinase_C	AAACCAC,MIR-140;ACTGTGA,MIR-27A,MIR-27B;AGGGCAG,MIR-18A;AGGTGCA,MIR-500;AMUNDSON_RESPONSE_TO_ARSENITE;ANATOMICAL_STRUCTURE_DEVELOPMENT;BENPORATH_CYCLING_GENES;BROWNE_HCMV_INFECTION_14HR_DN;BROWNE_HCMV_INFECTION_4HR_DN;CACCAGC,MIR-138;CADWELL_ATG16L1_TARGETS_UP;CAGCAGG,MIR-370;CELL_CYCLE_GO_0007049;CELL_CYCLE_PHASE;CELL_CYCLE_PROCESS;CELL_DEVELOPMENT;chr12q24;DUTERTRE_ESTRADIOL_RESPONSE_24HR_UP;GA…	Acetylation;Alternativesplicing;ATP-binding;Cellcycle;Celldivision;Coiledcoil;Completeproteome;Cytoplasm;Developmentalprotein;Differentiation;Kinase;Metal-binding;Mitosis;Neurogenesis;Nucleotide-binding;Phosphoprotein;Polymorphism;Referenceproteome;Serine/threonine-proteinkinase;SH3-binding;Transferase;Zinc;Zinc-finger		14-3-3 domain binding motif;Calmodulin-dependent protein kinase II substrate motif;Calmodulin-dependent protein kinase IV substrate motif;Cdc2 kinase substrate motif;CDK kinase substrate motif;CDK1,2,4,6 kinase substrate motif;Chk1 kinase substrate motif;CLK1 kinase substrate motif;ERK1,2 kinase substrate motif;G protein-coupled receptor kinase 1 substrate motif;Growth associated histone HI kinas…	+	CST;HTP	1	0.000188	71.558	48.089	67.019	0.66222	156770000	61181000	95588000	2013	67.0193
0.667762	-0.276933	-0.667438	-0.00101014	-1.23463	-0.27742	NaN	0.0492226	-0.2607	0.437331	0.873695	0.408156	1.32393	0.0953828	0.0776103	-0.0800823	-0.920922	1.12059	0.0569131	-0.268816	0.408156	0.676972	0.0252573	S	2	___1	cellular component organization;cellular component organization at cellular level;cellular component organization or biogenesis;cellular component organization or biogenesis at cellular level;cellular process;COPI coating of Golgi vesicle;ER to Golgi vesicle-mediated transport;establishment of localization;establishment of localization in cell;establishment of protein localization;Golgi transport…	structural molecule activity	cell part;COPI vesicle coat;cytoplasmic part;cytoplasmic vesicle part;cytosol;Golgi apparatus;Golgi apparatus part;intracellular membrane-bounded organelle;intracellular organelle;intracellular organelle part;intracellular part;macromolecular complex;membrane coat;membrane part;membrane-bounded organelle;nuclear part;nucleoplasm;organelle;organelle part;protein complex;vesicle coat	cellular component organization;cellular process;establishment of localization;Golgi vesicle transport;membrane organization;organelle organization;protein transport;transport;vesicle organization;vesicle-mediated transport	cell part;cytosol;Golgi apparatus;intracellular membrane-bounded organelle;intracellular organelle;macromolecular complex;nucleoplasm;organelle;protein complex		Coatomer_E	ACEVEDO_LIVER_TUMOR_VS_NORMAL_ADJACENT_TISSUE_UP;BENPORATH_NANOG_TARGETS;CAMP_UP.V1_UP;CELLULAR_LOCALIZATION;CHAUHAN_RESPONSE_TO_METHOXYESTRADIOL_DN;chr19p13;COATED_MEMBRANE;COATED_VESICLE;COATED_VESICLE_MEMBRANE;CYTOPLASM;CYTOPLASMIC_MEMBRANE_BOUND_VESICLE;CYTOPLASMIC_PART;CYTOPLASMIC_VESICLE;CYTOPLASMIC_VESICLE_MEMBRANE;CYTOPLASMIC_VESICLE_PART;ENDOMEMBRANE_SYSTEM;ENK_UV_RESPONSE_KERATINOCYTE_U…	Alternativesplicing;Completeproteome;Cytoplasm;Cytoplasmicvesicle;Directproteinsequencing;ER-Golgitransport;Golgiapparatus;Membrane;Phosphoprotein;Polymorphism;Proteintransport;Referenceproteome;Transport;Ublconjugation		14-3-3 domain binding motif;Aurora-A kinase substrate motif;b-Adrenergic Receptor kinase substrate motif;Calmodulin-dependent protein kinase II substrate motif;MAPKAPK2 kinase substrate motif;PAK2 kinase substrate motif;Phosphorylase kinase substrate motif;PKA kinase substrate motif;PKC epsilon kinase substrate motif;PKC kinase substrate motif	+	CST;HTP	1	9.18949e-07	122.08	83.78	122.08	-0.1448	92507000	60285000	32223000	99	122.08
-0.58194	0.110054	0.962299	0.889879	-0.489319	-0.637098	NaN	0.515671	-0.142351	-0.479642	0.736977	0.618001	0.252381	1.20635	0.869951	0.171259	-0.341225	1.07112	0.233653	-0.0161484	0.618001	0.634149	0.0327959	S	3	___1	anterograde axon cargo transport;anterograde synaptic vesicle transport;antigen processing and presentation;antigen processing and presentation of exogenous antigen;antigen processing and presentation of lipid antigen via MHC class Ib;antigen processing and presentation via MHC class Ib;antigen processing and presentation, exogenous lipid antigen via MHC class Ib;axon cargo transport;biological r…	transporter activity	axon part;cell part;cell projection part;cytoplasmic part;endosomal part;endosome membrane;Golgi apparatus;Golgi apparatus part;Golgi membrane;intracellular membrane-bounded organelle;intracellular organelle;intracellular organelle part;intracellular part;lysosomal membrane;macromolecular complex;membrane;membrane coat;membrane part;membrane-bounded organelle;nuclear part;nucleoplasm;organelle;or…	biological regulation;biosynthetic process;cellular component movement;cellular component organization;cellular localization;cellular membrane organization;cellular process;cytoskeleton-dependent intracellular transport;endosome transport;establishment of localization;immune system process;localization;membrane organization;metabolic process;organelle organization;pigment granule organization;pig…	cell part;Golgi apparatus;intracellular membrane-bounded organelle;intracellular organelle;macromolecular complex;membrane;nucleoplasm;organelle;protein complex	Lysosome	Adaptin_N;BLVR	ACATTCC,MIR-1,MIR-206;BENPORATH_CYCLING_GENES;BIOSYNTHETIC_PROCESS;CACGTG_V$MYC_Q2;CAGCTG_V$AP4_Q5;CELLULAR_BIOSYNTHETIC_PROCESS;CELLULAR_LOCALIZATION;CGCTGCT,MIR-503;CHIARETTI_ACUTE_LYMPHOBLASTIC_LEUKEMIA_ZAP70;chr19p13;CYTOPLASM;CYTOPLASMIC_PART;ESTABLISHMENT_OF_CELLULAR_LOCALIZATION;ESTABLISHMENT_OF_LOCALIZATION;ESTABLISHMENT_OF_PROTEIN_LOCALIZATION;FLECHNER_BIOPSY_KIDNEY_TRANSPLANT_OK_VS_DONO…	3D-structure;Acetylation;Alternativesplicing;Coiledcoil;Completeproteome;Cytoplasm;Golgiapparatus;Membrane;Phosphoprotein;Polymorphism;Proteintransport;Referenceproteome;Repeat;Transport	AP3 adapter complex;AP3-BLOC1 complex;AP3D1-AP3S1 complex;AP3D1-AP3S2 complex	Casein kinase II substrate motif;DNA dependent Protein kinase substrate motif;G protein-coupled receptor kinase 1 substrate motif;PKA kinase substrate motif;PKC kinase substrate motif;Pyruvate dehydrogenase kinase substrate motif	+	HTP	1	1.23705e-14	126.8	126.8	98.062	-0.81937	177320000	119090000	58226000	658	98.0621
0.265631	NaN	-0.871728	-0.949287	0.329775	0.0713298	-0.0816903	-0.0644631	0.622046	-0.329742	0.0574086	-0.184088	-0.321777	-0.258382	0.186563	0.129068	0.170872	0.145012	0.854712	0.00343338	0.0574086	0.0539752	0.385302	S	3	___1	biological regulation;biosynthetic process;cellular biosynthetic process;cellular component organization;cellular component organization at cellular level;cellular component organization or biogenesis;cellular component organization or biogenesis at cellular level;cellular macromolecule biosynthetic process;cellular macromolecule metabolic process;cellular metabolic process;cellular nitrogen comp…	adenyl nucleotide binding;adenyl ribonucleotide binding;ATP binding;ATPase activity;ATPase activity, coupled;ATP-dependent DNA helicase activity;ATP-dependent helicase activity;binding;catalytic activity;DNA binding;DNA helicase activity;DNA-dependent ATPase activity;helicase activity;histone binding;hydrolase activity;hydrolase activity, acting on acid anhydrides;hydrolase activity, acting on ac…	cell part;cytoplasm;intracellular membrane-bounded organelle;intracellular organelle;intracellular part;membrane-bounded organelle;nucleus;organelle	biological regulation;biosynthetic process;cellular component organization;cellular metabolic process;cellular nitrogen compound metabolic process;cellular process;chromatin modification;chromatin organization;chromosome organization;DNA geometric change;DNA metabolic process;interspecies interaction between organisms;macromolecule metabolic process;metabolic process;multi-organism process;nitrog…	cell part;cytoplasm;intracellular membrane-bounded organelle;intracellular organelle;nucleus;organelle		Chromo;DUF4208;Helicase_C;SNF2_N	ACEVEDO_NORMAL_TISSUE_ADJACENT_TO_LIVER_TUMOR_UP;ATP_DEPENDENT_DNA_HELICASE_ACTIVITY;ATP_DEPENDENT_HELICASE_ACTIVITY;ATPASE_ACTIVITY;ATPASE_ACTIVITY_COUPLED;BASSO_CD40_SIGNALING_UP;BERENJENO_TRANSFORMED_BY_RHOA_FOREVER_DN;BERENJENO_TRANSFORMED_BY_RHOA_UP;BIOPOLYMER_METABOLIC_PROCESS;BLALOCK_ALZHEIMERS_DISEASE_UP;BOCHKIS_FOXA2_TARGETS;BROWNE_HCMV_INFECTION_16HR_UP;BYSTRYKH_HEMATOPOIESIS_STEM_CELL_…	3D-structure;Alternativesplicing;ATP-binding;Chromatinregulator;Completeproteome;Cytoplasm;DNA-binding;Helicase;Hydrolase;Nucleotide-binding;Nucleus;Phosphoprotein;Polymorphism;Referenceproteome;Repeat;Transcription;Transcriptionregulation		Casein kinase II substrate motif;ERK1,2 kinase substrate motif;Growth associated histone HI kinase substrate motif;GSK-3, ERK1, ERK2, CDK5 substrate motif;MAPKAPK2 kinase substrate motif;Pyruvate dehydrogenase kinase substrate motif;WW domain binding motif	+	CST;HTP	0.998841	8.15851e-10	106.35	90.414	84.41	0.19962	411670000	262270000	149400000	1677	32.0381
NaN	NaN	NaN	-0.833612	-0.0304694	-0.221892	0.0657162	NaN	0.816073	0.149646	-0.324082	0.150692	0.2984	-1.13797	-0.0204379	-0.361636	-0.524278	0.584162	0.781536	-0.0304694	-0.0204379	0.0100315	0.430848	S	2	___1	biological regulation;biosynthetic process;cellular biosynthetic process;cellular component organization;cellular component organization at cellular level;cellular component organization or biogenesis;cellular component organization or biogenesis at cellular level;cellular macromolecule biosynthetic process;cellular macromolecule metabolic process;cellular metabolic process;cellular nitrogen comp…	adenyl nucleotide binding;adenyl ribonucleotide binding;ATP binding;ATPase activity;ATPase activity, coupled;ATP-dependent DNA helicase activity;ATP-dependent helicase activity;binding;catalytic activity;DNA binding;DNA helicase activity;DNA-dependent ATPase activity;helicase activity;histone binding;hydrolase activity;hydrolase activity, acting on acid anhydrides;hydrolase activity, acting on ac…	cell part;cytoplasm;intracellular membrane-bounded organelle;intracellular organelle;intracellular part;membrane-bounded organelle;nucleus;organelle	biological regulation;biosynthetic process;cellular component organization;cellular metabolic process;cellular nitrogen compound metabolic process;cellular process;chromatin modification;chromatin organization;chromosome organization;DNA geometric change;DNA metabolic process;interspecies interaction between organisms;macromolecule metabolic process;metabolic process;multi-organism process;nitrog…	cell part;cytoplasm;intracellular membrane-bounded organelle;intracellular organelle;nucleus;organelle		Chromo;DUF4208;Helicase_C;SNF2_N	ACEVEDO_NORMAL_TISSUE_ADJACENT_TO_LIVER_TUMOR_UP;ATP_DEPENDENT_DNA_HELICASE_ACTIVITY;ATP_DEPENDENT_HELICASE_ACTIVITY;ATPASE_ACTIVITY;ATPASE_ACTIVITY_COUPLED;BASSO_CD40_SIGNALING_UP;BERENJENO_TRANSFORMED_BY_RHOA_FOREVER_DN;BERENJENO_TRANSFORMED_BY_RHOA_UP;BIOPOLYMER_METABOLIC_PROCESS;BLALOCK_ALZHEIMERS_DISEASE_UP;BOCHKIS_FOXA2_TARGETS;BROWNE_HCMV_INFECTION_16HR_UP;BYSTRYKH_HEMATOPOIESIS_STEM_CELL_…	3D-structure;Alternativesplicing;ATP-binding;Chromatinregulator;Completeproteome;Cytoplasm;DNA-binding;Helicase;Hydrolase;Nucleotide-binding;Nucleus;Phosphoprotein;Polymorphism;Referenceproteome;Repeat;Transcription;Transcriptionregulation		Casein kinase II substrate motif;ERK1,2 kinase substrate motif;Growth associated histone HI kinase substrate motif;GSK-3, ERK1, ERK2, CDK5 substrate motif;WW domain binding motif	+	CST;HTP	1	9.7097e-14	128.95	108.35	96.745	1.0635	250480000	161000000	89483000	1689	63.8119
0.265631	NaN	-0.871728	-0.949287	0.329775	0.0713298	-0.0816903	-0.0644631	0.622046	-0.329742	0.0574086	-0.184088	-0.321777	-0.258382	0.186563	0.129068	0.170872	0.145012	0.854712	0.00343338	0.0574086	0.0539752	0.385302	S	3	___1	biological regulation;biosynthetic process;cellular biosynthetic process;cellular component organization;cellular component organization at cellular level;cellular component organization or biogenesis;cellular component organization or biogenesis at cellular level;cellular macromolecule biosynthetic process;cellular macromolecule metabolic process;cellular metabolic process;cellular nitrogen comp…	adenyl nucleotide binding;adenyl ribonucleotide binding;ATP binding;ATPase activity;ATPase activity, coupled;ATP-dependent DNA helicase activity;ATP-dependent helicase activity;binding;catalytic activity;DNA binding;DNA helicase activity;DNA-dependent ATPase activity;helicase activity;histone binding;hydrolase activity;hydrolase activity, acting on acid anhydrides;hydrolase activity, acting on ac…	cell part;cytoplasm;intracellular membrane-bounded organelle;intracellular organelle;intracellular part;membrane-bounded organelle;nucleus;organelle	biological regulation;biosynthetic process;cellular component organization;cellular metabolic process;cellular nitrogen compound metabolic process;cellular process;chromatin modification;chromatin organization;chromosome organization;DNA geometric change;DNA metabolic process;interspecies interaction between organisms;macromolecule metabolic process;metabolic process;multi-organism process;nitrog…	cell part;cytoplasm;intracellular membrane-bounded organelle;intracellular organelle;nucleus;organelle		Chromo;DUF4208;Helicase_C;SNF2_N	ACEVEDO_NORMAL_TISSUE_ADJACENT_TO_LIVER_TUMOR_UP;ATP_DEPENDENT_DNA_HELICASE_ACTIVITY;ATP_DEPENDENT_HELICASE_ACTIVITY;ATPASE_ACTIVITY;ATPASE_ACTIVITY_COUPLED;BASSO_CD40_SIGNALING_UP;BERENJENO_TRANSFORMED_BY_RHOA_FOREVER_DN;BERENJENO_TRANSFORMED_BY_RHOA_UP;BIOPOLYMER_METABOLIC_PROCESS;BLALOCK_ALZHEIMERS_DISEASE_UP;BOCHKIS_FOXA2_TARGETS;BROWNE_HCMV_INFECTION_16HR_UP;BYSTRYKH_HEMATOPOIESIS_STEM_CELL_…	3D-structure;Alternativesplicing;ATP-binding;Chromatinregulator;Completeproteome;Cytoplasm;DNA-binding;Helicase;Hydrolase;Nucleotide-binding;Nucleus;Phosphoprotein;Polymorphism;Referenceproteome;Repeat;Transcription;Transcriptionregulation		Casein kinase II substrate motif;ERK1,2 kinase substrate motif;Growth associated histone HI kinase substrate motif;GSK-3, ERK1, ERK2, CDK5 substrate motif;MAPKAPK2 kinase substrate motif;Pyruvate dehydrogenase kinase substrate motif;WW domain binding motif	+	HTP	0.998841	8.15851e-10	106.35	90.414	84.41	0.19962	387350000	250420000	136930000	1677	32.0381
NaN	NaN	NaN	-0.833612	-0.0304694	-0.221892	0.0657162	0.252106	0.816073	0.149646	-0.324082	0.150692	0.2984	-1.13797	-0.0204379	-0.361636	-0.524278	0.584162	0.629018	0.0176234	-0.0204379	-0.0380613	0.48175	S	2	___1	biological regulation;biosynthetic process;cellular biosynthetic process;cellular component organization;cellular component organization at cellular level;cellular component organization or biogenesis;cellular component organization or biogenesis at cellular level;cellular macromolecule biosynthetic process;cellular macromolecule metabolic process;cellular metabolic process;cellular nitrogen comp…	adenyl nucleotide binding;adenyl ribonucleotide binding;ATP binding;ATPase activity;ATPase activity, coupled;ATP-dependent DNA helicase activity;ATP-dependent helicase activity;binding;catalytic activity;DNA binding;DNA helicase activity;DNA-dependent ATPase activity;helicase activity;histone binding;hydrolase activity;hydrolase activity, acting on acid anhydrides;hydrolase activity, acting on ac…	cell part;cytoplasm;intracellular membrane-bounded organelle;intracellular organelle;intracellular part;membrane-bounded organelle;nucleus;organelle	biological regulation;biosynthetic process;cellular component organization;cellular metabolic process;cellular nitrogen compound metabolic process;cellular process;chromatin modification;chromatin organization;chromosome organization;DNA geometric change;DNA metabolic process;interspecies interaction between organisms;macromolecule metabolic process;metabolic process;multi-organism process;nitrog…	cell part;cytoplasm;intracellular membrane-bounded organelle;intracellular organelle;nucleus;organelle		Chromo;DUF4208;Helicase_C;SNF2_N	ACEVEDO_NORMAL_TISSUE_ADJACENT_TO_LIVER_TUMOR_UP;ATP_DEPENDENT_DNA_HELICASE_ACTIVITY;ATP_DEPENDENT_HELICASE_ACTIVITY;ATPASE_ACTIVITY;ATPASE_ACTIVITY_COUPLED;BASSO_CD40_SIGNALING_UP;BERENJENO_TRANSFORMED_BY_RHOA_FOREVER_DN;BERENJENO_TRANSFORMED_BY_RHOA_UP;BIOPOLYMER_METABOLIC_PROCESS;BLALOCK_ALZHEIMERS_DISEASE_UP;BOCHKIS_FOXA2_TARGETS;BROWNE_HCMV_INFECTION_16HR_UP;BYSTRYKH_HEMATOPOIESIS_STEM_CELL_…	3D-structure;Alternativesplicing;ATP-binding;Chromatinregulator;Completeproteome;Cytoplasm;DNA-binding;Helicase;Hydrolase;Nucleotide-binding;Nucleus;Phosphoprotein;Polymorphism;Referenceproteome;Repeat;Transcription;Transcriptionregulation		Casein kinase II substrate motif;ERK1,2 kinase substrate motif;Growth associated histone HI kinase substrate motif;GSK-3, ERK1, ERK2, CDK5 substrate motif;WW domain binding motif	+	HTP	1	3.97651e-10	107.53	83.818	96.745	1.0635	238280000	150810000	87465000	1688	63.8119
NaN	0.0368069	NaN	0.132476	0.839992	1.08536	1.0964	1.26051	NaN	0.827716	0.344985	0.397076	NaN	0.908105	0.45846	0.691376	0.52538	NaN	0.541457	0.962674	0.52538	-0.437294	0.145626	S	3	___1	anatomical structure development;biological regulation;biosynthetic process;cell differentiation;cellular biosynthetic process;cellular component organization;cellular component organization at cellular level;cellular component organization or biogenesis;cellular component organization or biogenesis at cellular level;cellular developmental process;cellular macromolecule biosynthetic process;cellu…	adenyl nucleotide binding;adenyl ribonucleotide binding;ATP binding;ATPase activity;ATPase activity, coupled;ATP-dependent DNA helicase activity;ATP-dependent helicase activity;binding;catalytic activity;core promoter binding;core promoter sequence-specific DNA binding;DNA binding;DNA helicase activity;DNA-dependent ATPase activity;helicase activity;histone binding;hydrolase activity;hydrolase ac…	cell part;extracellular membrane-bounded organelle;extracellular organelle;extracellular region part;extracellular vesicular exosome;intracellular membrane-bounded organelle;intracellular non-membrane-bounded organelle;intracellular organelle;intracellular organelle part;intracellular part;membrane-bounded organelle;membrane-bounded vesicle;non-membrane-bounded organelle;nuclear part;nucleolus;nu…	anatomical structure development;biological regulation;biosynthetic process;cell differentiation;cellular component organization;cellular metabolic process;cellular nitrogen compound metabolic process;cellular process;chromatin modification;chromatin organization;chromosome organization;developmental process;DNA geometric change;DNA metabolic process;macromolecule metabolic process;metabolic proc…	cell part;extracellular organelle;intracellular membrane-bounded organelle;intracellular non-membrane-bounded organelle;intracellular organelle;nucleolus;nucleoplasm;nucleus;organelle;vesicle		Chromo;DUF4208;Helicase_C;SNF2_N	AAANWWTGC_UNKNOWN;AACTTT_UNKNOWN;AMUNDSON_RESPONSE_TO_ARSENITE;ATP_DEPENDENT_DNA_HELICASE_ACTIVITY;ATP_DEPENDENT_HELICASE_ACTIVITY;ATPASE_ACTIVITY;ATPASE_ACTIVITY_COUPLED;BENPORATH_NANOG_TARGETS;BIOPOLYMER_METABOLIC_PROCESS;BLALOCK_ALZHEIMERS_DISEASE_INCIPIENT_UP;BLALOCK_ALZHEIMERS_DISEASE_UP;BRCA1_DN.V1_DN;BRUINS_UVC_RESPONSE_EARLY_LATE;CAGGTG_V$E12_Q6;CCAWYNNGAAR_UNKNOWN;CHARAFE_BREAST_CANCER_L…	Alternativesplicing;ATP-binding;Chromatinregulator;Completeproteome;Diseasemutation;DNA-binding;Epilepsy;Helicase;Hydrolase;Myogenesis;Nucleotide-binding;Nucleus;Phosphoprotein;Polymorphism;Referenceproteome;Repeat;Transcription;Transcriptionregulation		Casein kinase I substrate motif;Casein kinase II substrate motif;ERK1,2 kinase substrate motif;Growth associated histone HI kinase substrate motif;GSK-3, ERK1, ERK2, CDK5 substrate motif;WW domain binding motif	+	CST;HTP	0.999851	4.76738e-05	88.706	88.706	71.545	-0.034393	43454000	29695000	13760000	1807	38.2798
-1.68201	-0.63101	-0.386493	0.0174288	-3.0633	NaN	-3.20173	-1.30613	NaN	-3.39459	0.371784	-0.421153	-2.05265	-2.18975	-0.876407	-1.11227	-0.402986	-2.91555	0.97425	-1.30613	-1.11227	0.193866	0.252953	S	2	___1	biological regulation;negative regulation of biological process;negative regulation of cell proliferation;negative regulation of cellular process;regulation of biological process;regulation of cell proliferation;regulation of cellular process;response to stimulus;response to stress		cell part;integral to membrane;intrinsic to membrane;membrane part	biological regulation;response to stimulus;response to stress	cell part		p53-inducible11	BILANGES_SERUM_SENSITIVE_GENES;CELL_PROLIFERATION_GO_0008283;CHIBA_RESPONSE_TO_TSA_UP;chr11p11;DOUGLAS_BMI1_TARGETS_UP;EIF4E_UP;GGGAGGRR_V$MAZ_Q6;GGGCGGR_V$SP1_Q6;GSE12845_IGD_POS_BLOOD_VS_PRE_GC_TONSIL_BCELL_UP;GSE12845_NAIVE_VS_PRE_GC_TONSIL_BCELL_UP;GSE13306_TREG_VS_TCONV_SPLEEN_UP;GSE14350_IL2RB_KO_VS_WT_TEFF_DN;GSE15324_ELF4_KO_VS_WT_ACTIVATED_CD8_TCELL_DN;GSE20366_EX_VIVO_VS_HOMEOSTATIC_CON…	Completeproteome;Membrane;Phosphoprotein;Referenceproteome;Transmembrane;Transmembranehelix		AMP-activated protein kinase substrate motif;ATM kinase substrate motif;Calmodulin-dependent protein kinase II substrate motif;Casein kinase II substrate motif;Chk1 kinase substrate motif;DNA dependent Protein kinase substrate motif;HMGCoA Reductase kinase substrate motif;PKA kinase substrate motif;PKC kinase substrate motif;Pyruvate dehydrogenase kinase substrate motif	+	CST;HTP	0.999995	2.80437e-30	187.62	144.02	130.47	1.0356	1186000000	548620000	637370000	14	53.096
1.49133	1.45258	NaN	0.416076	2.29241	0.766833	1.03393	NaN	NaN	NaN	0.803326	0.947614	NaN	0.502953	NaN	0.665949	0.485669	2.03405	0.370822	1.24326	0.734637	-0.508618	0.105215	S	2	___1	biological regulation;biosynthetic process;cell growth;cellular biosynthetic process;cellular component organization;cellular component organization at cellular level;cellular component organization or biogenesis;cellular component organization or biogenesis at cellular level;cellular macromolecule biosynthetic process;cellular macromolecule metabolic process;cellular metabolic process;cellular n…	binding;catalytic activity;cation binding;DNA binding;histone methyltransferase activity;histone methyltransferase activity (H3-K4 specific);histone-lysine N-methyltransferase activity;ion binding;lysine N-methyltransferase activity;metal ion binding;methyltransferase activity;N-methyltransferase activity;nucleic acid binding;protein methyltransferase activity;protein-lysine N-methyltransferase a…	cell part;histone methyltransferase complex;intracellular membrane-bounded organelle;intracellular organelle;intracellular organelle part;intracellular part;macromolecular complex;membrane-bounded organelle;methyltransferase complex;nuclear part;nucleoplasm;nucleoplasm part;nucleus;organelle;organelle part;protein complex	biological regulation;biosynthetic process;cell growth;cellular component organization;cellular metabolic process;cellular nitrogen compound metabolic process;cellular process;chromatin modification;chromatin organization;chromosome organization;developmental process;gene silencing;growth;histone modification;macromolecule metabolic process;macromolecule modification;metabolic process;multicellul…	cell part;histone methyltransferase complex;intracellular membrane-bounded organelle;intracellular organelle;macromolecular complex;nucleoplasm;nucleus;organelle;protein complex		FYRC;FYRN;PHD;SET		3D-structure;Acetylation;Alternativesplicing;Chromatinregulator;Coiledcoil;Completeproteome;Diseasemutation;Mentalretardation;Metal-binding;Methyltransferase;Nucleus;Phosphoprotein;Polymorphism;Referenceproteome;Repeat;S-adenosyl-L-methionine;Transcription;Transcriptionregulation;Transferase;Zinc;Zinc-finger	ASCOM complex;MOF complex;UTX-MLL2/3 complex;WDR5-ASH2L-RBBP5-MLL2 complex	ERK1,2 kinase substrate motif;GSK-3, ERK1, ERK2, CDK5 substrate motif;PKA kinase substrate motif;PKC kinase substrate motif;WW domain binding motif	+	CST;HTP	0.999999	0.000670262	61.235	37.521	61.235	0.01197	64545000	47934000	16611000	654	58.5852
0.744323	0.718507	0.076057	0.322371	0.976613	0.804414	0.597102	0.757462	0.596657	0.427358	NaN	NaN	0.876991	0.183345	0.473069	0.359483	0.418631	1.20487	0.724882	0.718507	0.427358	-0.291149	0.25729	S	2	___1	biological regulation;biosynthetic process;cell growth;cellular biosynthetic process;cellular component organization;cellular component organization at cellular level;cellular component organization or biogenesis;cellular component organization or biogenesis at cellular level;cellular macromolecule biosynthetic process;cellular macromolecule metabolic process;cellular metabolic process;cellular n…	binding;catalytic activity;cation binding;DNA binding;histone methyltransferase activity;histone methyltransferase activity (H3-K4 specific);histone-lysine N-methyltransferase activity;ion binding;lysine N-methyltransferase activity;metal ion binding;methyltransferase activity;N-methyltransferase activity;nucleic acid binding;protein methyltransferase activity;protein-lysine N-methyltransferase a…	cell part;histone methyltransferase complex;intracellular membrane-bounded organelle;intracellular organelle;intracellular organelle part;intracellular part;macromolecular complex;membrane-bounded organelle;methyltransferase complex;nuclear part;nucleoplasm;nucleoplasm part;nucleus;organelle;organelle part;protein complex	biological regulation;biosynthetic process;cell growth;cellular component organization;cellular metabolic process;cellular nitrogen compound metabolic process;cellular process;chromatin modification;chromatin organization;chromosome organization;developmental process;gene silencing;growth;histone modification;macromolecule metabolic process;macromolecule modification;metabolic process;multicellul…	cell part;histone methyltransferase complex;intracellular membrane-bounded organelle;intracellular organelle;macromolecular complex;nucleoplasm;nucleus;organelle;protein complex		FYRC;FYRN;PHD;SET		3D-structure;Acetylation;Alternativesplicing;Chromatinregulator;Coiledcoil;Completeproteome;Diseasemutation;Mentalretardation;Metal-binding;Methyltransferase;Nucleus;Phosphoprotein;Polymorphism;Referenceproteome;Repeat;S-adenosyl-L-methionine;Transcription;Transcriptionregulation;Transferase;Zinc;Zinc-finger	ASCOM complex;MOF complex;UTX-MLL2/3 complex;WDR5-ASH2L-RBBP5-MLL2 complex	ERK1,2 kinase substrate motif;G protein-coupled receptor kinase 1 substrate motif;GSK-3, ERK1, ERK2, CDK5 substrate motif;PKA kinase substrate motif;PKC kinase substrate motif;WW domain binding motif	+	HTP	1	6.46233e-10	79.467	75.605	79.467	0.36939	188170000	137240000	50934000	4359	74.4663
-1.53409	-1.14267	-1.04266	-0.948464	-1.48102	0.0876296	-1.66458	-1.3417	-1.06732	-1.16186	-0.81611	-1.52981	-1.59836	-1.44466	-1.14315	-1.60083	-0.741563	-2.06108	0.341246	-1.14267	-1.44466	-0.301993	0.247723	S	2	___1	biological regulation;cellular process;cellular response to chemical stimulus;cellular response to endogenous stimulus;cellular response to growth factor stimulus;cellular response to organic substance;cellular response to stimulus;cellular response to transforming growth factor beta stimulus;negative regulation of biological process;negative regulation of cell proliferation;negative regulation o…	acetyltransferase activator activity;beta-tubulin binding;binding;carbohydrate binding;cytoskeletal protein binding;DNA binding;enzyme activator activity;enzyme regulator activity;glycosaminoglycan binding;heparin binding;nucleic acid binding;pattern binding;polysaccharide binding;protein binding;tubulin binding	cell part;cytoplasm;extracellular membrane-bounded organelle;extracellular organelle;extracellular region part;extracellular vesicular exosome;intracellular membrane-bounded organelle;intracellular organelle;intracellular part;membrane-bounded organelle;membrane-bounded vesicle;nucleus;organelle;vesicle	biological regulation;cellular process;regulation of organelle organization;response to chemical stimulus;response to endogenous stimulus;response to stimulus	cell part;cytoplasm;extracellular organelle;intracellular membrane-bounded organelle;intracellular organelle;nucleus;organelle;vesicle		dsDNA_bind	AACTTT_UNKNOWN;ACEVEDO_LIVER_TUMOR_VS_NORMAL_ADJACENT_TISSUE_UP;APOPTOSIS_GO;BENPORATH_PROLIFERATION;BLALOCK_ALZHEIMERS_DISEASE_DN;BONOME_OVARIAN_CANCER_SURVIVAL_SUBOPTIMAL_DEBULKING;CELL_DEVELOPMENT;chr19q12;DARWICHE_PAPILLOMA_RISK_HIGH_UP;DARWICHE_PAPILLOMA_RISK_LOW_UP;DARWICHE_SKIN_TUMOR_PROMOTER_UP;DARWICHE_SQUAMOUS_CELL_CARCINOMA_UP;DODD_NASOPHARYNGEAL_CARCINOMA_DN;FARMER_BREAST_CANCER_APOCR…	3D-structure;Acetylation;Alternativesplicing;Apoptosis;Completeproteome;Directproteinsequencing;Phosphoprotein;Referenceproteome		b-Adrenergic Receptor kinase substrate motif;Casein kinase II substrate motif;PKA kinase substrate motif;Pyruvate dehydrogenase kinase substrate motif	+	CST;HTP;LTP	1	7.8383e-06	111.83	111.83	101.61	0.3093	530410000	239050000	291360000	119	89.3399
NaN	NaN	NaN	1.04446	-0.152466	0.874513	0.774006	1.31095	NaN	0.207027	1.41735	0.603613	0.553796	0.748442	0.970486	NaN	1.87491	NaN	0.678457	0.874513	0.748442	-0.126072	0.422396	S	2	___1	acid secretion;actin cytoskeleton organization;actin filament-based process;activation of adenylate cyclase activity;activation of adenylate cyclase activity by dopamine receptor signaling pathway;activation of adenylate cyclase activity by G-protein signaling pathway;activation of phospholipase C activity;activation of phospholipase C activity by dopamine receptor signaling pathway;activation of…	adrenergic receptor binding;beta-2 adrenergic receptor binding;beta-catenin binding;binding;channel regulator activity;chloride channel regulator activity;enzyme binding;G-protein-coupled receptor binding;growth factor receptor binding;PDZ domain binding;phosphatase binding;protein binding;protein domain specific binding;protein self-association;receptor binding	actin cytoskeleton;apical plasma membrane;brush border membrane;cell part;cell periphery;cell projection;cell projection membrane;cell projection part;centrosome;cytoplasm;cytoplasmic part;cytoskeletal part;cytoskeleton;endomembrane system;extracellular membrane-bounded organelle;extracellular organelle;extracellular region part;extracellular vesicular exosome;filopodium;intracellular membrane-bo…	amine transport;amino acid transport;biological regulation;cellular component assembly;cellular component organization;cellular homeostasis;cellular ion homeostasis;cellular localization;cellular process;cytoskeleton organization;establishment of localization;homeostatic process;ion transport;localization;macromolecular complex assembly;multicellular organismal process;organelle organization;orga…	cell part;cell projection;centrosome;cytoplasm;cytoskeleton;endomembrane system;extracellular organelle;filopodium;intracellular membrane-bounded organelle;intracellular non-membrane-bounded organelle;intracellular organelle;membrane;microtubule organizing center;microvillus;organelle;plasma membrane;vesicle		EBP50_C-term;PDZ	ACTIN_CYTOSKELETON;ACTWSNACTNY_UNKNOWN;BHAT_ESR1_TARGETS_NOT_VIA_AKT1_UP;BHAT_ESR1_TARGETS_VIA_AKT1_UP;BILD_E2F3_ONCOGENIC_SIGNATURE;BIOCARTA_CFTR_PATHWAY;BLUM_RESPONSE_TO_SALIRASIB_DN;BROWNE_HCMV_INFECTION_16HR_UP;CAGGTG_V$E12_Q6;CELLULAR_COMPONENT_ASSEMBLY;CHARAFE_BREAST_CANCER_LUMINAL_VS_BASAL_UP;CHARAFE_BREAST_CANCER_LUMINAL_VS_MESENCHYMAL_UP;chr17q24;COULOUARN_TEMPORAL_TGFB1_SIGNATURE_DN;CYT…	3D-structure;Acetylation;Alternativesplicing;Cellmembrane;Cellprojection;Completeproteome;Cytoplasm;Directproteinsequencing;Diseasemutation;Membrane;Phosphoprotein;Polymorphism;Referenceproteome;Repeat;Wntsignalingpathway	(C-CFTR)2-NHERF-ezrin complex;C-CFTR-NHERF(PDZ1 domain)-ezrin complex;C-CFTR-NHERF(PDZ2 domain)-ezrin complex;CFTR-NHERF-beta(2)AR signaling complex	14-3-3 domain binding motif;Calmodulin-dependent protein kinase II substrate motif;Calmodulin-dependent protein kinase IV substrate motif;Casein kinase II substrate motif;Chk1 kinase substrate motif;G protein-coupled receptor kinase 1 substrate motif;GSK3 kinase substrate motif;PKA kinase substrate motif;PKC kinase substrate motif	+	CST;HTP;LTP	0.998779	2.01153e-265	346.03	346.03	274.17	-0.79348	546790000	416580000	130210000	290	31.2678
-0.108944	1.49239	0.222555	1.60451	1.54943	NaN	0.654407	1.36281	NaN	-0.785413	NaN	1.37725	NaN	0.546033	0.839784	-0.143376	NaN	0.894687	0.246499	1.36281	0.692908	-0.669898	0.0447682	S	4	___1	cellular process;establishment of localization;establishment of localization in cell;establishment of protein localization;Golgi vesicle transport;intracellular transport;post-Golgi vesicle-mediated transport;protein transport;response to chemical stimulus;response to external stimulus;response to extracellular stimulus;response to nutrient;response to nutrient levels;response to retinoic acid;re…	binding;enzyme binding;protein binding;ubiquitin protein ligase binding	cell part;cytoplasmic part;extracellular membrane-bounded organelle;extracellular organelle;extracellular region part;extracellular vesicular exosome;Golgi apparatus part;Golgi membrane;integral to membrane;intracellular organelle part;intracellular part;intrinsic to membrane;membrane;membrane part;membrane-bounded organelle;membrane-bounded vesicle;organelle;organelle membrane;organelle part;ves…	cellular process;establishment of localization;Golgi vesicle transport;protein transport;response to chemical stimulus;response to external stimulus;response to extracellular stimulus;response to stimulus;transport;vesicle-mediated transport	cell part;extracellular organelle;membrane;organelle;vesicle		SCAMP	AACTGGA,MIR-145;ACEVEDO_LIVER_TUMOR_VS_NORMAL_ADJACENT_TISSUE_UP;ACTAYRNNNCCCR_UNKNOWN;ALCALA_APOPTOSIS;BENPORATH_MYC_MAX_TARGETS;BLALOCK_ALZHEIMERS_DISEASE_UP;BORCZUK_MALIGNANT_MESOTHELIOMA_UP;BOYAULT_LIVER_CANCER_SUBCLASS_G12_UP;CACGTG_V$MYC_Q2;CAGGTA_V$AREB6_01;CAGGTG_V$E12_Q6;CELLULAR_LOCALIZATION;CHIANG_LIVER_CANCER_SUBCLASS_UNANNOTATED_DN;chr1q21;CTTTGA_V$LEF1_Q2;CTTTGT_V$LEF1_Q2;DANG_BOUND…	Alternativesplicing;Completeproteome;Membrane;Phosphoprotein;Polymorphism;Proteintransport;Referenceproteome;Transmembrane;Transmembranehelix;Transport;Ublconjugation	SCAMP1-SCAMP2-SCAMP3 complex	Casein kinase II substrate motif;DNA dependent Protein kinase substrate motif;G protein-coupled receptor kinase 1 substrate motif;PKA kinase substrate motif;PKC kinase substrate motif	+	CST;HTP	1	2.41807e-74	175.3	168.83	116.62	0.30029	393180000	322950000	70227000	32	90.2198
-0.0426898	-1.25514	-0.875402	-1.79288	0.414725	-0.868037	-0.904834	-1.09611	-0.646248	-0.411155	-1.42063	-1.55455	-1.1614	-1.83468	-1.31863	NaN	-1.77998	-0.98049	0.074345	-0.875402	-1.36963	-0.49423	0.112633	S	2	___1	cellular process;establishment of localization;establishment of localization in cell;establishment of protein localization;Golgi vesicle transport;intracellular transport;post-Golgi vesicle-mediated transport;protein transport;response to chemical stimulus;response to external stimulus;response to extracellular stimulus;response to nutrient;response to nutrient levels;response to retinoic acid;re…	binding;enzyme binding;protein binding;ubiquitin protein ligase binding	cell part;cytoplasmic part;extracellular membrane-bounded organelle;extracellular organelle;extracellular region part;extracellular vesicular exosome;Golgi apparatus part;Golgi membrane;integral to membrane;intracellular organelle part;intracellular part;intrinsic to membrane;membrane;membrane part;membrane-bounded organelle;membrane-bounded vesicle;organelle;organelle membrane;organelle part;ves…	cellular process;establishment of localization;Golgi vesicle transport;protein transport;response to chemical stimulus;response to external stimulus;response to extracellular stimulus;response to stimulus;transport;vesicle-mediated transport	cell part;extracellular organelle;membrane;organelle;vesicle		SCAMP	AACTGGA,MIR-145;ACEVEDO_LIVER_TUMOR_VS_NORMAL_ADJACENT_TISSUE_UP;ACTAYRNNNCCCR_UNKNOWN;ALCALA_APOPTOSIS;BENPORATH_MYC_MAX_TARGETS;BLALOCK_ALZHEIMERS_DISEASE_UP;BORCZUK_MALIGNANT_MESOTHELIOMA_UP;BOYAULT_LIVER_CANCER_SUBCLASS_G12_UP;CACGTG_V$MYC_Q2;CAGGTA_V$AREB6_01;CAGGTG_V$E12_Q6;CELLULAR_LOCALIZATION;CHIANG_LIVER_CANCER_SUBCLASS_UNANNOTATED_DN;chr1q21;CTTTGA_V$LEF1_Q2;CTTTGT_V$LEF1_Q2;DANG_BOUND…	Alternativesplicing;Completeproteome;Membrane;Phosphoprotein;Polymorphism;Proteintransport;Referenceproteome;Transmembrane;Transmembranehelix;Transport;Ublconjugation	SCAMP1-SCAMP2-SCAMP3 complex	14-3-3 domain binding motif;Calmodulin-dependent protein kinase II substrate motif;Casein kinase II substrate motif;ERK1,2 kinase substrate motif;G protein-coupled receptor kinase 1 substrate motif;GSK-3, ERK1, ERK2, CDK5 substrate motif;MAPKAPK2 kinase substrate motif;PKA kinase substrate motif;PKC epsilon kinase substrate motif;PKC kinase substrate motif;WW domain binding motif	+	CST;HTP	0.995371	0.00407648	82.954	47.412	74.611	1.8949	616830000	319810000	297020000	76	23.3247
-2.11911	-1.48757	-3.8982	-2.55236	-2.52612	-1.64487	-2.89474	-2.28121	-1.75202	-3.24195	-1.82319	-2.39305	-4.05924	-4.06626	-2.24671	-2.3137	-2.34366	-2.29036	0.294467	-2.28121	-2.34366	-0.0624495	0.492006	S	2	___1	biological regulation;cellular component assembly;cellular component assembly at cellular level;cellular component organization;cellular component organization at cellular level;cellular component organization or biogenesis;cellular component organization or biogenesis at cellular level;cellular macromolecular complex assembly;cellular macromolecular complex subunit organization;cellular macromol…	acetyltransferase activity;catalytic activity;H4 histone acetyltransferase activity;histone acetyltransferase activity;lysine N-acetyltransferase activity;N-acetyltransferase activity;N-acyltransferase activity;transferase activity;transferase activity, transferring acyl groups;transferase activity, transferring acyl groups other than amino-acyl groups	cell part;chromatin;chromosomal part;cytoplasm;intracellular membrane-bounded organelle;intracellular organelle;intracellular organelle part;intracellular part;macromolecular complex;membrane-bounded organelle;nuclear chromatin;nuclear chromosome part;nuclear matrix;nuclear part;nucleoplasm;nucleus;organelle;organelle part;protein complex	biological regulation;cellular component assembly;cellular component organization;cellular macromolecular complex assembly;cellular metabolic process;cellular nitrogen compound metabolic process;cellular process;chromatin modification;chromatin organization;chromosome organization;DNA metabolic process;DNA packaging;gene silencing;histone modification;macromolecular complex assembly;macromolecule…	cell part;cytoplasm;intracellular membrane-bounded organelle;intracellular organelle;macromolecular complex;nucleoplasm;nucleus;organelle;protein complex		Hat1_N	AACTTT_UNKNOWN;ACETYLTRANSFERASE_ACTIVITY;ACEVEDO_LIVER_CANCER_WITH_H3K9ME3_DN;ATACTGT,MIR-144;BASAKI_YBX1_TARGETS_UP;BERENJENO_TRANSFORMED_BY_RHOA_UP;BIOPOLYMER_METABOLIC_PROCESS;BIOPOLYMER_MODIFICATION;BOYAULT_LIVER_CANCER_SUBCLASS_G123_UP;BROWNE_HCMV_INFECTION_48HR_UP;BRUINS_UVC_RESPONSE_LATE;BURTON_ADIPOGENESIS_PEAK_AT_16HR;BYSTRYKH_HEMATOPOIESIS_STEM_CELL_QTL_TRANS;CELLULAR_MACROMOLECULE_MET…	3D-structure;Acetylation;Acyltransferase;Alternativesplicing;Completeproteome;Cytoplasm;Nucleus;Polymorphism;Referenceproteome;Transferase	Histone H3.1 complex;Histone H3.3 complex	14-3-3 domain binding motif;AMP-activated protein kinase 2 substrate motif;Calmodulin-dependent protein kinase II substrate motif;Cdc2 kinase substrate motif;CDK kinase substrate motif;CDK1,2,4,6 kinase substrate motif;ERK1,2 kinase substrate motif;GSK-3, ERK1, ERK2, CDK5 substrate motif;MAPKAPK1 kinase substrate motif;PKA kinase substrate motif;PKC kinase substrate motif;WW domain binding motif;…	+	CST;HTP	0.999999	0.00779774	100.57	42.71	98.009	0.065988	228410000	56080000	172330000	361	62.7599
-0.435593	1.97452	NaN	1.75661	NaN	1.22221	0.045794	2.70772	0.606447	0.473546	2.2371	1.23571	1.12313	1.2133	1.61697	0.982551	1.90814	0.0633141	0.869877	1.22221	1.2133	-0.00890589	0.450803	S	3	___1	axon guidance;biological adhesion;biological regulation;cell adhesion;cell surface receptor linked signaling pathway;cell-cell adhesion;cellular process;cellular response to stimulus;chemotaxis;enzyme linked receptor protein signaling pathway;ephrin receptor signaling pathway;establishment of localization;establishment of localization in cell;establishment of protein localization;establishment of…	binding;calcium ion binding;cation binding;ion binding;metal ion binding;structural constituent of muscle;structural molecule activity	actin filament bundle;actomyosin;apical part of cell;cell part;contractile fiber part;cytoplasmic part;cytoskeletal part;cytosol;extracellular membrane-bounded organelle;extracellular organelle;extracellular region part;extracellular vesicular exosome;intracellular organelle part;intracellular part;macromolecular complex;membrane-bounded organelle;membrane-bounded vesicle;muscle myosin complex;my…	biological adhesion;biological regulation;cell adhesion;cellular process;establishment of localization;locomotion;multicellular organismal process;muscle contraction;protein targeting;protein transport;response to chemical stimulus;response to external stimulus;response to stimulus;signal transduction;transport	apical part of cell;cell part;cytosol;extracellular organelle;macromolecular complex;organelle;protein complex;vesicle	Focal adhesion;Leukocyte transendothelial migration;Regulation of actin cytoskeleton;Tight junction;Vascular smooth muscle contraction	EF-hand_1;EF-hand_7	AACTTT_UNKNOWN;ACEVEDO_FGFR1_TARGETS_IN_PROSTATE_CANCER_MODEL_DN;ACTIN_CYTOSKELETON;ALFANO_MYC_TARGETS;BAELDE_DIABETIC_NEPHROPATHY_DN;BASSO_B_LYMPHOCYTE_NETWORK;BCAT_BILD_ET_AL_UP;BERENJENO_TRANSFORMED_BY_RHOA_DN;BERTUCCI_MEDULLARY_VS_DUCTAL_BREAST_CANCER_DN;BLALOCK_ALZHEIMERS_DISEASE_DN;BONOME_OVARIAN_CANCER_SURVIVAL_OPTIMAL_DEBULKING;BOYLAN_MULTIPLE_MYELOMA_PCA3_DN;BROWNE_HCMV_INFECTION_48HR_DN…	Acetylation;Alternativesplicing;Calcium;Completeproteome;Metal-binding;Motorprotein;Muscleprotein;Myosin;Phosphoprotein;Polymorphism;Referenceproteome;Repeat	WIP-WASp-actin-myosin-IIa complex	14-3-3 domain binding motif;Calmodulin-dependent protein kinase II substrate motif;G protein-coupled receptor kinase 1 substrate motif;PKA kinase substrate motif;PKC kinase substrate motif	+	CST;HTP;LTP	1	1.87724e-61	192.09	183.05	124.51	0.54505	3795800000	3048200000	747630000	19	88.7014
-0.394802	0.852429	1.70419	1.7024	NaN	0.68787	1.13638	2.76013	-0.663086	1.29553	1.41962	0.765133	0.445224	1.01829	1.14332	0.661788	1.62892	-1.35971	0.703241	0.994404	1.01829	0.023891	0.416353	S	2	___1	biological regulation;cell cycle;cell cycle phase;cell cycle process;cellular component organization;cellular component organization at cellular level;cellular component organization or biogenesis;cellular component organization or biogenesis at cellular level;cellular macromolecule metabolic process;cellular metabolic process;cellular process;cellular protein metabolic process;cellular response …	14-3-3 protein binding;binding;enzyme binding;enzyme inhibitor activity;enzyme regulator activity;kinase binding;molecular transducer activity;phosphatase regulator activity;protein binding;protein kinase binding;signal transducer activity	actin cytoskeleton;adherens junction;anchoring junction;cell junction;cell part;cell-substrate adherens junction;cell-substrate junction;centrosome;chromosomal part;contractile fiber;cytoplasm;cytoplasmic part;cytoskeletal part;cytoskeleton;cytosol;focal adhesion;intracellular non-membrane-bounded organelle;intracellular organelle;intracellular organelle part;intracellular part;kinetochore;macrom…	biological regulation;cell cycle;cellular component organization;cellular metabolic process;cellular process;macromolecule metabolic process;macromolecule modification;metabolic process;microtubule organizing center organization;mitosis;mitotic cell cycle;nuclear division;organelle fission;organelle organization;phosphorus metabolic process;primary metabolic process;protein dephosphorylation;prot…	cell part;centrosome;cytoplasm;cytoskeleton;cytosol;intracellular non-membrane-bounded organelle;intracellular organelle;kinetochore;macromolecular complex;microtubule organizing center;nucleoplasm;organelle;protein complex;protein serine/threonine phosphatase complex	Focal adhesion;Long-term potentiation;Regulation of actin cytoskeleton;Vascular smooth muscle contraction	Ank	AACTTT_UNKNOWN;AATGTGA,MIR-23A,MIR-23B;AGUIRRE_PANCREATIC_CANCER_COPY_NUMBER_DN;ATGTTAA,MIR-302C;BENPORATH_MYC_MAX_TARGETS;BLALOCK_ALZHEIMERS_DISEASE_DN;BRUINS_UVC_RESPONSE_LATE;CAGTCAC,MIR-134;CATTTCA,MIR-203;CCAWWNAAGG_V$SRF_Q4;CHEN_HOXA5_TARGETS_9HR_UP;chr12q15;CTACTGT,MIR-199A;CTTTGT_V$LEF1_Q2;DACOSTA_UV_RESPONSE_VIA_ERCC3_COMMON_DN;DACOSTA_UV_RESPONSE_VIA_ERCC3_DN;DANG_BOUND_BY_MYC;DAZARD_RE…	3D-structure;Alternativesplicing;ANKrepeat;Completeproteome;Cytoplasm;Directproteinsequencing;Hydroxylation;Phosphoprotein;Polymorphism;Referenceproteome;Repeat	MRIP-MBS complex;MRIP-MBS-RHOA complex	AMP-activated protein kinase substrate motif;Calmodulin-dependent protein kinase II substrate motif;Chk1 kinase substrate motif;PKA kinase substrate motif;PKC kinase substrate motif	+	CST;HTP;LTP	0.999478	4.80248e-65	208.72	151.1	205.63	0.44876	683130000	540480000	142640000	445	32.8216
-0.113989	0.703586	0.656269	0.821868	NaN	1.09683	1.72337	NaN	NaN	0.886452	1.24361	0.0322014	0.313825	0.513489	0.933335	1.91201	1.57313	NaN	0.74418	0.762727	0.909893	0.147166	0.294428	S	2	___1	biological regulation;cell cycle;cell cycle phase;cell cycle process;cellular component organization;cellular component organization at cellular level;cellular component organization or biogenesis;cellular component organization or biogenesis at cellular level;cellular macromolecule metabolic process;cellular metabolic process;cellular process;cellular protein metabolic process;cellular response …	14-3-3 protein binding;binding;enzyme binding;enzyme inhibitor activity;enzyme regulator activity;kinase binding;molecular transducer activity;phosphatase regulator activity;protein binding;protein kinase binding;signal transducer activity	actin cytoskeleton;adherens junction;anchoring junction;cell junction;cell part;cell-substrate adherens junction;cell-substrate junction;centrosome;chromosomal part;contractile fiber;cytoplasm;cytoplasmic part;cytoskeletal part;cytoskeleton;cytosol;focal adhesion;intracellular non-membrane-bounded organelle;intracellular organelle;intracellular organelle part;intracellular part;kinetochore;macrom…	biological regulation;cell cycle;cellular component organization;cellular metabolic process;cellular process;macromolecule metabolic process;macromolecule modification;metabolic process;microtubule organizing center organization;mitosis;mitotic cell cycle;nuclear division;organelle fission;organelle organization;phosphorus metabolic process;primary metabolic process;protein dephosphorylation;prot…	cell part;centrosome;cytoplasm;cytoskeleton;cytosol;intracellular non-membrane-bounded organelle;intracellular organelle;kinetochore;macromolecular complex;microtubule organizing center;nucleoplasm;organelle;protein complex;protein serine/threonine phosphatase complex	Focal adhesion;Long-term potentiation;Regulation of actin cytoskeleton;Vascular smooth muscle contraction	Ank	AACTTT_UNKNOWN;AATGTGA,MIR-23A,MIR-23B;AGUIRRE_PANCREATIC_CANCER_COPY_NUMBER_DN;ATGTTAA,MIR-302C;BENPORATH_MYC_MAX_TARGETS;BLALOCK_ALZHEIMERS_DISEASE_DN;BRUINS_UVC_RESPONSE_LATE;CAGTCAC,MIR-134;CATTTCA,MIR-203;CCAWWNAAGG_V$SRF_Q4;CHEN_HOXA5_TARGETS_9HR_UP;chr12q15;CTACTGT,MIR-199A;CTTTGT_V$LEF1_Q2;DACOSTA_UV_RESPONSE_VIA_ERCC3_COMMON_DN;DACOSTA_UV_RESPONSE_VIA_ERCC3_DN;DANG_BOUND_BY_MYC;DAZARD_RE…	3D-structure;Alternativesplicing;ANKrepeat;Completeproteome;Cytoplasm;Directproteinsequencing;Hydroxylation;Phosphoprotein;Polymorphism;Referenceproteome;Repeat	MRIP-MBS complex;MRIP-MBS-RHOA complex	14-3-3 domain binding motif;Calmodulin-dependent protein kinase I substrate motif;Calmodulin-dependent protein kinase II alpha substrate motif;Calmodulin-dependent protein kinase II substrate motif;Calmodulin-dependent protein kinase IV substrate motif;Casein kinase II substrate motif;Chk1 kinase substrate motif;PKA kinase substrate motif;PKC kinase substrate motif	+	CST;HTP;LTP	0.999835	7.2035e-13	150.51	139.5	150.51	-0.27899	104900000	79964000	24940000	851	37.8667
1.49195	1.78819	NaN	1.15604	1.84735	0.861799	1.46903	1.05031	0.990714	1.96826	0.335066	1.63812	1.69676	1.36114	NaN	1.59786	0.28794	1.02714	0.727176	1.31253	1.4795	0.166964	0.276466	S	2	___1		binding;cation binding;ion binding;metal ion binding	cell part;intracellular membrane-bounded organelle;intracellular organelle;intracellular part;membrane-bounded organelle;nucleus;organelle		cell part;intracellular membrane-bounded organelle;intracellular organelle;nucleus;organelle			AAGCACA,MIR-218;AGTCAGC,MIR-345;ATGAAGG,MIR-205;CACCAGC,MIR-138;CAGTGTT,MIR-141,MIR-200A;CCAGGGG,MIR-331;CCCAGAG,MIR-326;CCTGCTG,MIR-214;chr15q22;CTATGCA,MIR-153;CTTTGTA,MIR-524;GACAATC,MIR-219;GAGCTGG,MIR-337;GCAAAAA,MIR-129;GGCAGAC,MIR-346;GGCAGCT,MIR-22;GSE18791_UNSTIM_VS_NEWCATSLE_VIRUS_DC_6H_UP;GSE22886_NAIVE_CD4_TCELL_VS_48H_ACT_TH1_UP;GSE22886_NAIVE_CD4_TCELL_VS_48H_ACT_TH2_UP;GSE25087_TRE…	Completeproteome;Metal-binding;Nucleus;Phosphoprotein;Referenceproteome;Zinc;Zinc-finger		Casein kinase I substrate motif;Cdc2 kinase substrate motif;CDK kinase substrate motif;CDK1,2,4,6 kinase substrate motif;ERK1,2 kinase substrate motif;Growth associated histone HI kinase substrate motif;GSK-3, ERK1, ERK2, CDK5 substrate motif;WW domain binding motif	+	CST;HTP	1	1.27882e-28	158.78	137.47	152.38	-0.43632	130720000	109940000	20781000	758	152.378
NaN	1.29917	NaN	0.484681	0.974219	0.275741	1.42713	NaN	0.491165	1.6692	0.849296	0.604676	1.02697	0.307735	0.414214	1.68538	0.53108	0.656307	0.894141	0.732692	0.656307	-0.0763849	0.476663	S	2	___1		binding;cation binding;ion binding;metal ion binding	cell part;intracellular membrane-bounded organelle;intracellular organelle;intracellular part;membrane-bounded organelle;nucleus;organelle		cell part;intracellular membrane-bounded organelle;intracellular organelle;nucleus;organelle			AAGCACA,MIR-218;AGTCAGC,MIR-345;ATGAAGG,MIR-205;CACCAGC,MIR-138;CAGTGTT,MIR-141,MIR-200A;CCAGGGG,MIR-331;CCCAGAG,MIR-326;CCTGCTG,MIR-214;chr15q22;CTATGCA,MIR-153;CTTTGTA,MIR-524;GACAATC,MIR-219;GAGCTGG,MIR-337;GCAAAAA,MIR-129;GGCAGAC,MIR-346;GGCAGCT,MIR-22;GSE18791_UNSTIM_VS_NEWCATSLE_VIRUS_DC_6H_UP;GSE22886_NAIVE_CD4_TCELL_VS_48H_ACT_TH1_UP;GSE22886_NAIVE_CD4_TCELL_VS_48H_ACT_TH2_UP;GSE25087_TRE…	Completeproteome;Metal-binding;Nucleus;Phosphoprotein;Referenceproteome;Zinc;Zinc-finger		Cdc2 kinase substrate motif;CDK kinase substrate motif;CDK1,2,4,6 kinase substrate motif;ERK1,2 kinase substrate motif;G protein-coupled receptor kinase 1 substrate motif;GSK3 kinase substrate motif;GSK-3, ERK1, ERK2, CDK5 substrate motif;PKA kinase substrate motif;WW domain binding motif	+	HTP	0.999662	0.00453253	85.862	21.208	81.163	0.56449	136350000	103830000	32525000	560	34.7067
1.51922	2.83723	0.765443	1.03529	0.920524	1.44701	2.13165	1.34376	0.836762	2.47835	1.37507	1.34561	2.1517	1.31703	1.64355	2.18651	1.01746	0.945435	0.543879	1.34376	1.37507	0.0313052	0.408644	S	3	___1		binding;cation binding;ion binding;metal ion binding	cell part;intracellular membrane-bounded organelle;intracellular organelle;intracellular part;membrane-bounded organelle;nucleus;organelle		cell part;intracellular membrane-bounded organelle;intracellular organelle;nucleus;organelle			AAGCACA,MIR-218;AGTCAGC,MIR-345;ATGAAGG,MIR-205;CACCAGC,MIR-138;CAGTGTT,MIR-141,MIR-200A;CCAGGGG,MIR-331;CCCAGAG,MIR-326;CCTGCTG,MIR-214;chr15q22;CTATGCA,MIR-153;CTTTGTA,MIR-524;GACAATC,MIR-219;GAGCTGG,MIR-337;GCAAAAA,MIR-129;GGCAGAC,MIR-346;GGCAGCT,MIR-22;GSE18791_UNSTIM_VS_NEWCATSLE_VIRUS_DC_6H_UP;GSE22886_NAIVE_CD4_TCELL_VS_48H_ACT_TH1_UP;GSE22886_NAIVE_CD4_TCELL_VS_48H_ACT_TH2_UP;GSE25087_TRE…	Completeproteome;Metal-binding;Nucleus;Phosphoprotein;Referenceproteome;Zinc;Zinc-finger		14-3-3 domain binding motif;ATM kinase substrate motif;Calmodulin-dependent protein kinase II substrate motif;Casein kinase II substrate motif;DNA dependent Protein kinase substrate motif;G protein-coupled receptor kinase 1 substrate motif;GSK3 kinase substrate motif;MAPKAPK1 kinase substrate motif;PAK2 kinase substrate motif;PKA kinase substrate motif;PKC epsilon kinase substrate motif;PKC kinas…	+	CST;HTP	0.999882	2.16384e-155	265.84	265.84	137.03	0.43911	2025600000	1716000000	309530000	413	42.2974
1.64754	1.86725	NaN	0.407306	2.16034	NaN	2.33763	1.34899	1.32475	1.88689	1.59391	1.24751	1.78875	1.32192	1.21129	1.78641	0.908928	1.54376	0.695016	1.64754	1.54376	-0.103778	0.446626	S	2	___1		binding;cation binding;ion binding;metal ion binding	cell part;intracellular membrane-bounded organelle;intracellular organelle;intracellular part;membrane-bounded organelle;nucleus;organelle		cell part;intracellular membrane-bounded organelle;intracellular organelle;nucleus;organelle			AAGCACA,MIR-218;AGTCAGC,MIR-345;ATGAAGG,MIR-205;CACCAGC,MIR-138;CAGTGTT,MIR-141,MIR-200A;CCAGGGG,MIR-331;CCCAGAG,MIR-326;CCTGCTG,MIR-214;chr15q22;CTATGCA,MIR-153;CTTTGTA,MIR-524;GACAATC,MIR-219;GAGCTGG,MIR-337;GCAAAAA,MIR-129;GGCAGAC,MIR-346;GGCAGCT,MIR-22;GSE18791_UNSTIM_VS_NEWCATSLE_VIRUS_DC_6H_UP;GSE22886_NAIVE_CD4_TCELL_VS_48H_ACT_TH1_UP;GSE22886_NAIVE_CD4_TCELL_VS_48H_ACT_TH2_UP;GSE25087_TRE…	Completeproteome;Metal-binding;Nucleus;Phosphoprotein;Referenceproteome;Zinc;Zinc-finger		Casein kinase I substrate motif;Casein kinase II substrate motif;ERK1,2 kinase substrate motif;G protein-coupled receptor kinase 1 substrate motif;GSK3 kinase substrate motif;GSK-3, ERK1, ERK2, CDK5 substrate motif;WW domain binding motif	+	CST;HTP	0.999992	1.96683e-16	140.68	140.68	126.42	-0.71507	736200000	574460000	161740000	576	52.4687
2.08194	1.91752	NaN	NaN	1.32164	0.604639	1.63032	NaN	0.877612	1.91886	NaN	1.04377	NaN	1.2314	0.9964	1.40294	1.21906	NaN	0.715827	1.47598	1.22523	-0.250748	0.294553	S	2	___1		binding;cation binding;ion binding;metal ion binding	cell part;intracellular membrane-bounded organelle;intracellular organelle;intracellular part;membrane-bounded organelle;nucleus;organelle		cell part;intracellular membrane-bounded organelle;intracellular organelle;nucleus;organelle			AAGCACA,MIR-218;AGTCAGC,MIR-345;ATGAAGG,MIR-205;CACCAGC,MIR-138;CAGTGTT,MIR-141,MIR-200A;CCAGGGG,MIR-331;CCCAGAG,MIR-326;CCTGCTG,MIR-214;chr15q22;CTATGCA,MIR-153;CTTTGTA,MIR-524;GACAATC,MIR-219;GAGCTGG,MIR-337;GCAAAAA,MIR-129;GGCAGAC,MIR-346;GGCAGCT,MIR-22;GSE18791_UNSTIM_VS_NEWCATSLE_VIRUS_DC_6H_UP;GSE22886_NAIVE_CD4_TCELL_VS_48H_ACT_TH1_UP;GSE22886_NAIVE_CD4_TCELL_VS_48H_ACT_TH2_UP;GSE25087_TRE…	Completeproteome;Metal-binding;Nucleus;Phosphoprotein;Referenceproteome;Zinc;Zinc-finger		14-3-3 domain binding motif;Akt kinase substrate motif;Calmodulin-dependent protein kinase II substrate motif;Casein kinase II substrate motif;G protein-coupled receptor kinase 1 substrate motif;MAPKAPK1 kinase substrate motif;p70 Ribosomal S6 kinase substrate motif;PKA kinase substrate motif;PKC kinase substrate motif	+	CST;HTP	0.999998	3.44464e-69	214.66	198.67	214.66	0.75152	239460000	205090000	34374000	467	58.7818
-2.08909	-1.70738	-2.28304	-1.1555	-2.27797	-2.5197	-1.79098	-1.88285	-1.67397	-1.94028	NaN	-1.68734	-2.27073	-2.57502	-2.0988	-1.61081	-1.74846	-3.35176	0.3702	-1.88285	-2.01954	-0.136684	0.410958	S	4	___1	anatomical structure development;cellular component organization;cellular component organization at cellular level;cellular component organization or biogenesis;cellular component organization or biogenesis at cellular level;cellular process;COPII vesicle coating;developmental process;endoplasmic reticulum organization;establishment of localization;establishment of protein localization;organelle …		cell part;cytoplasm;cytoplasmic part;cytosol;endoplasmic reticulum membrane;endoplasmic reticulum part;Golgi apparatus;Golgi apparatus part;Golgi membrane;intracellular membrane-bounded organelle;intracellular organelle;intracellular organelle part;intracellular part;membrane;membrane part;membrane-bounded organelle;organelle;organelle membrane;organelle part	anatomical structure development;cellular component organization;cellular process;developmental process;endoplasmic reticulum organization;establishment of localization;organelle organization;protein transport;transport;vesicle organization	cell part;cytoplasm;cytosol;Golgi apparatus;intracellular membrane-bounded organelle;intracellular organelle;membrane;organelle		Sec16;Sec16_C	BROWNE_HCMV_INFECTION_1HR_DN;BROWNE_HCMV_INFECTION_48HR_DN;BYSTRYKH_HEMATOPOIESIS_STEM_CELL_QTL_TRANS;CAFFAREL_RESPONSE_TO_THC_24HR_5_DN;CHARAFE_BREAST_CANCER_LUMINAL_VS_BASAL_UP;chr9q34;DEBIASI_APOPTOSIS_BY_REOVIRUS_INFECTION_DN;GSE15750_DAY6_VS_DAY10_EFF_CD8_TCELL_DN;GSE15750_DAY6_VS_DAY10_TRAF6KO_EFF_CD8_TCELL_DN;GSE17721_0.5H_VS_12H_POLYIC_BMDM_UP;GSE17721_0.5H_VS_4H_LPS_BMDM_UP;GSE17721_0.5H…	Alternativesplicing;Completeproteome;Endoplasmicreticulum;ER-Golgitransport;Golgiapparatus;Membrane;Phosphoprotein;Polymorphism;Proteintransport;Referenceproteome;Transport	TNF-alpha/NF-kappa B signaling complex (SEC16A, CHUK, IKBKB, NFKB2, REL, IKBKG, MAP3K14, RELA, FBXW7, USP2)	Casein kinase II substrate motif;Pyruvate dehydrogenase kinase substrate motif	+	CST;HTP	0.999853	1.8318e-23	134.26	124.7	87.881	-2.1493	786460000	228120000	558340000	1149	38.322
-1.07846	-0.508277	0.199278	0.185672	-0.768144	0.0465006	-1.53912	-0.365767	-0.951429	-1.1821	0.0412462	0.0754015	-0.409056	NaN	0.0034655	-0.728047	-0.191875	-0.763793	0.606466	-0.508277	-0.300465	0.207812	0.241191	S	3	___1	anatomical structure development;cellular component organization;cellular component organization at cellular level;cellular component organization or biogenesis;cellular component organization or biogenesis at cellular level;cellular process;COPII vesicle coating;developmental process;endoplasmic reticulum organization;establishment of localization;establishment of protein localization;organelle …		cell part;cytoplasm;cytoplasmic part;cytosol;endoplasmic reticulum membrane;endoplasmic reticulum part;Golgi apparatus;Golgi apparatus part;Golgi membrane;intracellular membrane-bounded organelle;intracellular organelle;intracellular organelle part;intracellular part;membrane;membrane part;membrane-bounded organelle;organelle;organelle membrane;organelle part	anatomical structure development;cellular component organization;cellular process;developmental process;endoplasmic reticulum organization;establishment of localization;organelle organization;protein transport;transport;vesicle organization	cell part;cytoplasm;cytosol;Golgi apparatus;intracellular membrane-bounded organelle;intracellular organelle;membrane;organelle		Sec16;Sec16_C	BROWNE_HCMV_INFECTION_1HR_DN;BROWNE_HCMV_INFECTION_48HR_DN;BYSTRYKH_HEMATOPOIESIS_STEM_CELL_QTL_TRANS;CAFFAREL_RESPONSE_TO_THC_24HR_5_DN;CHARAFE_BREAST_CANCER_LUMINAL_VS_BASAL_UP;chr9q34;DEBIASI_APOPTOSIS_BY_REOVIRUS_INFECTION_DN;GSE15750_DAY6_VS_DAY10_EFF_CD8_TCELL_DN;GSE15750_DAY6_VS_DAY10_TRAF6KO_EFF_CD8_TCELL_DN;GSE17721_0.5H_VS_12H_POLYIC_BMDM_UP;GSE17721_0.5H_VS_4H_LPS_BMDM_UP;GSE17721_0.5H…	Alternativesplicing;Completeproteome;Endoplasmicreticulum;ER-Golgitransport;Golgiapparatus;Membrane;Phosphoprotein;Polymorphism;Proteintransport;Referenceproteome;Transport	TNF-alpha/NF-kappa B signaling complex (SEC16A, CHUK, IKBKB, NFKB2, REL, IKBKG, MAP3K14, RELA, FBXW7, USP2)	14-3-3 domain binding motif;Aurora-A kinase substrate motif;Calmodulin-dependent protein kinase II substrate motif;Casein kinase II substrate motif;MAPKAPK2 kinase substrate motif;MDC1 BRCT domain binding motif;PAK2 kinase substrate motif;Phosphorylase kinase substrate motif;PKA kinase substrate motif;PKC epsilon kinase substrate motif;PKC kinase substrate motif;Plk1 PBD domain binding motif	+	HTP	0.933047	6.51081e-66	204.71	198.99	115.42	0.2704	941210000	536590000	404630000	1191	13.351
2.39067	0.15933	NaN	0.115311	NaN	1.34525	0.900479	NaN	NaN	1.07668	1.00189	-0.0629622	1.29919	1.57454	1.58502	1.62307	0.773952	NaN	0.795238	0.900479	1.18793	0.287455	0.180044	S	2	___1	cellular macromolecule metabolic process;cellular metabolic process;cellular nitrogen compound metabolic process;cellular process;macromolecule metabolic process;metabolic process;nitrogen compound metabolic process;nucleic acid metabolic process;nucleobase-containing compound metabolic process;primary metabolic process;RNA metabolic process;RNA processing	binding;nucleotide binding	cell part;intracellular membrane-bounded organelle;intracellular organelle;intracellular organelle part;intracellular part;membrane-bounded organelle;nuclear part;nucleoplasm;nucleus;organelle;organelle part	cellular metabolic process;cellular nitrogen compound metabolic process;cellular process;macromolecule metabolic process;metabolic process;nitrogen compound metabolic process;nucleobase-containing compound metabolic process;primary metabolic process;RNA metabolic process;RNA processing	cell part;intracellular membrane-bounded organelle;intracellular organelle;nucleoplasm;nucleus;organelle	Spliceosome	cwf21;RRM_1;Surp	BERNARD_PPAPDC1B_TARGETS_UP;BROWNE_HCMV_INFECTION_12HR_DN;BRUINS_UVC_RESPONSE_VIA_TP53_GROUP_A;CAIRO_HEPATOBLASTOMA_CLASSES_UP;CHANDRAN_METASTASIS_TOP50_UP;CHANDRAN_METASTASIS_UP;chr3q23;DACOSTA_UV_RESPONSE_VIA_ERCC3_COMMON_DN;DACOSTA_UV_RESPONSE_VIA_ERCC3_DN;DANG_BOUND_BY_MYC;DODD_NASOPHARYNGEAL_CARCINOMA_DN;FARMER_BREAST_CANCER_APOCRINE_VS_LUMINAL;FARMER_BREAST_CANCER_BASAL_VS_LULMINAL;FEVR_CTN…	Acetylation;Alternativesplicing;Coiledcoil;Completeproteome;Nucleus;Phosphoprotein;Referenceproteome;RNA-binding	17S U2 snRNP;Spliceosome	G protein-coupled receptor kinase 1 substrate motif;PKA kinase substrate motif;PKC kinase substrate motif	+	HTP	1	0.00453253	85.862	67.079	85.862	0.38598	41412000	32045000	9366600	244	73.6552
0.0536357	0.0120088	-0.40097	NaN	NaN	NaN	0.126615	NaN	-0.488281	-0.210842	-0.29127	NaN	NaN	0.016142	0.0177885	-0.128269	-0.0808917	-0.0611984	0.81036	0.0120088	-0.0808917	-0.0929005	0.458526	S	3	___1	biological regulation;biosynthetic process;cellular biosynthetic process;cellular component organization;cellular component organization at cellular level;cellular component organization or biogenesis;cellular component organization or biogenesis at cellular level;cellular macromolecule biosynthetic process;cellular macromolecule metabolic process;cellular metabolic process;cellular nitrogen comp…	binding;catalytic activity;histone methyltransferase activity;histone methyltransferase activity (H3-K4 specific);histone-lysine N-methyltransferase activity;lysine N-methyltransferase activity;methyltransferase activity;N-methyltransferase activity;nucleic acid binding;nucleotide binding;protein methyltransferase activity;protein-lysine N-methyltransferase activity;RNA binding;S-adenosylmethioni…	cell part;chromatin remodeling complex;chromosome;histone methyltransferase complex;intracellular membrane-bounded organelle;intracellular non-membrane-bounded organelle;intracellular organelle;intracellular organelle part;intracellular part;macromolecular complex;membrane-bounded organelle;methyltransferase complex;non-membrane-bounded organelle;nuclear body;nuclear part;nuclear speck;nucleoplas…	biological regulation;biosynthetic process;cellular component organization;cellular metabolic process;cellular nitrogen compound metabolic process;cellular process;chromatin organization;chromosome organization;developmental process;macromolecule metabolic process;metabolic process;nitrogen compound metabolic process;nucleobase-containing compound metabolic process;organelle organization;primary …	cell part;chromatin remodeling complex;chromosome;histone methyltransferase complex;intracellular membrane-bounded organelle;intracellular non-membrane-bounded organelle;intracellular organelle;macromolecular complex;nucleoplasm;nucleus;organelle;protein complex	Lysine degradation	N-SET;RRM_1;SET	ACTTTAT,MIR-142-5P;AFFAR_YY1_TARGETS_DN;BYSTRYKH_HEMATOPOIESIS_STEM_CELL_QTL_TRANS;chr16p11;FLECHNER_PBL_KIDNEY_TRANSPLANT_OK_VS_DONOR_UP;FLECHNER_PBL_KIDNEY_TRANSPLANT_REJECTED_VS_OK_DN;GCM_GSPT1;GCM_NF2;GINESTIER_BREAST_CANCER_ZNF217_AMPLIFIED_DN;GSE14308_TH1_VS_NAIVE_CD4_TCELL_DN;GSE14308_TH17_VS_NATURAL_TREG_DN;GSE14308_TH2_VS_NAIVE_CD4_TCELL_DN;GSE1460_DP_THYMOCYTE_VS_THYMIC_STROMAL_CELL_UP;…	3D-structure;Activator;Chromatinregulator;Chromosome;Completeproteome;Methyltransferase;Nucleus;Phosphoprotein;Polymorphism;Referenceproteome;RNA-binding;S-adenosyl-L-methionine;Transcription;Transcriptionregulation;Transferase	HCF-1 complex;MOF complex;Set1A complex	14-3-3 domain binding motif;Calmodulin-dependent protein kinase II substrate motif;ERK1,2 kinase substrate motif;GSK-3, ERK1, ERK2, CDK5 substrate motif;PKA kinase substrate motif;PKC kinase substrate motif;WW domain binding motif	+	CST;HTP	0.999999	1.10167e-23	118.68	113.55	108.28	-0.51048	1202000000	867450000	334530000	470	64.5854
-1.76095	NaN	NaN	-1.20674	NaN	NaN	-1.07939	-2.27492	-2.059	NaN	NaN	-1.57029	-0.739357	-1.26778	-1.01542	NaN	-0.619224	NaN	0.0636073	-1.76095	-1.01542	0.745524	0.0162308	S	3	___1	amine metabolic process;biosynthetic process;carboxylic acid metabolic process;cellular amine metabolic process;cellular amino acid metabolic process;cellular aromatic compound metabolic process;cellular biosynthetic process;cellular ketone metabolic process;cellular metabolic process;cellular nitrogen compound biosynthetic process;cellular nitrogen compound metabolic process;cellular process;'de…	adenyl nucleotide binding;adenyl ribonucleotide binding;ATP binding;binding;carbon-nitrogen ligase activity, with glutamine as amido-N-donor;catalytic activity;cation binding;ion binding;ligase activity;ligase activity, forming carbon-nitrogen bonds;metal ion binding;nucleotide binding;phosphoribosylformylglycinamidine synthase activity;purine nucleotide binding;purine ribonucleoside triphosphate…	cell part;cytoplasm;cytoplasmic part;cytosol;extracellular membrane-bounded organelle;extracellular organelle;extracellular region part;extracellular vesicular exosome;intracellular part;membrane-bounded organelle;membrane-bounded vesicle;organelle;vesicle	amine metabolic process;biosynthetic process;cellular amino acid metabolic process;cellular aromatic compound metabolic process;cellular ketone metabolic process;cellular metabolic process;cellular nitrogen compound metabolic process;cellular process;heterocycle metabolic process;metabolic process;nitrogen compound metabolic process;nucleobase-containing compound metabolic process;nucleobase-cont…	cell part;cytoplasm;cytosol;extracellular organelle;organelle;vesicle	Purine metabolism	AIRS;AIRS_C	BENPORATH_ES_1;BONOME_OVARIAN_CANCER_SURVIVAL_OPTIMAL_DEBULKING;CAIRO_HEPATOBLASTOMA_CLASSES_UP;CHARAFE_BREAST_CANCER_LUMINAL_VS_MESENCHYMAL_DN;chr17p13;DEBIASI_APOPTOSIS_BY_REOVIRUS_INFECTION_DN;DEURIG_T_CELL_PROLYMPHOCYTIC_LEUKEMIA_UP;GCM_DFFA;GNF2_RFC3;GSE10325_LUPUS_BCELL_VS_LUPUS_MYELOID_UP;GSE11924_TFH_VS_TH1_CD4_TCELL_DN;GSE12845_IGD_NEG_BLOOD_VS_DARKZONE_GC_TONSIL_BCELL_DN;GSE12845_IGD_NE…	ATP-binding;Completeproteome;Cytoplasm;Glutamineamidotransferase;Ligase;Magnesium;Metal-binding;Nucleotide-binding;Phosphoprotein;Polymorphism;Purinebiosynthesis;Referenceproteome		Cdc2 kinase substrate motif;CDK kinase substrate motif;CDK1,2,4,6 kinase substrate motif;ERK1,2 kinase substrate motif;Growth associated histone HI kinase substrate motif;GSK-3, ERK1, ERK2, CDK5 substrate motif;WW domain binding motif	+	HTP	0.999998	3.67549e-07	84.375	81.228	77.221	0.30582	37070000	15302000	21768000	569	57.5524
3.50931	4.16406	3.10813	3.17237	NaN	4.04359	4.11627	4.37046	2.49492	2.26313	4.28538	3.55002	3.41399	4.50264	4.01132	3.38778	4.73595	4.61306	0.505153	3.77645	4.01132	0.23487	0.219244	S	2	___1	activation of immune response;antigen receptor-mediated signaling pathway;biological regulation;cell surface receptor linked signaling pathway;cellular macromolecule metabolic process;cellular metabolic process;cellular process;cellular protein metabolic process;cellular response to stimulus;establishment of localization;establishment of localization in cell;establishment of protein localization;…	binding;protein binding;receptor binding	actin cytoskeleton;cell part;cytoplasmic part;cytoskeleton;cytosol;intracellular membrane-bounded organelle;intracellular non-membrane-bounded organelle;intracellular organelle;intracellular part;membrane-bounded organelle;non-membrane-bounded organelle;nucleus;organelle	biological regulation;cellular metabolic process;cellular process;establishment of localization;immune system process;macromolecule metabolic process;macromolecule modification;metabolic process;nuclear transport;nucleocytoplasmic transport;phosphorus metabolic process;primary metabolic process;protein metabolic process;protein modification process;protein phosphorylation;protein targeting;protei…	cell part;cytoskeleton;cytosol;intracellular membrane-bounded organelle;intracellular non-membrane-bounded organelle;intracellular organelle;nucleus;organelle		hSH3;SH3_2	ACEVEDO_LIVER_CANCER_WITH_H3K9ME3_UP;ACEVEDO_METHYLATED_IN_LIVER_CANCER_DN;ACTIN_CYTOSKELETON;AFFAR_YY1_TARGETS_UP;BIOPOLYMER_METABOLIC_PROCESS;BIOPOLYMER_MODIFICATION;BOYLAN_MULTIPLE_MYELOMA_C_D_DN;BOYLAN_MULTIPLE_MYELOMA_PCA1_UP;BROWNE_HCMV_INFECTION_2HR_UP;CELLULAR_LOCALIZATION;CELLULAR_MACROMOLECULE_METABOLIC_PROCESS;CELLULAR_PROTEIN_METABOLIC_PROCESS;CHIARETTI_T_ALL_REFRACTORY_TO_THERAPY;chr…	3D-structure;Acetylation;Alternativesplicing;Coiledcoil;Completeproteome;Cytoplasm;Directproteinsequencing;Nucleus;Phosphoprotein;Polymorphism;Referenceproteome;SH3domain	FYB-CARMA1-BCL-10-MALT1 complex	Casein kinase II substrate motif;PKA kinase substrate motif;PKC kinase substrate motif	+	CST	0.999962	0.00915838	74.464	52.333	74.464	0.21404	93559000	88366000	5193500	558	44.2793
NaN	0.261607	-0.400204	-0.218588	-0.209095	0.164668	0.0823906	-0.509442	-0.102141	0.851673	NaN	-0.0398268	-0.118499	-0.0763156	0.288624	-0.391585	0.403669	-0.557215	0.405536	-0.155618	-0.0580712	0.0975469	0.34165	S	4	___1	biological regulation;biosynthetic process;calcium ion homeostasis;catabolic process;cation homeostasis;cellular biosynthetic process;cellular macromolecule biosynthetic process;cellular macromolecule metabolic process;cellular metabolic process;cellular nitrogen compound metabolic process;cellular process;cellular protein metabolic process;cellular response to chemical stimulus;cellular response…	acid-amino acid ligase activity;binding;catalytic activity;cation binding;chromatin binding;DNA binding;estrogen response element binding;histone acetyl-lysine binding;histone binding;ion binding;kinase activity;ligase activity;ligase activity, forming carbon-nitrogen bonds;metal ion binding;nucleic acid binding;p53 binding;phosphotransferase activity, alcohol group as acceptor;protein binding;pr…	cell part;chromatin;chromosomal part;cytoplasmic part;cytosol;euchromatin;intracellular membrane-bounded organelle;intracellular organelle;intracellular organelle part;intracellular part;membrane-bounded organelle;nuclear chromatin;nuclear chromosome part;nuclear euchromatin;nuclear part;nucleoplasm;nucleus;organelle;organelle part;perichromatin fibrils	biological regulation;biosynthetic process;catabolic process;cellular metabolic process;cellular nitrogen compound metabolic process;cellular process;homeostatic process;macromolecule metabolic process;macromolecule modification;metabolic process;nitrogen compound metabolic process;nucleobase-containing compound metabolic process;phosphorus metabolic process;primary metabolic process;protein cata…	cell part;cytosol;intracellular membrane-bounded organelle;intracellular organelle;nucleoplasm;nucleus;organelle		Bromodomain;PHD;zf-B_box	AAAGACA,MIR-511;BENPORATH_ES_1;BENPORATH_MYC_MAX_TARGETS;BENPORATH_NANOG_TARGETS;BENPORATH_NOS_TARGETS;BENPORATH_OCT4_TARGETS;BENPORATH_SOX2_TARGETS;BIOPOLYMER_METABOLIC_PROCESS;BLALOCK_ALZHEIMERS_DISEASE_UP;chr7q32;COLIN_PILOCYTIC_ASTROCYTOMA_VS_GLIOBLASTOMA_DN;CREIGHTON_ENDOCRINE_THERAPY_RESISTANCE_2;CTTTGT_V$LEF1_Q2;DACOSTA_UV_RESPONSE_VIA_ERCC3_DN;DACOSTA_UV_RESPONSE_VIA_ERCC3_TTD_DN;DODD_NAS…	3D-structure;Alternativesplicing;Bromodomain;Chromosomalrearrangement;Coiledcoil;Completeproteome;Cytoplasm;Directproteinsequencing;DNA-binding;Isopeptidebond;Ligase;Metal-binding;Nucleus;Phosphoprotein;Polymorphism;Referenceproteome;Repeat;Repressor;Transcription;Transcriptionregulation;Tumorsuppressor;Ublconjugation;Ublconjugationpathway;Zinc;Zinc-finger		ERK1,2 kinase substrate motif;Growth associated histone HI kinase substrate motif;GSK-3, ERK1, ERK2, CDK5 substrate motif;WW domain binding motif	+	CST;HTP	0.999791	6.26575e-39	171.29	157.44	168.75	-0.38887	864300000	569060000	295230000	777	36.9277
-0.0345798	-0.671889	NaN	NaN	0.288781	0.729238	NaN	-2.56565	NaN	0.338393	0.177099	-1.07526	-1.14777	-1.17717	-0.251348	0.146922	-0.168665	NaN	0.931129	-0.0345798	-0.210006	-0.175426	0.369911	S	3	___1	biological regulation;biosynthetic process;cellular biosynthetic process;cellular macromolecule biosynthetic process;cellular macromolecule metabolic process;cellular metabolic process;cellular nitrogen compound metabolic process;cellular process;macromolecule biosynthetic process;macromolecule metabolic process;metabolic process;negative regulation of biological process;negative regulation of bi…	binding;DNA binding;nucleic acid binding	cell part;cytoplasmic part;endoplasmic reticulum;intracellular membrane-bounded organelle;intracellular non-membrane-bounded organelle;intracellular organelle;intracellular organelle part;intracellular part;membrane-bounded organelle;non-membrane-bounded organelle;nuclear part;nucleolus;nucleus;organelle;organelle part	biological regulation;biosynthetic process;cellular metabolic process;cellular nitrogen compound metabolic process;cellular process;macromolecule metabolic process;metabolic process;nitrogen compound metabolic process;nucleobase-containing compound metabolic process;primary metabolic process;RNA metabolic process	cell part;endoplasmic reticulum;intracellular membrane-bounded organelle;intracellular non-membrane-bounded organelle;intracellular organelle;nucleolus;nucleus;organelle		G-patch;R3H	CATTTCA,MIR-203;chrxq24;CTTTGTA,MIR-524;GEORGES_TARGETS_OF_MIR192_AND_MIR215;GREGORY_SYNTHETIC_LETHAL_WITH_IMATINIB;GSE10325_BCELL_VS_LUPUS_BCELL_UP;GSE10325_LUPUS_BCELL_VS_LUPUS_MYELOID_UP;GSE13411_IGM_MEMORY_BCELL_VS_PLASMA_CELL_UP;GSE13411_SWITCHED_MEMORY_BCELL_VS_PLASMA_CELL_UP;GSE13484_UNSTIM_VS_YF17D_VACCINE_STIM_PBMC_UP;GSE20366_EX_VIVO_VS_HOMEOSTATIC_CONVERSION_NAIVE_CD4_TCELL_UP;GSE2197_…	Alternativesplicing;Completeproteome;DNA-binding;Nucleus;Referenceproteome;Repressor;Transcription;Transcriptionregulation		14-3-3 domain binding motif;b-Adrenergic Receptor kinase substrate motif;Calmodulin-dependent protein kinase II substrate motif;Calmodulin-dependent protein kinase IV substrate motif;Casein kinase II substrate motif;PKA kinase substrate motif;PKC kinase substrate motif;Pyruvate dehydrogenase kinase substrate motif	+	HTP	0.986887	9.8594e-07	111.31	100.58	111.31	0.47386	61308000	34342000	26966000	618	20.111
NaN	3.38913	3.2198	3.27228	NaN	1.71872	2.13453	0.0880151	-0.668276	NaN	3.07963	2.88143	3.5977	NaN	2.59697	3.55325	0.987315	0.677276	0.444158	2.13453	2.88143	0.746898	0.0160827	S	2	___1		binding;cation binding;ion binding;metal ion binding;transition metal ion binding;zinc ion binding	actin cytoskeleton;adherens junction;anchoring junction;cell junction;cell part;cell-substrate adherens junction;cell-substrate junction;cytoplasm;cytoskeleton;focal adhesion;intracellular non-membrane-bounded organelle;intracellular organelle;intracellular part;membrane;non-membrane-bounded organelle;organelle;plasma membrane		cell part;cytoplasm;cytoskeleton;intracellular non-membrane-bounded organelle;intracellular organelle;membrane;organelle;plasma membrane			ACEVEDO_LIVER_CANCER_WITH_H3K9ME3_DN;BAELDE_DIABETIC_NEPHROPATHY_DN;BASAKI_YBX1_TARGETS_UP;BENPORATH_NANOG_TARGETS;BHAT_ESR1_TARGETS_NOT_VIA_AKT1_UP;BHAT_ESR1_TARGETS_VIA_AKT1_UP;CASORELLI_ACUTE_PROMYELOCYTIC_LEUKEMIA_UP;CATION_BINDING;chrxq28;CONCANNON_APOPTOSIS_BY_EPOXOMICIN_UP;CROMER_TUMORIGENESIS_DN;CUI_TCF21_TARGETS_2_DN;DCA_UP.V1_UP;DODD_NASOPHARYNGEAL_CARCINOMA_UP;DUTERTRE_ESTRADIOL_RESPON…	Alternativesplicing;Celljunction;Completeproteome;Cytoplasm;Cytoskeleton;LIMdomain;Metal-binding;Referenceproteome;Zinc		14-3-3 domain binding motif;b-Adrenergic Receptor kinase substrate motif;Calmodulin-dependent protein kinase II substrate motif;Calmodulin-dependent protein kinase IV substrate motif;Casein kinase II substrate motif;Chk1 kinase substrate motif;G protein-coupled receptor kinase 1 substrate motif;GSK3 kinase substrate motif;PAK2 kinase substrate motif;PKA kinase substrate motif;PKC epsilon kinase s…	+	CST;HTP	0.999985	5.16471e-134	249.06	230.82	243.04	-0.49841	1699700000	1616300000	83391000	466	48.3393
-0.138949	-0.437181	0.000818904	-0.250224	0.148622	-0.429379	0.184306	NaN	-0.63741	0.241353	-0.387252	-0.503309	-0.187855	-0.0251704	-0.127684	0.164979	-0.19174	NaN	0.630473	-0.194586	-0.157769	0.0368168	0.402935	S	3	___1	biological regulation;catabolic process;cellular catabolic process;cellular localization;cellular macromolecule catabolic process;cellular macromolecule localization;cellular macromolecule metabolic process;cellular metabolic process;cellular nitrogen compound metabolic process;cellular process;establishment of localization;establishment of RNA localization;gene expression;intracellular mRNA loca…	binding;enzyme binding;identical protein binding;protein binding;ubiquitin protein ligase binding	cell part;cytoplasmic part;cytosol;exon-exon junction complex;intracellular organelle part;intracellular part;macromolecular complex;nuclear body;nuclear part;nuclear speck;nucleoplasm part;organelle part;perinuclear region of cytoplasm;protein complex;ribonucleoprotein complex	biological regulation;catabolic process;cellular localization;cellular metabolic process;cellular nitrogen compound metabolic process;cellular process;establishment of localization;localization;macromolecule metabolic process;metabolic process;mRNA metabolic process;mRNA processing;nitrogen compound metabolic process;nucleobase-containing compound metabolic process;nucleobase-containing compound …	cell part;cytosol;macromolecular complex;protein complex;ribonucleoprotein complex	mRNA surveillance pathway;RNA transport	Btz	ACTGTGA,MIR-27A,MIR-27B;BLALOCK_ALZHEIMERS_DISEASE_UP;BOYAULT_LIVER_CANCER_SUBCLASS_G3_UP;CAATGCA,MIR-33;CACTGTG,MIR-128A,MIR-128B;chr17q11;CTCAGGG,MIR-125B,MIR-125A;GCCATNTTG_V$YY1_Q6;GRAESSMANN_APOPTOSIS_BY_DOXORUBICIN_DN;GRAESSMANN_RESPONSE_TO_MC_AND_DOXORUBICIN_DN;GSE11864_UNTREATED_VS_CSF1_IN_MAC_DN;GSE11864_UNTREATED_VS_CSF1_PAM3CYS_IN_MAC_DN;GSE11924_TH1_VS_TH2_CD4_TCELL_UP;GSE11924_TH2_VS…	3D-structure;ADP-ribosylation;Coiledcoil;Completeproteome;Cytoplasm;mRNAprocessing;mRNAsplicing;mRNAtransport;Nonsense-mediatedmRNAdecay;Nucleus;Phosphoprotein;Referenceproteome;RNA-binding;Stressresponse;Translationregulation;Transport;Ublconjugation	eIF4AIII-Btz complex;Exon junction complex (EIF4A3-MLN51-MAGOH-Y14);Exon junction complex (EIF4A3-MLN51-MAGOH-Y14), RNA-protein complex;Exon junction complex (EIF4A3-MLN51-UPF3B-MAGOH-Y14);Exon junction complex (F4A3-MLN51-UPF3B-MAGOH-Y14-PYM);Exon junction complex, EIF4A3-MLN51-MAGOH-Y14 (RNA-protein complex)	Casein kinase I substrate motif;PKA kinase substrate motif;PKC kinase substrate motif	+	CST;HTP	0.999943	5.10046e-68	171.63	162.87	156.52	1.0527	572830000	369780000	203050000	148	42.6108
-0.0175796	-0.26972	NaN	-0.244905	0.167193	0.256076	0.115277	0.212976	0.358257	0.129543	NaN	-0.29791	-0.180681	-0.132754	-0.313941	-0.169737	NaN	NaN	0.0454464	0.141235	-0.175209	-0.316444	0.235274	S	3	___1	biological regulation;catabolic process;cellular catabolic process;cellular localization;cellular macromolecule catabolic process;cellular macromolecule localization;cellular macromolecule metabolic process;cellular metabolic process;cellular nitrogen compound metabolic process;cellular process;establishment of localization;establishment of RNA localization;gene expression;intracellular mRNA loca…	binding;enzyme binding;identical protein binding;protein binding;ubiquitin protein ligase binding	cell part;cytoplasmic part;cytosol;exon-exon junction complex;intracellular organelle part;intracellular part;macromolecular complex;nuclear body;nuclear part;nuclear speck;nucleoplasm part;organelle part;perinuclear region of cytoplasm;protein complex;ribonucleoprotein complex	biological regulation;catabolic process;cellular localization;cellular metabolic process;cellular nitrogen compound metabolic process;cellular process;establishment of localization;localization;macromolecule metabolic process;metabolic process;mRNA metabolic process;mRNA processing;nitrogen compound metabolic process;nucleobase-containing compound metabolic process;nucleobase-containing compound …	cell part;cytosol;macromolecular complex;protein complex;ribonucleoprotein complex	mRNA surveillance pathway;RNA transport	Btz	ACTGTGA,MIR-27A,MIR-27B;BLALOCK_ALZHEIMERS_DISEASE_UP;BOYAULT_LIVER_CANCER_SUBCLASS_G3_UP;CAATGCA,MIR-33;CACTGTG,MIR-128A,MIR-128B;chr17q11;CTCAGGG,MIR-125B,MIR-125A;GCCATNTTG_V$YY1_Q6;GRAESSMANN_APOPTOSIS_BY_DOXORUBICIN_DN;GRAESSMANN_RESPONSE_TO_MC_AND_DOXORUBICIN_DN;GSE11864_UNTREATED_VS_CSF1_IN_MAC_DN;GSE11864_UNTREATED_VS_CSF1_PAM3CYS_IN_MAC_DN;GSE11924_TH1_VS_TH2_CD4_TCELL_UP;GSE11924_TH2_VS…	3D-structure;ADP-ribosylation;Coiledcoil;Completeproteome;Cytoplasm;mRNAprocessing;mRNAsplicing;mRNAtransport;Nonsense-mediatedmRNAdecay;Nucleus;Phosphoprotein;Referenceproteome;RNA-binding;Stressresponse;Translationregulation;Transport;Ublconjugation	eIF4AIII-Btz complex;Exon junction complex (EIF4A3-MLN51-MAGOH-Y14);Exon junction complex (EIF4A3-MLN51-MAGOH-Y14), RNA-protein complex;Exon junction complex (EIF4A3-MLN51-UPF3B-MAGOH-Y14);Exon junction complex (F4A3-MLN51-UPF3B-MAGOH-Y14-PYM);Exon junction complex, EIF4A3-MLN51-MAGOH-Y14 (RNA-protein complex)	14-3-3 domain binding motif;AMP-activated protein kinase 2 substrate motif;Calmodulin-dependent protein kinase II substrate motif;ERK1,2 kinase substrate motif;GSK-3, ERK1, ERK2, CDK5 substrate motif;MAPKAPK1 kinase substrate motif;PKA kinase substrate motif;PKC kinase substrate motif;WW domain binding motif	+	CST;HTP	0.99935	6.37309e-16	110.74	104.3	88.385	0.16307	90312000	56117000	34196000	265	31.8709
0.723959	0.592003	1.02151	0.953792	0.522007	-0.103097	-0.417117	NaN	1.46345	1.23727	NaN	2.50672	NaN	0.657476	1.04044	NaN	NaN	2.79572	0.0674395	0.657981	1.23727	0.579287	0.0450691	S	3	___1	biological regulation;chemical homeostasis;cholesterol homeostasis;homeostatic process;lipid homeostasis;positive regulation of catalytic activity;positive regulation of molecular function;regulation of biological process;regulation of biological quality;regulation of catalytic activity;regulation of metabolic process;regulation of molecular function;sterol homeostasis;triglyceride homeostasis	enzyme activator activity;enzyme regulator activity	cell part;cytoplasmic part;endoplasmic reticulum exit site;endoplasmic reticulum part;extracellular region;intracellular organelle part;intracellular part;membrane;organelle part	biological regulation;homeostatic process	cell part;extracellular region;membrane		SH3_2	ACOSTA_PROLIFERATION_INDEPENDENT_MYC_TARGETS_DN;ATM_DN.V1_DN;BAELDE_DIABETIC_NEPHROPATHY_UP;BOCHKIS_FOXA2_TARGETS;BRACHAT_RESPONSE_TO_CAMPTOTHECIN_DN;BRACHAT_RESPONSE_TO_METHOTREXATE_DN;CACGTG_V$MYC_Q2;CAGGTA_V$AREB6_01;CHEMNITZ_RESPONSE_TO_PROSTAGLANDIN_E2_DN;chr14q13;CHUANG_OXIDATIVE_STRESS_RESPONSE_UP;CTAWWWATA_V$RSRFC4_Q2;CTTTAAR_UNKNOWN;DACOSTA_UV_RESPONSE_VIA_ERCC3_DN;DACOSTA_UV_RESPONSE_VI…	Alternativesplicing;Coiledcoil;Completeproteome;Glycoprotein;Phosphoprotein;Polymorphism;Referenceproteome;Secreted;SH3domain;Signal		MAPKAPK2 kinase substrate motif;PKA kinase substrate motif;PKC kinase substrate motif	+	CST;HTP	0.998281	4.33692e-16	114.55	114.55	89.913	-0.22246	107540000	84091000	23446000	555	27.7105
NaN	0.420116	1.56339	1.28334	1.9471	NaN	0.708267	NaN	0.402139	0.470417	1.359	1.14605	NaN	1.66814	1.02636	0.782835	1.17275	1.67342	0.727236	0.995802	1.1594	0.163597	0.279482	S	2	___1	biological regulation;cellular component assembly;cellular component assembly at cellular level;cellular component organization;cellular component organization at cellular level;cellular component organization or biogenesis;cellular component organization or biogenesis at cellular level;cellular localization;cellular membrane fusion;cellular membrane organization;cellular process;establishment of…	binding;channel inhibitor activity;channel regulator activity;chloride channel inhibitor activity;chloride channel regulator activity;ion channel inhibitor activity;protein binding;SNAP receptor activity;SNARE binding;syntaxin binding	azurophil granule;cell part;cytoplasmic membrane-bounded vesicle;cytoplasmic part;cytoplasmic vesicle;early endosome;early endosome membrane;endocytic vesicle;endomembrane system;endosomal part;endosome;endosome membrane;extracellular membrane-bounded organelle;extracellular organelle;extracellular region part;extracellular vesicular exosome;immunological synapse;integral to membrane;intracellula…	biological regulation;cellular component assembly;cellular component organization;cellular localization;cellular membrane organization;cellular process;establishment of localization;localization;membrane docking;membrane fusion;membrane organization;organelle assembly;organelle fusion;organelle localization;organelle organization;protein transport;transport;vesicle organization	cell part;cytoplasmic membrane-bounded vesicle;endomembrane system;endosome;extracellular organelle;intracellular membrane-bounded organelle;intracellular organelle;lysosome;macromolecular complex;membrane;organelle;plasma membrane;protein complex;vacuole;vesicle	Phagosome;SNARE interactions in vesicular transport	SNARE	BAELDE_DIABETIC_NEPHROPATHY_DN;BENPORATH_MYC_MAX_TARGETS;CASORELLI_ACUTE_PROMYELOCYTIC_LEUKEMIA_DN;CELLULAR_LOCALIZATION;CHEN_METABOLIC_SYNDROM_NETWORK;chr6q23;DAVICIONI_MOLECULAR_ARMS_VS_ERMS_UP;DODD_NASOPHARYNGEAL_CARCINOMA_UP;ENK_UV_RESPONSE_KERATINOCYTE_DN;ESC_V6.5_UP_LATE.V1_UP;ESTABLISHMENT_OF_CELLULAR_LOCALIZATION;ESTABLISHMENT_OF_LOCALIZATION;FEVR_CTNNB1_TARGETS_UP;GARY_CD5_TARGETS_DN;GEN…	Acetylation;Alternativesplicing;Coiledcoil;Completeproteome;Directproteinsequencing;Endosome;Membrane;Phosphoprotein;Referenceproteome;Transmembrane;Transmembranehelix	Class C Vps complex (VPS11, VPS18, STX7)	Casein kinase II substrate motif;G protein-coupled receptor kinase 1 substrate motif;MAPKAPK2 kinase substrate motif;PKA kinase substrate motif;PKC kinase substrate motif	+	CST;HTP	0.999608	3.64975e-42	177.44	167.53	163.04	0.60061	585460000	493240000	92225000	129	34.0913
-0.168038	NaN	-1.40234	-1.38291	0.168512	-0.397297	-0.463799	NaN	-0.00243268	-0.580369	-0.881026	NaN	-0.438537	-1.10432	-0.884354	-0.316645	-0.92629	0.0473952	0.687076	-0.397297	-0.730697	-0.333401	0.221118	S	2	___1	biological regulation;cellular component assembly;cellular component assembly at cellular level;cellular component organization;cellular component organization at cellular level;cellular component organization or biogenesis;cellular component organization or biogenesis at cellular level;cellular process;chromatin assembly;chromatin assembly or disassembly;chromatin modification;chromatin organiza…	binding;chromatin binding;DNA binding;nucleic acid binding;regulatory region DNA binding;regulatory region nucleic acid binding;sequence-specific DNA binding;transcription regulatory region DNA binding;transcription regulatory region sequence-specific DNA binding	cell part;chromatin;chromatin remodeling complex;chromatin silencing complex;chromosomal part;cytoplasm;cytoplasmic part;intracellular membrane-bounded organelle;intracellular organelle;intracellular organelle part;intracellular part;macromolecular complex;membrane;membrane-bounded organelle;mitochondrion;nuclear membrane;nuclear part;nucleoplasm;nucleus;organelle;organelle membrane;organelle par…	biological regulation;cellular component assembly;cellular component organization;cellular process;chromatin modification;chromatin organization;chromosome organization;gene silencing;organelle organization;regulation of gene expression, epigenetic	cell part;chromatin remodeling complex;cytoplasm;intracellular membrane-bounded organelle;intracellular organelle;macromolecular complex;membrane;mitochondrion;nucleoplasm;nucleus;organelle;protein complex		BAH	BAKKER_FOXO3_TARGETS_DN;CHARAFE_BREAST_CANCER_LUMINAL_VS_BASAL_UP;chr7p22;DCA_UP.V1_DN;DELACROIX_RAR_TARGETS_DN;DELACROIX_RARG_BOUND_MEF;DODD_NASOPHARYNGEAL_CARCINOMA_UP;GSE14308_NAIVE_CD4_TCELL_VS_NATURAL_TREG_UP;GSE14308_TH17_VS_NATURAL_TREG_DN;GSE17721_0.5H_VS_8H_GARDIQUIMOD_BMDM_DN;GSE17721_CTRL_VS_LPS_24H_BMDM_DN;GSE17721_LPS_VS_GARDIQUIMOD_24H_BMDM_UP;GSE17721_PAM3CSK4_VS_GADIQUIMOD_0.5H_BM…	Alternativesplicing;Coiledcoil;Completeproteome;Isopeptidebond;Phosphoprotein;Polymorphism;Referenceproteome;Ublconjugation		Cdc2 kinase substrate motif;CDK kinase substrate motif;CDK1,2,4,6 kinase substrate motif;CDK4 kinase substrate motif;ERK1,2 kinase substrate motif;Growth associated histone HI kinase substrate motif;GSK-3, ERK1, ERK2, CDK5 substrate motif;PKA kinase substrate motif;PKC kinase substrate motif;WW domain binding motif	+	HTP	1	0.004674	83.948	31.232	43.308	1.0367	58111000	30593000	27518000	2033	43.3077
0.552012	-2.56912	NaN	NaN	0.395409	0.954254	NaN	NaN	1.21525	-0.669277	NaN	NaN	-1.1749	0.384381	0.298871	0.274037	NaN	1.53128	0.997888	0.552012	0.286454	-0.265558	0.280608	S	3	___1	biological regulation;cellular component assembly;cellular component assembly at cellular level;cellular component organization;cellular component organization at cellular level;cellular component organization or biogenesis;cellular component organization or biogenesis at cellular level;cellular process;chromatin assembly;chromatin assembly or disassembly;chromatin modification;chromatin organiza…	binding;chromatin binding;DNA binding;nucleic acid binding;regulatory region DNA binding;regulatory region nucleic acid binding;sequence-specific DNA binding;transcription regulatory region DNA binding;transcription regulatory region sequence-specific DNA binding	cell part;chromatin;chromatin remodeling complex;chromatin silencing complex;chromosomal part;cytoplasm;cytoplasmic part;intracellular membrane-bounded organelle;intracellular organelle;intracellular organelle part;intracellular part;macromolecular complex;membrane;membrane-bounded organelle;mitochondrion;nuclear membrane;nuclear part;nucleoplasm;nucleus;organelle;organelle membrane;organelle par…	biological regulation;cellular component assembly;cellular component organization;cellular process;chromatin modification;chromatin organization;chromosome organization;gene silencing;organelle organization;regulation of gene expression, epigenetic	cell part;chromatin remodeling complex;cytoplasm;intracellular membrane-bounded organelle;intracellular organelle;macromolecular complex;membrane;mitochondrion;nucleoplasm;nucleus;organelle;protein complex		BAH	BAKKER_FOXO3_TARGETS_DN;CHARAFE_BREAST_CANCER_LUMINAL_VS_BASAL_UP;chr7p22;DCA_UP.V1_DN;DELACROIX_RAR_TARGETS_DN;DELACROIX_RARG_BOUND_MEF;DODD_NASOPHARYNGEAL_CARCINOMA_UP;GSE14308_NAIVE_CD4_TCELL_VS_NATURAL_TREG_UP;GSE14308_TH17_VS_NATURAL_TREG_DN;GSE17721_0.5H_VS_8H_GARDIQUIMOD_BMDM_DN;GSE17721_CTRL_VS_LPS_24H_BMDM_DN;GSE17721_LPS_VS_GARDIQUIMOD_24H_BMDM_UP;GSE17721_PAM3CSK4_VS_GADIQUIMOD_0.5H_BM…	Alternativesplicing;Coiledcoil;Completeproteome;Isopeptidebond;Phosphoprotein;Polymorphism;Referenceproteome;Ublconjugation		14-3-3 domain binding motif;Akt kinase substrate motif;AMP-activated protein kinase 2 substrate motif;Calmodulin-dependent protein kinase II substrate motif;Casein kinase II substrate motif;DNA dependent Protein kinase substrate motif;MAPKAPK1 kinase substrate motif;p70 Ribosomal S6 kinase substrate motif;Phosphorylase kinase substrate motif;PKA kinase substrate motif;PKC kinase substrate motif	+	CST;HTP	1	7.50185e-05	78.814	74.114	76.728	0.044567	62431000	37891000	24540000	2771	76.7282
-0.928612	0.122198	1.09974	0.350018	NaN	NaN	-0.249289	NaN	NaN	-0.321029	NaN	0.539056	-0.343829	0.0274776	0.730268	0.281772	0.277877	NaN	0.81277	0.122198	0.277877	0.155679	0.286638	S	2	___1	actin cytoskeleton organization;actin filament-based process;activation of immune response;activation of innate immune response;activation of protein kinase activity;activation of protein kinase B activity;anatomical structure development;antigen receptor-mediated signaling pathway;biological regulation;biosynthetic process;blood coagulation;calcium-mediated signaling;cell activation;cell communi…	3-phosphoinositide-dependent protein kinase activity;adenyl nucleotide binding;adenyl ribonucleotide binding;ATP binding;binding;catalytic activity;enzyme activator activity;enzyme binding;enzyme regulator activity;kinase activity;lipase activator activity;nucleotide binding;phospholipase activator activity;phospholipase binding;phosphotransferase activity, alcohol group as acceptor;protein bindi…	adherens junction;anchoring junction;cell junction;cell part;cell projection;cell-substrate adherens junction;cell-substrate junction;cytoplasm;cytoplasmic membrane-bounded vesicle;cytoplasmic part;cytoplasmic vesicle;cytosol;focal adhesion;intracellular membrane-bounded organelle;intracellular organelle;intracellular organelle part;intracellular part;membrane;membrane-bounded organelle;membrane-…	anatomical structure development;biological regulation;biosynthetic process;cell activation;cell communication;cell development;cell junction organization;cell motility;cell-cell signaling;cellular component assembly;cellular component movement;cellular component organization;cellular metabolic process;cellular nitrogen compound metabolic process;cellular process;coagulation;cytoskeleton organiza…	cell part;cell projection;cytoplasm;cytoplasmic membrane-bounded vesicle;cytosol;intracellular membrane-bounded organelle;intracellular organelle;membrane;nucleoplasm;organelle;plasma membrane;vesicle	Aldosterone-regulated sodium reabsorption;Endometrial cancer;Focal adhesion;Insulin signaling pathway;mTOR signaling pathway;Non-small cell lung cancer;PPAR signaling pathway;Prostate cancer	Pkinase	AACTGAC,MIR-223;ACAACTT,MIR-382;ACTGTGA,MIR-27A,MIR-27B;ACTIN_CYTOSKELETON_ORGANIZATION_AND_BIOGENESIS;ACTIN_FILAMENT_BASED_PROCESS;AGUIRRE_PANCREATIC_CANCER_COPY_NUMBER_DN;ATGTACA,MIR-493;BIOCARTA_AKT_PATHWAY;BIOCARTA_EIF4_PATHWAY;BIOCARTA_GSK3_PATHWAY;BIOCARTA_IGF1MTOR_PATHWAY;BIOCARTA_MTOR_PATHWAY;BIOCARTA_PTDINS_PATHWAY;BIOCARTA_PTEN_PATHWAY;BIOPOLYMER_METABOLIC_PROCESS;BIOPOLYMER_MODIFICATIO…	3D-structure;Acetylation;Activator;Alternativesplicing;ATP-binding;Celljunction;Cellmembrane;Completeproteome;Cytoplasm;Directproteinsequencing;Kinase;Membrane;Nucleotide-binding;Nucleus;Phosphoprotein;Referenceproteome;Serine/threonine-proteinkinase;Transcription;Transcriptionregulation;Transferase;Ublconjugation		14-3-3 domain binding motif;Calmodulin-dependent protein kinase II substrate motif;G protein-coupled receptor kinase 1 substrate motif;PKA kinase substrate motif;PKC kinase substrate motif	+	CST;HTP;LTP	0.999904	1.13837e-15	102.97	95.324	102.97	-1.2578	95638000	61146000	34492000	191	40.1914
NaN	0.691144	1.62718	1.51583	NaN	-1.67591	NaN	NaN	-1.0017	-1.7676	1.68005	NaN	-1.20671	0.715972	1.81363	0.0208276	-0.733604	0.636926	0.918186	0.691144	0.328877	-0.362267	0.198176	S	2	___1	biological regulation;cellular process;cellular response to stimulus;defense response;immune response;immune system process;inflammatory response;innate immune response;intracellular receptor mediated signaling pathway;negative regulation of biological process;negative regulation of chemokine production;negative regulation of cytokine production;negative regulation of defense response;negative re…	actin binding;binding;cation binding;cytoskeletal protein binding;ion binding;metal ion binding;protein binding;transition metal ion binding;zinc ion binding	cell part;cell projection;cytoplasmic part;cytoskeletal part;cytosol;intracellular membrane-bounded organelle;intracellular organelle;intracellular organelle part;intracellular part;lamellipodium;macromolecular complex;membrane-bounded organelle;microtubule;microtubule associated complex;nucleus;organelle;organelle part;protein complex;ruffle	biological regulation;cellular process;immune system process;response to stimulus;response to stress;signal transduction	cell part;cell projection;cytosol;intracellular membrane-bounded organelle;intracellular organelle;macromolecular complex;nucleus;organelle;protein complex	NOD-like receptor signaling pathway	PRY;PYRIN;SPRY;zf-B_box	ACTIN_BINDING;ALTEMEIER_RESPONSE_TO_LPS_WITH_MECHANICAL_VENTILATION;CHEN_METABOLIC_SYNDROM_NETWORK;chr16p13;CHYLA_CBFA2T3_TARGETS_UP;CYTOSKELETAL_PART;CYTOSKELETAL_PROTEIN_BINDING;CYTOSKELETON;DEFENSE_RESPONSE;GSE10094_LCMV_VS_LISTERIA_IND_EFF_CD4_TCELL_DN;GSE14026_TH1_VS_TH17_UP;GSE17721_0.5H_VS_12H_CPG_BMDM_DN;GSE17721_12H_VS_24H_PAM3CSK4_BMDM_UP;GSE17721_CTRL_VS_GARDIQUIMOD_1H_BMDM_DN;GSE17721…	3D-structure;Actin-binding;Alternativesplicing;Amyloidosis;Cellprojection;Coiledcoil;Completeproteome;Cytoplasm;Cytoskeleton;Diseasemutation;Immunity;Inflammatoryresponse;Innateimmunity;Metal-binding;Microtubule;Nucleus;Polymorphism;Referenceproteome;Zinc;Zinc-finger		14-3-3 domain binding motif;Akt kinase substrate motif;Calmodulin-dependent protein kinase II substrate motif;ERK1,2 kinase substrate motif;G protein-coupled receptor kinase 1 substrate motif;Growth associated histone HI kinase substrate motif;GSK-3, ERK1, ERK2, CDK5 substrate motif;MAPKAPK1 kinase substrate motif;PKA kinase substrate motif;PKC kinase substrate motif;WW domain binding motif			0.998598	0.000298317	84.365	56.501	71.558	-0.22175	112700000	83375000	29322000	179	28.5274
-0.671589	-0.320938	NaN	NaN	-0.274406	-2.10059	-0.881921	NaN	-0.119773	-1.12866	NaN	NaN	-1.62293	-2.16971	NaN	-1.38085	-1.70888	-0.568115	0.0908653	-0.496264	-1.50189	-1.00563	0.00433053	S	2	___1	biological regulation;biosynthetic process;carbon catabolite regulation of transcription;cell communication;cellular biosynthetic process;cellular component organization;cellular component organization at cellular level;cellular component organization or biogenesis;cellular component organization or biogenesis at cellular level;cellular macromolecule biosynthetic process;cellular macromolecule me…	binding;catalytic activity;histone binding;methylated histone residue binding;methyltransferase activity;protein binding;S-adenosylmethionine-dependent methyltransferase activity;transferase activity;transferase activity, transferring one-carbon groups	cell part;chromatin;chromatin remodeling complex;chromatin silencing complex;chromosomal part;cytoplasm;heterochromatin;intracellular membrane-bounded organelle;intracellular non-membrane-bounded organelle;intracellular organelle;intracellular organelle part;intracellular part;macromolecular complex;membrane;membrane-bounded organelle;non-membrane-bounded organelle;nuclear part;nucleolus;nucleopl…	biological regulation;biosynthetic process;cell communication;cellular component organization;cellular metabolic process;cellular nitrogen compound metabolic process;cellular process;chromatin modification;chromatin organization;chromosome organization;gene silencing;macromolecule metabolic process;metabolic process;nitrogen compound metabolic process;nucleobase-containing compound metabolic proc…	cell part;chromatin remodeling complex;cytoplasm;intracellular membrane-bounded organelle;intracellular non-membrane-bounded organelle;intracellular organelle;macromolecular complex;membrane;nucleolus;nucleoplasm;nucleus;organelle;plasma membrane;protein complex		Methyltransf_8	BOUDOUKHA_BOUND_BY_IGF2BP2;CACGTG_V$MYC_Q2;CAIRO_LIVER_DEVELOPMENT_UP;chr11p15;ESC_J1_UP_EARLY.V1_DN;ESC_J1_UP_LATE.V1_DN;GGGAGGRR_V$MAZ_Q6;GRAESSMANN_APOPTOSIS_BY_DOXORUBICIN_DN;GRAESSMANN_RESPONSE_TO_MC_AND_DOXORUBICIN_DN;GSE12845_IGD_NEG_BLOOD_VS_PRE_GC_TONSIL_BCELL_UP;GSE12845_IGD_POS_BLOOD_VS_PRE_GC_TONSIL_BCELL_UP;GSE12845_PRE_GC_VS_DARKZONE_GC_TONSIL_BCELL_DN;GSE17721_12H_VS_24H_PAM3CSK4_B…	3D-structure;Chromatinregulator;Completeproteome;Methyltransferase;Nucleus;Phosphoprotein;Polymorphism;Referenceproteome;Repressor;rRNAprocessing;S-adenosyl-L-methionine;Transcription;Transcriptionregulation;Transferase		ERK1,2 kinase substrate motif;GSK-3, ERK1, ERK2, CDK5 substrate motif;PKA kinase substrate motif;WW domain binding motif	+	CST;HTP	0.999971	0.000972017	72.321	59.284	72.321	-0.53771	21441000	9513000	11928000	223	45.4318
-1.22953	0.735724	NaN	0.716477	2.8147	0.741379	-0.255354	NaN	NaN	-0.32452	NaN	-0.0993781	-0.986779	-0.198506	NaN	NaN	1.66437	NaN	0.434645	0.726101	-0.198506	-0.924606	0.00816695	S	2	___1	actin cytoskeleton organization;actin cytoskeleton reorganization;actin filament-based process;biological regulation;cell surface receptor linked signaling pathway;cellular component organization;cellular component organization at cellular level;cellular component organization or biogenesis;cellular component organization or biogenesis at cellular level;cellular process;cellular response to stimu…	enzyme activator activity;enzyme regulator activity;GTPase activator activity;GTPase regulator activity;nucleoside-triphosphatase regulator activity	cell junction;cell part;cell projection;cell projection part;cytoplasm;cytoskeletal part;cytoskeleton;dendritic spine;intracellular non-membrane-bounded organelle;intracellular organelle;intracellular organelle part;intracellular part;membrane;neuron projection;neuron spine;non-membrane-bounded organelle;organelle;organelle part;postsynaptic density;postsynaptic membrane;synapse part;synaptic mem…	biological regulation;cellular component organization;cellular process;cytoskeleton organization;organelle organization;response to stimulus;signal transduction	cell part;cell projection;cytoplasm;cytoskeleton;intracellular non-membrane-bounded organelle;intracellular organelle;membrane;neuron projection;organelle		DUF3401;Rap_GAP	BROWNE_HCMV_INFECTION_12HR_DN;BROWNE_HCMV_INFECTION_20HR_DN;CASORELLI_ACUTE_PROMYELOCYTIC_LEUKEMIA_UP;CHEMNITZ_RESPONSE_TO_PROSTAGLANDIN_E2_DN;chr14q24;CTAWWWATA_V$RSRFC4_Q2;CUI_TCF21_TARGETS_2_UP;DACOSTA_UV_RESPONSE_VIA_ERCC3_DN;DOANE_RESPONSE_TO_ANDROGEN_DN;DODD_NASOPHARYNGEAL_CARCINOMA_UP;GENTILE_UV_LOW_DOSE_DN;GGATTA_V$PITX2_Q2;GSE10325_CD4_TCELL_VS_BCELL_DN;GSE11864_CSF1_VS_CSF1_IFNG_PAM3CYS…	Alternativesplicing;Celljunction;Cellmembrane;Coiledcoil;Completeproteome;Cytoplasm;Cytoskeleton;GTPaseactivation;Membrane;Phosphoprotein;Polymorphism;Postsynapticcellmembrane;Referenceproteome;Synapse;Synaptosome;Ublconjugation		14-3-3 domain binding motif;Calmodulin-dependent protein kinase II substrate motif;Calmodulin-dependent protein kinase IV substrate motif;Chk1 kinase substrate motif;PKA kinase substrate motif;PKC kinase substrate motif	+	CST;HTP	0.930514	0.000275031	66.004	54.746	66.004	-0.68569	39669000	27944000	11724000	1116	14.2785
0.138796	0.219189	0.217323	-0.0293982	0.0331267	0.519653	0.5417	0.0027384	0.934196	0.173537	0.248279	0.169729	0.293677	0.111149	0.21276	0.229731	0.290553	0.393952	0.657201	0.217323	0.229731	0.0124088	0.428355	S	4	___1	biological regulation;cell cycle arrest;cell cycle process;cellular component assembly;cellular component assembly at cellular level;cellular component organization;cellular component organization at cellular level;cellular component organization or biogenesis;cellular component organization or biogenesis at cellular level;cellular macromolecular complex assembly;cellular macromolecular complex s…		Cajal body;catalytic step 2 spliceosome;cell part;cytoplasm;cytoplasmic part;cytosol;Golgi apparatus;intracellular membrane-bounded organelle;intracellular organelle;intracellular organelle part;intracellular part;macromolecular complex;membrane-bounded organelle;nuclear body;nuclear part;nucleoplasm;nucleoplasm part;organelle;organelle part;ribonucleoprotein complex;small nuclear ribonucleoprote…	biological regulation;cellular component assembly;cellular component organization;cellular macromolecular complex assembly;cellular metabolic process;cellular nitrogen compound metabolic process;cellular process;macromolecular complex assembly;macromolecule metabolic process;metabolic process;mRNA metabolic process;mRNA processing;nitrogen compound metabolic process;nucleobase-containing compound…	cell part;cytoplasm;cytosol;Golgi apparatus;intracellular membrane-bounded organelle;intracellular organelle;macromolecular complex;nucleoplasm;organelle;ribonucleoprotein complex;small nuclear ribonucleoprotein complex;spliceosomal complex	Spliceosome	SART-1	ANATOMICAL_STRUCTURE_DEVELOPMENT;BLALOCK_ALZHEIMERS_DISEASE_UP;CATRRAGC_UNKNOWN;CELL_ACTIVATION;CHEOK_RESPONSE_TO_MERCAPTOPURINE_AND_HD_MTX_DN;chr11q13;CYTOPLASM;CYTOPLASMIC_PART;CYTOSOL;GGGCGGR_V$SP1_Q6;GSE12845_NAIVE_VS_DARKZONE_GC_TONSIL_BCELL_DN;GSE13411_NAIVE_BCELL_VS_PLASMA_CELL_UP;GSE14000_TRANSLATED_RNA_VS_MRNA_4H_LPS_DC_UP;GSE14308_TH1_VS_INDUCED_TREG_UP;GSE1448_CTRL_VS_ANTI_VALPHA2_DP_T…	3D-structure;Allergen;Alternativesplicing;Coiledcoil;Completeproteome;mRNAprocessing;mRNAsplicing;Nucleus;Phosphoprotein;Polymorphism;Referenceproteome;Spliceosome;Ublconjugation	C complex spliceosome;Spliceosome	14-3-3 domain binding motif;Calmodulin-dependent protein kinase II substrate motif;Casein kinase II substrate motif;G protein-coupled receptor kinase 1 substrate motif;MAPKAPK1 kinase substrate motif;PAK2 kinase substrate motif;Pim1 kinase substrate sequence;PKA kinase substrate motif;PKC epsilon kinase substrate motif;PKC kinase substrate motif;ZIP kinase substrate motif	+	CST;HTP	1	6.0371e-96	210.36	210.36	136.44	-0.067004	4814500000	3260600000	1553900000	448	135.382
NaN	-0.69324	0.575869	0.141962	-0.811254	-1.13259	-0.244839	0.301325	-1.74882	-0.709633	0.287558	-0.411469	-0.622836	0.112818	-0.0771869	-0.194	-0.350168	-0.986331	0.698547	-0.46904	-0.350168	0.118872	0.320994	S	2	___1	activation of immune response;activation of innate immune response;activation of MAPK activity;activation of MAPKK activity;activation of NF-kappaB-inducing kinase activity;activation of protein kinase activity;anatomical structure formation involved in morphogenesis;angiogenesis;antigen receptor-mediated signaling pathway;apoptosis;biological regulation;biosynthetic process;cell death;cell surfa…	adenyl nucleotide binding;adenyl ribonucleotide binding;ATP binding;binding;catalytic activity;cation binding;ion binding;kinase activity;magnesium ion binding;MAP kinase kinase activity;MAP kinase kinase kinase activity;metal ion binding;molecular transducer activity;nucleotide binding;phosphotransferase activity, alcohol group as acceptor;protein binding;protein kinase activity;protein serine/t…	Ada2/Gcn5/Ada3 transcription activator complex;cell part;cytoplasm;cytoplasmic part;cytosol;endosomal part;endosome membrane;histone acetyltransferase complex;intracellular membrane-bounded organelle;intracellular organelle;intracellular organelle part;intracellular part;macromolecular complex;membrane;membrane-bounded organelle;nuclear part;nucleoplasm;nucleoplasm part;nucleus;organelle;organell…	anatomical structure formation involved in morphogenesis;biological regulation;biosynthetic process;cell death;cellular component organization;cellular metabolic process;cellular nitrogen compound metabolic process;cellular process;chromatin modification;chromatin organization;chromosome organization;death;developmental process;histone modification;immune system process;macromolecule metabolic pr…	cell part;cytoplasm;cytosol;intracellular membrane-bounded organelle;intracellular organelle;macromolecular complex;membrane;nucleoplasm;nucleus;organelle;plasma membrane;protein complex	Adherens junction;Leishmaniasis;MAPK signaling pathway;Measles;NOD-like receptor signaling pathway;Osteoclast differentiation;RIG-I-like receptor signaling pathway;T cell receptor signaling pathway;Toll-like receptor signaling pathway;Toxoplasmosis;Wnt signaling pathway	Pkinase_Tyr	ACAGGGT,MIR-10A,MIR-10B;ACTIVATION_OF_PROTEIN_KINASE_ACTIVITY;ADAPTIVE_IMMUNE_RESPONSE;ADAPTIVE_IMMUNE_RESPONSE_GO_0002460;AGGCACT,MIR-515-3P;BIOCARTA_ALK_PATHWAY;BIOCARTA_FAS_PATHWAY;BIOCARTA_IL1R_PATHWAY;BIOCARTA_MAPK_PATHWAY;BIOCARTA_NFKB_PATHWAY;BIOCARTA_NTHI_PATHWAY;BIOCARTA_P38MAPK_PATHWAY;BIOCARTA_PAR1_PATHWAY;BIOCARTA_TGFB_PATHWAY;BIOCARTA_TNFR1_PATHWAY;BIOCARTA_TOLL_PATHWAY;BIOCARTA_WNT_…	3D-structure;Alternativesplicing;Apoptosis;ATP-binding;Cellmembrane;Completeproteome;Cytoplasm;Isopeptidebond;Kinase;Magnesium;Membrane;Metal-binding;Nucleotide-binding;Phosphoprotein;Referenceproteome;Serine/threonine-proteinkinase;Stressresponse;Transcription;Transcriptionregulation;Transferase;Ublconjugation	STAT3-NLK-MAP3K7 complex;TNF-alpha/NF-kappa B signaling complex 7;TRAF6-TAK1 complex;TRIKA2 protein kinase complex (TAK1, TAB1, TAB2)	G protein-coupled receptor kinase 1 substrate motif;GSK3 kinase substrate motif;PAK2 kinase substrate motif;PKA kinase substrate motif;PKC kinase substrate motif	+	CST;HTP	1	1.72273e-14	140.31	135.16	110.51	-0.55649	161590000	101850000	59733000	389	72.1105
-1.08714	-0.535568	0.397897	0.209806	-0.807902	-1.85855	-0.645971	-0.0760041	-1.58516	-0.0846365	0.0652751	-0.506033	-0.823222	-0.347316	-0.178439	-0.398984	-0.489004	-1.35919	0.492055	-0.645971	-0.398984	0.246987	0.209801	S	2	___1	activation of immune response;activation of innate immune response;activation of MAPK activity;activation of MAPKK activity;activation of NF-kappaB-inducing kinase activity;activation of protein kinase activity;anatomical structure formation involved in morphogenesis;angiogenesis;antigen receptor-mediated signaling pathway;apoptosis;biological regulation;biosynthetic process;cell death;cell surfa…	adenyl nucleotide binding;adenyl ribonucleotide binding;ATP binding;binding;catalytic activity;cation binding;ion binding;kinase activity;magnesium ion binding;MAP kinase kinase activity;MAP kinase kinase kinase activity;metal ion binding;molecular transducer activity;nucleotide binding;phosphotransferase activity, alcohol group as acceptor;protein binding;protein kinase activity;protein serine/t…	Ada2/Gcn5/Ada3 transcription activator complex;cell part;cytoplasm;cytoplasmic part;cytosol;endosomal part;endosome membrane;histone acetyltransferase complex;intracellular membrane-bounded organelle;intracellular organelle;intracellular organelle part;intracellular part;macromolecular complex;membrane;membrane-bounded organelle;nuclear part;nucleoplasm;nucleoplasm part;nucleus;organelle;organell…	anatomical structure formation involved in morphogenesis;biological regulation;biosynthetic process;cell death;cellular component organization;cellular metabolic process;cellular nitrogen compound metabolic process;cellular process;chromatin modification;chromatin organization;chromosome organization;death;developmental process;histone modification;immune system process;macromolecule metabolic pr…	cell part;cytoplasm;cytosol;intracellular membrane-bounded organelle;intracellular organelle;macromolecular complex;membrane;nucleoplasm;nucleus;organelle;plasma membrane;protein complex	Adherens junction;Leishmaniasis;MAPK signaling pathway;Measles;NOD-like receptor signaling pathway;Osteoclast differentiation;RIG-I-like receptor signaling pathway;T cell receptor signaling pathway;Toll-like receptor signaling pathway;Toxoplasmosis;Wnt signaling pathway	Pkinase_Tyr	ACAGGGT,MIR-10A,MIR-10B;ACTIVATION_OF_PROTEIN_KINASE_ACTIVITY;ADAPTIVE_IMMUNE_RESPONSE;ADAPTIVE_IMMUNE_RESPONSE_GO_0002460;AGGCACT,MIR-515-3P;BIOCARTA_ALK_PATHWAY;BIOCARTA_FAS_PATHWAY;BIOCARTA_IL1R_PATHWAY;BIOCARTA_MAPK_PATHWAY;BIOCARTA_NFKB_PATHWAY;BIOCARTA_NTHI_PATHWAY;BIOCARTA_P38MAPK_PATHWAY;BIOCARTA_PAR1_PATHWAY;BIOCARTA_TGFB_PATHWAY;BIOCARTA_TNFR1_PATHWAY;BIOCARTA_TOLL_PATHWAY;BIOCARTA_WNT_…	3D-structure;Alternativesplicing;Apoptosis;ATP-binding;Cellmembrane;Completeproteome;Cytoplasm;Isopeptidebond;Kinase;Magnesium;Membrane;Metal-binding;Nucleotide-binding;Phosphoprotein;Referenceproteome;Serine/threonine-proteinkinase;Stressresponse;Transcription;Transcriptionregulation;Transferase;Ublconjugation	STAT3-NLK-MAP3K7 complex;TNF-alpha/NF-kappa B signaling complex 7;TRAF6-TAK1 complex;TRIKA2 protein kinase complex (TAK1, TAB1, TAB2)	14-3-3 domain binding motif;Aurora-A kinase substrate motif;Calmodulin-dependent protein kinase II substrate motif;Casein kinase II substrate motif;PAK2 kinase substrate motif;Phosphorylase kinase substrate motif;PKA kinase substrate motif;PKC epsilon kinase substrate motif;PKC kinase substrate motif;Pyruvate dehydrogenase kinase substrate motif	+	CST;HTP;LTP	1	1.09892e-70	187.13	174.75	161.5	0.41817	945110000	578780000	366320000	412	90.2047
NaN	-0.230289	-0.197613	-0.770311	-0.0130427	0.366157	NaN	NaN	0.759397	-0.88085	NaN	0.233498	0.339673	0.23995	NaN	-0.653383	-0.487777	0.337243	0.714884	-0.105328	0.233498	0.338826	0.146306	S	2	___1	assembly of spliceosomal tri-snRNP;cellular component assembly;cellular component assembly at cellular level;cellular component organization;cellular component organization at cellular level;cellular component organization or biogenesis;cellular component organization or biogenesis at cellular level;cellular macromolecular complex assembly;cellular macromolecular complex subunit organization;cell…	binding;identical protein binding;protein binding	Cajal body;cell part;cytoplasm;intracellular membrane-bounded organelle;intracellular organelle;intracellular organelle part;intracellular part;macromolecular complex;membrane-bounded organelle;nuclear body;nuclear part;nuclear speck;nucleoplasm;nucleoplasm part;nucleus;organelle;organelle part;ribonucleoprotein complex;small nuclear ribonucleoprotein complex;spliceosomal complex;U4/U6 x U5 tri-s…	cellular component assembly;cellular component organization;cellular macromolecular complex assembly;cellular metabolic process;cellular nitrogen compound metabolic process;cellular process;macromolecular complex assembly;macromolecule metabolic process;metabolic process;mRNA metabolic process;mRNA processing;nitrogen compound metabolic process;nucleobase-containing compound metabolic process;pri…	cell part;cytoplasm;intracellular membrane-bounded organelle;intracellular organelle;macromolecular complex;nucleoplasm;nucleus;organelle;ribonucleoprotein complex;small nuclear ribonucleoprotein complex;spliceosomal complex	Spliceosome	DUF1115;PRP3;PWI	AACTTT_UNKNOWN;ACEVEDO_LIVER_CANCER_UP;AGTCAGC,MIR-345;BASAKI_YBX1_TARGETS_UP;BIOPOLYMER_METABOLIC_PROCESS;BROWNE_HCMV_INFECTION_14HR_UP;BRUINS_UVC_RESPONSE_VIA_TP53_GROUP_D;CHEN_HOXA5_TARGETS_9HR_UP;CHIBA_RESPONSE_TO_TSA;chr1q21;ENK_UV_RESPONSE_KERATINOCYTE_UP;GAUSSMANN_MLL_AF4_FUSION_TARGETS_A_UP;GGAANCGGAANY_UNKNOWN;GGGCGGR_V$SP1_Q6;GSE13411_SWITCHED_MEMORY_BCELL_VS_PLASMA_CELL_UP;GSE14000_UNS…	3D-structure;Alternativesplicing;Completeproteome;Directproteinsequencing;Diseasemutation;mRNAprocessing;mRNAsplicing;Nucleus;Phosphoprotein;Polymorphism;Referenceproteome;Retinitispigmentosa;Spliceosome;Ublconjugation	Spliceosome	b-Adrenergic Receptor kinase substrate motif;BARD1 BRCT domain binding motif;Casein kinase I substrate motif;Casein kinase II substrate motif;G protein-coupled receptor kinase 1 substrate motif	+	CST;HTP	1	2.11921e-10	110.12	104.75	60.949	-0.91693	206840000	123180000	83664000	619	60.9487
-1.91054	-1.33347	0.634938	0.00515315	-1.95591	-0.968422	-1.9212	-0.7479	-2.19664	-1.8541	-0.765723	-0.981648	-2.27825	-0.982309	-1.22893	-2.08107	-0.83885	-1.22401	0.596525	-1.33347	-1.22401	0.109462	0.330045	S	2	___1	biological regulation;regulation of biological process;regulation of cell proliferation;regulation of cellular process	binding;identical protein binding;protein binding;protein dimerization activity;protein heterodimerization activity;protein homodimerization activity	cell part;cytoplasm;cytoplasmic part;intracellular part;perinuclear region of cytoplasm	biological regulation	cell part;cytoplasm		TPD52	AGUIRRE_PANCREATIC_CANCER_COPY_NUMBER_UP;BLALOCK_ALZHEIMERS_DISEASE_UP;BOYAULT_LIVER_CANCER_SUBCLASS_G3_UP;BROWNE_HCMV_INFECTION_20HR_DN;CAGCTTT,MIR-320;CAIRO_HEPATOBLASTOMA_CLASSES_UP;chr20q13;ENK_UV_RESPONSE_EPIDERMIS_UP;GGGCGGR_V$SP1_Q6;GRAESSMANN_APOPTOSIS_BY_DOXORUBICIN_DN;GSE10239_KLRG1INT_VS_KLRG1HIGH_EFF_CD8_TCELL_UP;GSE10325_LUPUS_BCELL_VS_LUPUS_MYELOID_DN;GSE10325_LUPUS_CD4_TCELL_VS_LUP…	Acetylation;Alternativesplicing;Coiledcoil;Completeproteome;Phosphoprotein;Referenceproteome		Casein kinase II substrate motif;Pyruvate dehydrogenase kinase substrate motif	+	CST;HTP	1	8.9076e-57	215.93	215.93	215.93	0.01337	1029900000	468650000	561220000	166	77.6455
-0.636377	-0.955171	-0.242266	-0.58474	-0.538159	-2.22607	-1.48485	NaN	-1.7038	-0.608762	-0.965957	-0.318891	-1.03347	-0.375665	-0.965067	-1.00198	-2.08197	-0.534051	0.581029	-0.795774	-0.965067	-0.169293	0.376325	S	3	___1	biological regulation;cell surface receptor linked signaling pathway;cellular process;cellular response to chemical stimulus;cellular response to cytokine stimulus;cellular response to organic substance;cellular response to stimulus;cytokine-mediated signaling pathway;posttranscriptional regulation of gene expression;regulation of biological process;regulation of biosynthetic process;regulation o…	binding;nucleic acid binding;RNA binding;RNA cap binding;translation factor activity, nucleic acid binding;translation initiation factor activity	cell part;cytoplasmic part;cytosol;eukaryotic translation initiation factor 4F complex;intracellular part;macromolecular complex;protein complex	biological regulation;cellular process;regulation of translation;response to chemical stimulus;response to stimulus;signal transduction;viral reproduction	cell part;cytosol;macromolecular complex;protein complex	RNA transport;Viral myocarditis	MA3;MIF4G;W2	ACAACTT,MIR-382;BIOCARTA_EIF_PATHWAY;BIOCARTA_EIF4_PATHWAY;BIOCARTA_MTOR_PATHWAY;BIOSYNTHETIC_PROCESS;CELLULAR_BIOSYNTHETIC_PROCESS;CELLULAR_COMPONENT_ASSEMBLY;CELLULAR_MACROMOLECULE_METABOLIC_PROCESS;CELLULAR_PROTEIN_METABOLIC_PROCESS;chr1p36;CTTGTAT,MIR-381;CYTOPLASM;CYTOPLASMIC_PART;DACOSTA_UV_RESPONSE_VIA_ERCC3_COMMON_DN;DACOSTA_UV_RESPONSE_VIA_ERCC3_DN;ENK_UV_RESPONSE_EPIDERMIS_DN;FORTSCHEGG…	3D-structure;Alternativesplicing;Coiledcoil;Completeproteome;Host-virusinteraction;Initiationfactor;Phosphoprotein;Polymorphism;Proteinbiosynthesis;Referenceproteome;Repeat;RNA-binding;Translationregulation		Calmodulin-dependent protein kinase II substrate motif;Chk1 kinase substrate motif;DNA dependent Protein kinase substrate motif;ERK1,2 kinase substrate motif;GSK-3, ERK1, ERK2, CDK5 substrate motif;PKA kinase substrate motif;PKC kinase substrate motif;WW domain binding motif	+	HTP	1	2.16883e-12	119.37	110.52	119.37	0.33595	225290000	110420000	114870000	232	119.368
0.00239623	-1.12873	0.0560753	-0.102137	-0.197842	-1.49287	-1.47581	NaN	-1.37119	-0.324789	-1.92486	-0.150157	-0.651852	0.107389	-0.192562	-1.08176	-0.592575	-0.296337	0.658765	-0.663289	-0.324789	0.3385	0.146506	S	2	___1	biological regulation;cell surface receptor linked signaling pathway;cellular process;cellular response to chemical stimulus;cellular response to cytokine stimulus;cellular response to organic substance;cellular response to stimulus;cytokine-mediated signaling pathway;posttranscriptional regulation of gene expression;regulation of biological process;regulation of biosynthetic process;regulation o…	binding;nucleic acid binding;RNA binding;RNA cap binding;translation factor activity, nucleic acid binding;translation initiation factor activity	cell part;cytoplasmic part;cytosol;eukaryotic translation initiation factor 4F complex;intracellular part;macromolecular complex;protein complex	biological regulation;cellular process;regulation of translation;response to chemical stimulus;response to stimulus;signal transduction;viral reproduction	cell part;cytosol;macromolecular complex;protein complex	RNA transport;Viral myocarditis	MA3;MIF4G;W2	ACAACTT,MIR-382;BIOCARTA_EIF_PATHWAY;BIOCARTA_EIF4_PATHWAY;BIOCARTA_MTOR_PATHWAY;BIOSYNTHETIC_PROCESS;CELLULAR_BIOSYNTHETIC_PROCESS;CELLULAR_COMPONENT_ASSEMBLY;CELLULAR_MACROMOLECULE_METABOLIC_PROCESS;CELLULAR_PROTEIN_METABOLIC_PROCESS;chr1p36;CTTGTAT,MIR-381;CYTOPLASM;CYTOPLASMIC_PART;DACOSTA_UV_RESPONSE_VIA_ERCC3_COMMON_DN;DACOSTA_UV_RESPONSE_VIA_ERCC3_DN;ENK_UV_RESPONSE_EPIDERMIS_DN;FORTSCHEGG…	3D-structure;Alternativesplicing;Coiledcoil;Completeproteome;Host-virusinteraction;Initiationfactor;Phosphoprotein;Polymorphism;Proteinbiosynthesis;Referenceproteome;Repeat;RNA-binding;Translationregulation		ERK1,2 kinase substrate motif;G protein-coupled receptor kinase 1 substrate motif;Growth associated histone HI kinase substrate motif;GSK-3, ERK1, ERK2, CDK5 substrate motif;PKA kinase substrate motif;PKC kinase substrate motif;WW domain binding motif	+	CST;HTP	1	4.10333e-14	126.26	115.5	125.79	-2.7824	771700000	461400000	310300000	495	81.849
-1.26588	-2.34959	-1.48481	-2.20722	-1.0653	-2.25497	-5.1496	NaN	-2.05336	-4.55774	NaN	NaN	-2.2487	-1.68316	-0.852097	-0.165172	-3.16193	NaN	0.885184	-2.13029	-1.96593	0.16436	0.278797	S	4	___1	actin cytoskeleton organization;actin filament-based process;cellular component organization;cellular component organization at cellular level;cellular component organization or biogenesis;cellular component organization or biogenesis at cellular level;cellular process;cortical actin cytoskeleton organization;cortical cytoskeleton organization;cytoskeleton organization;organelle organization	structural molecule activity	adherens junction;anchoring junction;cell cortex part;cell junction;cell part;cell-substrate adherens junction;cell-substrate junction;cytoplasmic part;cytoskeletal part;extracellular membrane-bounded organelle;extracellular organelle;extracellular region part;extracellular vesicular exosome;extrinsic to membrane;focal adhesion;intracellular membrane-bounded organelle;intracellular organelle;intr…	cellular component organization;cellular process;cytoskeleton organization;organelle organization	cell part;extracellular organelle;intracellular membrane-bounded organelle;intracellular organelle;membrane;nucleoplasm;nucleus;organelle;plasma membrane;vesicle	Tight junction	4_1_CTD;FA;FERM_C;FERM_M;FERM_N;SAB	ACTIN_CYTOSKELETON;BASSO_HAIRY_CELL_LEUKEMIA_DN;BROCKE_APOPTOSIS_REVERSED_BY_IL6;BRUECKNER_TARGETS_OF_MIRLET7A3_DN;CASORELLI_ACUTE_PROMYELOCYTIC_LEUKEMIA_DN;CELL_CORTEX;CELL_CORTEX_PART;CHARAFE_BREAST_CANCER_LUMINAL_VS_MESENCHYMAL_DN;CHEN_METABOLIC_SYNDROM_NETWORK;CHICAS_RB1_TARGETS_CONFLUENT;chr6q23;CORTICAL_ACTIN_CYTOSKELETON;CORTICAL_CYTOSKELETON;CREIGHTON_ENDOCRINE_THERAPY_RESISTANCE_5;CYTOPL…	Acetylation;Actin-binding;Alternativesplicing;Cellmembrane;Completeproteome;Cytoplasm;Cytoskeleton;Directproteinsequencing;Membrane;Phosphoprotein;Polymorphism;Referenceproteome		Casein kinase I substrate motif;Casein kinase II substrate motif;Cdc2 kinase substrate motif;CDK kinase substrate motif;CDK1,2,4,6 kinase substrate motif;ERK1,2 kinase substrate motif;G protein-coupled receptor kinase 1 substrate motif;Growth associated histone HI kinase substrate motif;GSK-3, ERK1, ERK2, CDK5 substrate motif;WW domain binding motif	+	HTP	0.998559	1.9225e-40	179.17	167.03	133.98	-0.12688	181350000	64778000	116570000	598	28.4082
-1.22984	-1.90407	-0.418454	-1.25787	-1.80859	-0.38692	0.419271	NaN	-0.771804	NaN	-0.959533	-1.74407	-0.766319	-0.921777	-1.70409	NaN	1.47739	-2.04482	0.952392	-1.00082	-0.959533	0.0412891	0.398318	S	2	___1	actin cytoskeleton organization;actin filament-based process;anatomical structure formation involved in morphogenesis;anatomical structure morphogenesis;apoptosis;biological regulation;blood circulation;cell death;cell junction assembly;cell junction organization;cell part morphogenesis;cell projection morphogenesis;cell projection organization;cell-cell junction assembly;cell-cell junction organ…	1-phosphatidylinositol binding;binding;cytoskeletal protein binding;lipid binding;phosphatidylinositol binding;phospholipid binding;protein binding;spectrin binding;structural constituent of cytoskeleton;structural molecule activity	adherens junction;anchoring junction;axolemma;axon part;cell cortex part;cell junction;cell part;cell projection membrane;cell projection part;cell-cell junction;cell-substrate adherens junction;cell-substrate junction;cortical cytoskeleton;cytoplasm;cytoplasmic part;cytoskeletal part;cytoskeleton;extracellular membrane-bounded organelle;extracellular organelle;extracellular region part;extracell…	anatomical structure formation involved in morphogenesis;anatomical structure morphogenesis;biological regulation;blood circulation;cell death;cell junction organization;cellular component assembly;cellular component morphogenesis;cellular component organization;cellular localization;cellular membrane organization;cellular process;circulatory system process;cytoskeleton organization;death;develop…	cell part;cytoplasm;cytoskeleton;extracellular organelle;Golgi apparatus;intracellular membrane-bounded organelle;intracellular non-membrane-bounded organelle;intracellular organelle;macromolecular complex;membrane;nucleoplasm;nucleus;organelle;plasma membrane;protein complex;vesicle	Tight junction	4_1_CTD;FA;FERM_C;FERM_M;FERM_N;SAB	AAAYWAACM_V$HFH4_01;AACTGAC,MIR-223;AACTTT_UNKNOWN;AAGTCCA,MIR-422B,MIR-422A;ACTGTGA,MIR-27A,MIR-27B;ACTIN_CYTOSKELETON;AGGCACT,MIR-515-3P;ALCALAY_AML_BY_NPM1_LOCALIZATION_UP;ALONSO_METASTASIS_UP;ATACTGT,MIR-144;ATGAAGG,MIR-205;BASSO_HAIRY_CELL_LEUKEMIA_DN;BERTUCCI_MEDULLARY_VS_DUCTAL_BREAST_CANCER_UP;BOGNI_TREATMENT_RELATED_MYELOID_LEUKEMIA_UP;BONOME_OVARIAN_CANCER_SURVIVAL_SUBOPTIMAL_DEBULKING;…	3D-structure;Acetylation;Actin-binding;Alternativesplicing;Apoptosis;Calmodulin-binding;Celljunction;Cellmembrane;Completeproteome;Cytoplasm;Cytoskeleton;Directproteinsequencing;Elliptocytosis;Glycoprotein;Hereditaryhemolyticanemia;Membrane;Nucleus;Phosphoprotein;Polymorphism;Pyropoikilocytosis;Referenceproteome;Transmembrane;Transmembranehelix;Tumorsuppressor		Casein kinase II substrate motif;NIMA kinase substrate motif;PKA kinase substrate motif;PKC kinase substrate motif	+	HTP	0.999977	0.015284	84.498	54.331	84.498	-0.34525	457650000	251790000	205870000	510	46.2957
-1.8848	-0.761447	-0.199842	-0.99294	NaN	-2.18074	NaN	NaN	-1.339	-4.71951	-1.65056	NaN	-2.37993	-1.31541	0.0995439	-0.648278	-2.24467	-3.46782	0.217388	-1.16597	-1.94761	-0.78164	0.0224021	S	2	___1	actin cytoskeleton organization;actin filament-based process;cellular component organization;cellular component organization at cellular level;cellular component organization or biogenesis;cellular component organization or biogenesis at cellular level;cellular process;cortical actin cytoskeleton organization;cortical cytoskeleton organization;cytoskeleton organization;organelle organization	structural molecule activity	adherens junction;anchoring junction;cell cortex part;cell junction;cell part;cell-substrate adherens junction;cell-substrate junction;cytoplasmic part;cytoskeletal part;extracellular membrane-bounded organelle;extracellular organelle;extracellular region part;extracellular vesicular exosome;extrinsic to membrane;focal adhesion;intracellular membrane-bounded organelle;intracellular organelle;intr…	cellular component organization;cellular process;cytoskeleton organization;organelle organization	cell part;extracellular organelle;intracellular membrane-bounded organelle;intracellular organelle;membrane;nucleoplasm;nucleus;organelle;plasma membrane;vesicle	Tight junction	4_1_CTD;FA;FERM_C;FERM_M;FERM_N;SAB	ACTIN_CYTOSKELETON;BASSO_HAIRY_CELL_LEUKEMIA_DN;BROCKE_APOPTOSIS_REVERSED_BY_IL6;BRUECKNER_TARGETS_OF_MIRLET7A3_DN;CASORELLI_ACUTE_PROMYELOCYTIC_LEUKEMIA_DN;CELL_CORTEX;CELL_CORTEX_PART;CHARAFE_BREAST_CANCER_LUMINAL_VS_MESENCHYMAL_DN;CHEN_METABOLIC_SYNDROM_NETWORK;CHICAS_RB1_TARGETS_CONFLUENT;chr6q23;CORTICAL_ACTIN_CYTOSKELETON;CORTICAL_CYTOSKELETON;CREIGHTON_ENDOCRINE_THERAPY_RESISTANCE_5;CYTOPL…	Acetylation;Actin-binding;Alternativesplicing;Cellmembrane;Completeproteome;Cytoplasm;Cytoskeleton;Directproteinsequencing;Membrane;Phosphoprotein;Polymorphism;Referenceproteome		AMP-activated protein kinase substrate motif;Calmodulin-dependent protein kinase II substrate motif;Casein kinase II substrate motif;Chk1 kinase substrate motif;PKA kinase substrate motif;PKC kinase substrate motif	+	CST;HTP	0.999842	4.9358e-13	151.99	138.59	151.99	0.34991	201690000	75124000	126560000	87	38.0062
-1.29365	-2.41115	NaN	-0.635882	NaN	-2.28081	-3.11609	NaN	-1.21909	-3.52896	NaN	-0.786453	-2.05057	-1.18453	-2.19545	-2.72216	-3.7753	-0.804178	0.595336	-1.78723	-2.12301	-0.335782	0.21917	S	2	___1			cell part;cytoplasmic membrane-bounded vesicle;cytoplasmic part;cytoplasmic vesicle;Golgi apparatus;Golgi apparatus part;integral to membrane;intracellular membrane-bounded organelle;intracellular organelle;intracellular organelle part;intracellular part;intrinsic to membrane;membrane;membrane part;membrane-bounded organelle;membrane-bounded vesicle;nuclear part;nucleoplasm;organelle;organelle pa…		cell part;cytoplasmic membrane-bounded vesicle;Golgi apparatus;intracellular membrane-bounded organelle;intracellular organelle;membrane;nucleoplasm;organelle;plasma membrane;vesicle			ACCAAAG,MIR-9;BALDWIN_PRKCI_TARGETS_UP;BASSO_B_LYMPHOCYTE_NETWORK;CACTTTG,MIR-520G,MIR-520H;CASORELLI_ACUTE_PROMYELOCYTIC_LEUKEMIA_UP;CCTGCTG,MIR-214;chr2p11;CREIGHTON_ENDOCRINE_THERAPY_RESISTANCE_3;CTCAGGG,MIR-125B,MIR-125A;CYTOPLASM;CYTOPLASMIC_MEMBRANE_BOUND_VESICLE;CYTOPLASMIC_PART;CYTOPLASMIC_VESICLE;FAELT_B_CLL_WITH_VH_REARRANGEMENTS_DN;FEVR_CTNNB1_TARGETS_UP;GCACTTT,MIR-17-5P,MIR-20A,MIR-1…	Alternativesplicing;Cellmembrane;Completeproteome;Glycoprotein;Golgiapparatus;Membrane;Phosphoprotein;Polymorphism;Referenceproteome;Repeat;Signal;Transmembrane;Transmembranehelix		b-Adrenergic Receptor kinase substrate motif;Casein kinase II substrate motif;G protein-coupled receptor kinase 1 substrate motif;PKA kinase substrate motif;PKC kinase substrate motif	+	HTP	0.972612	9.58659e-28	137.87	122.32	129.2	2.1516	204810000	75108000	129710000	298	15.5041
-0.240304	0.651756	1.85412	1.79531	NaN	3.3494	1.87386	2.67697	NaN	0.723799	2.70945	0.97822	1.26059	0.945651	1.52295	0.7645	3.35046	-0.22049	0.532849	1.85412	0.97822	-0.875896	0.0117004	S	2	___1	actin cytoskeleton organization;actin filament organization;actin filament-based movement;actin filament-based process;actin polymerization or depolymerization;biological regulation;cellular component assembly;cellular component movement;cellular component organization;cellular component organization at cellular level;cellular component organization or biogenesis;cellular component organization o…	actin binding;binding;cytoskeletal protein binding;profilin binding;protein binding	actin cytoskeleton;actin filament;cell part;cell projection;cytoplasmic membrane-bounded vesicle;cytoplasmic part;cytoplasmic vesicle;cytoskeletal part;cytoskeleton;cytosol;intracellular membrane-bounded organelle;intracellular non-membrane-bounded organelle;intracellular organelle;intracellular organelle part;intracellular part;macromolecular complex;membrane-bounded organelle;membrane-bounded v…	biological regulation;cellular component assembly;cellular component movement;cellular component organization;cellular process;cytoskeleton organization;immune system process;macromolecular complex assembly;multi-organism process;organelle organization;protein complex assembly;response to biotic stimulus;response to stimulus;response to stress;signal transduction	cell part;cell projection;cytoplasmic membrane-bounded vesicle;cytoskeleton;cytosol;intracellular membrane-bounded organelle;intracellular non-membrane-bounded organelle;intracellular organelle;macromolecular complex;organelle;protein complex;vesicle		WH2	ACTIN_BINDING;ACTIN_CYTOSKELETON;ACTIN_CYTOSKELETON_ORGANIZATION_AND_BIOGENESIS;ACTIN_FILAMENT_BASED_PROCESS;ACTIN_POLYMERIZATION_AND_OR_DEPOLYMERIZATION;ATTCTTT,MIR-186;AZARE_NEOPLASTIC_TRANSFORMATION_BY_STAT3_DN;BANDRES_RESPONSE_TO_CARMUSTIN_MGMT_48HR_DN;BANDRES_RESPONSE_TO_CARMUSTIN_WITHOUT_MGMT_48HR_DN;BOYAULT_LIVER_CANCER_SUBCLASS_G5_DN;BYSTRYKH_HEMATOPOIESIS_STEM_CELL_QTL_TRANS;CAGTATT,MIR-…	3D-structure;Actin-binding;Alternativesplicing;Cellprojection;Completeproteome;Cytoplasm;Cytoplasmicvesicle;Cytoskeleton;Phosphoprotein;Polymorphism;Referenceproteome;Repeat	CRKL-WIPF1-WAS complex;WIP-WASp-actin-myosin-IIa complex;ZAP70-CRKL-WIPF1-WAS complex	G protein-coupled receptor kinase 1 substrate motif;GSK3 kinase substrate motif;PKA kinase substrate motif;PKC kinase substrate motif	+	CST;HTP	0.999984	0.000275263	65.043	29.366	65.043	0.13568	71258000	58473000	12785000	234	47.9264
NaN	1.37249	1.45553	1.82959	0.505016	2.78038	0.645262	2.30611	-0.229794	0.906719	2.59778	1.40718	0.771804	1.3746	2.31493	1.37811	2.87648	-0.0917286	0.722941	1.41401	1.37811	-0.0358984	0.479448	S	2	___1	actin cytoskeleton organization;actin filament organization;actin filament-based movement;actin filament-based process;actin polymerization or depolymerization;biological regulation;cellular component assembly;cellular component movement;cellular component organization;cellular component organization at cellular level;cellular component organization or biogenesis;cellular component organization o…	actin binding;binding;cytoskeletal protein binding;profilin binding;protein binding	actin cytoskeleton;actin filament;cell part;cell projection;cytoplasmic membrane-bounded vesicle;cytoplasmic part;cytoplasmic vesicle;cytoskeletal part;cytoskeleton;cytosol;intracellular membrane-bounded organelle;intracellular non-membrane-bounded organelle;intracellular organelle;intracellular organelle part;intracellular part;macromolecular complex;membrane-bounded organelle;membrane-bounded v…	biological regulation;cellular component assembly;cellular component movement;cellular component organization;cellular process;cytoskeleton organization;immune system process;macromolecular complex assembly;multi-organism process;organelle organization;protein complex assembly;response to biotic stimulus;response to stimulus;response to stress;signal transduction	cell part;cell projection;cytoplasmic membrane-bounded vesicle;cytoskeleton;cytosol;intracellular membrane-bounded organelle;intracellular non-membrane-bounded organelle;intracellular organelle;macromolecular complex;organelle;protein complex;vesicle		WH2	ACTIN_BINDING;ACTIN_CYTOSKELETON;ACTIN_CYTOSKELETON_ORGANIZATION_AND_BIOGENESIS;ACTIN_FILAMENT_BASED_PROCESS;ACTIN_POLYMERIZATION_AND_OR_DEPOLYMERIZATION;ATTCTTT,MIR-186;AZARE_NEOPLASTIC_TRANSFORMATION_BY_STAT3_DN;BANDRES_RESPONSE_TO_CARMUSTIN_MGMT_48HR_DN;BANDRES_RESPONSE_TO_CARMUSTIN_WITHOUT_MGMT_48HR_DN;BOYAULT_LIVER_CANCER_SUBCLASS_G5_DN;BYSTRYKH_HEMATOPOIESIS_STEM_CELL_QTL_TRANS;CAGTATT,MIR-…	3D-structure;Actin-binding;Alternativesplicing;Cellprojection;Completeproteome;Cytoplasm;Cytoplasmicvesicle;Cytoskeleton;Phosphoprotein;Polymorphism;Referenceproteome;Repeat	CRKL-WIPF1-WAS complex;WIP-WASp-actin-myosin-IIa complex;ZAP70-CRKL-WIPF1-WAS complex	14-3-3 domain binding motif;Calmodulin-dependent protein kinase II substrate motif;Casein kinase II substrate motif;G protein-coupled receptor kinase 1 substrate motif;GSK3 kinase substrate motif;Phosphorylase kinase substrate motif;PKA kinase substrate motif;PKC kinase substrate motif	+	CST;HTP	0.999964	3.72589e-34	166.28	161.06	110.75	0.74084	242340000	203970000	38371000	340	44.9141
-0.105506	-2.17656	NaN	-0.918759	NaN	-0.576849	-1.07939	NaN	0.340264	-2.3058	-0.503012	NaN	0.296317	-0.432114	-0.779576	-2.41343	0.982996	-1.00295	0.975766	-0.747804	-0.641294	0.10651	0.332906	S	3	___1	activation of immune response;antigen receptor-mediated signaling pathway;biological regulation;blood coagulation;calcium-mediated signaling;cell activation;cell activation involved in immune response;cell surface receptor linked signaling pathway;cellular process;cellular response to stimulus;coagulation;defense response;establishment of localization;establishment of localization in cell;exocyto…	binding;binding, bridging;enzyme binding;kinase binding;protein binding;protein binding, bridging;protein kinase binding;SH3/SH2 adaptor activity;signaling adaptor activity	cell junction;cell part;cell-cell junction;cytoplasmic part;immunological synapse;integral to membrane;intracellular membrane-bounded organelle;intracellular organelle;intracellular organelle part;intracellular part;intrinsic to membrane;lysosome;lytic vacuole;macromolecular complex;mast cell granule;membrane;membrane part;membrane raft;membrane-bounded organelle;nuclear part;organelle;organelle …	biological regulation;cell activation;cellular process;coagulation;establishment of localization;exocytosis;homeostatic process;immune system process;macromolecule metabolic process;metabolic process;multicellular organismal process;regulation of body fluid levels;regulation of protein modification process;response to stimulus;response to stress;secretion;signal transduction;transport;vesicle-med…	cell part;intracellular membrane-bounded organelle;intracellular organelle;lysosome;macromolecular complex;membrane;organelle;plasma membrane;protein complex;vacuole	Fc epsilon RI signaling pathway;Fc gamma R-mediated phagocytosis;Natural killer cell mediated cytotoxicity;T cell receptor signaling pathway	LAT	BIOCARTA_NKCELLS_PATHWAY;BIOCARTA_TCR_PATHWAY;BOSCO_INTERFERON_INDUCED_ANTIVIRAL_MODULE;CAGCTG_V$AP4_Q5;CAGGTA_V$AREB6_01;CALCIUM_MEDIATED_SIGNALING;CELL_ACTIVATION;CELL_SURFACE_RECEPTOR_LINKED_SIGNAL_TRANSDUCTION_GO_0007166;chr16q13;DCA_UP.V1_DN;GCTNWTTGK_UNKNOWN;GGGAGGRR_V$MAZ_Q6;GGGTGGRR_V$PAX4_03;GNF2_ATM;GSE10239_NAIVE_VS_KLRG1HIGH_EFF_CD8_TCELL_UP;GSE11924_TH1_VS_TH17_CD4_TCELL_UP;GSE11924_…	Adaptiveimmunity;Alternativesplicing;Cellmembrane;Completeproteome;Directproteinsequencing;Immunity;Lipoprotein;Mastcelldegranulation;Membrane;Palmitate;Phosphoprotein;Referenceproteome;Signal-anchor;Transmembrane;Transmembranehelix	LAT-GRB2 complex, Fyn-mLck(KA) or Syk kinase activated;LAT-PLC-gamma-1-p85-GRB2-CBL-VAV-SLP-76 signaling complex, C305 activated;LAT-PLC-gamma-1-p85-GRB2-SOS signaling complex, C305 activated;LCK-SLP76-PLC-gamma-1-LAT complex, pervanadate-activated;PLC-gamma-1-LAT-c-CBL complex, OKT3 stimulated;PLC-gamma-1-SLP-76-SOS1-LAT complex;PLC-gamma-2-LAT complex;PLC-gamma-2-Syk-LAT-FcR-gamma complex	ATM kinase substrate motif;Casein kinase II substrate motif;DNA dependent Protein kinase substrate motif	+	CST;HTP	1	2.90272e-10	98.573	84.307	98.573	0.14374	82370000	40980000	41389000	195	71.5457
3.66068	NaN	-0.414545	NaN	2.27228	NaN	2.46082	4.88042	3.59707	0.350893	2.12799	NaN	3.3079	2.78349	2.57815	NaN	3.94301	2.85469	0.839131	3.02895	2.78349	-0.245456	0.299612	S	2	___1	activation of immune response;antigen receptor-mediated signaling pathway;biological regulation;blood coagulation;calcium-mediated signaling;cell activation;cell activation involved in immune response;cell surface receptor linked signaling pathway;cellular process;cellular response to stimulus;coagulation;defense response;establishment of localization;establishment of localization in cell;exocyto…	binding;binding, bridging;enzyme binding;kinase binding;protein binding;protein binding, bridging;protein kinase binding;SH3/SH2 adaptor activity;signaling adaptor activity	cell junction;cell part;cell-cell junction;cytoplasmic part;immunological synapse;integral to membrane;intracellular membrane-bounded organelle;intracellular organelle;intracellular organelle part;intracellular part;intrinsic to membrane;lysosome;lytic vacuole;macromolecular complex;mast cell granule;membrane;membrane part;membrane raft;membrane-bounded organelle;nuclear part;organelle;organelle …	biological regulation;cell activation;cellular process;coagulation;establishment of localization;exocytosis;homeostatic process;immune system process;macromolecule metabolic process;metabolic process;multicellular organismal process;regulation of body fluid levels;regulation of protein modification process;response to stimulus;response to stress;secretion;signal transduction;transport;vesicle-med…	cell part;intracellular membrane-bounded organelle;intracellular organelle;lysosome;macromolecular complex;membrane;organelle;plasma membrane;protein complex;vacuole	Fc epsilon RI signaling pathway;Fc gamma R-mediated phagocytosis;Natural killer cell mediated cytotoxicity;T cell receptor signaling pathway	LAT	BIOCARTA_NKCELLS_PATHWAY;BIOCARTA_TCR_PATHWAY;BOSCO_INTERFERON_INDUCED_ANTIVIRAL_MODULE;CAGCTG_V$AP4_Q5;CAGGTA_V$AREB6_01;CALCIUM_MEDIATED_SIGNALING;CELL_ACTIVATION;CELL_SURFACE_RECEPTOR_LINKED_SIGNAL_TRANSDUCTION_GO_0007166;chr16q13;DCA_UP.V1_DN;GCTNWTTGK_UNKNOWN;GGGAGGRR_V$MAZ_Q6;GGGTGGRR_V$PAX4_03;GNF2_ATM;GSE10239_NAIVE_VS_KLRG1HIGH_EFF_CD8_TCELL_UP;GSE11924_TH1_VS_TH17_CD4_TCELL_UP;GSE11924_…	Adaptiveimmunity;Alternativesplicing;Cellmembrane;Completeproteome;Directproteinsequencing;Immunity;Lipoprotein;Mastcelldegranulation;Membrane;Palmitate;Phosphoprotein;Referenceproteome;Signal-anchor;Transmembrane;Transmembranehelix	LAT-GRB2 complex, Fyn-mLck(KA) or Syk kinase activated;LAT-PLC-gamma-1-p85-GRB2-CBL-VAV-SLP-76 signaling complex, C305 activated;LAT-PLC-gamma-1-p85-GRB2-SOS signaling complex, C305 activated;LCK-SLP76-PLC-gamma-1-LAT complex, pervanadate-activated;PLC-gamma-1-LAT-c-CBL complex, OKT3 stimulated;PLC-gamma-1-SLP-76-SOS1-LAT complex;PLC-gamma-2-LAT complex;PLC-gamma-2-Syk-LAT-FcR-gamma complex	ERK1,2 kinase substrate motif;Growth associated histone HI kinase substrate motif;GSK-3, ERK1, ERK2, CDK5 substrate motif;WW domain binding motif	+	CST;HTP	1	0.000168715	84.779	72.732	78.287	2.2269	147830000	128830000	18998000	84	70.5042
-0.786033	0.0678488	0.676864	1.05579	-1.73917	0.0125278	0.0711923	0.952819	NaN	-0.311314	0.900884	0.874753	-0.080318	1.16987	0.953945	-0.0446696	0.748787	-0.79113	0.413276	0.0695206	0.748787	0.679266	0.0248982	S	2	___1	associative learning;asymmetric cell division;behavior;biological regulation;cell cycle phase;cell cycle process;cell division;cell surface receptor linked signaling pathway;cellular component organization;cellular component organization at cellular level;cellular component organization or biogenesis;cellular component organization or biogenesis at cellular level;cellular process;cellular respons…	binding;cytoskeletal protein binding;enzyme activator activity;enzyme regulator activity;GDP-dissociation inhibitor activity;GTPase activator activity;GTPase regulator activity;microtubule binding;molecular transducer activity;nucleoside-triphosphatase regulator activity;protein binding;protein complex scaffold;receptor signaling complex scaffold activity;receptor signaling protein activity;signa…	cell junction;cell part;cell projection;cell projection part;centrosome;cytoplasm;cytoplasmic part;cytoskeletal part;dendrite;dendritic spine;intracellular membrane-bounded organelle;intracellular non-membrane-bounded organelle;intracellular organelle;intracellular organelle part;intracellular part;macromolecular complex;membrane;membrane-bounded organelle;microtubule;microtubule organizing cente…	behavior;biological regulation;cell division;cellular component organization;cellular process;chromosome segregation;cytoskeleton organization;establishment of localization;mitosis;multicellular organismal process;neurological system process;nuclear division;nuclear transport;nucleocytoplasmic transport;organelle fission;organelle organization;regulation of protein modification process;response t…	cell part;cell projection;centrosome;cytoplasm;intracellular membrane-bounded organelle;intracellular non-membrane-bounded organelle;intracellular organelle;macromolecular complex;membrane;microtubule organizing center;neuron projection;nucleus;organelle;plasma membrane;protein complex		GoLoco;RBD;RGS	ACOSTA_PROLIFERATION_INDEPENDENT_MYC_TARGETS_UP;BLALOCK_ALZHEIMERS_DISEASE_DN;BLALOCK_ALZHEIMERS_DISEASE_INCIPIENT_DN;BONOME_OVARIAN_CANCER_SURVIVAL_OPTIMAL_DEBULKING;CELL_SURFACE_RECEPTOR_LINKED_SIGNAL_TRANSDUCTION_GO_0007166;CHEN_METABOLIC_SYNDROM_NETWORK;chr5q35;DARWICHE_PAPILLOMA_PROGRESSION_RISK;DODD_NASOPHARYNGEAL_CARCINOMA_UP;ENZYME_ACTIVATOR_ACTIVITY;ENZYME_REGULATOR_ACTIVITY;G_PROTEIN_CO…	3D-structure;Alternativesplicing;Cellcycle;Celldivision;Celljunction;Cellmembrane;Cellprojection;Completeproteome;Cytoplasm;Cytoskeleton;GTPaseactivation;Membrane;Microtubule;Nucleus;Phosphoprotein;Postsynapticcellmembrane;Referenceproteome;Repeat;Signaltransductioninhibitor;Synapse		14-3-3 domain binding motif;Calmodulin-dependent protein kinase II substrate motif;ERK1,2 kinase substrate motif;G protein-coupled receptor kinase 1 substrate motif;GSK-3, ERK1, ERK2, CDK5 substrate motif;MAPKAPK2 kinase substrate motif;PKA kinase substrate motif;PKC kinase substrate motif;WW domain binding motif	+	CST;HTP	1	7.0085e-05	117.28	68.585	117.28	0.42168	420500000	310760000	109730000	203	67.7934
-0.314119	1.17979	1.39385	1.90471	-0.995639	-0.0847667	0.221605	1.74448	-0.335857	0.574755	1.56186	1.71346	0.432264	1.80807	1.44708	0.476517	1.13517	0.20201	0.22709	0.221605	1.13517	0.913562	0.00483372	S	2	___1	associative learning;asymmetric cell division;behavior;biological regulation;cell cycle phase;cell cycle process;cell division;cell surface receptor linked signaling pathway;cellular component organization;cellular component organization at cellular level;cellular component organization or biogenesis;cellular component organization or biogenesis at cellular level;cellular process;cellular respons…	binding;cytoskeletal protein binding;enzyme activator activity;enzyme regulator activity;GDP-dissociation inhibitor activity;GTPase activator activity;GTPase regulator activity;microtubule binding;molecular transducer activity;nucleoside-triphosphatase regulator activity;protein binding;protein complex scaffold;receptor signaling complex scaffold activity;receptor signaling protein activity;signa…	cell junction;cell part;cell projection;cell projection part;centrosome;cytoplasm;cytoplasmic part;cytoskeletal part;dendrite;dendritic spine;intracellular membrane-bounded organelle;intracellular non-membrane-bounded organelle;intracellular organelle;intracellular organelle part;intracellular part;macromolecular complex;membrane;membrane-bounded organelle;microtubule;microtubule organizing cente…	behavior;biological regulation;cell division;cellular component organization;cellular process;chromosome segregation;cytoskeleton organization;establishment of localization;mitosis;multicellular organismal process;neurological system process;nuclear division;nuclear transport;nucleocytoplasmic transport;organelle fission;organelle organization;regulation of protein modification process;response t…	cell part;cell projection;centrosome;cytoplasm;intracellular membrane-bounded organelle;intracellular non-membrane-bounded organelle;intracellular organelle;macromolecular complex;membrane;microtubule organizing center;neuron projection;nucleus;organelle;plasma membrane;protein complex		GoLoco;RBD;RGS	ACOSTA_PROLIFERATION_INDEPENDENT_MYC_TARGETS_UP;BLALOCK_ALZHEIMERS_DISEASE_DN;BLALOCK_ALZHEIMERS_DISEASE_INCIPIENT_DN;BONOME_OVARIAN_CANCER_SURVIVAL_OPTIMAL_DEBULKING;CELL_SURFACE_RECEPTOR_LINKED_SIGNAL_TRANSDUCTION_GO_0007166;CHEN_METABOLIC_SYNDROM_NETWORK;chr5q35;DARWICHE_PAPILLOMA_PROGRESSION_RISK;DODD_NASOPHARYNGEAL_CARCINOMA_UP;ENZYME_ACTIVATOR_ACTIVITY;ENZYME_REGULATOR_ACTIVITY;G_PROTEIN_CO…	3D-structure;Alternativesplicing;Cellcycle;Celldivision;Celljunction;Cellmembrane;Cellprojection;Completeproteome;Cytoplasm;Cytoskeleton;GTPaseactivation;Membrane;Microtubule;Nucleus;Phosphoprotein;Postsynapticcellmembrane;Referenceproteome;Repeat;Signaltransductioninhibitor;Synapse		Casein kinase II substrate motif;G protein-coupled receptor kinase 1 substrate motif;MAPKAPK2 kinase substrate motif;PKA kinase substrate motif;PKC kinase substrate motif	+	HTP	1	6.34161e-34	173.37	151.7	139.11	0.036917	901090000	644280000	256810000	288	64.3348
-2.38197	0.563535	NaN	2.06444	NaN	-0.205317	-0.698713	1.90084	-0.208432	-0.7889	NaN	0.455294	0.503044	0.699297	1.65024	0.207278	0.832042	-0.660563	0.748275	-0.205317	0.479169	0.684486	0.0240971	S	3	___1	biological adhesion;biological regulation;cell adhesion;cellular component organization;cellular component organization or biogenesis;cellular membrane organization;cellular process;cellular response to stimulus;defense response;endocytosis;establishment of localization;immune response;immune system process;inflammatory response;innate immune response;intracellular receptor mediated signaling pat…		actin filament bundle;actomyosin;actomyosin contractile ring;cell cortex part;cell division site part;cell part;cell projection;cleavage furrow;contractile ring;cytoplasmic part;cytoskeletal part;cytosol;intracellular organelle part;intracellular part;lamellipodium;membrane;organelle part;perinuclear region of cytoplasm;stress fiber;uropod	biological adhesion;biological regulation;cell adhesion;cellular component organization;cellular membrane organization;cellular process;endocytosis;establishment of localization;immune system process;membrane invagination;membrane organization;response to stimulus;response to stress;signal transduction;transport;vesicle-mediated transport	cell part;cell projection;cytosol;membrane	NOD-like receptor signaling pathway	FCH;SH3_9	ALCALA_APOPTOSIS;ATF2_S_UP.V1_UP;BRUINS_UVC_RESPONSE_LATE;CAGGTG_V$E12_Q6;CAHOY_ASTROGLIAL;CHIARADONNA_NEOPLASTIC_TRANSFORMATION_KRAS_DN;chr15q24;DUNNE_TARGETS_OF_AML1_MTG8_FUSION_UP;FERREIRA_EWINGS_SARCOMA_UNSTABLE_VS_STABLE_UP;FULCHER_INFLAMMATORY_RESPONSE_LECTIN_VS_LPS_UP;GNF2_CASP1;GNF2_CASP4;GNF2_CD97;GNF2_ICAM3;GNF2_ITGB2;GNF2_PTPRC;GNF2_S100A4;GNF2_TNFRSF1B;GRAESSMANN_APOPTOSIS_BY_DOXORUBI…	3D-structure;Alternativesplicing;Celladhesion;Cellprojection;Coiledcoil;Completeproteome;Cytoplasm;Cytoskeleton;Diseasemutation;Endocytosis;Immunity;Inflammatoryresponse;Innateimmunity;Phosphoprotein;Polymorphism;Referenceproteome;SH3domain		Calmodulin-dependent protein kinase II substrate motif;Chk1 kinase substrate motif;PAK2 kinase substrate motif;PKA kinase substrate motif;PKC kinase substrate motif	+	CST	1	2.37072e-11	122.33	112.14	122.33	-0.22622	98801000	64461000	34340000	312	77.1201
-1.54344	-1.72935	-0.904195	-0.330734	-1.03561	0.753883	-1.80322	-0.863836	-2.53437	-1.20184	-0.599455	-1.57	-1.73814	-0.712275	0.223104	-0.318698	-0.591116	-2.98873	0.90416	-1.03561	-0.712275	0.323334	0.156001	S	2	___1	biological regulation;catabolic process;cell differentiation;cell proliferation;cellular catabolic process;cellular developmental process;cellular metabolic process;cellular nitrogen compound catabolic process;cellular nitrogen compound metabolic process;cellular process;deoxyribonucleoside monophosphate catabolic process;deoxyribonucleoside monophosphate metabolic process;deoxyribonucleotide cat…	catalytic activity;deoxyribonucleoside 5'-monophosphate N-glycosidase activity;hydrolase activity;hydrolase activity, acting on glycosyl bonds;hydrolase activity, hydrolyzing N-glycosyl compounds;nucleoside deoxyribosyltransferase activity;transferase activity;transferase activity, transferring glycosyl groups;transferase activity, transferring pentosyl groups	cell part;cytoplasm;extracellular membrane-bounded organelle;extracellular organelle;extracellular region part;extracellular vesicular exosome;intracellular membrane-bounded organelle;intracellular organelle;intracellular organelle part;intracellular part;membrane-bounded organelle;membrane-bounded vesicle;nuclear part;nucleoplasm;nucleus;organelle;organelle part;vesicle	biological regulation;catabolic process;cell differentiation;cell proliferation;cellular metabolic process;cellular nitrogen compound metabolic process;cellular process;developmental process;metabolic process;nitrogen compound metabolic process;nucleobase-containing compound catabolic process;nucleobase-containing compound metabolic process;nucleobase-containing small molecule metabolic process;n…	cell part;cytoplasm;extracellular organelle;intracellular membrane-bounded organelle;intracellular organelle;nucleoplasm;nucleus;organelle;vesicle		Nuc_deoxyrib_tr		3D-structure;Acetylation;Alternativesplicing;Completeproteome;Cytoplasm;Glycosidase;Hydrolase;Nucleotidemetabolism;Nucleus;Phosphoprotein;Referenceproteome		14-3-3 domain binding motif;b-Adrenergic Receptor kinase substrate motif;Calmodulin-dependent protein kinase II substrate motif;Casein kinase II substrate motif;CLK1 kinase substrate motif;PKA kinase substrate motif;PKC kinase substrate motif	+	HTP	1	8.57412e-06	121.31	81.11	121.31	0.56023	661440000	352110000	309320000	12	63.0269
-1.2068	-1.64817	0.423393	-0.316793	-0.716899	0.544271	-0.328817	0.728539	-1.58053	NaN	-0.748227	-0.77191	-0.969538	-0.39824	-0.375875	NaN	1.24377	NaN	0.794369	-0.328817	-0.573234	-0.244416	0.300612	S	2	___1	biological regulation;negative regulation of biological process;negative regulation of cell communication;negative regulation of cellular process;negative regulation of G-protein coupled receptor protein signaling pathway;negative regulation of response to stimulus;negative regulation of signal transduction;negative regulation of signaling;positive regulation of catalytic activity;positive regula…	enzyme activator activity;enzyme regulator activity;GTPase activator activity;GTPase regulator activity;nucleoside-triphosphatase regulator activity	axon part;axon terminus;cell body;cell part;cell projection;cell projection part;cytoplasm;dendritic spine;intracellular membrane-bounded organelle;intracellular organelle;intracellular part;membrane;membrane-bounded organelle;neuron projection;neuron projection terminus;neuron spine;neuronal cell body;nucleus;organelle;plasma membrane	biological regulation	cell body;cell part;cell projection;cytoplasm;intracellular membrane-bounded organelle;intracellular organelle;membrane;neuron projection;neuronal cell body;nucleus;organelle;plasma membrane		RGS	ALCALAY_AML_BY_NPM1_LOCALIZATION_DN;BAELDE_DIABETIC_NEPHROPATHY_DN;BENPORATH_EED_TARGETS;BENPORATH_ES_WITH_H3K27ME3;BENPORATH_NANOG_TARGETS;BENPORATH_PRC2_TARGETS;BENPORATH_SOX2_TARGETS;BENPORATH_SUZ12_TARGETS;CHEN_METABOLIC_SYNDROM_NETWORK;CHICAS_RB1_TARGETS_CONFLUENT;chr10q25;DAVICIONI_MOLECULAR_ARMS_VS_ERMS_DN;DIAZ_CHRONIC_MEYLOGENOUS_LEUKEMIA_UP;DITTMER_PTHLH_TARGETS_DN;DOANE_RESPONSE_TO_ANDR…	3D-structure;Alternativesplicing;Completeproteome;Lipoprotein;Palmitate;Phosphoprotein;Polymorphism;Referenceproteome;Signaltransductioninhibitor		G protein-coupled receptor kinase 1 substrate motif;PKA kinase substrate motif;PKC kinase substrate motif	+	HTP	0.999701	0.00649598	70.399	28.972	70.399	0.44729	249240000	145710000	103520000	10	35.2465
NaN	0.592771	NaN	0.004023	0.473071	0.651806	0.896529	0.329378	0.530783	0.415478	0.481473	0.142475	0.4785	0.781605	0.239684	0.508724	0.545609	5.45757	0.396151	0.530783	0.481473	-0.0493097	0.49373	S	3	___1	biological regulation;biosynthetic process;cellular biosynthetic process;cellular macromolecule biosynthetic process;cellular macromolecule metabolic process;cellular metabolic process;cellular nitrogen compound metabolic process;cellular process;macromolecule biosynthetic process;macromolecule metabolic process;metabolic process;nitrogen compound metabolic process;nucleic acid metabolic process;…	binding;nucleotide binding	cell part;intracellular membrane-bounded organelle;intracellular organelle;intracellular organelle part;intracellular part;membrane-bounded organelle;nuclear part;nucleoplasm;nucleus;organelle;organelle part	biological regulation;biosynthetic process;cellular metabolic process;cellular nitrogen compound metabolic process;cellular process;macromolecule metabolic process;metabolic process;nitrogen compound metabolic process;nucleobase-containing compound metabolic process;primary metabolic process;RNA metabolic process	cell part;intracellular membrane-bounded organelle;intracellular organelle;nucleoplasm;nucleus;organelle		RRM_1	ACEVEDO_LIVER_TUMOR_VS_NORMAL_ADJACENT_TISSUE_UP;BIOPOLYMER_METABOLIC_PROCESS;CAGGTG_V$E12_Q6;CHEOK_RESPONSE_TO_MERCAPTOPURINE_AND_LD_MTX_UP;CHIARADONNA_NEOPLASTIC_TRANSFORMATION_CDC25_UP;chrxq26;DIAZ_CHRONIC_MEYLOGENOUS_LEUKEMIA_UP;GCM_DDX5;GCM_RAD21;GGGCGGR_V$SP1_Q6;GRAESSMANN_APOPTOSIS_BY_DOXORUBICIN_DN;GRAESSMANN_APOPTOSIS_BY_SERUM_DEPRIVATION_UP;GSE12845_NAIVE_VS_PRE_GC_TONSIL_BCELL_DN;GSE14…	3D-structure;Acetylation;Activator;Completeproteome;Directproteinsequencing;Nucleus;Phosphoprotein;Polymorphism;Referenceproteome;Repeat;RNA-binding;Transcription;Transcriptionregulation	RNA pol II containing coactivator complex Tat-SF;Spliceosome	Casein kinase I substrate motif;Casein kinase II substrate motif;G protein-coupled receptor kinase 1 substrate motif;PKA kinase substrate motif;PKC kinase substrate motif	+	CST;HTP	1	9.84147e-34	150.72	139.13	130.83	-0.62104	974510000	686360000	288150000	579	130.829
1.16927	0.988838	0.710931	0.592278	1.29907	1.45869	0.96844	1.03998	1.01662	0.924405	0.943786	0.862632	0.861257	0.665996	0.225477	0.43144	1.01633	1.69855	0.292856	1.01662	0.862632	-0.153991	0.392472	S	3	___1	biological regulation;biosynthetic process;cellular biosynthetic process;cellular macromolecule biosynthetic process;cellular macromolecule metabolic process;cellular metabolic process;cellular nitrogen compound metabolic process;cellular process;macromolecule biosynthetic process;macromolecule metabolic process;metabolic process;nitrogen compound metabolic process;nucleic acid metabolic process;…	binding;nucleotide binding	cell part;intracellular membrane-bounded organelle;intracellular organelle;intracellular organelle part;intracellular part;membrane-bounded organelle;nuclear part;nucleoplasm;nucleus;organelle;organelle part	biological regulation;biosynthetic process;cellular metabolic process;cellular nitrogen compound metabolic process;cellular process;macromolecule metabolic process;metabolic process;nitrogen compound metabolic process;nucleobase-containing compound metabolic process;primary metabolic process;RNA metabolic process	cell part;intracellular membrane-bounded organelle;intracellular organelle;nucleoplasm;nucleus;organelle		RRM_1	ACEVEDO_LIVER_TUMOR_VS_NORMAL_ADJACENT_TISSUE_UP;BIOPOLYMER_METABOLIC_PROCESS;CAGGTG_V$E12_Q6;CHEOK_RESPONSE_TO_MERCAPTOPURINE_AND_LD_MTX_UP;CHIARADONNA_NEOPLASTIC_TRANSFORMATION_CDC25_UP;chrxq26;DIAZ_CHRONIC_MEYLOGENOUS_LEUKEMIA_UP;GCM_DDX5;GCM_RAD21;GGGCGGR_V$SP1_Q6;GRAESSMANN_APOPTOSIS_BY_DOXORUBICIN_DN;GRAESSMANN_APOPTOSIS_BY_SERUM_DEPRIVATION_UP;GSE12845_NAIVE_VS_PRE_GC_TONSIL_BCELL_DN;GSE14…	3D-structure;Acetylation;Activator;Completeproteome;Directproteinsequencing;Nucleus;Phosphoprotein;Polymorphism;Referenceproteome;Repeat;RNA-binding;Transcription;Transcriptionregulation	RNA pol II containing coactivator complex Tat-SF;Spliceosome	Casein kinase II substrate motif;Cdc2 kinase substrate motif;CDK kinase substrate motif;CDK1,2,4,6 kinase substrate motif;ERK1,2 kinase substrate motif;Growth associated histone HI kinase substrate motif;GSK-3, ERK1, ERK2, CDK5 substrate motif;MDC1 BRCT domain binding motif;PKA kinase substrate motif;PKC kinase substrate motif;Plk1 PBD domain binding motif;WW domain binding motif	+	HTP	0.991138	7.40676e-96	206.48	197.72	180.65	0.029967	1741500000	1311500000	429990000	453	20.4862
NaN	0.486462	NaN	1.12056	NaN	0.030915	0.516862	NaN	-0.103011	-0.24933	0.165474	1.00428	NaN	0.478888	0.455352	0.823418	0.0552873	-0.180139	0.742563	0.486462	0.310413	-0.176049	0.369262	S	2	___1	biological regulation;biosynthetic process;cellular biosynthetic process;cellular macromolecule biosynthetic process;cellular macromolecule metabolic process;cellular metabolic process;cellular nitrogen compound metabolic process;cellular process;macromolecule biosynthetic process;macromolecule metabolic process;metabolic process;nitrogen compound metabolic process;nucleic acid metabolic process;…	binding;nucleotide binding	cell part;intracellular membrane-bounded organelle;intracellular organelle;intracellular organelle part;intracellular part;membrane-bounded organelle;nuclear part;nucleoplasm;nucleus;organelle;organelle part	biological regulation;biosynthetic process;cellular metabolic process;cellular nitrogen compound metabolic process;cellular process;macromolecule metabolic process;metabolic process;nitrogen compound metabolic process;nucleobase-containing compound metabolic process;primary metabolic process;RNA metabolic process	cell part;intracellular membrane-bounded organelle;intracellular organelle;nucleoplasm;nucleus;organelle		RRM_1	ACEVEDO_LIVER_TUMOR_VS_NORMAL_ADJACENT_TISSUE_UP;BIOPOLYMER_METABOLIC_PROCESS;CAGGTG_V$E12_Q6;CHEOK_RESPONSE_TO_MERCAPTOPURINE_AND_LD_MTX_UP;CHIARADONNA_NEOPLASTIC_TRANSFORMATION_CDC25_UP;chrxq26;DIAZ_CHRONIC_MEYLOGENOUS_LEUKEMIA_UP;GCM_DDX5;GCM_RAD21;GGGCGGR_V$SP1_Q6;GRAESSMANN_APOPTOSIS_BY_DOXORUBICIN_DN;GRAESSMANN_APOPTOSIS_BY_SERUM_DEPRIVATION_UP;GSE12845_NAIVE_VS_PRE_GC_TONSIL_BCELL_DN;GSE14…	3D-structure;Acetylation;Activator;Completeproteome;Directproteinsequencing;Nucleus;Phosphoprotein;Polymorphism;Referenceproteome;Repeat;RNA-binding;Transcription;Transcriptionregulation	RNA pol II containing coactivator complex Tat-SF;Spliceosome	b-Adrenergic Receptor kinase substrate motif;Casein kinase I substrate motif;Casein kinase II substrate motif	+	CST;HTP	1	1.4832e-41	141.48	136.47	47.621	0.88781	186980000	120500000	66482000	702	47.6215
0.619362	0.878127	NaN	-0.115879	1.76061	0.963578	0.508665	NaN	0.4491	0.907408	0.704819	0.393637	1.32879	0.461404	0.487311	0.0758164	0.739119	1.27007	0.952296	0.619362	0.704819	0.0854577	0.35358	S	3	___1	biological regulation;biosynthetic process;cellular biosynthetic process;cellular macromolecule biosynthetic process;cellular macromolecule metabolic process;cellular metabolic process;cellular nitrogen compound metabolic process;cellular process;macromolecule biosynthetic process;macromolecule metabolic process;metabolic process;nitrogen compound metabolic process;nucleic acid metabolic process;…	binding;nucleotide binding	cell part;intracellular membrane-bounded organelle;intracellular organelle;intracellular organelle part;intracellular part;membrane-bounded organelle;nuclear part;nucleoplasm;nucleus;organelle;organelle part	biological regulation;biosynthetic process;cellular metabolic process;cellular nitrogen compound metabolic process;cellular process;macromolecule metabolic process;metabolic process;nitrogen compound metabolic process;nucleobase-containing compound metabolic process;primary metabolic process;RNA metabolic process	cell part;intracellular membrane-bounded organelle;intracellular organelle;nucleoplasm;nucleus;organelle		RRM_1	ACEVEDO_LIVER_TUMOR_VS_NORMAL_ADJACENT_TISSUE_UP;BIOPOLYMER_METABOLIC_PROCESS;CAGGTG_V$E12_Q6;CHEOK_RESPONSE_TO_MERCAPTOPURINE_AND_LD_MTX_UP;CHIARADONNA_NEOPLASTIC_TRANSFORMATION_CDC25_UP;chrxq26;DIAZ_CHRONIC_MEYLOGENOUS_LEUKEMIA_UP;GCM_DDX5;GCM_RAD21;GGGCGGR_V$SP1_Q6;GRAESSMANN_APOPTOSIS_BY_DOXORUBICIN_DN;GRAESSMANN_APOPTOSIS_BY_SERUM_DEPRIVATION_UP;GSE12845_NAIVE_VS_PRE_GC_TONSIL_BCELL_DN;GSE14…	3D-structure;Acetylation;Activator;Completeproteome;Directproteinsequencing;Nucleus;Phosphoprotein;Polymorphism;Referenceproteome;Repeat;RNA-binding;Transcription;Transcriptionregulation	RNA pol II containing coactivator complex Tat-SF;Spliceosome	b-Adrenergic Receptor kinase substrate motif	+	CST;HTP	1	2.63601e-160	249	242.2	82.726	-0.35883	852470000	603770000	248710000	676	82.7264
0.444062	0.934156	0.878646	0.256724	1.1008	0.666609	0.718628	0.643132	0.4113	0.534351	0.463696	0.424197	0.841158	0.470295	-0.00952805	0.181266	0.731432	0.893538	0.223453	0.666609	0.470295	-0.196314	0.348349	S	3	___1	biological regulation;biosynthetic process;cellular biosynthetic process;cellular macromolecule biosynthetic process;cellular macromolecule metabolic process;cellular metabolic process;cellular nitrogen compound metabolic process;cellular process;macromolecule biosynthetic process;macromolecule metabolic process;metabolic process;nitrogen compound metabolic process;nucleic acid metabolic process;…	binding;nucleotide binding	cell part;intracellular membrane-bounded organelle;intracellular organelle;intracellular organelle part;intracellular part;membrane-bounded organelle;nuclear part;nucleoplasm;nucleus;organelle;organelle part	biological regulation;biosynthetic process;cellular metabolic process;cellular nitrogen compound metabolic process;cellular process;macromolecule metabolic process;metabolic process;nitrogen compound metabolic process;nucleobase-containing compound metabolic process;primary metabolic process;RNA metabolic process	cell part;intracellular membrane-bounded organelle;intracellular organelle;nucleoplasm;nucleus;organelle		RRM_1	ACEVEDO_LIVER_TUMOR_VS_NORMAL_ADJACENT_TISSUE_UP;BIOPOLYMER_METABOLIC_PROCESS;CAGGTG_V$E12_Q6;CHEOK_RESPONSE_TO_MERCAPTOPURINE_AND_LD_MTX_UP;CHIARADONNA_NEOPLASTIC_TRANSFORMATION_CDC25_UP;chrxq26;DIAZ_CHRONIC_MEYLOGENOUS_LEUKEMIA_UP;GCM_DDX5;GCM_RAD21;GGGCGGR_V$SP1_Q6;GRAESSMANN_APOPTOSIS_BY_DOXORUBICIN_DN;GRAESSMANN_APOPTOSIS_BY_SERUM_DEPRIVATION_UP;GSE12845_NAIVE_VS_PRE_GC_TONSIL_BCELL_DN;GSE14…	3D-structure;Acetylation;Activator;Completeproteome;Directproteinsequencing;Nucleus;Phosphoprotein;Polymorphism;Referenceproteome;Repeat;RNA-binding;Transcription;Transcriptionregulation	RNA pol II containing coactivator complex Tat-SF;Spliceosome	b-Adrenergic Receptor kinase substrate motif;Casein kinase I substrate motif;Casein kinase II substrate motif	+	CST;HTP	1	2.83582e-189	296.62	287.42	268.22	-0.53445	1212200000	861810000	350360000	642	178.122
NaN	-1.22518	-0.0945549	-0.371613	-1.88813	-1.07501	-1.19163	NaN	NaN	-0.372913	-0.969316	-0.855217	NaN	-0.679447	NaN	-1.31288	-0.624131	NaN	0.577541	-1.13332	-0.767332	0.365989	0.130303	S	3	___1	biological regulation;cell cycle;cell cycle phase;cell cycle process;cell division;cellular component organization;cellular component organization at cellular level;cellular component organization or biogenesis;cellular component organization or biogenesis at cellular level;cellular process;establishment of localization;G2/M transition of mitotic cell cycle;mitosis;mitotic cell cycle;negative reg…	binding;channel inhibitor activity;channel regulator activity;enzyme binding;enzyme inhibitor activity;enzyme regulator activity;ion channel inhibitor activity;phosphatase binding;phosphatase inhibitor activity;phosphatase regulator activity;potassium channel inhibitor activity;potassium channel regulator activity;protein binding;protein phosphatase 2A binding;protein phosphatase binding;protein …	cell part;cytoplasm;intracellular organelle part;intracellular part;nuclear part;nucleoplasm;organelle part	biological regulation;cell cycle;cell division;cellular component organization;cellular process;establishment of localization;mitosis;mitotic cell cycle;nuclear division;organelle fission;organelle organization;regulation of transport;response to chemical stimulus;response to external stimulus;response to extracellular stimulus;response to stimulus;transport	cell part;cytoplasm;nucleoplasm		Endosulfine	AGGGCAG,MIR-18A;AUXILIARY_TRANSPORT_PROTEIN_ACTIVITY;BENPORATH_NANOG_TARGETS;BENPORATH_SOX2_TARGETS;BERNARD_PPAPDC1B_TARGETS_UP;BLALOCK_ALZHEIMERS_DISEASE_DN;BONOME_OVARIAN_CANCER_SURVIVAL_OPTIMAL_DEBULKING;BUYTAERT_PHOTODYNAMIC_THERAPY_STRESS_DN;CASORELLI_ACUTE_PROMYELOCYTIC_LEUKEMIA_DN;CCAGGGG,MIR-331;CHANNEL_REGULATOR_ACTIVITY;CHARAFE_BREAST_CANCER_LUMINAL_VS_MESENCHYMAL_UP;chr1q21;CREIGHTON_E…	Acetylation;Alternativesplicing;Cellcycle;Celldivision;Completeproteome;Cytoplasm;Mitosis;Phosphoprotein;Proteinphosphataseinhibitor;Referenceproteome		ATM kinase substrate motif;DNA dependent Protein kinase substrate motif;PKA kinase substrate motif;PKC kinase substrate motif	+	HTP	1	2.9416e-68	168.09	168.09	168.09	0.69958	150800000	72523000	78272000	2	143.425
-3.47314	-1.37856	-1.18084	-1.12966	-2.00061	-1.91027	-1.89773	-0.75474	-3.12747	-1.92044	-0.980919	-2.05553	-2.41769	-2.09343	-1.20091	-1.72602	-0.988871	-4.39314	0.827013	-1.89773	-1.92044	-0.0227079	0.465428	S	2	___1	biological regulation;cell cycle;cell cycle phase;cell cycle process;cell division;cell surface receptor linked signaling pathway;cellular component organization;cellular component organization at cellular level;cellular component organization or biogenesis;cellular component organization or biogenesis at cellular level;cellular process;cellular response to stimulus;dopamine receptor signaling pa…	binding;channel inhibitor activity;channel regulator activity;enzyme binding;enzyme inhibitor activity;enzyme regulator activity;ion channel inhibitor activity;phosphatase binding;phosphatase inhibitor activity;phosphatase regulator activity;potassium channel inhibitor activity;potassium channel regulator activity;protein binding;protein phosphatase 2A binding;protein phosphatase binding;protein …	cell part;cytoplasm;intracellular organelle part;intracellular part;nuclear part;nucleoplasm;organelle part	biological regulation;cell cycle;cell division;cellular component organization;cellular process;establishment of localization;mitosis;mitotic cell cycle;nuclear division;organelle fission;organelle organization;regulation of transport;response to chemical stimulus;response to external stimulus;response to extracellular stimulus;response to stimulus;signal transduction;transport	cell part;cytoplasm;nucleoplasm		Endosulfine	AAGCACA,MIR-218;ACAACCT,MIR-453;ACEVEDO_LIVER_CANCER_UP;ACEVEDO_LIVER_TUMOR_VS_NORMAL_ADJACENT_TISSUE_UP;ACTGAAA,MIR-30A-3P,MIR-30E-3P;AGGGCAG,MIR-18A;ALCOHOL_METABOLIC_PROCESS;AUXILIARY_TRANSPORT_PROTEIN_ACTIVITY;BENPORATH_MYC_MAX_TARGETS;BENPORATH_NANOG_TARGETS;BENPORATH_SOX2_TARGETS;BERNARD_PPAPDC1B_TARGETS_UP;BIDUS_METASTASIS_UP;BIOSYNTHETIC_PROCESS;BLALOCK_ALZHEIMERS_DISEASE_DN;BLUM_RESPONSE…	Acetylation;Alternativesplicing;Cellcycle;Celldivision;Completeproteome;Cytoplasm;Mitosis;Phosphoprotein;Proteinphosphataseinhibitor;Referenceproteome		b-Adrenergic Receptor kinase substrate motif;Casein kinase II substrate motif;PKA kinase substrate motif	+	CST;HTP;LTP	1	6.03296e-07	117.7	114.13	117.7	-0.27228	1384100000	532310000	851770000	67	65.4569
-0.0904484	-0.911136	NaN	-0.738024	0.341744	-0.348318	-0.0875119	-1.83135	-0.151253	-0.888266	-0.829501	-0.639853	-0.588414	-0.829143	-1.08176	-0.685882	-0.655648	-0.410242	0.32834	-0.249785	-0.685882	-0.436096	0.146383	S	3	___1	biological regulation;cell cycle phase;cell cycle process;cellular component organization;cellular component organization at cellular level;cellular component organization or biogenesis;cellular component organization or biogenesis at cellular level;cellular macromolecule metabolic process;cellular metabolic process;cellular nitrogen compound metabolic process;cellular process;cellular response t…	binding;cation binding;DNA binding;double-stranded DNA binding;ion binding;metal ion binding;nucleic acid binding;structure-specific DNA binding;transition metal ion binding;zinc ion binding	cell part;chromosome;condensed chromosome;cytoplasmic part;female pronucleus;Golgi apparatus;intracellular membrane-bounded organelle;intracellular non-membrane-bounded organelle;intracellular organelle;intracellular organelle part;intracellular part;membrane;membrane-bounded organelle;mitochondrion;non-membrane-bounded organelle;nuclear matrix;nuclear part;nucleoplasm;nucleus;organelle;organelle…	biological regulation;cellular component organization;cellular metabolic process;cellular nitrogen compound metabolic process;cellular process;chromosome organization;DNA metabolic process;DNA packaging;macromolecule metabolic process;metabolic process;mitosis;nitrogen compound metabolic process;nuclear division;nucleobase-containing compound metabolic process;organelle fission;organelle organiza…	cell part;chromosome;Golgi apparatus;intracellular membrane-bounded organelle;intracellular non-membrane-bounded organelle;intracellular organelle;membrane;mitochondrion;nucleoplasm;nucleus;organelle		AKAP95	ACAWNRNSRCGG_UNKNOWN;BIOCARTA_AKAP95_PATHWAY;BYSTRYKH_HEMATOPOIESIS_STEM_CELL_AND_BRAIN_QTL_TRANS;CELL_CYCLE_GO_0007049;CELL_CYCLE_PHASE;CELL_CYCLE_PROCESS;chr19p13;DOUGLAS_BMI1_TARGETS_UP;GATTGGY_V$NFY_Q6_01;GCCATNTTG_V$YY1_Q6;GGGCGGR_V$SP1_Q6;GOLDRATH_HOMEOSTATIC_PROLIFERATION;GRAESSMANN_APOPTOSIS_BY_DOXORUBICIN_DN;GRAESSMANN_RESPONSE_TO_MC_AND_DOXORUBICIN_DN;GROSS_HYPOXIA_VIA_ELK3_AND_HIF1A_DN…	Completeproteome;DNA-binding;Metal-binding;Nucleus;Phosphoprotein;Polymorphism;Referenceproteome;Repeat;Zinc;Zinc-finger		Casein kinase I substrate motif;Casein kinase II substrate motif	+	CST;HTP	1	1.83909e-40	162.81	158.77	113.73	-0.85632	501260000	279480000	221780000	339	111.574
-0.212022	1.42885	2.05376	2.31487	1.7454	0.651071	1.38334	1.92839	1.60159	1.16969	2.79383	0.561491	1.32967	2.19075	2.08624	0.914857	1.86973	0.935105	0.769578	1.60159	1.32967	-0.271914	0.274722	S	2	___1	biological regulation;cell migration;cell motility;cell proliferation;cellular component movement;cellular component organization;cellular component organization or biogenesis;cellular process;locomotion;macromolecule metabolic process;metabolic process;neuromuscular junction development;positive regulation of biological process;positive regulation of catabolic process;positive regulation of cell…	binding;catalytic activity;cation binding;endopeptidase activity;epidermal growth factor binding;growth factor binding;hormone binding;hydrolase activity;ion binding;metal ion binding;metalloendopeptidase activity;metallopeptidase activity;peptidase activity;peptidase activity, acting on L-amino acid peptides;protein binding	cell part;cell surface;cytoplasmic part;cytosol;intracellular part	biological regulation;cell motility;cell proliferation;cellular component movement;cellular component organization;cellular process;locomotion;macromolecule metabolic process;metabolic process;primary metabolic process;protein metabolic process;proteolysis	cell part;cell surface;cytosol		Peptidase_M16;Peptidase_M16_C	ACEVEDO_LIVER_TUMOR_VS_NORMAL_ADJACENT_TISSUE_UP;ACTGCAG,MIR-17-3P;ANATOMICAL_STRUCTURE_DEVELOPMENT;BILD_CTNNB1_ONCOGENIC_SIGNATURE;CELL_DEVELOPMENT;CELL_MIGRATION;CELL_PROLIFERATION_GO_0008283;CELL_SURFACE;CHAUHAN_RESPONSE_TO_METHOXYESTRADIOL_DN;chr1p32;CYTOPLASM;CYTOPLASMIC_PART;CYTOSOL;EXTRACELLULAR_STRUCTURE_ORGANIZATION_AND_BIOGENESIS;GATTGGY_V$NFY_Q6_01;GGGCGGR_V$SP1_Q6;GROWTH_FACTOR_BINDIN…	Alternativesplicing;Completeproteome;Hydrolase;Metal-binding;Metalloprotease;Phosphoprotein;Polymorphism;Protease;Referenceproteome;Signal;Zinc		14-3-3 domain binding motif;Aurora-A kinase substrate motif;Calmodulin-dependent protein kinase II substrate motif;Casein kinase II substrate motif;G protein-coupled receptor kinase 1 substrate motif;PAK2 kinase substrate motif;Phosphorylase kinase substrate motif;PKA kinase substrate motif;PKC epsilon kinase substrate motif;PKC kinase substrate motif	+	CST;HTP	0.999177	3.1066e-17	133.95	122.03	125.23	-0.28702	4466800000	3750600000	716280000	94	30.8434
0.0475146	0.0566224	NaN	-0.79333	0.371794	-0.272455	0.0286151	NaN	0.168112	-0.28756	-0.236685	-0.651153	-0.321052	-0.394642	-0.836355	-0.76448	0.0312476	0.382079	0.160651	0.0475146	-0.321052	-0.368567	0.193368	S	2	___1	cellular macromolecule metabolic process;cellular metabolic process;cellular nitrogen compound metabolic process;cellular process;macromolecule metabolic process;metabolic process;mRNA metabolic process;mRNA processing;nitrogen compound metabolic process;nuclear mRNA splicing, via spliceosome;nucleic acid metabolic process;nucleobase-containing compound metabolic process;primary metabolic process…	adenyl nucleotide binding;adenyl ribonucleotide binding;ATP binding;ATPase activity;ATPase activity, coupled;ATP-dependent helicase activity;ATP-dependent RNA helicase activity;binding;catalytic activity;helicase activity;hydrolase activity;hydrolase activity, acting on acid anhydrides;hydrolase activity, acting on acid anhydrides, in phosphorus-containing anhydrides;nucleoside-triphosphatase act…	cell part;cytoplasm;intracellular membrane-bounded organelle;intracellular organelle;intracellular organelle part;intracellular part;macromolecular complex;membrane-bounded organelle;nuclear part;nucleoplasm;nucleus;organelle;organelle part;ribonucleoprotein complex;spliceosomal complex	cellular metabolic process;cellular nitrogen compound metabolic process;cellular process;macromolecule metabolic process;metabolic process;mRNA metabolic process;mRNA processing;nitrogen compound metabolic process;nucleobase-containing compound metabolic process;primary metabolic process;RNA metabolic process;RNA processing;RNA splicing	cell part;cytoplasm;intracellular membrane-bounded organelle;intracellular organelle;macromolecular complex;nucleoplasm;nucleus;organelle;ribonucleoprotein complex;spliceosomal complex	Spliceosome	DEAD;HA2;Helicase_C;OB_NTP_bind	ACEVEDO_LIVER_CANCER_UP;ACEVEDO_LIVER_TUMOR_VS_NORMAL_ADJACENT_TISSUE_UP;BANDRES_RESPONSE_TO_CARMUSTIN_MGMT_24HR_DN;BANDRES_RESPONSE_TO_CARMUSTIN_MGMT_48HR_DN;BIOPOLYMER_METABOLIC_PROCESS;chr6p21;GINESTIER_BREAST_CANCER_20Q13_AMPLIFICATION_DN;GSE11864_UNTREATED_VS_CSF1_IFNG_IN_MAC_DN;GSE12845_IGD_POS_VS_NEG_BLOOD_BCELL_UP;GSE13229_IMM_VS_INTMATURE_NKCELL_DN;GSE13306_RA_VS_UNTREATED_TREG_DN;GSE140…	ATP-binding;Completeproteome;Helicase;Hydrolase;mRNAprocessing;mRNAsplicing;Nucleotide-binding;Nucleus;Phosphoprotein;Polymorphism;Referenceproteome	CF IIAm complex (Cleavage factor IIAm complex);Spliceosome	b-Adrenergic Receptor kinase substrate motif;BARD1 BRCT domain binding motif;Casein kinase II substrate motif;G protein-coupled receptor kinase 1 substrate motif;PKA kinase substrate motif;PKC kinase substrate motif	+	HTP	1	4.42374e-15	124.69	118.26	124.69	-0.62632	297950000	177960000	119990000	160	67.2809
2.61434	NaN	1.32054	1.06513	1.71641	1.72309	2.64825	NaN	NaN	2.46932	NaN	1.89525	2.68707	2.64997	1.55234	NaN	1.10991	NaN	0.584396	1.71975	2.18229	0.462534	0.0833591	S	2	___1	biological regulation;catabolic process;cellular catabolic process;cellular macromolecule catabolic process;cellular macromolecule metabolic process;cellular metabolic process;cellular process;cellular protein catabolic process;cellular protein metabolic process;defense response;defense response to virus;immune effector process;immune system process;macromolecule catabolic process;macromolecule m…	binding;identical protein binding;lamin binding;protein binding;protein dimerization activity;protein heterodimerization activity;protein homodimerization activity	cell part;cytoplasmic part;endoplasmic reticulum;envelope;integral to membrane;intracellular membrane-bounded organelle;intracellular organelle;intracellular organelle part;intracellular part;intrinsic to membrane;membrane;membrane part;membrane-bounded organelle;mitochondrial membrane;mitochondrial outer membrane;mitochondrial part;mitochondrion;nuclear envelope;nuclear part;organelle;organelle …	biological regulation;catabolic process;cellular metabolic process;cellular process;immune system process;macromolecule metabolic process;metabolic process;multi-organism process;primary metabolic process;protein catabolic process;protein metabolic process;response to biotic stimulus;response to stimulus;response to stress;viral reproduction	cell part;endoplasmic reticulum;intracellular membrane-bounded organelle;intracellular organelle;membrane;mitochondrion;nuclear envelope;organelle		BNIP3	AATGTGA,MIR-23A,MIR-23B;AGGAAGC,MIR-516-3P;ALCALA_APOPTOSIS;ANTI_APOPTOSIS;APOPTOSIS_GO;BILBAN_B_CLL_LPL_UP;BLALOCK_ALZHEIMERS_DISEASE_DN;BONOME_OVARIAN_CANCER_SURVIVAL_SUBOPTIMAL_DEBULKING;BRACHAT_RESPONSE_TO_CAMPTOTHECIN_DN;BRACHAT_RESPONSE_TO_METHOTREXATE_DN;BROWNE_HCMV_INFECTION_24HR_DN;CACCAGC,MIR-138;CCTGTGA,MIR-513;CELL_DEVELOPMENT;CHEOK_RESPONSE_TO_HD_MTX_DN;chr8p21;CTTTGA_V$LEF1_Q2;CTTTG…	Alternativesplicing;Apoptosis;Completeproteome;Endoplasmicreticulum;Host-virusinteraction;Membrane;Mitochondrion;Mitochondrionoutermembrane;Nucleus;Phosphoprotein;Referenceproteome;Transmembrane;Transmembranehelix		Casein kinase II substrate motif;G protein-coupled receptor kinase 1 substrate motif;GSK3 kinase substrate motif;PKA kinase substrate motif;PKC kinase substrate motif	+	CST	0.987318	0.000297145	119.39	38.37	74.376	0.29786	102620000	88468000	14153000	124	18.9148
1.46832	0.578061	0.900469	1.14147	1.76895	2.32625	1.6762	1.29159	1.38479	1.66914	1.10969	1.58274	2.08016	1.24023	1.37208	0.712187	1.5339	0.960869	0.890433	1.38479	1.37208	-0.0127079	0.454826	S	2	___1	biological regulation;catabolic process;cellular catabolic process;cellular macromolecule catabolic process;cellular macromolecule metabolic process;cellular metabolic process;cellular process;cellular protein catabolic process;cellular protein metabolic process;defense response;defense response to virus;immune effector process;immune system process;macromolecule catabolic process;macromolecule m…	binding;identical protein binding;lamin binding;protein binding;protein dimerization activity;protein heterodimerization activity;protein homodimerization activity	cell part;cytoplasmic part;endoplasmic reticulum;envelope;integral to membrane;intracellular membrane-bounded organelle;intracellular organelle;intracellular organelle part;intracellular part;intrinsic to membrane;membrane;membrane part;membrane-bounded organelle;mitochondrial membrane;mitochondrial outer membrane;mitochondrial part;mitochondrion;nuclear envelope;nuclear part;organelle;organelle …	biological regulation;catabolic process;cellular metabolic process;cellular process;immune system process;macromolecule metabolic process;metabolic process;multi-organism process;primary metabolic process;protein catabolic process;protein metabolic process;response to biotic stimulus;response to stimulus;response to stress;viral reproduction	cell part;endoplasmic reticulum;intracellular membrane-bounded organelle;intracellular organelle;membrane;mitochondrion;nuclear envelope;organelle		BNIP3	AATGTGA,MIR-23A,MIR-23B;AGGAAGC,MIR-516-3P;ALCALA_APOPTOSIS;ANTI_APOPTOSIS;APOPTOSIS_GO;BILBAN_B_CLL_LPL_UP;BLALOCK_ALZHEIMERS_DISEASE_DN;BONOME_OVARIAN_CANCER_SURVIVAL_SUBOPTIMAL_DEBULKING;BRACHAT_RESPONSE_TO_CAMPTOTHECIN_DN;BRACHAT_RESPONSE_TO_METHOTREXATE_DN;BROWNE_HCMV_INFECTION_24HR_DN;CACCAGC,MIR-138;CCTGTGA,MIR-513;CELL_DEVELOPMENT;CHEOK_RESPONSE_TO_HD_MTX_DN;chr8p21;CTTTGA_V$LEF1_Q2;CTTTG…	Alternativesplicing;Apoptosis;Completeproteome;Endoplasmicreticulum;Host-virusinteraction;Membrane;Mitochondrion;Mitochondrionoutermembrane;Nucleus;Phosphoprotein;Referenceproteome;Transmembrane;Transmembranehelix		14-3-3 domain binding motif;Calmodulin-dependent protein kinase II substrate motif;Casein kinase II substrate motif;Phosphorylase kinase substrate motif;PKA kinase substrate motif;PKC kinase substrate motif	+	CST;HTP	0.999906	8.05738e-06	104.2	27.976	104.2	-0.44895	201810000	165720000	36093000	126	40.7787
1.60854	-0.168837	0.34001	-0.0242666	0.650901	0.932936	1.13791	-0.136593	0.835645	0.321094	0.38487	0.304338	0.406185	0.47082	-0.265418	-0.187674	-0.0881604	1.15027	0.25486	0.650901	0.321094	-0.329807	0.224077	S	2	___1	androgen receptor signaling pathway;biological regulation;biosynthetic process;cellular biosynthetic process;cellular macromolecule metabolic process;cellular metabolic process;cellular nitrogen compound metabolic process;cellular process;cellular response to stimulus;developmental process;gene expression;intracellular receptor mediated signaling pathway;macromolecule metabolic process;metabolic …	binding;hormone receptor binding;ligand-dependent nuclear receptor transcription coactivator activity;nuclear hormone receptor binding;protein binding;protein binding transcription factor activity;receptor activity;receptor binding;RNA polymerase II transcription cofactor activity;RNA polymerase II transcription factor binding transcription factor activity;thyroid hormone receptor binding;transcr…	cell part;intracellular membrane-bounded organelle;intracellular organelle;intracellular organelle part;intracellular part;macromolecular complex;mediator complex;membrane;membrane-bounded organelle;nuclear part;nucleoplasm;nucleoplasm part;nucleus;organelle;organelle part;protein complex	biological regulation;biosynthetic process;cellular metabolic process;cellular nitrogen compound metabolic process;cellular process;developmental process;macromolecule metabolic process;metabolic process;nitrogen compound metabolic process;nucleobase-containing compound metabolic process;primary metabolic process;response to stimulus;RNA metabolic process;signal transduction;transcription initiat…	cell part;intracellular membrane-bounded organelle;intracellular organelle;macromolecular complex;membrane;nucleoplasm;nucleus;organelle;protein complex		Med14	AAGCAAT,MIR-137;ACAWNRNSRCGG_UNKNOWN;ACTGTGA,MIR-27A,MIR-27B;ACTTTAT,MIR-142-5P;AMUNDSON_RESPONSE_TO_ARSENITE;ANDROGEN_RECEPTOR_SIGNALING_PATHWAY;ATACTGT,MIR-144;BENPORATH_ES_1;BIDUS_METASTASIS_UP;BIOPOLYMER_METABOLIC_PROCESS;BLUM_RESPONSE_TO_SALIRASIB_DN;CATTTCA,MIR-203;CELLULAR_COMPONENT_ASSEMBLY;chrxp11;CTTGTAT,MIR-381;DNA_DIRECTED_RNA_POLYMERASEII_HOLOENZYME;GAZDA_DIAMOND_BLACKFAN_ANEMIA_ERYT…	Activator;Completeproteome;Directproteinsequencing;Nucleus;Phosphoprotein;Polymorphism;Referenceproteome;Repeat;Transcription;Transcriptionregulation	ARC complex;ARC92-Mediator complex;ARC-L complex;BRD4 complex;CRSP complex;CRSP-Mediator 2 complex;DRIP complex;Mediator complex;Mediator complex 1;Mediator complex 2;NAT complex;PC2 complex;SMCC complex;TFTC-type histone acetyl transferase complex;TRAP complex	14-3-3 domain binding motif;Calmodulin-dependent protein kinase II substrate motif;Pim1 kinase substrate sequence;PKA kinase substrate motif;PKA, PKG kinase substrate motif;PKC epsilon kinase substrate motif;PKC kinase substrate motif;PKG kinase substrate motif	+	CST;HTP	1	2.04242e-10	127.91	119.6	127.91	0.74361	342870000	245280000	97581000	617	113.964
NaN	NaN	NaN	-2.23007	-0.779276	-0.406636	-0.933247	NaN	-0.052337	-1.61212	-1.59468	-1.54209	NaN	-2.03212	-1.65031	-1.44235	NaN	NaN	0.107584	-0.779276	-1.6034	-0.824125	0.0168421	S	2	___1	ATP-dependent chromatin remodeling;biological regulation;biosynthetic process;cellular biosynthetic process;cellular component assembly;cellular component assembly at cellular level;cellular component organization;cellular component organization at cellular level;cellular component organization or biogenesis;cellular component organization or biogenesis at cellular level;cellular macromolecular c…	adenyl nucleotide binding;adenyl ribonucleotide binding;ATP binding;ATPase activity;binding;catalytic activity;chromatin binding;DNA binding;helicase activity;hydrolase activity;hydrolase activity, acting on acid anhydrides;hydrolase activity, acting on acid anhydrides, in phosphorus-containing anhydrides;nucleic acid binding;nucleoside-triphosphatase activity;nucleotide binding;purine nucleotide…	cell part;chromatin remodeling complex;chromatin silencing complex;chromosome;condensed chromosome;intracellular membrane-bounded organelle;intracellular non-membrane-bounded organelle;intracellular organelle;intracellular organelle part;intracellular part;ISWI complex;macromolecular complex;membrane-bounded organelle;non-membrane-bounded organelle;nuclear part;nucleolus;nucleoplasm;nucleus;NURF …	biological regulation;biosynthetic process;cellular component assembly;cellular component organization;cellular macromolecular complex assembly;cellular metabolic process;cellular nitrogen compound metabolic process;cellular process;chromatin modification;chromatin organization;chromosome organization;DNA metabolic process;DNA repair;gene silencing;macromolecular complex assembly;macromolecule me…	cell part;chromatin remodeling complex;chromosome;intracellular membrane-bounded organelle;intracellular non-membrane-bounded organelle;intracellular organelle;macromolecular complex;nucleolus;nucleoplasm;nucleus;organelle;protein complex		DBINO;HAND;Helicase_C;SLIDE;SNF2_N	ADENYL_NUCLEOTIDE_BINDING;ADENYL_RIBONUCLEOTIDE_BINDING;ATP_BINDING;ATPASE_ACTIVITY;BARIS_THYROID_CANCER_DN;BIOPOLYMER_METABOLIC_PROCESS;CAGCTG_V$AP4_Q5;CATTGTYY_V$SOX9_B1;CELLULAR_COMPONENT_ASSEMBLY;CGTSACG_V$PAX3_B;chr4q31;CHROMATIN_ASSEMBLY;CHROMATIN_ASSEMBLY_OR_DISASSEMBLY;CHROMATIN_REMODELING_COMPLEX;CHROMOSOME;CHROMOSOME_ORGANIZATION_AND_BIOGENESIS;CONDENSED_CHROMOSOME;DACOSTA_UV_RESPONSE_V…	Acetylation;ATP-binding;Chromatinregulator;Completeproteome;Helicase;Hydrolase;Nucleotide-binding;Nucleus;Phosphoprotein;Referenceproteome;Repeat	ALL-1 supercomplex;ATP-utilizing chromatin assembly and remodeling factor (hACF) complex;CEN complex;DNMT3B complex;HuCHRAC complex;Nucleolar remodeling complex (NoRC complex);Polycomb repressive complex 1 (PRC1, hPRC-H);Remodeling and spacing factor (RSF) complex;SNF2h-cohesin-NuRD complex;SNF2h-HDAC12 complex;WCRF complex;WICH complex	Cdc2 kinase substrate motif;CDK kinase substrate motif;CDK1,2,4,6 kinase substrate motif;ERK1,2 kinase substrate motif;Growth associated histone HI kinase substrate motif;GSK-3, ERK1, ERK2, CDK5 substrate motif;PKA kinase substrate motif;WW domain binding motif	+	CST;HTP	0.985416	5.54512e-54	156.8	156.8	61.593	0.27141	1215200000	517290000	697900000	116	18.3214
1.08505	0.483876	0.35792	0.185141	1.38031	0.502232	NaN	0.144005	0.790211	0.367763	0.350413	0.511326	0.631582	0.682957	0.780859	NaN	0.581869	0.811107	0.877507	0.493054	0.606725	0.113671	0.325983	S	2	___1	cellular macromolecule metabolic process;cellular metabolic process;cellular nitrogen compound metabolic process;cellular process;macromolecule metabolic process;metabolic process;nitrogen compound metabolic process;nucleic acid metabolic process;nucleobase-containing compound metabolic process;primary metabolic process;RNA metabolic process;RNA processing	binding;cation binding;ion binding;metal ion binding	cell part;extracellular region part;extracellular space;intracellular	cellular metabolic process;cellular nitrogen compound metabolic process;cellular process;macromolecule metabolic process;metabolic process;nitrogen compound metabolic process;nucleobase-containing compound metabolic process;primary metabolic process;RNA metabolic process;RNA processing	cell part;extracellular space;intracellular		zf-C3H1	AAAGGGA,MIR-204,MIR-211;AAGCAAT,MIR-137;ACACTGG,MIR-199A,MIR-199B;AGTCAGC,MIR-345;ATAACCT,MIR-154;ATGTACA,MIR-493;CATTTCA,MIR-203;chr12q21;CROMER_METASTASIS_UP;DAZARD_RESPONSE_TO_UV_NHEK_DN;DEBIASI_APOPTOSIS_BY_REOVIRUS_INFECTION_DN;FLECHNER_PBL_KIDNEY_TRANSPLANT_REJECTED_VS_OK_UP;GACTGTT,MIR-212,MIR-132;GAGACTG,MIR-452;GGCAGAC,MIR-346;GSE10094_LCMV_VS_LISTERIA_IND_EFF_CD4_TCELL_UP;GSE11924_TH1_V…	Acetylation;Alternativesplicing;Coiledcoil;Completeproteome;Metal-binding;Phosphoprotein;Polymorphism;Referenceproteome;Repeat;TPRrepeat;Zinc;Zinc-finger		14-3-3 domain binding motif;AMP-activated protein kinase substrate motif;Calmodulin-dependent protein kinase I substrate motif;Calmodulin-dependent protein kinase II substrate motif;Calmodulin-dependent protein kinase IV substrate motif;Casein kinase II substrate motif;Chk1 kinase substrate motif;PAK2 kinase substrate motif;PKA kinase substrate motif;PKC epsilon kinase substrate motif;PKC kinase …	+	CST;HTP	0.987825	4.50017e-27	177.62	142.6	138.01	0.44978	270150000	201610000	68536000	352	22.1025
NaN	0.923063	1.96525	2.14829	-0.534992	NaN	0.360506	2.16059	-0.861104	-0.0754598	1.41893	1.86875	0.512694	1.09256	1.70952	1.34729	1.3187	0.0147602	0.796042	0.923063	1.3187	0.395638	0.114266	S	2	___1		adenyl nucleotide binding;adenyl ribonucleotide binding;ATP binding;binding;catalytic activity;cation binding;ion binding;kinase activity;magnesium ion binding;metal ion binding;nucleotide binding;phosphotransferase activity, alcohol group as acceptor;protein kinase activity;protein serine/threonine kinase activity;purine nucleotide binding;purine ribonucleoside triphosphate binding;purine ribonu…					DUF1908;PDZ;Pkinase	BONOME_OVARIAN_CANCER_SURVIVAL_SUBOPTIMAL_DEBULKING;chr19p13;ESC_V6.5_UP_EARLY.V1_UP;GSE11924_TFH_VS_TH17_CD4_TCELL_UP;GSE13493_DP_VS_CD4INTCD8POS_THYMOCYTE_UP;GSE13493_DP_VS_CD8POS_THYMOCYTE_UP;GSE1432_CTRL_VS_IFNG_6H_MICROGLIA_UP;GSE15659_TREG_VS_TCONV_UP;GSE17721_0.5H_VS_4H_CPG_BMDM_UP;GSE17721_0.5H_VS_8H_CPG_BMDM_UP;GSE17721_12H_VS_24H_LPS_BMDM_DN;GSE17721_LPS_VS_PAM3CSK4_16H_BMDM_DN;GSE17721…	3D-structure;ATP-binding;Completeproteome;Kinase;Magnesium;Nucleotide-binding;Phosphoprotein;Polymorphism;Referenceproteome;Serine/threonine-proteinkinase;Transferase		14-3-3 domain binding motif;Calmodulin-dependent protein kinase II substrate motif;Calmodulin-dependent protein kinase IV substrate motif;PAK2 kinase substrate motif;PKA kinase substrate motif;PKC epsilon kinase substrate motif;PKC kinase substrate motif	+	HTP	1	0.00362189	103.01	44.05	84.054	-0.53378	79927000	64724000	15203000	747	84.0541
NaN	-0.93145	1.03614	0.413737	-1.43011	NaN	NaN	0.525292	NaN	NaN	NaN	-0.310399	-1.56691	NaN	0.311745	-0.687623	0.048566	NaN	0.545085	0.413737	-0.310399	-0.724136	0.0323261	S	3	___1		adenyl nucleotide binding;adenyl ribonucleotide binding;ATP binding;binding;catalytic activity;cation binding;ion binding;kinase activity;magnesium ion binding;metal ion binding;nucleotide binding;phosphotransferase activity, alcohol group as acceptor;protein kinase activity;protein serine/threonine kinase activity;purine nucleotide binding;purine ribonucleoside triphosphate binding;purine ribonu…					DUF1908;PDZ;Pkinase	BONOME_OVARIAN_CANCER_SURVIVAL_SUBOPTIMAL_DEBULKING;chr19p13;ESC_V6.5_UP_EARLY.V1_UP;GSE11924_TFH_VS_TH17_CD4_TCELL_UP;GSE13493_DP_VS_CD4INTCD8POS_THYMOCYTE_UP;GSE13493_DP_VS_CD8POS_THYMOCYTE_UP;GSE1432_CTRL_VS_IFNG_6H_MICROGLIA_UP;GSE15659_TREG_VS_TCONV_UP;GSE17721_0.5H_VS_4H_CPG_BMDM_UP;GSE17721_0.5H_VS_8H_CPG_BMDM_UP;GSE17721_12H_VS_24H_LPS_BMDM_DN;GSE17721_LPS_VS_PAM3CSK4_16H_BMDM_DN;GSE17721…	3D-structure;ATP-binding;Completeproteome;Kinase;Magnesium;Nucleotide-binding;Phosphoprotein;Polymorphism;Referenceproteome;Serine/threonine-proteinkinase;Transferase		14-3-3 domain binding motif;Calmodulin-dependent protein kinase II substrate motif;CLK1 kinase substrate motif;G protein-coupled receptor kinase 1 substrate motif;PKA kinase substrate motif;PKC kinase substrate motif	+	HTP	0.995826	0.000180146	67.646	62.591	48.899	-0.25466	53429000	33683000	19746000	728	23.7766
-0.676924	0.308972	-0.128116	0.167804	-0.364911	0.383966	-0.663728	NaN	NaN	0.048575	NaN	0.505591	-0.169451	-0.126863	0.228457	-0.135528	NaN	0.257077	0.271271	-0.128116	0.048575	0.176691	0.267842	S	2	___1	ameboidal cell migration;anatomical structure development;anatomical structure formation involved in morphogenesis;anterior/posterior pattern specification;biological regulation;biosynthetic process;cell migration;cell motility;cell proliferation;cell proliferation in forebrain;cellular biosynthetic process;cellular component movement;cellular macromolecule biosynthetic process;cellular macromole…	binding;cation binding;DNA binding;enzyme regulator activity;ion binding;metal ion binding;nucleic acid binding;phosphatase regulator activity	cell part;intracellular membrane-bounded organelle;intracellular organelle;intracellular part;membrane-bounded organelle;nucleus;organelle	anatomical structure development;anatomical structure formation involved in morphogenesis;biological regulation;biosynthetic process;cell motility;cell proliferation;cellular component movement;cellular metabolic process;cellular nitrogen compound metabolic process;cellular process;developmental process;locomotion;macromolecule metabolic process;metabolic process;nitrogen compound metabolic proce…	cell part;intracellular membrane-bounded organelle;intracellular organelle;nucleus;organelle		zf-Di19	AACTTT_UNKNOWN;AAGCACA,MIR-218;ACTGAAA,MIR-30A-3P,MIR-30E-3P;ACTGTAG,MIR-139;AGCYRWTTC_UNKNOWN;AGGAAGC,MIR-516-3P;AGTCTTA,MIR-499;ATACTGT,MIR-144;ATGCACG,MIR-517B;ATGTAGC,MIR-221,MIR-222;BENPORATH_EED_TARGETS;BENPORATH_ES_WITH_H3K27ME3;BENPORATH_NANOG_TARGETS;BENPORATH_NOS_TARGETS;BENPORATH_OCT4_TARGETS;BENPORATH_PRC2_TARGETS;BENPORATH_SOX2_TARGETS;BENPORATH_SUZ12_TARGETS;BMI1_DN_MEL18_DN.V1_UP;B…	3D-structure;Acetylation;Alternativesplicing;Completeproteome;Diseasemutation;DNA-binding;Epilepsy;Hirschsprungdisease;Homeobox;Isopeptidebond;Mentalretardation;Metal-binding;Nucleus;Polymorphism;Referenceproteome;Repeat;Repressor;Transcription;Transcriptionregulation;Ublconjugation;Zinc;Zinc-finger	CtBP complex	Casein kinase II substrate motif;ERK1,2 kinase substrate motif;Growth associated histone HI kinase substrate motif;GSK-3, ERK1, ERK2, CDK5 substrate motif;MAPKAPK2 kinase substrate motif;WW domain binding motif	+	HTP	0.98376	0.00214167	52.716	16.129	42.599	-0.14404	102350000	64742000	37605000	681	17.823
NaN	2.08638	NaN	2.17121	1.69887	NaN	NaN	1.93855	2.74109	1.71603	2.60716	2.09739	2.35314	3.28844	NaN	NaN	2.11721	NaN	0.422706	2.08638	2.23518	0.148794	0.292931	S	2	___1	biological regulation;biosynthetic process;cell cycle arrest;cell cycle process;cell surface receptor linked signaling pathway;cellular biosynthetic process;cellular macromolecule biosynthetic process;cellular macromolecule metabolic process;cellular metabolic process;cellular nitrogen compound metabolic process;cellular process;cellular response to stimulus;macromolecule biosynthetic process;mac…	binding;DNA binding;nucleic acid binding;RNA binding	cell part;intracellular organelle part;intracellular part;nuclear part;nucleoplasm;organelle part	biological regulation;biosynthetic process;cellular metabolic process;cellular nitrogen compound metabolic process;cellular process;macromolecule metabolic process;metabolic process;nitrogen compound metabolic process;nucleobase-containing compound metabolic process;primary metabolic process;regulation of cell cycle;regulation of transport;response to stimulus;RNA metabolic process;signal transdu…	cell part;nucleoplasm		AXH;HMG_box	AACTTT_UNKNOWN;ACCATTT,MIR-522;ACEVEDO_LIVER_CANCER_UP;ACTAYRNNNCCCR_UNKNOWN;AGCATTA,MIR-155;BENPORATH_NANOG_TARGETS;BENPORATH_SOX2_TARGETS;BHAT_ESR1_TARGETS_NOT_VIA_AKT1_DN;BHAT_ESR1_TARGETS_VIA_AKT1_DN;BLALOCK_ALZHEIMERS_DISEASE_UP;BUYTAERT_PHOTODYNAMIC_THERAPY_STRESS_UP;CACGTG_V$MYC_Q2;chr7q22;CSR_EARLY_UP.V1_DN;CTTGTAT,MIR-381;CTTTAAR_UNKNOWN;CTTTGA_V$LEF1_Q2;CTTTGCA,MIR-527;DANG_BOUND_BY_MYC…	3D-structure;Alternativesplicing;Completeproteome;DNA-binding;Nucleus;Referenceproteome;Repressor;Transcription;Transcriptionregulation;Wntsignalingpathway		14-3-3 domain binding motif;Akt kinase substrate motif;Aurora-A kinase substrate motif;Calmodulin-dependent protein kinase II substrate motif;Casein kinase II substrate motif;DMPK1 kinase substrate motif;MAPKAPK1 kinase substrate motif;p70 Ribosomal S6 kinase substrate motif;PAK2 kinase substrate motif;Phosphorylase kinase substrate motif;PKA kinase substrate motif;PKC epsilon kinase substrate mo…	+	CST;HTP	0.963329	0.000145008	71.434	63.759	50.858	-0.28471	43302000	38049000	5252500	380	14.1945
1.63836	2.01662	NaN	1.08416	-0.240825	-0.415054	-0.337927	NaN	1.39082	0.605299	NaN	0.328552	2.72285	2.36925	1.23676	NaN	NaN	1.42593	0.220837	1.08416	1.33135	0.247189	0.209646	S	2	___1	cellular component organization;cellular component organization or biogenesis;cellular membrane organization;cellular process;defense response;endocytosis;establishment of localization;immune response;immune system process;inflammatory response;membrane invagination;membrane organization;response to stimulus;response to stress;response to wounding;transport;vesicle-mediated transport	binding;carbohydrate binding;receptor activity	cell part;extracellular membrane-bounded organelle;extracellular organelle;extracellular region part;extracellular vesicular exosome;integral to membrane;integral to plasma membrane;intrinsic to membrane;intrinsic to plasma membrane;membrane part;membrane-bounded organelle;membrane-bounded vesicle;organelle;plasma membrane part;vesicle	cellular component organization;cellular membrane organization;cellular process;endocytosis;establishment of localization;immune system process;membrane invagination;membrane organization;response to stimulus;response to stress;transport;vesicle-mediated transport	cell part;extracellular organelle;organelle;vesicle		fn2;Lectin_C	BERENJENO_TRANSFORMED_BY_RHOA_REVERSIBLY_DN;BERENJENO_TRANSFORMED_BY_RHOA_UP;CASORELLI_ACUTE_PROMYELOCYTIC_LEUKEMIA_UP;chr2q24;CREIGHTON_ENDOCRINE_THERAPY_RESISTANCE_3;DEFENSE_RESPONSE;FLECHNER_BIOPSY_KIDNEY_TRANSPLANT_OK_VS_DONOR_UP;GATTGGY_V$NFY_Q6_01;GOTZMANN_EPITHELIAL_TO_MESENCHYMAL_TRANSITION_UP;GRAESSMANN_APOPTOSIS_BY_SERUM_DEPRIVATION_UP;GRAESSMANN_RESPONSE_TO_MC_AND_SERUM_DEPRIVATION_UP;…	Alternativesplicing;Completeproteome;Directproteinsequencing;Disulfidebond;Endocytosis;Glycoprotein;Lectin;Membrane;Phosphoprotein;Polymorphism;Receptor;Referenceproteome;Repeat;Signal;Transmembrane;Transmembranehelix					0.851841	2.88808e-07	123.95	104.16	115.92	0.44531	198000000	149730000	48268000	1702	7.59629
1.41819	0.0688632	1.87222	0.595984	NaN	NaN	NaN	NaN	1.31685	1.27125	0.725743	1.20014	1.9713	NaN	1.29444	0.280282	2.2067	NaN	0.596328	1.31685	1.27125	-0.0456088	0.489787	S	2	___1	anatomical structure morphogenesis;cell part morphogenesis;cell projection morphogenesis;cell projection organization;cellular component assembly;cellular component morphogenesis;cellular component organization;cellular component organization at cellular level;cellular component organization or biogenesis;cellular component organization or biogenesis at cellular level;cellular developmental proce…	binding;epidermal growth factor receptor binding;growth factor receptor binding;insulin receptor binding;lipid binding;phosphatidylinositol binding;phospholipid binding;protein binding;protein complex binding;receptor binding	cell part;cell projection;cytoplasm;cytoplasmic part;early endosome membrane;endosomal part;endosome membrane;extracellular membrane-bounded organelle;extracellular organelle;extracellular region part;extracellular vesicular exosome;extrinsic to membrane;intracellular membrane-bounded organelle;intracellular organelle;intracellular organelle part;intracellular part;lamellipodium;macromolecular co…	anatomical structure morphogenesis;cellular component assembly;cellular component morphogenesis;cellular component organization;cellular membrane organization;cellular process;developmental process;endocytosis;endosome transport;establishment of localization;Golgi vesicle transport;macromolecular complex assembly;membrane invagination;membrane organization;organelle organization;protein complex a…	cell part;cell projection;cytoplasm;extracellular organelle;intracellular membrane-bounded organelle;intracellular organelle;macromolecular complex;membrane;organelle;protein complex;retromer complex;vesicle		PX;Sorting_nexin;Vps5	AAACCAC,MIR-140;ACATTCC,MIR-1,MIR-206;ACEVEDO_LIVER_CANCER_UP;ATTACAT,MIR-380-3P;BONOME_OVARIAN_CANCER_SURVIVAL_SUBOPTIMAL_DEBULKING;CACGTG_V$MYC_Q2;CHEOK_RESPONSE_TO_MERCAPTOPURINE_UP;CHIANG_LIVER_CANCER_SUBCLASS_UNANNOTATED_DN;chr5q23;CYTOPLASM;DACOSTA_UV_RESPONSE_VIA_ERCC3_DN;ESTABLISHMENT_OF_LOCALIZATION;FLECHNER_BIOPSY_KIDNEY_TRANSPLANT_OK_VS_DONOR_UP;FLECHNER_BIOPSY_KIDNEY_TRANSPLANT_REJECT…	Acetylation;Alternativesplicing;Cellprojection;Completeproteome;Endosome;Lipid-binding;Membrane;Phosphoprotein;Proteintransport;Referenceproteome;Transport	Retromer complex (SNX1, SNX2, VPS35, VPS29, VPS26A);Retromer complex (SNX1, SNX2, VPS35, VPS29, VPS26B);SNX complex (SNX1,1a,2,4, PDGF receptor);SNX complex (SNX1a, SNX2, SNX4);SNX complex (SNX1a, SNX2, SNX4, EGFR);SNX complex (SNX1a, SNX2, SNX4, INSR);SNX complex (SNX1a, SNX2, SNX4, LEPR);SNX complex (SNX1a, SNX2, SNX4, TFRC);SNX complex (SNX2), oligomeric	MAPKAPK2 kinase substrate motif;PKA kinase substrate motif;PKC kinase substrate motif	+	CST;HTP	0.996572	2.09069e-05	117.03	98.694	82.069	-0.12676	45044000	37341000	7703200	119	24.6345
-1.0647	-0.527104	0.224406	NaN	NaN	-1.28113	-0.321751	-0.373281	-0.873697	NaN	NaN	-0.013247	NaN	-0.0125956	-0.49067	-0.706188	-1.44328	NaN	0.837961	-0.527104	-0.49067	0.0364339	0.403331	S	3	___1	alcohol metabolic process;biosynthetic process;carbohydrate biosynthetic process;carbohydrate metabolic process;cellular biosynthetic process;cellular carbohydrate metabolic process;cellular lipid metabolic process;cellular macromolecule metabolic process;cellular metabolic process;cellular nitrogen compound metabolic process;cellular process;cellular protein metabolic process;C-terminal protein …	alcohol binding;binding;carbohydrate binding;catalytic activity;dolichyl-phosphate beta-D-mannosyltransferase activity;dolichyl-phosphate-mannose-protein mannosyltransferase activity;mannose binding;mannosyltransferase activity;monosaccharide binding;sugar binding;transferase activity;transferase activity, transferring glycosyl groups;transferase activity, transferring hexosyl groups	cell part;cytoplasmic part;dolichol-phosphate-mannose synthase complex;endoplasmic reticulum;endoplasmic reticulum membrane;endoplasmic reticulum part;intracellular membrane-bounded organelle;intracellular organelle;intracellular organelle part;intracellular part;macromolecular complex;mannosyltransferase complex;membrane;membrane part;membrane-bounded organelle;nucleus;organelle;organelle membra…	alcohol metabolic process;biosynthetic process;carbohydrate metabolic process;cellular lipid metabolic process;cellular metabolic process;cellular nitrogen compound metabolic process;cellular process;lipid metabolic process;macromolecule metabolic process;macromolecule modification;metabolic process;nitrogen compound metabolic process;nucleobase-containing compound metabolic process;nucleotide-su…	cell part;endoplasmic reticulum;intracellular membrane-bounded organelle;intracellular organelle;macromolecular complex;mannosyltransferase complex;membrane;nucleus;organelle;protein complex	N-Glycan biosynthesis	Glycos_transf_2	ACEVEDO_LIVER_CANCER_UP;BENPORATH_MYC_MAX_TARGETS;BENPORATH_NANOG_TARGETS;BIOPOLYMER_METABOLIC_PROCESS;BIOPOLYMER_MODIFICATION;BIOSYNTHETIC_PROCESS;BOCHKIS_FOXA2_TARGETS;BROCKE_APOPTOSIS_REVERSED_BY_IL6;BRUINS_UVC_RESPONSE_LATE;CELLULAR_LIPID_METABOLIC_PROCESS;CELLULAR_MACROMOLECULE_METABOLIC_PROCESS;CELLULAR_PROTEIN_METABOLIC_PROCESS;CHIANG_LIVER_CANCER_SUBCLASS_UNANNOTATED_DN;chr20q13;CYTOPLASM…	Acetylation;Completeproteome;Congenitaldisorderofglycosylation;Congenitalmusculardystrophy;Diseasemutation;Dystroglycanopathy;Endoplasmicreticulum;Glycosyltransferase;Phosphoprotein;Referenceproteome;Transferase	Dolichol-phosphate mannose (DPM) synthase	Casein kinase II substrate motif;MAPKAPK2 kinase substrate motif	+	HTP	0.839508	3.71179e-22	171.99	156.45	109.83	-0.49229	365630000	200350000	165280000	7	7.18572
NaN	-0.437181	0.0284066	-0.607656	-0.378729	-1.13039	-0.188779	-0.192211	-0.720431	0.0614156	-1.31567	0.153989	0.403913	0.0832189	-0.344694	-0.820801	-1.23413	0.202354	0.586421	-0.407955	0.0614156	0.46937	0.080594	S	2	___1	alcohol metabolic process;biosynthetic process;carbohydrate biosynthetic process;carbohydrate metabolic process;cellular biosynthetic process;cellular carbohydrate metabolic process;cellular lipid metabolic process;cellular macromolecule metabolic process;cellular metabolic process;cellular nitrogen compound metabolic process;cellular process;cellular protein metabolic process;C-terminal protein …	alcohol binding;binding;carbohydrate binding;catalytic activity;dolichyl-phosphate beta-D-mannosyltransferase activity;dolichyl-phosphate-mannose-protein mannosyltransferase activity;mannose binding;mannosyltransferase activity;monosaccharide binding;sugar binding;transferase activity;transferase activity, transferring glycosyl groups;transferase activity, transferring hexosyl groups	cell part;cytoplasmic part;dolichol-phosphate-mannose synthase complex;endoplasmic reticulum;endoplasmic reticulum membrane;endoplasmic reticulum part;intracellular membrane-bounded organelle;intracellular organelle;intracellular organelle part;intracellular part;macromolecular complex;mannosyltransferase complex;membrane;membrane part;membrane-bounded organelle;nucleus;organelle;organelle membra…	alcohol metabolic process;biosynthetic process;carbohydrate metabolic process;cellular lipid metabolic process;cellular metabolic process;cellular nitrogen compound metabolic process;cellular process;lipid metabolic process;macromolecule metabolic process;macromolecule modification;metabolic process;nitrogen compound metabolic process;nucleobase-containing compound metabolic process;nucleotide-su…	cell part;endoplasmic reticulum;intracellular membrane-bounded organelle;intracellular organelle;macromolecular complex;mannosyltransferase complex;membrane;nucleus;organelle;protein complex	N-Glycan biosynthesis	Glycos_transf_2	ACEVEDO_LIVER_CANCER_UP;BENPORATH_MYC_MAX_TARGETS;BENPORATH_NANOG_TARGETS;BIOPOLYMER_METABOLIC_PROCESS;BIOPOLYMER_MODIFICATION;BIOSYNTHETIC_PROCESS;BOCHKIS_FOXA2_TARGETS;BROCKE_APOPTOSIS_REVERSED_BY_IL6;BRUINS_UVC_RESPONSE_LATE;CELLULAR_LIPID_METABOLIC_PROCESS;CELLULAR_MACROMOLECULE_METABOLIC_PROCESS;CELLULAR_PROTEIN_METABOLIC_PROCESS;CHIANG_LIVER_CANCER_SUBCLASS_UNANNOTATED_DN;chr20q13;CYTOPLASM…	Acetylation;Completeproteome;Congenitaldisorderofglycosylation;Congenitalmusculardystrophy;Diseasemutation;Dystroglycanopathy;Endoplasmicreticulum;Glycosyltransferase;Phosphoprotein;Referenceproteome;Transferase	Dolichol-phosphate mannose (DPM) synthase	Cdc2 kinase substrate motif;CDK kinase substrate motif;CDK1,2,4,6 kinase substrate motif;ERK1,2 kinase substrate motif;G protein-coupled receptor kinase 1 substrate motif;Growth associated histone HI kinase substrate motif;GSK3 kinase substrate motif;GSK-3, ERK1, ERK2, CDK5 substrate motif;PKA kinase substrate motif;PKC kinase substrate motif;WW domain binding motif	+	HTP	0.999981	1.77007e-51	226.54	205.8	226.54	0.52766	2986500000	1882200000	1104300000	9	47.1127
-0.721235	-1.46868	-1.70329	NaN	NaN	-0.996326	-1.32203	NaN	-0.223819	NaN	NaN	-1.39634	-1.06166	-1.18534	NaN	-1.64519	NaN	-0.274279	0.903454	-1.15918	-1.18534	-0.0261627	0.469096	S	2	___1	anatomical structure development;antibacterial humoral response;antimicrobial humoral response;cellular component assembly;cellular component assembly at cellular level;cellular component organization;cellular component organization at cellular level;cellular component organization or biogenesis;cellular component organization or biogenesis at cellular level;cellular macromolecular complex assemb…	binding;DNA binding;nucleic acid binding	cell part;chromosomal part;extracellular membrane-bounded organelle;extracellular organelle;extracellular region part;extracellular space;extracellular vesicular exosome;intracellular membrane-bounded organelle;intracellular organelle;intracellular organelle part;intracellular part;macromolecular complex;membrane-bounded organelle;membrane-bounded vesicle;nuclear chromosome part;nuclear nucleosom…	anatomical structure development;cellular component assembly;cellular component organization;cellular macromolecular complex assembly;cellular process;chromatin organization;chromosome organization;developmental process;immune system process;macromolecular complex assembly;multi-organism process;organelle organization;response to biotic stimulus;response to stimulus;response to stress	cell part;extracellular organelle;extracellular space;intracellular membrane-bounded organelle;intracellular organelle;macromolecular complex;nucleoplasm;nucleosome;nucleus;organelle;vesicle	Systemic lupus erythematosus	Histone	ACEVEDO_LIVER_CANCER_UP;ACEVEDO_LIVER_CANCER_WITH_H3K27ME3_DN;ACEVEDO_LIVER_CANCER_WITH_H3K9ME3_DN;ACEVEDO_LIVER_TUMOR_VS_NORMAL_ADJACENT_TISSUE_UP;AFFAR_YY1_TARGETS_UP;AKT_UP.V1_UP;ALCALAY_AML_BY_NPM1_LOCALIZATION_UP;AMUNDSON_RESPONSE_TO_ARSENITE;BAE_BRCA1_TARGETS_UP;BENPORATH_CYCLING_GENES;BENPORATH_EED_TARGETS;BENPORATH_MYC_MAX_TARGETS;BENPORATH_NANOG_TARGETS;BLALOCK_ALZHEIMERS_DISEASE_UP;BONO…	3D-structure;Acetylation;Alternativesplicing;Antibiotic;Antimicrobial;Chromosome;Completeproteome;Directproteinsequencing;DNA-binding;Glycoprotein;Isopeptidebond;Methylation;Nucleosomecore;Nucleus;Phosphoprotein;Polymorphism;Referenceproteome;Ublconjugation	H2AX complex II;Nop56p-associated pre-rRNA complex	14-3-3 domain binding motif;Akt kinase substrate motif;b-Adrenergic Receptor kinase substrate motif;Calmodulin-dependent protein kinase II substrate motif;Casein kinase II substrate motif;MAPKAPK1 kinase substrate motif;MAPKAPK2 kinase substrate motif;PKA kinase substrate motif;PKC epsilon kinase substrate motif;PKC kinase substrate motif	+	CST;HTP;LTP	0.999074	1.59902e-05	114.21	95.677	114.21	0.81662	94428000	40353000	54075000	37	30.3311
0.80936	0.179351	NaN	-0.74271	-0.634207	0.359468	1.16741	0.4034	NaN	0.692053	NaN	0.282165	NaN	0.111132	0.182633	0.398451	0.770468	NaN	0.536041	0.359468	0.340308	-0.0191606	0.461663	S	2	___1	anatomical structure homeostasis;biological regulation;biosynthetic process;box H/ACA snoRNA 3'-end processing;box H/ACA snoRNA metabolic process;box H/ACA snoRNA processing;cell proliferation;cellular biosynthetic process;cellular component organization;cellular component organization at cellular level;cellular component organization or biogenesis;cellular component organization or biogenesis at…	binding;catalytic activity;DNA polymerase activity;intramolecular transferase activity;isomerase activity;nucleic acid binding;nucleotidyltransferase activity;pseudouridine synthase activity;RNA binding;RNA-directed DNA polymerase activity;telomerase activity;transferase activity;transferase activity, transferring phosphorus-containing groups	box H/ACA RNP complex;box H/ACA snoRNP complex;Cajal body;cell part;cytoplasm;intracellular membrane-bounded organelle;intracellular non-membrane-bounded organelle;intracellular organelle;intracellular organelle part;intracellular part;macromolecular complex;membrane-bounded organelle;non-membrane-bounded organelle;nuclear body;nuclear part;nucleolar part;nucleolus;nucleoplasm;nucleoplasm part;nu…	biological regulation;biosynthetic process;cell proliferation;cellular component organization;cellular metabolic process;cellular nitrogen compound metabolic process;cellular process;chromosome organization;DNA metabolic process;DNA replication;homeostatic process;macromolecule metabolic process;macromolecule modification;metabolic process;nitrogen compound metabolic process;nucleobase-containing…	cell part;cytoplasm;intracellular membrane-bounded organelle;intracellular non-membrane-bounded organelle;intracellular organelle;macromolecular complex;nucleolus;nucleoplasm;nucleus;organelle;ribonucleoprotein complex;small nucleolar ribonucleoprotein complex;telomerase holoenzyme complex	Ribosome biogenesis in eukaryotes	DKCLD;PUA;TruB_N	BENPORATH_CYCLING_GENES;BENPORATH_MYC_TARGETS_WITH_EBOX;BIDUS_METASTASIS_UP;BILD_MYC_ONCOGENIC_SIGNATURE;BIOPOLYMER_METABOLIC_PROCESS;BONOME_OVARIAN_CANCER_SURVIVAL_SUBOPTIMAL_DEBULKING;BORCZUK_MALIGNANT_MESOTHELIOMA_UP;BOYAULT_LIVER_CANCER_SUBCLASS_G3_UP;CAIRO_HEPATOBLASTOMA_CLASSES_UP;CASORELLI_ACUTE_PROMYELOCYTIC_LEUKEMIA_DN;CELL_PROLIFERATION_GO_0008283;CHANG_CYCLING_GENES;CHROMOSOME_ORGANIZA…	Acetylation;Alternativesplicing;Completeproteome;Cytoplasm;Directproteinsequencing;Diseasemutation;Dyskeratosiscongenita;Isomerase;Nucleus;Phosphoprotein;Referenceproteome;Ribonucleoprotein;Ribosomebiogenesis;RNA-binding;rRNAprocessing		b-Adrenergic Receptor kinase substrate motif;Casein kinase II substrate motif;G protein-coupled receptor kinase 1 substrate motif	+	CST;HTP	1	8.74177e-62	193.78	171.21	193.78	-0.35999	868960000	623000000	245950000	485	142.222
0.98988	0.664885	-0.0664284	-0.285965	1.48298	1.14627	1.11415	0.117805	NaN	0.235368	0.0119954	NaN	1.29889	0.388369	-0.638381	0.24248	0.621177	0.94742	0.420994	0.827382	0.315425	-0.511958	0.103545	S	3	___1	anatomical structure homeostasis;biological regulation;biosynthetic process;box H/ACA snoRNA 3'-end processing;box H/ACA snoRNA metabolic process;box H/ACA snoRNA processing;cell proliferation;cellular biosynthetic process;cellular component organization;cellular component organization at cellular level;cellular component organization or biogenesis;cellular component organization or biogenesis at…	binding;catalytic activity;DNA polymerase activity;intramolecular transferase activity;isomerase activity;nucleic acid binding;nucleotidyltransferase activity;pseudouridine synthase activity;RNA binding;RNA-directed DNA polymerase activity;telomerase activity;transferase activity;transferase activity, transferring phosphorus-containing groups	box H/ACA RNP complex;box H/ACA snoRNP complex;Cajal body;cell part;cytoplasm;intracellular membrane-bounded organelle;intracellular non-membrane-bounded organelle;intracellular organelle;intracellular organelle part;intracellular part;macromolecular complex;membrane-bounded organelle;non-membrane-bounded organelle;nuclear body;nuclear part;nucleolar part;nucleolus;nucleoplasm;nucleoplasm part;nu…	biological regulation;biosynthetic process;cell proliferation;cellular component organization;cellular metabolic process;cellular nitrogen compound metabolic process;cellular process;chromosome organization;DNA metabolic process;DNA replication;homeostatic process;macromolecule metabolic process;macromolecule modification;metabolic process;nitrogen compound metabolic process;nucleobase-containing…	cell part;cytoplasm;intracellular membrane-bounded organelle;intracellular non-membrane-bounded organelle;intracellular organelle;macromolecular complex;nucleolus;nucleoplasm;nucleus;organelle;ribonucleoprotein complex;small nucleolar ribonucleoprotein complex;telomerase holoenzyme complex	Ribosome biogenesis in eukaryotes	DKCLD;PUA;TruB_N	BENPORATH_CYCLING_GENES;BENPORATH_MYC_TARGETS_WITH_EBOX;BIDUS_METASTASIS_UP;BILD_MYC_ONCOGENIC_SIGNATURE;BIOPOLYMER_METABOLIC_PROCESS;BONOME_OVARIAN_CANCER_SURVIVAL_SUBOPTIMAL_DEBULKING;BORCZUK_MALIGNANT_MESOTHELIOMA_UP;BOYAULT_LIVER_CANCER_SUBCLASS_G3_UP;CAIRO_HEPATOBLASTOMA_CLASSES_UP;CASORELLI_ACUTE_PROMYELOCYTIC_LEUKEMIA_DN;CELL_PROLIFERATION_GO_0008283;CHANG_CYCLING_GENES;CHROMOSOME_ORGANIZA…	Acetylation;Alternativesplicing;Completeproteome;Cytoplasm;Directproteinsequencing;Diseasemutation;Dyskeratosiscongenita;Isomerase;Nucleus;Phosphoprotein;Referenceproteome;Ribonucleoprotein;Ribosomebiogenesis;RNA-binding;rRNAprocessing		b-Adrenergic Receptor kinase substrate motif;Casein kinase I substrate motif;Casein kinase II substrate motif	+	CST;HTP	0.898167	8.74177e-62	193.78	171.21	121.24	-0.15809	2030000000	1497200000	532740000	494	11.0608
1.00512	0.710629	NaN	-0.684113	1.80573	0.662407	1.3025	NaN	0.167742	0.477319	-0.397897	-0.119864	0.901385	0.133718	NaN	0.389467	0.260357	0.430663	0.212904	0.710629	0.324912	-0.385717	0.180641	S	2	___1	anatomical structure homeostasis;biological regulation;biosynthetic process;box H/ACA snoRNA 3'-end processing;box H/ACA snoRNA metabolic process;box H/ACA snoRNA processing;cell proliferation;cellular biosynthetic process;cellular component organization;cellular component organization at cellular level;cellular component organization or biogenesis;cellular component organization or biogenesis at…	binding;catalytic activity;DNA polymerase activity;intramolecular transferase activity;isomerase activity;nucleic acid binding;nucleotidyltransferase activity;pseudouridine synthase activity;RNA binding;RNA-directed DNA polymerase activity;telomerase activity;transferase activity;transferase activity, transferring phosphorus-containing groups	box H/ACA RNP complex;box H/ACA snoRNP complex;Cajal body;cell part;cytoplasm;intracellular membrane-bounded organelle;intracellular non-membrane-bounded organelle;intracellular organelle;intracellular organelle part;intracellular part;macromolecular complex;membrane-bounded organelle;non-membrane-bounded organelle;nuclear body;nuclear part;nucleolar part;nucleolus;nucleoplasm;nucleoplasm part;nu…	biological regulation;biosynthetic process;cell proliferation;cellular component organization;cellular metabolic process;cellular nitrogen compound metabolic process;cellular process;chromosome organization;DNA metabolic process;DNA replication;homeostatic process;macromolecule metabolic process;macromolecule modification;metabolic process;nitrogen compound metabolic process;nucleobase-containing…	cell part;cytoplasm;intracellular membrane-bounded organelle;intracellular non-membrane-bounded organelle;intracellular organelle;macromolecular complex;nucleolus;nucleoplasm;nucleus;organelle;ribonucleoprotein complex;small nucleolar ribonucleoprotein complex;telomerase holoenzyme complex	Ribosome biogenesis in eukaryotes	DKCLD;PUA;TruB_N	BENPORATH_CYCLING_GENES;BENPORATH_MYC_TARGETS_WITH_EBOX;BIDUS_METASTASIS_UP;BILD_MYC_ONCOGENIC_SIGNATURE;BIOPOLYMER_METABOLIC_PROCESS;BONOME_OVARIAN_CANCER_SURVIVAL_SUBOPTIMAL_DEBULKING;BORCZUK_MALIGNANT_MESOTHELIOMA_UP;BOYAULT_LIVER_CANCER_SUBCLASS_G3_UP;CAIRO_HEPATOBLASTOMA_CLASSES_UP;CASORELLI_ACUTE_PROMYELOCYTIC_LEUKEMIA_DN;CELL_PROLIFERATION_GO_0008283;CHANG_CYCLING_GENES;CHROMOSOME_ORGANIZA…	Acetylation;Alternativesplicing;Completeproteome;Cytoplasm;Directproteinsequencing;Diseasemutation;Dyskeratosiscongenita;Isomerase;Nucleus;Phosphoprotein;Referenceproteome;Ribonucleoprotein;Ribosomebiogenesis;RNA-binding;rRNAprocessing		Casein kinase I substrate motif;G protein-coupled receptor kinase 1 substrate motif	+	CST;HTP	1	7.3378e-11	163.2	104.49	84.743	0.53633	76199000	53294000	22905000	513	84.7431
-1.07033	-1.17103	-0.983113	-1.14081	-0.848525	-1.06935	-1.14772	-1.60651	-0.64363	-1.75873	-1.02877	-1.675	-1.14689	-1.24634	-1.70066	-1.43543	-0.943772	-1.41566	0.0404161	-1.07033	-1.41566	-0.345331	0.211458	S	3	___1	biological regulation;biosynthetic process;cellular biosynthetic process;cellular macromolecule biosynthetic process;cellular macromolecule metabolic process;cellular metabolic process;cellular process;cellular protein metabolic process;gene expression;macromolecule biosynthetic process;macromolecule metabolic process;metabolic process;posttranscriptional regulation of gene expression;primary met…	binding;catalytic activity;GTP binding;GTPase activity;guanyl nucleotide binding;guanyl ribonucleotide binding;hydrolase activity;hydrolase activity, acting on acid anhydrides;hydrolase activity, acting on acid anhydrides, in phosphorus-containing anhydrides;nucleic acid binding;nucleoside-triphosphatase activity;nucleotide binding;purine nucleotide binding;purine ribonucleoside triphosphate bind…	cell part;cytoplasm;cytoplasmic part;cytosol;intracellular part	biological regulation;biosynthetic process;cellular metabolic process;cellular process;macromolecule metabolic process;metabolic process;primary metabolic process;protein metabolic process;regulation of translation;translation;translational initiation	cell part;cytoplasm;cytosol	RNA transport	GTP_EFTU;GTP_EFTU_D2;GTP_EFTU_D4;IF-2	ACACTGG,MIR-199A,MIR-199B;BILANGES_SERUM_SENSITIVE_VIA_TSC2;BLALOCK_ALZHEIMERS_DISEASE_INCIPIENT_UP;BLALOCK_ALZHEIMERS_DISEASE_UP;BROWNE_HCMV_INFECTION_1HR_DN;BROWNE_HCMV_INFECTION_48HR_DN;BUCKANOVICH_T_LYMPHOCYTE_HOMING_ON_TUMOR_UP;BYSTRYKH_HEMATOPOIESIS_STEM_CELL_AND_BRAIN_QTL_TRANS;BYSTRYKH_HEMATOPOIESIS_STEM_CELL_QTL_TRANS;CAGTATT,MIR-200B,MIR-200C,MIR-429;CAIRO_HEPATOBLASTOMA_CLASSES_UP;CASO…	Completeproteome;Cytoplasm;Directproteinsequencing;GTP-binding;Initiationfactor;Nucleotide-binding;Phosphoprotein;Polymorphism;Proteinbiosynthesis;Referenceproteome		Casein kinase II substrate motif;G protein-coupled receptor kinase 1 substrate motif;PKA kinase substrate motif;Pyruvate dehydrogenase kinase substrate motif	+	CST;HTP	1	1.98089e-59	198.98	186.79	164.97	0.2659	1353700000	621510000	732180000	164	94.6365
-0.776106	-0.69324	-0.615654	-1.10089	-0.645766	-0.74958	-1.04145	-1.54227	-0.722326	-1.65604	-0.92036	-1.22947	-0.556028	-1.14522	-0.382334	-1.1589	-0.866527	-1.58344	0.319553	-0.74958	-1.14522	-0.395638	0.173525	S	3	___1	biological regulation;biosynthetic process;cellular biosynthetic process;cellular macromolecule biosynthetic process;cellular macromolecule metabolic process;cellular metabolic process;cellular process;cellular protein metabolic process;gene expression;macromolecule biosynthetic process;macromolecule metabolic process;metabolic process;posttranscriptional regulation of gene expression;primary met…	binding;catalytic activity;GTP binding;GTPase activity;guanyl nucleotide binding;guanyl ribonucleotide binding;hydrolase activity;hydrolase activity, acting on acid anhydrides;hydrolase activity, acting on acid anhydrides, in phosphorus-containing anhydrides;nucleic acid binding;nucleoside-triphosphatase activity;nucleotide binding;purine nucleotide binding;purine ribonucleoside triphosphate bind…	cell part;cytoplasm;cytoplasmic part;cytosol;intracellular part	biological regulation;biosynthetic process;cellular metabolic process;cellular process;macromolecule metabolic process;metabolic process;primary metabolic process;protein metabolic process;regulation of translation;translation;translational initiation	cell part;cytoplasm;cytosol	RNA transport	GTP_EFTU;GTP_EFTU_D2;GTP_EFTU_D4;IF-2	ACACTGG,MIR-199A,MIR-199B;BILANGES_SERUM_SENSITIVE_VIA_TSC2;BLALOCK_ALZHEIMERS_DISEASE_INCIPIENT_UP;BLALOCK_ALZHEIMERS_DISEASE_UP;BROWNE_HCMV_INFECTION_1HR_DN;BROWNE_HCMV_INFECTION_48HR_DN;BUCKANOVICH_T_LYMPHOCYTE_HOMING_ON_TUMOR_UP;BYSTRYKH_HEMATOPOIESIS_STEM_CELL_AND_BRAIN_QTL_TRANS;BYSTRYKH_HEMATOPOIESIS_STEM_CELL_QTL_TRANS;CAGTATT,MIR-200B,MIR-200C,MIR-429;CAIRO_HEPATOBLASTOMA_CLASSES_UP;CASO…	Completeproteome;Cytoplasm;Directproteinsequencing;GTP-binding;Initiationfactor;Nucleotide-binding;Phosphoprotein;Polymorphism;Proteinbiosynthesis;Referenceproteome		b-Adrenergic Receptor kinase substrate motif;Casein kinase II substrate motif	+	CST;HTP	1	2.15202e-41	146.76	141.21	64.209	-2.0169	2427200000	1199000000	1228200000	214	64.2091
0.459134	0.119529	-0.429243	-0.13414	0.74947	0.847318	0.321122	0.295853	0.0920055	0.455417	0.282784	0.38878	1.06861	0.109603	0.861538	0.776349	0.085112	0.0857745	0.289485	0.295853	0.38878	0.0929274	0.346191	S	2	___1	biological regulation;biosynthetic process;cell cycle process;cell proliferation;cellular biosynthetic process;cellular component organization;cellular component organization at cellular level;cellular component organization or biogenesis;cellular component organization or biogenesis at cellular level;cellular macromolecule biosynthetic process;cellular macromolecule metabolic process;cellular me…	binding;chromatin binding;DNA binding;histone acetyl-lysine binding;histone binding;nucleic acid binding;p53 binding;protein binding	carboxy-terminal domain protein kinase complex;cell part;chromatin;chromosomal part;chromosome;condensed chromosome;condensed nuclear chromosome;cytoplasm;intracellular membrane-bounded organelle;intracellular non-membrane-bounded organelle;intracellular organelle;intracellular organelle part;intracellular part;macromolecular complex;membrane-bounded organelle;non-membrane-bounded organelle;nucle…	biological regulation;biosynthetic process;cell proliferation;cellular component organization;cellular metabolic process;cellular nitrogen compound metabolic process;cellular process;chromatin modification;chromatin organization;chromosome organization;chromosome segregation;histone modification;macromolecule metabolic process;macromolecule modification;metabolic process;nitrogen compound metabol…	cell part;chromosome;cytoplasm;intracellular membrane-bounded organelle;intracellular non-membrane-bounded organelle;intracellular organelle;macromolecular complex;nuclear chromosome;nucleoplasm;nucleus;organelle;protein complex;transcription elongation factor complex		Bromodomain	AAAGGGA,MIR-204,MIR-211;ACCAAAG,MIR-9;ACTGCCT,MIR-34B;AUNG_GASTRIC_CANCER;BLALOCK_ALZHEIMERS_DISEASE_UP;BUYTAERT_PHOTODYNAMIC_THERAPY_STRESS_UP;BYSTROEM_CORRELATED_WITH_IL5_UP;BYSTRYKH_HEMATOPOIESIS_STEM_CELL_QTL_TRANS;CAGCTG_V$AP4_Q5;chr19p13;GCANCTGNY_V$MYOD_Q6;GGATTA_V$PITX2_Q2;GGCAGCT,MIR-22;GGGTGGRR_V$PAX4_03;GRAESSMANN_APOPTOSIS_BY_DOXORUBICIN_DN;GRESHOCK_CANCER_COPY_NUMBER_UP;GSE11924_TFH_…	3D-structure;Acetylation;Alternativesplicing;Bromodomain;Chromatinregulator;Chromosomalrearrangement;Chromosome;Completeproteome;DNAdamage;Host-virusinteraction;Nucleus;Phosphoprotein;Polymorphism;Referenceproteome;Repeat;Transcription;Transcriptionregulation	BRD4 complex;BRD4-P-TEFb complex;BRD4-RFC complex;P-TEFb-BRD4-TRAP220 complex	ERK1,2 kinase substrate motif;GSK-3, ERK1, ERK2, CDK5 substrate motif;PKA kinase substrate motif;PKC kinase substrate motif;WW domain binding motif	+	CST;HTP	1	0.000201608	133.32	103.18	119.62	0.28439	562920000	405780000	157140000	1117	119.617
NaN	1.50953	1.69218	1.57856	-0.842814	NaN	NaN	1.54877	NaN	1.16573	1.44886	NaN	-0.077889	1.25135	0.432736	0.636353	NaN	NaN	0.614259	1.54877	0.901043	-0.647726	0.0508562	S	3	___1	biological regulation;negative regulation of biological process;negative regulation of catalytic activity;negative regulation of cellular metabolic process;negative regulation of cellular process;negative regulation of cellular protein metabolic process;negative regulation of dephosphorylation;negative regulation of hydrolase activity;negative regulation of macromolecule metabolic process;negativ…	binding;enzyme binding;enzyme inhibitor activity;enzyme regulator activity;phosphatase binding;phosphatase inhibitor activity;phosphatase regulator activity;protein binding;protein phosphatase 1 binding;protein phosphatase binding;protein phosphatase inhibitor activity;protein phosphatase regulator activity;protein serine/threonine phosphatase inhibitor activity	cell part;cytoplasm;intracellular membrane-bounded organelle;intracellular organelle;intracellular part;membrane-bounded organelle;nucleus;organelle	biological regulation;regulation of protein modification process	cell part;cytoplasm;intracellular membrane-bounded organelle;intracellular organelle;nucleus;organelle		PPI_Ypi1	BENPORATH_SOX2_TARGETS;BLALOCK_ALZHEIMERS_DISEASE_DN;BLUM_RESPONSE_TO_SALIRASIB_UP;BRUINS_UVC_RESPONSE_EARLY_LATE;CACTGCC,MIR-34A,MIR-34C,MIR-449;CACTGTG,MIR-128A,MIR-128B;CAGCACT,MIR-512-3P;CAGCCTC,MIR-485-5P;CELL_FRACTION;chr6p21;DAIRKEE_TERT_TARGETS_UP;ENK_UV_RESPONSE_KERATINOCYTE_UP;GSE11864_CSF1_VS_CSF1_IFNG_PAM3CYS_IN_MAC_DN;GSE11864_UNTREATED_VS_CSF1_PAM3CYS_IN_MAC_DN;GSE12845_IGD_NEG_BLOO…	Acetylation;Completeproteome;Phosphoprotein;Proteinphosphataseinhibitor;Referenceproteome		14-3-3 domain binding motif;Calmodulin-dependent protein kinase II substrate motif;Calmodulin-dependent protein kinase IV substrate motif;Chk1 kinase substrate motif;MDC1 BRCT domain binding motif;PAK2 kinase substrate motif;PKA kinase substrate motif;PKC epsilon kinase substrate motif;PKC kinase substrate motif;Plk1 PBD domain binding motif	+	CST	0.966188	4.46654e-07	112.12	99.92	111.01	-0.26071	98971000	84303000	14668000	58	14.56
4.72018	0.289387	0.380618	2.22672	NaN	NaN	NaN	3.7478	NaN	NaN	2.0609	0.965032	NaN	NaN	4.64533	1.04801	NaN	1.51203	0.844385	2.22672	1.51203	-0.714694	0.0342595	S	3	___1	biological regulation;cell surface receptor linked signaling pathway;cellular process;cellular response to stimulus;defense response;immune system process;negative regulation of biological process;negative regulation of cell differentiation;negative regulation of cellular process;negative regulation of developmental process;negative regulation of myeloid cell differentiation;negative regulation o…	molecular transducer activity;receptor activity;signal transducer activity;signaling receptor activity;transmembrane signaling receptor activity	cell part;integral to membrane;integral to plasma membrane;intrinsic to membrane;intrinsic to plasma membrane;membrane part;plasma membrane part	biological regulation;cellular process;immune system process;response to stimulus;response to stress;signal transduction	cell part			APPEL_IMATINIB_RESPONSE;CELL_SURFACE_RECEPTOR_LINKED_SIGNAL_TRANSDUCTION_GO_0007166;chr19q13;DEFENSE_RESPONSE;DIAZ_CHRONIC_MEYLOGENOUS_LEUKEMIA_DN;FONTAINE_FOLLICULAR_THYROID_ADENOMA_DN;FONTAINE_PAPILLARY_THYROID_CARCINOMA_DN;FONTAINE_THYROID_TUMOR_UNCERTAIN_MALIGNANCY_DN;FULCHER_INFLAMMATORY_RESPONSE_LECTIN_VS_LPS_DN;GAL_LEUKEMIC_STEM_CELL_DN;GNF2_CARD15;GNF2_CASP1;GNF2_CD14;GNF2_CD1D;GNF2_CD33;…	Adaptiveimmunity;Alternativesplicing;Cellmembrane;Completeproteome;Disulfidebond;Glycoprotein;Immunity;Immunoglobulindomain;Membrane;Phosphoprotein;Polymorphism;Receptor;Referenceproteome;Repeat;Signal;Transmembrane;Transmembranehelix		G protein-coupled receptor kinase 1 substrate motif;PKA kinase substrate motif;PKC kinase substrate motif	+	HTP	1	3.21757e-28	153.19	139.33	97.771	0.72687	256780000	247070000	9703500	502	93.9666
3.54198	3.79849	2.93046	4.42992	NaN	NaN	2.06555	NaN	NaN	NaN	4.8036	4.10808	NaN	5.81097	4.32622	3.92108	NaN	5.95652	0.0243486	3.54198	4.56491	1.02293	0.00199075	S	3	___1	biological regulation;cell surface receptor linked signaling pathway;cellular process;cellular response to stimulus;defense response;immune system process;negative regulation of biological process;negative regulation of cell differentiation;negative regulation of cellular process;negative regulation of developmental process;negative regulation of myeloid cell differentiation;negative regulation o…	molecular transducer activity;receptor activity;signal transducer activity;signaling receptor activity;transmembrane signaling receptor activity	cell part;integral to membrane;integral to plasma membrane;intrinsic to membrane;intrinsic to plasma membrane;membrane part;plasma membrane part	biological regulation;cellular process;immune system process;response to stimulus;response to stress;signal transduction	cell part			APPEL_IMATINIB_RESPONSE;CELL_SURFACE_RECEPTOR_LINKED_SIGNAL_TRANSDUCTION_GO_0007166;chr19q13;DEFENSE_RESPONSE;DIAZ_CHRONIC_MEYLOGENOUS_LEUKEMIA_DN;FONTAINE_FOLLICULAR_THYROID_ADENOMA_DN;FONTAINE_PAPILLARY_THYROID_CARCINOMA_DN;FONTAINE_THYROID_TUMOR_UNCERTAIN_MALIGNANCY_DN;FULCHER_INFLAMMATORY_RESPONSE_LECTIN_VS_LPS_DN;GAL_LEUKEMIC_STEM_CELL_DN;GNF2_CARD15;GNF2_CASP1;GNF2_CD14;GNF2_CD1D;GNF2_CD33;…	Adaptiveimmunity;Alternativesplicing;Cellmembrane;Completeproteome;Disulfidebond;Glycoprotein;Immunity;Immunoglobulindomain;Membrane;Phosphoprotein;Polymorphism;Receptor;Referenceproteome;Repeat;Signal;Transmembrane;Transmembranehelix		14-3-3 domain binding motif;Calmodulin-dependent protein kinase II substrate motif;Calmodulin-dependent protein kinase IV substrate motif;Chk1 kinase substrate motif;ERK1,2 kinase substrate motif;GSK-3, ERK1, ERK2, CDK5 substrate motif;MDC1 BRCT domain binding motif;PAK2 kinase substrate motif;PKA kinase substrate motif;PKC epsilon kinase substrate motif;PKC kinase substrate motif;Plk1 PBD domain…	+	CST	1	5.21351e-109	240.44	216.81	97.771	0.72687	795890000	776510000	19385000	503	94.3249
-1.1655	-0.440872	0.159908	0.422389	-1.31831	NaN	-0.56355	NaN	NaN	-0.183437	-0.029473	NaN	-1.17897	-0.569068	-0.242101	-0.653858	-0.785896	-1.55961	0.634969	-0.502211	-0.611463	-0.109252	0.440654	S	2	___1	axon guidance;biological regulation;cell cycle;cell cycle phase;cell cycle process;cell division;cellular component organization;cellular component organization at cellular level;cellular component organization or biogenesis;cellular component organization or biogenesis at cellular level;cellular process;cellular response to stimulus;chemotaxis;cytoskeleton organization;establishment or maintenan…	alpha(1,2)-fucosyltransferase activity;binding;catalytic activity;cytoskeletal protein binding;fucosyltransferase activity;galactoside 2-alpha-L-fucosyltransferase activity;microtubule binding;microtubule plus-end binding;protein binding;transferase activity;transferase activity, transferring glycosyl groups;transferase activity, transferring hexosyl groups;tubulin binding	cell cortex;cell part;cell projection membrane;cell projection part;chromosomal part;condensed chromosome kinetochore;cytoplasm;cytoplasmic microtubule;cytoplasmic part;cytoskeletal part;cytosol;Golgi apparatus;Golgi apparatus part;intracellular membrane-bounded organelle;intracellular non-membrane-bounded organelle;intracellular organelle;intracellular organelle part;intracellular part;kinetocho…	biological regulation;cell cycle;cell division;cellular component organization;cellular process;cytoskeleton organization;establishment or maintenance of cell polarity;locomotion;microtubule organizing center organization;mitosis;mitotic cell cycle;nuclear division;organelle fission;organelle organization;regulation of organelle organization;response to chemical stimulus;response to external stim…	cell cortex;cell part;cytoplasm;cytosol;Golgi apparatus;intracellular membrane-bounded organelle;intracellular non-membrane-bounded organelle;intracellular organelle;kinetochore;macromolecular complex;membrane;microtubule organizing center;organelle;plasma membrane;protein complex		CLASP_N	ACEVEDO_METHYLATED_IN_LIVER_CANCER_DN;ANATOMICAL_STRUCTURE_DEVELOPMENT;ANATOMICAL_STRUCTURE_MORPHOGENESIS;ATGCTGG,MIR-338;BLALOCK_ALZHEIMERS_DISEASE_DN;BOYLAN_MULTIPLE_MYELOMA_C_D_UP;CAGTATT,MIR-200B,MIR-200C,MIR-429;CAGTGTT,MIR-141,MIR-200A;CATGTAA,MIR-496;CATTTCA,MIR-203;chr3p24;CTACCTC,LET-7A,LET-7B,LET-7C,LET-7D,LET-7E,LET-7F,MIR-98,LET-7G,LET-7I;CYTOPLASM;CYTOPLASMIC_PART;CYTOSKELETAL_PART;C…	Alternativesplicing;Cellcycle;Celldivision;Cellmembrane;Cellprojection;Centromere;Chromosome;Coiledcoil;Completeproteome;Cytoplasm;Cytoskeleton;Golgiapparatus;Kinetochore;Membrane;Microtubule;Mitosis;Phosphoprotein;Referenceproteome;Repeat		14-3-3 domain binding motif;Calmodulin-dependent protein kinase I substrate motif;Calmodulin-dependent protein kinase II substrate motif;Calmodulin-dependent protein kinase IV substrate motif;Casein kinase II substrate motif;Chk1 kinase substrate motif;PKA kinase substrate motif;PKC kinase substrate motif;Pyruvate dehydrogenase kinase substrate motif	+	CST;HTP	0.995965	9.2642e-53	172.3	138.94	172.3	-1.3488	450100000	264880000	185220000	604	23.9243
NaN	-2.1967	-1.24054	-2.11606	-3.63047	-3.73056	NaN	-3.17626	-2.94278	-3.97479	-2.76706	-2.45252	NaN	-3.43621	-3.50548	-2.30419	-0.84866	NaN	0.945259	-2.94278	-2.76706	0.175725	0.268691	S	3	___1	axon guidance;biological regulation;cell cycle;cell cycle phase;cell cycle process;cell division;cellular component organization;cellular component organization at cellular level;cellular component organization or biogenesis;cellular component organization or biogenesis at cellular level;cellular process;cellular response to stimulus;chemotaxis;cytoskeleton organization;establishment or maintenan…	alpha(1,2)-fucosyltransferase activity;binding;catalytic activity;cytoskeletal protein binding;fucosyltransferase activity;galactoside 2-alpha-L-fucosyltransferase activity;microtubule binding;microtubule plus-end binding;protein binding;transferase activity;transferase activity, transferring glycosyl groups;transferase activity, transferring hexosyl groups;tubulin binding	cell cortex;cell part;cell projection membrane;cell projection part;chromosomal part;condensed chromosome kinetochore;cytoplasm;cytoplasmic microtubule;cytoplasmic part;cytoskeletal part;cytosol;Golgi apparatus;Golgi apparatus part;intracellular membrane-bounded organelle;intracellular non-membrane-bounded organelle;intracellular organelle;intracellular organelle part;intracellular part;kinetocho…	biological regulation;cell cycle;cell division;cellular component organization;cellular process;cytoskeleton organization;establishment or maintenance of cell polarity;locomotion;microtubule organizing center organization;mitosis;mitotic cell cycle;nuclear division;organelle fission;organelle organization;regulation of organelle organization;response to chemical stimulus;response to external stim…	cell cortex;cell part;cytoplasm;cytosol;Golgi apparatus;intracellular membrane-bounded organelle;intracellular non-membrane-bounded organelle;intracellular organelle;kinetochore;macromolecular complex;membrane;microtubule organizing center;organelle;plasma membrane;protein complex		CLASP_N	ACEVEDO_METHYLATED_IN_LIVER_CANCER_DN;ANATOMICAL_STRUCTURE_DEVELOPMENT;ANATOMICAL_STRUCTURE_MORPHOGENESIS;ATGCTGG,MIR-338;BLALOCK_ALZHEIMERS_DISEASE_DN;BOYLAN_MULTIPLE_MYELOMA_C_D_UP;CAGTATT,MIR-200B,MIR-200C,MIR-429;CAGTGTT,MIR-141,MIR-200A;CATGTAA,MIR-496;CATTTCA,MIR-203;chr3p24;CTACCTC,LET-7A,LET-7B,LET-7C,LET-7D,LET-7E,LET-7F,MIR-98,LET-7G,LET-7I;CYTOPLASM;CYTOPLASMIC_PART;CYTOSKELETAL_PART;C…	Alternativesplicing;Cellcycle;Celldivision;Cellmembrane;Cellprojection;Centromere;Chromosome;Coiledcoil;Completeproteome;Cytoplasm;Cytoskeleton;Golgiapparatus;Kinetochore;Membrane;Microtubule;Mitosis;Phosphoprotein;Referenceproteome;Repeat		Calmodulin-dependent protein kinase II substrate motif;Casein kinase II substrate motif;Chk1 kinase substrate motif;PKA kinase substrate motif;PKC kinase substrate motif;Pyruvate dehydrogenase kinase substrate motif			1	1.68543e-95	217.83	205.22	152.38	0.10437	538970000	120990000	417980000	241	87.1333
3.79939	-0.109782	0.7289	0.179864	-0.534477	-0.522225	0.209371	0.795064	0.293831	0.0850697	1.77868	0.914695	0.113099	1.0405	-0.127104	0.740121	NaN	2.29561	0.559471	0.209371	0.827408	0.618037	0.0360752	S	3	___1	anatomical structure development;biological regulation;biosynthetic process;cellular biosynthetic process;cellular component organization;cellular component organization at cellular level;cellular component organization or biogenesis;cellular component organization or biogenesis at cellular level;cellular macromolecule biosynthetic process;cellular macromolecule metabolic process;cellular metabol…	binding;catalytic activity;cation binding;demethylase activity;dioxygenase activity;histone binding;histone demethylase activity;histone demethylase activity (H3-K9 specific);ion binding;iron ion binding;metal ion binding;methylated histone residue binding;oxidoreductase activity;protein binding;transition metal ion binding;zinc ion binding	cell part;chromosomal part;condensed chromosome kinetochore;cytoplasm;intracellular membrane-bounded organelle;intracellular non-membrane-bounded organelle;intracellular organelle;intracellular organelle part;intracellular part;kinetochore;macromolecular complex;membrane-bounded organelle;non-membrane-bounded organelle;nuclear part;nucleolus;nucleoplasm;nucleus;organelle;organelle part;protein co…	anatomical structure development;biological regulation;biosynthetic process;cellular component organization;cellular metabolic process;cellular nitrogen compound metabolic process;cellular process;chromatin organization;chromosome organization;developmental process;macromolecule metabolic process;macromolecule modification;metabolic process;nitrogen compound metabolic process;nucleobase-containin…	cell part;cytoplasm;intracellular membrane-bounded organelle;intracellular non-membrane-bounded organelle;intracellular organelle;kinetochore;macromolecular complex;nucleolus;nucleoplasm;nucleus;organelle;protein complex		JmjC;PHD	ACCTGTTG_UNKNOWN;AGCACTT,MIR-93,MIR-302A,MIR-302B,MIR-302C,MIR-302D,MIR-372,MIR-373,MIR-520E,MIR-520A,MIR-526B,MIR-520B,MIR-520C,MIR-520D;ATGTACA,MIR-493;ATGTAGC,MIR-221,MIR-222;BASSO_HAIRY_CELL_LEUKEMIA_DN;BILD_E2F3_ONCOGENIC_SIGNATURE;chr9q22;CTTGTAT,MIR-381;DARWICHE_PAPILLOMA_RISK_HIGH_DN;DARWICHE_PAPILLOMA_RISK_LOW_DN;DARWICHE_SKIN_TUMOR_PROMOTER_DN;DARWICHE_SQUAMOUS_CELL_CARCINOMA_DN;FLECHNE…	3D-structure;Acetylation;Activator;Centromere;Chromatinregulator;Chromosome;Completeproteome;Dioxygenase;Iron;Kinetochore;Metal-binding;Nucleus;Oxidoreductase;Phosphoprotein;Polymorphism;Referenceproteome;Transcription;Transcriptionregulation;Zinc;Zinc-finger		14-3-3 domain binding motif;Calmodulin-dependent protein kinase II substrate motif;G protein-coupled receptor kinase 1 substrate motif;MAPKAPK1 kinase substrate motif;Pim1 kinase substrate sequence;PKA kinase substrate motif;PKA, PKG kinase substrate motif;PKC epsilon kinase substrate motif;PKC kinase substrate motif;PKG kinase substrate motif	+	CST;HTP;LTP	1	3.95225e-11	102.43	101.3	98.957	1.6718	455710000	318080000	137640000	899	79.2315
1.57112	0.726925	0.64686	0.386742	1.32729	1.56549	0.944208	0.591999	1.51784	0.786333	0.725898	0.521887	1.51147	1.30308	0.951815	1.19366	0.417612	1.10468	0.67505	0.944208	0.951815	0.00760722	0.433394	S	3	___1	establishment of localization;establishment of localization in cell;establishment of RNA localization;intracellular transport;mRNA export from nucleus;mRNA transport;nuclear export;nuclear transport;nucleic acid transport;nucleobase-containing compound transport;nucleocytoplasmic transport;poly(A)+ mRNA export from nucleus;RNA export from nucleus;RNA transport;transport	binding;cation binding;ion binding;metal ion binding		establishment of localization;nuclear transport;nucleobase-containing compound transport;nucleocytoplasmic transport;transport				AACTGGA,MIR-145;ACCATTT,MIR-522;ATACCTC,MIR-202;ATTCTTT,MIR-186;BASAKI_YBX1_TARGETS_DN;BYSTRYKH_HEMATOPOIESIS_STEM_CELL_QTL_CIS;chr1q32;DODD_NASOPHARYNGEAL_CARCINOMA_DN;GARY_CD5_TARGETS_UP;GAUSSMANN_MLL_AF4_FUSION_TARGETS_C_UP;GGCCAGT,MIR-193A,MIR-193B;GSE10856_CTRL_VS_TNFRSF6B_IN_MACROPHAGE_UP;GSE17721_0.5H_VS_12H_PAM3CSK4_BMDM_DN;GSE17721_0.5H_VS_24H_PAM3CSK4_BMDM_DN;GSE17721_CTRL_VS_CPG_6H_BMD…	Acetylation;Coiledcoil;Completeproteome;Metal-binding;mRNAtransport;Phosphoprotein;Polymorphism;Referenceproteome;Repeat;Transport;Zinc;Zinc-finger		14-3-3 domain binding motif;Calmodulin-dependent protein kinase II substrate motif;Pim1 kinase substrate sequence;PKA kinase substrate motif;PKC epsilon kinase substrate motif;PKC kinase substrate motif	+	CST;HTP	1	1.50955e-27	155.24	149.19	154.48	-0.24823	1664800000	1322200000	342610000	290	82.7014
-0.334512	NaN	-0.149685	0.126959	-0.0602962	0.155575	-0.23424	NaN	-0.169571	0.363217	NaN	0.517039	0.502999	0.0179015	0.101004	0.383862	0.193678	-0.256808	0.0166714	-0.149685	0.278448	0.428132	0.098362	S	3	___1	establishment of localization;establishment of localization in cell;establishment of RNA localization;intracellular transport;mRNA export from nucleus;mRNA transport;nuclear export;nuclear transport;nucleic acid transport;nucleobase-containing compound transport;nucleocytoplasmic transport;poly(A)+ mRNA export from nucleus;RNA export from nucleus;RNA transport;transport	binding;cation binding;ion binding;metal ion binding		establishment of localization;nuclear transport;nucleobase-containing compound transport;nucleocytoplasmic transport;transport				AACTGGA,MIR-145;ACCATTT,MIR-522;ATACCTC,MIR-202;ATTCTTT,MIR-186;BASAKI_YBX1_TARGETS_DN;BYSTRYKH_HEMATOPOIESIS_STEM_CELL_QTL_CIS;chr1q32;DODD_NASOPHARYNGEAL_CARCINOMA_DN;GARY_CD5_TARGETS_UP;GAUSSMANN_MLL_AF4_FUSION_TARGETS_C_UP;GGCCAGT,MIR-193A,MIR-193B;GSE10856_CTRL_VS_TNFRSF6B_IN_MACROPHAGE_UP;GSE17721_0.5H_VS_12H_PAM3CSK4_BMDM_DN;GSE17721_0.5H_VS_24H_PAM3CSK4_BMDM_DN;GSE17721_CTRL_VS_CPG_6H_BMD…	Acetylation;Coiledcoil;Completeproteome;Metal-binding;mRNAtransport;Phosphoprotein;Polymorphism;Referenceproteome;Repeat;Transport;Zinc;Zinc-finger		14-3-3 domain binding motif;Calmodulin-dependent protein kinase II substrate motif;Casein kinase II substrate motif;G protein-coupled receptor kinase 1 substrate motif;MAPKAPK1 kinase substrate motif;PAK2 kinase substrate motif;PKA kinase substrate motif;PKC epsilon kinase substrate motif;PKC kinase substrate motif	+	CST;HTP	0.999989	1.82505e-71	195.58	175.59	118.15	-1.3453	3261900000	2408800000	853110000	758	49.9116
-0.372886	2.28673	1.26763	1.32339	-0.412935	0.753983	-0.332227	NaN	-0.690678	0.610265	NaN	1.81043	1.06488	2.28074	2.27487	1.25455	1.7328	-1.09469	0.185206	0.210878	1.49368	1.2828	0.000175979	S	3	___1		enzyme inhibitor activity;enzyme regulator activity;phosphatase inhibitor activity;phosphatase regulator activity;protein phosphatase inhibitor activity;protein phosphatase regulator activity					RPEL	AAGGGAT,MIR-188;AATGTGA,MIR-23A,MIR-23B;ATGTTAA,MIR-302C;BILD_CTNNB1_ONCOGENIC_SIGNATURE;BONOME_OVARIAN_CANCER_SURVIVAL_OPTIMAL_DEBULKING;BONOME_OVARIAN_CANCER_SURVIVAL_SUBOPTIMAL_DEBULKING;BRUECKNER_TARGETS_OF_MIRLET7A3_UP;CHEMNITZ_RESPONSE_TO_PROSTAGLANDIN_E2_DN;CHIANG_LIVER_CANCER_SUBCLASS_POLYSOMY7_DN;chr6q24;DAVICIONI_TARGETS_OF_PAX_FOXO1_FUSIONS_UP;DEURIG_T_CELL_PROLYMPHOCYTIC_LEUKEMIA_DN;D…	Actin-binding;Alternativesplicing;Completeproteome;Phosphoprotein;Polymorphism;Proteinphosphataseinhibitor;Referenceproteome;Repeat		14-3-3 domain binding motif;Calmodulin-dependent protein kinase II alpha substrate motif;Calmodulin-dependent protein kinase II substrate motif;Calmodulin-dependent protein kinase IV substrate motif;Chk1 kinase substrate motif;DMPK1,2 kinase substrate motif;G protein-coupled receptor kinase 1 substrate motif;MAPKAPK2 kinase substrate motif;Phosphorylase kinase substrate motif;PKA kinase substrate…	+	CST;HTP	0.999997	6.00215e-37	178.76	139.69	178.76	-0.42743	149540000	115100000	34435000	480	55.1728
-0.434599	0.359135	0.438892	0.591155	0.0820391	NaN	NaN	NaN	NaN	-0.117755	1.58584	1.12657	-0.392017	0.381268	0.762933	0.326442	NaN	0.0190378	0.408772	0.359135	0.353855	-0.00527991	0.446971	S	3	___1			cell part;cytoplasm;intracellular membrane-bounded organelle;intracellular organelle;intracellular part;membrane-bounded organelle;organelle		cell part;cytoplasm;intracellular membrane-bounded organelle;intracellular organelle;organelle		SAPS	ACTACCT,MIR-196A,MIR-196B;ACTGCCT,MIR-34B;ATGCTGC,MIR-103,MIR-107;BROWNE_HCMV_INFECTION_48HR_DN;chr22q13;GACAGGG,MIR-339;GCACTTT,MIR-17-5P,MIR-20A,MIR-106A,MIR-106B,MIR-20B,MIR-519D;GINESTIER_BREAST_CANCER_ZNF217_AMPLIFIED_DN;GSE13306_TREG_VS_TCONV_LAMINA_PROPRIA_DN;GSE14308_TH1_VS_INDUCED_TREG_DN;GSE14308_TH2_VS_TH1_UP;GSE1460_CD4_THYMOCYTE_VS_NAIVE_CD4_TCELL_ADULT_BLOOD_DN;GSE1460_CORD_VS_ADULT…	Alternativesplicing;Completeproteome;Cytoplasm;Phosphoprotein;Polymorphism;Referenceproteome	TNF-alpha/NF-kappa B signaling complex (CHUK, BTRC, NFKB2, PPP6C, REL, CUL1, IKBKE, SAPS2, SAPS1, ANKRD28, RELA, SKP1)	14-3-3 domain binding motif;Calmodulin-dependent protein kinase II substrate motif;Casein kinase II substrate motif;ERK1,2 kinase substrate motif;G protein-coupled receptor kinase 1 substrate motif;GSK-3, ERK1, ERK2, CDK5 substrate motif;MDC1 BRCT domain binding motif;PKA kinase substrate motif;PKC kinase substrate motif;Plk1 PBD domain binding motif;Pyruvate dehydrogenase kinase substrate motif;…	+	CST;HTP	0.998763	1.50527e-16	114.55	111.76	93.371	-0.66723	74296000	51147000	23149000	717	29.1215
-0.516594	-0.863377	-0.975944	-0.703889	0.505165	-0.0999792	0.203851	-0.675862	-0.372913	0.701996	NaN	-0.787625	-0.752139	-0.905635	-0.169117	-0.959112	0.762171	-0.816826	0.940814	-0.516594	-0.769882	-0.253289	0.292138	S	3	___1	actin cytoskeleton organization;actin filament-based process;anatomical structure development;biological adhesion;biological regulation;cell adhesion;cell differentiation;cell differentiation involved in embryonic placenta development;cell-cell adhesion;cellular component organization;cellular component organization at cellular level;cellular component organization or biogenesis;cellular componen…	ATPase activator activity;ATPase regulator activity;binding;chaperone binding;DNA binding;enzyme activator activity;enzyme regulator activity;heat shock protein binding;nucleic acid binding;nucleoside-triphosphatase regulator activity;protein binding;unfolded protein binding	cell part;contractile fiber part;cytoplasm;cytoplasmic part;cytosol;intracellular membrane-bounded organelle;intracellular organelle;intracellular organelle part;intracellular part;membrane;membrane-bounded organelle;nuclear part;nucleoplasm;nucleus;organelle;organelle part;perinuclear region of cytoplasm;Z disc	anatomical structure development;biological adhesion;biological regulation;cell adhesion;cell differentiation;cellular component organization;cellular localization;cellular metabolic process;cellular process;cytoskeleton organization;developmental process;extracellular matrix organization;extracellular structure organization;localization;macromolecule metabolic process;metabolic process;organelle…	cell part;cytoplasm;cytosol;intracellular membrane-bounded organelle;intracellular organelle;membrane;nucleoplasm;nucleus;organelle		DnaJ	AKL_HTLV1_INFECTION_DN;ALFANO_MYC_TARGETS;AMUNDSON_RESPONSE_TO_ARSENITE;APOPTOSIS_GO;ATGTTAA,MIR-302C;BENPORATH_CYCLING_GENES;BENPORATH_ES_1;BROWNE_HCMV_INFECTION_10HR_UP;BURTON_ADIPOGENESIS_PEAK_AT_2HR;BUYTAERT_PHOTODYNAMIC_THERAPY_STRESS_UP;BYSTRYKH_HEMATOPOIESIS_STEM_CELL_AND_BRAIN_QTL_TRANS;CACCAGC,MIR-138;CACTTTG,MIR-520G,MIR-520H;CAGTATT,MIR-200B,MIR-200C,MIR-429;CCTGCTG,MIR-214;CELL_DEVELO…	Alternativesplicing;Chaperone;Completeproteome;Cytoplasm;Directproteinsequencing;Diseasemutation;Limb-girdlemusculardystrophy;Nucleus;Phosphoprotein;Referenceproteome		BARD1 BRCT domain binding motif;Casein kinase II substrate motif;G protein-coupled receptor kinase 1 substrate motif	+	CST;HTP	1	1.13718e-73	197.84	194.91	42.639	-0.45045	913090000	581780000	331310000	277	42.6394
-0.665162	0.370527	1.06398	0.984509	-0.342431	0.47506	0.225345	NaN	NaN	0.583348	NaN	0.505937	-0.0921196	0.619881	0.870163	0.356109	0.853293	NaN	0.425296	0.370527	0.583348	0.212822	0.23704	S	2	___1	biological regulation;catabolic process;cation transport;cell cycle process;cellular catabolic process;cellular component disassembly;cellular component disassembly at cellular level;cellular component organization;cellular component organization at cellular level;cellular component organization or biogenesis;cellular component organization or biogenesis at cellular level;cellular macromolecular …	adenyl nucleotide binding;adenyl ribonucleotide binding;ATP binding;ATPase activity;ATPase activity, coupled;binding;catalytic activity;hydrolase activity;hydrolase activity, acting on acid anhydrides;hydrolase activity, acting on acid anhydrides, in phosphorus-containing anhydrides;identical protein binding;nucleoside-triphosphatase activity;nucleotide binding;protein binding;protein C-terminus …	cell part;centrosome;cytoplasm;cytoplasmic part;cytoskeletal part;cytosol;endosomal part;endosome;endosome membrane;extracellular membrane-bounded organelle;extracellular organelle;extracellular region part;extracellular vesicular exosome;intracellular membrane-bounded organelle;intracellular non-membrane-bounded organelle;intracellular organelle;intracellular organelle part;intracellular part;la…	biological regulation;catabolic process;cellular component disassembly;cellular component organization;cellular metabolic process;cellular process;endosome organization;endosome transport;establishment of localization;ion transport;lipid transport;macromolecule metabolic process;membrane organization;metabolic process;nucleus organization;organelle organization;primary metabolic process;protein d…	cell part;centrosome;cytoplasm;cytosol;endosome;extracellular organelle;intracellular membrane-bounded organelle;intracellular non-membrane-bounded organelle;intracellular organelle;membrane;microtubule organizing center;nucleus;organelle;vesicle	Endocytosis	AAA;MIT;Vps4_C	ATAACCT,MIR-154;ATPASE_ACTIVITY;ATPASE_ACTIVITY_COUPLED;BIOPOLYMER_METABOLIC_PROCESS;BUYTAERT_PHOTODYNAMIC_THERAPY_STRESS_UP;CACTGTG,MIR-128A,MIR-128B;CELLULAR_LOCALIZATION;CHEN_LIVER_METABOLISM_QTL_CIS;chr18q21;CTCAGGG,MIR-125B,MIR-125A;CYTOPLASM;CYTOPLASMIC_PART;DIAZ_CHRONIC_MEYLOGENOUS_LEUKEMIA_UP;ENDOSOME;ENDOSOME_TRANSPORT;ESTABLISHMENT_OF_CELLULAR_LOCALIZATION;ESTABLISHMENT_OF_LOCALIZATION;…	3D-structure;Acetylation;ATP-binding;Cellcycle;Celldivision;Coiledcoil;Completeproteome;Endosome;Hydrolase;Membrane;Nucleotide-binding;Phosphoprotein;Polymorphism;Proteintransport;Referenceproteome;Transport		b-Adrenergic Receptor kinase substrate motif;Casein kinase II substrate motif;PKA kinase substrate motif	+	HTP	1	3.51628e-23	127.95	121.71	123.54	-0.29132	470450000	341750000	128700000	102	79.6942
NaN	-0.5813	NaN	NaN	-0.608013	0.20383	-0.727099	NaN	-0.299672	0.252363	NaN	NaN	-0.0473792	-1.23802	0.459602	-0.0506388	NaN	-0.23236	0.400257	-0.5813	-0.049009	0.532291	0.058307	S	2	___1	alpha-beta T cell activation;alpha-beta T cell differentiation;anatomical structure development;biological regulation;biosynthetic process;CD4-positive, alpha-beta T cell activation;CD4-positive, alpha-beta T cell differentiation;CD4-positive, CD25-positive, alpha-beta regulatory T cell differentiation;cell activation;cell differentiation;cell surface receptor linked signaling pathway;cellular bi…	activating transcription factor binding;binding;chromatin binding;DNA binding;enzyme binding;enzyme regulator activity;histone deacetylase binding;histone deacetylase regulator activity;hormone receptor binding;nuclear hormone receptor binding;nucleic acid binding;nucleic acid binding transcription factor activity;protein binding;protein binding transcription factor activity;receptor binding;regu…	cell part;chromatin;chromosomal part;cytoplasm;cytoskeletal part;intracellular membrane-bounded organelle;intracellular organelle;intracellular organelle part;intracellular part;macromolecular complex;membrane;membrane-bounded organelle;microtubule;nuclear chromatin;nuclear chromosome part;nuclear part;nucleoplasm;nucleoplasm part;nucleus;organelle;organelle part;protein complex;spindle microtubu…	anatomical structure development;biological regulation;biosynthetic process;cell activation;cell differentiation;cellular component assembly;cellular component organization;cellular lipid metabolic process;cellular metabolic process;cellular nitrogen compound metabolic process;cellular process;chromatin modification;chromatin organization;chromosome organization;cytoskeleton organization;developm…	cell part;cytoplasm;intracellular membrane-bounded organelle;intracellular organelle;macromolecular complex;membrane;nucleoplasm;nucleus;organelle;protein complex;transcription factor complex;transcriptional repressor complex		Myb_DNA-binding	BENPORATH_NANOG_TARGETS;BIOCARTA_PPARA_PATHWAY;BIOCARTA_VDR_PATHWAY;BIOPOLYMER_METABOLIC_PROCESS;CAGGTG_V$E12_Q6;chr17p11;CTAWWWATA_V$RSRFC4_Q2;CUI_TCF21_TARGETS_2_DN;DE_YY1_TARGETS_DN;DELACROIX_RAR_BOUND_ES;DIAZ_CHRONIC_MEYLOGENOUS_LEUKEMIA_UP;GAZDA_DIAMOND_BLACKFAN_ANEMIA_ERYTHROID_DN;GGGAGGRR_V$MAZ_Q6;GOBERT_OLIGODENDROCYTE_DIFFERENTIATION_DN;GRAESSMANN_APOPTOSIS_BY_DOXORUBICIN_DN;GSE11864_UNT…	3D-structure;Acetylation;Alternativesplicing;Chromatinregulator;Coiledcoil;Completeproteome;DNA-binding;Nucleus;Phosphoprotein;Referenceproteome;Repeat;Repressor;Transcription;Transcriptionregulation;Ublconjugation	Kaiso-NCOR complex;NCOR complex;NCOR1 complex;NCOR2 complex;NCOR-HDAC3 complex;SKI-NCOR1-SIN3A-HDAC1 complex;SMAD2-SKI-NCOR complex;SMAD3-SKI-NCOR complex;SMAD4-SKI-NCOR complex	ERK1,2 kinase substrate motif;GSK-3, ERK1, ERK2, CDK5 substrate motif;PKA kinase substrate motif;WW domain binding motif	+	CST;HTP	0.999998	4.66113e-08	90.819	80.678	90.819	-0.4763	110430000	68334000	42091000	1472	58.4896
-0.211858	0.777899	0.101308	0.1539	0.314678	0.242449	-0.231873	0.473686	-0.292953	0.593807	0.345513	0.325151	0.173822	0.388721	0.636475	1.07998	0.376708	0.306412	0.0468468	0.1539	0.376708	0.222808	0.228883	S	2	___1	alpha-beta T cell activation;alpha-beta T cell differentiation;anatomical structure development;biological regulation;biosynthetic process;CD4-positive, alpha-beta T cell activation;CD4-positive, alpha-beta T cell differentiation;CD4-positive, CD25-positive, alpha-beta regulatory T cell differentiation;cell activation;cell differentiation;cell surface receptor linked signaling pathway;cellular bi…	activating transcription factor binding;binding;chromatin binding;DNA binding;enzyme binding;enzyme regulator activity;histone deacetylase binding;histone deacetylase regulator activity;hormone receptor binding;nuclear hormone receptor binding;nucleic acid binding;nucleic acid binding transcription factor activity;protein binding;protein binding transcription factor activity;receptor binding;regu…	cell part;chromatin;chromosomal part;cytoplasm;cytoskeletal part;intracellular membrane-bounded organelle;intracellular organelle;intracellular organelle part;intracellular part;macromolecular complex;membrane;membrane-bounded organelle;microtubule;nuclear chromatin;nuclear chromosome part;nuclear part;nucleoplasm;nucleoplasm part;nucleus;organelle;organelle part;protein complex;spindle microtubu…	anatomical structure development;biological regulation;biosynthetic process;cell activation;cell differentiation;cellular component assembly;cellular component organization;cellular lipid metabolic process;cellular metabolic process;cellular nitrogen compound metabolic process;cellular process;chromatin modification;chromatin organization;chromosome organization;cytoskeleton organization;developm…	cell part;cytoplasm;intracellular membrane-bounded organelle;intracellular organelle;macromolecular complex;membrane;nucleoplasm;nucleus;organelle;protein complex;transcription factor complex;transcriptional repressor complex		Myb_DNA-binding	BENPORATH_NANOG_TARGETS;BIOCARTA_PPARA_PATHWAY;BIOCARTA_VDR_PATHWAY;BIOPOLYMER_METABOLIC_PROCESS;CAGGTG_V$E12_Q6;chr17p11;CTAWWWATA_V$RSRFC4_Q2;CUI_TCF21_TARGETS_2_DN;DE_YY1_TARGETS_DN;DELACROIX_RAR_BOUND_ES;DIAZ_CHRONIC_MEYLOGENOUS_LEUKEMIA_UP;GAZDA_DIAMOND_BLACKFAN_ANEMIA_ERYTHROID_DN;GGGAGGRR_V$MAZ_Q6;GOBERT_OLIGODENDROCYTE_DIFFERENTIATION_DN;GRAESSMANN_APOPTOSIS_BY_DOXORUBICIN_DN;GSE11864_UNT…	3D-structure;Acetylation;Alternativesplicing;Chromatinregulator;Coiledcoil;Completeproteome;DNA-binding;Nucleus;Phosphoprotein;Referenceproteome;Repeat;Repressor;Transcription;Transcriptionregulation;Ublconjugation	Kaiso-NCOR complex;NCOR complex;NCOR1 complex;NCOR2 complex;NCOR-HDAC3 complex;SKI-NCOR1-SIN3A-HDAC1 complex;SMAD2-SKI-NCOR complex;SMAD3-SKI-NCOR complex;SMAD4-SKI-NCOR complex	Casein kinase I substrate motif;Casein kinase II substrate motif;ERK1,2 kinase substrate motif;Growth associated histone HI kinase substrate motif;GSK-3, ERK1, ERK2, CDK5 substrate motif;WW domain binding motif	+	CST;HTP	0.999971	8.20377e-74	221.85	211.43	221.85	0.0019046	271950000	194410000	77543000	2184	45.3614
NaN	NaN	NaN	1.1395	0.958822	1.2609	0.878534	NaN	1.43067	1.2916	NaN	0.708107	0.762247	NaN	1.91817	1.92951	1.13444	1.19042	0.516609	1.1395	1.19042	0.0509248	0.38842	S	4	___1	alpha-beta T cell activation;alpha-beta T cell differentiation;anatomical structure development;biological regulation;biosynthetic process;CD4-positive, alpha-beta T cell activation;CD4-positive, alpha-beta T cell differentiation;CD4-positive, CD25-positive, alpha-beta regulatory T cell differentiation;cell activation;cell differentiation;cell surface receptor linked signaling pathway;cellular bi…	activating transcription factor binding;binding;chromatin binding;DNA binding;enzyme binding;enzyme regulator activity;histone deacetylase binding;histone deacetylase regulator activity;hormone receptor binding;nuclear hormone receptor binding;nucleic acid binding;nucleic acid binding transcription factor activity;protein binding;protein binding transcription factor activity;receptor binding;regu…	cell part;chromatin;chromosomal part;cytoplasm;cytoskeletal part;intracellular membrane-bounded organelle;intracellular organelle;intracellular organelle part;intracellular part;macromolecular complex;membrane;membrane-bounded organelle;microtubule;nuclear chromatin;nuclear chromosome part;nuclear part;nucleoplasm;nucleoplasm part;nucleus;organelle;organelle part;protein complex;spindle microtubu…	anatomical structure development;biological regulation;biosynthetic process;cell activation;cell differentiation;cellular component assembly;cellular component organization;cellular lipid metabolic process;cellular metabolic process;cellular nitrogen compound metabolic process;cellular process;chromatin modification;chromatin organization;chromosome organization;cytoskeleton organization;developm…	cell part;cytoplasm;intracellular membrane-bounded organelle;intracellular organelle;macromolecular complex;membrane;nucleoplasm;nucleus;organelle;protein complex;transcription factor complex;transcriptional repressor complex		Myb_DNA-binding	BENPORATH_NANOG_TARGETS;BIOCARTA_PPARA_PATHWAY;BIOCARTA_VDR_PATHWAY;BIOPOLYMER_METABOLIC_PROCESS;CAGGTG_V$E12_Q6;chr17p11;CTAWWWATA_V$RSRFC4_Q2;CUI_TCF21_TARGETS_2_DN;DE_YY1_TARGETS_DN;DELACROIX_RAR_BOUND_ES;DIAZ_CHRONIC_MEYLOGENOUS_LEUKEMIA_UP;GAZDA_DIAMOND_BLACKFAN_ANEMIA_ERYTHROID_DN;GGGAGGRR_V$MAZ_Q6;GOBERT_OLIGODENDROCYTE_DIFFERENTIATION_DN;GRAESSMANN_APOPTOSIS_BY_DOXORUBICIN_DN;GSE11864_UNT…	3D-structure;Acetylation;Alternativesplicing;Chromatinregulator;Coiledcoil;Completeproteome;DNA-binding;Nucleus;Phosphoprotein;Referenceproteome;Repeat;Repressor;Transcription;Transcriptionregulation;Ublconjugation	Kaiso-NCOR complex;NCOR complex;NCOR1 complex;NCOR2 complex;NCOR-HDAC3 complex;SKI-NCOR1-SIN3A-HDAC1 complex;SMAD2-SKI-NCOR complex;SMAD3-SKI-NCOR complex;SMAD4-SKI-NCOR complex	14-3-3 domain binding motif;Calmodulin-dependent protein kinase II substrate motif;Casein kinase II substrate motif;PAK2 kinase substrate motif;PKA kinase substrate motif;PKC epsilon kinase substrate motif;PKC kinase substrate motif	+	CST;HTP;LTP	0.835362	1.90902e-127	228.84	228.84	118.97	-0.306	447740000	378680000	69062000	88	7.14713
-0.786556	0.000866172	0.29157	0.45969	NaN	-0.312506	-0.556608	NaN	-0.102257	-0.233645	NaN	0.412214	-0.697059	NaN	0.236983	0.435999	NaN	NaN	0.543455	-0.102257	0.236983	0.33924	0.146053	S	4	___1	alpha-beta T cell activation;alpha-beta T cell differentiation;anatomical structure development;biological regulation;biosynthetic process;CD4-positive, alpha-beta T cell activation;CD4-positive, alpha-beta T cell differentiation;CD4-positive, CD25-positive, alpha-beta regulatory T cell differentiation;cell activation;cell differentiation;cell surface receptor linked signaling pathway;cellular bi…	activating transcription factor binding;binding;chromatin binding;DNA binding;enzyme binding;enzyme regulator activity;histone deacetylase binding;histone deacetylase regulator activity;hormone receptor binding;nuclear hormone receptor binding;nucleic acid binding;nucleic acid binding transcription factor activity;protein binding;protein binding transcription factor activity;receptor binding;regu…	cell part;chromatin;chromosomal part;cytoplasm;cytoskeletal part;intracellular membrane-bounded organelle;intracellular organelle;intracellular organelle part;intracellular part;macromolecular complex;membrane;membrane-bounded organelle;microtubule;nuclear chromatin;nuclear chromosome part;nuclear part;nucleoplasm;nucleoplasm part;nucleus;organelle;organelle part;protein complex;spindle microtubu…	anatomical structure development;biological regulation;biosynthetic process;cell activation;cell differentiation;cellular component assembly;cellular component organization;cellular lipid metabolic process;cellular metabolic process;cellular nitrogen compound metabolic process;cellular process;chromatin modification;chromatin organization;chromosome organization;cytoskeleton organization;developm…	cell part;cytoplasm;intracellular membrane-bounded organelle;intracellular organelle;macromolecular complex;membrane;nucleoplasm;nucleus;organelle;protein complex;transcription factor complex;transcriptional repressor complex		Myb_DNA-binding	BENPORATH_NANOG_TARGETS;BIOCARTA_PPARA_PATHWAY;BIOCARTA_VDR_PATHWAY;BIOPOLYMER_METABOLIC_PROCESS;CAGGTG_V$E12_Q6;chr17p11;CTAWWWATA_V$RSRFC4_Q2;CUI_TCF21_TARGETS_2_DN;DE_YY1_TARGETS_DN;DELACROIX_RAR_BOUND_ES;DIAZ_CHRONIC_MEYLOGENOUS_LEUKEMIA_UP;GAZDA_DIAMOND_BLACKFAN_ANEMIA_ERYTHROID_DN;GGGAGGRR_V$MAZ_Q6;GOBERT_OLIGODENDROCYTE_DIFFERENTIATION_DN;GRAESSMANN_APOPTOSIS_BY_DOXORUBICIN_DN;GSE11864_UNT…	3D-structure;Acetylation;Alternativesplicing;Chromatinregulator;Coiledcoil;Completeproteome;DNA-binding;Nucleus;Phosphoprotein;Referenceproteome;Repeat;Repressor;Transcription;Transcriptionregulation;Ublconjugation	Kaiso-NCOR complex;NCOR complex;NCOR1 complex;NCOR2 complex;NCOR-HDAC3 complex;SKI-NCOR1-SIN3A-HDAC1 complex;SMAD2-SKI-NCOR complex;SMAD3-SKI-NCOR complex;SMAD4-SKI-NCOR complex	Casein kinase II substrate motif;ERK1,2 kinase substrate motif;GSK-3, ERK1, ERK2, CDK5 substrate motif;MAPKAPK2 kinase substrate motif;PKA kinase substrate motif;PKC kinase substrate motif;WW domain binding motif	+	CST	0.985296	1.28014e-22	114.68	94.475	114.68	-0.17305	182030000	122890000	59139000	2102	18.3257
-0.565087	0.164904	-0.375896	-0.327391	-0.313374	0.346566	-0.173273	0.0765915	-0.11241	-0.415062	0.0274259	-0.132856	-0.182412	-0.197535	-0.024854	0.0713619	0.101499	-0.168102	0.726287	-0.173273	-0.132856	0.0404171	0.399217	S	2	___1	alpha-beta T cell activation;alpha-beta T cell differentiation;anatomical structure development;biological regulation;biosynthetic process;CD4-positive, alpha-beta T cell activation;CD4-positive, alpha-beta T cell differentiation;CD4-positive, CD25-positive, alpha-beta regulatory T cell differentiation;cell activation;cell differentiation;cell surface receptor linked signaling pathway;cellular bi…	activating transcription factor binding;binding;chromatin binding;DNA binding;enzyme binding;enzyme regulator activity;histone deacetylase binding;histone deacetylase regulator activity;hormone receptor binding;nuclear hormone receptor binding;nucleic acid binding;nucleic acid binding transcription factor activity;protein binding;protein binding transcription factor activity;receptor binding;regu…	cell part;chromatin;chromosomal part;cytoplasm;cytoskeletal part;intracellular membrane-bounded organelle;intracellular organelle;intracellular organelle part;intracellular part;macromolecular complex;membrane;membrane-bounded organelle;microtubule;nuclear chromatin;nuclear chromosome part;nuclear part;nucleoplasm;nucleoplasm part;nucleus;organelle;organelle part;protein complex;spindle microtubu…	anatomical structure development;biological regulation;biosynthetic process;cell activation;cell differentiation;cellular component assembly;cellular component organization;cellular lipid metabolic process;cellular metabolic process;cellular nitrogen compound metabolic process;cellular process;chromatin modification;chromatin organization;chromosome organization;cytoskeleton organization;developm…	cell part;cytoplasm;intracellular membrane-bounded organelle;intracellular organelle;macromolecular complex;membrane;nucleoplasm;nucleus;organelle;protein complex;transcription factor complex;transcriptional repressor complex		Myb_DNA-binding	BENPORATH_NANOG_TARGETS;BIOCARTA_PPARA_PATHWAY;BIOCARTA_VDR_PATHWAY;BIOPOLYMER_METABOLIC_PROCESS;CAGGTG_V$E12_Q6;chr17p11;CTAWWWATA_V$RSRFC4_Q2;CUI_TCF21_TARGETS_2_DN;DE_YY1_TARGETS_DN;DELACROIX_RAR_BOUND_ES;DIAZ_CHRONIC_MEYLOGENOUS_LEUKEMIA_UP;GAZDA_DIAMOND_BLACKFAN_ANEMIA_ERYTHROID_DN;GGGAGGRR_V$MAZ_Q6;GOBERT_OLIGODENDROCYTE_DIFFERENTIATION_DN;GRAESSMANN_APOPTOSIS_BY_DOXORUBICIN_DN;GSE11864_UNT…	3D-structure;Acetylation;Alternativesplicing;Chromatinregulator;Coiledcoil;Completeproteome;DNA-binding;Nucleus;Phosphoprotein;Referenceproteome;Repeat;Repressor;Transcription;Transcriptionregulation;Ublconjugation	Kaiso-NCOR complex;NCOR complex;NCOR1 complex;NCOR2 complex;NCOR-HDAC3 complex;SKI-NCOR1-SIN3A-HDAC1 complex;SMAD2-SKI-NCOR complex;SMAD3-SKI-NCOR complex;SMAD4-SKI-NCOR complex	Casein kinase II substrate motif;ERK1,2 kinase substrate motif;GSK-3, ERK1, ERK2, CDK5 substrate motif;PKA kinase substrate motif;PKC kinase substrate motif;WW domain binding motif	+	CST;HTP	1	5.57021e-05	92.19	81.48	73.36	0.66021	475900000	305620000	170270000	2120	73.3597
-0.654776	0.0194867	NaN	0.787849	-1.22041	-0.319478	-0.164455	NaN	-1.3137	-0.0842234	NaN	-0.409701	-0.118777	0.567056	0.882453	0.0499614	-0.0706568	-0.427458	0.184245	-0.319478	-0.0774401	0.242038	0.213629	S	4	___1	anatomical structure morphogenesis;autophagic vacuole assembly;axon extension;biological regulation;cell communication;cell differentiation;cell differentiation in hindbrain;cell growth;cell migration;cell migration in hindbrain;cell motility;cell part morphogenesis;cell projection morphogenesis;cell projection organization;cellular component assembly;cellular component assembly at cellular level…	adenyl nucleotide binding;adenyl ribonucleotide binding;ATP binding;binding;catalytic activity;enzyme binding;GTPase binding;kinase activity;nucleotide binding;phosphotransferase activity, alcohol group as acceptor;protein binding;protein complex binding;protein kinase activity;protein serine/threonine kinase activity;purine nucleotide binding;purine ribonucleoside triphosphate binding;purine rib…	Atg1p signaling complex;autophagic vacuole;cell body;cell part;cell projection;cytoplasm;cytoplasmic part;cytoplasmic vesicle membrane;cytoplasmic vesicle part;cytosol;intracellular membrane-bounded organelle;intracellular organelle;intracellular organelle part;intracellular part;macromolecular complex;membrane;membrane-bounded organelle;neuron projection;neuronal cell body;organelle;organelle me…	anatomical structure morphogenesis;biological regulation;cell communication;cell differentiation;cell growth;cell motility;cellular component assembly;cellular component morphogenesis;cellular component movement;cellular component organization;cellular membrane organization;cellular metabolic process;cellular process;developmental process;endocytosis;establishment of localization;growth;localizat…	cell body;cell part;cell projection;cytoplasm;cytosol;intracellular membrane-bounded organelle;intracellular organelle;macromolecular complex;membrane;neuron projection;neuronal cell body;organelle;protein complex;vacuole	mTOR signaling pathway;Regulation of autophagy	DUF3543;Pkinase	ACEVEDO_LIVER_CANCER_WITH_H3K27ME3_DN;ACTTTAT,MIR-142-5P;AGCACTT,MIR-93,MIR-302A,MIR-302B,MIR-302C,MIR-302D,MIR-372,MIR-373,MIR-520E,MIR-520A,MIR-526B,MIR-520B,MIR-520C,MIR-520D;BAKKER_FOXO3_TARGETS_UP;BIOPOLYMER_METABOLIC_PROCESS;BIOPOLYMER_MODIFICATION;BRACHAT_RESPONSE_TO_CAMPTOTHECIN_UP;BRUINS_UVC_RESPONSE_MIDDLE;BRUINS_UVC_RESPONSE_VIA_TP53_GROUP_B;BUYTAERT_PHOTODYNAMIC_THERAPY_STRESS_UP;CACT…	3D-structure;ATP-binding;Autophagy;Completeproteome;Cytoplasm;Kinase;Nucleotide-binding;Phosphoprotein;Polymorphism;Referenceproteome;Serine/threonine-proteinkinase;Transferase		14-3-3 domain binding motif;Calmodulin-dependent protein kinase II substrate motif;PKA kinase substrate motif;PKC kinase substrate motif	+	CST;HTP;LTP	1	1.38155e-13	95.205	93.063	94.281	-0.21822	63201000	38069000	25132000	556	67.9896
-0.412013	1.40066	1.08027	1.20848	NaN	3.12118	NaN	2.21326	-0.413945	-0.0618249	2.24085	-0.331736	1.10414	0.223071	NaN	0.446379	NaN	NaN	0.38008	1.20848	0.334725	-0.873759	0.0118819	S	2	___1	biological regulation;cellular process;ER to Golgi vesicle-mediated transport;establishment of localization;establishment of localization in cell;establishment of protein localization;Golgi vesicle transport;intracellular transport;positive regulation of biological process;positive regulation of catabolic process;positive regulation of macromolecule metabolic process;positive regulation of metabo…		cell part;cytoplasmic membrane-bounded vesicle;cytoplasmic part;cytoplasmic vesicle;endoplasmic reticulum membrane;endoplasmic reticulum part;endoplasmic reticulum-Golgi intermediate compartment;endoplasmic reticulum-Golgi intermediate compartment membrane;Golgi apparatus part;Golgi membrane;integral to membrane;intracellular membrane-bounded organelle;intracellular organelle;intracellular organe…	biological regulation;cellular process;establishment of localization;Golgi vesicle transport;protein transport;regulation of organelle organization;transport;vesicle-mediated transport	cell part;cytoplasmic membrane-bounded vesicle;intracellular membrane-bounded organelle;intracellular organelle;membrane;organelle;vesicle	Phagosome;SNARE interactions in vesicular transport	Longin;Synaptobrevin	ACATTCC,MIR-1,MIR-206;BENPORATH_NANOG_TARGETS;BERENJENO_TRANSFORMED_BY_RHOA_DN;CELLULAR_LOCALIZATION;CHEOK_RESPONSE_TO_HD_MTX_DN;chr1q21;CREIGHTON_ENDOCRINE_THERAPY_RESISTANCE_5;ER_TO_GOLGI_VESICLE_MEDIATED_TRANSPORT;ESTABLISHMENT_OF_CELLULAR_LOCALIZATION;ESTABLISHMENT_OF_LOCALIZATION;FLECHNER_BIOPSY_KIDNEY_TRANSPLANT_OK_VS_DONOR_UP;GINESTIER_BREAST_CANCER_ZNF217_AMPLIFIED_UP;GOLGI_VESICLE_TRANSP…	3D-structure;Acetylation;Coiledcoil;Completeproteome;Directproteinsequencing;Endoplasmicreticulum;ER-Golgitransport;Golgiapparatus;Membrane;Phosphoprotein;Polymorphism;Proteintransport;Referenceproteome;Transmembrane;Transmembranehelix;Transport		Casein kinase II substrate motif;PKA kinase substrate motif;PKC kinase substrate motif	+	HTP	0.951782	0.00103837	82.069	82.069	62.081	0.80882	125870000	96158000	29712000	177	14.4596
0.550051	0.72712	1.11637	0.565349	-0.681396	-0.745991	-0.791096	0.905703	1.23913	-0.709121	1.11339	1.51469	0.0505632	1.37128	0.497873	-0.088906	0.691696	-0.425466	0.746633	0.565349	0.497873	-0.0674762	0.486469	S	2	___1	biological regulation;cellular process;ER to Golgi vesicle-mediated transport;establishment of localization;establishment of localization in cell;establishment of protein localization;Golgi vesicle transport;intracellular transport;positive regulation of biological process;positive regulation of catabolic process;positive regulation of macromolecule metabolic process;positive regulation of metabo…		cell part;cytoplasmic membrane-bounded vesicle;cytoplasmic part;cytoplasmic vesicle;endoplasmic reticulum membrane;endoplasmic reticulum part;endoplasmic reticulum-Golgi intermediate compartment;endoplasmic reticulum-Golgi intermediate compartment membrane;Golgi apparatus part;Golgi membrane;integral to membrane;intracellular membrane-bounded organelle;intracellular organelle;intracellular organe…	biological regulation;cellular process;establishment of localization;Golgi vesicle transport;protein transport;regulation of organelle organization;transport;vesicle-mediated transport	cell part;cytoplasmic membrane-bounded vesicle;intracellular membrane-bounded organelle;intracellular organelle;membrane;organelle;vesicle	Phagosome;SNARE interactions in vesicular transport	Longin;Synaptobrevin	ACATTCC,MIR-1,MIR-206;BENPORATH_NANOG_TARGETS;BERENJENO_TRANSFORMED_BY_RHOA_DN;CELLULAR_LOCALIZATION;CHEOK_RESPONSE_TO_HD_MTX_DN;chr1q21;CREIGHTON_ENDOCRINE_THERAPY_RESISTANCE_5;ER_TO_GOLGI_VESICLE_MEDIATED_TRANSPORT;ESTABLISHMENT_OF_CELLULAR_LOCALIZATION;ESTABLISHMENT_OF_LOCALIZATION;FLECHNER_BIOPSY_KIDNEY_TRANSPLANT_OK_VS_DONOR_UP;GINESTIER_BREAST_CANCER_ZNF217_AMPLIFIED_UP;GOLGI_VESICLE_TRANSP…	3D-structure;Acetylation;Coiledcoil;Completeproteome;Directproteinsequencing;Endoplasmicreticulum;ER-Golgitransport;Golgiapparatus;Membrane;Phosphoprotein;Polymorphism;Proteintransport;Referenceproteome;Transmembrane;Transmembranehelix;Transport		Casein kinase II substrate motif	+	CST;HTP	1	6.00775e-135	269.92	196.08	177.44	0.19692	692830000	507710000	185120000	137	79.7554
-0.959924	-0.00849251	0.228535	0.201296	-0.504793	-0.452863	NaN	0.469653	-0.512904	-0.0677832	0.0369153	-0.106383	-0.510237	-0.235918	0.438415	-0.0795367	0.336994	NaN	0.421295	-0.230678	-0.0736599	0.157018	0.285422	S	2	___1	biological regulation;cell surface receptor linked signaling pathway;cellular process;cellular response to stimulus;enzyme linked receptor protein signaling pathway;insulin-like growth factor receptor signaling pathway;regulation of biological process;regulation of cellular process;response to stimulus;signal transduction;transmembrane receptor protein tyrosine kinase signaling pathway			biological regulation;cellular process;response to stimulus;signal transduction			GYF	AGCACTT,MIR-93,MIR-302A,MIR-302B,MIR-302C,MIR-302D,MIR-372,MIR-373,MIR-520E,MIR-520A,MIR-526B,MIR-520B,MIR-520C,MIR-520D;AGGCACT,MIR-515-3P;CAGCACT,MIR-512-3P;chr7q22;GCACCTT,MIR-18A,MIR-18B;GCACTTT,MIR-17-5P,MIR-20A,MIR-106A,MIR-106B,MIR-20B,MIR-519D;GCM_DDX11;GCM_SMO;GCM_USP6;GGCACTT,MIR-519E;GGGTGGRR_V$PAX4_03;GINESTIER_BREAST_CANCER_ZNF217_AMPLIFIED_DN;GRADE_COLON_CANCER_UP;GSE13493_DP_VS_CD4…	Completeproteome;Phosphoprotein;Referenceproteome		14-3-3 domain binding motif;Calmodulin-dependent protein kinase II alpha substrate motif;Calmodulin-dependent protein kinase II substrate motif;Calmodulin-dependent protein kinase IV substrate motif;Casein kinase II substrate motif;Chk1 kinase substrate motif;G protein-coupled receptor kinase 1 substrate motif;GSK3 kinase substrate motif;MAPKAPK2 kinase substrate motif;Phosphorylase kinase substr…	+	CST;HTP	0.999683	5.22751e-05	93.166	80.13	93.166	-0.12105	156320000	98158000	58163000	638	34.9943
-1.36061	1.33553	1.63761	1.82432	0.678817	1.42877	1.21119	2.1925	NaN	0.486364	1.86022	2.00541	0.819027	NaN	1.17212	1.15606	1.52906	NaN	0.704402	1.38215	1.17212	-0.210029	0.334449	S	3	___1	anatomical structure development;developmental process;nervous system development;system development		cell part;intracellular organelle part;intracellular part;nuclear body;nuclear part;nucleoplasm part;organelle part;PML body	anatomical structure development;developmental process	cell part		CH;LRR_1;LRR_8	AAAGACA,MIR-511;ACCAAAG,MIR-9;AMUNDSON_POOR_SURVIVAL_AFTER_GAMMA_RADIATION_8G;ANATOMICAL_STRUCTURE_DEVELOPMENT;BANDRES_RESPONSE_TO_CARMUSTIN_WITHOUT_MGMT_48HR_DN;BLALOCK_ALZHEIMERS_DISEASE_UP;CAGCTG_V$AP4_Q5;CAGGTG_V$E12_Q6;CCAGGGG,MIR-331;CGCTGCT,MIR-503;chr7q22;DEURIG_T_CELL_PROLYMPHOCYTIC_LEUKEMIA_UP;ENGELMANN_CANCER_PROGENITORS_DN;FOSTER_KDM1A_TARGETS_DN;GAGCCAG,MIR-149;GATTGGY_V$NFY_Q6_01;GG…	Completeproteome;Leucine-richrepeat;Phosphoprotein;Polymorphism;Referenceproteome;Repeat		14-3-3 domain binding motif;b-Adrenergic Receptor kinase substrate motif;Calmodulin-dependent protein kinase II substrate motif;G protein-coupled receptor kinase 1 substrate motif;Phosphorylase kinase substrate motif;PKA kinase substrate motif;PKC epsilon kinase substrate motif;PKC kinase substrate motif	+	HTP	1	5.26159e-05	98.406	87.147	91.292	0.24359	244000000	200430000	43571000	432	91.2916
-0.820566	0.373895	-0.0149525	0.576753	-0.414734	0.00324514	-0.478346	0.168009	NaN	-0.493405	0.484199	0.907363	-1.06671	NaN	0.393444	0.13474	0.17655	-1.46694	0.905393	-0.0058537	0.155645	0.161499	0.28137	S	3	___1	anatomical structure development;developmental process;nervous system development;system development		cell part;intracellular organelle part;intracellular part;nuclear body;nuclear part;nucleoplasm part;organelle part;PML body	anatomical structure development;developmental process	cell part		CH;LRR_1;LRR_8	AAAGACA,MIR-511;ACCAAAG,MIR-9;AMUNDSON_POOR_SURVIVAL_AFTER_GAMMA_RADIATION_8G;ANATOMICAL_STRUCTURE_DEVELOPMENT;BANDRES_RESPONSE_TO_CARMUSTIN_WITHOUT_MGMT_48HR_DN;BLALOCK_ALZHEIMERS_DISEASE_UP;CAGCTG_V$AP4_Q5;CAGGTG_V$E12_Q6;CCAGGGG,MIR-331;CGCTGCT,MIR-503;chr7q22;DEURIG_T_CELL_PROLYMPHOCYTIC_LEUKEMIA_UP;ENGELMANN_CANCER_PROGENITORS_DN;FOSTER_KDM1A_TARGETS_DN;GAGCCAG,MIR-149;GATTGGY_V$NFY_Q6_01;GG…	Completeproteome;Leucine-richrepeat;Phosphoprotein;Polymorphism;Referenceproteome;Repeat		14-3-3 domain binding motif;ATM kinase substrate motif;Calmodulin-dependent protein kinase II substrate motif;Calmodulin-dependent protein kinase IV substrate motif;Casein kinase II substrate motif;Chk1 kinase substrate motif;DNA dependent Protein kinase substrate motif;G protein-coupled receptor kinase 1 substrate motif;GSK3 kinase substrate motif;MDC1 BRCT domain binding motif;PKA kinase substr…	+	CST;HTP	0.998656	1.30429e-98	216.87	210.56	129.77	0.25186	1892300000	1296600000	595680000	513	33.7541
0.0740751	0.25146	NaN	-1.00777	0.394967	-0.216389	-0.482866	NaN	NaN	-0.0811225	NaN	NaN	-0.765876	-1.41043	-0.0586091	-0.62564	NaN	NaN	0.230731	-0.071157	-0.62564	-0.554483	0.0839375	S	4	___1	biological regulation;biosynthetic process;cell differentiation;cellular biosynthetic process;cellular component organization;cellular component organization at cellular level;cellular component organization or biogenesis;cellular component organization or biogenesis at cellular level;cellular developmental process;cellular macromolecule biosynthetic process;cellular macromolecule metabolic proce…	binding;cation binding;DNA binding;ion binding;metal ion binding;nucleic acid binding;protein binding transcription factor activity;transcription cofactor activity;transcription corepressor activity;transcription factor binding transcription factor activity	cell part;chromatin remodeling complex;histone deacetylase complex;intracellular organelle part;intracellular part;macromolecular complex;nuclear part;nucleoplasm;nucleoplasm part;organelle part;protein complex	biological regulation;biosynthetic process;cell differentiation;cellular component organization;cellular metabolic process;cellular nitrogen compound metabolic process;cellular process;chromatin organization;chromosome organization;developmental process;macromolecule metabolic process;metabolic process;nitrogen compound metabolic process;nucleobase-containing compound metabolic process;organelle …	cell part;chromatin remodeling complex;macromolecular complex;nucleoplasm;protein complex		SAP30_Sin3_bdg;zf-SAP30	AACTTT_UNKNOWN;AACYNNNNTTCCS_UNKNOWN;ALTEMEIER_RESPONSE_TO_LPS_WITH_MECHANICAL_VENTILATION;BENPORATH_CYCLING_GENES;BENPORATH_ES_CORE_NINE_CORRELATED;BENPORATH_MYC_MAX_TARGETS;BENPORATH_SOX2_TARGETS;BERENJENO_TRANSFORMED_BY_RHOA_UP;BLALOCK_ALZHEIMERS_DISEASE_UP;BORCZUK_MALIGNANT_MESOTHELIOMA_UP;BROWNE_HCMV_INFECTION_16HR_UP;BROWNE_HCMV_INFECTION_48HR_UP;BRUINS_UVC_RESPONSE_MIDDLE;CASORELLI_ACUTE_P…	3D-structure;Completeproteome;DNA-binding;Metal-binding;Nucleus;Phosphoprotein;Referenceproteome;Repressor;Transcription;Transcriptionregulation;Zinc;Zinc-finger	ALL-1 supercomplex;BRMS1-SIN3-HDAC complex;HCF-1 complex;ING2 complex;NCOR2 complex;SAP complex (Sin3-associated protein complex);Sin3 complex;SIN3 complex;SIN3-HDAC-SAP30-ARID4 complex;SIN3-ING1b complex I;SIN3-ING1b complex II;SIN3-SAP25 complex	14-3-3 domain binding motif;Akt kinase substrate motif;Calmodulin-dependent protein kinase II substrate motif;Casein kinase II substrate motif;MAPKAPK1 kinase substrate motif;Pim1 kinase substrate sequence;PKA kinase substrate motif;PKA, PKG kinase substrate motif;PKC epsilon kinase substrate motif;PKC kinase substrate motif;PKG kinase substrate motif;Pyruvate dehydrogenase kinase substrate motif	+	CST;HTP	1	8.39566e-115	206.52	206.52	184.67	0.078754	2795700000	1882900000	912760000	131	87.4241
-0.159636	NaN	NaN	-0.109673	NaN	0.27323	0.391536	0.0267129	NaN	NaN	NaN	0.173765	NaN	0.416208	0.854438	-0.172408	0.27199	0.137215	0.295788	0.0267129	0.222877	0.196164	0.250994	S	3	___1	biological regulation;cell cycle phase;cell cycle process;cell division;cell migration;cell motility;cellular component movement;cellular component organization;cellular component organization at cellular level;cellular component organization or biogenesis;cellular component organization or biogenesis at cellular level;cellular process;cytoplasmic microtubule organization;cytoskeleton organizatio…	adenyl nucleotide binding;adenyl ribonucleotide binding;ATP binding;ATPase activity;ATPase activity, coupled;binding;catalytic activity;cytoskeletal protein binding;hydrolase activity;hydrolase activity, acting on acid anhydrides;hydrolase activity, acting on acid anhydrides, in phosphorus-containing anhydrides;microtubule binding;microtubule-severing ATPase activity;nucleoside-triphosphatase act…	axon;cell body;cell part;cell projection;cell projection part;centrosome;cytoplasm;cytoplasmic part;cytoskeletal part;growth cone;intracellular membrane-bounded organelle;intracellular non-membrane-bounded organelle;intracellular organelle;intracellular organelle part;intracellular part;lipid particle;macromolecular complex;membrane;membrane-bounded organelle;microtubule;microtubule organizing ce…	biological regulation;cell division;cell motility;cellular component movement;cellular component organization;cellular process;cytoskeleton organization;localization;locomotion;metabolic process;mitosis;nuclear division;organelle fission;organelle organization	cell body;cell part;cell projection;centrosome;cytoplasm;intracellular membrane-bounded organelle;intracellular non-membrane-bounded organelle;intracellular organelle;lipid particle;macromolecular complex;membrane;microtubule organizing center;midbody;neuron projection;neuronal cell body;nucleoplasm;nucleus;organelle;plasma membrane;protein complex;site of polarized growth		AAA;Vps4_C	ATPASE_ACTIVITY;ATPASE_ACTIVITY_COUPLED;BENPORATH_CYCLING_GENES;BROWNE_HCMV_INFECTION_18HR_UP;CELL_CYCLE_GO_0007049;CELL_CYCLE_PHASE;CELL_CYCLE_PROCESS;chr6q24;CYTOSKELETAL_PART;CYTOSKELETAL_PROTEIN_BINDING;CYTOSKELETON;DIAZ_CHRONIC_MEYLOGENOUS_LEUKEMIA_UP;ENK_UV_RESPONSE_EPIDERMIS_DN;FOSTER_TOLERANT_MACROPHAGE_DN;GSE14000_TRANSLATED_RNA_VS_MRNA_4H_LPS_DC_UP;GSE14308_TH1_VS_INDUCED_TREG_UP;GSE147…	Alternativesplicing;ATP-binding;Cellcycle;Celldivision;Completeproteome;Cytoplasm;Cytoskeleton;Hydrolase;Microtubule;Mitosis;Nucleotide-binding;Phosphoprotein;Referenceproteome;Ublconjugation		ERK1,2 kinase substrate motif;Growth associated histone HI kinase substrate motif;GSK-3, ERK1, ERK2, CDK5 substrate motif;PKA kinase substrate motif;PKC kinase substrate motif;WW domain binding motif	+	HTP	0.999806	2.38978e-05	58.427	56.616	52.481	0.34163	37678000	23143000	14535000	170	37.5121
1.08374	1.8385	NaN	0.997368	1.37748	NaN	NaN	-0.726497	NaN	1.43979	1.28842	1.05001	0.545415	0.918096	0.699336	1.50711	1.63182	1.05577	0.660675	1.08374	1.05577	-0.027972	0.471019	S	3	___1	biological regulation;biosynthetic process;cellular biosynthetic process;cellular component assembly;cellular component assembly at cellular level;cellular component organization;cellular component organization at cellular level;cellular component organization or biogenesis;cellular component organization or biogenesis at cellular level;cellular macromolecular complex assembly;cellular macromolec…	activating transcription factor binding;binding;chromatin binding;DNA binding;nucleic acid binding;protein binding;protein binding transcription factor activity;RNA polymerase II transcription coactivator activity;RNA polymerase II transcription cofactor activity;RNA polymerase II transcription factor binding transcription factor activity;RNA polymerase II transcription factor binding transcripti…	cell part;chromatin;chromosomal part;cytoplasmic part;cytosol;heterochromatin;intracellular membrane-bounded organelle;intracellular organelle;intracellular organelle part;intracellular part;membrane-bounded organelle;nuclear chromatin;nuclear chromosome part;nuclear heterochromatin;nuclear part;nuclear periphery;nucleoplasm;nucleus;organelle;organelle part;transcriptionally active chromatin	biological regulation;biosynthetic process;cellular component assembly;cellular component organization;cellular macromolecular complex assembly;cellular metabolic process;cellular nitrogen compound metabolic process;cellular process;macromolecular complex assembly;macromolecule metabolic process;metabolic process;nitrogen compound metabolic process;nucleobase-containing compound metabolic process…	cell part;cytosol;intracellular membrane-bounded organelle;intracellular organelle;nucleoplasm;nucleus;organelle		LEDGF;PWWP	AAGCCAT,MIR-135A,MIR-135B;ACACTAC,MIR-142-3P;ACTGAAA,MIR-30A-3P,MIR-30E-3P;AGCATTA,MIR-155;AGUIRRE_PANCREATIC_CANCER_COPY_NUMBER_DN;BENPORATH_ES_1;BHATTACHARYA_EMBRYONIC_STEM_CELL;BILD_E2F3_ONCOGENIC_SIGNATURE;BOUDOUKHA_BOUND_BY_IGF2BP2;CAGCTG_V$AP4_Q5;CAGGTG_V$E12_Q6;CAGTATT,MIR-200B,MIR-200C,MIR-429;CATTGTYY_V$SOX9_B1;CHICAS_RB1_TARGETS_GROWING;CHICAS_RB1_TARGETS_SENESCENT;chr9p22;CREIGHTON_END…	3D-structure;Alternativesplicing;Chromosomalrearrangement;Citrullination;Coiledcoil;Completeproteome;Directproteinsequencing;DNA-binding;Host-virusinteraction;Nucleus;Phosphoprotein;Referenceproteome;Transcription;Transcriptionregulation		Casein kinase I substrate motif;Casein kinase II substrate motif;PKA kinase substrate motif;PKC kinase substrate motif;Pyruvate dehydrogenase kinase substrate motif	+	CST;HTP	1	0	362.79	353.76	362.79	0.6683	4620400000	3807100000	813330000	129	75.8333
0.284265	NaN	-0.664893	NaN	1.11921	0.690461	0.932875	0.338107	0.409022	0.459882	-0.414761	NaN	NaN	-0.0909458	0.0259418	NaN	0.707138	-0.167658	0.225634	0.409022	-0.032502	-0.441524	0.142971	S	2	___1	biological regulation;biosynthetic process;cellular biosynthetic process;cellular component assembly;cellular component assembly at cellular level;cellular component organization;cellular component organization at cellular level;cellular component organization or biogenesis;cellular component organization or biogenesis at cellular level;cellular macromolecular complex assembly;cellular macromolec…	activating transcription factor binding;binding;chromatin binding;DNA binding;nucleic acid binding;protein binding;protein binding transcription factor activity;RNA polymerase II transcription coactivator activity;RNA polymerase II transcription cofactor activity;RNA polymerase II transcription factor binding transcription factor activity;RNA polymerase II transcription factor binding transcripti…	cell part;chromatin;chromosomal part;cytoplasmic part;cytosol;heterochromatin;intracellular membrane-bounded organelle;intracellular organelle;intracellular organelle part;intracellular part;membrane-bounded organelle;nuclear chromatin;nuclear chromosome part;nuclear heterochromatin;nuclear part;nuclear periphery;nucleoplasm;nucleus;organelle;organelle part;transcriptionally active chromatin	biological regulation;biosynthetic process;cellular component assembly;cellular component organization;cellular macromolecular complex assembly;cellular metabolic process;cellular nitrogen compound metabolic process;cellular process;macromolecular complex assembly;macromolecule metabolic process;metabolic process;nitrogen compound metabolic process;nucleobase-containing compound metabolic process…	cell part;cytosol;intracellular membrane-bounded organelle;intracellular organelle;nucleoplasm;nucleus;organelle		LEDGF;PWWP	AAGCCAT,MIR-135A,MIR-135B;ACACTAC,MIR-142-3P;ACTGAAA,MIR-30A-3P,MIR-30E-3P;AGCATTA,MIR-155;AGUIRRE_PANCREATIC_CANCER_COPY_NUMBER_DN;BENPORATH_ES_1;BHATTACHARYA_EMBRYONIC_STEM_CELL;BILD_E2F3_ONCOGENIC_SIGNATURE;BOUDOUKHA_BOUND_BY_IGF2BP2;CAGCTG_V$AP4_Q5;CAGGTG_V$E12_Q6;CAGTATT,MIR-200B,MIR-200C,MIR-429;CATTGTYY_V$SOX9_B1;CHICAS_RB1_TARGETS_GROWING;CHICAS_RB1_TARGETS_SENESCENT;chr9p22;CREIGHTON_END…	3D-structure;Alternativesplicing;Chromosomalrearrangement;Citrullination;Coiledcoil;Completeproteome;Directproteinsequencing;DNA-binding;Host-virusinteraction;Nucleus;Phosphoprotein;Referenceproteome;Transcription;Transcriptionregulation		Casein kinase II substrate motif;MAPKAPK2 kinase substrate motif;MDC1 BRCT domain binding motif;Plk1 PBD domain binding motif	+	CST;HTP	0.991295	1.44224e-26	130.4	113.18	52.814	-0.19108	514740000	339650000	175080000	106	20.4479
NaN	0.0438751	NaN	-0.228135	-0.915555	0.357112	0.566555	NaN	NaN	-0.334678	NaN	-0.841625	NaN	-0.052248	NaN	0.0467506	0.553867	NaN	0.800396	0.0438751	-0.052248	-0.0961231	0.454996	S	4	___1	biological regulation;biosynthetic process;cellular biosynthetic process;cellular component assembly;cellular component assembly at cellular level;cellular component organization;cellular component organization at cellular level;cellular component organization or biogenesis;cellular component organization or biogenesis at cellular level;cellular macromolecular complex assembly;cellular macromolec…	activating transcription factor binding;binding;chromatin binding;DNA binding;nucleic acid binding;protein binding;protein binding transcription factor activity;RNA polymerase II transcription coactivator activity;RNA polymerase II transcription cofactor activity;RNA polymerase II transcription factor binding transcription factor activity;RNA polymerase II transcription factor binding transcripti…	cell part;chromatin;chromosomal part;cytoplasmic part;cytosol;heterochromatin;intracellular membrane-bounded organelle;intracellular organelle;intracellular organelle part;intracellular part;membrane-bounded organelle;nuclear chromatin;nuclear chromosome part;nuclear heterochromatin;nuclear part;nuclear periphery;nucleoplasm;nucleus;organelle;organelle part;transcriptionally active chromatin	biological regulation;biosynthetic process;cellular component assembly;cellular component organization;cellular macromolecular complex assembly;cellular metabolic process;cellular nitrogen compound metabolic process;cellular process;macromolecular complex assembly;macromolecule metabolic process;metabolic process;nitrogen compound metabolic process;nucleobase-containing compound metabolic process…	cell part;cytosol;intracellular membrane-bounded organelle;intracellular organelle;nucleoplasm;nucleus;organelle		LEDGF;PWWP	AAGCCAT,MIR-135A,MIR-135B;ACACTAC,MIR-142-3P;ACTGAAA,MIR-30A-3P,MIR-30E-3P;AGCATTA,MIR-155;AGUIRRE_PANCREATIC_CANCER_COPY_NUMBER_DN;BENPORATH_ES_1;BHATTACHARYA_EMBRYONIC_STEM_CELL;BILD_E2F3_ONCOGENIC_SIGNATURE;BOUDOUKHA_BOUND_BY_IGF2BP2;CAGCTG_V$AP4_Q5;CAGGTG_V$E12_Q6;CAGTATT,MIR-200B,MIR-200C,MIR-429;CATTGTYY_V$SOX9_B1;CHICAS_RB1_TARGETS_GROWING;CHICAS_RB1_TARGETS_SENESCENT;chr9p22;CREIGHTON_END…	3D-structure;Alternativesplicing;Chromosomalrearrangement;Citrullination;Coiledcoil;Completeproteome;Directproteinsequencing;DNA-binding;Host-virusinteraction;Nucleus;Phosphoprotein;Referenceproteome;Transcription;Transcriptionregulation		Casein kinase II substrate motif;G protein-coupled receptor kinase 1 substrate motif;MDC1 BRCT domain binding motif;PKA kinase substrate motif;PKC kinase substrate motif;Plk1 PBD domain binding motif	+	HTP	0.826209	6.33156e-09	110.74	71.958	110.74	-0.37578	320140000	199850000	120290000	514	6.8549
-0.075079	-0.824386	-0.576575	-0.810711	0.39274	0.157048	0.179888	-0.195149	0.51224	-0.207103	-1.11761	-0.202299	0.0117837	0.0825948	-0.349137	-0.192238	-0.0612389	-0.341564	0.546228	-0.075079	-0.202299	-0.12722	0.421155	S	2	___1	assembly of spliceosomal tri-snRNP;biological regulation;cellular component assembly;cellular component assembly at cellular level;cellular component organization;cellular component organization at cellular level;cellular component organization or biogenesis;cellular component organization or biogenesis at cellular level;cellular macromolecular complex assembly;cellular macromolecular complex sub…	binding;nucleic acid binding;nucleotide binding;protein binding;protein domain specific binding;RNA binding;RS domain binding;unfolded protein binding	cell part;cytoplasm;intracellular membrane-bounded organelle;intracellular organelle;intracellular organelle part;intracellular part;membrane-bounded organelle;nuclear body;nuclear part;nuclear speck;nucleoplasm;nucleoplasm part;nucleus;organelle;organelle part	biological regulation;cellular component assembly;cellular component organization;cellular macromolecular complex assembly;cellular metabolic process;cellular nitrogen compound metabolic process;cellular process;establishment of localization;macromolecular complex assembly;macromolecule metabolic process;metabolic process;mRNA metabolic process;mRNA processing;nitrogen compound metabolic process;…	cell part;cytoplasm;intracellular membrane-bounded organelle;intracellular organelle;nucleoplasm;nucleus;organelle	Spliceosome	RRM_1	ACCAAAG,MIR-9;ACTGAAA,MIR-30A-3P,MIR-30E-3P;ACTGTAG,MIR-139;ASTON_MAJOR_DEPRESSIVE_DISORDER_DN;ATACTGT,MIR-144;ATATGCA,MIR-448;ATGAAGG,MIR-205;ATGCACG,MIR-517B;BENPORATH_CYCLING_GENES;BILD_CTNNB1_ONCOGENIC_SIGNATURE;BIOPOLYMER_METABOLIC_PROCESS;BLUM_RESPONSE_TO_SALIRASIB_DN;BORCZUK_MALIGNANT_MESOTHELIOMA_UP;BOUDOUKHA_BOUND_BY_IGF2BP2;BROWNE_HCMV_INFECTION_16HR_UP;BURTON_ADIPOGENESIS_12;BYSTRYKH_H…	Alternativesplicing;Completeproteome;Cytoplasm;mRNAprocessing;mRNAsplicing;Nucleus;Phosphoprotein;Referenceproteome;RNA-binding		Casein kinase II substrate motif	+	CST;HTP	0.994818	9.50149e-05	81.263	69.07	76.228	-0.3389	612050000	395640000	216410000	106	23.7381
0.00507918	-0.0130249	-0.742089	-0.803054	-0.100053	-0.114668	-0.35747	-0.101992	-0.0151348	-0.371356	-0.105326	-0.527296	-0.400276	-0.493969	-0.831778	-0.105182	-0.2016	0.35816	0.756842	-0.101992	-0.371356	-0.269364	0.277076	S	2	___1	assembly of spliceosomal tri-snRNP;biological regulation;cellular component assembly;cellular component assembly at cellular level;cellular component organization;cellular component organization at cellular level;cellular component organization or biogenesis;cellular component organization or biogenesis at cellular level;cellular macromolecular complex assembly;cellular macromolecular complex sub…	binding;nucleic acid binding;nucleotide binding;protein binding;protein domain specific binding;RNA binding;RS domain binding;unfolded protein binding	cell part;cytoplasm;intracellular membrane-bounded organelle;intracellular organelle;intracellular organelle part;intracellular part;membrane-bounded organelle;nuclear body;nuclear part;nuclear speck;nucleoplasm;nucleoplasm part;nucleus;organelle;organelle part	biological regulation;cellular component assembly;cellular component organization;cellular macromolecular complex assembly;cellular metabolic process;cellular nitrogen compound metabolic process;cellular process;establishment of localization;macromolecular complex assembly;macromolecule metabolic process;metabolic process;mRNA metabolic process;mRNA processing;nitrogen compound metabolic process;…	cell part;cytoplasm;intracellular membrane-bounded organelle;intracellular organelle;nucleoplasm;nucleus;organelle	Spliceosome	RRM_1	ACCAAAG,MIR-9;ACTGAAA,MIR-30A-3P,MIR-30E-3P;ACTGTAG,MIR-139;ASTON_MAJOR_DEPRESSIVE_DISORDER_DN;ATACTGT,MIR-144;ATATGCA,MIR-448;ATGAAGG,MIR-205;ATGCACG,MIR-517B;BENPORATH_CYCLING_GENES;BILD_CTNNB1_ONCOGENIC_SIGNATURE;BIOPOLYMER_METABOLIC_PROCESS;BLUM_RESPONSE_TO_SALIRASIB_DN;BORCZUK_MALIGNANT_MESOTHELIOMA_UP;BOUDOUKHA_BOUND_BY_IGF2BP2;BROWNE_HCMV_INFECTION_16HR_UP;BURTON_ADIPOGENESIS_12;BYSTRYKH_H…	Alternativesplicing;Completeproteome;Cytoplasm;mRNAprocessing;mRNAsplicing;Nucleus;Phosphoprotein;Referenceproteome;RNA-binding		14-3-3 domain binding motif;Akt kinase substrate motif;Calmodulin-dependent protein kinase II substrate motif;Casein kinase II substrate motif;MAPKAPK1 kinase substrate motif;MAPKAPK2 kinase substrate motif;PKA kinase substrate motif;PKC kinase substrate motif	+	CST;HTP	1	2.34014e-15	156.08	132.94	155.39	0.12021	10861000000	7208300000	3652600000	133	90.152
0.19417	-0.223033	-1.14993	-0.9217	NaN	0.788379	-0.0680827	-0.402432	0.670266	-0.455875	-0.362298	-0.577174	0.251583	NaN	-0.883393	-0.508212	-0.0498303	-0.0598699	0.501709	-0.145558	-0.409087	-0.263529	0.282499	S	2	___1	assembly of spliceosomal tri-snRNP;biological regulation;cellular component assembly;cellular component assembly at cellular level;cellular component organization;cellular component organization at cellular level;cellular component organization or biogenesis;cellular component organization or biogenesis at cellular level;cellular macromolecular complex assembly;cellular macromolecular complex sub…	binding;nucleic acid binding;nucleotide binding;protein binding;protein domain specific binding;RNA binding;RS domain binding;unfolded protein binding	cell part;cytoplasm;intracellular membrane-bounded organelle;intracellular organelle;intracellular organelle part;intracellular part;membrane-bounded organelle;nuclear body;nuclear part;nuclear speck;nucleoplasm;nucleoplasm part;nucleus;organelle;organelle part	biological regulation;cellular component assembly;cellular component organization;cellular macromolecular complex assembly;cellular metabolic process;cellular nitrogen compound metabolic process;cellular process;establishment of localization;macromolecular complex assembly;macromolecule metabolic process;metabolic process;mRNA metabolic process;mRNA processing;nitrogen compound metabolic process;…	cell part;cytoplasm;intracellular membrane-bounded organelle;intracellular organelle;nucleoplasm;nucleus;organelle	Spliceosome	RRM_1	ACCAAAG,MIR-9;ACTGAAA,MIR-30A-3P,MIR-30E-3P;ACTGTAG,MIR-139;ASTON_MAJOR_DEPRESSIVE_DISORDER_DN;ATACTGT,MIR-144;ATATGCA,MIR-448;ATGAAGG,MIR-205;ATGCACG,MIR-517B;BENPORATH_CYCLING_GENES;BILD_CTNNB1_ONCOGENIC_SIGNATURE;BIOPOLYMER_METABOLIC_PROCESS;BLUM_RESPONSE_TO_SALIRASIB_DN;BORCZUK_MALIGNANT_MESOTHELIOMA_UP;BOUDOUKHA_BOUND_BY_IGF2BP2;BROWNE_HCMV_INFECTION_16HR_UP;BURTON_ADIPOGENESIS_12;BYSTRYKH_H…	Alternativesplicing;Completeproteome;Cytoplasm;mRNAprocessing;mRNAsplicing;Nucleus;Phosphoprotein;Referenceproteome;RNA-binding		Casein kinase II substrate motif;ERK1,2 kinase substrate motif;G protein-coupled receptor kinase 1 substrate motif;Growth associated histone HI kinase substrate motif;GSK3 kinase substrate motif;GSK-3, ERK1, ERK2, CDK5 substrate motif;PKA kinase substrate motif;PKC kinase substrate motif;WW domain binding motif	+	CST;HTP	0.995	0.000848211	82.279	69.451	69.342	0.20705	424490000	265530000	158960000	255	23.2412
-0.0326396	0.888449	-0.0236384	0.00550015	-0.474636	-0.390614	-0.0528856	0.173791	0.695398	0.449027	NaN	0.175576	-0.130131	0.509647	0.153287	0.695728	-1.01572	0.628252	0.705459	-0.0236384	0.312302	0.33594	0.148081	S	3	___1	assembly of spliceosomal tri-snRNP;biological regulation;cellular component assembly;cellular component assembly at cellular level;cellular component organization;cellular component organization at cellular level;cellular component organization or biogenesis;cellular component organization or biogenesis at cellular level;cellular macromolecular complex assembly;cellular macromolecular complex sub…	binding;nucleic acid binding;nucleotide binding;protein binding;protein domain specific binding;RNA binding;RS domain binding;unfolded protein binding	cell part;cytoplasm;intracellular membrane-bounded organelle;intracellular organelle;intracellular organelle part;intracellular part;membrane-bounded organelle;nuclear body;nuclear part;nuclear speck;nucleoplasm;nucleoplasm part;nucleus;organelle;organelle part	biological regulation;cellular component assembly;cellular component organization;cellular macromolecular complex assembly;cellular metabolic process;cellular nitrogen compound metabolic process;cellular process;establishment of localization;macromolecular complex assembly;macromolecule metabolic process;metabolic process;mRNA metabolic process;mRNA processing;nitrogen compound metabolic process;…	cell part;cytoplasm;intracellular membrane-bounded organelle;intracellular organelle;nucleoplasm;nucleus;organelle	Spliceosome	RRM_1	ACCAAAG,MIR-9;ACTGAAA,MIR-30A-3P,MIR-30E-3P;ACTGTAG,MIR-139;ASTON_MAJOR_DEPRESSIVE_DISORDER_DN;ATACTGT,MIR-144;ATATGCA,MIR-448;ATGAAGG,MIR-205;ATGCACG,MIR-517B;BENPORATH_CYCLING_GENES;BILD_CTNNB1_ONCOGENIC_SIGNATURE;BIOPOLYMER_METABOLIC_PROCESS;BLUM_RESPONSE_TO_SALIRASIB_DN;BORCZUK_MALIGNANT_MESOTHELIOMA_UP;BOUDOUKHA_BOUND_BY_IGF2BP2;BROWNE_HCMV_INFECTION_16HR_UP;BURTON_ADIPOGENESIS_12;BYSTRYKH_H…	Alternativesplicing;Completeproteome;Cytoplasm;mRNAprocessing;mRNAsplicing;Nucleus;Phosphoprotein;Referenceproteome;RNA-binding		14-3-3 domain binding motif;Calmodulin-dependent protein kinase II substrate motif;Casein kinase II substrate motif;PKA kinase substrate motif;PKC kinase substrate motif;Pyruvate dehydrogenase kinase substrate motif;ZIP kinase substrate motif	+	CST;HTP	0.953096	4.21957e-141	228.19	225.28	127.14	-0.30266	528480000	349260000	179220000	157	13.0797
0.11445	-0.107758	-0.335518	-0.121221	0.648632	0.0169426	-0.404068	-0.872539	-0.734775	0.796106	-0.376987	-0.211581	-0.242337	0.222404	-0.00114859	0.366447	0.390197	-0.950995	0.400061	-0.121221	-0.00114859	0.120073	0.319846	S	2	___1	anatomical structure morphogenesis;biological regulation;cellular macromolecule metabolic process;cellular metabolic process;cellular nitrogen compound metabolic process;cellular process;cellular protein metabolic process;cellular response to chemical stimulus;cellular response to dsRNA;cellular response to organic substance;cellular response to oxidative stress;cellular response to stimulus;cell…	binding;double-stranded RNA binding;enzyme activator activity;enzyme binding;enzyme regulator activity;identical protein binding;nucleic acid binding;protein binding;protein dimerization activity;protein homodimerization activity;RNA binding	cell part;cytoplasm;cytoplasmic part;cytosol;intracellular organelle part;intracellular part;membrane;nuclear part;nucleoplasm;organelle part;perinuclear region of cytoplasm	anatomical structure morphogenesis;biological regulation;cellular metabolic process;cellular nitrogen compound metabolic process;cellular process;developmental process;immune system process;macromolecule metabolic process;macromolecule modification;metabolic process;multi-organism process;nitrogen compound metabolic process;nucleobase-containing compound metabolic process;phosphorus metabolic pro…	cell part;cytoplasm;cytosol;membrane;nucleoplasm		dsrm	BENPORATH_MYC_MAX_TARGETS;BOYLAN_MULTIPLE_MYELOMA_D_CLUSTER_DN;BOYLAN_MULTIPLE_MYELOMA_D_DN;CELL_PROLIFERATION_GO_0008283;CHIBA_RESPONSE_TO_TSA;chr2q31;CTTTGTA,MIR-524;CYTOPLASM;DANG_BOUND_BY_MYC;DIAZ_CHRONIC_MEYLOGENOUS_LEUKEMIA_UP;ENZYME_ACTIVATOR_ACTIVITY;ENZYME_REGULATOR_ACTIVITY;FIRESTEIN_PROLIFERATION;FLECHNER_BIOPSY_KIDNEY_TRANSPLANT_OK_VS_DONOR_UP;FLECHNER_BIOPSY_KIDNEY_TRANSPLANT_REJECTE…	3D-structure;Alternativesplicing;Completeproteome;Cytoplasm;Diseasemutation;Dystonia;Parkinsonism;Phosphoprotein;Referenceproteome;Repeat;RNA-binding;RNA-mediatedgenesilencing		14-3-3 domain binding motif;b-Adrenergic Receptor kinase substrate motif;Calmodulin-dependent protein kinase II substrate motif;Calmodulin-dependent protein kinase IV substrate motif;Casein kinase II substrate motif;Chk1 kinase substrate motif;G protein-coupled receptor kinase 1 substrate motif;GSK3 kinase substrate motif;PKA kinase substrate motif;PKC epsilon kinase substrate motif;PKC kinase su…	+	CST;HTP	0.996561	9.23142e-84	199.38	191.9	74.987	-0.67021	1149800000	794110000	355650000	18	24.8995
-0.81582	-2.04641	-0.869887	-0.707712	-0.836875	-1.05748	0.0668904	-0.974608	-0.289826	-1.50395	-0.420442	-1.09743	-1.03007	-0.597181	-0.21386	-0.886469	-0.534487	-0.307224	0.668161	-0.836875	-0.597181	0.239694	0.215456	S	2	___1	anatomical structure morphogenesis;axon guidance;axonogenesis;biological regulation;biosynthetic process;branchiomotor neuron axon guidance;cell part morphogenesis;cell projection morphogenesis;cell projection organization;cellular biosynthetic process;cellular component morphogenesis;cellular component organization;cellular component organization at cellular level;cellular component organization…	acid-amino acid ligase activity;binding;catalytic activity;cation binding;ion binding;ligase activity;ligase activity, forming carbon-nitrogen bonds;metal ion binding;small conjugating protein ligase activity;transition metal ion binding;ubiquitin-protein ligase activity;zinc ion binding	axon;cell part;cell projection;cytoskeleton;intracellular membrane-bounded organelle;intracellular non-membrane-bounded organelle;intracellular organelle;intracellular part;membrane;membrane-bounded organelle;microtubule cytoskeleton;neuron projection;non-membrane-bounded organelle;nucleus;organelle	anatomical structure morphogenesis;biological regulation;biosynthetic process;cellular component morphogenesis;cellular component organization;cellular metabolic process;cellular nitrogen compound metabolic process;cellular process;developmental process;locomotion;macromolecule metabolic process;metabolic process;nitrogen compound metabolic process;nucleobase-containing compound metabolic process…	cell part;cell projection;cytoskeleton;intracellular membrane-bounded organelle;intracellular non-membrane-bounded organelle;intracellular organelle;membrane;neuron projection;nucleus;organelle		Filamin;PHR;RCC1;SH3_3;zf-RING_2	ACCATTT,MIR-522;ACEVEDO_LIVER_TUMOR_VS_NORMAL_ADJACENT_TISSUE_DN;ACEVEDO_NORMAL_TISSUE_ADJACENT_TO_LIVER_TUMOR_UP;ACTGCCT,MIR-34B;ATGCTGG,MIR-338;BENPORATH_CYCLING_GENES;BUCKANOVICH_T_LYMPHOCYTE_HOMING_ON_TUMOR_UP;CHANDRAN_METASTASIS_UP;chr13q22;DACOSTA_UV_RESPONSE_VIA_ERCC3_COMMON_DN;DACOSTA_UV_RESPONSE_VIA_ERCC3_DN;GABRIELY_MIR21_TARGETS;GACTGTT,MIR-212,MIR-132;GAGCCTG,MIR-484;GATTGGY_V$NFY_Q6_…	Alternativesplicing;Completeproteome;Disulfidebond;Ligase;Metal-binding;Nucleus;Phosphoprotein;Polymorphism;Referenceproteome;Repeat;Transcription;Transcriptionregulation;Ublconjugation;Ublconjugationpathway;Zinc;Zinc-finger		14-3-3 domain binding motif;Akt kinase substrate motif;Calmodulin-dependent protein kinase II substrate motif;Casein kinase II substrate motif;MAPKAPK1 kinase substrate motif;PKA kinase substrate motif;PKC kinase substrate motif;ZIP kinase substrate motif	+	CST;HTP	1	2.65406e-21	157.42	136.63	157.42	2.4414	355380000	201470000	153910000	3467	70.1808
-0.417284	-0.299466	0.106053	0.241615	-0.642082	-0.392264	-0.178215	-0.774634	-0.377268	-0.569235	-0.12439	-0.222672	-0.49275	0.503802	-0.0263235	-0.491883	-0.190113	0.346908	0.336996	-0.377268	-0.190113	0.187155	0.258718	S	2	___1	anatomical structure morphogenesis;axon guidance;axonogenesis;biological regulation;biosynthetic process;branchiomotor neuron axon guidance;cell part morphogenesis;cell projection morphogenesis;cell projection organization;cellular biosynthetic process;cellular component morphogenesis;cellular component organization;cellular component organization at cellular level;cellular component organization…	acid-amino acid ligase activity;binding;catalytic activity;cation binding;ion binding;ligase activity;ligase activity, forming carbon-nitrogen bonds;metal ion binding;small conjugating protein ligase activity;transition metal ion binding;ubiquitin-protein ligase activity;zinc ion binding	axon;cell part;cell projection;cytoskeleton;intracellular membrane-bounded organelle;intracellular non-membrane-bounded organelle;intracellular organelle;intracellular part;membrane;membrane-bounded organelle;microtubule cytoskeleton;neuron projection;non-membrane-bounded organelle;nucleus;organelle	anatomical structure morphogenesis;biological regulation;biosynthetic process;cellular component morphogenesis;cellular component organization;cellular metabolic process;cellular nitrogen compound metabolic process;cellular process;developmental process;locomotion;macromolecule metabolic process;metabolic process;nitrogen compound metabolic process;nucleobase-containing compound metabolic process…	cell part;cell projection;cytoskeleton;intracellular membrane-bounded organelle;intracellular non-membrane-bounded organelle;intracellular organelle;membrane;neuron projection;nucleus;organelle		Filamin;PHR;RCC1;SH3_3;zf-RING_2	ACCATTT,MIR-522;ACEVEDO_LIVER_TUMOR_VS_NORMAL_ADJACENT_TISSUE_DN;ACEVEDO_NORMAL_TISSUE_ADJACENT_TO_LIVER_TUMOR_UP;ACTGCCT,MIR-34B;ATGCTGG,MIR-338;BENPORATH_CYCLING_GENES;BUCKANOVICH_T_LYMPHOCYTE_HOMING_ON_TUMOR_UP;CHANDRAN_METASTASIS_UP;chr13q22;DACOSTA_UV_RESPONSE_VIA_ERCC3_COMMON_DN;DACOSTA_UV_RESPONSE_VIA_ERCC3_DN;GABRIELY_MIR21_TARGETS;GACTGTT,MIR-212,MIR-132;GAGCCTG,MIR-484;GATTGGY_V$NFY_Q6_…	Alternativesplicing;Completeproteome;Disulfidebond;Ligase;Metal-binding;Nucleus;Phosphoprotein;Polymorphism;Referenceproteome;Repeat;Transcription;Transcriptionregulation;Ublconjugation;Ublconjugationpathway;Zinc;Zinc-finger		14-3-3 domain binding motif;Akt kinase substrate motif;Calmodulin-dependent protein kinase II substrate motif;Casein kinase II substrate motif;G protein-coupled receptor kinase 1 substrate motif;MAPKAPK1 kinase substrate motif;PKA kinase substrate motif;PKC kinase substrate motif	+	CST;HTP	0.99996	8.61541e-123	271.91	260.2	237.16	0.43879	1676800000	1052500000	624320000	2833	44.979
[truncated: 4,603 more rows]
[truncated: 13 more columns]

## Sheet: 105 phosphosites
YOUNGER	YOUNGER	YOUNGER	YOUNGER	YOUNGER	YOUNGER	YOUNGER	YOUNGER	YOUNGER	OLDER	OLDER	OLDER	OLDER	OLDER	OLDER	OLDER	OLDER	OLDER
P101	P116	P118	P125	P127	P131	P142	P143	P154	P155	P110	P120	P137	P138	P139	P141	P144	P153	p-value	Median younger	Median elderly	FC eldery/younger	FC significance	p-site
-0.568537	-0.423336	NaN	NaN	0.543098	0.788995	NaN	1.53098	NaN	2.25108	NaN	NaN	2.70076	1.02947	2.29441	2.87962	1.43835	NaN	0.00815458	0.543098	2.27274	1.72965	9.33912e-07	FNBP1L_S430
-3.21473	-3.86988	-4.20325	-3.21276	-2.52257	-1.28062	-1.7987	NaN	NaN	-2.86915	-0.592906	-3.09099	-1.80269	0.0230627	0.00261828	-2.80542	0.145055	-1.68987	0.0287745	-3.21276	-1.68987	1.52289	1.24892e-05	DDX41_S21
-3.21473	-3.86988	-4.20325	-3.21276	-2.52257	-1.28062	-1.7987	NaN	NaN	-2.86915	-0.592906	-3.09099	-1.80269	0.0230627	0.00261828	-2.80542	0.145055	-1.68987	0.0287745	-3.21276	-1.68987	1.52289	1.24892e-05	DDX41_S23
1.52595	1.11332	1.75241	2.23117	NaN	2.24554	NaN	NaN	NaN	NaN	2.54475	4.47381	3.11004	4.35478	NaN	NaN	NaN	3.27104	0.00537184	1.75241	3.27104	1.51862	1.31355e-05	FAM65B_S37
1.472	3.09743	1.26408	1.05233	-1.09326	-0.115737	-0.335847	NaN	-0.26132	3.83894	2.73292	1.755	NaN	2.68972	1.57977	1.38311	0.90541	NaN	0.0295646	0.468294	1.755	1.28671	0.000169086	AHNAK_S5762
-0.0663695	0.0899988	-0.312662	NaN	NaN	-0.130493	0.0848507	NaN	NaN	1.15733	NaN	NaN	0.93889	2.4003	NaN	NaN	0.933591	1.23267	0.00543747	-0.0663695	1.15733	1.2237	0.000317897	FAM21C_S539
NaN	0.577554	0.618611	NaN	-1.54637	-0.332	-1.50493	-0.277456	-0.0122212	1.18108	0.930215	0.953607	-0.50546	0.92025	NaN	NaN	0.400312	0.409644	0.0349068	-0.277456	0.92025	1.19771	0.000409288	AHNAK_S5762
0.282424	0.544214	0.960247	1.13275	-0.117711	1.07841	0.11741	NaN	-0.284233	0.927709	NaN	1.67524	0.723927	1.48431	1.88651	1.49209	1.63064	0.849542	0.00380162	0.413319	1.4882	1.07488	0.00127068	HMHA1_S23
0.282424	0.544214	0.960247	1.13275	-0.117711	1.07841	0.11741	NaN	-0.284233	0.927709	NaN	1.67524	0.723927	1.48431	1.88651	1.49209	1.63064	0.849542	0.00380162	0.413319	1.4882	1.07488	0.00127068	HMHA1_S25
3.00567	3.73076	2.30633	2.94932	3.11012	5.45784	1.66335	3.65982	1.54466	2.9768	3.66597	2.63264	4.07747	4.9856	4.34665	4.08048	5.93076	6.03272	0.039371	3.00567	4.08048	1.07481	0.00127143	LSP1_S177
-0.711338	-0.342438	-0.903386	-0.353158	NaN	-0.170072	-0.90562	NaN	-0.940427	0.476887	1.23642	-0.468764	NaN	0.242388	0.422364	0.996152	-1.08864	0.0966845	0.0152584	-0.711338	0.332376	1.04371	0.00166703	RMI1_S284
2.54269	3.52363	NaN	2.29431	2.60564	3.55619	NaN	NaN	NaN	NaN	3.41478	3.90162	NaN	3.6413	3.71337	3.64379	NaN	NaN	0.0432157	2.60564	3.64379	1.03816	0.00174851	SP100_S389
[truncated: 93 more rows]
