# Supplementary material for: Biological characteristics of aging in human acute myeloid leukemia cells: the possible importance of aldehyde dehydrogenase, the cytoskeleton and altered transcriptional regulation
Source: Aging (Albany NY). 2020 Dec 20;12(24):24734–77. doi: 10.18632/aging.202361 (PMC7803495; doi:10.18632/aging.202361)
Supplement: Supplementary File 4 [file aging-12-202361-s011.xlsx]

## Sheet: Details
Supplementary File 4. Phosphoproteomic quantification of 15 high-risk and 18 low-risk patients.
MS phosphoproteomic data from 15 high-risk and 18 low-risk patients
Datasheet "Phosphoproteome dataset 5 VV" contains the phosphoproteomics data after selecting 5 quantified valid values of each protein per group
Datasheet "239 phosphosites" contains significantly regulated phosphorylation sites after applying two variance t-test and Z-statistics

## Sheet: Phosphoproteome dataset 5 VV
LOW-RISK	LOW-RISK	LOW-RISK	LOW-RISK	LOW-RISK	LOW-RISK	LOW-RISK	LOW-RISK	LOW-RISK	LOW-RISK	LOW-RISK	LOW-RISK	LOW-RISK	LOW-RISK	LOW-RISK	LOW-RISK	LOW-RISK	LOW-RISK	HIGH-RISK	HIGH-RISK	HIGH-RISK	HIGH-RISK	HIGH-RISK	HIGH-RISK	HIGH-RISK	HIGH-RISK	HIGH-RISK	HIGH-RISK	HIGH-RISK	HIGH-RISK	HIGH-RISK	HIGH-RISK	HIGH-RISK
P101	P110	P116	P118	P120	P125	P127	P131	P137	P138	P139	P141	P142	P143	P144	P153	P154	P155	P105	P107	P112	P114	P115	P117	P122	P123	P124	P128	P129	P130	P133	P134	P140	p-value	Median LOW-RISK	Median HIGH-RISK	FC HIGH RISK/LOW-RISK	FC significance	Amino acid	Charge	Multiplicity	GOBP name	GOMF name	GOCC name	GOBP slim name	GOCC slim name	KEGG name	Pfam	GSEA	Keywords
1.94376	NaN	2.3042	NaN	0.857319	0.273901	1.67195	0.172035	NaN	1.24244	NaN	-0.220248	0.746347	NaN	NaN	1.8424	-0.0853925	-0.384785	NaN	NaN	NaN	NaN	0.534001	0.506772	1.22815	NaN	NaN	-0.624532	NaN	1.09865	NaN	NaN	NaN	0.474183	0.801833	0.534001	-0.267832	0.274552	S	4	___1	cellular component organization;cellular component organization or biogenesis;cellular membrane organization;cellular process;endocytosis;establishment of localization;lipid transport;membrane invagination;membrane organization;organic substance transport;transport;vesicle-mediated transport	alcohol binding;amine binding;binding;calcium ion binding;calcium-dependent phospholipid binding;cation binding;identical protein binding;ion binding;lipid binding;metal ion binding;phosphatidylcholine binding;phosphatidylethanolamine binding;phosphatidylinositol binding;phospholipid binding;protein binding;quaternary ammonium group binding	cell part;cytoplasmic part;endoplasmic reticulum part;extrinsic to internal side of plasma membrane;extrinsic to membrane;extrinsic to plasma membrane;integral to membrane;integral to plasma membrane;intracellular organelle part;intracellular part;intrinsic to endoplasmic reticulum membrane;intrinsic to membrane;intrinsic to organelle membrane;intrinsic to plasma membrane;membrane;membrane part;o…	cellular component organization;cellular membrane organization;cellular process;endocytosis;establishment of localization;lipid transport;membrane invagination;membrane organization;transport;vesicle-mediated transport	cell part;membrane		C2	ACCAAAG,MIR-9;ATGCTGG,MIR-338;BROWN_MYELOID_CELL_DEVELOPMENT_UP;CATGTAA,MIR-496;CHARAFE_BREAST_CANCER_LUMINAL_VS_BASAL_DN;chr7q36;GABRIELY_MIR21_TARGETS;GRADE_COLON_CANCER_UP;GSE10239_KLRG1INT_VS_KLRG1HIGH_EFF_CD8_TCELL_DN;GSE10239_MEMORY_VS_KLRG1INT_EFF_CD8_TCELL_UP;GSE14350_TREG_VS_TEFF_IN_IL2RB_KO_UP;GSE2706_R848_VS_LPS_8H_STIM_DC_DN;GSE2706_R848_VS_R848_AND_LPS_8H_STIM_DC_DN;GSE27786_CD4_VS_C…	3D-structure;Alternativesplicing;Calcium;Cellmembrane;Completeproteome;Endocytosis;Endoplasmicreticulum;Lipid-binding;Lipidtransport;Membrane;Metal-binding;Phosphoprotein;Polymorphism;Referenceproteome;Repeat;Transmembrane;Transmembranehelix;Transport
1.36768	NaN	1.63201	NaN	NaN	0.387012	NaN	-0.649537	1.26307	NaN	NaN	1.11888	NaN	NaN	0.424324	NaN	NaN	0.81893	0.920404	NaN	-0.392822	NaN	NaN	1.3279	NaN	0.939995	NaN	0.236674	NaN	NaN	0.894698	NaN	NaN	0.704555	0.968905	0.907551	-0.061354	0.488438	S	3	___1	cellular component organization;cellular component organization or biogenesis;cellular membrane organization;cellular process;endocytosis;establishment of localization;lipid transport;membrane invagination;membrane organization;organic substance transport;transport;vesicle-mediated transport	alcohol binding;amine binding;binding;calcium ion binding;calcium-dependent phospholipid binding;cation binding;identical protein binding;ion binding;lipid binding;metal ion binding;phosphatidylcholine binding;phosphatidylethanolamine binding;phosphatidylinositol binding;phospholipid binding;protein binding;quaternary ammonium group binding	cell part;cytoplasmic part;endoplasmic reticulum part;extrinsic to internal side of plasma membrane;extrinsic to membrane;extrinsic to plasma membrane;integral to membrane;integral to plasma membrane;intracellular organelle part;intracellular part;intrinsic to endoplasmic reticulum membrane;intrinsic to membrane;intrinsic to organelle membrane;intrinsic to plasma membrane;membrane;membrane part;o…	cellular component organization;cellular membrane organization;cellular process;endocytosis;establishment of localization;lipid transport;membrane invagination;membrane organization;transport;vesicle-mediated transport	cell part;membrane		C2	ACCAAAG,MIR-9;ATGCTGG,MIR-338;BROWN_MYELOID_CELL_DEVELOPMENT_UP;CATGTAA,MIR-496;CHARAFE_BREAST_CANCER_LUMINAL_VS_BASAL_DN;chr7q36;GABRIELY_MIR21_TARGETS;GRADE_COLON_CANCER_UP;GSE10239_KLRG1INT_VS_KLRG1HIGH_EFF_CD8_TCELL_DN;GSE10239_MEMORY_VS_KLRG1INT_EFF_CD8_TCELL_UP;GSE14350_TREG_VS_TEFF_IN_IL2RB_KO_UP;GSE2706_R848_VS_LPS_8H_STIM_DC_DN;GSE2706_R848_VS_R848_AND_LPS_8H_STIM_DC_DN;GSE27786_CD4_VS_C…	3D-structure;Alternativesplicing;Calcium;Cellmembrane;Completeproteome;Endocytosis;Endoplasmicreticulum;Lipid-binding;Lipidtransport;Membrane;Metal-binding;Phosphoprotein;Polymorphism;Referenceproteome;Repeat;Transmembrane;Transmembranehelix;Transport
0.0791713	-0.396865	0.181575	-0.415767	0.128753	-0.310986	0.652219	0.0841842	-0.0859611	0.151345	-0.318105	-0.0346019	0.441213	0.148952	-0.215118	0.132406	0.0346731	0.131708	0.0199316	NaN	0.667531	0.302694	-0.108455	0.213782	0.0898836	-0.173712	-0.256615	-0.361497	NaN	0.0186311	-0.0891234	0.110348	-0.133413	0.988271	0.0816777	0.0186311	-0.0630467	0.486574	S	3	___1		protein binding transcription factor activity;RNA polymerase II transcription cofactor activity;RNA polymerase II transcription factor binding transcription factor activity;transcription cofactor activity;transcription factor binding transcription factor activity	cell part;intracellular membrane-bounded organelle;intracellular organelle;intracellular organelle part;intracellular part;macromolecular complex;mediator complex;membrane-bounded organelle;nuclear part;nucleoplasm part;nucleus;organelle;organelle part;protein complex		cell part;intracellular membrane-bounded organelle;intracellular organelle;macromolecular complex;nucleus;organelle;protein complex		Med19	CCTGCTG,MIR-214;chr11q12;GSE14000_TRANSLATED_RNA_VS_MRNA_4H_LPS_DC_UP;GSE14308_TH1_VS_INDUCED_TREG_DN;GSE14769_UNSTIM_VS_120MIN_LPS_BMDM_UP;GSE17974_1.5H_VS_72H_IL4_AND_ANTI_IL12_ACT_CD4_TCELL_UP;GSE17974_CTRL_VS_ACT_IL4_AND_ANTI_IL12_1H_CD4_TCELL_DN;GSE39820_CTRL_VS_TGFBETA1_IL6_IL23A_CD4_TCELL_DN;GSE39820_CTRL_VS_TGFBETA3_IL6_IL23A_CD4_TCELL_DN;GSE7460_CD8_TCELL_VS_TREG_ACT_DN;GSE9037_WT_VS_IRA…	Activator;Alternativesplicing;Completeproteome;Nucleus;Phosphoprotein;Referenceproteome;Transcription;Transcriptionregulation
-1.59822	NaN	-0.383184	0.685412	-0.232315	0.747646	-2.25495	-2.46331	-1.62885	-0.140941	-0.553783	NaN	-2.95849	-3.12466	NaN	NaN	NaN	NaN	-0.845623	NaN	NaN	NaN	-1.51012	NaN	-1.37372	0.498767	NaN	-1.20861	NaN	NaN	0.507242	-1.51854	-0.758062	0.446373	-1.076	-1.02712	0.0488803	0.399165	S	2	___1							Chorein_N	AAGTCCA,MIR-422B,MIR-422A;chr12q23;ESC_J1_UP_EARLY.V1_DN;GSE10094_LCMV_VS_LISTERIA_IND_EFF_CD4_TCELL_UP;GSE13738_RESTING_VS_BYSTANDER_ACTIVATED_CD4_TCELL_DN;GSE13738_RESTING_VS_TCR_ACTIVATED_CD4_TCELL_DN;GSE14350_IL2RB_KO_VS_WT_TEFF_UP;GSE14769_40MIN_VS_360MIN_LPS_BMDM_UP;GSE17580_TREG_VS_TEFF_DN;GSE17721_POLYIC_VS_CPG_2H_BMDM_UP;GSE17721_POLYIC_VS_CPG_6H_BMDM_UP;GSE17721_POLYIC_VS_GARDIQUIMOD_12…	Alternativesplicing;Coiledcoil;Completeproteome;Phosphoprotein;Polymorphism;Referenceproteome
0.611977	NaN	-0.422334	NaN	1.65835	NaN	NaN	NaN	-1.11155	NaN	0.513241	NaN	NaN	NaN	NaN	1.11497	NaN	NaN	1.93401	NaN	NaN	NaN	0.0636312	0.481034	1.0384	0.863074	0.00738586	NaN	1.63031	NaN	1.39901	NaN	NaN	0.300196	0.562609	0.950739	0.38813	0.130375	S	2	___1		enzyme regulator activity;GTPase regulator activity;guanyl-nucleotide exchange factor activity;nucleoside-triphosphatase regulator activity;Ras guanyl-nucleotide exchange factor activity;Rho guanyl-nucleotide exchange factor activity;small GTPase regulator activity					PH;RhoGEF	ACEVEDO_LIVER_CANCER_DN;ACEVEDO_LIVER_TUMOR_VS_NORMAL_ADJACENT_TISSUE_DN;AGUIRRE_PANCREATIC_CANCER_COPY_NUMBER_UP;BENPORATH_NANOG_TARGETS;BENPORATH_SOX2_TARGETS;BOCHKIS_FOXA2_TARGETS;CATTTCA,MIR-203;chr14q23;GSE11057_NAIVE_CD4_VS_PBMC_CD4_TCELL_DN;GSE13229_IMM_VS_MATURE_NKCELL_DN;GSE13306_RA_VS_UNTREATED_TREG_DN;GSE13411_IGM_VS_SWITCHED_MEMORY_BCELL_UP;GSE14769_UNSTIM_VS_240MIN_LPS_BMDM_UP;GSE147…	Alternativesplicing;Completeproteome;Phosphoprotein;Polymorphism;Referenceproteome
NaN	1.0232	NaN	0.441943	0.266854	0.420005	NaN	NaN	NaN	NaN	NaN	NaN	NaN	NaN	1.88035	NaN	-0.274361	NaN	2.11606	1.17576	NaN	NaN	-0.0936409	NaN	NaN	1.87402	1.65302	1.54387	NaN	NaN	1.72144	NaN	0.728835	0.0992201	0.430974	1.59844	1.16747	0.000900652	S	3	___1		enzyme regulator activity;GTPase regulator activity;guanyl-nucleotide exchange factor activity;nucleoside-triphosphatase regulator activity;Ras guanyl-nucleotide exchange factor activity;Rho guanyl-nucleotide exchange factor activity;small GTPase regulator activity					PH;RhoGEF	ACEVEDO_LIVER_CANCER_DN;ACEVEDO_LIVER_TUMOR_VS_NORMAL_ADJACENT_TISSUE_DN;AGUIRRE_PANCREATIC_CANCER_COPY_NUMBER_UP;BENPORATH_NANOG_TARGETS;BENPORATH_SOX2_TARGETS;BOCHKIS_FOXA2_TARGETS;CATTTCA,MIR-203;chr14q23;GSE11057_NAIVE_CD4_VS_PBMC_CD4_TCELL_DN;GSE13229_IMM_VS_MATURE_NKCELL_DN;GSE13306_RA_VS_UNTREATED_TREG_DN;GSE13411_IGM_VS_SWITCHED_MEMORY_BCELL_UP;GSE14769_UNSTIM_VS_240MIN_LPS_BMDM_UP;GSE147…	Alternativesplicing;Completeproteome;Phosphoprotein;Polymorphism;Referenceproteome
NaN	1.34251	0.734615	NaN	0.584936	0.55062	NaN	NaN	0.827661	1.38337	0.48687	1.09403	1.80293	0.518968	0.329871	1.14666	NaN	NaN	0.716067	NaN	1.79978	1.72871	1.15654	NaN	NaN	0.453895	NaN	NaN	1.12101	NaN	NaN	-0.0304187	NaN	0.752328	0.781138	1.12101	0.339872	0.158416	S	2	___1			cell part;cytoplasmic part;intracellular membrane-bounded organelle;intracellular organelle;intracellular part;membrane-bounded organelle;mitochondrion;organelle		cell part;intracellular membrane-bounded organelle;intracellular organelle;mitochondrion;organelle		THRAP3_BCLAF1		Alternativesplicing;Completeproteome;Mitochondrion;Phosphoprotein;Referenceproteome
NaN	2.34602	2.87539	NaN	2.51818	2.49051	NaN	NaN	3.15748	2.97592	1.9445	NaN	3.29565	3.16633	NaN	NaN	1.68487	NaN	3.04374	NaN	2.3478	NaN	2.13789	NaN	3.34837	2.04477	NaN	3.04336	NaN	2.43307	1.66685	NaN	NaN	0.616386	2.69679	2.39043	-0.306355	0.240258	S	2	___1							DUF3496	CAMPS_COLON_CANCER_COPY_NUMBER_UP;chr17p11;GOZGIT_ESR1_TARGETS_DN;GSE10463_CD40L_AND_VA347_VS_CD40L_IN_DC_DN;GSE18791_CTRL_VS_NEWCASTLE_VIRUS_DC_1H_DN;GSE22886_IGM_MEMORY_BCELL_VS_BLOOD_PLASMA_CELL_UP;GSE26928_EFF_MEMORY_VS_CXCR5_POS_CD4_TCELL_DN;GSE360_DC_VS_MAC_L_MAJOR_DN;GSE360_L_DONOVANI_VS_L_MAJOR_MAC_DN;GSE3982_CTRL_VS_PMA_STIM_EOSINOPHIL_DN;GSE3982_EOSINOPHIL_VS_NKCELL_DN;GSE8515_IL1_VS_IL…	Alternativesplicing;Coiledcoil;Completeproteome;Isopeptidebond;Referenceproteome;Ublconjugation
-0.491902	NaN	1.049	NaN	0.563535	0.251956	1.24386	-0.0132488	NaN	1.17673	NaN	0.359802	0.664717	NaN	0.717493	NaN	NaN	0.743304	1.34023	-0.639315	0.413464	2.5365	1.14387	-0.13677	1.20526	1.31361	NaN	0.218494	NaN	NaN	0.0844925	NaN	NaN	0.601044	0.664717	0.778668	0.113951	0.336435	S	2	___1	biological regulation;regulation of biological process;regulation of biosynthetic process;regulation of cellular biosynthetic process;regulation of cellular macromolecule biosynthetic process;regulation of cellular metabolic process;regulation of cellular process;regulation of gene expression;regulation of macromolecule biosynthetic process;regulation of macromolecule metabolic process;regulation…			biological regulation			Helicase_C_4	BUYTAERT_PHOTODYNAMIC_THERAPY_STRESS_UP;BYSTRYKH_HEMATOPOIESIS_STEM_CELL_AND_BRAIN_QTL_TRANS;chr12q24;DORSAM_HOXA9_TARGETS_DN;DOUGLAS_BMI1_TARGETS_UP;GSE12845_IGD_POS_BLOOD_VS_NAIVE_TONSIL_BCELL_DN;GSE13484_3H_UNSTIM_VS_YF17D_VACCINE_STIM_PBMC_DN;GSE14308_TH2_VS_NAIVE_CD4_TCELL_DN;GSE14769_20MIN_VS_360MIN_LPS_BMDM_DN;GSE17721_PAM3CSK4_VS_GADIQUIMOD_16H_BMDM_UP;GSE17721_POLYIC_VS_PAM3CSK4_4H_BMDM_…	Acetylation;Alternativesplicing;Coiledcoil;Completeproteome;Phosphoprotein;Polymorphism;Referenceproteome
-0.481897	-0.10046	0.419631	0.133789	0.00660387	0.0254007	0.0892265	-0.511607	-0.794493	-0.569928	0.32042	0.38811	-0.259999	0.470681	-0.189168	-0.399619	NaN	0.389331	0.34013	-0.0650313	-0.234325	0.942842	0.252979	0.566206	0.69629	0.244585	0.21216	NaN	NaN	0.165699	0.376335	-0.826886	-0.267503	0.132837	0.00660387	0.244585	0.237981	0.229662	S	2	___1	biological regulation;regulation of biological process;regulation of biosynthetic process;regulation of cellular biosynthetic process;regulation of cellular macromolecule biosynthetic process;regulation of cellular metabolic process;regulation of cellular process;regulation of gene expression;regulation of macromolecule biosynthetic process;regulation of macromolecule metabolic process;regulation…			biological regulation			Helicase_C_4	BUYTAERT_PHOTODYNAMIC_THERAPY_STRESS_UP;BYSTRYKH_HEMATOPOIESIS_STEM_CELL_AND_BRAIN_QTL_TRANS;chr12q24;DORSAM_HOXA9_TARGETS_DN;DOUGLAS_BMI1_TARGETS_UP;GSE12845_IGD_POS_BLOOD_VS_NAIVE_TONSIL_BCELL_DN;GSE13484_3H_UNSTIM_VS_YF17D_VACCINE_STIM_PBMC_DN;GSE14308_TH2_VS_NAIVE_CD4_TCELL_DN;GSE14769_20MIN_VS_360MIN_LPS_BMDM_DN;GSE17721_PAM3CSK4_VS_GADIQUIMOD_16H_BMDM_UP;GSE17721_POLYIC_VS_PAM3CSK4_4H_BMDM_…	Acetylation;Alternativesplicing;Coiledcoil;Completeproteome;Phosphoprotein;Polymorphism;Referenceproteome
NaN	1.22574	0.98483	-0.123273	1.19442	0.0214754	-1.08356	-0.703314	0.465206	1.78465	0.728869	0.155427	NaN	NaN	0.465449	-1.02962	-0.244782	0.800292	1.80804	0.123675	NaN	NaN	NaN	NaN	-1.78961	1.18689	1.34481	-3.05309	NaN	-1.27772	0.124571	NaN	0.141006	0.438332	0.465206	0.124571	-0.340634	0.21182	S	2	___1			cell part;membrane		cell part;membrane		HOOK	AGCGCAG,MIR-191;AGGGCAG,MIR-18A;CAGGTG_V$E12_Q6;chr11q13;CTGAGCC,MIR-24;GAGCCAG,MIR-149;GAGCTGG,MIR-337;GGCAGAC,MIR-346;GGCAGCT,MIR-22;GGGGCCC,MIR-296;GGTGAAG,MIR-412;GSE10239_MEMORY_VS_DAY4.5_EFF_CD8_TCELL_UP;GSE10239_NAIVE_VS_DAY4.5_EFF_CD8_TCELL_UP;GSE11924_TFH_VS_TH2_CD4_TCELL_UP;GSE13229_IMM_VS_INTMATURE_NKCELL_DN;GSE13229_IMM_VS_MATURE_NKCELL_DN;GSE14308_TH17_VS_INDUCED_TREG_DN;GSE14308_TH2…	Alternativesplicing;Coiledcoil;Completeproteome;Phosphoprotein;Polymorphism;Referenceproteome
-0.806946	0.796455	0.696024	0.294746	0.745102	0.499956	-1.52453	NaN	NaN	2.25001	0.706566	-0.270253	NaN	1.50606	-0.22489	-0.0166031	NaN	-0.279009	1.59024	NaN	NaN	NaN	-1.62533	-0.913585	-0.188577	1.09276	0.932427	-0.0728578	0.471656	NaN	0.847213	NaN	0.547029	0.91307	0.397351	0.509342	0.111991	0.338269	S	2	___1			cell part;membrane		cell part;membrane		HOOK	AGCGCAG,MIR-191;AGGGCAG,MIR-18A;CAGGTG_V$E12_Q6;chr11q13;CTGAGCC,MIR-24;GAGCCAG,MIR-149;GAGCTGG,MIR-337;GGCAGAC,MIR-346;GGCAGCT,MIR-22;GGGGCCC,MIR-296;GGTGAAG,MIR-412;GSE10239_MEMORY_VS_DAY4.5_EFF_CD8_TCELL_UP;GSE10239_NAIVE_VS_DAY4.5_EFF_CD8_TCELL_UP;GSE11924_TFH_VS_TH2_CD4_TCELL_UP;GSE13229_IMM_VS_INTMATURE_NKCELL_DN;GSE13229_IMM_VS_MATURE_NKCELL_DN;GSE14308_TH17_VS_INDUCED_TREG_DN;GSE14308_TH2…	Alternativesplicing;Coiledcoil;Completeproteome;Phosphoprotein;Polymorphism;Referenceproteome
NaN	NaN	NaN	NaN	NaN	1.35664	NaN	NaN	1.50097	2.5755	NaN	NaN	NaN	NaN	1.01125	NaN	NaN	0.573976	2.14032	1.42248	NaN	NaN	NaN	NaN	NaN	1.21299	NaN	1.12822	NaN	NaN	NaN	NaN	0.908876	0.920152	1.35664	1.21299	-0.143647	0.398895	S	2	___1			cell part;membrane		cell part;membrane		HOOK	AGCGCAG,MIR-191;AGGGCAG,MIR-18A;CAGGTG_V$E12_Q6;chr11q13;CTGAGCC,MIR-24;GAGCCAG,MIR-149;GAGCTGG,MIR-337;GGCAGAC,MIR-346;GGCAGCT,MIR-22;GGGGCCC,MIR-296;GGTGAAG,MIR-412;GSE10239_MEMORY_VS_DAY4.5_EFF_CD8_TCELL_UP;GSE10239_NAIVE_VS_DAY4.5_EFF_CD8_TCELL_UP;GSE11924_TFH_VS_TH2_CD4_TCELL_UP;GSE13229_IMM_VS_INTMATURE_NKCELL_DN;GSE13229_IMM_VS_MATURE_NKCELL_DN;GSE14308_TH17_VS_INDUCED_TREG_DN;GSE14308_TH2…	Alternativesplicing;Coiledcoil;Completeproteome;Phosphoprotein;Polymorphism;Referenceproteome
-0.190074	NaN	-0.439771	-1.80248	NaN	-0.925321	-0.0917768	0.189046	0.354083	NaN	0.343961	0.0889945	0.254667	NaN	-0.152744	-0.111501	-0.141795	0.504106	0.0258304	0.22861	0.253822	NaN	-0.350859	NaN	0.795507	-1.02465	NaN	0.110482	NaN	0.207787	-0.114314	-0.945465	NaN	0.771999	-0.101639	0.0681564	0.169795	0.285943	S	2	___1	biological regulation;biosynthetic process;cellular biosynthetic process;cellular macromolecule biosynthetic process;cellular macromolecule metabolic process;cellular metabolic process;cellular nitrogen compound metabolic process;cellular process;macromolecule biosynthetic process;macromolecule metabolic process;metabolic process;nitrogen compound metabolic process;nucleic acid metabolic process;…	binding;cation binding;DNA binding;ion binding;metal ion binding;nucleic acid binding	cell part;intracellular membrane-bounded organelle;intracellular organelle;intracellular part;membrane-bounded organelle;nucleus;organelle	biological regulation;biosynthetic process;cellular metabolic process;cellular nitrogen compound metabolic process;cellular process;macromolecule metabolic process;metabolic process;nitrogen compound metabolic process;nucleobase-containing compound metabolic process;primary metabolic process;RNA metabolic process	cell part;intracellular membrane-bounded organelle;intracellular organelle;nucleus;organelle		KRAB;zf-C2H2	chr7p22;CHYLA_CBFA2T3_TARGETS_DN;CRX_NRL_DN.V1_DN;GINESTIER_BREAST_CANCER_20Q13_AMPLIFICATION_DN;GINESTIER_BREAST_CANCER_ZNF217_AMPLIFIED_DN;GSE15659_CD45RA_NEG_CD4_TCELL_VS_ACTIVATED_TREG_DN;GSE15659_CD45RA_NEG_CD4_TCELL_VS_NONSUPPRESSIVE_TCELL_DN;NRL_DN.V1_DN;OSMAN_BLADDER_CANCER_UP	Acetylation;Completeproteome;DNA-binding;Metal-binding;Nucleus;Phosphoprotein;Referenceproteome;Repeat;Transcription;Transcriptionregulation;Zinc;Zinc-finger
0.274607	0.373195	0.082457	-0.796801	-0.173467	-0.113014	0.317817	0.38756	0.377932	0.227356	-0.0232058	0.208135	0.206671	NaN	-0.297706	0.605834	0	0.738705	0.488873	0.308512	0.214331	0.720927	0.0305645	0.566181	0.733789	-1.08609	-1.02049	0.289949	NaN	-0.109623	0.64065	NaN	-0.813629	0.743118	0.208135	0.289949	0.0818146	0.366972	S	3	___1	biological regulation;biosynthetic process;cellular biosynthetic process;cellular macromolecule biosynthetic process;cellular macromolecule metabolic process;cellular metabolic process;cellular nitrogen compound metabolic process;cellular process;macromolecule biosynthetic process;macromolecule metabolic process;metabolic process;nitrogen compound metabolic process;nucleic acid metabolic process;…	binding;cation binding;DNA binding;ion binding;metal ion binding;nucleic acid binding	cell part;intracellular membrane-bounded organelle;intracellular organelle;intracellular part;membrane-bounded organelle;nucleus;organelle	biological regulation;biosynthetic process;cellular metabolic process;cellular nitrogen compound metabolic process;cellular process;macromolecule metabolic process;metabolic process;nitrogen compound metabolic process;nucleobase-containing compound metabolic process;primary metabolic process;RNA metabolic process	cell part;intracellular membrane-bounded organelle;intracellular organelle;nucleus;organelle		KRAB;zf-C2H2	chr7p22;CHYLA_CBFA2T3_TARGETS_DN;CRX_NRL_DN.V1_DN;GINESTIER_BREAST_CANCER_20Q13_AMPLIFICATION_DN;GINESTIER_BREAST_CANCER_ZNF217_AMPLIFIED_DN;GSE15659_CD45RA_NEG_CD4_TCELL_VS_ACTIVATED_TREG_DN;GSE15659_CD45RA_NEG_CD4_TCELL_VS_NONSUPPRESSIVE_TCELL_DN;NRL_DN.V1_DN;OSMAN_BLADDER_CANCER_UP	Acetylation;Completeproteome;DNA-binding;Metal-binding;Nucleus;Phosphoprotein;Referenceproteome;Repeat;Transcription;Transcriptionregulation;Zinc;Zinc-finger
-4.10076	-3.60487	-5.99041	-4.74069	-5.00808	-5.30418	-2.91694	-5.55848	-5.34439	-6.381	-6.36601	-6.00328	-4.20224	-5.03932	-5.29598	-3.85873	-1.90635	-5.07424	-3.6601	0.24144	-3.52597	-4.02695	-5.17398	-4.14324	-5.21064	-5.06354	-4.35344	-5.2057	-4.14782	-4.99108	-5.16665	-3.55162	-2.43972	0.10222	-5.05678	-4.14782	0.908968	0.0069676	S	2	___1	anatomical structure development;biological adhesion;biological regulation;biosynthetic process;cartilage condensation;cell adhesion;cell differentiation;cell proliferation;cell-cell adhesion;cellular biosynthetic process;cellular developmental process;cellular macromolecule biosynthetic process;cellular macromolecule metabolic process;cellular metabolic process;cellular nitrogen compound metabol…	binding;DNA binding;nucleic acid binding;sequence-specific DNA binding	cell part;intracellular membrane-bounded organelle;intracellular organelle;intracellular part;membrane-bounded organelle;nucleus;organelle	anatomical structure development;biological adhesion;biological regulation;biosynthetic process;cell adhesion;cell differentiation;cell proliferation;cellular metabolic process;cellular nitrogen compound metabolic process;cellular process;developmental process;macromolecule metabolic process;metabolic process;nitrogen compound metabolic process;nucleobase-containing compound metabolic process;pri…	cell part;intracellular membrane-bounded organelle;intracellular organelle;nucleus;organelle		Homeobox	AFFAR_YY1_TARGETS_UP;BAKKER_FOXO3_TARGETS_UP;BRUINS_UVC_RESPONSE_VIA_TP53_GROUP_A;chr7p22;GSE17721_CTRL_VS_PAM3CSK4_1H_BMDM_DN;GSE27786_LSK_VS_ERYTHROBLAST_DN;GSE5960_TH1_VS_ANERGIC_TH1_UP;MANTOVANI_VIRAL_GPCR_SIGNALING_DN;MARTENS_TRETINOIN_RESPONSE_DN;MARTORIATI_MDM4_TARGETS_NEUROEPITHELIUM_DN;MEISSNER_BRAIN_HCP_WITH_H3K27ME3;MEISSNER_NPC_HCP_WITH_H3K4ME2_AND_H3K27ME3;MIKKELSEN_IPS_WITH_HCP_H3K2…	Completeproteome;Developmentalprotein;Differentiation;DNA-binding;Homeobox;Neurogenesis;Nucleus;Referenceproteome;Transcription;Transcriptionregulation
NaN	NaN	-0.548277	NaN	NaN	NaN	NaN	-0.0979619	NaN	NaN	NaN	NaN	-0.723776	-0.464397	NaN	NaN	NaN	0.21898	0.177863	NaN	NaN	NaN	0.611104	-0.851744	0.595419	NaN	NaN	NaN	NaN	-1.03425	-0.157948	-0.502447	NaN	0.615426	-0.464397	-0.157948	0.306449	0.18	S	2	___1	biological regulation;biosynthetic process;carbohydrate metabolic process;carbohydrate transport;cell cycle;cell cycle process;cell surface receptor linked signaling pathway;cellular biosynthetic process;cellular component disassembly;cellular component disassembly at cellular level;cellular component organization;cellular component organization at cellular level;cellular component organization o…	binding;catalytic activity;cation binding;cis-trans isomerase activity;enzyme binding;GTPase binding;ion binding;isomerase activity;ligase activity;metal ion binding;nucleic acid binding;peptidyl-prolyl cis-trans isomerase activity;protein binding;Ran GTPase binding;Ras GTPase binding;RNA binding;small GTPase binding;transition metal ion binding;zinc ion binding	cell part;cytoplasmic part;cytosol;inclusion body;intracellular membrane-bounded organelle;intracellular organelle;intracellular organelle part;intracellular part;macromolecular complex;membrane;membrane part;membrane-bounded organelle;mitochondrion;nuclear inclusion body;nuclear membrane;nuclear part;nuclear pore;organelle;organelle membrane;organelle part;pore complex;protein complex	biological regulation;biosynthetic process;carbohydrate metabolic process;carbohydrate transport;cell cycle;cellular component disassembly;cellular component organization;cellular membrane organization;cellular metabolic process;cellular nitrogen compound metabolic process;cellular process;establishment of localization;Golgi vesicle transport;macromolecule metabolic process;macromolecule modifica…	cell part;cytosol;intracellular membrane-bounded organelle;intracellular organelle;macromolecular complex;membrane;mitochondrion;nuclear pore;organelle;protein complex	RNA transport	GRIP;IR1-M;Pro_isomerase;Ran_BP1;TPR_1;zf-RanBP	AAGCAAT,MIR-137;ABRAMSON_INTERACT_WITH_AIRE;ACACTGG,MIR-199A,MIR-199B;ACCAAAG,MIR-9;ACTACCT,MIR-196A,MIR-196B;ATATGCA,MIR-448;BLALOCK_ALZHEIMERS_DISEASE_DN;BLALOCK_ALZHEIMERS_DISEASE_INCIPIENT_DN;BONOME_OVARIAN_CANCER_SURVIVAL_SUBOPTIMAL_DEBULKING;CELLULAR_LOCALIZATION;chr2q12;chr2q13;CTACCTC,LET-7A,LET-7B,LET-7C,LET-7D,LET-7E,LET-7F,MIR-98,LET-7G,LET-7I;DACOSTA_UV_RESPONSE_VIA_ERCC3_DN;DACOSTA_U…	3D-structure;Acetylation;Coiledcoil;Completeproteome;Disulfidebond;Isopeptidebond;Ligase;Membrane;Metal-binding;mRNAtransport;Nuclearporecomplex;Nucleus;Phosphoprotein;Polymorphism;Proteintransport;Referenceproteome;Repeat;RNA-binding;TPRrepeat;Translocation;Transport;Ublconjugation;Ublconjugationpathway;Zinc;Zinc-finger
-0.488798	NaN	-0.180099	NaN	-0.356716	NaN	-1.20981	-0.628624	-0.577264	NaN	-1.59097	NaN	NaN	NaN	NaN	-0.791903	NaN	-0.833154	NaN	NaN	NaN	-1.08945	-0.487819	-1.0265	-0.903104	NaN	-1.34163	-0.759075	NaN	NaN	NaN	NaN	NaN	0.319248	-0.628624	-0.964803	-0.33618	0.2154	S	2	___1	biological regulation;biosynthetic process;carbohydrate metabolic process;carbohydrate transport;cell cycle;cell cycle process;cell surface receptor linked signaling pathway;cellular biosynthetic process;cellular component disassembly;cellular component disassembly at cellular level;cellular component organization;cellular component organization at cellular level;cellular component organization o…	binding;catalytic activity;cation binding;cis-trans isomerase activity;enzyme binding;GTPase binding;ion binding;isomerase activity;ligase activity;metal ion binding;nucleic acid binding;peptidyl-prolyl cis-trans isomerase activity;protein binding;Ran GTPase binding;Ras GTPase binding;RNA binding;small GTPase binding;transition metal ion binding;zinc ion binding	cell part;cytoplasmic part;cytosol;inclusion body;intracellular membrane-bounded organelle;intracellular organelle;intracellular organelle part;intracellular part;macromolecular complex;membrane;membrane part;membrane-bounded organelle;mitochondrion;nuclear inclusion body;nuclear membrane;nuclear part;nuclear pore;organelle;organelle membrane;organelle part;pore complex;protein complex	biological regulation;biosynthetic process;carbohydrate metabolic process;carbohydrate transport;cell cycle;cellular component disassembly;cellular component organization;cellular membrane organization;cellular metabolic process;cellular nitrogen compound metabolic process;cellular process;establishment of localization;Golgi vesicle transport;macromolecule metabolic process;macromolecule modifica…	cell part;cytosol;intracellular membrane-bounded organelle;intracellular organelle;macromolecular complex;membrane;mitochondrion;nuclear pore;organelle;protein complex	RNA transport	GRIP;IR1-M;Pro_isomerase;Ran_BP1;TPR_1;zf-RanBP	AAGCAAT,MIR-137;ABRAMSON_INTERACT_WITH_AIRE;ACACTGG,MIR-199A,MIR-199B;ACCAAAG,MIR-9;ACTACCT,MIR-196A,MIR-196B;ATATGCA,MIR-448;BLALOCK_ALZHEIMERS_DISEASE_DN;BLALOCK_ALZHEIMERS_DISEASE_INCIPIENT_DN;BONOME_OVARIAN_CANCER_SURVIVAL_SUBOPTIMAL_DEBULKING;CELLULAR_LOCALIZATION;chr2q12;chr2q13;CTACCTC,LET-7A,LET-7B,LET-7C,LET-7D,LET-7E,LET-7F,MIR-98,LET-7G,LET-7I;DACOSTA_UV_RESPONSE_VIA_ERCC3_DN;DACOSTA_U…	3D-structure;Acetylation;Coiledcoil;Completeproteome;Disulfidebond;Isopeptidebond;Ligase;Membrane;Metal-binding;mRNAtransport;Nuclearporecomplex;Nucleus;Phosphoprotein;Polymorphism;Proteintransport;Referenceproteome;Repeat;RNA-binding;TPRrepeat;Translocation;Transport;Ublconjugation;Ublconjugationpathway;Zinc;Zinc-finger
-0.479898	NaN	NaN	1.34555	1.89933	NaN	-0.278298	NaN	1.33223	NaN	2.13342	1.27694	-1.65263	NaN	NaN	0.851449	NaN	-0.469617	NaN	1.82024	NaN	NaN	1.64313	NaN	1.51738	0.607549	NaN	0.288313	0.820529	-1.09822	1.95534	1.0985	0.491668	0.522153	1.06419	0.959517	-0.104678	0.440931	S	3	___1	biological regulation;biosynthetic process;carbohydrate metabolic process;carbohydrate transport;cell cycle;cell cycle process;cell surface receptor linked signaling pathway;cellular biosynthetic process;cellular component disassembly;cellular component disassembly at cellular level;cellular component organization;cellular component organization at cellular level;cellular component organization o…		cell part;cytoplasmic part;endoplasmic reticulum membrane;endoplasmic reticulum part;envelope;intracellular organelle part;intracellular part;macromolecular complex;membrane;membrane part;nuclear envelope;nuclear membrane;nuclear part;nuclear pore;organelle envelope;organelle membrane;organelle part;pore complex;protein complex	biological regulation;biosynthetic process;carbohydrate metabolic process;carbohydrate transport;cell cycle;cellular component disassembly;cellular component organization;cellular membrane organization;cellular metabolic process;cellular nitrogen compound metabolic process;cellular process;establishment of localization;macromolecule metabolic process;macromolecule modification;membrane organizati…	cell part;macromolecular complex;membrane;nuclear envelope;nuclear pore;protein complex	RNA transport		AATGTGA,MIR-23A,MIR-23B;ACTGTGA,MIR-27A,MIR-27B;BENPORATH_CYCLING_GENES;BROWNE_HCMV_INFECTION_10HR_UP;CEBALLOS_TARGETS_OF_TP53_AND_MYC_DN;CHANG_POU5F1_TARGETS_DN;CHEMNITZ_RESPONSE_TO_PROSTAGLANDIN_E2_DN;chr7q11;CSR_EARLY_UP.V1_UP;CTAGGAA,MIR-384;DANG_REGULATED_BY_MYC_DN;DIRMEIER_LMP1_RESPONSE_LATE_UP;GACTGTT,MIR-212,MIR-132;GCM_MYST2;GENTILE_RESPONSE_CLUSTER_D3;GENTILE_UV_HIGH_DOSE_DN;GGCGGCA,MIR…	Alternativesplicing;Completeproteome;Endoplasmicreticulum;Membrane;mRNAtransport;Nuclearporecomplex;Nucleus;Phosphoprotein;Polymorphism;Proteintransport;Referenceproteome;Repeat;Translocation;Transmembrane;Transmembranehelix;Transport
1.98223	NaN	1.07506	1.00416	0.337283	0.75567	0.361693	-0.237543	0.278799	0.885621	0.454314	0.492028	NaN	1.57161	1.14113	1.55075	0.952082	-0.312549	0.738369	1.00179	2.31351	1.51806	0.728507	-0.423627	0.464882	1.32105	0.21812	-0.194954	0.329604	0.640472	-0.271348	NaN	0.0813228	0.529823	0.820645	0.552677	-0.267968	0.274426	S	2	___1	adaptive immune response;adaptive immune response based on somatic recombination of immune receptors built from immunoglobulin superfamily domains;biological adhesion;cell adhesion;cell gliding;cell migration;cell motility;cell-substrate adhesion;cellular component movement;cellular process;establishment of localization;establishment of localization in cell;exocytosis;immune effector process;immu…	adenyl nucleotide binding;adenyl ribonucleotide binding;ATP binding;binding;catalytic activity;hydrolase activity;hydrolase activity, acting on acid anhydrides;hydrolase activity, acting on acid anhydrides, in phosphorus-containing anhydrides;lipid binding;motor activity;nucleoside-triphosphatase activity;nucleotide binding;phosphatidylinositol binding;phosphatidylinositol-3,4,5-trisphosphate bin…	cell part;cell projection;cytoskeletal part;extracellular membrane-bounded organelle;extracellular organelle;extracellular region part;extracellular vesicular exosome;filopodium;intracellular organelle part;intracellular part;lamellipodium;leading edge membrane;macromolecular complex;membrane;membrane part;membrane-bounded organelle;membrane-bounded vesicle;microvillus;myosin complex;organelle;or…	biological adhesion;cell adhesion;cell motility;cellular component movement;cellular process;establishment of localization;exocytosis;immune system process;locomotion;response to stimulus;secretion;transport;vesicle-mediated transport	cell part;cell projection;extracellular organelle;filopodium;macromolecular complex;membrane;microvillus;organelle;plasma membrane;protein complex;vesicle		Myosin_head;Myosin_TH1	AKT_UP_MTOR_DN.V1_DN;BOSCO_INTERFERON_INDUCED_ANTIVIRAL_MODULE;chr7p13;FULCHER_INFLAMMATORY_RESPONSE_LECTIN_VS_LPS_DN;GOBERT_OLIGODENDROCYTE_DIFFERENTIATION_DN;GSE13306_RA_VS_UNTREATED_MEM_CD4_TCELL_DN;GSE17974_0H_VS_12H_IN_VITRO_ACT_CD4_TCELL_UP;GSE17974_0H_VS_4H_IN_VITRO_ACT_CD4_TCELL_UP;GSE17974_0H_VS_6H_IN_VITRO_ACT_CD4_TCELL_UP;GSE17974_CTRL_VS_ACT_IL4_AND_ANTI_IL12_12H_CD4_TCELL_UP;GSE17974…	Actin-binding;Adaptiveimmunity;Alternativesplicing;ATP-binding;Calmodulin-binding;Cellmembrane;Cellprojection;Completeproteome;Directproteinsequencing;Immunity;Lipid-binding;Membrane;Motorprotein;Myosin;Nucleotide-binding;Polymorphism;Referenceproteome
-1.4631	-1.2521	-1.61786	NaN	-1.43312	NaN	-1.17624	-0.448287	-1.09276	-1.15857	-1.16014	NaN	-1.22214	NaN	-0.708461	-1.61399	-1.72418	-0.908774	-1.03597	-0.362911	-1.26633	-0.826716	-1.48529	-1.1815	-0.594399	-1.90887	NaN	-0.90018	-1.13087	-0.272289	-1.3553	NaN	-1.33001	0.316639	-1.19919	-1.13087	0.0683253	0.380059	S	3	___1							FAM195	chr17p13;GCM_NF2;GSE17721_ALL_VS_24H_PAM3CSK4_BMDM_UP;GSE17721_CTRL_VS_PAM3CSK4_8H_BMDM_UP;GSE17721_CTRL_VS_POLYIC_2H_BMDM_UP;GSE17721_PAM3CSK4_VS_GADIQUIMOD_4H_BMDM_DN;GSE39820_CTRL_VS_TGFBETA3_IL6_IL23A_CD4_TCELL_DN;JIANG_HYPOXIA_CANCER;LASTOWSKA_NEUROBLASTOMA_COPY_NUMBER_UP;MCCABE_BOUND_BY_HOXC6	Acetylation;Completeproteome;Phosphoprotein;Referenceproteome
-2.13191	-1.71876	-1.15514	-0.876386	-1.34804	-0.96661	-1.12933	-1.72098	-1.37511	-1.06579	-1.50852	-1.40735	NaN	-1.36913	-1.18375	-2.35893	-2.40861	-1.54938	-0.762984	-0.506578	-1.39618	-1.24962	-1.63763	-1.45216	-1.32775	-0.676658	-2.11786	-1.69175	-1.11361	-1.22115	-0.900156	NaN	-0.850999	0.0964692	-1.37511	-1.23539	0.139727	0.312688	S	3	___1	anatomical structure development;anatomical structure morphogenesis;biological regulation;biosynthetic process;cardiac chamber development;cardiac ventricle development;cellular biosynthetic process;cellular macromolecule biosynthetic process;cellular macromolecule metabolic process;cellular metabolic process;cellular nitrogen compound metabolic process;cellular process;cellular protein metabolic…	binding;DNA binding;nucleic acid binding;protein binding;protein binding transcription factor activity;TBP-class protein binding;transcription coactivator activity;transcription cofactor activity;transcription factor binding;transcription factor binding transcription factor activity	cell part;cytoplasm;cytoplasmic part;extracellular membrane-bounded organelle;extracellular organelle;extracellular region part;extracellular vesicular exosome;intracellular membrane-bounded organelle;intracellular organelle;intracellular part;macromolecular complex;membrane-bounded organelle;membrane-bounded vesicle;nascent polypeptide-associated complex;nucleus;organelle;protein complex;vesicle	anatomical structure development;anatomical structure morphogenesis;biological regulation;biosynthetic process;cellular metabolic process;cellular nitrogen compound metabolic process;cellular process;developmental process;establishment of localization;growth;macromolecule metabolic process;metabolic process;nitrogen compound metabolic process;nucleobase-containing compound metabolic process;prima…	cell part;cytoplasm;extracellular organelle;intracellular membrane-bounded organelle;intracellular organelle;macromolecular complex;nucleus;organelle;protein complex;vesicle		NAC	BENPORATH_MYC_MAX_TARGETS;BIOSYNTHETIC_PROCESS;BOUDOUKHA_BOUND_BY_IGF2BP2;CAGCTG_V$AP4_Q5;CAGGTG_V$E12_Q6;CASORELLI_ACUTE_PROMYELOCYTIC_LEUKEMIA_UP;CELLULAR_BIOSYNTHETIC_PROCESS;CELLULAR_MACROMOLECULE_METABOLIC_PROCESS;CELLULAR_PROTEIN_METABOLIC_PROCESS;CHARAFE_BREAST_CANCER_LUMINAL_VS_BASAL_UP;chr12q23;CYTOPLASM;CYTOPLASMIC_PART;DANG_BOUND_BY_MYC;FEVR_CTNNB1_TARGETS_DN;FLECHNER_BIOPSY_KIDNEY_TRA…	3D-structure;Acetylation;Activator;Allergen;Alternativesplicing;Chaperone;Completeproteome;Cytoplasm;Directproteinsequencing;DNA-binding;Host-virusinteraction;Nucleus;Phosphoprotein;Polymorphism;Proteintransport;Referenceproteome;Repeat;Transcription;Transcriptionregulation;Transport
-1.25655	2.26888	1.53268	0.8252	-0.526538	1.02613	-0.727328	2.58296	-0.0126491	0.24213	1.48269	-0.00289732	-0.362389	1.86261	2.64027	NaN	0.569469	-1.7954	2.29952	1.536	NaN	NaN	-0.855994	-0.95009	NaN	1.96673	1.50755	1.43413	1.42224	0.199321	2.18912	NaN	0.845208	0.353006	0.569469	1.43413	0.864665	0.00950252	S	3	___1	biological regulation;establishment of localization;gas transport;metabolic process;oxidation-reduction process;oxygen transport;regulation of biological process;regulation of cellular process;regulation of response to stimulus;regulation of signal transduction;regulation of signaling;response to chemical stimulus;response to oxidative stress;response to stimulus;response to stress;transport	antioxidant activity;catalytic activity;oxidoreductase activity;oxidoreductase activity, acting on peroxide as acceptor;oxygen transporter activity;peroxidase activity;substrate-specific transporter activity;transporter activity	cell part;cytoplasm;intracellular part;membrane;plasma membrane	biological regulation;establishment of localization;gas transport;metabolic process;response to chemical stimulus;response to oxidative stress;response to stimulus;response to stress;transport	cell part;cytoplasm;membrane;plasma membrane		CRIC_ras_sig;DUF1170;PDZ;PH;SAM_1	ACEVEDO_LIVER_CANCER_WITH_H3K27ME3_UP;ACEVEDO_LIVER_CANCER_WITH_H3K9ME3_UP;ACTGAAA,MIR-30A-3P,MIR-30E-3P;ANTIOXIDANT_ACTIVITY;BHAT_ESR1_TARGETS_NOT_VIA_AKT1_UP;BHAT_ESR1_TARGETS_VIA_AKT1_UP;BOYLAN_MULTIPLE_MYELOMA_D_DN;BOYLAN_MULTIPLE_MYELOMA_PCA3_DN;CAGCTG_V$AP4_Q5;CHARAFE_BREAST_CANCER_BASAL_VS_MESENCHYMAL_DN;CHEMNITZ_RESPONSE_TO_PROSTAGLANDIN_E2_DN;CHICAS_RB1_TARGETS_CONFLUENT;chr6q25;CORRE_MU…	Alternativesplicing;Cellmembrane;Completeproteome;Cytoplasm;Membrane;Polymorphism;Proteomicsidentification;Referenceproteome
NaN	NaN	1.87687	NaN	1.23305	1.51393	NaN	NaN	NaN	1.095	NaN	1.84056	-0.122015	NaN	0.058028	0.789412	-1.15824	NaN	0.842888	NaN	NaN	NaN	NaN	-1.38399	NaN	-0.0516108	NaN	NaN	NaN	2.23666	1.09862	-0.544285	NaN	0.514043	1.095	0.395639	-0.699359	0.0366772	S	2	___1			cell part;integral to membrane;intrinsic to membrane;membrane part		cell part				Completeproteome;Membrane;Phosphoprotein;Referenceproteome;Transmembrane;Transmembranehelix
-0.580301	2.30129	2.99109	1.16035	NaN	1.58842	2.15419	1.65062	NaN	0.892245	2.11639	2.29239	1.37507	2.64884	2.54393	-0.270482	-0.396456	0.869437	1.93559	0.674262	-0.804872	1.06318	-2.05026	-0.601923	1.77536	2.22015	1.79178	1.70533	NaN	2.22967	1.13423	NaN	1.49764	0.297562	1.61952	1.49764	-0.121878	0.422265	S	2	___1			cell part;integral to membrane;intrinsic to membrane;membrane part		cell part				Completeproteome;Membrane;Phosphoprotein;Referenceproteome;Transmembrane;Transmembranehelix
-0.28329	NaN	2.03191	0.671506	0.646095	1.17805	1.21788	0.232242	-0.573408	1.13836	1.39647	1.69571	-0.13744	1.20745	1.10174	0.631342	-0.964059	-0.139147	0.552932	0.0341156	-0.256434	0.265875	-3.83849	-1.15699	0.418986	1.54616	0.921296	0.526336	0.52735	2.15195	1.34328	0.417797	0.52178	0.355873	0.671506	0.52178	-0.149726	0.392428	S	3	___1			cell part;integral to membrane;intrinsic to membrane;membrane part		cell part				Completeproteome;Membrane;Phosphoprotein;Referenceproteome;Transmembrane;Transmembranehelix
-0.0526346	0.420511	1.35557	0.814102	0.877637	0.897377	0.700023	NaN	-0.721129	0.613982	0.852382	2.12229	-0.307702	1.0852	NaN	1.22124	NaN	-0.0090851	0.210446	NaN	NaN	NaN	NaN	-1.48375	-0.238666	0.911766	NaN	-0.513901	0.309472	2.38163	1.20148	NaN	0.0020239	0.412944	0.814102	0.210446	-0.603657	0.0634588	S	2	___1			cell part;integral to membrane;intrinsic to membrane;membrane part		cell part				Completeproteome;Membrane;Phosphoprotein;Referenceproteome;Transmembrane;Transmembranehelix
-0.167581	2.09624	1.64042	0.787439	0.949501	0.882167	1.42993	0.234025	-0.339252	0.92244	1.15904	1.69529	0.198475	1.64035	0.851068	0.82631	NaN	-0.206395	NaN	0.00670017	NaN	NaN	-3.70974	-0.989833	0.341813	1.32738	1.18721	0.343393	NaN	2.0811	0.763208	NaN	0.393592	0.225965	0.882167	0.368492	-0.513675	0.10064	S	2	___1			cell part;integral to membrane;intrinsic to membrane;membrane part		cell part				Completeproteome;Membrane;Phosphoprotein;Referenceproteome;Transmembrane;Transmembranehelix
0.627804	NaN	-0.507785	NaN	-1.58643	-1.43084	0.276022	2.07535	-0.805763	NaN	NaN	NaN	0.692754	NaN	NaN	NaN	3.22482	NaN	NaN	NaN	-1.00812	NaN	-1.96856	-1.054	NaN	NaN	NaN	NaN	NaN	-0.528416	-1.16263	1.05467	NaN	0.13861	0.276022	-1.03106	-1.30708	0.000261551	S	3	___1	biosynthetic process;cellular biosynthetic process;cellular lipid metabolic process;cellular metabolic process;cellular process;ether lipid biosynthetic process;ether lipid metabolic process;glycerol ether biosynthetic process;glycerol ether metabolic process;glycerolipid biosynthetic process;glycerolipid metabolic process;lipid biosynthetic process;lipid metabolic process;metabolic process;organ…	alkylglycerone-phosphate synthase activity;binding;catalytic activity;coenzyme binding;cofactor binding;FAD binding;flavin adenine dinucleotide binding;oxidoreductase activity;oxidoreductase activity, acting on CH-OH group of donors;oxidoreductase activity, acting on the CH-OH group of donors, NAD or NADP as acceptor;transferase activity;transferase activity, transferring alkyl or aryl (other tha…	cell part;cytoplasmic part;intracellular membrane-bounded organelle;intracellular non-membrane-bounded organelle;intracellular organelle;intracellular organelle lumen;intracellular organelle part;intracellular part;membrane;membrane-bounded organelle;membrane-enclosed lumen;microbody;microbody lumen;microbody membrane;microbody part;mitochondrion;non-membrane-bounded organelle;nuclear part;nucleo…	biosynthetic process;cellular lipid metabolic process;cellular metabolic process;cellular process;glycerol ether metabolic process;lipid metabolic process;metabolic process;primary metabolic process;small molecule metabolic process	cell part;intracellular membrane-bounded organelle;intracellular non-membrane-bounded organelle;intracellular organelle;membrane;microbody;mitochondrion;nucleolus;organelle;peroxisome	Ether lipid metabolism;Peroxisome	FAD_binding_4;FAD-oxidase_C	BECKER_TAMOXIFEN_RESISTANCE_DN;BENPORATH_MYC_MAX_TARGETS;BIOSYNTHETIC_PROCESS;CAGGTA_V$AREB6_01;CAIRO_HEPATOBLASTOMA_CLASSES_UP;CELLULAR_LIPID_METABOLIC_PROCESS;CHARAFE_BREAST_CANCER_LUMINAL_VS_BASAL_DN;CHARAFE_BREAST_CANCER_LUMINAL_VS_MESENCHYMAL_DN;CHIARETTI_ACUTE_LYMPHOBLASTIC_LEUKEMIA_ZAP70;chr2q;CYTOPLASM;CYTOPLASMIC_PART;DANG_BOUND_BY_MYC;DIAZ_CHRONIC_MEYLOGENOUS_LEUKEMIA_UP;DURCHDEWALD_SKI…	Acetylation;Cataract;Completeproteome;Diseasemutation;Dwarfism;FAD;Flavoprotein;Lipidbiosynthesis;Lipidmetabolism;Membrane;Peroxisome;Phosphoprotein;Referenceproteome;Rhizomelicchondrodysplasiapunctata;Transferase;Transitpeptide
0.783641	NaN	NaN	NaN	NaN	NaN	1.54593	1.4375	NaN	0.837786	NaN	1.51284	NaN	NaN	0.654605	NaN	NaN	1.3591	NaN	0.854408	-0.890875	NaN	0.501668	0.197478	-1.41361	NaN	NaN	1.61754	NaN	NaN	0.742669	NaN	NaN	0.0603582	1.3591	0.501668	-0.857435	0.0129705	S	3	___1	biological regulation;cellular macromolecule metabolic process;cellular metabolic process;cellular nitrogen compound metabolic process;cellular process;cellular response to stimulus;cellular response to stress;establishment of localization;establishment of localization in cell;establishment of RNA localization;intracellular transport;macromolecule metabolic process;metabolic process;mRNA export f…	adenyl nucleotide binding;adenyl ribonucleotide binding;ATP binding;ATPase activity;ATPase activity, coupled;ATP-dependent helicase activity;ATP-dependent RNA helicase activity;binding;catalytic activity;helicase activity;hydrolase activity;hydrolase activity, acting on acid anhydrides;hydrolase activity, acting on acid anhydrides, in phosphorus-containing anhydrides;nucleoside-triphosphatase act…	cell part;cytoplasm;intracellular membrane-bounded organelle;intracellular non-membrane-bounded organelle;intracellular organelle;intracellular organelle part;intracellular part;macromolecular complex;membrane;membrane-bounded organelle;non-membrane-bounded organelle;nuclear part;nucleolus;nucleus;organelle;organelle part;ribonucleoprotein complex;spliceosomal complex	biological regulation;cellular metabolic process;cellular nitrogen compound metabolic process;cellular process;establishment of localization;macromolecule metabolic process;metabolic process;mRNA metabolic process;mRNA processing;nitrogen compound metabolic process;nuclear transport;nucleobase-containing compound metabolic process;nucleobase-containing compound transport;nucleocytoplasmic transpo…	cell part;cytoplasm;intracellular membrane-bounded organelle;intracellular non-membrane-bounded organelle;intracellular organelle;macromolecular complex;membrane;nucleolus;nucleus;organelle;ribonucleoprotein complex;spliceosomal complex		DEAD;Helicase_C	AGCTCCT,MIR-28;ATP_DEPENDENT_HELICASE_ACTIVITY;ATP_DEPENDENT_RNA_HELICASE_ACTIVITY;ATPASE_ACTIVITY;ATPASE_ACTIVITY_COUPLED;BASAKI_YBX1_TARGETS_UP;BENPORATH_NANOG_TARGETS;BENPORATH_SOX2_TARGETS;BIOPOLYMER_METABOLIC_PROCESS;BLALOCK_ALZHEIMERS_DISEASE_UP;BLUM_RESPONSE_TO_SALIRASIB_DN;BROWNE_HCMV_INFECTION_14HR_UP;CAIRO_HEPATOBLASTOMA_CLASSES_UP;CELLULAR_LOCALIZATION;chr19p13;chr6p21;CTTTGA_V$LEF1_Q2…	Acetylation;Alternativesplicing;ATP-binding;Completeproteome;Cytoplasm;Helicase;Hydrolase;mRNAprocessing;mRNAsplicing;Nucleotide-binding;Nucleus;Phosphoprotein;Polymorphism;Referenceproteome;RNA-binding
-2.98473	NaN	NaN	NaN	NaN	-4.73097	NaN	-2.99487	NaN	NaN	-6.45644	-5.74589	-3.45771	NaN	NaN	NaN	NaN	NaN	-4.59408	-3.20726	-3.67849	-5.15027	NaN	-4.61257	NaN	-4.34676	NaN	-4.93464	-4.20367	NaN	-4.88826	-3.20037	NaN	0.865918	-4.09434	-4.47042	-0.376077	0.184596	S	2	___1	biological regulation;cellular macromolecule metabolic process;cellular metabolic process;cellular nitrogen compound metabolic process;cellular process;cellular response to stimulus;cellular response to stress;establishment of localization;establishment of localization in cell;establishment of RNA localization;intracellular transport;macromolecule metabolic process;metabolic process;mRNA export f…	adenyl nucleotide binding;adenyl ribonucleotide binding;ATP binding;ATPase activity;ATPase activity, coupled;ATP-dependent helicase activity;ATP-dependent RNA helicase activity;binding;catalytic activity;helicase activity;hydrolase activity;hydrolase activity, acting on acid anhydrides;hydrolase activity, acting on acid anhydrides, in phosphorus-containing anhydrides;nucleoside-triphosphatase act…	cell part;cytoplasm;intracellular membrane-bounded organelle;intracellular non-membrane-bounded organelle;intracellular organelle;intracellular organelle part;intracellular part;macromolecular complex;membrane;membrane-bounded organelle;non-membrane-bounded organelle;nuclear part;nucleolus;nucleus;organelle;organelle part;ribonucleoprotein complex;spliceosomal complex	biological regulation;cellular metabolic process;cellular nitrogen compound metabolic process;cellular process;establishment of localization;macromolecule metabolic process;metabolic process;mRNA metabolic process;mRNA processing;nitrogen compound metabolic process;nuclear transport;nucleobase-containing compound metabolic process;nucleobase-containing compound transport;nucleocytoplasmic transpo…	cell part;cytoplasm;intracellular membrane-bounded organelle;intracellular non-membrane-bounded organelle;intracellular organelle;macromolecular complex;membrane;nucleolus;nucleus;organelle;ribonucleoprotein complex;spliceosomal complex		DEAD;Helicase_C	AGCTCCT,MIR-28;ATP_DEPENDENT_HELICASE_ACTIVITY;ATP_DEPENDENT_RNA_HELICASE_ACTIVITY;ATPASE_ACTIVITY;ATPASE_ACTIVITY_COUPLED;BASAKI_YBX1_TARGETS_UP;BENPORATH_NANOG_TARGETS;BENPORATH_SOX2_TARGETS;BIOPOLYMER_METABOLIC_PROCESS;BLALOCK_ALZHEIMERS_DISEASE_UP;BLUM_RESPONSE_TO_SALIRASIB_DN;BROWNE_HCMV_INFECTION_14HR_UP;CAIRO_HEPATOBLASTOMA_CLASSES_UP;CELLULAR_LOCALIZATION;chr19p13;chr6p21;CTTTGA_V$LEF1_Q2…	Acetylation;Alternativesplicing;ATP-binding;Completeproteome;Cytoplasm;Helicase;Hydrolase;mRNAprocessing;mRNAsplicing;Nucleotide-binding;Nucleus;Phosphoprotein;Polymorphism;Referenceproteome;RNA-binding
-0.623592	-0.589461	-0.243558	-0.145038	-0.395793	-0.128564	-0.993952	NaN	-0.524382	0.176085	NaN	NaN	NaN	NaN	0.277315	0.151611	-0.170581	-0.406425	NaN	0.515647	NaN	NaN	-0.543907	0.996133	-0.258774	NaN	NaN	NaN	NaN	-0.59108	-1.14778	NaN	1.11252	0.425535	-0.243558	-0.258774	-0.0152153	0.463625	S	2	___1	amine transport;biological regulation;cellular component assembly;cellular component assembly at cellular level;cellular component organization;cellular component organization at cellular level;cellular component organization or biogenesis;cellular component organization or biogenesis at cellular level;cellular macromolecular complex assembly;cellular macromolecular complex subunit organization;c…	binding;protein binding;SNAP receptor activity;SNARE binding;syntaxin binding	adherens junction;anchoring junction;azurophil granule;cell junction;cell part;cell projection;cell-substrate adherens junction;cell-substrate junction;cytoplasm;cytoplasmic membrane-bounded vesicle;cytoplasmic part;cytoplasmic vesicle;extracellular membrane-bounded organelle;extracellular organelle;extracellular region part;extracellular vesicular exosome;focal adhesion;intracellular membrane-bo…	amine transport;biological regulation;cellular component assembly;cellular component organization;cellular macromolecular complex assembly;cellular membrane organization;cellular process;establishment of localization;Golgi vesicle transport;hormone transport;macromolecular complex assembly;membrane fusion;membrane organization;organelle fusion;organelle organization;protein complex assembly;prote…	cell part;cell projection;cytoplasm;cytoplasmic membrane-bounded vesicle;extracellular organelle;intracellular membrane-bounded organelle;intracellular organelle;lysosome;macromolecular complex;membrane;neuron projection;nucleoplasm;organelle;plasma membrane;protein complex;synapse;vacuole;vesicle	SNARE interactions in vesicular transport	SNAP-25;SNARE	BRUINS_UVC_RESPONSE_EARLY_LATE;BRUNO_HEMATOPOIESIS;BUYTAERT_PHOTODYNAMIC_THERAPY_STRESS_UP;BYSTRYKH_HEMATOPOIESIS_STEM_CELL_QTL_TRANS;CELLULAR_LOCALIZATION;chr15q14;CHUNG_BLISTER_CYTOTOXICITY_DN;CROONQUIST_NRAS_VS_STROMAL_STIMULATION_UP;CUI_TCF21_TARGETS_2_DN;CYTOSKELETON_ORGANIZATION_AND_BIOGENESIS;DIAZ_CHRONIC_MEYLOGENOUS_LEUKEMIA_UP;ESTABLISHMENT_OF_CELLULAR_LOCALIZATION;ESTABLISHMENT_OF_LOCAL…	3D-structure;Acetylation;Alternativesplicing;Celljunction;Cellmembrane;Coiledcoil;Completeproteome;Directproteinsequencing;Lipoprotein;Membrane;Palmitate;Phosphoprotein;Proteintransport;Referenceproteome;Repeat;Synapse;Synaptosome;Transport
-0.597441	NaN	0.359771	0.402817	NaN	NaN	-0.29122	NaN	NaN	NaN	NaN	NaN	NaN	NaN	NaN	-0.219562	NaN	0.128243	NaN	-0.36637	-0.689149	NaN	NaN	0.342611	-0.00469933	NaN	NaN	NaN	NaN	0.83625	NaN	-0.225263	0.232924	0.832433	-0.0456592	-0.00469933	0.0409599	0.407019	S	2	___1							SMAP		Acetylation;Completeproteome;Phosphoprotein;Referenceproteome
-0.803084	0.626903	0.32192	0.261437	0.251116	0.288646	-0.304758	-0.11845	0.0202767	0.57307	0.483923	0.629972	0.409173	0.769967	0.635442	-0.575171	-1.07018	0.283563	-0.0226051	0.0189545	-0.692695	0.452481	0.103539	0.555972	0.1355	0.297557	0.546749	0.05052	0.27244	0.778586	0.352854	0.0184373	0.297474	0.68783	0.286105	0.27244	-0.0136652	0.462047	S	2	___1							SMAP		Acetylation;Completeproteome;Phosphoprotein;Referenceproteome
0.401718	0.181998	NaN	NaN	0.0364632	0.512851	0.0747344	-0.00118576	NaN	-0.0306766	NaN	-0.182724	-0.401313	NaN	-0.0827224	NaN	0.540045	-0.126152	0.291583	-0.338046	-0.673788	0.0704637	-0.865308	-0.422928	-0.528246	0.225042	NaN	NaN	NaN	-0.0991093	0.363248	NaN	-0.0366389	0.098384	0.0176387	-0.0991093	-0.116748	0.427816	S	3	___1	anterograde axon cargo transport;anterograde synaptic vesicle transport;antigen processing and presentation;antigen processing and presentation of exogenous antigen;antigen processing and presentation of lipid antigen via MHC class Ib;antigen processing and presentation via MHC class Ib;antigen processing and presentation, exogenous lipid antigen via MHC class Ib;axon cargo transport;biological r…	binding;enzyme binding;GTP-dependent protein binding;phosphatase binding;protein binding;protein phosphatase binding	AP-3 adaptor complex;AP-type membrane coat adaptor complex;cell part;clathrin coated vesicle membrane;coated vesicle membrane;cytoplasmic part;cytoplasmic vesicle membrane;cytoplasmic vesicle part;Golgi apparatus;intracellular membrane-bounded organelle;intracellular organelle;intracellular organelle part;intracellular part;lysosomal membrane;macromolecular complex;membrane;membrane part;membrane…	biological regulation;cellular component movement;cellular component organization;cellular process;coagulation;cytoskeleton-dependent intracellular transport;establishment of localization;immune system process;multicellular organismal process;organelle organization;pigment granule organization;protein targeting;protein transport;regulation of body fluid levels;transport;vacuolar transport;vesicle…	AP-type membrane coat adaptor complex;cell part;Golgi apparatus;intracellular membrane-bounded organelle;intracellular organelle;macromolecular complex;membrane;organelle;protein complex	Lysosome	Adaptin_N;AP3B1_C;SEEEED	ACCAAAG,MIR-9;ACEVEDO_LIVER_TUMOR_VS_NORMAL_ADJACENT_TISSUE_UP;ATCATGA,MIR-433;BAELDE_DIABETIC_NEPHROPATHY_DN;BENPORATH_NANOG_TARGETS;BENPORATH_SOX2_TARGETS;BORCZUK_MALIGNANT_MESOTHELIOMA_UP;CELLULAR_LOCALIZATION;chr5q14;CYCLIN_D1_UP.V1_DN;CYTOPLASM;CYTOPLASMIC_PART;DACOSTA_UV_RESPONSE_VIA_ERCC3_DN;DIAZ_CHRONIC_MEYLOGENOUS_LEUKEMIA_UP;ESTABLISHMENT_OF_CELLULAR_LOCALIZATION;ESTABLISHMENT_OF_LOCALI…	Albinism;Alternativesplicing;Completeproteome;Cytoplasmicvesicle;Diseasemutation;Golgiapparatus;Hermansky-Pudlaksyndrome;Membrane;Phosphoprotein;Proteintransport;Referenceproteome;Transport
NaN	NaN	NaN	NaN	-0.393272	NaN	0.396025	2.78624	NaN	NaN	1.32433	0.557091	NaN	-0.0199338	2.16303	NaN	NaN	0.0947887	1.0795	0.432371	NaN	0.00376332	1.47125	1.54593	NaN	0.56698	NaN	2.83286	NaN	NaN	-0.163818	NaN	NaN	0.841481	0.476558	0.823239	0.346681	0.154236	S	2	___1	activation of immune response;activation of innate immune response;anaphase-promoting complex-dependent proteasomal ubiquitin-dependent protein catabolic process;antigen processing and presentation;antigen processing and presentation of exogenous antigen;antigen processing and presentation of exogenous peptide antigen;antigen processing and presentation of exogenous peptide antigen via MHC class …		cell part;cytoplasmic part;cytosol;extracellular membrane-bounded organelle;extracellular organelle;extracellular region part;extracellular vesicular exosome;intracellular membrane-bounded organelle;intracellular organelle;intracellular organelle part;intracellular part;macromolecular complex;membrane;membrane-bounded organelle;membrane-bounded vesicle;nuclear part;nucleoplasm;nucleus;organelle;o…	biological regulation;catabolic process;cell cycle;cell death;cell differentiation;cellular component assembly;cellular component organization;cellular macromolecular complex assembly;cellular metabolic process;cellular nitrogen compound metabolic process;cellular process;death;developmental process;immune system process;macromolecular complex assembly;macromolecule metabolic process;macromolecul…	cell part;cytosol;extracellular organelle;intracellular membrane-bounded organelle;intracellular organelle;macromolecular complex;membrane;nucleoplasm;nucleus;organelle;proteasome complex;protein complex;vesicle	Proteasome	PCI	AACTTT_UNKNOWN;ACTAYRNNNCCCR_UNKNOWN;ACTWSNACTNY_UNKNOWN;ASTON_MAJOR_DEPRESSIVE_DISORDER_DN;ATTCTTT,MIR-186;BENPORATH_CYCLING_GENES;BERENJENO_TRANSFORMED_BY_RHOA_UP;BIOCARTA_PROTEASOME_PATHWAY;BLALOCK_ALZHEIMERS_DISEASE_DN;BOYAULT_LIVER_CANCER_SUBCLASS_G3_UP;BROWNE_HCMV_INFECTION_48HR_UP;BYSTRYKH_HEMATOPOIESIS_STEM_CELL_QTL_TRANS;CATGTAA,MIR-496;chr17q12;CONCANNON_APOPTOSIS_BY_EPOXOMICIN_UP;CTTTG…	Acetylation;Alternativesplicing;Completeproteome;Cytoplasm;Directproteinsequencing;Nucleus;Phosphoprotein;Proteasome;Referenceproteome
NaN	2.21927	NaN	1.28205	1.23467	1.53673	2.28235	NaN	2.2052	NaN	1.86534	2.66997	3.43514	1.85771	2.0842	NaN	3.47648	1.92676	3.56629	NaN	NaN	NaN	2.60164	NaN	NaN	0.936981	NaN	2.68374	1.59711	NaN	4.22428	3.57118	NaN	0.260949	2.0842	2.68374	0.599538	0.0478353	S	2	___1	anatomical structure development;anatomical structure morphogenesis;biological regulation;biosynthetic process;brain development;cell cycle arrest;cell cycle process;cell development;cell fate commitment;cell surface receptor linked signaling pathway;cellular biosynthetic process;cellular component organization;cellular component organization at cellular level;cellular component organization or b…	binding;binding, bridging;chromatin binding;DNA binding;DNA secondary structure binding;double-stranded DNA binding;four-way junction DNA binding;nucleic acid binding;protein binding;protein binding, bridging;protein N-terminus binding;regulatory region DNA binding;regulatory region nucleic acid binding;R-SMAD binding;sequence-specific DNA binding;SMAD binding;structure-specific DNA binding;trans…	cell division site part;cell part;chromatin;chromosomal part;cleavage furrow;cytoplasm;cytoplasmic part;cytosol;histone methyltransferase complex;intracellular membrane-bounded organelle;intracellular organelle;intracellular organelle part;intracellular part;macromolecular complex;membrane-bounded organelle;methyltransferase complex;nuclear matrix;nuclear part;nucleoplasm;nucleoplasm part;nucleus…	anatomical structure development;anatomical structure morphogenesis;biological regulation;biosynthetic process;cell development;cellular component organization;cellular metabolic process;cellular nitrogen compound metabolic process;cellular process;chromatin modification;chromatin organization;chromosome organization;developmental process;DNA metabolic process;DNA repair;histone modification;home…	cell part;cytoplasm;cytosol;histone methyltransferase complex;intracellular membrane-bounded organelle;intracellular organelle;macromolecular complex;nucleoplasm;nucleus;organelle;protein complex		Menin	BIOPOLYMER_METABOLIC_PROCESS;chr11q13;CTGAGCC,MIR-24;CYTOPLASM;CYTOPLASMIC_PART;CYTOSOL;DANG_BOUND_BY_MYC;DEBIASI_APOPTOSIS_BY_REOVIRUS_INFECTION_DN;DIAZ_CHRONIC_MEYLOGENOUS_LEUKEMIA_UP;FERNANDEZ_BOUND_BY_MYC;GATTGGY_V$NFY_Q6_01;GCM_HDAC1;GCM_TPR;GGGAGGRR_V$MAZ_Q6;GRESHOCK_CANCER_COPY_NUMBER_UP;GSE10325_BCELL_VS_MYELOID_UP;GSE12845_NAIVE_VS_DARKZONE_GC_TONSIL_BCELL_DN;GSE12845_PRE_GC_VS_DARKZONE_…	3D-structure;Alternativesplicing;Chromatinregulator;Completeproteome;Diseasemutation;DNA-binding;Nucleus;Phosphoprotein;Polymorphism;Referenceproteome;Repressor;Transcription;Transcriptionregulation
-0.037239	-0.847793	-0.796722	-0.608135	-0.478475	-0.943699	0.00434398	NaN	-0.110047	-0.940017	-0.280665	NaN	-0.389043	-0.24746	-0.619378	0.794395	-0.147057	0.0611946	NaN	NaN	NaN	0.115724	-0.563678	0.469787	-0.567796	-1.77454	-1.22832	-0.648703	-1.30085	-0.0872064	NaN	-0.168322	-0.878949	0.288284	-0.334854	-0.567796	-0.232942	0.307564	S	2	___1	biological regulation;biosynthetic process;cellular biosynthetic process;cellular component organization;cellular component organization at cellular level;cellular component organization or biogenesis;cellular component organization or biogenesis at cellular level;cellular macromolecule biosynthetic process;cellular macromolecule metabolic process;cellular metabolic process;cellular nitrogen comp…	acid-amino acid ligase activity;binding;catalytic activity;chromatin binding;DNA binding;enzyme binding;ligase activity;ligase activity, forming carbon-nitrogen bonds;nucleic acid binding;protein binding;protein binding transcription factor activity;regulatory region DNA binding;regulatory region nucleic acid binding;RNA binding;single-stranded RNA binding;small conjugating protein binding;small …	cell part;intracellular membrane-bounded organelle;intracellular organelle;intracellular organelle part;intracellular part;macromolecular complex;membrane-bounded organelle;nuclear body;nuclear part;nuclear speck;nucleoplasm;nucleoplasm part;nucleus;organelle;organelle part;PcG protein complex;PRC1 complex;protein complex	biological regulation;biosynthetic process;cellular component organization;cellular metabolic process;cellular nitrogen compound metabolic process;cellular process;chromatin modification;chromatin organization;chromosome organization;macromolecule metabolic process;macromolecule modification;metabolic process;nitrogen compound metabolic process;nucleobase-containing compound metabolic process;org…	cell part;intracellular membrane-bounded organelle;intracellular organelle;macromolecular complex;nucleoplasm;nucleus;organelle;PcG protein complex;protein complex		Chromo	AATGGAG,MIR-136;AMIT_EGF_RESPONSE_40_HELA;ANTI_APOPTOSIS;APOPTOSIS_GO;ATAAGCT,MIR-21;ATACTGT,MIR-144;BENPORATH_ES_WITH_H3K27ME3;BLUM_RESPONSE_TO_SALIRASIB_UP;BROWNE_HCMV_INFECTION_20HR_UP;BROWNE_HCMV_INFECTION_8HR_UP;CAGTATT,MIR-200B,MIR-200C,MIR-429;CELL_DEVELOPMENT;CHANDRAN_METASTASIS_TOP50_UP;CHANDRAN_METASTASIS_UP;chr17q25;CTCTAGA,MIR-526C,MIR-518F,MIR-526A;DACOSTA_UV_RESPONSE_VIA_ERCC3_TTD_U…	3D-structure;Acetylation;Alternativesplicing;Chromatinregulator;Completeproteome;Isopeptidebond;Ligase;Nucleus;Phosphoprotein;Referenceproteome;Repressor;Transcription;Transcriptionregulation;Ublconjugation;Ublconjugationpathway
0.0631587	NaN	0.265603	-0.235523	-0.0293513	-0.438264	-0.728471	-0.545698	-0.000400877	-0.263556	-0.600855	-0.59326	-0.259519	-0.228597	-0.615491	-0.120899	0.49128	0.0996519	-0.356518	-0.19701	0.783684	NaN	-0.981149	0.95355	0.333872	-0.378076	NaN	-0.462093	NaN	-0.0535048	-0.756552	0.311555	0.0427032	0.416075	-0.235523	-0.125257	0.110266	0.339887	S	3	___1	axon guidance;chemotaxis;locomotion;response to chemical stimulus;response to external stimulus;response to stimulus;taxis	binding;cation binding;heme binding;ion binding;iron ion binding;lipid binding;metal ion binding;steroid binding;tetrapyrrole binding;transition metal ion binding	cell part;cytoplasmic part;endoplasmic reticulum;endoplasmic reticulum membrane;endoplasmic reticulum part;extracellular membrane-bounded organelle;extracellular organelle;extracellular region part;extracellular vesicular exosome;integral to membrane;intracellular membrane-bounded organelle;intracellular non-membrane-bounded organelle;intracellular organelle;intracellular organelle part;intracell…	locomotion;response to chemical stimulus;response to external stimulus;response to stimulus	cell part;endoplasmic reticulum;extracellular organelle;intracellular membrane-bounded organelle;intracellular non-membrane-bounded organelle;intracellular organelle;membrane;nucleolus;organelle;vesicle		Cyt-b5	AACTTT_UNKNOWN;BLALOCK_ALZHEIMERS_DISEASE_DN;BORCZUK_MALIGNANT_MESOTHELIOMA_UP;BROWN_MYELOID_CELL_DEVELOPMENT_DN;BRUINS_UVC_RESPONSE_VIA_TP53_GROUP_A;BUYTAERT_PHOTODYNAMIC_THERAPY_STRESS_DN;CAGGTA_V$AREB6_01;CELL_SURFACE;CHIARADONNA_NEOPLASTIC_TRANSFORMATION_CDC25_UP;chrxq22;CREIGHTON_ENDOCRINE_THERAPY_RESISTANCE_3;CROMER_METASTASIS_UP;DAIRKEE_TERT_TARGETS_UP;DAVICIONI_MOLECULAR_ARMS_VS_ERMS_DN;D…	Alternativesplicing;Completeproteome;Directproteinsequencing;Endoplasmicreticulum;Lipid-binding;Membrane;Microsome;Phosphoprotein;Receptor;Referenceproteome;Steroid-binding;Transmembrane;Transmembranehelix
0.666547	-0.573003	0.84447	-0.0504951	0.349716	-0.816982	0.662391	-0.226048	0.433321	0.0423597	-0.219855	0.0759525	0.507963	NaN	-0.48213	0.239653	0.224248	0.3542	-0.186876	0.013257	0.706717	-0.582987	-0.234781	0.122298	0.170459	0.0311772	-0.236439	-0.360388	NaN	0.148008	0.0767343	0.260204	-0.392912	0.294911	0.224248	0.0222171	-0.202031	0.338186	S	3	___1	biological regulation;biosynthetic process;cell cycle;cellular biosynthetic process;cellular component organization;cellular component organization at cellular level;cellular component organization or biogenesis;cellular component organization or biogenesis at cellular level;cellular macromolecule biosynthetic process;cellular macromolecule metabolic process;cellular metabolic process;cellular ni…	binding;chromatin binding;enzyme binding;protein binding;protein dimerization activity;protein heterodimerization activity	cell part;DSIF complex;intracellular membrane-bounded organelle;intracellular organelle;intracellular organelle part;intracellular part;macromolecular complex;membrane-bounded organelle;nuclear part;nucleoplasm;nucleoplasm part;nucleus;organelle;organelle part;protein complex;transcription elongation factor complex	biological regulation;biosynthetic process;cell cycle;cellular component organization;cellular metabolic process;cellular nitrogen compound metabolic process;cellular process;chromatin modification;chromatin organization;chromosome organization;macromolecule metabolic process;metabolic process;mRNA metabolic process;mRNA processing;nitrogen compound metabolic process;nucleobase-containing compoun…	cell part;intracellular membrane-bounded organelle;intracellular organelle;macromolecular complex;nucleoplasm;nucleus;organelle;protein complex;transcription elongation factor complex		KOW;Spt5_N;Spt5-NGN	BARRIER_CANCER_RELAPSE_NORMAL_SAMPLE_DN;BENPORATH_ES_CORE_NINE_CORRELATED;BENPORATH_MYC_MAX_TARGETS;BIOPOLYMER_METABOLIC_PROCESS;CAGCTG_V$AP4_Q5;chr19q13;CYCLIN_D1_KE_.V1_UP;CYCLIN_D1_UP.V1_UP;DANG_BOUND_BY_MYC;ENZYME_BINDING;GSE12845_IGD_POS_BLOOD_VS_DARKZONE_GC_TONSIL_BCELL_DN;GSE12845_IGD_POS_BLOOD_VS_NAIVE_TONSIL_BCELL_DN;GSE13485_CTRL_VS_DAY21_YF17D_VACCINE_PBMC_UP;GSE13485_DAY1_VS_DAY21_YF1…	3D-structure;Acetylation;Activator;Alternativesplicing;Completeproteome;Directproteinsequencing;Methylation;Nucleus;Phosphoprotein;Referenceproteome;Repeat;Repressor;Transcription;Transcriptionregulation
NaN	NaN	0.0303953	NaN	NaN	0.249281	0.407395	NaN	-0.848874	NaN	0.909158	0.464349	NaN	NaN	NaN	NaN	NaN	0.823711	0.838493	1.73016	NaN	0.0143407	1.5871	-0.308842	0.123918	NaN	1.40224	NaN	NaN	1.19041	-0.282098	1.19561	-0.201597	0.274752	0.407395	0.838493	0.431097	0.108472	S	3	___1	apoptosis;biological regulation;catabolic process;cell death;cellular catabolic process;cellular component disassembly;cellular component disassembly at cellular level;cellular component disassembly involved in apoptosis;cellular component organization;cellular component organization at cellular level;cellular component organization or biogenesis;cellular component organization or biogenesis at c…		cell part;chromatin;chromosomal part;cytoplasm;cytoplasmic part;cytosol;intracellular membrane-bounded organelle;intracellular organelle;intracellular organelle part;intracellular part;membrane-bounded organelle;nuclear chromatin;nuclear chromosome part;nuclear part;nucleoplasm;nucleus;organelle;organelle part	biological regulation;catabolic process;cell death;cellular component disassembly;cellular component organization;cellular metabolic process;cellular nitrogen compound metabolic process;cellular process;death;DNA metabolic process;macromolecule metabolic process;metabolic process;nitrogen compound metabolic process;nucleobase-containing compound metabolic process;primary metabolic process	cell part;cytoplasm;cytosol;intracellular membrane-bounded organelle;intracellular organelle;nucleoplasm;nucleus;organelle	Apoptosis	CIDE-N;DFF-C	ACTAYRNNNCCCR_UNKNOWN;APOPTOSIS_GO;APOPTOTIC_NUCLEAR_CHANGES;APOPTOTIC_PROGRAM;ASTON_MAJOR_DEPRESSIVE_DISORDER_DN;BIOCARTA_CASPASE_PATHWAY;BIOCARTA_DEATH_PATHWAY;BIOCARTA_DNAFRAGMENT_PATHWAY;BIOCARTA_FAS_PATHWAY;BIOCARTA_HIVNEF_PATHWAY;BIOCARTA_MITOCHONDRIA_PATHWAY;BIOCARTA_SET_PATHWAY;BIOCARTA_TNFR1_PATHWAY;BIOPOLYMER_CATABOLIC_PROCESS;BIOPOLYMER_METABOLIC_PROCESS;BROWNE_HCMV_INFECTION_1HR_DN;BR…	3D-structure;Acetylation;Alternativesplicing;Apoptosis;Completeproteome;Cytoplasm;Directproteinsequencing;Phosphoprotein;Referenceproteome
1.36499	-1.54612	1.2851	-1.7447	-1.18515	-1.15971	-0.595614	-0.651107	-0.549524	-1.38072	-1.61049	-0.869125	-0.428604	-0.989124	-1.42097	-0.917082	-0.0796045	-1.72874	-1.04206	-0.996584	-0.352367	-0.653361	-1.25496	-1.40196	-0.156327	-1.2794	NaN	-0.778337	NaN	-1.72887	2.35134	-0.806337	-1.94003	0.963177	-0.953103	-0.996584	-0.0434811	0.492463	S	2	___1	biological regulation;biosynthetic process;cellular biosynthetic process;cellular component assembly;cellular component assembly at cellular level;cellular component organization;cellular component organization at cellular level;cellular component organization or biogenesis;cellular component organization or biogenesis at cellular level;cellular macromolecular complex assembly;cellular macromolec…	binding;catalytic activity;cysteine-type peptidase activity;hydrolase activity;nucleic acid binding;peptidase activity;peptidase activity, acting on L-amino acid peptides;RNA binding;small conjugating protein-specific protease activity;translation factor activity, nucleic acid binding;translation initiation factor activity;ubiquitin-specific protease activity	cell part;cytoplasmic part;cytosol;eukaryotic 43S preinitiation complex;eukaryotic 48S preinitiation complex;eukaryotic translation initiation factor 3 complex;intracellular part;macromolecular complex;membrane;protein complex;ribonucleoprotein complex;translation preinitiation complex	biological regulation;biosynthetic process;cellular component assembly;cellular component organization;cellular macromolecular complex assembly;cellular metabolic process;cellular process;macromolecular complex assembly;macromolecule metabolic process;macromolecule modification;metabolic process;primary metabolic process;protein metabolic process;protein modification by small protein conjugation …	cell part;cytosol;macromolecular complex;membrane;protein complex;ribonucleoprotein complex	RNA transport	JAB;MitMem_reg	ACEVEDO_LIVER_TUMOR_VS_NORMAL_ADJACENT_TISSUE_UP;ALCALA_APOPTOSIS;APPIERTO_RESPONSE_TO_FENRETINIDE_DN;BENPORATH_NANOG_TARGETS;BENPORATH_SOX2_TARGETS;BILANGES_SERUM_AND_RAPAMYCIN_SENSITIVE_GENES;BILANGES_SERUM_RESPONSE_TRANSLATION;BIOSYNTHETIC_PROCESS;CAIRO_HEPATOBLASTOMA_CLASSES_UP;CELLULAR_BIOSYNTHETIC_PROCESS;CELLULAR_COMPONENT_ASSEMBLY;CELLULAR_MACROMOLECULE_METABOLIC_PROCESS;CELLULAR_PROTEIN_…	3D-structure;Acetylation;Completeproteome;Cytoplasm;Hydrolase;Initiationfactor;Phosphoprotein;Polymorphism;Protease;Proteinbiosynthesis;Referenceproteome;Thiolprotease;Ublconjugationpathway
-0.451524	-0.195862	NaN	NaN	NaN	0.292466	-0.014464	NaN	NaN	NaN	NaN	NaN	0.268851	NaN	NaN	NaN	NaN	0.236481	NaN	NaN	NaN	NaN	-0.0827114	-0.149611	-1.01406	NaN	NaN	NaN	NaN	0.177598	0.29388	0.35167	0.598625	0.992009	0.111008	0.177598	0.0665892	0.381754	S	2	___1	biological regulation;catabolic process;cellular catabolic process;cellular chemical homeostasis;cellular homeostasis;cellular ion homeostasis;cellular macromolecule catabolic process;cellular macromolecule metabolic process;cellular metabolic process;cellular process;cellular protein metabolic process;chemical homeostasis;entry into cell of other organism involved in symbiotic interaction;entry …	acid-amino acid ligase activity;binding;catalytic activity;ligase activity;ligase activity, forming carbon-nitrogen bonds;protein binding;RNA polymerase II transcription factor binding;small conjugating protein ligase activity;transcription factor binding;ubiquitin-protein ligase activity	cell part;cytoplasm;extracellular membrane-bounded organelle;extracellular organelle;extracellular region part;extracellular vesicular exosome;intracellular membrane-bounded organelle;intracellular organelle;intracellular part;macromolecular complex;membrane;membrane-bounded organelle;membrane-bounded vesicle;nucleus;organelle;protein complex;ubiquitin ligase complex;vesicle	biological regulation;catabolic process;cellular homeostasis;cellular ion homeostasis;cellular metabolic process;cellular process;homeostatic process;interspecies interaction between organisms;locomotion;macromolecule metabolic process;macromolecule modification;metabolic process;multi-organism process;primary metabolic process;protein metabolic process;protein modification by small protein conju…	cell part;cytoplasm;extracellular organelle;intracellular membrane-bounded organelle;intracellular organelle;macromolecular complex;membrane;nucleus;organelle;protein complex;ubiquitin ligase complex;vesicle	Ubiquitin mediated proteolysis	HECT;WW	AACTTT_UNKNOWN;ACID_AMINO_ACID_LIGASE_ACTIVITY;BIOPOLYMER_METABOLIC_PROCESS;BIOPOLYMER_MODIFICATION;BLALOCK_ALZHEIMERS_DISEASE_INCIPIENT_UP;BLALOCK_ALZHEIMERS_DISEASE_UP;BROWNE_HCMV_INFECTION_14HR_DN;BROWNE_HCMV_INFECTION_18HR_DN;CACGTG_V$MYC_Q2;CAGGTG_V$E12_Q6;CELLULAR_MACROMOLECULE_METABOLIC_PROCESS;CELLULAR_PROTEIN_METABOLIC_PROCESS;CGGAARNGGCNG_UNKNOWN;CHIARADONNA_NEOPLASTIC_TRANSFORMATION_CD…	Alternativesplicing;Completeproteome;Host-virusinteraction;Ligase;Nucleus;Phosphoprotein;Referenceproteome;Repeat;Ublconjugation;Ublconjugationpathway
NaN	NaN	-2.90759	NaN	NaN	-0.200176	NaN	-1.33267	NaN	-1.08284	NaN	NaN	-0.882361	NaN	-1.19892	NaN	NaN	-1.05761	NaN	NaN	NaN	NaN	-0.00421523	NaN	-0.266523	0.0445017	NaN	NaN	NaN	-0.742772	-0.114161	NaN	NaN	0.0168666	-1.08284	-0.114161	0.968681	0.00450194	S	3	___1	acetyl-CoA transport;biological regulation;BMP signaling pathway;cation transport;cell surface receptor linked signaling pathway;cellular process;cellular response to stimulus;coenzyme transport;cofactor transport;enzyme linked receptor protein signaling pathway;establishment of localization;hydrogen transport;ion transport;monovalent inorganic cation transport;proton transport;regulation of biol…	acetyl-CoA transporter activity;active transmembrane transporter activity;cation transmembrane transporter activity;coenzyme transporter activity;cofactor transporter activity;ion transmembrane transporter activity;secondary active transmembrane transporter activity;solute:cation symporter activity;solute:hydrogen symporter activity;substrate-specific transmembrane transporter activity;substrate-…	cell part;cytoplasmic part;endoplasmic reticulum membrane;endoplasmic reticulum part;Golgi apparatus part;Golgi membrane;integral to membrane;integral to plasma membrane;intracellular organelle part;intracellular part;intrinsic to membrane;intrinsic to plasma membrane;membrane;membrane part;organelle membrane;organelle part;plasma membrane part	biological regulation;cellular process;cofactor transport;establishment of localization;hydrogen transport;ion transport;response to stimulus;signal transduction;transmembrane transport;transport	cell part;membrane	Glycosphingolipid biosynthesis - ganglio series	Acatn	ACCAAAG,MIR-9;ACEVEDO_LIVER_CANCER_UP;ACEVEDO_LIVER_TUMOR_VS_NORMAL_ADJACENT_TISSUE_UP;BLALOCK_ALZHEIMERS_DISEASE_UP;BLUM_RESPONSE_TO_SALIRASIB_UP;BUYTAERT_PHOTODYNAMIC_THERAPY_STRESS_UP;CACGTG_V$MYC_Q2;CELL_FRACTION;chr3q;COFACTOR_TRANSPORTER_ACTIVITY;CUI_GLUCOSE_DEPRIVATION;CUI_TCF21_TARGETS_2_DN;CYTOPLASM;CYTOPLASMIC_PART;DOUGLAS_BMI1_TARGETS_DN;ENDOMEMBRANE_SYSTEM;ENDOPLASMIC_RETICULUM;ENDOPL…	Cataract;Completeproteome;Deafness;Diseasemutation;Endoplasmicreticulum;Glycoprotein;Hereditaryspasticparaplegia;Membrane;Neurodegeneration;Phosphoprotein;Polymorphism;Referenceproteome;Transmembrane;Transmembranehelix;Transport
NaN	NaN	3.25477	0.113384	-0.312969	0.528971	-0.418268	-0.0086719	-0.176881	-0.820743	NaN	NaN	-0.388279	NaN	0.728351	NaN	-1.46034	-0.58242	NaN	NaN	-1.03759	NaN	1.15032	-0.0379233	0.586382	NaN	NaN	NaN	-1.2136	NaN	-0.181468	NaN	-0.480681	0.654544	-0.244925	-0.181468	0.0634572	0.384817	S	2	___1	biological regulation;biosynthetic process;cell surface receptor linked signaling pathway;cellular biosynthetic process;cellular macromolecule biosynthetic process;cellular macromolecule metabolic process;cellular metabolic process;cellular process;cellular protein metabolic process;cellular response to chemical stimulus;cellular response to endogenous stimulus;cellular response to hormone stimul…	adenyl nucleotide binding;adenyl ribonucleotide binding;ATP binding;binding;calcium ion binding;calmodulin binding;calmodulin-dependent protein kinase activity;catalytic activity;cation binding;elongation factor-2 kinase activity;ion binding;kinase activity;metal ion binding;nucleic acid binding;nucleotide binding;phosphotransferase activity, alcohol group as acceptor;protein binding;protein kina…	cell part;cytoplasm;cytoplasmic part;cytosol;intracellular part	biological regulation;biosynthetic process;cellular metabolic process;cellular process;macromolecule metabolic process;macromolecule modification;metabolic process;phosphorus metabolic process;primary metabolic process;protein metabolic process;protein modification process;protein phosphorylation;regulation of protein modification process;response to chemical stimulus;response to endogenous stimu…	cell part;cytoplasm;cytosol		Alpha_kinase;Sel1	ACEVEDO_NORMAL_TISSUE_ADJACENT_TO_LIVER_TUMOR_DN;BASAKI_YBX1_TARGETS_DN;BIOCARTA_EIF_PATHWAY;BIOPOLYMER_BIOSYNTHETIC_PROCESS;BIOPOLYMER_METABOLIC_PROCESS;BIOSYNTHETIC_PROCESS;CELLULAR_BIOSYNTHETIC_PROCESS;CELLULAR_MACROMOLECULE_METABOLIC_PROCESS;CELLULAR_PROTEIN_METABOLIC_PROCESS;chr16p12;CYTOPLASM;DAIRKEE_TERT_TARGETS_UP;FEVR_CTNNB1_TARGETS_UP;FULCHER_INFLAMMATORY_RESPONSE_LECTIN_VS_LPS_UP;GARGA…	Acetylation;ATP-binding;Calcium;Calmodulin-binding;Completeproteome;Kinase;Nucleotide-binding;Phosphoprotein;Polymorphism;Referenceproteome;Serine/threonine-proteinkinase;Transferase
-1.48225	-0.408183	-0.778454	NaN	NaN	-1.15687	NaN	-1.36862	-0.897218	-1.27817	NaN	NaN	NaN	NaN	-1.35998	NaN	NaN	-0.267463	1.22491	0.178742	-0.69685	NaN	0.0570622	NaN	NaN	-0.430174	NaN	0.612636	NaN	NaN	NaN	-1.94129	0.635827	0.0307983	-1.15687	0.117902	1.27477	0.000341823	S	2	___1	anatomical structure morphogenesis;apoptosis;apoptotic mitochondrial changes;biological regulation;cell death;cell part morphogenesis;cellular component assembly;cellular component assembly at cellular level;cellular component disassembly;cellular component disassembly at cellular level;cellular component disassembly involved in apoptosis;cellular component morphogenesis;cellular component organi…	binding;catalytic activity;enzyme binding;GTP binding;GTPase activity;guanyl nucleotide binding;guanyl ribonucleotide binding;hydrolase activity;hydrolase activity, acting on acid anhydrides;hydrolase activity, acting on acid anhydrides, in phosphorus-containing anhydrides;identical protein binding;lipid binding;nucleoside-triphosphatase activity;nucleotide binding;protein binding;protein dimeriz…	cell junction;cell part;clathrin coated vesicle membrane;coated pit;coated vesicle membrane;cytoplasm;cytoplasmic part;cytoplasmic vesicle membrane;cytoplasmic vesicle part;cytoskeletal part;cytosol;Golgi apparatus;intracellular membrane-bounded organelle;intracellular organelle;intracellular organelle part;intracellular part;macromolecular complex;membrane;membrane part;membrane-bounded organell…	anatomical structure morphogenesis;biological regulation;cell death;cellular component assembly;cellular component disassembly;cellular component morphogenesis;cellular component organization;cellular localization;cellular macromolecular complex assembly;cellular membrane organization;cellular process;death;developmental process;endocytosis;establishment of localization;localization;macromolecula…	cell part;cytoplasm;cytosol;Golgi apparatus;intracellular membrane-bounded organelle;intracellular organelle;macromolecular complex;membrane;microbody;mitochondrion;organelle;peroxisome;protein complex	Bacterial invasion of epithelial cells;Endocrine and other factor-regulated calcium reabsorption;Endocytosis;Fc gamma R-mediated phagocytosis	Dynamin_M;GED	ACTAYRNNNCCCR_UNKNOWN;APOPTOSIS_GO;APOPTOTIC_MITOCHONDRIAL_CHANGES;APOPTOTIC_PROGRAM;BAELDE_DIABETIC_NEPHROPATHY_DN;BLALOCK_ALZHEIMERS_DISEASE_DN;BOYLAN_MULTIPLE_MYELOMA_PCA3_DN;BRUINS_UVC_RESPONSE_VIA_TP53_GROUP_D;CASORELLI_ACUTE_PROMYELOCYTIC_LEUKEMIA_DN;CELL_DEVELOPMENT;chr12p;CYCLIN_D1_KE_.V1_DN;CYTOPLASM;CYTOPLASMIC_PART;DIAZ_CHRONIC_MEYLOGENOUS_LEUKEMIA_UP;DODD_NASOPHARYNGEAL_CARCINOMA_DN;E…	3D-structure;Acetylation;Alternativesplicing;Celljunction;Coatedpit;Completeproteome;Cytoplasm;Cytoplasmicvesicle;Diseasemutation;Endocytosis;Glycoprotein;Golgiapparatus;GTP-binding;Hydrolase;Isopeptidebond;Lipid-binding;Membrane;Mitochondrion;Mitochondrionoutermembrane;Necrosis;Nucleotide-binding;Peroxisome;Phosphoprotein;Polymorphism;Referenceproteome;S-nitrosylation;Synapse;Ublconjugation
-0.975216	-3.77585	-2.18821	-0.681597	-1.34761	-2.97064	NaN	NaN	NaN	-1.34956	-2.48304	NaN	NaN	NaN	NaN	-1.14091	NaN	NaN	-2.91151	-2.08022	NaN	NaN	-2.99848	NaN	NaN	-2.68372	-0.625715	-2.7011	NaN	-3.39792	NaN	NaN	-0.831254	0.438071	-1.34956	-2.69241	-1.34285	0.000180275	S	2	___1	adaptive immune response;biological regulation;biosynthetic process;cell activation;cell chemotaxis;cell migration;cell motility;cell surface receptor linked signaling pathway;cellular biosynthetic process;cellular component assembly;cellular component assembly at cellular level;cellular component movement;cellular component organization;cellular component organization at cellular level;cellular …	1-phosphatidylinositol-3-kinase activity;adenyl nucleotide binding;adenyl ribonucleotide binding;ATP binding;binding;catalytic activity;inositol or phosphatidylinositol kinase activity;kinase activity;lipid binding;lipid kinase activity;nucleotide binding;phosphatidylinositol 3-kinase activity;phosphatidylinositol binding;phosphatidylinositol kinase activity;phosphatidylinositol phosphate kinase …	cell part;clathrin-coated vesicle;coated vesicle;cytoplasm;cytoplasmic membrane-bounded vesicle;cytoplasmic part;cytoplasmic vesicle;cytosol;cytosolic part;extracellular membrane-bounded organelle;extracellular organelle;extracellular region part;extracellular vesicular exosome;Golgi apparatus;intracellular membrane-bounded organelle;intracellular organelle;intracellular part;macromolecular compl…	biological regulation;biosynthetic process;cell activation;cell motility;cellular component assembly;cellular component movement;cellular component organization;cellular lipid metabolic process;cellular macromolecular complex assembly;cellular membrane organization;cellular metabolic process;cellular process;circulatory system process;endocytosis;establishment of localization;exocytosis;immune sy…	cell part;cytoplasm;cytoplasmic membrane-bounded vesicle;cytosol;extracellular organelle;Golgi apparatus;intracellular membrane-bounded organelle;intracellular organelle;macromolecular complex;membrane;nucleus;organelle;phosphatidylinositol 3-kinase complex;plasma membrane;protein complex;vesicle	Inositol phosphate metabolism;Phosphatidylinositol signaling system	C2;PI3_PI4_kinase;PI3K_C2;PI3K_rbd;PI3Ka;PX	AAAYWAACM_V$HFH4_01;BILD_CTNNB1_ONCOGENIC_SIGNATURE;BIOSYNTHETIC_PROCESS;CELLULAR_LIPID_METABOLIC_PROCESS;chr11p15;DACOSTA_UV_RESPONSE_VIA_ERCC3_DN;DACOSTA_UV_RESPONSE_VIA_ERCC3_TTD_DN;DACOSTA_UV_RESPONSE_VIA_ERCC3_XPCS_DN;DODD_NASOPHARYNGEAL_CARCINOMA_DN;FEVR_CTNNB1_TARGETS_UP;FLECHNER_BIOPSY_KIDNEY_TRANSPLANT_OK_VS_DONOR_UP;FLECHNER_BIOPSY_KIDNEY_TRANSPLANT_REJECTED_VS_OK_DN;GABRIELY_MIR21_TARG…	3D-structure;Acetylation;Alternativesplicing;ATP-binding;Cellmembrane;Completeproteome;Cytoplasm;Cytoplasmicvesicle;Endocytosis;Exocytosis;Golgiapparatus;Kinase;Membrane;Nucleotide-binding;Nucleus;Phosphoprotein;Polymorphism;Referenceproteome;Transferase
1.32331	-0.780799	-1.146	-0.208415	1.15813	0.506562	NaN	NaN	0.328394	NaN	0.107312	NaN	NaN	1.75205	NaN	1.61946	NaN	2.09481	NaN	NaN	NaN	2.13386	0.340923	2.25822	1.03374	NaN	NaN	0.25665	NaN	NaN	-0.44509	NaN	NaN	0.577231	0.506562	0.687334	0.180772	0.276458	S	2	___1	anatomical structure development;anatomical structure formation involved in morphogenesis;anatomical structure morphogenesis;angiogenesis;biological regulation;cell development;cellular developmental process;cellular process;definitive hemopoiesis;developmental process;hemopoiesis;hemopoietic or lymphoid organ development;lens morphogenesis in camera-type eye;megakaryocyte development;negative re…	binding;chromatin binding;core promoter proximal region DNA binding;core promoter proximal region sequence-specific DNA binding;DNA binding;nucleic acid binding;nucleic acid binding transcription factor activity;regulatory region DNA binding;regulatory region nucleic acid binding;RNA polymerase II core promoter proximal region sequence-specific DNA binding;RNA polymerase II core promoter proximal…	cell part;intracellular membrane-bounded organelle;intracellular organelle;intracellular organelle part;intracellular part;macromolecular complex;membrane-bounded organelle;nuclear part;nucleoplasm part;nucleus;organelle;organelle part;protein complex;transcription factor complex	anatomical structure development;anatomical structure formation involved in morphogenesis;anatomical structure morphogenesis;biological regulation;cell development;cellular process;developmental process	cell part;intracellular membrane-bounded organelle;intracellular organelle;macromolecular complex;nucleus;organelle;protein complex;transcription factor complex		Homeobox_KN	AAANWWTGC_UNKNOWN;AAAYRNCTG_UNKNOWN;AACTTT_UNKNOWN;AATGTGA,MIR-23A,MIR-23B;ACATTCC,MIR-1,MIR-206;ACCAATC,MIR-509;ACTGCAG,MIR-17-3P;AGCATTA,MIR-155;ALCALAY_AML_BY_NPM1_LOCALIZATION_UP;ATACTGT,MIR-144;ATGTAGC,MIR-221,MIR-222;BASAKI_YBX1_TARGETS_DN;BENPORATH_ES_WITH_H3K27ME3;BERENJENO_TRANSFORMED_BY_RHOA_DN;BOQUEST_STEM_CELL_UP;BROWNE_HCMV_INFECTION_6HR_DN;CASORELLI_ACUTE_PROMYELOCYTIC_LEUKEMIA_DN;C…	Activator;Alternativesplicing;Completeproteome;Developmentalprotein;DNA-binding;Homeobox;Nucleus;Polymorphism;Referenceproteome;Transcription
0.253049	-0.626689	-0.440205	-0.005114	-0.581709	-0.724436	-0.13283	-0.901457	-0.0894469	-0.246443	-0.711558	-0.678423	-0.517323	-0.387434	-1.02248	-0.0890226	-0.865995	-0.738681	-0.62895	-0.750289	-0.268662	0.155857	-0.902034	-0.846573	0.194508	-0.268205	-0.900627	-0.61266	0.106035	-0.870565	0.509562	0.25318	-0.18424	0.368577	-0.549516	-0.268662	0.280854	0.19772	S	2	___1	biological regulation;regulation of biological process;regulation of cell growth;regulation of cellular component organization;regulation of cellular process;regulation of growth	apoptotic protease activator activity;enzyme activator activity;enzyme regulator activity;peptidase activator activity;peptidase regulator activity	adherens junction;anchoring junction;cell junction;cell part;cell-substrate adherens junction;cell-substrate junction;cytoplasmic membrane-bounded vesicle;cytoplasmic part;cytoplasmic vesicle;focal adhesion;Golgi apparatus;Golgi apparatus part;Golgi membrane;integral to membrane;intracellular membrane-bounded organelle;intracellular organelle;intracellular organelle part;intracellular part;intrin…	biological regulation	cell part;cytoplasmic membrane-bounded vesicle;Golgi apparatus;intracellular membrane-bounded organelle;intracellular organelle;membrane;organelle;plasma membrane;vesicle			BECKER_TAMOXIFEN_RESISTANCE_UP;BOCHKIS_FOXA2_TARGETS;BRUINS_UVC_RESPONSE_EARLY_LATE;BUYTAERT_PHOTODYNAMIC_THERAPY_STRESS_DN;CHOW_RASSF1_TARGETS_DN;chr8q23;CLIMENT_BREAST_CANCER_COPY_NUMBER_UP;CTTTGA_V$LEF1_Q2;CUI_TCF21_TARGETS_2_DN;DIAZ_CHRONIC_MEYLOGENOUS_LEUKEMIA_UP;ENK_UV_RESPONSE_KERATINOCYTE_DN;GGCNKCCATNK_UNKNOWN;GGGAGGRR_V$MAZ_Q6;GGGCGGR_V$SP1_Q6;GSE11864_UNTREATED_VS_CSF1_IN_MAC_DN;GSE137…	Alternativesplicing;Apoptosis;Coiledcoil;Completeproteome;Golgiapparatus;Membrane;Phosphoprotein;Referenceproteome;Signal-anchor;Transmembrane;Transmembranehelix
2.8354	2.52852	2.44443	NaN	1.41122	1.03334	1.97117	2.89775	2.92517	1.9136	2.07818	1.73905	NaN	NaN	2.2736	3.89936	1.7683	1.5192	2.94376	1.62939	2.22933	3.41557	-7.68177	1.52933	1.29215	0.834241	0.577275	2.73218	2.1282	2.59919	1.63194	3.36227	1.87714	0.271437	2.07818	1.87714	-0.201041	0.339186	S	2	___1	cellular macromolecule metabolic process;cellular metabolic process;cellular nitrogen compound metabolic process;cellular process;macromolecule metabolic process;macromolecule modification;metabolic process;ncRNA metabolic process;ncRNA processing;nitrogen compound metabolic process;nucleic acid metabolic process;nucleobase-containing compound metabolic process;primary metabolic process;RNA metab…	binding;nucleic acid binding;RNA binding;snoRNA binding	box C/D snoRNP complex;cell part;cytoplasm;intracellular non-membrane-bounded organelle;intracellular organelle;intracellular organelle part;intracellular part;macromolecular complex;membrane;non-membrane-bounded organelle;nuclear part;nucleolar part;nucleolus;nucleoplasm;organelle;organelle part;preribosome;pre-snoRNP complex;ribonucleoprotein complex;small nucleolar ribonucleoprotein complex;sm…	cellular metabolic process;cellular nitrogen compound metabolic process;cellular process;macromolecule metabolic process;macromolecule modification;metabolic process;nitrogen compound metabolic process;nucleobase-containing compound metabolic process;primary metabolic process;RNA metabolic process;RNA modification;RNA processing;rRNA processing	cell part;cytoplasm;intracellular non-membrane-bounded organelle;intracellular organelle;macromolecular complex;membrane;nucleolus;nucleoplasm;organelle;preribosome;ribonucleoprotein complex;small nucleolar ribonucleoprotein complex	Ribosome biogenesis in eukaryotes	Nop;NOP5NT;NOSIC	ABRAMSON_INTERACT_WITH_AIRE;ALFANO_MYC_TARGETS;BENPORATH_ES_1;BILD_MYC_ONCOGENIC_SIGNATURE;BIOPOLYMER_METABOLIC_PROCESS;BLALOCK_ALZHEIMERS_DISEASE_UP;BROWN_MYELOID_CELL_DEVELOPMENT_DN;BURTON_ADIPOGENESIS_2;BURTON_ADIPOGENESIS_PEAK_AT_8HR;CACGTG_V$MYC_Q2;CAIRO_HEPATOBLASTOMA_CLASSES_UP;chr20p13;DODD_NASOPHARYNGEAL_CARCINOMA_DN;DUTERTRE_ESTRADIOL_RESPONSE_6HR_UP;E2F1_UP.V1_UP;FEVR_CTNNB1_TARGETS_DN…	Acetylation;Completeproteome;Cytoplasm;Directproteinsequencing;Neurodegeneration;Nucleus;Phosphoprotein;Polymorphism;Referenceproteome;Ribonucleoprotein;Ribosomebiogenesis;Spinocerebellarataxia
NaN	0.0898401	-1.03167	NaN	NaN	-1.30277	NaN	NaN	-1.95321	NaN	-1.09973	-1.85241	-0.907677	NaN	-0.0758856	NaN	NaN	NaN	-0.943411	-1.85948	NaN	NaN	NaN	-1.95859	NaN	NaN	-2.06723	-1.94522	NaN	-2.0706	-1.41687	NaN	-0.703319	0.0836855	-1.0657	-1.90235	-0.836654	0.0150143	S	2	___1	biological regulation;biosynthetic process;cellular biosynthetic process;cellular component assembly;cellular component assembly at cellular level;cellular component organization;cellular component organization at cellular level;cellular component organization or biogenesis;cellular component organization or biogenesis at cellular level;cellular macromolecular complex assembly;cellular macromolec…	adenyl nucleotide binding;adenyl ribonucleotide binding;ATP binding;ATPase activity;ATPase activity, coupled;ATP-dependent DNA helicase activity;ATP-dependent helicase activity;ATP-dependent RNA helicase activity;binding;catalytic activity;CTPase activity;DNA binding;DNA helicase activity;DNA-dependent ATPase activity;eukaryotic initiation factor 4E binding;GTPase activity;helicase activity;hydro…	cell part;cytoplasm;cytoplasmic part;extracellular membrane-bounded organelle;extracellular organelle;extracellular region part;extracellular vesicular exosome;intracellular membrane-bounded organelle;intracellular non-membrane-bounded organelle;intracellular organelle;intracellular organelle part;intracellular part;macromolecular complex;membrane;membrane-bounded organelle;membrane-bounded vesic…	biological regulation;biosynthetic process;cellular component assembly;cellular component organization;cellular macromolecular complex assembly;cellular metabolic process;cellular nitrogen compound metabolic process;cellular process;chromosome segregation;DNA geometric change;DNA metabolic process;immune system process;macromolecular complex assembly;macromolecule metabolic process;metabolic proc…	cell part;cytoplasm;extracellular organelle;intracellular membrane-bounded organelle;intracellular non-membrane-bounded organelle;intracellular organelle;macromolecular complex;membrane;nucleolus;nucleus;organelle;ribonucleoprotein complex;vesicle	RIG-I-like receptor signaling pathway	DEAD;Helicase_C	AAACCAC,MIR-140;AAAGACA,MIR-511;AACTTT_UNKNOWN;AAGCAAT,MIR-137;AAGCACT,MIR-520F;AAGCCAT,MIR-135A,MIR-135B;ACAACTT,MIR-382;ACACTGG,MIR-199A,MIR-199B;ACTGAAA,MIR-30A-3P,MIR-30E-3P;ACTGTAG,MIR-139;AGGTGCA,MIR-500;AGTCTAG,MIR-151;AMUNDSON_GENOTOXIC_SIGNATURE;APRELIKOVA_BRCA1_TARGETS;ATAGGAA,MIR-202;ATGTACA,MIR-493;ATGTCAC,MIR-489;ATGTTAA,MIR-302C;ATP_DEPENDENT_HELICASE_ACTIVITY;ATP_DEPENDENT_RNA_HELI…	3D-structure;Acetylation;Alternativesplicing;Apoptosis;ATP-binding;Chromosomepartition;Completeproteome;Cytoplasm;Directproteinsequencing;DNA-binding;Helicase;Host-virusinteraction;Hydrolase;Immunity;Innateimmunity;Membrane;Mitochondrion;Mitochondrionoutermembrane;Nucleotide-binding;Nucleus;Phosphoprotein;Polymorphism;Referenceproteome;Ribosomebiogenesis;RNA-binding;Transcription;Transcriptionreg…
-2.04001	NaN	0.00986335	-0.0131277	-0.951131	-0.889773	-0.956733	-1.18168	-1.7216	NaN	-1.2049	NaN	-0.0582062	NaN	NaN	NaN	NaN	-2.49592	-0.0834795	-0.90061	-0.392026	NaN	0.318768	NaN	NaN	NaN	-2.00351	NaN	NaN	NaN	NaN	-0.876286	0.118342	0.221217	-0.956733	-0.392026	0.564707	0.0573997	S	2	___1	biological regulation;biosynthetic process;cellular biosynthetic process;cellular component assembly;cellular component assembly at cellular level;cellular component organization;cellular component organization at cellular level;cellular component organization or biogenesis;cellular component organization or biogenesis at cellular level;cellular macromolecular complex assembly;cellular macromolec…	adenyl nucleotide binding;adenyl ribonucleotide binding;ATP binding;ATPase activity;ATPase activity, coupled;ATP-dependent DNA helicase activity;ATP-dependent helicase activity;ATP-dependent RNA helicase activity;binding;catalytic activity;CTPase activity;DNA binding;DNA helicase activity;DNA-dependent ATPase activity;eukaryotic initiation factor 4E binding;GTPase activity;helicase activity;hydro…	cell part;cytoplasm;cytoplasmic part;extracellular membrane-bounded organelle;extracellular organelle;extracellular region part;extracellular vesicular exosome;intracellular membrane-bounded organelle;intracellular non-membrane-bounded organelle;intracellular organelle;intracellular organelle part;intracellular part;macromolecular complex;membrane;membrane-bounded organelle;membrane-bounded vesic…	biological regulation;biosynthetic process;cellular component assembly;cellular component organization;cellular macromolecular complex assembly;cellular metabolic process;cellular nitrogen compound metabolic process;cellular process;chromosome segregation;DNA geometric change;DNA metabolic process;immune system process;macromolecular complex assembly;macromolecule metabolic process;metabolic proc…	cell part;cytoplasm;extracellular organelle;intracellular membrane-bounded organelle;intracellular non-membrane-bounded organelle;intracellular organelle;macromolecular complex;membrane;nucleolus;nucleus;organelle;ribonucleoprotein complex;vesicle	RIG-I-like receptor signaling pathway	DEAD;Helicase_C	AAACCAC,MIR-140;AAAGACA,MIR-511;AACTTT_UNKNOWN;AAGCAAT,MIR-137;AAGCACT,MIR-520F;AAGCCAT,MIR-135A,MIR-135B;ACAACTT,MIR-382;ACACTGG,MIR-199A,MIR-199B;ACTGAAA,MIR-30A-3P,MIR-30E-3P;ACTGTAG,MIR-139;AGGTGCA,MIR-500;AGTCTAG,MIR-151;APRELIKOVA_BRCA1_TARGETS;ATAGGAA,MIR-202;ATGTACA,MIR-493;ATGTCAC,MIR-489;ATGTTAA,MIR-302C;ATP_DEPENDENT_HELICASE_ACTIVITY;ATP_DEPENDENT_RNA_HELICASE_ACTIVITY;ATPASE_ACTIVITY…	3D-structure;Acetylation;Alternativesplicing;Apoptosis;ATP-binding;Chromosomepartition;Completeproteome;Cytoplasm;Directproteinsequencing;DNA-binding;Helicase;Host-virusinteraction;Hydrolase;Immunity;Innateimmunity;Membrane;Mitochondrion;Mitochondrionoutermembrane;Nucleotide-binding;Nucleus;Phosphoprotein;Polymorphism;Referenceproteome;Ribosomebiogenesis;RNA-binding;Transcription;Transcriptionreg…
1.49361	1.16113	0.626977	0.209405	-0.194791	0.074354	1.44896	0.645415	1.24144	0.991828	0.968235	1.13774	1.39911	1.0465	0.79866	1.20672	1.61915	1.10794	0.431092	0.374145	1.7935	2.00646	0.822268	0.303964	1.25657	0.809899	0.93458	0.424642	1.35624	0.863274	-0.599283	1.78662	-0.0814408	0.620418	1.07722	0.822268	-0.254951	0.286534	S	2	___1	anatomical structure development;anatomical structure formation involved in morphogenesis;androgen receptor signaling pathway;ATP-dependent chromatin remodeling;biological regulation;biosynthetic process;blood vessel development;cardiac chamber development;cellular biosynthetic process;cellular component disassembly;cellular component disassembly at cellular level;cellular component organization;…	binding;DNA binding;ligand-dependent nuclear receptor binding;nucleic acid binding;protein binding;protein binding transcription factor activity;receptor binding;transcription coactivator activity;transcription cofactor activity;transcription factor binding transcription factor activity	cell part;chromatin;chromatin remodeling complex;chromosomal part;intracellular membrane-bounded organelle;intracellular organelle;intracellular organelle part;intracellular part;macromolecular complex;membrane-bounded organelle;nBAF complex;npBAF complex;nuclear chromatin;nuclear chromosome part;nuclear part;nucleoplasm;nucleus;organelle;organelle part;protein complex;SWI/SNF complex;SWI/SNF-typ…	anatomical structure development;anatomical structure formation involved in morphogenesis;biological regulation;biosynthetic process;cellular component disassembly;cellular component organization;cellular metabolic process;cellular nitrogen compound metabolic process;cellular process;chromatin modification;chromatin organization;chromosome organization;developmental process;macromolecule metaboli…	cell part;chromatin remodeling complex;intracellular membrane-bounded organelle;intracellular organelle;macromolecular complex;nucleoplasm;nucleus;organelle;protein complex		ARID;DUF3518	AAAYRNCTG_UNKNOWN;AACTTT_UNKNOWN;ACACTGG,MIR-199A,MIR-199B;ACCAAAG,MIR-9;AGCTCCT,MIR-28;AGGGCAG,MIR-18A;ANDROGEN_RECEPTOR_SIGNALING_PATHWAY;ATAAGCT,MIR-21;ATACTGT,MIR-144;ATGTACA,MIR-493;ATGTAGC,MIR-221,MIR-222;BENPORATH_EED_TARGETS;BIOPOLYMER_METABOLIC_PROCESS;BLALOCK_ALZHEIMERS_DISEASE_INCIPIENT_UP;BLALOCK_ALZHEIMERS_DISEASE_UP;BRUINS_UVC_RESPONSE_EARLY_LATE;BURTON_ADIPOGENESIS_12;BYSTRYKH_HEMA…	3D-structure;Acetylation;Alternativesplicing;Chromatinregulator;Completeproteome;Directproteinsequencing;DNA-binding;Mentalretardation;Neurogenesis;Nucleus;Phosphoprotein;Polymorphism;Referenceproteome;Transcription;Transcriptionregulation
-0.0370389	0.0954378	0.185617	0.117756	0.698812	-0.112003	-0.0441239	-0.35187	-0.0655201	0.496768	0.227748	0.138591	0.321121	0.41858	-0.500135	-0.23401	-0.18218	0.223866	0.222931	-0.320043	-0.101907	0.480995	-0.267167	0.0787199	-0.013524	0.165075	0.198401	-0.491867	-0.0547498	0.709782	-0.282098	0.310348	-0.306759	0.62172	0.106597	-0.013524	-0.120121	0.424164	S	2	___1	anatomical structure development;anatomical structure formation involved in morphogenesis;androgen receptor signaling pathway;ATP-dependent chromatin remodeling;biological regulation;biosynthetic process;blood vessel development;cardiac chamber development;cellular biosynthetic process;cellular component disassembly;cellular component disassembly at cellular level;cellular component organization;…	binding;DNA binding;ligand-dependent nuclear receptor binding;nucleic acid binding;protein binding;protein binding transcription factor activity;receptor binding;transcription coactivator activity;transcription cofactor activity;transcription factor binding transcription factor activity	cell part;chromatin;chromatin remodeling complex;chromosomal part;intracellular membrane-bounded organelle;intracellular organelle;intracellular organelle part;intracellular part;macromolecular complex;membrane-bounded organelle;nBAF complex;npBAF complex;nuclear chromatin;nuclear chromosome part;nuclear part;nucleoplasm;nucleus;organelle;organelle part;protein complex;SWI/SNF complex;SWI/SNF-typ…	anatomical structure development;anatomical structure formation involved in morphogenesis;biological regulation;biosynthetic process;cellular component disassembly;cellular component organization;cellular metabolic process;cellular nitrogen compound metabolic process;cellular process;chromatin modification;chromatin organization;chromosome organization;developmental process;macromolecule metaboli…	cell part;chromatin remodeling complex;intracellular membrane-bounded organelle;intracellular organelle;macromolecular complex;nucleoplasm;nucleus;organelle;protein complex		ARID;DUF3518	AAAYRNCTG_UNKNOWN;AACTTT_UNKNOWN;ACACTGG,MIR-199A,MIR-199B;ACCAAAG,MIR-9;AGCTCCT,MIR-28;AGGGCAG,MIR-18A;ANDROGEN_RECEPTOR_SIGNALING_PATHWAY;ATAAGCT,MIR-21;ATACTGT,MIR-144;ATGTACA,MIR-493;ATGTAGC,MIR-221,MIR-222;BENPORATH_EED_TARGETS;BIOPOLYMER_METABOLIC_PROCESS;BLALOCK_ALZHEIMERS_DISEASE_INCIPIENT_UP;BLALOCK_ALZHEIMERS_DISEASE_UP;BRUINS_UVC_RESPONSE_EARLY_LATE;BURTON_ADIPOGENESIS_12;BYSTRYKH_HEMA…	3D-structure;Acetylation;Alternativesplicing;Chromatinregulator;Completeproteome;Directproteinsequencing;DNA-binding;Mentalretardation;Neurogenesis;Nucleus;Phosphoprotein;Polymorphism;Referenceproteome;Transcription;Transcriptionregulation
-0.202439	NaN	-0.194351	NaN	0.426029	-0.173757	-0.114671	0.396111	0.0542454	0.198544	0.729816	0.266413	0.509438	NaN	0.752348	0.518264	0.36823	0.577009	0.206282	0.643865	NaN	NaN	-0.237641	0.443034	-0.0771613	0.352711	0.622777	NaN	NaN	0.116088	0.42299	0.916113	-0.081426	0.837737	0.36823	0.352711	-0.0155185	0.463933	S	3	___1	anatomical structure development;anatomical structure formation involved in morphogenesis;androgen receptor signaling pathway;ATP-dependent chromatin remodeling;biological regulation;biosynthetic process;blood vessel development;cardiac chamber development;cellular biosynthetic process;cellular component disassembly;cellular component disassembly at cellular level;cellular component organization;…	binding;DNA binding;ligand-dependent nuclear receptor binding;nucleic acid binding;protein binding;protein binding transcription factor activity;receptor binding;transcription coactivator activity;transcription cofactor activity;transcription factor binding transcription factor activity	cell part;chromatin;chromatin remodeling complex;chromosomal part;intracellular membrane-bounded organelle;intracellular organelle;intracellular organelle part;intracellular part;macromolecular complex;membrane-bounded organelle;nBAF complex;npBAF complex;nuclear chromatin;nuclear chromosome part;nuclear part;nucleoplasm;nucleus;organelle;organelle part;protein complex;SWI/SNF complex;SWI/SNF-typ…	anatomical structure development;anatomical structure formation involved in morphogenesis;biological regulation;biosynthetic process;cellular component disassembly;cellular component organization;cellular metabolic process;cellular nitrogen compound metabolic process;cellular process;chromatin modification;chromatin organization;chromosome organization;developmental process;macromolecule metaboli…	cell part;chromatin remodeling complex;intracellular membrane-bounded organelle;intracellular organelle;macromolecular complex;nucleoplasm;nucleus;organelle;protein complex		ARID;DUF3518	AAAYRNCTG_UNKNOWN;AACTTT_UNKNOWN;ACACTGG,MIR-199A,MIR-199B;ACCAAAG,MIR-9;AGCTCCT,MIR-28;AGGGCAG,MIR-18A;ANDROGEN_RECEPTOR_SIGNALING_PATHWAY;ATAAGCT,MIR-21;ATACTGT,MIR-144;ATGTACA,MIR-493;ATGTAGC,MIR-221,MIR-222;BENPORATH_EED_TARGETS;BIOPOLYMER_METABOLIC_PROCESS;BLALOCK_ALZHEIMERS_DISEASE_INCIPIENT_UP;BLALOCK_ALZHEIMERS_DISEASE_UP;BRUINS_UVC_RESPONSE_EARLY_LATE;BURTON_ADIPOGENESIS_12;BYSTRYKH_HEMA…	3D-structure;Acetylation;Alternativesplicing;Chromatinregulator;Completeproteome;Directproteinsequencing;DNA-binding;Mentalretardation;Neurogenesis;Nucleus;Phosphoprotein;Polymorphism;Referenceproteome;Transcription;Transcriptionregulation
0.267902	NaN	1.00043	1.06433	NaN	1.0568	0.284969	NaN	NaN	0.730571	-0.20902	0.124369	0.0239193	NaN	NaN	NaN	0.648609	0.846129	-1.58464	0.227171	NaN	-1.46399	0.171861	-1.54069	-1.27257	NaN	NaN	NaN	NaN	1.18082	0.10692	0.460369	0.546725	0.0339605	0.648609	0.13939	-0.509219	0.102826	S	3	___1	anatomical structure development;anatomical structure formation involved in morphogenesis;androgen receptor signaling pathway;ATP-dependent chromatin remodeling;biological regulation;biosynthetic process;blood vessel development;cardiac chamber development;cellular biosynthetic process;cellular component disassembly;cellular component disassembly at cellular level;cellular component organization;…	binding;DNA binding;ligand-dependent nuclear receptor binding;nucleic acid binding;protein binding;protein binding transcription factor activity;receptor binding;transcription coactivator activity;transcription cofactor activity;transcription factor binding transcription factor activity	cell part;chromatin;chromatin remodeling complex;chromosomal part;intracellular membrane-bounded organelle;intracellular organelle;intracellular organelle part;intracellular part;macromolecular complex;membrane-bounded organelle;nBAF complex;npBAF complex;nuclear chromatin;nuclear chromosome part;nuclear part;nucleoplasm;nucleus;organelle;organelle part;protein complex;SWI/SNF complex;SWI/SNF-typ…	anatomical structure development;anatomical structure formation involved in morphogenesis;biological regulation;biosynthetic process;cellular component disassembly;cellular component organization;cellular metabolic process;cellular nitrogen compound metabolic process;cellular process;chromatin modification;chromatin organization;chromosome organization;developmental process;macromolecule metaboli…	cell part;chromatin remodeling complex;intracellular membrane-bounded organelle;intracellular organelle;macromolecular complex;nucleoplasm;nucleus;organelle;protein complex		ARID;DUF3518	AAAYRNCTG_UNKNOWN;AACTTT_UNKNOWN;ACACTGG,MIR-199A,MIR-199B;ACCAAAG,MIR-9;AGCTCCT,MIR-28;AGGGCAG,MIR-18A;ANDROGEN_RECEPTOR_SIGNALING_PATHWAY;ATAAGCT,MIR-21;ATACTGT,MIR-144;ATGTACA,MIR-493;ATGTAGC,MIR-221,MIR-222;BENPORATH_EED_TARGETS;BIOPOLYMER_METABOLIC_PROCESS;BLALOCK_ALZHEIMERS_DISEASE_INCIPIENT_UP;BLALOCK_ALZHEIMERS_DISEASE_UP;BRUINS_UVC_RESPONSE_EARLY_LATE;BURTON_ADIPOGENESIS_12;BYSTRYKH_HEMA…	3D-structure;Acetylation;Alternativesplicing;Chromatinregulator;Completeproteome;Directproteinsequencing;DNA-binding;Mentalretardation;Neurogenesis;Nucleus;Phosphoprotein;Polymorphism;Referenceproteome;Transcription;Transcriptionregulation
NaN	-0.174201	-0.0833641	-0.23407	NaN	-0.42985	NaN	NaN	-0.60091	NaN	NaN	-0.474506	NaN	NaN	NaN	NaN	NaN	NaN	-0.939177	-0.585345	-0.0136798	NaN	-0.36285	-0.543913	-0.205241	NaN	NaN	0.196392	NaN	-0.361502	-0.501297	NaN	NaN	0.79983	-0.33196	-0.36285	-0.0308902	0.479603	S	3	___1	anatomical structure development;anatomical structure formation involved in morphogenesis;androgen receptor signaling pathway;ATP-dependent chromatin remodeling;biological regulation;biosynthetic process;blood vessel development;cardiac chamber development;cellular biosynthetic process;cellular component disassembly;cellular component disassembly at cellular level;cellular component organization;…	binding;DNA binding;ligand-dependent nuclear receptor binding;nucleic acid binding;protein binding;protein binding transcription factor activity;receptor binding;transcription coactivator activity;transcription cofactor activity;transcription factor binding transcription factor activity	cell part;chromatin;chromatin remodeling complex;chromosomal part;intracellular membrane-bounded organelle;intracellular organelle;intracellular organelle part;intracellular part;macromolecular complex;membrane-bounded organelle;nBAF complex;npBAF complex;nuclear chromatin;nuclear chromosome part;nuclear part;nucleoplasm;nucleus;organelle;organelle part;protein complex;SWI/SNF complex;SWI/SNF-typ…	anatomical structure development;anatomical structure formation involved in morphogenesis;biological regulation;biosynthetic process;cellular component disassembly;cellular component organization;cellular metabolic process;cellular nitrogen compound metabolic process;cellular process;chromatin modification;chromatin organization;chromosome organization;developmental process;macromolecule metaboli…	cell part;chromatin remodeling complex;intracellular membrane-bounded organelle;intracellular organelle;macromolecular complex;nucleoplasm;nucleus;organelle;protein complex		ARID;DUF3518	AAAYRNCTG_UNKNOWN;AACTTT_UNKNOWN;ACACTGG,MIR-199A,MIR-199B;ACCAAAG,MIR-9;AGCTCCT,MIR-28;AGGGCAG,MIR-18A;ANDROGEN_RECEPTOR_SIGNALING_PATHWAY;ATAAGCT,MIR-21;ATACTGT,MIR-144;ATGTACA,MIR-493;ATGTAGC,MIR-221,MIR-222;BENPORATH_EED_TARGETS;BIOPOLYMER_METABOLIC_PROCESS;BLALOCK_ALZHEIMERS_DISEASE_INCIPIENT_UP;BLALOCK_ALZHEIMERS_DISEASE_UP;BRUINS_UVC_RESPONSE_EARLY_LATE;BURTON_ADIPOGENESIS_12;BYSTRYKH_HEMA…	3D-structure;Acetylation;Alternativesplicing;Chromatinregulator;Completeproteome;Directproteinsequencing;DNA-binding;Mentalretardation;Neurogenesis;Nucleus;Phosphoprotein;Polymorphism;Referenceproteome;Transcription;Transcriptionregulation
NaN	0.468609	NaN	0.652533	NaN	NaN	-0.897741	-0.306497	NaN	-0.230144	-0.00573252	NaN	0.3793	0.544937	0.400595	-0.0947685	-0.501795	NaN	NaN	0.101034	0.180685	-0.324789	NaN	-1.49721	-0.383663	0.259245	NaN	NaN	NaN	-1.33886	NaN	NaN	1.00899	0.406989	-0.00573252	-0.111877	-0.106145	0.439333	S	3	___1	biological regulation;positive regulation of biological process;positive regulation of cellular process;positive regulation of hormone secretion;positive regulation of insulin secretion;positive regulation of insulin secretion involved in cellular response to glucose stimulus;positive regulation of peptide hormone secretion;positive regulation of peptide secretion;positive regulation of secretion…		cell part;integral to membrane;intrinsic to membrane;membrane part	biological regulation;regulation of transport	cell part			ATF2_UP.V1_UP;BMI1_DN.V1_UP;BMI1_DN_MEL18_DN.V1_UP;BROWNE_HCMV_INFECTION_6HR_UP;CACGTG_V$MYC_Q2;CAGGTG_V$E12_Q6;CCCNNGGGAR_V$OLF1_01;chr11q23;CTTTAAR_UNKNOWN;DACOSTA_UV_RESPONSE_VIA_ERCC3_UP;DAIRKEE_TERT_TARGETS_DN;DCA_UP.V1_DN;DODD_NASOPHARYNGEAL_CARCINOMA_UP;EBAUER_TARGETS_OF_PAX3_FOXO1_FUSION_UP;GCANCTGNY_V$MYOD_Q6;GGATTA_V$PITX2_Q2;GGGAGGRR_V$MAZ_Q6;GGGCGGR_V$SP1_Q6;GGGTGGRR_V$PAX4_03;GSE1032…	Alternativesplicing;Completeproteome;Membrane;Phosphoprotein;Polymorphism;Referenceproteome;Transmembrane;Transmembranehelix
-0.503319	1.09368	0.437623	1.22587	0.780901	1.45858	-0.951716	NaN	-0.048823	1.42894	1.24081	0.719802	0.548375	0.83502	0.812549	NaN	0.332649	-0.91111	-0.214345	-0.582389	NaN	1.25239	-1.77049	-0.0741169	0.406943	1.34607	0.753026	0.108267	0.343369	0.415977	0.14167	1.2026	0.744853	0.418781	0.750352	0.375156	-0.375196	0.185246	S	2	___1	cellular component assembly;cellular component assembly at cellular level;cellular component organization;cellular component organization at cellular level;cellular component organization or biogenesis;cellular component organization or biogenesis at cellular level;cellular macromolecular complex assembly;cellular macromolecular complex subunit organization;cellular membrane organization;cellular…	AP-2 adaptor complex binding;binding;protein binding;protein complex binding	cell part;coated pit;membrane;membrane part;plasma membrane	cellular component assembly;cellular component organization;cellular macromolecular complex assembly;cellular membrane organization;cellular process;endocytosis;establishment of localization;macromolecular complex assembly;membrane invagination;membrane organization;organelle organization;protein complex assembly;transport;vesicle organization;vesicle-mediated transport	cell part;membrane;plasma membrane		FCH;muHD	BHAT_ESR1_TARGETS_VIA_AKT1_UP;BONOME_OVARIAN_CANCER_POOR_SURVIVAL_DN;BONOME_OVARIAN_CANCER_SURVIVAL_SUBOPTIMAL_DEBULKING;BRUINS_UVC_RESPONSE_VIA_TP53_GROUP_D;chr19p13;DASU_IL6_SIGNALING_SCAR_UP;DASU_IL6_SIGNALING_UP;E2F1_UP.V1_DN;GSE11864_CSF1_VS_CSF1_IFNG_IN_MAC_DN;GSE11924_TFH_VS_TH17_CD4_TCELL_UP;GSE12366_PLASMA_CELL_VS_NAIVE_BCELL_DN;GSE12845_IGD_POS_VS_NEG_BLOOD_BCELL_UP;GSE17721_0.5H_VS_24H…	Alternativesplicing;Coatedpit;Coiledcoil;Completeproteome;Endocytosis;Membrane;Phosphoprotein;Referenceproteome
-1.76928	NaN	NaN	0.20413	-0.410569	NaN	NaN	NaN	-0.861282	0.195148	NaN	-0.567007	NaN	NaN	NaN	NaN	NaN	NaN	-0.383657	NaN	-1.12248	NaN	NaN	NaN	NaN	0.535968	NaN	-0.920001	NaN	NaN	0.248161	NaN	NaN	0.650835	-0.488788	-0.383657	0.105131	0.34472	S	2	___1	biological regulation;negative regulation of biological process;negative regulation of defense response;negative regulation of immune response;negative regulation of immune system process;negative regulation of innate immune response;negative regulation of response to stimulus;regulation of biological process;regulation of defense response;regulation of immune response;regulation of immune system…	binding;cation binding;ion binding;metal ion binding		biological regulation;response to chemical stimulus;response to stimulus				BERENJENO_TRANSFORMED_BY_RHOA_DN;BERTUCCI_MEDULLARY_VS_DUCTAL_BREAST_CANCER_UP;BOSCO_ALLERGEN_INDUCED_TH2_ASSOCIATED_MODULE;BOSCO_INTERFERON_INDUCED_ANTIVIRAL_MODULE;BRACHAT_RESPONSE_TO_CAMPTOTHECIN_UP;BRACHAT_RESPONSE_TO_METHOTREXATE_UP;CASORELLI_ACUTE_PROMYELOCYTIC_LEUKEMIA_DN;chr12q;CREIGHTON_ENDOCRINE_THERAPY_RESISTANCE_5;CRX_DN.V1_UP;DEURIG_T_CELL_PROLYMPHOCYTIC_LEUKEMIA_DN;ESC_J1_UP_EARLY.V…	3D-structure;Acetylation;Alternativesplicing;Completeproteome;Metal-binding;Phosphoprotein;Referenceproteome;Zinc;Zinc-finger
NaN	NaN	NaN	NaN	NaN	0.748291	NaN	NaN	NaN	NaN	NaN	0.0504323	0.387985	NaN	-0.163621	NaN	NaN	0.457439	2.47523	NaN	NaN	NaN	NaN	-0.245485	NaN	1.01381	NaN	NaN	NaN	NaN	0.972415	NaN	0.797894	0.186416	0.387985	0.972415	0.58443	0.0518142	S	2	___1	biological regulation;negative regulation of biological process;negative regulation of defense response;negative regulation of immune response;negative regulation of immune system process;negative regulation of innate immune response;negative regulation of response to stimulus;regulation of biological process;regulation of defense response;regulation of immune response;regulation of immune system…	binding;cation binding;ion binding;metal ion binding		biological regulation;response to chemical stimulus;response to stimulus				BERENJENO_TRANSFORMED_BY_RHOA_DN;BERTUCCI_MEDULLARY_VS_DUCTAL_BREAST_CANCER_UP;BOSCO_ALLERGEN_INDUCED_TH2_ASSOCIATED_MODULE;BOSCO_INTERFERON_INDUCED_ANTIVIRAL_MODULE;BRACHAT_RESPONSE_TO_CAMPTOTHECIN_UP;BRACHAT_RESPONSE_TO_METHOTREXATE_UP;CASORELLI_ACUTE_PROMYELOCYTIC_LEUKEMIA_DN;chr12q;CREIGHTON_ENDOCRINE_THERAPY_RESISTANCE_5;CRX_DN.V1_UP;DEURIG_T_CELL_PROLYMPHOCYTIC_LEUKEMIA_DN;ESC_J1_UP_EARLY.V…	3D-structure;Acetylation;Alternativesplicing;Completeproteome;Metal-binding;Phosphoprotein;Referenceproteome;Zinc;Zinc-finger
NaN	-2.31593	NaN	-3.13082	-1.24341	NaN	NaN	-1.54325	-2.74657	NaN	-2.24179	-2.04709	-1.93536	-1.85544	NaN	NaN	-1.53354	NaN	NaN	NaN	NaN	-2.21511	NaN	NaN	NaN	-3.17475	NaN	-1.35239	-4.03347	-1.99844	-1.72554	-3.39439	NaN	0.261924	-1.99122	-2.21511	-0.223888	0.316408	S	3	___1	anatomical structure development;biological regulation;cell cycle phase;cell cycle process;cell differentiation;cell projection organization;cellular component organization;cellular component organization at cellular level;cellular component organization or biogenesis;cellular component organization or biogenesis at cellular level;cellular developmental process;cellular process;cellular response …	adenyl nucleotide binding;adenyl ribonucleotide binding;ATP binding;binding;catalytic activity;cation binding;ion binding;kinase activity;metal ion binding;nucleotide binding;PDZ domain binding;phosphotransferase activity, alcohol group as acceptor;protein binding;protein domain specific binding;protein kinase activity;protein serine/threonine kinase activity;purine nucleotide binding;purine ribo…	actin cytoskeleton;cell body;cell part;cell projection;cytoplasmic part;cytoskeleton;cytosol;Golgi apparatus part;Golgi cisterna;intracellular membrane-bounded organelle;intracellular non-membrane-bounded organelle;intracellular organelle;intracellular organelle part;intracellular part;membrane;membrane-bounded organelle;neuronal cell body;non-membrane-bounded organelle;organelle;organelle part;o…	anatomical structure development;biological regulation;cell differentiation;cellular component organization;cellular process;chromosome organization;chromosome segregation;cytokinesis;developmental process;Golgi organization;mitosis;multicellular organismal process;nuclear division;organelle fission;organelle organization;regulation of organelle organization;response to stimulus;signal transducti…	cell body;cell part;cell projection;cytoskeleton;cytosol;intracellular membrane-bounded organelle;intracellular non-membrane-bounded organelle;intracellular organelle;membrane;neuronal cell body;organelle;plasma membrane;vacuole		CNH;Pkinase;Pkinase_C	AAACCAC,MIR-140;ACTGTGA,MIR-27A,MIR-27B;AGGGCAG,MIR-18A;AGGTGCA,MIR-500;AMUNDSON_RESPONSE_TO_ARSENITE;ANATOMICAL_STRUCTURE_DEVELOPMENT;BENPORATH_CYCLING_GENES;BROWNE_HCMV_INFECTION_14HR_DN;BROWNE_HCMV_INFECTION_4HR_DN;CACCAGC,MIR-138;CADWELL_ATG16L1_TARGETS_UP;CAGCAGG,MIR-370;CELL_CYCLE_GO_0007049;CELL_CYCLE_PHASE;CELL_CYCLE_PROCESS;CELL_DEVELOPMENT;chr12q24;DUTERTRE_ESTRADIOL_RESPONSE_24HR_UP;GA…	Acetylation;Alternativesplicing;ATP-binding;Cellcycle;Celldivision;Coiledcoil;Completeproteome;Cytoplasm;Developmentalprotein;Differentiation;Kinase;Metal-binding;Mitosis;Neurogenesis;Nucleotide-binding;Phosphoprotein;Polymorphism;Referenceproteome;Serine/threonine-proteinkinase;SH3-binding;Transferase;Zinc;Zinc-finger
0.695767	0.91897	-0.271234	-0.673219	0.422178	-0.00627522	-1.26637	-0.284856	1.3745	0.0913545	0.0795418	-0.0819175	NaN	0.0502592	-0.938459	1.16049	-0.260983	0.454033	0.164875	-0.189847	0.421368	-0.111284	NaN	NaN	-1.10885	0.168923	NaN	NaN	NaN	-0.0570185	0.0503886	0.418182	NaN	0.627335	0.0502592	0.0503886	0.000129413	0.448039	S	2	___1	cellular component organization;cellular component organization at cellular level;cellular component organization or biogenesis;cellular component organization or biogenesis at cellular level;cellular process;COPI coating of Golgi vesicle;ER to Golgi vesicle-mediated transport;establishment of localization;establishment of localization in cell;establishment of protein localization;Golgi transport…	structural molecule activity	cell part;COPI vesicle coat;cytoplasmic part;cytoplasmic vesicle part;cytosol;Golgi apparatus;Golgi apparatus part;intracellular membrane-bounded organelle;intracellular organelle;intracellular organelle part;intracellular part;macromolecular complex;membrane coat;membrane part;membrane-bounded organelle;nuclear part;nucleoplasm;organelle;organelle part;protein complex;vesicle coat	cellular component organization;cellular process;establishment of localization;Golgi vesicle transport;membrane organization;organelle organization;protein transport;transport;vesicle organization;vesicle-mediated transport	cell part;cytosol;Golgi apparatus;intracellular membrane-bounded organelle;intracellular organelle;macromolecular complex;nucleoplasm;organelle;protein complex		Coatomer_E	ACEVEDO_LIVER_TUMOR_VS_NORMAL_ADJACENT_TISSUE_UP;BENPORATH_NANOG_TARGETS;CAMP_UP.V1_UP;CELLULAR_LOCALIZATION;CHAUHAN_RESPONSE_TO_METHOXYESTRADIOL_DN;chr19p13;COATED_MEMBRANE;COATED_VESICLE;COATED_VESICLE_MEMBRANE;CYTOPLASM;CYTOPLASMIC_MEMBRANE_BOUND_VESICLE;CYTOPLASMIC_PART;CYTOPLASMIC_VESICLE;CYTOPLASMIC_VESICLE_MEMBRANE;CYTOPLASMIC_VESICLE_PART;ENDOMEMBRANE_SYSTEM;ENK_UV_RESPONSE_KERATINOCYTE_U…	Alternativesplicing;Completeproteome;Cytoplasm;Cytoplasmicvesicle;Directproteinsequencing;ER-Golgitransport;Golgiapparatus;Membrane;Phosphoprotein;Polymorphism;Proteintransport;Referenceproteome;Transport;Ublconjugation
-0.600192	0.775887	0.124207	0.998944	0.638606	0.918061	-0.502404	-0.651272	0.258376	1.24943	0.900546	0.177925	NaN	0.530086	-0.349253	1.10932	-0.13901	-0.495514	0.33238	-0.231403	0.928491	0.807091	-0.215261	0.717298	0.523792	1.6222	NaN	NaN	0.819804	-0.209189	1.28095	0.444575	NaN	0.243682	0.258376	0.620545	0.362169	0.145003	S	3	___1	anterograde axon cargo transport;anterograde synaptic vesicle transport;antigen processing and presentation;antigen processing and presentation of exogenous antigen;antigen processing and presentation of lipid antigen via MHC class Ib;antigen processing and presentation via MHC class Ib;antigen processing and presentation, exogenous lipid antigen via MHC class Ib;axon cargo transport;biological r…	transporter activity	axon part;cell part;cell projection part;cytoplasmic part;endosomal part;endosome membrane;Golgi apparatus;Golgi apparatus part;Golgi membrane;intracellular membrane-bounded organelle;intracellular organelle;intracellular organelle part;intracellular part;lysosomal membrane;macromolecular complex;membrane;membrane coat;membrane part;membrane-bounded organelle;nuclear part;nucleoplasm;organelle;or…	biological regulation;biosynthetic process;cellular component movement;cellular component organization;cellular localization;cellular membrane organization;cellular process;cytoskeleton-dependent intracellular transport;endosome transport;establishment of localization;immune system process;localization;membrane organization;metabolic process;organelle organization;pigment granule organization;pig…	cell part;Golgi apparatus;intracellular membrane-bounded organelle;intracellular organelle;macromolecular complex;membrane;nucleoplasm;organelle;protein complex	Lysosome	Adaptin_N;BLVR	ACATTCC,MIR-1,MIR-206;BENPORATH_CYCLING_GENES;BIOSYNTHETIC_PROCESS;CACGTG_V$MYC_Q2;CAGCTG_V$AP4_Q5;CELLULAR_BIOSYNTHETIC_PROCESS;CELLULAR_LOCALIZATION;CGCTGCT,MIR-503;CHIARETTI_ACUTE_LYMPHOBLASTIC_LEUKEMIA_ZAP70;chr19p13;CYTOPLASM;CYTOPLASMIC_PART;ESTABLISHMENT_OF_CELLULAR_LOCALIZATION;ESTABLISHMENT_OF_LOCALIZATION;ESTABLISHMENT_OF_PROTEIN_LOCALIZATION;FLECHNER_BIOPSY_KIDNEY_TRANSPLANT_OK_VS_DONO…	3D-structure;Acetylation;Alternativesplicing;Coiledcoil;Completeproteome;Cytoplasm;Golgiapparatus;Membrane;Phosphoprotein;Polymorphism;Proteintransport;Referenceproteome;Repeat;Transport
-2.13385	NaN	-2.87074	-0.919905	NaN	-1.69146	-2.7378	-2.80655	-1.57241	-2.12871	NaN	NaN	-1.96366	-2.57707	-2.35475	NaN	-2.69576	-2.33409	-0.6362	0.614057	NaN	NaN	-2.67736	-1.92731	-2.16343	-1.56531	NaN	-2.08467	NaN	-1.16472	-1.0932	NaN	-1.64726	0.0351637	-2.33409	-1.60629	0.727803	0.0230318	S	3	___1	anterograde axon cargo transport;anterograde synaptic vesicle transport;antigen processing and presentation;antigen processing and presentation of exogenous antigen;antigen processing and presentation of lipid antigen via MHC class Ib;antigen processing and presentation via MHC class Ib;antigen processing and presentation, exogenous lipid antigen via MHC class Ib;axon cargo transport;biological r…	transporter activity	axon part;cell part;cell projection part;cytoplasmic part;endosomal part;endosome membrane;Golgi apparatus;Golgi apparatus part;Golgi membrane;intracellular membrane-bounded organelle;intracellular organelle;intracellular organelle part;intracellular part;lysosomal membrane;macromolecular complex;membrane;membrane coat;membrane part;membrane-bounded organelle;nuclear part;nucleoplasm;organelle;or…	biological regulation;biosynthetic process;cellular component movement;cellular component organization;cellular localization;cellular membrane organization;cellular process;cytoskeleton-dependent intracellular transport;endosome transport;establishment of localization;immune system process;localization;membrane organization;metabolic process;organelle organization;pigment granule organization;pig…	cell part;Golgi apparatus;intracellular membrane-bounded organelle;intracellular organelle;macromolecular complex;membrane;nucleoplasm;organelle;protein complex	Lysosome	Adaptin_N;BLVR	ACATTCC,MIR-1,MIR-206;BENPORATH_CYCLING_GENES;BIOSYNTHETIC_PROCESS;CACGTG_V$MYC_Q2;CAGCTG_V$AP4_Q5;CELLULAR_BIOSYNTHETIC_PROCESS;CELLULAR_LOCALIZATION;CGCTGCT,MIR-503;CHIARETTI_ACUTE_LYMPHOBLASTIC_LEUKEMIA_ZAP70;chr19p13;CYTOPLASM;CYTOPLASMIC_PART;ESTABLISHMENT_OF_CELLULAR_LOCALIZATION;ESTABLISHMENT_OF_LOCALIZATION;ESTABLISHMENT_OF_PROTEIN_LOCALIZATION;FLECHNER_BIOPSY_KIDNEY_TRANSPLANT_OK_VS_DONO…	3D-structure;Acetylation;Alternativesplicing;Coiledcoil;Completeproteome;Cytoplasm;Golgiapparatus;Membrane;Phosphoprotein;Polymorphism;Proteintransport;Referenceproteome;Repeat;Transport
NaN	-0.141707	-0.54325	0.115256	0.160558	0.177195	NaN	NaN	-0.144542	0.409607	-0.117864	-0.734838	NaN	0.206988	NaN	NaN	NaN	-0.65559	0.204594	0.640595	NaN	-0.803338	NaN	NaN	NaN	-0.052618	NaN	0.265625	NaN	-0.374882	0.214797	NaN	NaN	0.55838	-0.117864	0.204594	0.322458	0.169441	S	3	___1	anterograde axon cargo transport;anterograde synaptic vesicle transport;antigen processing and presentation;antigen processing and presentation of exogenous antigen;antigen processing and presentation of lipid antigen via MHC class Ib;antigen processing and presentation via MHC class Ib;antigen processing and presentation, exogenous lipid antigen via MHC class Ib;axon cargo transport;biological r…	transporter activity	axon part;cell part;cell projection part;cytoplasmic part;endosomal part;endosome membrane;Golgi apparatus;Golgi apparatus part;Golgi membrane;intracellular membrane-bounded organelle;intracellular organelle;intracellular organelle part;intracellular part;lysosomal membrane;macromolecular complex;membrane;membrane coat;membrane part;membrane-bounded organelle;nuclear part;nucleoplasm;organelle;or…	biological regulation;biosynthetic process;cellular component movement;cellular component organization;cellular localization;cellular membrane organization;cellular process;cytoskeleton-dependent intracellular transport;endosome transport;establishment of localization;immune system process;localization;membrane organization;metabolic process;organelle organization;pigment granule organization;pig…	cell part;Golgi apparatus;intracellular membrane-bounded organelle;intracellular organelle;macromolecular complex;membrane;nucleoplasm;organelle;protein complex	Lysosome	Adaptin_N;BLVR	ACATTCC,MIR-1,MIR-206;BENPORATH_CYCLING_GENES;BIOSYNTHETIC_PROCESS;CACGTG_V$MYC_Q2;CAGCTG_V$AP4_Q5;CELLULAR_BIOSYNTHETIC_PROCESS;CELLULAR_LOCALIZATION;CGCTGCT,MIR-503;CHIARETTI_ACUTE_LYMPHOBLASTIC_LEUKEMIA_ZAP70;chr19p13;CYTOPLASM;CYTOPLASMIC_PART;ESTABLISHMENT_OF_CELLULAR_LOCALIZATION;ESTABLISHMENT_OF_LOCALIZATION;ESTABLISHMENT_OF_PROTEIN_LOCALIZATION;FLECHNER_BIOPSY_KIDNEY_TRANSPLANT_OK_VS_DONO…	3D-structure;Acetylation;Alternativesplicing;Coiledcoil;Completeproteome;Cytoplasm;Golgiapparatus;Membrane;Phosphoprotein;Polymorphism;Proteintransport;Referenceproteome;Repeat;Transport
NaN	NaN	2.74077	NaN	2.37349	2.81194	NaN	NaN	-0.260179	2.35008	3.17979	2.41677	2.49316	2.52456	1.64149	NaN	NaN	2.61891	NaN	NaN	NaN	NaN	1.03156	NaN	0.721699	2.26189	1.56666	NaN	1.28589	1.29096	2.07327	NaN	1.81956	0.0370507	2.49316	1.42881	-1.06435	0.00256777	S	2	___1	biological regulation;cation transport;cellular metabolic process;cellular process;cellular response to chemical stimulus;cellular response to oxidative stress;cellular response to oxygen radical;cellular response to reactive oxygen species;cellular response to stimulus;cellular response to stress;cellular response to superoxide;copper ion transmembrane transport;copper ion transport;establishmen…	antioxidant activity;binding;catalytic activity;cation binding;cation transmembrane transporter activity;copper ion binding;copper ion transmembrane transporter activity;disulfide oxidoreductase activity;inorganic cation transmembrane transporter activity;ion binding;ion transmembrane transporter activity;metal ion binding;metal ion transmembrane transporter activity;oxidoreductase activity;oxido…	cell part;cytoplasm;cytoplasmic part;cytosol;intracellular membrane-bounded organelle;intracellular organelle;intracellular part;membrane-bounded organelle;nucleus;organelle	biological regulation;cellular metabolic process;cellular process;establishment of localization;ion transport;metabolic process;response to chemical stimulus;response to oxidative stress;response to stimulus;response to stress;transmembrane transport;transport	cell part;cytoplasm;cytosol;intracellular membrane-bounded organelle;intracellular organelle;nucleus;organelle	Amyotrophic lateral sclerosis (ALS)	HMA;Sod_Cu	ABE_INNER_EAR;BAKKER_FOXO3_TARGETS_DN;BROWNE_HCMV_INFECTION_4HR_DN;BYSTRYKH_HEMATOPOIESIS_STEM_CELL_QTL_TRANS;CATION_BINDING;CATION_TRANSMEMBRANE_TRANSPORTER_ACTIVITY;CATION_TRANSPORT;CELL_FRACTION;CELLULAR_LOCALIZATION;chr11q13;COPPER_ION_BINDING;CYTOPLASM;DAIRKEE_TERT_TARGETS_UP;DI___TRI_VALENT_INORGANIC_CATION_TRANSMEMBRANE_TRANSPORTER_ACTIVITY;ESTABLISHMENT_OF_CELLULAR_LOCALIZATION;ESTABLISHM…	3D-structure;Chaperone;Completeproteome;Copper;Cytoplasm;Disulfidebond;Isopeptidebond;Metal-binding;Phosphoprotein;Polymorphism;Referenceproteome;Ublconjugation;Zinc
NaN	NaN	1.88333	2.895	NaN	1.25528	NaN	4.67531	2.1234	NaN	2.19283	3.42072	2.96137	3.75631	4.57887	NaN	3.09536	NaN	2.5567	NaN	2.87188	NaN	NaN	3.10155	3.92543	3.09733	NaN	NaN	3.62259	2.0168	2.74631	NaN	2.8371	0.978813	2.96137	2.87188	-0.0894921	0.457521	S	3	___1	anatomical structure formation involved in morphogenesis;anatomical structure morphogenesis;axon guidance;biological regulation;cell projection assembly;cell projection organization;cellular component assembly;cellular component assembly at cellular level;cellular component assembly involved in morphogenesis;cellular component organization;cellular component organization at cellular level;cellula…	actin binding;binding;cation binding;cytoskeletal protein binding;ion binding;metal ion binding;protein binding;transition metal ion binding;zinc ion binding	actin cytoskeleton;actin filament bundle;actomyosin;cell part;cell projection;cytoplasm;cytoskeletal part;cytoskeleton;intracellular non-membrane-bounded organelle;intracellular organelle;intracellular organelle part;intracellular part;lamellipodium;non-membrane-bounded organelle;organelle;organelle part;stress fiber	anatomical structure formation involved in morphogenesis;anatomical structure morphogenesis;biological regulation;cellular component assembly;cellular component organization;cellular process;cytoskeleton organization;developmental process;locomotion;multicellular organismal process;neurological system process;organelle organization;response to chemical stimulus;response to external stimulus;respo…	cell part;cell projection;cytoplasm;cytoskeleton;intracellular non-membrane-bounded organelle;intracellular organelle;organelle	Axon guidance	LIM;VHP	ACTIN_BINDING;ACTIN_CYTOSKELETON;ANATOMICAL_STRUCTURE_DEVELOPMENT;ANATOMICAL_STRUCTURE_MORPHOGENESIS;BENPORATH_SOX2_TARGETS;BERENJENO_TRANSFORMED_BY_RHOA_DN;BLALOCK_ALZHEIMERS_DISEASE_UP;BRACHAT_RESPONSE_TO_CISPLATIN;BRACHAT_RESPONSE_TO_METHOTREXATE_UP;BROWNE_HCMV_INFECTION_24HR_UP;BRUECKNER_TARGETS_OF_MIRLET7A3_UP;CAGCTG_V$AP4_Q5;CAMP_UP.V1_DN;CASORELLI_ACUTE_PROMYELOCYTIC_LEUKEMIA_DN;CHEOK_RESP…	Actin-binding;Alternativesplicing;Coiledcoil;Completeproteome;Cytoplasm;Cytoskeleton;LIMdomain;Metal-binding;Phosphoprotein;Polymorphism;Referenceproteome;Repeat;Zinc
NaN	NaN	NaN	NaN	NaN	0.703191	NaN	3.34248	2.20375	NaN	NaN	NaN	NaN	3.72508	3.77101	NaN	1.14797	NaN	NaN	2.14775	4.75231	NaN	1.54821	3.12001	4.21031	0.516743	NaN	NaN	0.58807	1.65537	NaN	NaN	2.70514	0.871551	2.77312	2.14775	-0.625365	0.0563344	S	2	___1	anatomical structure formation involved in morphogenesis;anatomical structure morphogenesis;axon guidance;biological regulation;cell projection assembly;cell projection organization;cellular component assembly;cellular component assembly at cellular level;cellular component assembly involved in morphogenesis;cellular component organization;cellular component organization at cellular level;cellula…	actin binding;binding;cation binding;cytoskeletal protein binding;ion binding;metal ion binding;protein binding;transition metal ion binding;zinc ion binding	actin cytoskeleton;actin filament bundle;actomyosin;cell part;cell projection;cytoplasm;cytoskeletal part;cytoskeleton;intracellular non-membrane-bounded organelle;intracellular organelle;intracellular organelle part;intracellular part;lamellipodium;non-membrane-bounded organelle;organelle;organelle part;stress fiber	anatomical structure formation involved in morphogenesis;anatomical structure morphogenesis;biological regulation;cellular component assembly;cellular component organization;cellular process;cytoskeleton organization;developmental process;locomotion;multicellular organismal process;neurological system process;organelle organization;response to chemical stimulus;response to external stimulus;respo…	cell part;cell projection;cytoplasm;cytoskeleton;intracellular non-membrane-bounded organelle;intracellular organelle;organelle	Axon guidance	LIM;VHP	ACTIN_BINDING;ACTIN_CYTOSKELETON;ANATOMICAL_STRUCTURE_DEVELOPMENT;ANATOMICAL_STRUCTURE_MORPHOGENESIS;BENPORATH_SOX2_TARGETS;BERENJENO_TRANSFORMED_BY_RHOA_DN;BLALOCK_ALZHEIMERS_DISEASE_UP;BRACHAT_RESPONSE_TO_CISPLATIN;BRACHAT_RESPONSE_TO_METHOTREXATE_UP;BROWNE_HCMV_INFECTION_24HR_UP;BRUECKNER_TARGETS_OF_MIRLET7A3_UP;CAGCTG_V$AP4_Q5;CAMP_UP.V1_DN;CASORELLI_ACUTE_PROMYELOCYTIC_LEUKEMIA_DN;CHEOK_RESP…	Actin-binding;Alternativesplicing;Coiledcoil;Completeproteome;Cytoplasm;Cytoskeleton;LIMdomain;Metal-binding;Phosphoprotein;Polymorphism;Referenceproteome;Repeat;Zinc
0.279053	0.0646777	NaN	-0.880881	-0.188664	-0.968197	0.342724	0.0710108	-0.331768	-0.273488	0.192436	0.134162	-0.0845132	-0.0661971	0.175696	0.151401	0.653202	-0.340936	-0.827218	-0.207674	-0.720515	-0.326826	-1.60893	0.187518	-1.30046	-0.223099	-0.738173	-0.704252	-0.43223	-0.808476	-0.528755	NaN	-0.302243	0.00191194	0.0646777	-0.616504	-0.681181	0.0408919	S	3	___1	biological regulation;biosynthetic process;cellular biosynthetic process;cellular component organization;cellular component organization at cellular level;cellular component organization or biogenesis;cellular component organization or biogenesis at cellular level;cellular macromolecule biosynthetic process;cellular macromolecule metabolic process;cellular metabolic process;cellular nitrogen comp…	adenyl nucleotide binding;adenyl ribonucleotide binding;ATP binding;ATPase activity;ATPase activity, coupled;ATP-dependent DNA helicase activity;ATP-dependent helicase activity;binding;catalytic activity;DNA binding;DNA helicase activity;DNA-dependent ATPase activity;helicase activity;histone binding;hydrolase activity;hydrolase activity, acting on acid anhydrides;hydrolase activity, acting on ac…	cell part;cytoplasm;intracellular membrane-bounded organelle;intracellular organelle;intracellular part;membrane-bounded organelle;nucleus;organelle	biological regulation;biosynthetic process;cellular component organization;cellular metabolic process;cellular nitrogen compound metabolic process;cellular process;chromatin modification;chromatin organization;chromosome organization;DNA geometric change;DNA metabolic process;interspecies interaction between organisms;macromolecule metabolic process;metabolic process;multi-organism process;nitrog…	cell part;cytoplasm;intracellular membrane-bounded organelle;intracellular organelle;nucleus;organelle		Chromo;DUF4208;Helicase_C;SNF2_N	ACEVEDO_NORMAL_TISSUE_ADJACENT_TO_LIVER_TUMOR_UP;ATP_DEPENDENT_DNA_HELICASE_ACTIVITY;ATP_DEPENDENT_HELICASE_ACTIVITY;ATPASE_ACTIVITY;ATPASE_ACTIVITY_COUPLED;BASSO_CD40_SIGNALING_UP;BERENJENO_TRANSFORMED_BY_RHOA_FOREVER_DN;BERENJENO_TRANSFORMED_BY_RHOA_UP;BIOPOLYMER_METABOLIC_PROCESS;BLALOCK_ALZHEIMERS_DISEASE_UP;BOCHKIS_FOXA2_TARGETS;BROWNE_HCMV_INFECTION_16HR_UP;BYSTRYKH_HEMATOPOIESIS_STEM_CELL_…	3D-structure;Alternativesplicing;ATP-binding;Chromatinregulator;Completeproteome;Cytoplasm;DNA-binding;Helicase;Hydrolase;Nucleotide-binding;Nucleus;Phosphoprotein;Polymorphism;Referenceproteome;Repeat;Transcription;Transcriptionregulation
NaN	NaN	-2.51015	NaN	NaN	-1.55847	0.770738	0.851052	NaN	-0.107406	NaN	NaN	0.94676	NaN	0.0850363	NaN	NaN	-3.25611	-0.981617	NaN	NaN	NaN	-3.24952	-0.500651	NaN	-0.864962	0.289594	NaN	NaN	NaN	0.176023	NaN	NaN	0.746808	-0.0111849	-0.682806	-0.671621	0.0432615	S	4	___1	biological regulation;biosynthetic process;cellular biosynthetic process;cellular component organization;cellular component organization at cellular level;cellular component organization or biogenesis;cellular component organization or biogenesis at cellular level;cellular macromolecule biosynthetic process;cellular macromolecule metabolic process;cellular metabolic process;cellular nitrogen comp…	adenyl nucleotide binding;adenyl ribonucleotide binding;ATP binding;ATPase activity;ATPase activity, coupled;ATP-dependent DNA helicase activity;ATP-dependent helicase activity;binding;catalytic activity;DNA binding;DNA helicase activity;DNA-dependent ATPase activity;helicase activity;histone binding;hydrolase activity;hydrolase activity, acting on acid anhydrides;hydrolase activity, acting on ac…	cell part;cytoplasm;intracellular membrane-bounded organelle;intracellular organelle;intracellular part;membrane-bounded organelle;nucleus;organelle	biological regulation;biosynthetic process;cellular component organization;cellular metabolic process;cellular nitrogen compound metabolic process;cellular process;chromatin modification;chromatin organization;chromosome organization;DNA geometric change;DNA metabolic process;interspecies interaction between organisms;macromolecule metabolic process;metabolic process;multi-organism process;nitrog…	cell part;cytoplasm;intracellular membrane-bounded organelle;intracellular organelle;nucleus;organelle		Chromo;DUF4208;Helicase_C;SNF2_N	ACEVEDO_NORMAL_TISSUE_ADJACENT_TO_LIVER_TUMOR_UP;ATP_DEPENDENT_DNA_HELICASE_ACTIVITY;ATP_DEPENDENT_HELICASE_ACTIVITY;ATPASE_ACTIVITY;ATPASE_ACTIVITY_COUPLED;BASSO_CD40_SIGNALING_UP;BERENJENO_TRANSFORMED_BY_RHOA_FOREVER_DN;BERENJENO_TRANSFORMED_BY_RHOA_UP;BIOPOLYMER_METABOLIC_PROCESS;BLALOCK_ALZHEIMERS_DISEASE_UP;BOCHKIS_FOXA2_TARGETS;BROWNE_HCMV_INFECTION_16HR_UP;BYSTRYKH_HEMATOPOIESIS_STEM_CELL_…	3D-structure;Alternativesplicing;ATP-binding;Chromatinregulator;Completeproteome;Cytoplasm;DNA-binding;Helicase;Hydrolase;Nucleotide-binding;Nucleus;Phosphoprotein;Polymorphism;Referenceproteome;Repeat;Transcription;Transcriptionregulation
NaN	-0.326402	NaN	NaN	0.156638	-0.850857	-0.0320706	-0.228287	0.306309	-1.17379	-0.0220232	-0.370991	0.0676089	NaN	-0.535309	0.605635	0.852976	0.154793	-1.5757	NaN	NaN	NaN	NaN	-0.352263	NaN	-0.439184	-3.41132	-1.05928	-0.245957	-0.417971	-0.761575	-1.56307	-0.856121	0.0122025	-0.0270469	-0.808848	-0.781801	0.0217823	S	2	___1	biological regulation;biosynthetic process;cellular biosynthetic process;cellular component organization;cellular component organization at cellular level;cellular component organization or biogenesis;cellular component organization or biogenesis at cellular level;cellular macromolecule biosynthetic process;cellular macromolecule metabolic process;cellular metabolic process;cellular nitrogen comp…	adenyl nucleotide binding;adenyl ribonucleotide binding;ATP binding;ATPase activity;ATPase activity, coupled;ATP-dependent DNA helicase activity;ATP-dependent helicase activity;binding;catalytic activity;DNA binding;DNA helicase activity;DNA-dependent ATPase activity;helicase activity;histone binding;hydrolase activity;hydrolase activity, acting on acid anhydrides;hydrolase activity, acting on ac…	cell part;cytoplasm;intracellular membrane-bounded organelle;intracellular organelle;intracellular part;membrane-bounded organelle;nucleus;organelle	biological regulation;biosynthetic process;cellular component organization;cellular metabolic process;cellular nitrogen compound metabolic process;cellular process;chromatin modification;chromatin organization;chromosome organization;DNA geometric change;DNA metabolic process;interspecies interaction between organisms;macromolecule metabolic process;metabolic process;multi-organism process;nitrog…	cell part;cytoplasm;intracellular membrane-bounded organelle;intracellular organelle;nucleus;organelle		Chromo;DUF4208;Helicase_C;SNF2_N	ACEVEDO_NORMAL_TISSUE_ADJACENT_TO_LIVER_TUMOR_UP;ATP_DEPENDENT_DNA_HELICASE_ACTIVITY;ATP_DEPENDENT_HELICASE_ACTIVITY;ATPASE_ACTIVITY;ATPASE_ACTIVITY_COUPLED;BASSO_CD40_SIGNALING_UP;BERENJENO_TRANSFORMED_BY_RHOA_FOREVER_DN;BERENJENO_TRANSFORMED_BY_RHOA_UP;BIOPOLYMER_METABOLIC_PROCESS;BLALOCK_ALZHEIMERS_DISEASE_UP;BOCHKIS_FOXA2_TARGETS;BROWNE_HCMV_INFECTION_16HR_UP;BYSTRYKH_HEMATOPOIESIS_STEM_CELL_…	3D-structure;Alternativesplicing;ATP-binding;Chromatinregulator;Completeproteome;Cytoplasm;DNA-binding;Helicase;Hydrolase;Nucleotide-binding;Nucleus;Phosphoprotein;Polymorphism;Referenceproteome;Repeat;Transcription;Transcriptionregulation
0.279053	0.0646777	NaN	-0.880881	-0.188664	-0.968197	0.342724	0.0710108	-0.331768	-0.273488	0.192436	0.134162	-0.0845132	-0.0661971	0.175696	0.151401	0.653202	-0.340936	-0.827218	-0.207674	-0.720515	-0.326826	-1.60893	0.187518	-1.30046	-0.223099	-0.738173	-0.704252	-0.43223	-0.808476	-0.528755	NaN	-0.302243	0.00191194	0.0646777	-0.616504	-0.681181	0.0408919	S	3	___1	biological regulation;biosynthetic process;cellular biosynthetic process;cellular component organization;cellular component organization at cellular level;cellular component organization or biogenesis;cellular component organization or biogenesis at cellular level;cellular macromolecule biosynthetic process;cellular macromolecule metabolic process;cellular metabolic process;cellular nitrogen comp…	adenyl nucleotide binding;adenyl ribonucleotide binding;ATP binding;ATPase activity;ATPase activity, coupled;ATP-dependent DNA helicase activity;ATP-dependent helicase activity;binding;catalytic activity;DNA binding;DNA helicase activity;DNA-dependent ATPase activity;helicase activity;histone binding;hydrolase activity;hydrolase activity, acting on acid anhydrides;hydrolase activity, acting on ac…	cell part;cytoplasm;intracellular membrane-bounded organelle;intracellular organelle;intracellular part;membrane-bounded organelle;nucleus;organelle	biological regulation;biosynthetic process;cellular component organization;cellular metabolic process;cellular nitrogen compound metabolic process;cellular process;chromatin modification;chromatin organization;chromosome organization;DNA geometric change;DNA metabolic process;interspecies interaction between organisms;macromolecule metabolic process;metabolic process;multi-organism process;nitrog…	cell part;cytoplasm;intracellular membrane-bounded organelle;intracellular organelle;nucleus;organelle		Chromo;DUF4208;Helicase_C;SNF2_N	ACEVEDO_NORMAL_TISSUE_ADJACENT_TO_LIVER_TUMOR_UP;ATP_DEPENDENT_DNA_HELICASE_ACTIVITY;ATP_DEPENDENT_HELICASE_ACTIVITY;ATPASE_ACTIVITY;ATPASE_ACTIVITY_COUPLED;BASSO_CD40_SIGNALING_UP;BERENJENO_TRANSFORMED_BY_RHOA_FOREVER_DN;BERENJENO_TRANSFORMED_BY_RHOA_UP;BIOPOLYMER_METABOLIC_PROCESS;BLALOCK_ALZHEIMERS_DISEASE_UP;BOCHKIS_FOXA2_TARGETS;BROWNE_HCMV_INFECTION_16HR_UP;BYSTRYKH_HEMATOPOIESIS_STEM_CELL_…	3D-structure;Alternativesplicing;ATP-binding;Chromatinregulator;Completeproteome;Cytoplasm;DNA-binding;Helicase;Hydrolase;Nucleotide-binding;Nucleus;Phosphoprotein;Polymorphism;Referenceproteome;Repeat;Transcription;Transcriptionregulation
NaN	-0.326402	NaN	NaN	0.156638	-0.850857	-0.0320706	-0.228287	0.306309	-1.17379	-0.0220232	-0.370991	0.0676089	0.258961	-0.535309	0.605635	0.852976	0.154793	-1.5757	NaN	NaN	NaN	NaN	-0.352263	NaN	-0.439184	NaN	-1.05928	-0.245957	-0.417971	-0.761575	-1.56307	-0.856121	0.00341945	-0.0220232	-0.761575	-0.739552	0.0286118	S	2	___1	biological regulation;biosynthetic process;cellular biosynthetic process;cellular component organization;cellular component organization at cellular level;cellular component organization or biogenesis;cellular component organization or biogenesis at cellular level;cellular macromolecule biosynthetic process;cellular macromolecule metabolic process;cellular metabolic process;cellular nitrogen comp…	adenyl nucleotide binding;adenyl ribonucleotide binding;ATP binding;ATPase activity;ATPase activity, coupled;ATP-dependent DNA helicase activity;ATP-dependent helicase activity;binding;catalytic activity;DNA binding;DNA helicase activity;DNA-dependent ATPase activity;helicase activity;histone binding;hydrolase activity;hydrolase activity, acting on acid anhydrides;hydrolase activity, acting on ac…	cell part;cytoplasm;intracellular membrane-bounded organelle;intracellular organelle;intracellular part;membrane-bounded organelle;nucleus;organelle	biological regulation;biosynthetic process;cellular component organization;cellular metabolic process;cellular nitrogen compound metabolic process;cellular process;chromatin modification;chromatin organization;chromosome organization;DNA geometric change;DNA metabolic process;interspecies interaction between organisms;macromolecule metabolic process;metabolic process;multi-organism process;nitrog…	cell part;cytoplasm;intracellular membrane-bounded organelle;intracellular organelle;nucleus;organelle		Chromo;DUF4208;Helicase_C;SNF2_N	ACEVEDO_NORMAL_TISSUE_ADJACENT_TO_LIVER_TUMOR_UP;ATP_DEPENDENT_DNA_HELICASE_ACTIVITY;ATP_DEPENDENT_HELICASE_ACTIVITY;ATPASE_ACTIVITY;ATPASE_ACTIVITY_COUPLED;BASSO_CD40_SIGNALING_UP;BERENJENO_TRANSFORMED_BY_RHOA_FOREVER_DN;BERENJENO_TRANSFORMED_BY_RHOA_UP;BIOPOLYMER_METABOLIC_PROCESS;BLALOCK_ALZHEIMERS_DISEASE_UP;BOCHKIS_FOXA2_TARGETS;BROWNE_HCMV_INFECTION_16HR_UP;BYSTRYKH_HEMATOPOIESIS_STEM_CELL_…	3D-structure;Alternativesplicing;ATP-binding;Chromatinregulator;Completeproteome;Cytoplasm;DNA-binding;Helicase;Hydrolase;Nucleotide-binding;Nucleus;Phosphoprotein;Polymorphism;Referenceproteome;Repeat;Transcription;Transcriptionregulation
NaN	NaN	NaN	NaN	NaN	NaN	0.473514	NaN	NaN	0.888545	NaN	1.38025	1.38433	NaN	NaN	NaN	1.60219	0.467219	NaN	0.91689	NaN	1.05562	NaN	NaN	NaN	-0.0133044	NaN	0.754928	NaN	NaN	0.80852	NaN	0.458301	0.18192	1.1344	0.781724	-0.352672	0.20232	S	3	___1	anatomical structure development;biological regulation;biosynthetic process;cell differentiation;cellular biosynthetic process;cellular component organization;cellular component organization at cellular level;cellular component organization or biogenesis;cellular component organization or biogenesis at cellular level;cellular developmental process;cellular macromolecule biosynthetic process;cellu…	adenyl nucleotide binding;adenyl ribonucleotide binding;ATP binding;ATPase activity;ATPase activity, coupled;ATP-dependent DNA helicase activity;ATP-dependent helicase activity;binding;catalytic activity;core promoter binding;core promoter sequence-specific DNA binding;DNA binding;DNA helicase activity;DNA-dependent ATPase activity;helicase activity;histone binding;hydrolase activity;hydrolase ac…	cell part;extracellular membrane-bounded organelle;extracellular organelle;extracellular region part;extracellular vesicular exosome;intracellular membrane-bounded organelle;intracellular non-membrane-bounded organelle;intracellular organelle;intracellular organelle part;intracellular part;membrane-bounded organelle;membrane-bounded vesicle;non-membrane-bounded organelle;nuclear part;nucleolus;nu…	anatomical structure development;biological regulation;biosynthetic process;cell differentiation;cellular component organization;cellular metabolic process;cellular nitrogen compound metabolic process;cellular process;chromatin modification;chromatin organization;chromosome organization;developmental process;DNA geometric change;DNA metabolic process;macromolecule metabolic process;metabolic proc…	cell part;extracellular organelle;intracellular membrane-bounded organelle;intracellular non-membrane-bounded organelle;intracellular organelle;nucleolus;nucleoplasm;nucleus;organelle;vesicle		Chromo;DUF4208;Helicase_C;SNF2_N	AAANWWTGC_UNKNOWN;AACTTT_UNKNOWN;AMUNDSON_RESPONSE_TO_ARSENITE;ATP_DEPENDENT_DNA_HELICASE_ACTIVITY;ATP_DEPENDENT_HELICASE_ACTIVITY;ATPASE_ACTIVITY;ATPASE_ACTIVITY_COUPLED;BENPORATH_NANOG_TARGETS;BIOPOLYMER_METABOLIC_PROCESS;BLALOCK_ALZHEIMERS_DISEASE_INCIPIENT_UP;BLALOCK_ALZHEIMERS_DISEASE_UP;BRCA1_DN.V1_DN;BRUINS_UVC_RESPONSE_EARLY_LATE;CAGGTG_V$E12_Q6;CCAWYNNGAAR_UNKNOWN;CHARAFE_BREAST_CANCER_L…	Alternativesplicing;ATP-binding;Chromatinregulator;Completeproteome;Diseasemutation;DNA-binding;Epilepsy;Helicase;Hydrolase;Myogenesis;Nucleotide-binding;Nucleus;Phosphoprotein;Polymorphism;Referenceproteome;Repeat;Transcription;Transcriptionregulation
NaN	0.365643	0.0487828	NaN	0.410751	0.133089	0.874798	1.1211	NaN	0.938537	0.474169	0.717422	1.13805	1.29629	0.544904	NaN	NaN	0.860098	NaN	NaN	NaN	NaN	NaN	0.973691	0.377564	NaN	NaN	NaN	1.17506	NaN	0.427583	0.623748	0.688406	0.885624	0.717422	0.656077	-0.0613447	0.488448	S	3	___1	anatomical structure development;biological regulation;biosynthetic process;cell differentiation;cellular biosynthetic process;cellular component organization;cellular component organization at cellular level;cellular component organization or biogenesis;cellular component organization or biogenesis at cellular level;cellular developmental process;cellular macromolecule biosynthetic process;cellu…	adenyl nucleotide binding;adenyl ribonucleotide binding;ATP binding;ATPase activity;ATPase activity, coupled;ATP-dependent DNA helicase activity;ATP-dependent helicase activity;binding;catalytic activity;core promoter binding;core promoter sequence-specific DNA binding;DNA binding;DNA helicase activity;DNA-dependent ATPase activity;helicase activity;histone binding;hydrolase activity;hydrolase ac…	cell part;extracellular membrane-bounded organelle;extracellular organelle;extracellular region part;extracellular vesicular exosome;intracellular membrane-bounded organelle;intracellular non-membrane-bounded organelle;intracellular organelle;intracellular organelle part;intracellular part;membrane-bounded organelle;membrane-bounded vesicle;non-membrane-bounded organelle;nuclear part;nucleolus;nu…	anatomical structure development;biological regulation;biosynthetic process;cell differentiation;cellular component organization;cellular metabolic process;cellular nitrogen compound metabolic process;cellular process;chromatin modification;chromatin organization;chromosome organization;developmental process;DNA geometric change;DNA metabolic process;macromolecule metabolic process;metabolic proc…	cell part;extracellular organelle;intracellular membrane-bounded organelle;intracellular non-membrane-bounded organelle;intracellular organelle;nucleolus;nucleoplasm;nucleus;organelle;vesicle		Chromo;DUF4208;Helicase_C;SNF2_N	AAANWWTGC_UNKNOWN;AACTTT_UNKNOWN;AMUNDSON_RESPONSE_TO_ARSENITE;ATP_DEPENDENT_DNA_HELICASE_ACTIVITY;ATP_DEPENDENT_HELICASE_ACTIVITY;ATPASE_ACTIVITY;ATPASE_ACTIVITY_COUPLED;BENPORATH_NANOG_TARGETS;BIOPOLYMER_METABOLIC_PROCESS;BLALOCK_ALZHEIMERS_DISEASE_INCIPIENT_UP;BLALOCK_ALZHEIMERS_DISEASE_UP;BRCA1_DN.V1_DN;BRUINS_UVC_RESPONSE_EARLY_LATE;CAGGTG_V$E12_Q6;CCAWYNNGAAR_UNKNOWN;CHARAFE_BREAST_CANCER_L…	Alternativesplicing;ATP-binding;Chromatinregulator;Completeproteome;Diseasemutation;DNA-binding;Epilepsy;Helicase;Hydrolase;Myogenesis;Nucleotide-binding;Nucleus;Phosphoprotein;Polymorphism;Referenceproteome;Repeat;Transcription;Transcriptionregulation
-1.73986	0.393691	-0.63243	-0.387637	-0.433242	0.0138539	-3.1408	-1.53736	-2.09485	-2.25033	-0.898555	-1.14167	-3.29106	-1.33194	-0.412026	-2.96023	NaN	-3.50143	1.73806	-1.29144	-1.24679	-1.60146	-0.311421	-1.70561	0.204681	0.0896807	0.138286	-0.237394	-3.12648	1.1219	-1.2572	-0.871332	-1.09835	0.0547362	-1.33194	-0.871332	0.460609	0.0950475	S	2	___1	biological regulation;negative regulation of biological process;negative regulation of cell proliferation;negative regulation of cellular process;regulation of biological process;regulation of cell proliferation;regulation of cellular process;response to stimulus;response to stress		cell part;integral to membrane;intrinsic to membrane;membrane part	biological regulation;response to stimulus;response to stress	cell part		p53-inducible11	BILANGES_SERUM_SENSITIVE_GENES;CELL_PROLIFERATION_GO_0008283;CHIBA_RESPONSE_TO_TSA_UP;chr11p11;DOUGLAS_BMI1_TARGETS_UP;EIF4E_UP;GGGAGGRR_V$MAZ_Q6;GGGCGGR_V$SP1_Q6;GSE12845_IGD_POS_BLOOD_VS_PRE_GC_TONSIL_BCELL_UP;GSE12845_NAIVE_VS_PRE_GC_TONSIL_BCELL_UP;GSE13306_TREG_VS_TCONV_SPLEEN_UP;GSE14350_IL2RB_KO_VS_WT_TEFF_DN;GSE15324_ELF4_KO_VS_WT_ACTIVATED_CD8_TCELL_DN;GSE20366_EX_VIVO_VS_HOMEOSTATIC_CON…	Completeproteome;Membrane;Phosphoprotein;Referenceproteome;Transmembrane;Transmembranehelix
1.11809	NaN	1.65945	NaN	1.26817	NaN	2.05228	NaN	1.48846	0.251436	0.956958	1.01016	1.28638	NaN	1.03006	NaN	NaN	1.00099	1.3075	1.14053	NaN	NaN	0.992144	1.59456	NaN	NaN	NaN	NaN	NaN	0.896845	1.05275	NaN	NaN	0.869271	1.11809	1.09664	-0.021445	0.469969	S	2	___1	biological regulation;biosynthetic process;cell growth;cellular biosynthetic process;cellular component organization;cellular component organization at cellular level;cellular component organization or biogenesis;cellular component organization or biogenesis at cellular level;cellular macromolecule biosynthetic process;cellular macromolecule metabolic process;cellular metabolic process;cellular n…	binding;catalytic activity;cation binding;DNA binding;histone methyltransferase activity;histone methyltransferase activity (H3-K4 specific);histone-lysine N-methyltransferase activity;ion binding;lysine N-methyltransferase activity;metal ion binding;methyltransferase activity;N-methyltransferase activity;nucleic acid binding;protein methyltransferase activity;protein-lysine N-methyltransferase a…	cell part;histone methyltransferase complex;intracellular membrane-bounded organelle;intracellular organelle;intracellular organelle part;intracellular part;macromolecular complex;membrane-bounded organelle;methyltransferase complex;nuclear part;nucleoplasm;nucleoplasm part;nucleus;organelle;organelle part;protein complex	biological regulation;biosynthetic process;cell growth;cellular component organization;cellular metabolic process;cellular nitrogen compound metabolic process;cellular process;chromatin modification;chromatin organization;chromosome organization;developmental process;gene silencing;growth;histone modification;macromolecule metabolic process;macromolecule modification;metabolic process;multicellul…	cell part;histone methyltransferase complex;intracellular membrane-bounded organelle;intracellular organelle;macromolecular complex;nucleoplasm;nucleus;organelle;protein complex		FYRC;FYRN;PHD;SET		3D-structure;Acetylation;Alternativesplicing;Chromatinregulator;Coiledcoil;Completeproteome;Diseasemutation;Mentalretardation;Metal-binding;Methyltransferase;Nucleus;Phosphoprotein;Polymorphism;Referenceproteome;Repeat;S-adenosyl-L-methionine;Transcription;Transcriptionregulation;Transferase;Zinc;Zinc-finger
0.525517	NaN	-0.277924	NaN	0.324351	0.0343619	1.18953	NaN	0.422492	NaN	NaN	-0.094298	NaN	NaN	NaN	0.333931	NaN	0.214556	0.674837	NaN	1.4105	1.14541	-0.504898	0.62244	NaN	NaN	NaN	NaN	NaN	NaN	-0.493251	NaN	NaN	0.634405	0.324351	0.648638	0.324288	0.16826	S	3	___1	biological regulation;biosynthetic process;cell growth;cellular biosynthetic process;cellular component organization;cellular component organization at cellular level;cellular component organization or biogenesis;cellular component organization or biogenesis at cellular level;cellular macromolecule biosynthetic process;cellular macromolecule metabolic process;cellular metabolic process;cellular n…	binding;catalytic activity;cation binding;DNA binding;histone methyltransferase activity;histone methyltransferase activity (H3-K4 specific);histone-lysine N-methyltransferase activity;ion binding;lysine N-methyltransferase activity;metal ion binding;methyltransferase activity;N-methyltransferase activity;nucleic acid binding;protein methyltransferase activity;protein-lysine N-methyltransferase a…	cell part;histone methyltransferase complex;intracellular membrane-bounded organelle;intracellular organelle;intracellular organelle part;intracellular part;macromolecular complex;membrane-bounded organelle;methyltransferase complex;nuclear part;nucleoplasm;nucleoplasm part;nucleus;organelle;organelle part;protein complex	biological regulation;biosynthetic process;cell growth;cellular component organization;cellular metabolic process;cellular nitrogen compound metabolic process;cellular process;chromatin modification;chromatin organization;chromosome organization;developmental process;gene silencing;growth;histone modification;macromolecule metabolic process;macromolecule modification;metabolic process;multicellul…	cell part;histone methyltransferase complex;intracellular membrane-bounded organelle;intracellular organelle;macromolecular complex;nucleoplasm;nucleus;organelle;protein complex		FYRC;FYRN;PHD;SET		3D-structure;Acetylation;Alternativesplicing;Chromatinregulator;Coiledcoil;Completeproteome;Diseasemutation;Mentalretardation;Metal-binding;Methyltransferase;Nucleus;Phosphoprotein;Polymorphism;Referenceproteome;Repeat;S-adenosyl-L-methionine;Transcription;Transcriptionregulation;Transferase;Zinc;Zinc-finger
1.5492	0.845325	1.50664	NaN	0.978559	0.427012	2.38943	0.791252	NaN	0.516206	NaN	0.691047	1.07316	NaN	0.503546	2.10533	NaN	NaN	NaN	0.577098	1.18952	NaN	NaN	1.08903	1.53123	NaN	NaN	0.593506	NaN	NaN	NaN	NaN	NaN	0.656904	0.911942	1.08903	0.177083	0.279628	S	2	___1	biological regulation;biosynthetic process;cell growth;cellular biosynthetic process;cellular component organization;cellular component organization at cellular level;cellular component organization or biogenesis;cellular component organization or biogenesis at cellular level;cellular macromolecule biosynthetic process;cellular macromolecule metabolic process;cellular metabolic process;cellular n…	binding;catalytic activity;cation binding;DNA binding;histone methyltransferase activity;histone methyltransferase activity (H3-K4 specific);histone-lysine N-methyltransferase activity;ion binding;lysine N-methyltransferase activity;metal ion binding;methyltransferase activity;N-methyltransferase activity;nucleic acid binding;protein methyltransferase activity;protein-lysine N-methyltransferase a…	cell part;histone methyltransferase complex;intracellular membrane-bounded organelle;intracellular organelle;intracellular organelle part;intracellular part;macromolecular complex;membrane-bounded organelle;methyltransferase complex;nuclear part;nucleoplasm;nucleoplasm part;nucleus;organelle;organelle part;protein complex	biological regulation;biosynthetic process;cell growth;cellular component organization;cellular metabolic process;cellular nitrogen compound metabolic process;cellular process;chromatin modification;chromatin organization;chromosome organization;developmental process;gene silencing;growth;histone modification;macromolecule metabolic process;macromolecule modification;metabolic process;multicellul…	cell part;histone methyltransferase complex;intracellular membrane-bounded organelle;intracellular organelle;macromolecular complex;nucleoplasm;nucleus;organelle;protein complex		FYRC;FYRN;PHD;SET		3D-structure;Acetylation;Alternativesplicing;Chromatinregulator;Coiledcoil;Completeproteome;Diseasemutation;Mentalretardation;Metal-binding;Methyltransferase;Nucleus;Phosphoprotein;Polymorphism;Referenceproteome;Repeat;S-adenosyl-L-methionine;Transcription;Transcriptionregulation;Transferase;Zinc;Zinc-finger
1.74848	NaN	1.88412	NaN	0.384124	NaN	1.28006	NaN	NaN	NaN	0.798489	0.960877	1.93155	NaN	NaN	NaN	0.722376	NaN	0.219862	NaN	0.456034	0.245753	0.392365	NaN	1.69089	NaN	NaN	NaN	NaN	NaN	0.0827948	NaN	NaN	0.0507953	1.12047	0.319059	-0.801409	0.0191143	S	2	___1	biological regulation;biosynthetic process;cell growth;cellular biosynthetic process;cellular component organization;cellular component organization at cellular level;cellular component organization or biogenesis;cellular component organization or biogenesis at cellular level;cellular macromolecule biosynthetic process;cellular macromolecule metabolic process;cellular metabolic process;cellular n…	binding;catalytic activity;cation binding;DNA binding;histone methyltransferase activity;histone methyltransferase activity (H3-K4 specific);histone-lysine N-methyltransferase activity;ion binding;lysine N-methyltransferase activity;metal ion binding;methyltransferase activity;N-methyltransferase activity;nucleic acid binding;protein methyltransferase activity;protein-lysine N-methyltransferase a…	cell part;histone methyltransferase complex;intracellular membrane-bounded organelle;intracellular organelle;intracellular organelle part;intracellular part;macromolecular complex;membrane-bounded organelle;methyltransferase complex;nuclear part;nucleoplasm;nucleoplasm part;nucleus;organelle;organelle part;protein complex	biological regulation;biosynthetic process;cell growth;cellular component organization;cellular metabolic process;cellular nitrogen compound metabolic process;cellular process;chromatin modification;chromatin organization;chromosome organization;developmental process;gene silencing;growth;histone modification;macromolecule metabolic process;macromolecule modification;metabolic process;multicellul…	cell part;histone methyltransferase complex;intracellular membrane-bounded organelle;intracellular organelle;macromolecular complex;nucleoplasm;nucleus;organelle;protein complex		FYRC;FYRN;PHD;SET		3D-structure;Acetylation;Alternativesplicing;Chromatinregulator;Coiledcoil;Completeproteome;Diseasemutation;Mentalretardation;Metal-binding;Methyltransferase;Nucleus;Phosphoprotein;Polymorphism;Referenceproteome;Repeat;S-adenosyl-L-methionine;Transcription;Transcriptionregulation;Transferase;Zinc;Zinc-finger
0.775104	NaN	0.750743	0.0825668	NaN	0.329896	1.01727	0.83017	0.908969	0.183047	0.489306	0.373162	0.619491	0.778811	0.433729	1.24767	0.627061	0.443659	0.768074	0.686192	0.536953	0.946636	0.291956	1.07926	0.715132	0.421247	NaN	0.922174	0.483854	0.356045	0.581441	0.106551	0.159886	0.702578	0.623276	0.559197	-0.0640785	0.485438	S	2	___1	biological regulation;biosynthetic process;cell growth;cellular biosynthetic process;cellular component organization;cellular component organization at cellular level;cellular component organization or biogenesis;cellular component organization or biogenesis at cellular level;cellular macromolecule biosynthetic process;cellular macromolecule metabolic process;cellular metabolic process;cellular n…	binding;catalytic activity;cation binding;DNA binding;histone methyltransferase activity;histone methyltransferase activity (H3-K4 specific);histone-lysine N-methyltransferase activity;ion binding;lysine N-methyltransferase activity;metal ion binding;methyltransferase activity;N-methyltransferase activity;nucleic acid binding;protein methyltransferase activity;protein-lysine N-methyltransferase a…	cell part;histone methyltransferase complex;intracellular membrane-bounded organelle;intracellular organelle;intracellular organelle part;intracellular part;macromolecular complex;membrane-bounded organelle;methyltransferase complex;nuclear part;nucleoplasm;nucleoplasm part;nucleus;organelle;organelle part;protein complex	biological regulation;biosynthetic process;cell growth;cellular component organization;cellular metabolic process;cellular nitrogen compound metabolic process;cellular process;chromatin modification;chromatin organization;chromosome organization;developmental process;gene silencing;growth;histone modification;macromolecule metabolic process;macromolecule modification;metabolic process;multicellul…	cell part;histone methyltransferase complex;intracellular membrane-bounded organelle;intracellular organelle;macromolecular complex;nucleoplasm;nucleus;organelle;protein complex		FYRC;FYRN;PHD;SET		3D-structure;Acetylation;Alternativesplicing;Chromatinregulator;Coiledcoil;Completeproteome;Diseasemutation;Mentalretardation;Metal-binding;Methyltransferase;Nucleus;Phosphoprotein;Polymorphism;Referenceproteome;Repeat;S-adenosyl-L-methionine;Transcription;Transcriptionregulation;Transferase;Zinc;Zinc-finger
-1.58661	-0.830346	-1.15438	-1.05463	-1.57703	-0.967362	-0.7024	0.0878903	-1.63211	-1.4877	-1.17171	-1.64328	-1.71128	-1.36819	-0.756157	-2.09237	-0.998584	-1.19902	-0.322995	-0.375724	-1.10299	-1.31217	-1.22113	-1.58354	-0.778709	-1.05254	-0.876732	-0.399098	NaN	-0.730691	-1.70977	-0.308079	-1.11703	0.095382	-1.18536	-0.964638	0.220725	0.243292	S	2	___1	biological regulation;cellular process;cellular response to chemical stimulus;cellular response to endogenous stimulus;cellular response to growth factor stimulus;cellular response to organic substance;cellular response to stimulus;cellular response to transforming growth factor beta stimulus;negative regulation of biological process;negative regulation of cell proliferation;negative regulation o…	acetyltransferase activator activity;beta-tubulin binding;binding;carbohydrate binding;cytoskeletal protein binding;DNA binding;enzyme activator activity;enzyme regulator activity;glycosaminoglycan binding;heparin binding;nucleic acid binding;pattern binding;polysaccharide binding;protein binding;tubulin binding	cell part;cytoplasm;extracellular membrane-bounded organelle;extracellular organelle;extracellular region part;extracellular vesicular exosome;intracellular membrane-bounded organelle;intracellular organelle;intracellular part;membrane-bounded organelle;membrane-bounded vesicle;nucleus;organelle;vesicle	biological regulation;cellular process;regulation of organelle organization;response to chemical stimulus;response to endogenous stimulus;response to stimulus	cell part;cytoplasm;extracellular organelle;intracellular membrane-bounded organelle;intracellular organelle;nucleus;organelle;vesicle		dsDNA_bind	AACTTT_UNKNOWN;ACEVEDO_LIVER_TUMOR_VS_NORMAL_ADJACENT_TISSUE_UP;APOPTOSIS_GO;BENPORATH_PROLIFERATION;BLALOCK_ALZHEIMERS_DISEASE_DN;BONOME_OVARIAN_CANCER_SURVIVAL_SUBOPTIMAL_DEBULKING;CELL_DEVELOPMENT;chr19q12;DARWICHE_PAPILLOMA_RISK_HIGH_UP;DARWICHE_PAPILLOMA_RISK_LOW_UP;DARWICHE_SKIN_TUMOR_PROMOTER_UP;DARWICHE_SQUAMOUS_CELL_CARCINOMA_UP;DODD_NASOPHARYNGEAL_CARCINOMA_DN;FARMER_BREAST_CANCER_APOCR…	3D-structure;Acetylation;Alternativesplicing;Apoptosis;Completeproteome;Directproteinsequencing;Phosphoprotein;Referenceproteome
NaN	1.9017	NaN	0.983515	NaN	1.87659	NaN	NaN	NaN	0.960366	NaN	NaN	NaN	NaN	1.71164	NaN	NaN	NaN	NaN	1.28436	NaN	NaN	NaN	NaN	NaN	1.43727	NaN	1.05019	NaN	NaN	1.61274	NaN	1.27883	0.534032	1.71164	1.28436	-0.427285	0.149314	S	2	___1	acid secretion;actin cytoskeleton organization;actin filament-based process;activation of adenylate cyclase activity;activation of adenylate cyclase activity by dopamine receptor signaling pathway;activation of adenylate cyclase activity by G-protein signaling pathway;activation of phospholipase C activity;activation of phospholipase C activity by dopamine receptor signaling pathway;activation of…	adrenergic receptor binding;beta-2 adrenergic receptor binding;beta-catenin binding;binding;channel regulator activity;chloride channel regulator activity;enzyme binding;G-protein-coupled receptor binding;growth factor receptor binding;PDZ domain binding;phosphatase binding;protein binding;protein domain specific binding;protein self-association;receptor binding	actin cytoskeleton;apical plasma membrane;brush border membrane;cell part;cell periphery;cell projection;cell projection membrane;cell projection part;centrosome;cytoplasm;cytoplasmic part;cytoskeletal part;cytoskeleton;endomembrane system;extracellular membrane-bounded organelle;extracellular organelle;extracellular region part;extracellular vesicular exosome;filopodium;intracellular membrane-bo…	amine transport;amino acid transport;biological regulation;cellular component assembly;cellular component organization;cellular homeostasis;cellular ion homeostasis;cellular localization;cellular process;cytoskeleton organization;establishment of localization;homeostatic process;ion transport;localization;macromolecular complex assembly;multicellular organismal process;organelle organization;orga…	cell part;cell projection;centrosome;cytoplasm;cytoskeleton;endomembrane system;extracellular organelle;filopodium;intracellular membrane-bounded organelle;intracellular non-membrane-bounded organelle;intracellular organelle;membrane;microtubule organizing center;microvillus;organelle;plasma membrane;vesicle		EBP50_C-term;PDZ	ACTIN_CYTOSKELETON;ACTWSNACTNY_UNKNOWN;BHAT_ESR1_TARGETS_NOT_VIA_AKT1_UP;BHAT_ESR1_TARGETS_VIA_AKT1_UP;BILD_E2F3_ONCOGENIC_SIGNATURE;BIOCARTA_CFTR_PATHWAY;BLUM_RESPONSE_TO_SALIRASIB_DN;BROWNE_HCMV_INFECTION_16HR_UP;CAGGTG_V$E12_Q6;CELLULAR_COMPONENT_ASSEMBLY;CHARAFE_BREAST_CANCER_LUMINAL_VS_BASAL_UP;CHARAFE_BREAST_CANCER_LUMINAL_VS_MESENCHYMAL_UP;chr17q24;COULOUARN_TEMPORAL_TGFB1_SIGNATURE_DN;CYT…	3D-structure;Acetylation;Alternativesplicing;Cellmembrane;Cellprojection;Completeproteome;Cytoplasm;Directproteinsequencing;Diseasemutation;Membrane;Phosphoprotein;Polymorphism;Referenceproteome;Repeat;Wntsignalingpathway
NaN	1.48793	NaN	NaN	0.623766	1.07827	-0.15712	0.902762	0.57233	0.772104	1.00472	NaN	0.803218	1.34817	1.95039	NaN	NaN	0.214479	1.64952	0.402143	0.658269	0.368796	NaN	0.47669	1.22552	1.27328	NaN	0.25403	1.32449	0.377581	NaN	NaN	1.32042	0.876494	0.85299	0.658269	-0.194721	0.345597	S	2	___1	acid secretion;actin cytoskeleton organization;actin filament-based process;activation of adenylate cyclase activity;activation of adenylate cyclase activity by dopamine receptor signaling pathway;activation of adenylate cyclase activity by G-protein signaling pathway;activation of phospholipase C activity;activation of phospholipase C activity by dopamine receptor signaling pathway;activation of…	adrenergic receptor binding;beta-2 adrenergic receptor binding;beta-catenin binding;binding;channel regulator activity;chloride channel regulator activity;enzyme binding;G-protein-coupled receptor binding;growth factor receptor binding;PDZ domain binding;phosphatase binding;protein binding;protein domain specific binding;protein self-association;receptor binding	actin cytoskeleton;apical plasma membrane;brush border membrane;cell part;cell periphery;cell projection;cell projection membrane;cell projection part;centrosome;cytoplasm;cytoplasmic part;cytoskeletal part;cytoskeleton;endomembrane system;extracellular membrane-bounded organelle;extracellular organelle;extracellular region part;extracellular vesicular exosome;filopodium;intracellular membrane-bo…	amine transport;amino acid transport;biological regulation;cellular component assembly;cellular component organization;cellular homeostasis;cellular ion homeostasis;cellular localization;cellular process;cytoskeleton organization;establishment of localization;homeostatic process;ion transport;localization;macromolecular complex assembly;multicellular organismal process;organelle organization;orga…	cell part;cell projection;centrosome;cytoplasm;cytoskeleton;endomembrane system;extracellular organelle;filopodium;intracellular membrane-bounded organelle;intracellular non-membrane-bounded organelle;intracellular organelle;membrane;microtubule organizing center;microvillus;organelle;plasma membrane;vesicle		EBP50_C-term;PDZ	ACTIN_CYTOSKELETON;ACTWSNACTNY_UNKNOWN;BHAT_ESR1_TARGETS_NOT_VIA_AKT1_UP;BHAT_ESR1_TARGETS_VIA_AKT1_UP;BILD_E2F3_ONCOGENIC_SIGNATURE;BIOCARTA_CFTR_PATHWAY;BLUM_RESPONSE_TO_SALIRASIB_DN;BROWNE_HCMV_INFECTION_16HR_UP;CAGGTG_V$E12_Q6;CELLULAR_COMPONENT_ASSEMBLY;CHARAFE_BREAST_CANCER_LUMINAL_VS_BASAL_UP;CHARAFE_BREAST_CANCER_LUMINAL_VS_MESENCHYMAL_UP;chr17q24;COULOUARN_TEMPORAL_TGFB1_SIGNATURE_DN;CYT…	3D-structure;Acetylation;Alternativesplicing;Cellmembrane;Cellprojection;Completeproteome;Cytoplasm;Directproteinsequencing;Diseasemutation;Membrane;Phosphoprotein;Polymorphism;Referenceproteome;Repeat;Wntsignalingpathway
-0.110171	NaN	1.54762	0.234046	1.42168	1.65871	1.61463	NaN	NaN	0.561113	0.869288	-0.146902	0.679007	1.40152	NaN	0.926828	NaN	-0.810826	0.759405	-1.47469	0.550145	1.66315	0.766475	0.306044	1.3903	2.10212	0.527082	NaN	NaN	1.41869	0.757419	1.40521	0.821727	0.788522	0.869288	0.766475	-0.102814	0.442962	S	4	___1	cellular process;establishment of localization;establishment of localization in cell;establishment of protein localization;Golgi vesicle transport;intracellular transport;post-Golgi vesicle-mediated transport;protein transport;response to chemical stimulus;response to external stimulus;response to extracellular stimulus;response to nutrient;response to nutrient levels;response to retinoic acid;re…	binding;enzyme binding;protein binding;ubiquitin protein ligase binding	cell part;cytoplasmic part;extracellular membrane-bounded organelle;extracellular organelle;extracellular region part;extracellular vesicular exosome;Golgi apparatus part;Golgi membrane;integral to membrane;intracellular organelle part;intracellular part;intrinsic to membrane;membrane;membrane part;membrane-bounded organelle;membrane-bounded vesicle;organelle;organelle membrane;organelle part;ves…	cellular process;establishment of localization;Golgi vesicle transport;protein transport;response to chemical stimulus;response to external stimulus;response to extracellular stimulus;response to stimulus;transport;vesicle-mediated transport	cell part;extracellular organelle;membrane;organelle;vesicle		SCAMP	AACTGGA,MIR-145;ACEVEDO_LIVER_TUMOR_VS_NORMAL_ADJACENT_TISSUE_UP;ACTAYRNNNCCCR_UNKNOWN;ALCALA_APOPTOSIS;BENPORATH_MYC_MAX_TARGETS;BLALOCK_ALZHEIMERS_DISEASE_UP;BORCZUK_MALIGNANT_MESOTHELIOMA_UP;BOYAULT_LIVER_CANCER_SUBCLASS_G12_UP;CACGTG_V$MYC_Q2;CAGGTA_V$AREB6_01;CAGGTG_V$E12_Q6;CELLULAR_LOCALIZATION;CHIANG_LIVER_CANCER_SUBCLASS_UNANNOTATED_DN;chr1q21;CTTTGA_V$LEF1_Q2;CTTTGT_V$LEF1_Q2;DANG_BOUND…	Alternativesplicing;Completeproteome;Membrane;Phosphoprotein;Polymorphism;Proteintransport;Referenceproteome;Transmembrane;Transmembranehelix;Transport;Ublconjugation
-0.0415319	-1.44951	-1.26911	-0.884616	-1.60255	-1.82393	0.431314	-0.886538	NaN	-1.88691	-1.3514	NaN	-0.930479	-1.11785	-1.81161	-0.994836	NaN	-0.42489	0.229707	-0.351664	-0.382353	-1.60789	-0.593198	-1.4938	-1.28014	-1.68262	-1.85292	-0.197116	-1.02378	NaN	NaN	-0.688261	-0.987072	0.541579	-1.11785	-0.987072	0.130775	0.320854	S	2	___1	cellular process;establishment of localization;establishment of localization in cell;establishment of protein localization;Golgi vesicle transport;intracellular transport;post-Golgi vesicle-mediated transport;protein transport;response to chemical stimulus;response to external stimulus;response to extracellular stimulus;response to nutrient;response to nutrient levels;response to retinoic acid;re…	binding;enzyme binding;protein binding;ubiquitin protein ligase binding	cell part;cytoplasmic part;extracellular membrane-bounded organelle;extracellular organelle;extracellular region part;extracellular vesicular exosome;Golgi apparatus part;Golgi membrane;integral to membrane;intracellular organelle part;intracellular part;intrinsic to membrane;membrane;membrane part;membrane-bounded organelle;membrane-bounded vesicle;organelle;organelle membrane;organelle part;ves…	cellular process;establishment of localization;Golgi vesicle transport;protein transport;response to chemical stimulus;response to external stimulus;response to extracellular stimulus;response to stimulus;transport;vesicle-mediated transport	cell part;extracellular organelle;membrane;organelle;vesicle		SCAMP	AACTGGA,MIR-145;ACEVEDO_LIVER_TUMOR_VS_NORMAL_ADJACENT_TISSUE_UP;ACTAYRNNNCCCR_UNKNOWN;ALCALA_APOPTOSIS;BENPORATH_MYC_MAX_TARGETS;BLALOCK_ALZHEIMERS_DISEASE_UP;BORCZUK_MALIGNANT_MESOTHELIOMA_UP;BOYAULT_LIVER_CANCER_SUBCLASS_G12_UP;CACGTG_V$MYC_Q2;CAGGTA_V$AREB6_01;CAGGTG_V$E12_Q6;CELLULAR_LOCALIZATION;CHIANG_LIVER_CANCER_SUBCLASS_UNANNOTATED_DN;chr1q21;CTTTGA_V$LEF1_Q2;CTTTGT_V$LEF1_Q2;DANG_BOUND…	Alternativesplicing;Completeproteome;Membrane;Phosphoprotein;Polymorphism;Proteintransport;Referenceproteome;Transmembrane;Transmembranehelix;Transport;Ublconjugation
NaN	-2.40714	-0.879436	0.109523	0.375484	NaN	NaN	-0.789247	NaN	-0.59561	-1.32777	-0.825367	-0.529582	NaN	NaN	-0.607202	NaN	-1.14765	-1.37094	-0.897543	NaN	NaN	-0.314784	-0.78718	0.030783	-0.336314	-0.945788	-1.56638	NaN	-1.55827	-0.634296	NaN	-0.509561	0.929973	-0.789247	-0.78718	0.00206721	0.446076	S	2	___1	amine catabolic process;amine metabolic process;branched chain family amino acid catabolic process;branched chain family amino acid metabolic process;carboxylic acid catabolic process;carboxylic acid metabolic process;catabolic process;cellular amine metabolic process;cellular amino acid catabolic process;cellular amino acid metabolic process;cellular catabolic process;cellular ketone metabolic p…	[3-methyl-2-oxobutanoate dehydrogenase (acetyl-transferring)] kinase activity;adenyl nucleotide binding;adenyl ribonucleotide binding;ATP binding;binding;catalytic activity;kinase activity;nucleotide binding;phosphotransferase activity, alcohol group as acceptor;protein kinase activity;protein serine/threonine kinase activity;purine nucleotide binding;purine ribonucleoside triphosphate binding;pu…	cell part;cytoplasmic part;dihydrolipoyl dehydrogenase complex;intracellular membrane-bounded organelle;intracellular organelle;intracellular organelle part;intracellular part;macromolecular complex;membrane-bounded organelle;mitochondrial alpha-ketoglutarate dehydrogenase complex;mitochondrial part;mitochondrial tricarboxylic acid cycle enzyme complex;mitochondrion;organelle;organelle part;prote…	amine metabolic process;catabolic process;cellular amino acid metabolic process;cellular ketone metabolic process;cellular metabolic process;cellular nitrogen compound metabolic process;cellular process;macromolecule metabolic process;macromolecule modification;metabolic process;nitrogen compound metabolic process;organic acid metabolic process;phosphorus metabolic process;primary metabolic proce…	cell part;intracellular membrane-bounded organelle;intracellular organelle;macromolecular complex;mitochondrion;organelle;protein complex;tricarboxylic acid cycle enzyme complex		BCDHK_Adom3;HATPase_c	AACWWCAANK_UNKNOWN;ACEVEDO_LIVER_CANCER_DN;ACTAYRNNNCCCR_UNKNOWN;ACTWSNACTNY_UNKNOWN;ADENYL_NUCLEOTIDE_BINDING;ADENYL_RIBONUCLEOTIDE_BINDING;AGGGCAG,MIR-18A;AMINE_CATABOLIC_PROCESS;AMINE_METABOLIC_PROCESS;AMINO_ACID_AND_DERIVATIVE_METABOLIC_PROCESS;AMINO_ACID_CATABOLIC_PROCESS;AMINO_ACID_METABOLIC_PROCESS;ATP_BINDING;BROWNE_HCMV_INFECTION_1HR_DN;BROWNE_HCMV_INFECTION_48HR_DN;CARBOXYLIC_ACID_METAB…	Acetylation;Alternativesplicing;ATP-binding;Completeproteome;Diseasemutation;Kinase;Mitochondrion;Nucleotide-binding;Phosphoprotein;Referenceproteome;Transferase;Transitpeptide
-2.19269	-1.86182	-1.50622	-3.9573	-2.46762	-2.59434	-2.59018	-1.67793	-4.13878	-4.17102	-2.30178	-2.37519	-2.97555	-2.32592	-2.38454	-2.32525	-1.79798	-3.34402	-0.823086	-1.60123	-3.47184	-2.63998	-2.25158	-3.26137	-1.52193	-2.72246	NaN	-0.495241	-2.61052	-3.04361	-2.15701	-2.23227	-2.84083	0.260497	-2.37987	-2.43105	-0.0511819	0.499641	S	2	___1	biological regulation;cellular component assembly;cellular component assembly at cellular level;cellular component organization;cellular component organization at cellular level;cellular component organization or biogenesis;cellular component organization or biogenesis at cellular level;cellular macromolecular complex assembly;cellular macromolecular complex subunit organization;cellular macromol…	acetyltransferase activity;catalytic activity;H4 histone acetyltransferase activity;histone acetyltransferase activity;lysine N-acetyltransferase activity;N-acetyltransferase activity;N-acyltransferase activity;transferase activity;transferase activity, transferring acyl groups;transferase activity, transferring acyl groups other than amino-acyl groups	cell part;chromatin;chromosomal part;cytoplasm;intracellular membrane-bounded organelle;intracellular organelle;intracellular organelle part;intracellular part;macromolecular complex;membrane-bounded organelle;nuclear chromatin;nuclear chromosome part;nuclear matrix;nuclear part;nucleoplasm;nucleus;organelle;organelle part;protein complex	biological regulation;cellular component assembly;cellular component organization;cellular macromolecular complex assembly;cellular metabolic process;cellular nitrogen compound metabolic process;cellular process;chromatin modification;chromatin organization;chromosome organization;DNA metabolic process;DNA packaging;gene silencing;histone modification;macromolecular complex assembly;macromolecule…	cell part;cytoplasm;intracellular membrane-bounded organelle;intracellular organelle;macromolecular complex;nucleoplasm;nucleus;organelle;protein complex		Hat1_N	AACTTT_UNKNOWN;ACETYLTRANSFERASE_ACTIVITY;ACEVEDO_LIVER_CANCER_WITH_H3K9ME3_DN;ATACTGT,MIR-144;BASAKI_YBX1_TARGETS_UP;BERENJENO_TRANSFORMED_BY_RHOA_UP;BIOPOLYMER_METABOLIC_PROCESS;BIOPOLYMER_MODIFICATION;BOYAULT_LIVER_CANCER_SUBCLASS_G123_UP;BROWNE_HCMV_INFECTION_48HR_UP;BRUINS_UVC_RESPONSE_LATE;BURTON_ADIPOGENESIS_PEAK_AT_16HR;BYSTRYKH_HEMATOPOIESIS_STEM_CELL_QTL_TRANS;CELLULAR_MACROMOLECULE_MET…	3D-structure;Acetylation;Acyltransferase;Alternativesplicing;Completeproteome;Cytoplasm;Nucleus;Polymorphism;Referenceproteome;Transferase
-0.448577	2.34585	2.04408	NaN	1.2757	1.81634	NaN	1.26282	1.16534	1.02497	1.67459	1.01945	0.0469182	2.78501	0.86293	0.200008	0.685639	0.204269	1.81082	2.34916	0.89212	0.652786	NaN	0.636739	0.869196	1.70424	NaN	1.4762	2.84614	0.640654	1.21563	3.12336	2.51235	0.162195	1.09516	1.4762	0.381048	0.134261	S	3	___1	axon guidance;biological adhesion;biological regulation;cell adhesion;cell surface receptor linked signaling pathway;cell-cell adhesion;cellular process;cellular response to stimulus;chemotaxis;enzyme linked receptor protein signaling pathway;ephrin receptor signaling pathway;establishment of localization;establishment of localization in cell;establishment of protein localization;establishment of…	binding;calcium ion binding;cation binding;ion binding;metal ion binding;structural constituent of muscle;structural molecule activity	actin filament bundle;actomyosin;apical part of cell;cell part;contractile fiber part;cytoplasmic part;cytoskeletal part;cytosol;extracellular membrane-bounded organelle;extracellular organelle;extracellular region part;extracellular vesicular exosome;intracellular organelle part;intracellular part;macromolecular complex;membrane-bounded organelle;membrane-bounded vesicle;muscle myosin complex;my…	biological adhesion;biological regulation;cell adhesion;cellular process;establishment of localization;locomotion;multicellular organismal process;muscle contraction;protein targeting;protein transport;response to chemical stimulus;response to external stimulus;response to stimulus;signal transduction;transport	apical part of cell;cell part;cytosol;extracellular organelle;macromolecular complex;organelle;protein complex;vesicle	Focal adhesion;Leukocyte transendothelial migration;Regulation of actin cytoskeleton;Tight junction;Vascular smooth muscle contraction	EF-hand_1;EF-hand_7	AACTTT_UNKNOWN;ACEVEDO_FGFR1_TARGETS_IN_PROSTATE_CANCER_MODEL_DN;ACTIN_CYTOSKELETON;ALFANO_MYC_TARGETS;BAELDE_DIABETIC_NEPHROPATHY_DN;BASSO_B_LYMPHOCYTE_NETWORK;BCAT_BILD_ET_AL_UP;BERENJENO_TRANSFORMED_BY_RHOA_DN;BERTUCCI_MEDULLARY_VS_DUCTAL_BREAST_CANCER_DN;BLALOCK_ALZHEIMERS_DISEASE_DN;BONOME_OVARIAN_CANCER_SURVIVAL_OPTIMAL_DEBULKING;BOYLAN_MULTIPLE_MYELOMA_PCA3_DN;BROWNE_HCMV_INFECTION_48HR_DN…	Acetylation;Alternativesplicing;Calcium;Completeproteome;Metal-binding;Motorprotein;Muscleprotein;Myosin;Phosphoprotein;Polymorphism;Referenceproteome;Repeat
NaN	NaN	NaN	NaN	NaN	NaN	NaN	NaN	NaN	NaN	-0.305662	0.0406158	NaN	-0.574178	NaN	-2.33929	NaN	1.1522	0.961845	0.198931	NaN	NaN	0.482583	NaN	NaN	NaN	0.738662	-0.678218	NaN	0.955809	-2.27803	NaN	0.0476771	0.522187	-0.305662	0.340757	0.646418	0.0370241	S	3	___1	biological regulation;cell cycle;cell cycle phase;cell cycle process;cellular component organization;cellular component organization at cellular level;cellular component organization or biogenesis;cellular component organization or biogenesis at cellular level;cellular macromolecule metabolic process;cellular metabolic process;cellular process;cellular protein metabolic process;cellular response …	14-3-3 protein binding;binding;enzyme binding;enzyme inhibitor activity;enzyme regulator activity;kinase binding;molecular transducer activity;phosphatase regulator activity;protein binding;protein kinase binding;signal transducer activity	actin cytoskeleton;adherens junction;anchoring junction;cell junction;cell part;cell-substrate adherens junction;cell-substrate junction;centrosome;chromosomal part;contractile fiber;cytoplasm;cytoplasmic part;cytoskeletal part;cytoskeleton;cytosol;focal adhesion;intracellular non-membrane-bounded organelle;intracellular organelle;intracellular organelle part;intracellular part;kinetochore;macrom…	biological regulation;cell cycle;cellular component organization;cellular metabolic process;cellular process;macromolecule metabolic process;macromolecule modification;metabolic process;microtubule organizing center organization;mitosis;mitotic cell cycle;nuclear division;organelle fission;organelle organization;phosphorus metabolic process;primary metabolic process;protein dephosphorylation;prot…	cell part;centrosome;cytoplasm;cytoskeleton;cytosol;intracellular non-membrane-bounded organelle;intracellular organelle;kinetochore;macromolecular complex;microtubule organizing center;nucleoplasm;organelle;protein complex;protein serine/threonine phosphatase complex	Focal adhesion;Long-term potentiation;Regulation of actin cytoskeleton;Vascular smooth muscle contraction	Ank	AACTTT_UNKNOWN;AATGTGA,MIR-23A,MIR-23B;AGUIRRE_PANCREATIC_CANCER_COPY_NUMBER_DN;ATGTTAA,MIR-302C;BENPORATH_MYC_MAX_TARGETS;BLALOCK_ALZHEIMERS_DISEASE_DN;BRUINS_UVC_RESPONSE_LATE;CAGTCAC,MIR-134;CATTTCA,MIR-203;CCAWWNAAGG_V$SRF_Q4;CHEN_HOXA5_TARGETS_9HR_UP;chr12q15;CTACTGT,MIR-199A;CTTTGT_V$LEF1_Q2;DACOSTA_UV_RESPONSE_VIA_ERCC3_COMMON_DN;DACOSTA_UV_RESPONSE_VIA_ERCC3_DN;DANG_BOUND_BY_MYC;DAZARD_RE…	3D-structure;Alternativesplicing;ANKrepeat;Completeproteome;Cytoplasm;Directproteinsequencing;Hydroxylation;Phosphoprotein;Polymorphism;Referenceproteome;Repeat
-0.406318	1.49031	0.888645	1.76606	0.790353	1.76016	NaN	0.70948	0.459242	1.0534	1.1838	0.686732	1.17957	2.83892	1.69421	-1.38	-0.675694	1.3467	2.38694	1.30662	0.0364445	NaN	0.702333	-0.00720414	0.871577	1.40922	1.48257	1.23805	1.50899	1.90506	1.22237	2.22738	1.59277	0.237542	1.0534	1.35792	0.30452	0.1813	S	2	___1	biological regulation;cell cycle;cell cycle phase;cell cycle process;cellular component organization;cellular component organization at cellular level;cellular component organization or biogenesis;cellular component organization or biogenesis at cellular level;cellular macromolecule metabolic process;cellular metabolic process;cellular process;cellular protein metabolic process;cellular response …	14-3-3 protein binding;binding;enzyme binding;enzyme inhibitor activity;enzyme regulator activity;kinase binding;molecular transducer activity;phosphatase regulator activity;protein binding;protein kinase binding;signal transducer activity	actin cytoskeleton;adherens junction;anchoring junction;cell junction;cell part;cell-substrate adherens junction;cell-substrate junction;centrosome;chromosomal part;contractile fiber;cytoplasm;cytoplasmic part;cytoskeletal part;cytoskeleton;cytosol;focal adhesion;intracellular non-membrane-bounded organelle;intracellular organelle;intracellular organelle part;intracellular part;kinetochore;macrom…	biological regulation;cell cycle;cellular component organization;cellular metabolic process;cellular process;macromolecule metabolic process;macromolecule modification;metabolic process;microtubule organizing center organization;mitosis;mitotic cell cycle;nuclear division;organelle fission;organelle organization;phosphorus metabolic process;primary metabolic process;protein dephosphorylation;prot…	cell part;centrosome;cytoplasm;cytoskeleton;cytosol;intracellular non-membrane-bounded organelle;intracellular organelle;kinetochore;macromolecular complex;microtubule organizing center;nucleoplasm;organelle;protein complex;protein serine/threonine phosphatase complex	Focal adhesion;Long-term potentiation;Regulation of actin cytoskeleton;Vascular smooth muscle contraction	Ank	AACTTT_UNKNOWN;AATGTGA,MIR-23A,MIR-23B;AGUIRRE_PANCREATIC_CANCER_COPY_NUMBER_DN;ATGTTAA,MIR-302C;BENPORATH_MYC_MAX_TARGETS;BLALOCK_ALZHEIMERS_DISEASE_DN;BRUINS_UVC_RESPONSE_LATE;CAGTCAC,MIR-134;CATTTCA,MIR-203;CCAWWNAAGG_V$SRF_Q4;CHEN_HOXA5_TARGETS_9HR_UP;chr12q15;CTACTGT,MIR-199A;CTTTGT_V$LEF1_Q2;DACOSTA_UV_RESPONSE_VIA_ERCC3_COMMON_DN;DACOSTA_UV_RESPONSE_VIA_ERCC3_DN;DANG_BOUND_BY_MYC;DAZARD_RE…	3D-structure;Alternativesplicing;ANKrepeat;Completeproteome;Cytoplasm;Directproteinsequencing;Hydroxylation;Phosphoprotein;Polymorphism;Referenceproteome;Repeat
NaN	NaN	0.736425	1.21324	1.02842	1.76605	NaN	NaN	0.43926	0.191476	NaN	NaN	0.61054	NaN	NaN	NaN	NaN	1.74916	NaN	0.720436	NaN	NaN	-1.70171	NaN	1.03068	NaN	0.624509	NaN	NaN	1.12797	NaN	NaN	2.08673	0.584912	0.88242	0.875559	-0.00686124	0.455131	S	3	___1	biological regulation;cell cycle;cell cycle phase;cell cycle process;cellular component organization;cellular component organization at cellular level;cellular component organization or biogenesis;cellular component organization or biogenesis at cellular level;cellular macromolecule metabolic process;cellular metabolic process;cellular process;cellular protein metabolic process;cellular response …	14-3-3 protein binding;binding;enzyme binding;enzyme inhibitor activity;enzyme regulator activity;kinase binding;molecular transducer activity;phosphatase regulator activity;protein binding;protein kinase binding;signal transducer activity	actin cytoskeleton;adherens junction;anchoring junction;cell junction;cell part;cell-substrate adherens junction;cell-substrate junction;centrosome;chromosomal part;contractile fiber;cytoplasm;cytoplasmic part;cytoskeletal part;cytoskeleton;cytosol;focal adhesion;intracellular non-membrane-bounded organelle;intracellular organelle;intracellular organelle part;intracellular part;kinetochore;macrom…	biological regulation;cell cycle;cellular component organization;cellular metabolic process;cellular process;macromolecule metabolic process;macromolecule modification;metabolic process;microtubule organizing center organization;mitosis;mitotic cell cycle;nuclear division;organelle fission;organelle organization;phosphorus metabolic process;primary metabolic process;protein dephosphorylation;prot…	cell part;centrosome;cytoplasm;cytoskeleton;cytosol;intracellular non-membrane-bounded organelle;intracellular organelle;kinetochore;macromolecular complex;microtubule organizing center;nucleoplasm;organelle;protein complex;protein serine/threonine phosphatase complex	Focal adhesion;Long-term potentiation;Regulation of actin cytoskeleton;Vascular smooth muscle contraction	Ank	AACTTT_UNKNOWN;AATGTGA,MIR-23A,MIR-23B;AGUIRRE_PANCREATIC_CANCER_COPY_NUMBER_DN;ATGTTAA,MIR-302C;BENPORATH_MYC_MAX_TARGETS;BLALOCK_ALZHEIMERS_DISEASE_DN;BRUINS_UVC_RESPONSE_LATE;CAGTCAC,MIR-134;CATTTCA,MIR-203;CCAWWNAAGG_V$SRF_Q4;CHEN_HOXA5_TARGETS_9HR_UP;chr12q15;CTACTGT,MIR-199A;CTTTGT_V$LEF1_Q2;DACOSTA_UV_RESPONSE_VIA_ERCC3_COMMON_DN;DACOSTA_UV_RESPONSE_VIA_ERCC3_DN;DANG_BOUND_BY_MYC;DAZARD_RE…	3D-structure;Alternativesplicing;ANKrepeat;Completeproteome;Cytoplasm;Directproteinsequencing;Hydroxylation;Phosphoprotein;Polymorphism;Referenceproteome;Repeat
NaN	2.23983	NaN	NaN	NaN	0.901626	NaN	NaN	NaN	NaN	NaN	0.783388	NaN	3.27611	2.46901	NaN	NaN	1.75247	-0.728818	1.35213	NaN	NaN	NaN	1.29942	2.2035	1.94034	NaN	1.39248	3.21474	2.48487	1.17085	NaN	2.99185	0.751392	1.99615	1.66641	-0.32974	0.220637	S	2	___1	biological regulation;cell cycle;cell cycle phase;cell cycle process;cellular component organization;cellular component organization at cellular level;cellular component organization or biogenesis;cellular component organization or biogenesis at cellular level;cellular macromolecule metabolic process;cellular metabolic process;cellular process;cellular protein metabolic process;cellular response …	14-3-3 protein binding;binding;enzyme binding;enzyme inhibitor activity;enzyme regulator activity;kinase binding;molecular transducer activity;phosphatase regulator activity;protein binding;protein kinase binding;signal transducer activity	actin cytoskeleton;adherens junction;anchoring junction;cell junction;cell part;cell-substrate adherens junction;cell-substrate junction;centrosome;chromosomal part;contractile fiber;cytoplasm;cytoplasmic part;cytoskeletal part;cytoskeleton;cytosol;focal adhesion;intracellular non-membrane-bounded organelle;intracellular organelle;intracellular organelle part;intracellular part;kinetochore;macrom…	biological regulation;cell cycle;cellular component organization;cellular metabolic process;cellular process;macromolecule metabolic process;macromolecule modification;metabolic process;microtubule organizing center organization;mitosis;mitotic cell cycle;nuclear division;organelle fission;organelle organization;phosphorus metabolic process;primary metabolic process;protein dephosphorylation;prot…	cell part;centrosome;cytoplasm;cytoskeleton;cytosol;intracellular non-membrane-bounded organelle;intracellular organelle;kinetochore;macromolecular complex;microtubule organizing center;nucleoplasm;organelle;protein complex;protein serine/threonine phosphatase complex	Focal adhesion;Long-term potentiation;Regulation of actin cytoskeleton;Vascular smooth muscle contraction	Ank	AACTTT_UNKNOWN;AATGTGA,MIR-23A,MIR-23B;AGUIRRE_PANCREATIC_CANCER_COPY_NUMBER_DN;ATGTTAA,MIR-302C;BENPORATH_MYC_MAX_TARGETS;BLALOCK_ALZHEIMERS_DISEASE_DN;BRUINS_UVC_RESPONSE_LATE;CAGTCAC,MIR-134;CATTTCA,MIR-203;CCAWWNAAGG_V$SRF_Q4;CHEN_HOXA5_TARGETS_9HR_UP;chr12q15;CTACTGT,MIR-199A;CTTTGT_V$LEF1_Q2;DACOSTA_UV_RESPONSE_VIA_ERCC3_COMMON_DN;DACOSTA_UV_RESPONSE_VIA_ERCC3_DN;DANG_BOUND_BY_MYC;DAZARD_RE…	3D-structure;Alternativesplicing;ANKrepeat;Completeproteome;Cytoplasm;Directproteinsequencing;Hydroxylation;Phosphoprotein;Polymorphism;Referenceproteome;Repeat
-0.115398	1.30611	0.735378	0.682508	0.0344298	0.847575	NaN	1.13299	0.322376	0.527189	0.966223	1.98354	1.7892	NaN	1.6361	NaN	NaN	0.921193	1.84652	0.578924	0.269934	NaN	0.831337	0.813717	1.4525	1.52667	1.63524	0.858733	2.19142	1.42876	0.591837	NaN	1.95654	0.191976	0.884384	1.42876	0.544373	0.0636433	S	2	___1	biological regulation;cell cycle;cell cycle phase;cell cycle process;cellular component organization;cellular component organization at cellular level;cellular component organization or biogenesis;cellular component organization or biogenesis at cellular level;cellular macromolecule metabolic process;cellular metabolic process;cellular process;cellular protein metabolic process;cellular response …	14-3-3 protein binding;binding;enzyme binding;enzyme inhibitor activity;enzyme regulator activity;kinase binding;molecular transducer activity;phosphatase regulator activity;protein binding;protein kinase binding;signal transducer activity	actin cytoskeleton;adherens junction;anchoring junction;cell junction;cell part;cell-substrate adherens junction;cell-substrate junction;centrosome;chromosomal part;contractile fiber;cytoplasm;cytoplasmic part;cytoskeletal part;cytoskeleton;cytosol;focal adhesion;intracellular non-membrane-bounded organelle;intracellular organelle;intracellular organelle part;intracellular part;kinetochore;macrom…	biological regulation;cell cycle;cellular component organization;cellular metabolic process;cellular process;macromolecule metabolic process;macromolecule modification;metabolic process;microtubule organizing center organization;mitosis;mitotic cell cycle;nuclear division;organelle fission;organelle organization;phosphorus metabolic process;primary metabolic process;protein dephosphorylation;prot…	cell part;centrosome;cytoplasm;cytoskeleton;cytosol;intracellular non-membrane-bounded organelle;intracellular organelle;kinetochore;macromolecular complex;microtubule organizing center;nucleoplasm;organelle;protein complex;protein serine/threonine phosphatase complex	Focal adhesion;Long-term potentiation;Regulation of actin cytoskeleton;Vascular smooth muscle contraction	Ank	AACTTT_UNKNOWN;AATGTGA,MIR-23A,MIR-23B;AGUIRRE_PANCREATIC_CANCER_COPY_NUMBER_DN;ATGTTAA,MIR-302C;BENPORATH_MYC_MAX_TARGETS;BLALOCK_ALZHEIMERS_DISEASE_DN;BRUINS_UVC_RESPONSE_LATE;CAGTCAC,MIR-134;CATTTCA,MIR-203;CCAWWNAAGG_V$SRF_Q4;CHEN_HOXA5_TARGETS_9HR_UP;chr12q15;CTACTGT,MIR-199A;CTTTGT_V$LEF1_Q2;DACOSTA_UV_RESPONSE_VIA_ERCC3_COMMON_DN;DACOSTA_UV_RESPONSE_VIA_ERCC3_DN;DANG_BOUND_BY_MYC;DAZARD_RE…	3D-structure;Alternativesplicing;ANKrepeat;Completeproteome;Cytoplasm;Directproteinsequencing;Hydroxylation;Phosphoprotein;Polymorphism;Referenceproteome;Repeat
1.54984	0.355263	1.85221	NaN	1.69072	1.19391	1.92531	0.889596	1.76284	1.41078	NaN	1.65769	1.52506	1.08006	0.297618	1.06383	1.03279	2.04645	0.15451	-0.0703723	NaN	1.70505	0.590165	2.03681	1.53622	0.729071	NaN	NaN	0.959573	NaN	-0.178567	1.39445	0.215659	0.07157	1.46792	0.729071	-0.738845	0.0287398	S	2	___1		binding;cation binding;ion binding;metal ion binding	cell part;intracellular membrane-bounded organelle;intracellular organelle;intracellular part;membrane-bounded organelle;nucleus;organelle		cell part;intracellular membrane-bounded organelle;intracellular organelle;nucleus;organelle			AAGCACA,MIR-218;AGTCAGC,MIR-345;ATGAAGG,MIR-205;CACCAGC,MIR-138;CAGTGTT,MIR-141,MIR-200A;CCAGGGG,MIR-331;CCCAGAG,MIR-326;CCTGCTG,MIR-214;chr15q22;CTATGCA,MIR-153;CTTTGTA,MIR-524;GACAATC,MIR-219;GAGCTGG,MIR-337;GCAAAAA,MIR-129;GGCAGAC,MIR-346;GGCAGCT,MIR-22;GSE18791_UNSTIM_VS_NEWCATSLE_VIRUS_DC_6H_UP;GSE22886_NAIVE_CD4_TCELL_VS_48H_ACT_TH1_UP;GSE22886_NAIVE_CD4_TCELL_VS_48H_ACT_TH2_UP;GSE25087_TRE…	Completeproteome;Metal-binding;Nucleus;Phosphoprotein;Referenceproteome;Zinc;Zinc-finger
NaN	0.893435	1.34866	NaN	0.624863	0.498114	1.01477	0.282693	1.06519	0.31271	0.428322	1.74846	1.48153	0.848749	0.55084	0.680259	0.518445	1.73538	-0.0239885	0.450485	0.921409	1.44393	0.431223	1.16593	0.939966	0.267555	0.0618046	0.718202	NaN	-1.01483	NaN	NaN	0.290921	0.083263	0.764504	0.440854	-0.32365	0.225656	S	2	___1		binding;cation binding;ion binding;metal ion binding	cell part;intracellular membrane-bounded organelle;intracellular organelle;intracellular part;membrane-bounded organelle;nucleus;organelle		cell part;intracellular membrane-bounded organelle;intracellular organelle;nucleus;organelle			AAGCACA,MIR-218;AGTCAGC,MIR-345;ATGAAGG,MIR-205;CACCAGC,MIR-138;CAGTGTT,MIR-141,MIR-200A;CCAGGGG,MIR-331;CCCAGAG,MIR-326;CCTGCTG,MIR-214;chr15q22;CTATGCA,MIR-153;CTTTGTA,MIR-524;GACAATC,MIR-219;GAGCTGG,MIR-337;GCAAAAA,MIR-129;GGCAGAC,MIR-346;GGCAGCT,MIR-22;GSE18791_UNSTIM_VS_NEWCATSLE_VIRUS_DC_6H_UP;GSE22886_NAIVE_CD4_TCELL_VS_48H_ACT_TH1_UP;GSE22886_NAIVE_CD4_TCELL_VS_48H_ACT_TH2_UP;GSE25087_TRE…	Completeproteome;Metal-binding;Nucleus;Phosphoprotein;Referenceproteome;Zinc;Zinc-finger
1.5781	1.44369	2.93244	0.795394	1.38904	1.06877	0.958779	1.49562	2.2367	1.3648	1.70213	2.26826	2.21323	1.38193	1.05739	0.979319	0.874277	2.57703	0.702067	0.861398	NaN	1.87445	1.64626	1.46685	0.913298	0.628149	NaN	NaN	1.45345	-0.537426	0.124645	NaN	NaN	0.0294894	1.41636	0.887348	-0.529013	0.0933727	S	3	___1		binding;cation binding;ion binding;metal ion binding	cell part;intracellular membrane-bounded organelle;intracellular organelle;intracellular part;membrane-bounded organelle;nucleus;organelle		cell part;intracellular membrane-bounded organelle;intracellular organelle;nucleus;organelle			AAGCACA,MIR-218;AGTCAGC,MIR-345;ATGAAGG,MIR-205;CACCAGC,MIR-138;CAGTGTT,MIR-141,MIR-200A;CCAGGGG,MIR-331;CCCAGAG,MIR-326;CCTGCTG,MIR-214;chr15q22;CTATGCA,MIR-153;CTTTGTA,MIR-524;GACAATC,MIR-219;GAGCTGG,MIR-337;GCAAAAA,MIR-129;GGCAGAC,MIR-346;GGCAGCT,MIR-22;GSE18791_UNSTIM_VS_NEWCATSLE_VIRUS_DC_6H_UP;GSE22886_NAIVE_CD4_TCELL_VS_48H_ACT_TH1_UP;GSE22886_NAIVE_CD4_TCELL_VS_48H_ACT_TH2_UP;GSE25087_TRE…	Completeproteome;Metal-binding;Nucleus;Phosphoprotein;Referenceproteome;Zinc;Zinc-finger
1.71107	1.67272	1.93363	NaN	1.28787	0.417923	2.2517	NaN	1.85865	1.3699	1.25423	1.85326	2.42716	1.3873	0.944356	1.5982	1.37672	1.96181	0.716716	1.34439	1.8813	2.06911	1.08863	1.33096	2.15269	0.894576	NaN	1.38225	0.722575	-0.657184	-0.0834085	NaN	0.514995	0.0444678	1.63546	1.08863	-0.546825	0.0854296	S	2	___1		binding;cation binding;ion binding;metal ion binding	cell part;intracellular membrane-bounded organelle;intracellular organelle;intracellular part;membrane-bounded organelle;nucleus;organelle		cell part;intracellular membrane-bounded organelle;intracellular organelle;nucleus;organelle			AAGCACA,MIR-218;AGTCAGC,MIR-345;ATGAAGG,MIR-205;CACCAGC,MIR-138;CAGTGTT,MIR-141,MIR-200A;CCAGGGG,MIR-331;CCCAGAG,MIR-326;CCTGCTG,MIR-214;chr15q22;CTATGCA,MIR-153;CTTTGTA,MIR-524;GACAATC,MIR-219;GAGCTGG,MIR-337;GCAAAAA,MIR-129;GGCAGAC,MIR-346;GGCAGCT,MIR-22;GSE18791_UNSTIM_VS_NEWCATSLE_VIRUS_DC_6H_UP;GSE22886_NAIVE_CD4_TCELL_VS_48H_ACT_TH1_UP;GSE22886_NAIVE_CD4_TCELL_VS_48H_ACT_TH2_UP;GSE25087_TRE…	Completeproteome;Metal-binding;Nucleus;Phosphoprotein;Referenceproteome;Zinc;Zinc-finger
2.16122	NaN	1.98539	NaN	1.07773	NaN	1.37708	0.623289	NaN	1.27555	1.03157	1.4555	1.69256	NaN	1.26735	NaN	0.916337	1.99507	NaN	0.462811	1.03003	2.26981	0.956888	1.45216	1.86648	NaN	NaN	0.771895	NaN	NaN	0.0720453	NaN	NaN	0.332234	1.32631	0.993461	-0.332852	0.218097	S	2	___1		binding;cation binding;ion binding;metal ion binding	cell part;intracellular membrane-bounded organelle;intracellular organelle;intracellular part;membrane-bounded organelle;nucleus;organelle		cell part;intracellular membrane-bounded organelle;intracellular organelle;nucleus;organelle			AAGCACA,MIR-218;AGTCAGC,MIR-345;ATGAAGG,MIR-205;CACCAGC,MIR-138;CAGTGTT,MIR-141,MIR-200A;CCAGGGG,MIR-331;CCCAGAG,MIR-326;CCTGCTG,MIR-214;chr15q22;CTATGCA,MIR-153;CTTTGTA,MIR-524;GACAATC,MIR-219;GAGCTGG,MIR-337;GCAAAAA,MIR-129;GGCAGAC,MIR-346;GGCAGCT,MIR-22;GSE18791_UNSTIM_VS_NEWCATSLE_VIRUS_DC_6H_UP;GSE22886_NAIVE_CD4_TCELL_VS_48H_ACT_TH1_UP;GSE22886_NAIVE_CD4_TCELL_VS_48H_ACT_TH2_UP;GSE25087_TRE…	Completeproteome;Metal-binding;Nucleus;Phosphoprotein;Referenceproteome;Zinc;Zinc-finger
-2.16159	NaN	-1.73044	-2.31549	-1.73955	-1.17737	-2.33582	-2.56914	-2.31699	-2.64467	-2.15031	-1.65353	-1.84119	-1.91984	-1.77957	-3.40329	-1.71753	-2.00173	-0.676805	-1.50483	-1.41672	NaN	-1.18116	-1.879	-1.1567	-0.581756	NaN	-2.14766	NaN	-1.78138	-0.0951788	-1.41745	-0.832698	0.00050536	-2.00173	-1.29894	0.70279	0.0267581	S	4	___1	anatomical structure development;cellular component organization;cellular component organization at cellular level;cellular component organization or biogenesis;cellular component organization or biogenesis at cellular level;cellular process;COPII vesicle coating;developmental process;endoplasmic reticulum organization;establishment of localization;establishment of protein localization;organelle …		cell part;cytoplasm;cytoplasmic part;cytosol;endoplasmic reticulum membrane;endoplasmic reticulum part;Golgi apparatus;Golgi apparatus part;Golgi membrane;intracellular membrane-bounded organelle;intracellular organelle;intracellular organelle part;intracellular part;membrane;membrane part;membrane-bounded organelle;organelle;organelle membrane;organelle part	anatomical structure development;cellular component organization;cellular process;developmental process;endoplasmic reticulum organization;establishment of localization;organelle organization;protein transport;transport;vesicle organization	cell part;cytoplasm;cytosol;Golgi apparatus;intracellular membrane-bounded organelle;intracellular organelle;membrane;organelle		Sec16;Sec16_C	BROWNE_HCMV_INFECTION_1HR_DN;BROWNE_HCMV_INFECTION_48HR_DN;BYSTRYKH_HEMATOPOIESIS_STEM_CELL_QTL_TRANS;CAFFAREL_RESPONSE_TO_THC_24HR_5_DN;CHARAFE_BREAST_CANCER_LUMINAL_VS_BASAL_UP;chr9q34;DEBIASI_APOPTOSIS_BY_REOVIRUS_INFECTION_DN;GSE15750_DAY6_VS_DAY10_EFF_CD8_TCELL_DN;GSE15750_DAY6_VS_DAY10_TRAF6KO_EFF_CD8_TCELL_DN;GSE17721_0.5H_VS_12H_POLYIC_BMDM_UP;GSE17721_0.5H_VS_4H_LPS_BMDM_UP;GSE17721_0.5H…	Alternativesplicing;Completeproteome;Endoplasmicreticulum;ER-Golgitransport;Golgiapparatus;Membrane;Phosphoprotein;Polymorphism;Proteintransport;Referenceproteome;Transport
-1.11459	0.0477628	-0.459176	0.202547	0.0789851	0.383195	-0.788207	0.0452983	-0.420671	NaN	0.00271469	-0.747189	-1.58235	-0.523536	-0.197453	-0.77474	-0.972867	-1.21989	0.0927876	-1.85031	NaN	0.00873825	-1.282	-0.563145	-0.659276	0.259212	0.192255	-0.977688	-0.155618	-0.416848	0.216532	-1.41452	0.46023	0.873135	-0.459176	-0.286233	0.172943	0.283207	S	3	___1	anatomical structure development;cellular component organization;cellular component organization at cellular level;cellular component organization or biogenesis;cellular component organization or biogenesis at cellular level;cellular process;COPII vesicle coating;developmental process;endoplasmic reticulum organization;establishment of localization;establishment of protein localization;organelle …		cell part;cytoplasm;cytoplasmic part;cytosol;endoplasmic reticulum membrane;endoplasmic reticulum part;Golgi apparatus;Golgi apparatus part;Golgi membrane;intracellular membrane-bounded organelle;intracellular organelle;intracellular organelle part;intracellular part;membrane;membrane part;membrane-bounded organelle;organelle;organelle membrane;organelle part	anatomical structure development;cellular component organization;cellular process;developmental process;endoplasmic reticulum organization;establishment of localization;organelle organization;protein transport;transport;vesicle organization	cell part;cytoplasm;cytosol;Golgi apparatus;intracellular membrane-bounded organelle;intracellular organelle;membrane;organelle		Sec16;Sec16_C	BROWNE_HCMV_INFECTION_1HR_DN;BROWNE_HCMV_INFECTION_48HR_DN;BYSTRYKH_HEMATOPOIESIS_STEM_CELL_QTL_TRANS;CAFFAREL_RESPONSE_TO_THC_24HR_5_DN;CHARAFE_BREAST_CANCER_LUMINAL_VS_BASAL_UP;chr9q34;DEBIASI_APOPTOSIS_BY_REOVIRUS_INFECTION_DN;GSE15750_DAY6_VS_DAY10_EFF_CD8_TCELL_DN;GSE15750_DAY6_VS_DAY10_TRAF6KO_EFF_CD8_TCELL_DN;GSE17721_0.5H_VS_12H_POLYIC_BMDM_UP;GSE17721_0.5H_VS_4H_LPS_BMDM_UP;GSE17721_0.5H…	Alternativesplicing;Completeproteome;Endoplasmicreticulum;ER-Golgitransport;Golgiapparatus;Membrane;Phosphoprotein;Polymorphism;Proteintransport;Referenceproteome;Transport
-0.990445	NaN	NaN	NaN	-0.530425	NaN	-1.13346	-1.29888	NaN	NaN	-1.90413	-1.05803	-2.35148	NaN	-1.83209	NaN	NaN	-1.17247	NaN	NaN	NaN	-1.03827	-0.751707	NaN	NaN	-0.822044	NaN	NaN	NaN	NaN	-0.378525	NaN	-0.79814	0.0159995	-1.17247	-0.79814	0.374326	0.138021	S	3	___1	anatomical structure development;cellular component organization;cellular component organization at cellular level;cellular component organization or biogenesis;cellular component organization or biogenesis at cellular level;cellular process;COPII vesicle coating;developmental process;endoplasmic reticulum organization;establishment of localization;establishment of protein localization;organelle …		cell part;cytoplasm;cytoplasmic part;cytosol;endoplasmic reticulum membrane;endoplasmic reticulum part;Golgi apparatus;Golgi apparatus part;Golgi membrane;intracellular membrane-bounded organelle;intracellular organelle;intracellular organelle part;intracellular part;membrane;membrane part;membrane-bounded organelle;organelle;organelle membrane;organelle part	anatomical structure development;cellular component organization;cellular process;developmental process;endoplasmic reticulum organization;establishment of localization;organelle organization;protein transport;transport;vesicle organization	cell part;cytoplasm;cytosol;Golgi apparatus;intracellular membrane-bounded organelle;intracellular organelle;membrane;organelle		Sec16;Sec16_C	BROWNE_HCMV_INFECTION_1HR_DN;BROWNE_HCMV_INFECTION_48HR_DN;BYSTRYKH_HEMATOPOIESIS_STEM_CELL_QTL_TRANS;CAFFAREL_RESPONSE_TO_THC_24HR_5_DN;CHARAFE_BREAST_CANCER_LUMINAL_VS_BASAL_UP;chr9q34;DEBIASI_APOPTOSIS_BY_REOVIRUS_INFECTION_DN;GSE15750_DAY6_VS_DAY10_EFF_CD8_TCELL_DN;GSE15750_DAY6_VS_DAY10_TRAF6KO_EFF_CD8_TCELL_DN;GSE17721_0.5H_VS_12H_POLYIC_BMDM_UP;GSE17721_0.5H_VS_4H_LPS_BMDM_UP;GSE17721_0.5H…	Alternativesplicing;Completeproteome;Endoplasmicreticulum;ER-Golgitransport;Golgiapparatus;Membrane;Phosphoprotein;Polymorphism;Proteintransport;Referenceproteome;Transport
-0.492495	NaN	0.0635597	NaN	-0.0471237	-0.144185	-0.990317	NaN	1.55396	NaN	1.58904	1.01355	NaN	NaN	-0.366761	-0.871576	NaN	-0.836302	NaN	0.303442	NaN	NaN	0.850429	0.733182	0.417361	0.256818	-0.394212	0.404444	NaN	-1.90222	NaN	NaN	NaN	0.924101	-0.144185	0.353943	0.498128	0.0798002	S	3	___1	cellular macromolecule metabolic process;cellular metabolic process;cellular nitrogen compound metabolic process;cellular process;macromolecule metabolic process;metabolic process;nitrogen compound metabolic process;nucleic acid metabolic process;nucleobase-containing compound metabolic process;primary metabolic process;RNA metabolic process;RNA processing	binding;nucleotide binding	cell part;intracellular membrane-bounded organelle;intracellular organelle;intracellular organelle part;intracellular part;membrane-bounded organelle;nuclear part;nucleoplasm;nucleus;organelle;organelle part	cellular metabolic process;cellular nitrogen compound metabolic process;cellular process;macromolecule metabolic process;metabolic process;nitrogen compound metabolic process;nucleobase-containing compound metabolic process;primary metabolic process;RNA metabolic process;RNA processing	cell part;intracellular membrane-bounded organelle;intracellular organelle;nucleoplasm;nucleus;organelle	Spliceosome	cwf21;RRM_1;Surp	BERNARD_PPAPDC1B_TARGETS_UP;BROWNE_HCMV_INFECTION_12HR_DN;BRUINS_UVC_RESPONSE_VIA_TP53_GROUP_A;CAIRO_HEPATOBLASTOMA_CLASSES_UP;CHANDRAN_METASTASIS_TOP50_UP;CHANDRAN_METASTASIS_UP;chr3q23;DACOSTA_UV_RESPONSE_VIA_ERCC3_COMMON_DN;DACOSTA_UV_RESPONSE_VIA_ERCC3_DN;DANG_BOUND_BY_MYC;DODD_NASOPHARYNGEAL_CARCINOMA_DN;FARMER_BREAST_CANCER_APOCRINE_VS_LUMINAL;FARMER_BREAST_CANCER_BASAL_VS_LULMINAL;FEVR_CTN…	Acetylation;Alternativesplicing;Coiledcoil;Completeproteome;Nucleus;Phosphoprotein;Referenceproteome;RNA-binding
2.48115	1.05313	0.174947	NaN	-0.0637003	0.115299	NaN	1.39024	1.34873	1.63323	1.64148	1.68383	0.93457	NaN	0.803783	NaN	NaN	1.11906	1.07647	0.910259	-0.258925	NaN	1.67825	NaN	0.144708	-0.017081	NaN	1.62459	NaN	1.16808	1.53319	NaN	NaN	0.483074	1.11906	1.07647	-0.0425878	0.49155	S	2	___1	cellular macromolecule metabolic process;cellular metabolic process;cellular nitrogen compound metabolic process;cellular process;macromolecule metabolic process;metabolic process;nitrogen compound metabolic process;nucleic acid metabolic process;nucleobase-containing compound metabolic process;primary metabolic process;RNA metabolic process;RNA processing	binding;nucleotide binding	cell part;intracellular membrane-bounded organelle;intracellular organelle;intracellular organelle part;intracellular part;membrane-bounded organelle;nuclear part;nucleoplasm;nucleus;organelle;organelle part	cellular metabolic process;cellular nitrogen compound metabolic process;cellular process;macromolecule metabolic process;metabolic process;nitrogen compound metabolic process;nucleobase-containing compound metabolic process;primary metabolic process;RNA metabolic process;RNA processing	cell part;intracellular membrane-bounded organelle;intracellular organelle;nucleoplasm;nucleus;organelle	Spliceosome	cwf21;RRM_1;Surp	BERNARD_PPAPDC1B_TARGETS_UP;BROWNE_HCMV_INFECTION_12HR_DN;BRUINS_UVC_RESPONSE_VIA_TP53_GROUP_A;CAIRO_HEPATOBLASTOMA_CLASSES_UP;CHANDRAN_METASTASIS_TOP50_UP;CHANDRAN_METASTASIS_UP;chr3q23;DACOSTA_UV_RESPONSE_VIA_ERCC3_COMMON_DN;DACOSTA_UV_RESPONSE_VIA_ERCC3_DN;DANG_BOUND_BY_MYC;DODD_NASOPHARYNGEAL_CARCINOMA_DN;FARMER_BREAST_CANCER_APOCRINE_VS_LUMINAL;FARMER_BREAST_CANCER_BASAL_VS_LULMINAL;FEVR_CTN…	Acetylation;Alternativesplicing;Coiledcoil;Completeproteome;Nucleus;Phosphoprotein;Referenceproteome;RNA-binding
0.0593708	-0.292795	0.0232478	-0.402353	NaN	NaN	NaN	NaN	NaN	0.00875367	0.0175558	-0.131391	0.130857	NaN	-0.084649	-0.0611293	-0.495535	-0.218325	-1.06794	-0.287944	-0.0747935	NaN	0.775724	0.218244	-0.0110952	-0.282085	NaN	-0.118425	NaN	NaN	NaN	NaN	-0.86521	0.722279	-0.0728891	-0.118425	-0.045536	0.494563	S	3	___1	biological regulation;biosynthetic process;cellular biosynthetic process;cellular component organization;cellular component organization at cellular level;cellular component organization or biogenesis;cellular component organization or biogenesis at cellular level;cellular macromolecule biosynthetic process;cellular macromolecule metabolic process;cellular metabolic process;cellular nitrogen comp…	binding;catalytic activity;histone methyltransferase activity;histone methyltransferase activity (H3-K4 specific);histone-lysine N-methyltransferase activity;lysine N-methyltransferase activity;methyltransferase activity;N-methyltransferase activity;nucleic acid binding;nucleotide binding;protein methyltransferase activity;protein-lysine N-methyltransferase activity;RNA binding;S-adenosylmethioni…	cell part;chromatin remodeling complex;chromosome;histone methyltransferase complex;intracellular membrane-bounded organelle;intracellular non-membrane-bounded organelle;intracellular organelle;intracellular organelle part;intracellular part;macromolecular complex;membrane-bounded organelle;methyltransferase complex;non-membrane-bounded organelle;nuclear body;nuclear part;nuclear speck;nucleoplas…	biological regulation;biosynthetic process;cellular component organization;cellular metabolic process;cellular nitrogen compound metabolic process;cellular process;chromatin organization;chromosome organization;developmental process;macromolecule metabolic process;metabolic process;nitrogen compound metabolic process;nucleobase-containing compound metabolic process;organelle organization;primary …	cell part;chromatin remodeling complex;chromosome;histone methyltransferase complex;intracellular membrane-bounded organelle;intracellular non-membrane-bounded organelle;intracellular organelle;macromolecular complex;nucleoplasm;nucleus;organelle;protein complex	Lysine degradation	N-SET;RRM_1;SET	ACTTTAT,MIR-142-5P;AFFAR_YY1_TARGETS_DN;BYSTRYKH_HEMATOPOIESIS_STEM_CELL_QTL_TRANS;chr16p11;FLECHNER_PBL_KIDNEY_TRANSPLANT_OK_VS_DONOR_UP;FLECHNER_PBL_KIDNEY_TRANSPLANT_REJECTED_VS_OK_DN;GCM_GSPT1;GCM_NF2;GINESTIER_BREAST_CANCER_ZNF217_AMPLIFIED_DN;GSE14308_TH1_VS_NAIVE_CD4_TCELL_DN;GSE14308_TH17_VS_NATURAL_TREG_DN;GSE14308_TH2_VS_NAIVE_CD4_TCELL_DN;GSE1460_DP_THYMOCYTE_VS_THYMIC_STROMAL_CELL_UP;…	3D-structure;Activator;Chromatinregulator;Chromosome;Completeproteome;Methyltransferase;Nucleus;Phosphoprotein;Polymorphism;Referenceproteome;RNA-binding;S-adenosyl-L-methionine;Transcription;Transcriptionregulation;Transferase
NaN	NaN	NaN	NaN	-1.61879	-1.22935	NaN	NaN	-0.757118	-1.30665	-1.04091	NaN	-1.10988	-2.3195	-0.631812	NaN	-2.11436	NaN	-1.53782	NaN	NaN	NaN	-0.582506	-2.16993	-0.802528	-0.742721	NaN	-0.343825	-0.729709	-1.54295	NaN	NaN	NaN	0.33448	-1.22935	-0.772625	0.456728	0.0967396	S	3	___1	amine metabolic process;biosynthetic process;carboxylic acid metabolic process;cellular amine metabolic process;cellular amino acid metabolic process;cellular aromatic compound metabolic process;cellular biosynthetic process;cellular ketone metabolic process;cellular metabolic process;cellular nitrogen compound biosynthetic process;cellular nitrogen compound metabolic process;cellular process;'de…	adenyl nucleotide binding;adenyl ribonucleotide binding;ATP binding;binding;carbon-nitrogen ligase activity, with glutamine as amido-N-donor;catalytic activity;cation binding;ion binding;ligase activity;ligase activity, forming carbon-nitrogen bonds;metal ion binding;nucleotide binding;phosphoribosylformylglycinamidine synthase activity;purine nucleotide binding;purine ribonucleoside triphosphate…	cell part;cytoplasm;cytoplasmic part;cytosol;extracellular membrane-bounded organelle;extracellular organelle;extracellular region part;extracellular vesicular exosome;intracellular part;membrane-bounded organelle;membrane-bounded vesicle;organelle;vesicle	amine metabolic process;biosynthetic process;cellular amino acid metabolic process;cellular aromatic compound metabolic process;cellular ketone metabolic process;cellular metabolic process;cellular nitrogen compound metabolic process;cellular process;heterocycle metabolic process;metabolic process;nitrogen compound metabolic process;nucleobase-containing compound metabolic process;nucleobase-cont…	cell part;cytoplasm;cytosol;extracellular organelle;organelle;vesicle	Purine metabolism	AIRS;AIRS_C	BENPORATH_ES_1;BONOME_OVARIAN_CANCER_SURVIVAL_OPTIMAL_DEBULKING;CAIRO_HEPATOBLASTOMA_CLASSES_UP;CHARAFE_BREAST_CANCER_LUMINAL_VS_MESENCHYMAL_DN;chr17p13;DEBIASI_APOPTOSIS_BY_REOVIRUS_INFECTION_DN;DEURIG_T_CELL_PROLYMPHOCYTIC_LEUKEMIA_UP;GCM_DFFA;GNF2_RFC3;GSE10325_LUPUS_BCELL_VS_LUPUS_MYELOID_UP;GSE11924_TFH_VS_TH1_CD4_TCELL_DN;GSE12845_IGD_NEG_BLOOD_VS_DARKZONE_GC_TONSIL_BCELL_DN;GSE12845_IGD_NE…	ATP-binding;Completeproteome;Cytoplasm;Glutamineamidotransferase;Ligase;Magnesium;Metal-binding;Nucleotide-binding;Phosphoprotein;Polymorphism;Purinebiosynthesis;Referenceproteome
NaN	NaN	1.21477	NaN	NaN	NaN	NaN	NaN	-0.4507	NaN	NaN	NaN	NaN	0.718302	NaN	0.216825	-1.50336	0.275771	-0.525098	NaN	NaN	NaN	0.378632	NaN	NaN	NaN	0.988424	-0.129187	NaN	NaN	NaN	0.452552	NaN	0.749272	0.246298	0.378632	0.132335	0.319425	S	3	___1	actin cytoskeleton organization;actin filament-based process;axon guidance;biological regulation;cell surface receptor linked signaling pathway;cellular component movement;cellular component organization;cellular component organization at cellular level;cellular component organization or biogenesis;cellular component organization or biogenesis at cellular level;cellular process;cellular response …	binding;enzyme activator activity;enzyme regulator activity;G-protein-coupled receptor binding;GTPase activator activity;GTPase regulator activity;guanyl-nucleotide exchange factor activity;nucleoside-triphosphatase regulator activity;protein binding;Ras guanyl-nucleotide exchange factor activity;receptor binding;Rho guanyl-nucleotide exchange factor activity;small GTPase regulator activity	cell part;cytoplasm;cytoplasmic part;cytosol;intracellular;intracellular part;membrane	biological regulation;cellular component movement;cellular component organization;cellular process;cytokinesis;cytoskeleton organization;establishment or maintenance of cell polarity;locomotion;multicellular organismal process;muscle contraction;organelle organization;response to chemical stimulus;response to external stimulus;response to stimulus;signal transduction	cell part;cytoplasm;cytosol;intracellular;membrane	ko05152;Vascular smooth muscle contraction	PDZ;RGS-like;RhoGEF	AACTTT_UNKNOWN;BIOCARTA_MYOSIN_PATHWAY;BIOCARTA_PAR1_PATHWAY;BIOCARTA_RHO_PATHWAY;BIOPOLYMER_METABOLIC_PROCESS;BROWNE_HCMV_INFECTION_48HR_DN;CACTGTG,MIR-128A,MIR-128B;CELL_SURFACE_RECEPTOR_LINKED_SIGNAL_TRANSDUCTION_GO_0007166;chr1q21;ENZYME_REGULATOR_ACTIVITY;G_PROTEIN_COUPLED_RECEPTOR_PROTEIN_SIGNALING_PATHWAY;GACTGTT,MIR-212,MIR-132;GCACTTT,MIR-17-5P,MIR-20A,MIR-106A,MIR-106B,MIR-20B,MIR-519D;…	3D-structure;Alternativesplicing;Coiledcoil;Completeproteome;Cytoplasm;GTPaseactivation;Guanine-nucleotidereleasingfactor;Membrane;Phosphoprotein;Polymorphism;Referenceproteome;Ublconjugation
3.64036	4.4895	4.29869	3.21773	3.6626	3.28364	NaN	4.18456	3.5515	4.68548	4.15556	3.51429	4.2744	4.49543	4.93007	4.77293	2.58154	2.35316	3.88764	2.99618	4.38881	2.85607	1.1743	3.47743	2.73476	3.36158	2.1228	3.20383	3.80341	2.28441	3.27797	4.97592	2.85699	0.022607	4.15556	3.20383	-0.951725	0.00643323	S	2	___1	activation of immune response;antigen receptor-mediated signaling pathway;biological regulation;cell surface receptor linked signaling pathway;cellular macromolecule metabolic process;cellular metabolic process;cellular process;cellular protein metabolic process;cellular response to stimulus;establishment of localization;establishment of localization in cell;establishment of protein localization;…	binding;protein binding;receptor binding	actin cytoskeleton;cell part;cytoplasmic part;cytoskeleton;cytosol;intracellular membrane-bounded organelle;intracellular non-membrane-bounded organelle;intracellular organelle;intracellular part;membrane-bounded organelle;non-membrane-bounded organelle;nucleus;organelle	biological regulation;cellular metabolic process;cellular process;establishment of localization;immune system process;macromolecule metabolic process;macromolecule modification;metabolic process;nuclear transport;nucleocytoplasmic transport;phosphorus metabolic process;primary metabolic process;protein metabolic process;protein modification process;protein phosphorylation;protein targeting;protei…	cell part;cytoskeleton;cytosol;intracellular membrane-bounded organelle;intracellular non-membrane-bounded organelle;intracellular organelle;nucleus;organelle		hSH3;SH3_2	ACEVEDO_LIVER_CANCER_WITH_H3K9ME3_UP;ACEVEDO_METHYLATED_IN_LIVER_CANCER_DN;ACTIN_CYTOSKELETON;AFFAR_YY1_TARGETS_UP;BIOPOLYMER_METABOLIC_PROCESS;BIOPOLYMER_MODIFICATION;BOYLAN_MULTIPLE_MYELOMA_C_D_DN;BOYLAN_MULTIPLE_MYELOMA_PCA1_UP;BROWNE_HCMV_INFECTION_2HR_UP;CELLULAR_LOCALIZATION;CELLULAR_MACROMOLECULE_METABOLIC_PROCESS;CELLULAR_PROTEIN_METABOLIC_PROCESS;CHIARETTI_T_ALL_REFRACTORY_TO_THERAPY;chr…	3D-structure;Acetylation;Alternativesplicing;Coiledcoil;Completeproteome;Cytoplasm;Directproteinsequencing;Nucleus;Phosphoprotein;Polymorphism;Referenceproteome;SH3domain
NaN	NaN	NaN	NaN	NaN	NaN	-2.604	-0.317979	NaN	-2.06104	NaN	NaN	-1.48556	NaN	0.688636	NaN	NaN	NaN	0.272316	0.265747	NaN	NaN	-1.46782	-2.18424	NaN	NaN	0.013138	0.0278743	NaN	NaN	-0.22588	NaN	0.318535	0.291544	-1.48556	0.0205062	1.50606	3.32326e-05	S	3	___1	actin cytoskeleton organization;actin filament organization;actin filament-based process;actin nucleation;Arp2/3 complex-mediated actin nucleation;biological regulation;cellular component movement;cellular component organization;cellular component organization at cellular level;cellular component organization or biogenesis;cellular component organization or biogenesis at cellular level;cellular p…	structural constituent of cytoskeleton;structural molecule activity	actin cytoskeleton;adherens junction;anchoring junction;Arp2/3 protein complex;cell junction;cell part;cell-substrate adherens junction;cell-substrate junction;cytoplasm;cytoskeletal part;cytoskeleton;extracellular membrane-bounded organelle;extracellular organelle;extracellular region part;extracellular vesicular exosome;focal adhesion;intracellular non-membrane-bounded organelle;intracellular o…	biological regulation;cellular component movement;cellular component organization;cellular process;cytoskeleton organization;organelle organization;regulation of organelle organization	cell part;cytoplasm;cytoskeleton;extracellular organelle;intracellular non-membrane-bounded organelle;intracellular organelle;macromolecular complex;organelle;protein complex;vesicle	Bacterial invasion of epithelial cells;Fc gamma R-mediated phagocytosis;Pathogenic Escherichia coli infection;Regulation of actin cytoskeleton;Shigellosis	WD40	ACEVEDO_FGFR1_TARGETS_IN_PROSTATE_CANCER_MODEL_UP;ACTIN_CYTOSKELETON;AGUIRRE_PANCREATIC_CANCER_COPY_NUMBER_UP;BIOCARTA_ACTINY_PATHWAY;BIOCARTA_CDC42RAC_PATHWAY;BIOCARTA_MPR_PATHWAY;BIOCARTA_RHO_PATHWAY;BIOCARTA_SALMONELLA_PATHWAY;BLALOCK_ALZHEIMERS_DISEASE_INCIPIENT_UP;BLALOCK_ALZHEIMERS_DISEASE_UP;CHEN_METABOLIC_SYNDROM_NETWORK;chr7q;CYTOSKELETAL_PART;CYTOSKELETON;GNF2_CASP1;GNF2_FGR;GNF2_MYD88;…	Acetylation;Actin-binding;Completeproteome;Cytoplasm;Cytoskeleton;Directproteinsequencing;Polymorphism;Referenceproteome;Repeat;WDrepeat
NaN	NaN	0.876557	NaN	0.78884	0.835245	NaN	NaN	NaN	0.575462	0.295655	NaN	NaN	NaN	-0.093952	NaN	NaN	NaN	NaN	NaN	-0.61118	NaN	1.8218	0.416729	NaN	0.345242	NaN	-0.0475257	NaN	2.61661	-0.735607	NaN	NaN	0.995992	0.682151	0.345242	-0.33691	0.214811	S	2	___1	cellular component organization;cellular component organization at cellular level;cellular component organization or biogenesis;cellular component organization or biogenesis at cellular level;cellular membrane fusion;cellular membrane organization;cellular process;ER to Golgi vesicle-mediated transport;establishment of localization;establishment of localization in cell;establishment of protein lo…		cell part;cis-Golgi network;cytoplasmic part;endoplasmic reticulum membrane;endoplasmic reticulum part;Golgi apparatus part;Golgi cisterna;Golgi membrane;integral to membrane;intracellular organelle part;intracellular part;intrinsic to membrane;membrane;membrane part;organelle membrane;organelle part;organelle subcompartment	cellular component organization;cellular membrane organization;cellular process;establishment of localization;Golgi vesicle transport;membrane fusion;membrane organization;organelle fusion;organelle organization;protein transport;transport;vesicle organization;vesicle-mediated transport	cell part;membrane	SNARE interactions in vesicular transport	SNARE	AACATTC,MIR-409-3P;AATGTGA,MIR-23A,MIR-23B;ACATTCC,MIR-1,MIR-206;ACEVEDO_LIVER_CANCER_UP;ACTAYRNNNCCCR_UNKNOWN;AGUIRRE_PANCREATIC_CANCER_COPY_NUMBER_UP;BLALOCK_ALZHEIMERS_DISEASE_DN;BORCZUK_MALIGNANT_MESOTHELIOMA_UP;BRUINS_UVC_RESPONSE_LATE;BUYTAERT_PHOTODYNAMIC_THERAPY_STRESS_UP;BYSTRYKH_HEMATOPOIESIS_STEM_CELL_QTL_TRANS;CELLULAR_LOCALIZATION;chr7q21;CTTTGT_V$LEF1_Q2;CYCLIN_D1_KE_.V1_DN;CYTOPLAS…	3D-structure;Alternativesplicing;Coiledcoil;Completeproteome;Endoplasmicreticulum;ER-Golgitransport;Golgiapparatus;Membrane;Phosphoprotein;Proteintransport;Referenceproteome;Transmembrane;Transmembranehelix;Transport
NaN	NaN	NaN	-1.51103	-2.89761	-2.10174	NaN	NaN	-2.7933	-3.86415	-1.55184	-1.98034	NaN	NaN	-5.89493	-2.82578	-2.31468	-1.69321	-1.42762	NaN	-1.67538	NaN	-1.0079	NaN	-1.13122	-3.32424	NaN	-3.67577	NaN	-2.22917	-2.72887	NaN	NaN	0.331901	-2.31468	-1.95227	0.362406	0.144864	S	2	___1	cellular component organization;cellular component organization at cellular level;cellular component organization or biogenesis;cellular component organization or biogenesis at cellular level;cellular membrane fusion;cellular membrane organization;cellular process;ER to Golgi vesicle-mediated transport;establishment of localization;establishment of localization in cell;establishment of protein lo…		cell part;cis-Golgi network;cytoplasmic part;endoplasmic reticulum membrane;endoplasmic reticulum part;Golgi apparatus part;Golgi cisterna;Golgi membrane;integral to membrane;intracellular organelle part;intracellular part;intrinsic to membrane;membrane;membrane part;organelle membrane;organelle part;organelle subcompartment	cellular component organization;cellular membrane organization;cellular process;establishment of localization;Golgi vesicle transport;membrane fusion;membrane organization;organelle fusion;organelle organization;protein transport;transport;vesicle organization;vesicle-mediated transport	cell part;membrane	SNARE interactions in vesicular transport	SNARE	AACATTC,MIR-409-3P;AATGTGA,MIR-23A,MIR-23B;ACATTCC,MIR-1,MIR-206;ACEVEDO_LIVER_CANCER_UP;ACTAYRNNNCCCR_UNKNOWN;AGUIRRE_PANCREATIC_CANCER_COPY_NUMBER_UP;BLALOCK_ALZHEIMERS_DISEASE_DN;BORCZUK_MALIGNANT_MESOTHELIOMA_UP;BRUINS_UVC_RESPONSE_LATE;BUYTAERT_PHOTODYNAMIC_THERAPY_STRESS_UP;BYSTRYKH_HEMATOPOIESIS_STEM_CELL_QTL_TRANS;CELLULAR_LOCALIZATION;chr7q21;CTTTGT_V$LEF1_Q2;CYCLIN_D1_KE_.V1_DN;CYTOPLAS…	3D-structure;Alternativesplicing;Coiledcoil;Completeproteome;Endoplasmicreticulum;ER-Golgitransport;Golgiapparatus;Membrane;Phosphoprotein;Proteintransport;Referenceproteome;Transmembrane;Transmembranehelix;Transport
-0.497953	0.0986779	0.287977	-0.229995	-0.124959	-0.340353	-0.320896	0.643482	0.0175575	-0.286379	NaN	NaN	0.545376	NaN	0.752569	-0.55902	-0.137813	0.716627	-1.43339	-0.194865	0.0127149	0.178905	0.125964	0.685365	0.478233	-1.2983	-1.29076	0.239327	-0.398913	NaN	0.193834	-0.473129	-0.395441	0.185387	-0.124959	-0.0910752	0.0338838	0.414069	S	2	___1	biological regulation;biosynthetic process;calcium ion homeostasis;catabolic process;cation homeostasis;cellular biosynthetic process;cellular macromolecule biosynthetic process;cellular macromolecule metabolic process;cellular metabolic process;cellular nitrogen compound metabolic process;cellular process;cellular protein metabolic process;cellular response to chemical stimulus;cellular response…	acid-amino acid ligase activity;binding;catalytic activity;cation binding;chromatin binding;DNA binding;estrogen response element binding;histone acetyl-lysine binding;histone binding;ion binding;kinase activity;ligase activity;ligase activity, forming carbon-nitrogen bonds;metal ion binding;nucleic acid binding;p53 binding;phosphotransferase activity, alcohol group as acceptor;protein binding;pr…	cell part;chromatin;chromosomal part;cytoplasmic part;cytosol;euchromatin;intracellular membrane-bounded organelle;intracellular organelle;intracellular organelle part;intracellular part;membrane-bounded organelle;nuclear chromatin;nuclear chromosome part;nuclear euchromatin;nuclear part;nucleoplasm;nucleus;organelle;organelle part;perichromatin fibrils	biological regulation;biosynthetic process;catabolic process;cellular metabolic process;cellular nitrogen compound metabolic process;cellular process;homeostatic process;macromolecule metabolic process;macromolecule modification;metabolic process;nitrogen compound metabolic process;nucleobase-containing compound metabolic process;phosphorus metabolic process;primary metabolic process;protein cata…	cell part;cytosol;intracellular membrane-bounded organelle;intracellular organelle;nucleoplasm;nucleus;organelle		Bromodomain;PHD;zf-B_box	AAAGACA,MIR-511;BENPORATH_ES_1;BENPORATH_MYC_MAX_TARGETS;BENPORATH_NANOG_TARGETS;BENPORATH_NOS_TARGETS;BENPORATH_OCT4_TARGETS;BENPORATH_SOX2_TARGETS;BIOPOLYMER_METABOLIC_PROCESS;BLALOCK_ALZHEIMERS_DISEASE_UP;chr7q32;COLIN_PILOCYTIC_ASTROCYTOMA_VS_GLIOBLASTOMA_DN;CREIGHTON_ENDOCRINE_THERAPY_RESISTANCE_2;CTTTGT_V$LEF1_Q2;DACOSTA_UV_RESPONSE_VIA_ERCC3_DN;DACOSTA_UV_RESPONSE_VIA_ERCC3_TTD_DN;DODD_NAS…	3D-structure;Alternativesplicing;Bromodomain;Chromosomalrearrangement;Coiledcoil;Completeproteome;Cytoplasm;Directproteinsequencing;DNA-binding;Isopeptidebond;Ligase;Metal-binding;Nucleus;Phosphoprotein;Polymorphism;Referenceproteome;Repeat;Repressor;Transcription;Transcriptionregulation;Tumorsuppressor;Ublconjugation;Ublconjugationpathway;Zinc;Zinc-finger
NaN	NaN	0.280264	-0.401575	-0.0398318	-0.226984	-0.215167	0.167669	-0.124707	-0.0871344	0.29819	-0.401741	0.0849264	-0.519802	0.418146	-0.564924	-0.0975682	0.885017	-1.05197	-0.220748	0.172155	-0.433908	-0.316262	0.666289	1.19967	-0.87409	-1.28392	0.170085	NaN	0.495581	0.679012	0.0809051	-0.485489	0.810818	-0.0923513	-0.0699214	0.0224298	0.425537	S	4	___1	biological regulation;biosynthetic process;calcium ion homeostasis;catabolic process;cation homeostasis;cellular biosynthetic process;cellular macromolecule biosynthetic process;cellular macromolecule metabolic process;cellular metabolic process;cellular nitrogen compound metabolic process;cellular process;cellular protein metabolic process;cellular response to chemical stimulus;cellular response…	acid-amino acid ligase activity;binding;catalytic activity;cation binding;chromatin binding;DNA binding;estrogen response element binding;histone acetyl-lysine binding;histone binding;ion binding;kinase activity;ligase activity;ligase activity, forming carbon-nitrogen bonds;metal ion binding;nucleic acid binding;p53 binding;phosphotransferase activity, alcohol group as acceptor;protein binding;pr…	cell part;chromatin;chromosomal part;cytoplasmic part;cytosol;euchromatin;intracellular membrane-bounded organelle;intracellular organelle;intracellular organelle part;intracellular part;membrane-bounded organelle;nuclear chromatin;nuclear chromosome part;nuclear euchromatin;nuclear part;nucleoplasm;nucleus;organelle;organelle part;perichromatin fibrils	biological regulation;biosynthetic process;catabolic process;cellular metabolic process;cellular nitrogen compound metabolic process;cellular process;homeostatic process;macromolecule metabolic process;macromolecule modification;metabolic process;nitrogen compound metabolic process;nucleobase-containing compound metabolic process;phosphorus metabolic process;primary metabolic process;protein cata…	cell part;cytosol;intracellular membrane-bounded organelle;intracellular organelle;nucleoplasm;nucleus;organelle		Bromodomain;PHD;zf-B_box	AAAGACA,MIR-511;BENPORATH_ES_1;BENPORATH_MYC_MAX_TARGETS;BENPORATH_NANOG_TARGETS;BENPORATH_NOS_TARGETS;BENPORATH_OCT4_TARGETS;BENPORATH_SOX2_TARGETS;BIOPOLYMER_METABOLIC_PROCESS;BLALOCK_ALZHEIMERS_DISEASE_UP;chr7q32;COLIN_PILOCYTIC_ASTROCYTOMA_VS_GLIOBLASTOMA_DN;CREIGHTON_ENDOCRINE_THERAPY_RESISTANCE_2;CTTTGT_V$LEF1_Q2;DACOSTA_UV_RESPONSE_VIA_ERCC3_DN;DACOSTA_UV_RESPONSE_VIA_ERCC3_TTD_DN;DODD_NAS…	3D-structure;Alternativesplicing;Bromodomain;Chromosomalrearrangement;Coiledcoil;Completeproteome;Cytoplasm;Directproteinsequencing;DNA-binding;Isopeptidebond;Ligase;Metal-binding;Nucleus;Phosphoprotein;Polymorphism;Referenceproteome;Repeat;Repressor;Transcription;Transcriptionregulation;Tumorsuppressor;Ublconjugation;Ublconjugationpathway;Zinc;Zinc-finger
-0.03313	0.189941	-0.674131	NaN	-1.10808	NaN	0.299974	0.75232	-1.17313	-1.21391	-0.25848	0.152681	NaN	-2.61587	-0.173862	NaN	NaN	0.351121	0.37631	0.485573	NaN	0.351542	0.701441	-0.063227	NaN	NaN	-1.18436	0.282504	NaN	-0.519113	-1.50156	NaN	NaN	0.411985	-0.173862	0.282504	0.456366	0.0968983	S	3	___1	biological regulation;biosynthetic process;cellular biosynthetic process;cellular macromolecule biosynthetic process;cellular macromolecule metabolic process;cellular metabolic process;cellular nitrogen compound metabolic process;cellular process;macromolecule biosynthetic process;macromolecule metabolic process;metabolic process;negative regulation of biological process;negative regulation of bi…	binding;DNA binding;nucleic acid binding	cell part;cytoplasmic part;endoplasmic reticulum;intracellular membrane-bounded organelle;intracellular non-membrane-bounded organelle;intracellular organelle;intracellular organelle part;intracellular part;membrane-bounded organelle;non-membrane-bounded organelle;nuclear part;nucleolus;nucleus;organelle;organelle part	biological regulation;biosynthetic process;cellular metabolic process;cellular nitrogen compound metabolic process;cellular process;macromolecule metabolic process;metabolic process;nitrogen compound metabolic process;nucleobase-containing compound metabolic process;primary metabolic process;RNA metabolic process	cell part;endoplasmic reticulum;intracellular membrane-bounded organelle;intracellular non-membrane-bounded organelle;intracellular organelle;nucleolus;nucleus;organelle		G-patch;R3H	CATTTCA,MIR-203;chrxq24;CTTTGTA,MIR-524;GEORGES_TARGETS_OF_MIR192_AND_MIR215;GREGORY_SYNTHETIC_LETHAL_WITH_IMATINIB;GSE10325_BCELL_VS_LUPUS_BCELL_UP;GSE10325_LUPUS_BCELL_VS_LUPUS_MYELOID_UP;GSE13411_IGM_MEMORY_BCELL_VS_PLASMA_CELL_UP;GSE13411_SWITCHED_MEMORY_BCELL_VS_PLASMA_CELL_UP;GSE13484_UNSTIM_VS_YF17D_VACCINE_STIM_PBMC_UP;GSE20366_EX_VIVO_VS_HOMEOSTATIC_CONVERSION_NAIVE_CD4_TCELL_UP;GSE2197_…	Alternativesplicing;Completeproteome;DNA-binding;Nucleus;Referenceproteome;Repressor;Transcription;Transcriptionregulation
NaN	3.22761	3.50073	3.33321	2.97304	3.38718	NaN	1.777	3.74286	NaN	2.69004	3.68593	2.21622	0.0901643	1.02599	0.701949	-0.681042	NaN	2.58697	0.633267	NaN	2.11771	NaN	NaN	1.91008	2.83537	-1.14075	2.21438	2.14792	-0.781841	0.869836	NaN	2.61362	0.16955	2.83154	2.11771	-0.713831	0.0335816	S	2	___1		binding;cation binding;ion binding;metal ion binding;transition metal ion binding;zinc ion binding	actin cytoskeleton;adherens junction;anchoring junction;cell junction;cell part;cell-substrate adherens junction;cell-substrate junction;cytoplasm;cytoskeleton;focal adhesion;intracellular non-membrane-bounded organelle;intracellular organelle;intracellular part;membrane;non-membrane-bounded organelle;organelle;plasma membrane		cell part;cytoplasm;cytoskeleton;intracellular non-membrane-bounded organelle;intracellular organelle;membrane;organelle;plasma membrane			ACEVEDO_LIVER_CANCER_WITH_H3K9ME3_DN;BAELDE_DIABETIC_NEPHROPATHY_DN;BASAKI_YBX1_TARGETS_UP;BENPORATH_NANOG_TARGETS;BHAT_ESR1_TARGETS_NOT_VIA_AKT1_UP;BHAT_ESR1_TARGETS_VIA_AKT1_UP;CASORELLI_ACUTE_PROMYELOCYTIC_LEUKEMIA_UP;CATION_BINDING;chrxq28;CONCANNON_APOPTOSIS_BY_EPOXOMICIN_UP;CROMER_TUMORIGENESIS_DN;CUI_TCF21_TARGETS_2_DN;DCA_UP.V1_UP;DODD_NASOPHARYNGEAL_CARCINOMA_UP;DUTERTRE_ESTRADIOL_RESPON…	Alternativesplicing;Celljunction;Completeproteome;Cytoplasm;Cytoskeleton;LIMdomain;Metal-binding;Referenceproteome;Zinc
-0.141256	-0.391102	-0.434704	0.00477043	-0.518	-0.259074	0.153811	-0.439661	-0.195354	-0.0347849	-0.131846	0.17141	0.190773	NaN	-0.197315	NaN	NaN	0.250184	0.134958	-0.519434	0.419669	0.0751376	0.0607908	-0.426534	0.0609993	-0.0593858	-0.168117	-0.459551	NaN	-0.509393	0.0465126	NaN	-0.238632	0.926263	-0.141256	-0.0593858	0.08187	0.366919	S	3	___1	biological regulation;catabolic process;cellular catabolic process;cellular localization;cellular macromolecule catabolic process;cellular macromolecule localization;cellular macromolecule metabolic process;cellular metabolic process;cellular nitrogen compound metabolic process;cellular process;establishment of localization;establishment of RNA localization;gene expression;intracellular mRNA loca…	binding;enzyme binding;identical protein binding;protein binding;ubiquitin protein ligase binding	cell part;cytoplasmic part;cytosol;exon-exon junction complex;intracellular organelle part;intracellular part;macromolecular complex;nuclear body;nuclear part;nuclear speck;nucleoplasm part;organelle part;perinuclear region of cytoplasm;protein complex;ribonucleoprotein complex	biological regulation;catabolic process;cellular localization;cellular metabolic process;cellular nitrogen compound metabolic process;cellular process;establishment of localization;localization;macromolecule metabolic process;metabolic process;mRNA metabolic process;mRNA processing;nitrogen compound metabolic process;nucleobase-containing compound metabolic process;nucleobase-containing compound …	cell part;cytosol;macromolecular complex;protein complex;ribonucleoprotein complex	mRNA surveillance pathway;RNA transport	Btz	ACTGTGA,MIR-27A,MIR-27B;BLALOCK_ALZHEIMERS_DISEASE_UP;BOYAULT_LIVER_CANCER_SUBCLASS_G3_UP;CAATGCA,MIR-33;CACTGTG,MIR-128A,MIR-128B;chr17q11;CTCAGGG,MIR-125B,MIR-125A;GCCATNTTG_V$YY1_Q6;GRAESSMANN_APOPTOSIS_BY_DOXORUBICIN_DN;GRAESSMANN_RESPONSE_TO_MC_AND_DOXORUBICIN_DN;GSE11864_UNTREATED_VS_CSF1_IN_MAC_DN;GSE11864_UNTREATED_VS_CSF1_PAM3CYS_IN_MAC_DN;GSE11924_TH1_VS_TH2_CD4_TCELL_UP;GSE11924_TH2_VS…	3D-structure;ADP-ribosylation;Coiledcoil;Completeproteome;Cytoplasm;mRNAprocessing;mRNAsplicing;mRNAtransport;Nonsense-mediatedmRNAdecay;Nucleus;Phosphoprotein;Referenceproteome;RNA-binding;Stressresponse;Translationregulation;Transport;Ublconjugation
-0.0155179	NaN	-0.263876	NaN	-0.306093	-0.253679	0.173178	0.102721	-0.188047	-0.144901	-0.322577	-0.173967	0.119082	0.21871	NaN	NaN	0.3816	0.133882	0.30169	NaN	NaN	0.410801	-0.0214805	-0.258846	0.330392	0.00487948	-0.352028	-0.0803873	-0.192034	-0.465931	0.097566	0.36435	NaN	0.636793	-0.0802095	-0.00830051	0.071909	0.376568	S	3	___1	biological regulation;catabolic process;cellular catabolic process;cellular localization;cellular macromolecule catabolic process;cellular macromolecule localization;cellular macromolecule metabolic process;cellular metabolic process;cellular nitrogen compound metabolic process;cellular process;establishment of localization;establishment of RNA localization;gene expression;intracellular mRNA loca…	binding;enzyme binding;identical protein binding;protein binding;ubiquitin protein ligase binding	cell part;cytoplasmic part;cytosol;exon-exon junction complex;intracellular organelle part;intracellular part;macromolecular complex;nuclear body;nuclear part;nuclear speck;nucleoplasm part;organelle part;perinuclear region of cytoplasm;protein complex;ribonucleoprotein complex	biological regulation;catabolic process;cellular localization;cellular metabolic process;cellular nitrogen compound metabolic process;cellular process;establishment of localization;localization;macromolecule metabolic process;metabolic process;mRNA metabolic process;mRNA processing;nitrogen compound metabolic process;nucleobase-containing compound metabolic process;nucleobase-containing compound …	cell part;cytosol;macromolecular complex;protein complex;ribonucleoprotein complex	mRNA surveillance pathway;RNA transport	Btz	ACTGTGA,MIR-27A,MIR-27B;BLALOCK_ALZHEIMERS_DISEASE_UP;BOYAULT_LIVER_CANCER_SUBCLASS_G3_UP;CAATGCA,MIR-33;CACTGTG,MIR-128A,MIR-128B;chr17q11;CTCAGGG,MIR-125B,MIR-125A;GCCATNTTG_V$YY1_Q6;GRAESSMANN_APOPTOSIS_BY_DOXORUBICIN_DN;GRAESSMANN_RESPONSE_TO_MC_AND_DOXORUBICIN_DN;GSE11864_UNTREATED_VS_CSF1_IN_MAC_DN;GSE11864_UNTREATED_VS_CSF1_PAM3CYS_IN_MAC_DN;GSE11924_TH1_VS_TH2_CD4_TCELL_UP;GSE11924_TH2_VS…	3D-structure;ADP-ribosylation;Coiledcoil;Completeproteome;Cytoplasm;mRNAprocessing;mRNAsplicing;mRNAtransport;Nonsense-mediatedmRNAdecay;Nucleus;Phosphoprotein;Referenceproteome;RNA-binding;Stressresponse;Translationregulation;Transport;Ublconjugation
NaN	-0.255398	NaN	NaN	NaN	NaN	NaN	NaN	-1.37087	-0.164567	NaN	NaN	-0.95334	NaN	-0.854049	NaN	-1.3587	NaN	-0.338694	NaN	NaN	NaN	NaN	NaN	NaN	NaN	NaN	NaN	0.1819	-0.525437	NaN	0.0406866	0.184014	0.020225	-0.903694	0.0406866	0.944381	0.00539151	S	3	___1	actin cytoskeleton organization;actin filament organization;actin filament-based process;alcohol metabolic process;biological adhesion;biological regulation;biosynthetic process;carbohydrate metabolic process;cell adhesion;cellular biosynthetic process;cellular carbohydrate metabolic process;cellular component organization;cellular component organization at cellular level;cellular component organ…	binding;catalytic activity;hydrolase activity;protein binding;protein domain specific binding;SH2 domain binding	cell part;cell projection;cytoplasm;cytoplasmic part;cytoskeleton;cytosol;filopodium;Golgi apparatus;intracellular membrane-bounded organelle;intracellular non-membrane-bounded organelle;intracellular organelle;intracellular part;lamellipodium;membrane;membrane-bounded organelle;non-membrane-bounded organelle;organelle;plasma membrane	alcohol metabolic process;biological adhesion;biological regulation;biosynthetic process;carbohydrate metabolic process;cell adhesion;cellular component organization;cellular lipid metabolic process;cellular membrane organization;cellular metabolic process;cellular process;cytoskeleton organization;developmental process;endocytosis;establishment of localization;immune system process;lipid metabol…	cell part;cell projection;cytoplasm;cytoskeleton;cytosol;filopodium;Golgi apparatus;intracellular membrane-bounded organelle;intracellular non-membrane-bounded organelle;intracellular organelle;membrane;organelle;plasma membrane	Inositol phosphate metabolism;Phosphatidylinositol signaling system	Exo_endo_phos;SAM_1;SH2	AACTTT_UNKNOWN;ATGAAGG,MIR-205;BANDRES_RESPONSE_TO_CARMUSTIN_MGMT_48HR_DN;BANDRES_RESPONSE_TO_CARMUSTIN_WITHOUT_MGMT_24HR_DN;BANDRES_RESPONSE_TO_CARMUSTIN_WITHOUT_MGMT_48HR_DN;BIOCARTA_IGF1MTOR_PATHWAY;BLALOCK_ALZHEIMERS_DISEASE_UP;CAGCTG_V$AP4_Q5;chr11q23;CRX_NRL_DN.V1_DN;CTAWWWATA_V$RSRFC4_Q2;CTGYNNCTYTAA_UNKNOWN;CTTTAAR_UNKNOWN;DAIRKEE_CANCER_PRONE_RESPONSE_BPA;DELACROIX_RAR_BOUND_ES;DELACROIX…	3D-structure;Actin-binding;Alternativesplicing;Celladhesion;Cellprojection;Completeproteome;Cytoplasm;Cytoskeleton;Diabetesmellitus;Diseasemutation;Hydrolase;Immunity;Membrane;Phosphoprotein;Polymorphism;Referenceproteome;SH2domain;SH3-binding
NaN	1.42687	0.443483	1.62047	1.18322	1.32584	2.02933	NaN	NaN	1.7308	1.06261	0.812289	NaN	NaN	1.21912	1.73231	0.426781	0.488448	NaN	1.29329	0.598503	NaN	0.283881	1.07717	NaN	0.447163	NaN	1.03061	NaN	0.813116	0.31404	2.02745	0.382016	0.123811	1.21912	0.70581	-0.513307	0.100819	S	2	___1	biological regulation;cellular component assembly;cellular component assembly at cellular level;cellular component organization;cellular component organization at cellular level;cellular component organization or biogenesis;cellular component organization or biogenesis at cellular level;cellular localization;cellular membrane fusion;cellular membrane organization;cellular process;establishment of…	binding;channel inhibitor activity;channel regulator activity;chloride channel inhibitor activity;chloride channel regulator activity;ion channel inhibitor activity;protein binding;SNAP receptor activity;SNARE binding;syntaxin binding	azurophil granule;cell part;cytoplasmic membrane-bounded vesicle;cytoplasmic part;cytoplasmic vesicle;early endosome;early endosome membrane;endocytic vesicle;endomembrane system;endosomal part;endosome;endosome membrane;extracellular membrane-bounded organelle;extracellular organelle;extracellular region part;extracellular vesicular exosome;immunological synapse;integral to membrane;intracellula…	biological regulation;cellular component assembly;cellular component organization;cellular localization;cellular membrane organization;cellular process;establishment of localization;localization;membrane docking;membrane fusion;membrane organization;organelle assembly;organelle fusion;organelle localization;organelle organization;protein transport;transport;vesicle organization	cell part;cytoplasmic membrane-bounded vesicle;endomembrane system;endosome;extracellular organelle;intracellular membrane-bounded organelle;intracellular organelle;lysosome;macromolecular complex;membrane;organelle;plasma membrane;protein complex;vacuole;vesicle	Phagosome;SNARE interactions in vesicular transport	SNARE	BAELDE_DIABETIC_NEPHROPATHY_DN;BENPORATH_MYC_MAX_TARGETS;CASORELLI_ACUTE_PROMYELOCYTIC_LEUKEMIA_DN;CELLULAR_LOCALIZATION;CHEN_METABOLIC_SYNDROM_NETWORK;chr6q23;DAVICIONI_MOLECULAR_ARMS_VS_ERMS_UP;DODD_NASOPHARYNGEAL_CARCINOMA_UP;ENK_UV_RESPONSE_KERATINOCYTE_DN;ESC_V6.5_UP_LATE.V1_UP;ESTABLISHMENT_OF_CELLULAR_LOCALIZATION;ESTABLISHMENT_OF_LOCALIZATION;FEVR_CTNNB1_TARGETS_UP;GARY_CD5_TARGETS_DN;GEN…	Acetylation;Alternativesplicing;Coiledcoil;Completeproteome;Directproteinsequencing;Endosome;Membrane;Phosphoprotein;Referenceproteome;Transmembrane;Transmembranehelix
-0.171392	-0.896834	NaN	-1.42025	NaN	-1.40806	0.174553	-0.406978	-0.4507	-1.13934	-0.906693	-0.324799	-0.477215	NaN	-0.943915	0.0504303	0.0085872	-0.599384	0.12901	NaN	0.117164	-1.46381	-0.542427	NaN	-0.607513	-1.61777	-1.79793	NaN	NaN	NaN	-0.924675	NaN	-1.16226	0.31847	-0.477215	-0.924675	-0.44746	0.136739	S	2	___1	biological regulation;cellular component assembly;cellular component assembly at cellular level;cellular component organization;cellular component organization at cellular level;cellular component organization or biogenesis;cellular component organization or biogenesis at cellular level;cellular process;chromatin assembly;chromatin assembly or disassembly;chromatin modification;chromatin organiza…	binding;chromatin binding;DNA binding;nucleic acid binding;regulatory region DNA binding;regulatory region nucleic acid binding;sequence-specific DNA binding;transcription regulatory region DNA binding;transcription regulatory region sequence-specific DNA binding	cell part;chromatin;chromatin remodeling complex;chromatin silencing complex;chromosomal part;cytoplasm;cytoplasmic part;intracellular membrane-bounded organelle;intracellular organelle;intracellular organelle part;intracellular part;macromolecular complex;membrane;membrane-bounded organelle;mitochondrion;nuclear membrane;nuclear part;nucleoplasm;nucleus;organelle;organelle membrane;organelle par…	biological regulation;cellular component assembly;cellular component organization;cellular process;chromatin modification;chromatin organization;chromosome organization;gene silencing;organelle organization;regulation of gene expression, epigenetic	cell part;chromatin remodeling complex;cytoplasm;intracellular membrane-bounded organelle;intracellular organelle;macromolecular complex;membrane;mitochondrion;nucleoplasm;nucleus;organelle;protein complex		BAH	BAKKER_FOXO3_TARGETS_DN;CHARAFE_BREAST_CANCER_LUMINAL_VS_BASAL_UP;chr7p22;DCA_UP.V1_DN;DELACROIX_RAR_TARGETS_DN;DELACROIX_RARG_BOUND_MEF;DODD_NASOPHARYNGEAL_CARCINOMA_UP;GSE14308_NAIVE_CD4_TCELL_VS_NATURAL_TREG_UP;GSE14308_TH17_VS_NATURAL_TREG_DN;GSE17721_0.5H_VS_8H_GARDIQUIMOD_BMDM_DN;GSE17721_CTRL_VS_LPS_24H_BMDM_DN;GSE17721_LPS_VS_GARDIQUIMOD_24H_BMDM_UP;GSE17721_PAM3CSK4_VS_GADIQUIMOD_0.5H_BM…	Alternativesplicing;Coiledcoil;Completeproteome;Isopeptidebond;Phosphoprotein;Polymorphism;Referenceproteome;Ublconjugation
0.57582	NaN	-2.60951	NaN	NaN	NaN	0.411169	0.98534	-1.20077	0.392607	0.308807	0.284532	NaN	NaN	NaN	1.58529	1.26397	-0.691066	0.0133428	0.996519	NaN	NaN	-1.29927	0.200482	0.0700513	NaN	NaN	NaN	NaN	NaN	-0.780727	NaN	0.0102972	0.619498	0.392607	0.0133428	-0.379264	0.18226	S	3	___1	biological regulation;cellular component assembly;cellular component assembly at cellular level;cellular component organization;cellular component organization at cellular level;cellular component organization or biogenesis;cellular component organization or biogenesis at cellular level;cellular process;chromatin assembly;chromatin assembly or disassembly;chromatin modification;chromatin organiza…	binding;chromatin binding;DNA binding;nucleic acid binding;regulatory region DNA binding;regulatory region nucleic acid binding;sequence-specific DNA binding;transcription regulatory region DNA binding;transcription regulatory region sequence-specific DNA binding	cell part;chromatin;chromatin remodeling complex;chromatin silencing complex;chromosomal part;cytoplasm;cytoplasmic part;intracellular membrane-bounded organelle;intracellular organelle;intracellular organelle part;intracellular part;macromolecular complex;membrane;membrane-bounded organelle;mitochondrion;nuclear membrane;nuclear part;nucleoplasm;nucleus;organelle;organelle membrane;organelle par…	biological regulation;cellular component assembly;cellular component organization;cellular process;chromatin modification;chromatin organization;chromosome organization;gene silencing;organelle organization;regulation of gene expression, epigenetic	cell part;chromatin remodeling complex;cytoplasm;intracellular membrane-bounded organelle;intracellular organelle;macromolecular complex;membrane;mitochondrion;nucleoplasm;nucleus;organelle;protein complex		BAH	BAKKER_FOXO3_TARGETS_DN;CHARAFE_BREAST_CANCER_LUMINAL_VS_BASAL_UP;chr7p22;DCA_UP.V1_DN;DELACROIX_RAR_TARGETS_DN;DELACROIX_RARG_BOUND_MEF;DODD_NASOPHARYNGEAL_CARCINOMA_UP;GSE14308_NAIVE_CD4_TCELL_VS_NATURAL_TREG_UP;GSE14308_TH17_VS_NATURAL_TREG_DN;GSE17721_0.5H_VS_8H_GARDIQUIMOD_BMDM_DN;GSE17721_CTRL_VS_LPS_24H_BMDM_DN;GSE17721_LPS_VS_GARDIQUIMOD_24H_BMDM_UP;GSE17721_PAM3CSK4_VS_GADIQUIMOD_0.5H_BM…	Alternativesplicing;Coiledcoil;Completeproteome;Isopeptidebond;Phosphoprotein;Polymorphism;Referenceproteome;Ublconjugation
-0.959341	NaN	0.136712	1.14105	0.557185	0.35855	NaN	NaN	-0.35423	0.0205699	0.75581	0.292555	-0.256759	NaN	0.287138	NaN	NaN	-0.331951	NaN	NaN	NaN	NaN	NaN	-0.28272	-1.60071	0.183075	NaN	0.150773	NaN	-0.104282	0.590462	NaN	NaN	0.394822	0.211925	0.0232458	-0.188679	0.351768	S	2	___1	actin cytoskeleton organization;actin filament-based process;activation of immune response;activation of innate immune response;activation of protein kinase activity;activation of protein kinase B activity;anatomical structure development;antigen receptor-mediated signaling pathway;biological regulation;biosynthetic process;blood coagulation;calcium-mediated signaling;cell activation;cell communi…	3-phosphoinositide-dependent protein kinase activity;adenyl nucleotide binding;adenyl ribonucleotide binding;ATP binding;binding;catalytic activity;enzyme activator activity;enzyme binding;enzyme regulator activity;kinase activity;lipase activator activity;nucleotide binding;phospholipase activator activity;phospholipase binding;phosphotransferase activity, alcohol group as acceptor;protein bindi…	adherens junction;anchoring junction;cell junction;cell part;cell projection;cell-substrate adherens junction;cell-substrate junction;cytoplasm;cytoplasmic membrane-bounded vesicle;cytoplasmic part;cytoplasmic vesicle;cytosol;focal adhesion;intracellular membrane-bounded organelle;intracellular organelle;intracellular organelle part;intracellular part;membrane;membrane-bounded organelle;membrane-…	anatomical structure development;biological regulation;biosynthetic process;cell activation;cell communication;cell development;cell junction organization;cell motility;cell-cell signaling;cellular component assembly;cellular component movement;cellular component organization;cellular metabolic process;cellular nitrogen compound metabolic process;cellular process;coagulation;cytoskeleton organiza…	cell part;cell projection;cytoplasm;cytoplasmic membrane-bounded vesicle;cytosol;intracellular membrane-bounded organelle;intracellular organelle;membrane;nucleoplasm;organelle;plasma membrane;vesicle	Aldosterone-regulated sodium reabsorption;Endometrial cancer;Focal adhesion;Insulin signaling pathway;mTOR signaling pathway;Non-small cell lung cancer;PPAR signaling pathway;Prostate cancer	Pkinase	AACTGAC,MIR-223;ACAACTT,MIR-382;ACTGTGA,MIR-27A,MIR-27B;ACTIN_CYTOSKELETON_ORGANIZATION_AND_BIOGENESIS;ACTIN_FILAMENT_BASED_PROCESS;AGUIRRE_PANCREATIC_CANCER_COPY_NUMBER_DN;ATGTACA,MIR-493;BIOCARTA_AKT_PATHWAY;BIOCARTA_EIF4_PATHWAY;BIOCARTA_GSK3_PATHWAY;BIOCARTA_IGF1MTOR_PATHWAY;BIOCARTA_MTOR_PATHWAY;BIOCARTA_PTDINS_PATHWAY;BIOCARTA_PTEN_PATHWAY;BIOPOLYMER_METABOLIC_PROCESS;BIOPOLYMER_MODIFICATIO…	3D-structure;Acetylation;Activator;Alternativesplicing;ATP-binding;Celljunction;Cellmembrane;Completeproteome;Cytoplasm;Directproteinsequencing;Kinase;Membrane;Nucleotide-binding;Nucleus;Phosphoprotein;Referenceproteome;Serine/threonine-proteinkinase;Transcription;Transcriptionregulation;Transferase;Ublconjugation
NaN	NaN	-1.67207	NaN	-2.44836	-1.42107	NaN	NaN	NaN	-0.693706	-0.575026	-0.772528	NaN	NaN	-1.91393	NaN	-1.53719	-1.18127	-0.952597	-1.47128	NaN	NaN	-1.53866	0.335338	NaN	-1.25629	NaN	NaN	NaN	-1.8854	-0.481649	NaN	NaN	0.379291	-1.42107	-1.25629	0.164776	0.290331	S	2	___1		binding;cation binding;ion binding;metal ion binding;transition metal ion binding;zinc ion binding					zf-CCCH	BENPORATH_CYCLING_GENES;BROWNE_HCMV_INFECTION_6HR_DN;chrxq25;COLINA_TARGETS_OF_4EBP1_AND_4EBP2;DACOSTA_UV_RESPONSE_VIA_ERCC3_UP;GSE11924_TFH_VS_TH2_CD4_TCELL_DN;GSE12366_GC_BCELL_VS_PLASMA_CELL_DN;GSE13484_UNSTIM_VS_YF17D_VACCINE_STIM_PBMC_UP;GSE1460_CD4_THYMOCYTE_VS_NAIVE_CD4_TCELL_ADULT_BLOOD_DN;GSE15659_CD45RA_NEG_CD4_TCELL_VS_ACTIVATED_TREG_DN;GSE15659_NAIVE_CD4_TCELL_VS_ACTIVATED_TREG_DN;GSE…	Acetylation;Completeproteome;Metal-binding;Phosphoprotein;Referenceproteome;Zinc;Zinc-finger
NaN	1.33972	0.568739	1.17495	1.10443	1.3218	NaN	NaN	NaN	0.529395	1.18269	NaN	NaN	NaN	NaN	0.328289	NaN	NaN	NaN	NaN	NaN	NaN	NaN	NaN	NaN	1.56707	1.86097	-1.66577	NaN	NaN	NaN	2.02794	-0.351723	0.745752	1.13969	1.56707	0.427376	0.110257	S	2	___1	biological regulation;cellular process;cellular response to stimulus;defense response;immune response;immune system process;inflammatory response;innate immune response;intracellular receptor mediated signaling pathway;negative regulation of biological process;negative regulation of chemokine production;negative regulation of cytokine production;negative regulation of defense response;negative re…	actin binding;binding;cation binding;cytoskeletal protein binding;ion binding;metal ion binding;protein binding;transition metal ion binding;zinc ion binding	cell part;cell projection;cytoplasmic part;cytoskeletal part;cytosol;intracellular membrane-bounded organelle;intracellular organelle;intracellular organelle part;intracellular part;lamellipodium;macromolecular complex;membrane-bounded organelle;microtubule;microtubule associated complex;nucleus;organelle;organelle part;protein complex;ruffle	biological regulation;cellular process;immune system process;response to stimulus;response to stress;signal transduction	cell part;cell projection;cytosol;intracellular membrane-bounded organelle;intracellular organelle;macromolecular complex;nucleus;organelle;protein complex	NOD-like receptor signaling pathway	PRY;PYRIN;SPRY;zf-B_box	ACTIN_BINDING;ALTEMEIER_RESPONSE_TO_LPS_WITH_MECHANICAL_VENTILATION;CHEN_METABOLIC_SYNDROM_NETWORK;chr16p13;CHYLA_CBFA2T3_TARGETS_UP;CYTOSKELETAL_PART;CYTOSKELETAL_PROTEIN_BINDING;CYTOSKELETON;DEFENSE_RESPONSE;GSE10094_LCMV_VS_LISTERIA_IND_EFF_CD4_TCELL_DN;GSE14026_TH1_VS_TH17_UP;GSE17721_0.5H_VS_12H_CPG_BMDM_DN;GSE17721_12H_VS_24H_PAM3CSK4_BMDM_UP;GSE17721_CTRL_VS_GARDIQUIMOD_1H_BMDM_DN;GSE17721…	3D-structure;Actin-binding;Alternativesplicing;Amyloidosis;Cellprojection;Coiledcoil;Completeproteome;Cytoplasm;Cytoskeleton;Diseasemutation;Immunity;Inflammatoryresponse;Innateimmunity;Metal-binding;Microtubule;Nucleus;Polymorphism;Referenceproteome;Zinc;Zinc-finger
NaN	1.76287	0.722567	1.68643	NaN	1.5668	NaN	-1.70955	-1.23317	0.738258	1.87836	0.021888	NaN	NaN	-0.748068	0.660213	-1.02468	-1.82367	0.882915	0.364272	NaN	NaN	NaN	NaN	-1.55563	2.8292	2.3601	0.38333	-0.894776	-3.77592	0.577298	NaN	0.67641	0.991762	0.660213	0.480314	-0.179899	0.360805	S	2	___1	biological regulation;cellular process;cellular response to stimulus;defense response;immune response;immune system process;inflammatory response;innate immune response;intracellular receptor mediated signaling pathway;negative regulation of biological process;negative regulation of chemokine production;negative regulation of cytokine production;negative regulation of defense response;negative re…	actin binding;binding;cation binding;cytoskeletal protein binding;ion binding;metal ion binding;protein binding;transition metal ion binding;zinc ion binding	cell part;cell projection;cytoplasmic part;cytoskeletal part;cytosol;intracellular membrane-bounded organelle;intracellular organelle;intracellular organelle part;intracellular part;lamellipodium;macromolecular complex;membrane-bounded organelle;microtubule;microtubule associated complex;nucleus;organelle;organelle part;protein complex;ruffle	biological regulation;cellular process;immune system process;response to stimulus;response to stress;signal transduction	cell part;cell projection;cytosol;intracellular membrane-bounded organelle;intracellular organelle;macromolecular complex;nucleus;organelle;protein complex	NOD-like receptor signaling pathway	PRY;PYRIN;SPRY;zf-B_box	ACTIN_BINDING;ALTEMEIER_RESPONSE_TO_LPS_WITH_MECHANICAL_VENTILATION;CHEN_METABOLIC_SYNDROM_NETWORK;chr16p13;CHYLA_CBFA2T3_TARGETS_UP;CYTOSKELETAL_PART;CYTOSKELETAL_PROTEIN_BINDING;CYTOSKELETON;DEFENSE_RESPONSE;GSE10094_LCMV_VS_LISTERIA_IND_EFF_CD4_TCELL_DN;GSE14026_TH1_VS_TH17_UP;GSE17721_0.5H_VS_12H_CPG_BMDM_DN;GSE17721_12H_VS_24H_PAM3CSK4_BMDM_UP;GSE17721_CTRL_VS_GARDIQUIMOD_1H_BMDM_DN;GSE17721…	3D-structure;Actin-binding;Alternativesplicing;Amyloidosis;Cellprojection;Coiledcoil;Completeproteome;Cytoplasm;Cytoskeleton;Diseasemutation;Immunity;Inflammatoryresponse;Innateimmunity;Metal-binding;Microtubule;Nucleus;Polymorphism;Referenceproteome;Zinc;Zinc-finger
-1.27109	NaN	0.768471	NaN	-0.10127	0.738348	2.9341	0.764893	-1.00914	-0.212201	NaN	NaN	-0.262992	NaN	1.73113	NaN	NaN	-0.335551	1.90306	NaN	NaN	-0.0765233	NaN	-0.379366	0.701725	1.80876	NaN	0.31695	NaN	0.381665	NaN	NaN	NaN	0.523139	-0.10127	0.381665	0.482935	0.0857351	S	2	___1	actin cytoskeleton organization;actin cytoskeleton reorganization;actin filament-based process;biological regulation;cell surface receptor linked signaling pathway;cellular component organization;cellular component organization at cellular level;cellular component organization or biogenesis;cellular component organization or biogenesis at cellular level;cellular process;cellular response to stimu…	enzyme activator activity;enzyme regulator activity;GTPase activator activity;GTPase regulator activity;nucleoside-triphosphatase regulator activity	cell junction;cell part;cell projection;cell projection part;cytoplasm;cytoskeletal part;cytoskeleton;dendritic spine;intracellular non-membrane-bounded organelle;intracellular organelle;intracellular organelle part;intracellular part;membrane;neuron projection;neuron spine;non-membrane-bounded organelle;organelle;organelle part;postsynaptic density;postsynaptic membrane;synapse part;synaptic mem…	biological regulation;cellular component organization;cellular process;cytoskeleton organization;organelle organization;response to stimulus;signal transduction	cell part;cell projection;cytoplasm;cytoskeleton;intracellular non-membrane-bounded organelle;intracellular organelle;membrane;neuron projection;organelle		DUF3401;Rap_GAP	BROWNE_HCMV_INFECTION_12HR_DN;BROWNE_HCMV_INFECTION_20HR_DN;CASORELLI_ACUTE_PROMYELOCYTIC_LEUKEMIA_UP;CHEMNITZ_RESPONSE_TO_PROSTAGLANDIN_E2_DN;chr14q24;CTAWWWATA_V$RSRFC4_Q2;CUI_TCF21_TARGETS_2_UP;DACOSTA_UV_RESPONSE_VIA_ERCC3_DN;DOANE_RESPONSE_TO_ANDROGEN_DN;DODD_NASOPHARYNGEAL_CARCINOMA_UP;GENTILE_UV_LOW_DOSE_DN;GGATTA_V$PITX2_Q2;GSE10325_CD4_TCELL_VS_BCELL_DN;GSE11864_CSF1_VS_CSF1_IFNG_PAM3CYS…	Alternativesplicing;Celljunction;Cellmembrane;Coiledcoil;Completeproteome;Cytoplasm;Cytoskeleton;GTPaseactivation;Membrane;Phosphoprotein;Polymorphism;Postsynapticcellmembrane;Referenceproteome;Synapse;Synaptosome;Ublconjugation
0.147619	0.268694	0.236585	0.228636	0.176272	-0.0350717	0.033368	0.53528	0.301391	0.107789	0.219581	0.238576	0.561952	0.00244174	0.30034	0.408891	0.974597	0.179643	0.1221	0.382941	0.722206	0.038346	0.247508	0.271191	-0.0199274	-0.172679	-0.125014	0.554298	0.147185	-0.314286	0.39638	0.0768728	-0.102727	0.193659	0.23261	0.1221	-0.110511	0.434584	S	4	___1	biological regulation;cell cycle arrest;cell cycle process;cellular component assembly;cellular component assembly at cellular level;cellular component organization;cellular component organization at cellular level;cellular component organization or biogenesis;cellular component organization or biogenesis at cellular level;cellular macromolecular complex assembly;cellular macromolecular complex s…		Cajal body;catalytic step 2 spliceosome;cell part;cytoplasm;cytoplasmic part;cytosol;Golgi apparatus;intracellular membrane-bounded organelle;intracellular organelle;intracellular organelle part;intracellular part;macromolecular complex;membrane-bounded organelle;nuclear body;nuclear part;nucleoplasm;nucleoplasm part;organelle;organelle part;ribonucleoprotein complex;small nuclear ribonucleoprote…	biological regulation;cellular component assembly;cellular component organization;cellular macromolecular complex assembly;cellular metabolic process;cellular nitrogen compound metabolic process;cellular process;macromolecular complex assembly;macromolecule metabolic process;metabolic process;mRNA metabolic process;mRNA processing;nitrogen compound metabolic process;nucleobase-containing compound…	cell part;cytoplasm;cytosol;Golgi apparatus;intracellular membrane-bounded organelle;intracellular organelle;macromolecular complex;nucleoplasm;organelle;ribonucleoprotein complex;small nuclear ribonucleoprotein complex;spliceosomal complex	Spliceosome	SART-1	ANATOMICAL_STRUCTURE_DEVELOPMENT;BLALOCK_ALZHEIMERS_DISEASE_UP;CATRRAGC_UNKNOWN;CELL_ACTIVATION;CHEOK_RESPONSE_TO_MERCAPTOPURINE_AND_HD_MTX_DN;chr11q13;CYTOPLASM;CYTOPLASMIC_PART;CYTOSOL;GGGCGGR_V$SP1_Q6;GSE12845_NAIVE_VS_DARKZONE_GC_TONSIL_BCELL_DN;GSE13411_NAIVE_BCELL_VS_PLASMA_CELL_UP;GSE14000_TRANSLATED_RNA_VS_MRNA_4H_LPS_DC_UP;GSE14308_TH1_VS_INDUCED_TREG_UP;GSE1448_CTRL_VS_ANTI_VALPHA2_DP_T…	3D-structure;Allergen;Alternativesplicing;Coiledcoil;Completeproteome;mRNAprocessing;mRNAsplicing;Nucleus;Phosphoprotein;Polymorphism;Referenceproteome;Spliceosome;Ublconjugation
-0.538514	NaN	0.651399	0.721471	NaN	0.485918	NaN	0.141022	NaN	0.684554	0.814074	0.587778	0.830944	0.949477	0.139624	-0.19714	-0.868902	NaN	0.0910694	0.0903297	NaN	0.617169	-0.614659	0.404871	-0.173749	0.672566	0.6273	0.278721	NaN	0.15757	0.0218674	NaN	0.823575	0.656682	0.587778	0.218146	-0.369632	0.189378	S	2	___1	alcohol metabolic process;carbohydrate metabolic process;cellular carbohydrate metabolic process;cellular metabolic process;cellular process;inositol metabolic process;inositol phosphate metabolic process;metabolic process;organophosphate metabolic process;polyol metabolic process;primary metabolic process;small molecule metabolic process	acid phosphatase activity;adenyl nucleotide binding;adenyl ribonucleotide binding;ATP binding;binding;catalytic activity;diphosphoinositol-pentakisphosphate kinase activity;hydrolase activity;hydrolase activity, acting on ester bonds;inositol 1,3,4,5,6-pentakisphosphate kinase activity;inositol hexakisphosphate 1-kinase activity;inositol hexakisphosphate 3-kinase activity;inositol hexakisphosphat…	cell part;cytoplasmic part;cytosol;intracellular part	alcohol metabolic process;carbohydrate metabolic process;cellular metabolic process;cellular process;metabolic process;primary metabolic process;small molecule metabolic process	cell part;cytosol		His_Phos_2	ATGCTGC,MIR-103,MIR-107;chr5q21;CUI_TCF21_TARGETS_2_DN;DACOSTA_UV_RESPONSE_VIA_ERCC3_DN;DAZARD_RESPONSE_TO_UV_NHEK_DN;GRABARCZYK_BCL11B_TARGETS_UP;GSE13484_UNSTIM_VS_YF17D_VACCINE_STIM_PBMC_UP;GSE14308_INDUCED_VS_NATURAL_TREG_DN;GSE20366_EX_VIVO_VS_DEC205_CONVERSION_UP;GSE22886_IGG_IGA_MEMORY_BCELL_VS_BLOOD_PLASMA_CELL_DN;GSE22886_IGM_MEMORY_BCELL_VS_BLOOD_PLASMA_CELL_DN;GSE28237_EARLY_VS_LATE_GC…	3D-structure;Alternativesplicing;ATP-binding;Completeproteome;Cytoplasm;Kinase;Nucleotide-binding;Phosphoprotein;Polymorphism;Referenceproteome;Transferase
1.54215	-2.95685	-1.76551	-0.462519	-2.31452	-1.35675	0.980762	NaN	NaN	NaN	NaN	-0.863193	NaN	NaN	NaN	NaN	NaN	-0.583704	-1.42188	1.75497	NaN	NaN	-2.17554	-0.479155	-0.316003	0.545953	0.923428	NaN	NaN	0.889378	-2.75603	NaN	NaN	0.464578	-0.863193	-0.316003	0.54719	0.0627481	S	2	___1	alcohol metabolic process;carbohydrate metabolic process;cellular carbohydrate metabolic process;cellular metabolic process;cellular process;inositol metabolic process;inositol phosphate metabolic process;metabolic process;organophosphate metabolic process;polyol metabolic process;primary metabolic process;small molecule metabolic process	acid phosphatase activity;adenyl nucleotide binding;adenyl ribonucleotide binding;ATP binding;binding;catalytic activity;diphosphoinositol-pentakisphosphate kinase activity;hydrolase activity;hydrolase activity, acting on ester bonds;inositol 1,3,4,5,6-pentakisphosphate kinase activity;inositol hexakisphosphate 1-kinase activity;inositol hexakisphosphate 3-kinase activity;inositol hexakisphosphat…	cell part;cytoplasmic part;cytosol;intracellular part	alcohol metabolic process;carbohydrate metabolic process;cellular metabolic process;cellular process;metabolic process;primary metabolic process;small molecule metabolic process	cell part;cytosol		His_Phos_2	ATGCTGC,MIR-103,MIR-107;chr5q21;CUI_TCF21_TARGETS_2_DN;DACOSTA_UV_RESPONSE_VIA_ERCC3_DN;DAZARD_RESPONSE_TO_UV_NHEK_DN;GRABARCZYK_BCL11B_TARGETS_UP;GSE13484_UNSTIM_VS_YF17D_VACCINE_STIM_PBMC_UP;GSE14308_INDUCED_VS_NATURAL_TREG_DN;GSE20366_EX_VIVO_VS_DEC205_CONVERSION_UP;GSE22886_IGG_IGA_MEMORY_BCELL_VS_BLOOD_PLASMA_CELL_DN;GSE22886_IGM_MEMORY_BCELL_VS_BLOOD_PLASMA_CELL_DN;GSE28237_EARLY_VS_LATE_GC…	3D-structure;Alternativesplicing;ATP-binding;Completeproteome;Cytoplasm;Kinase;Nucleotide-binding;Phosphoprotein;Polymorphism;Referenceproteome;Transferase
NaN	0.305542	-0.695911	0.599373	-0.42325	0.14292	-0.832397	-1.15605	-0.638429	0.109528	-0.0801355	-0.198878	-0.252185	0.309593	-0.358342	-1.00077	-1.79468	-0.732682	-0.162186	-1.40067	-0.515107	0.102536	-0.472923	-0.445908	-0.13724	1.13256	1.01442	-0.760458	0.700039	0.682393	-0.765333	NaN	0.325155	0.178906	-0.358342	-0.149713	0.208629	0.253101	S	2	___1	activation of immune response;activation of innate immune response;activation of MAPK activity;activation of MAPKK activity;activation of NF-kappaB-inducing kinase activity;activation of protein kinase activity;anatomical structure formation involved in morphogenesis;angiogenesis;antigen receptor-mediated signaling pathway;apoptosis;biological regulation;biosynthetic process;cell death;cell surfa…	adenyl nucleotide binding;adenyl ribonucleotide binding;ATP binding;binding;catalytic activity;cation binding;ion binding;kinase activity;magnesium ion binding;MAP kinase kinase activity;MAP kinase kinase kinase activity;metal ion binding;molecular transducer activity;nucleotide binding;phosphotransferase activity, alcohol group as acceptor;protein binding;protein kinase activity;protein serine/t…	Ada2/Gcn5/Ada3 transcription activator complex;cell part;cytoplasm;cytoplasmic part;cytosol;endosomal part;endosome membrane;histone acetyltransferase complex;intracellular membrane-bounded organelle;intracellular organelle;intracellular organelle part;intracellular part;macromolecular complex;membrane;membrane-bounded organelle;nuclear part;nucleoplasm;nucleoplasm part;nucleus;organelle;organell…	anatomical structure formation involved in morphogenesis;biological regulation;biosynthetic process;cell death;cellular component organization;cellular metabolic process;cellular nitrogen compound metabolic process;cellular process;chromatin modification;chromatin organization;chromosome organization;death;developmental process;histone modification;immune system process;macromolecule metabolic pr…	cell part;cytoplasm;cytosol;intracellular membrane-bounded organelle;intracellular organelle;macromolecular complex;membrane;nucleoplasm;nucleus;organelle;plasma membrane;protein complex	Adherens junction;Leishmaniasis;MAPK signaling pathway;Measles;NOD-like receptor signaling pathway;Osteoclast differentiation;RIG-I-like receptor signaling pathway;T cell receptor signaling pathway;Toll-like receptor signaling pathway;Toxoplasmosis;Wnt signaling pathway	Pkinase_Tyr	ACAGGGT,MIR-10A,MIR-10B;ACTIVATION_OF_PROTEIN_KINASE_ACTIVITY;ADAPTIVE_IMMUNE_RESPONSE;ADAPTIVE_IMMUNE_RESPONSE_GO_0002460;AGGCACT,MIR-515-3P;BIOCARTA_ALK_PATHWAY;BIOCARTA_FAS_PATHWAY;BIOCARTA_IL1R_PATHWAY;BIOCARTA_MAPK_PATHWAY;BIOCARTA_NFKB_PATHWAY;BIOCARTA_NTHI_PATHWAY;BIOCARTA_P38MAPK_PATHWAY;BIOCARTA_PAR1_PATHWAY;BIOCARTA_TGFB_PATHWAY;BIOCARTA_TNFR1_PATHWAY;BIOCARTA_TOLL_PATHWAY;BIOCARTA_WNT_…	3D-structure;Alternativesplicing;Apoptosis;ATP-binding;Cellmembrane;Completeproteome;Cytoplasm;Isopeptidebond;Kinase;Magnesium;Membrane;Metal-binding;Nucleotide-binding;Phosphoprotein;Referenceproteome;Serine/threonine-proteinkinase;Stressresponse;Transcription;Transcriptionregulation;Transferase;Ublconjugation
-1.12357	0.0729105	-0.535068	0.41535	-0.520811	0.213234	-0.828961	-1.8956	-0.842544	-0.364515	-0.150025	-0.409338	-0.664438	-0.0779618	-0.499456	-1.37947	-1.62601	-0.0881815	-0.246495	-0.817023	-1.00721	-0.606954	-0.733779	-0.234271	-0.153369	0.611988	0.624533	-0.786898	0.384175	0.406639	-0.646332	-0.520734	0.540915	0.0977104	-0.510133	-0.246495	0.263638	0.210211	S	2	___1	activation of immune response;activation of innate immune response;activation of MAPK activity;activation of MAPKK activity;activation of NF-kappaB-inducing kinase activity;activation of protein kinase activity;anatomical structure formation involved in morphogenesis;angiogenesis;antigen receptor-mediated signaling pathway;apoptosis;biological regulation;biosynthetic process;cell death;cell surfa…	adenyl nucleotide binding;adenyl ribonucleotide binding;ATP binding;binding;catalytic activity;cation binding;ion binding;kinase activity;magnesium ion binding;MAP kinase kinase activity;MAP kinase kinase kinase activity;metal ion binding;molecular transducer activity;nucleotide binding;phosphotransferase activity, alcohol group as acceptor;protein binding;protein kinase activity;protein serine/t…	Ada2/Gcn5/Ada3 transcription activator complex;cell part;cytoplasm;cytoplasmic part;cytosol;endosomal part;endosome membrane;histone acetyltransferase complex;intracellular membrane-bounded organelle;intracellular organelle;intracellular organelle part;intracellular part;macromolecular complex;membrane;membrane-bounded organelle;nuclear part;nucleoplasm;nucleoplasm part;nucleus;organelle;organell…	anatomical structure formation involved in morphogenesis;biological regulation;biosynthetic process;cell death;cellular component organization;cellular metabolic process;cellular nitrogen compound metabolic process;cellular process;chromatin modification;chromatin organization;chromosome organization;death;developmental process;histone modification;immune system process;macromolecule metabolic pr…	cell part;cytoplasm;cytosol;intracellular membrane-bounded organelle;intracellular organelle;macromolecular complex;membrane;nucleoplasm;nucleus;organelle;plasma membrane;protein complex	Adherens junction;Leishmaniasis;MAPK signaling pathway;Measles;NOD-like receptor signaling pathway;Osteoclast differentiation;RIG-I-like receptor signaling pathway;T cell receptor signaling pathway;Toll-like receptor signaling pathway;Toxoplasmosis;Wnt signaling pathway	Pkinase_Tyr	ACAGGGT,MIR-10A,MIR-10B;ACTIVATION_OF_PROTEIN_KINASE_ACTIVITY;ADAPTIVE_IMMUNE_RESPONSE;ADAPTIVE_IMMUNE_RESPONSE_GO_0002460;AGGCACT,MIR-515-3P;BIOCARTA_ALK_PATHWAY;BIOCARTA_FAS_PATHWAY;BIOCARTA_IL1R_PATHWAY;BIOCARTA_MAPK_PATHWAY;BIOCARTA_NFKB_PATHWAY;BIOCARTA_NTHI_PATHWAY;BIOCARTA_P38MAPK_PATHWAY;BIOCARTA_PAR1_PATHWAY;BIOCARTA_TGFB_PATHWAY;BIOCARTA_TNFR1_PATHWAY;BIOCARTA_TOLL_PATHWAY;BIOCARTA_WNT_…	3D-structure;Alternativesplicing;Apoptosis;ATP-binding;Cellmembrane;Completeproteome;Cytoplasm;Isopeptidebond;Kinase;Magnesium;Membrane;Metal-binding;Nucleotide-binding;Phosphoprotein;Referenceproteome;Serine/threonine-proteinkinase;Stressresponse;Transcription;Transcriptionregulation;Transferase;Ublconjugation
NaN	NaN	-0.223652	-0.19564	0.242041	-0.786646	-0.0142078	0.376325	0.349299	0.242052	NaN	-0.670532	NaN	NaN	-0.498208	0.350235	0.794621	-0.909242	1.27319	0.268454	0.83296	NaN	-1.2433	-0.308462	NaN	-0.206595	NaN	-0.162944	-0.00282254	-0.127812	0.300302	1.08552	NaN	0.392453	-0.0142078	-0.00282254	0.0113852	0.436656	S	2	___1	assembly of spliceosomal tri-snRNP;cellular component assembly;cellular component assembly at cellular level;cellular component organization;cellular component organization at cellular level;cellular component organization or biogenesis;cellular component organization or biogenesis at cellular level;cellular macromolecular complex assembly;cellular macromolecular complex subunit organization;cell…	binding;identical protein binding;protein binding	Cajal body;cell part;cytoplasm;intracellular membrane-bounded organelle;intracellular organelle;intracellular organelle part;intracellular part;macromolecular complex;membrane-bounded organelle;nuclear body;nuclear part;nuclear speck;nucleoplasm;nucleoplasm part;nucleus;organelle;organelle part;ribonucleoprotein complex;small nuclear ribonucleoprotein complex;spliceosomal complex;U4/U6 x U5 tri-s…	cellular component assembly;cellular component organization;cellular macromolecular complex assembly;cellular metabolic process;cellular nitrogen compound metabolic process;cellular process;macromolecular complex assembly;macromolecule metabolic process;metabolic process;mRNA metabolic process;mRNA processing;nitrogen compound metabolic process;nucleobase-containing compound metabolic process;pri…	cell part;cytoplasm;intracellular membrane-bounded organelle;intracellular organelle;macromolecular complex;nucleoplasm;nucleus;organelle;ribonucleoprotein complex;small nuclear ribonucleoprotein complex;spliceosomal complex	Spliceosome	DUF1115;PRP3;PWI	AACTTT_UNKNOWN;ACEVEDO_LIVER_CANCER_UP;AGTCAGC,MIR-345;BASAKI_YBX1_TARGETS_UP;BIOPOLYMER_METABOLIC_PROCESS;BROWNE_HCMV_INFECTION_14HR_UP;BRUINS_UVC_RESPONSE_VIA_TP53_GROUP_D;CHEN_HOXA5_TARGETS_9HR_UP;CHIBA_RESPONSE_TO_TSA;chr1q21;ENK_UV_RESPONSE_KERATINOCYTE_UP;GAUSSMANN_MLL_AF4_FUSION_TARGETS_A_UP;GGAANCGGAANY_UNKNOWN;GGGCGGR_V$SP1_Q6;GSE13411_SWITCHED_MEMORY_BCELL_VS_PLASMA_CELL_UP;GSE14000_UNS…	3D-structure;Alternativesplicing;Completeproteome;Directproteinsequencing;Diseasemutation;mRNAprocessing;mRNAsplicing;Nucleus;Phosphoprotein;Polymorphism;Referenceproteome;Retinitispigmentosa;Spliceosome;Ublconjugation
-1.97661	-0.778739	-1.34901	0.660451	-1.0115	0.0011314	-2.0057	-0.988803	-2.32465	-1.01446	-1.25954	-2.13635	-1.97503	-0.762884	-0.855041	-1.24217	-2.25622	-1.91286	0.12339	-0.595779	-1.49933	-0.323514	-0.549245	-1.13921	0.308935	-0.662187	-0.20897	-0.340141	-1.10774	-1.33107	0.212498	-0.433622	-0.688608	0.00394133	-1.25086	-0.549245	0.701613	0.0269452	S	2	___1	biological regulation;regulation of biological process;regulation of cell proliferation;regulation of cellular process	binding;identical protein binding;protein binding;protein dimerization activity;protein heterodimerization activity;protein homodimerization activity	cell part;cytoplasm;cytoplasmic part;intracellular part;perinuclear region of cytoplasm	biological regulation	cell part;cytoplasm		TPD52	AGUIRRE_PANCREATIC_CANCER_COPY_NUMBER_UP;BLALOCK_ALZHEIMERS_DISEASE_UP;BOYAULT_LIVER_CANCER_SUBCLASS_G3_UP;BROWNE_HCMV_INFECTION_20HR_DN;CAGCTTT,MIR-320;CAIRO_HEPATOBLASTOMA_CLASSES_UP;chr20q13;ENK_UV_RESPONSE_EPIDERMIS_UP;GGGCGGR_V$SP1_Q6;GRAESSMANN_APOPTOSIS_BY_DOXORUBICIN_DN;GSE10239_KLRG1INT_VS_KLRG1HIGH_EFF_CD8_TCELL_UP;GSE10325_LUPUS_BCELL_VS_LUPUS_MYELOID_DN;GSE10325_LUPUS_CD4_TCELL_VS_LUP…	Acetylation;Alternativesplicing;Coiledcoil;Completeproteome;Phosphoprotein;Referenceproteome
NaN	-1.98657	NaN	NaN	-3.23938	NaN	-2.10082	-2.39274	-3.18071	-3.65409	-2.2194	-3.0765	NaN	-3.20649	-2.47335	-2.34311	-1.81242	NaN	-0.891412	-1.46261	-2.00221	NaN	-1.00652	NaN	NaN	-3.15962	NaN	-2.2697	-1.70795	NaN	-2.85381	-2.99109	NaN	0.0901788	-2.43305	-2.00221	0.430838	0.108596	S	2	___1	biological regulation;regulation of biological process;regulation of cell proliferation;regulation of cellular process	binding;identical protein binding;protein binding;protein dimerization activity;protein heterodimerization activity;protein homodimerization activity	cell part;cytoplasm;cytoplasmic part;intracellular part;perinuclear region of cytoplasm	biological regulation	cell part;cytoplasm		TPD52	AGUIRRE_PANCREATIC_CANCER_COPY_NUMBER_UP;BLALOCK_ALZHEIMERS_DISEASE_UP;BOYAULT_LIVER_CANCER_SUBCLASS_G3_UP;BROWNE_HCMV_INFECTION_20HR_DN;CAGCTTT,MIR-320;CAIRO_HEPATOBLASTOMA_CLASSES_UP;chr20q13;ENK_UV_RESPONSE_EPIDERMIS_UP;GGGCGGR_V$SP1_Q6;GRAESSMANN_APOPTOSIS_BY_DOXORUBICIN_DN;GSE10239_KLRG1INT_VS_KLRG1HIGH_EFF_CD8_TCELL_UP;GSE10325_LUPUS_BCELL_VS_LUPUS_MYELOID_DN;GSE10325_LUPUS_CD4_TCELL_VS_LUP…	Acetylation;Alternativesplicing;Coiledcoil;Completeproteome;Phosphoprotein;Referenceproteome
-0.234884	NaN	NaN	NaN	0.289734	1.17221	NaN	NaN	NaN	NaN	NaN	-0.44344	NaN	0.92218	NaN	NaN	NaN	NaN	NaN	0.252666	-1.63523	-1.22935	NaN	NaN	NaN	NaN	NaN	NaN	0.787173	NaN	1.8573	-0.680116	0.630585	0.556023	0.289734	0.252666	-0.0370679	0.485911	S	3	___1	biological regulation;regulation of biological process;regulation of cell proliferation;regulation of cellular process	binding;identical protein binding;protein binding;protein dimerization activity;protein heterodimerization activity;protein homodimerization activity	cell part;cytoplasm;cytoplasmic part;intracellular part;perinuclear region of cytoplasm	biological regulation	cell part;cytoplasm		TPD52	AGUIRRE_PANCREATIC_CANCER_COPY_NUMBER_UP;BLALOCK_ALZHEIMERS_DISEASE_UP;BOYAULT_LIVER_CANCER_SUBCLASS_G3_UP;BROWNE_HCMV_INFECTION_20HR_DN;CAGCTTT,MIR-320;CAIRO_HEPATOBLASTOMA_CLASSES_UP;chr20q13;ENK_UV_RESPONSE_EPIDERMIS_UP;GGGCGGR_V$SP1_Q6;GRAESSMANN_APOPTOSIS_BY_DOXORUBICIN_DN;GSE10239_KLRG1INT_VS_KLRG1HIGH_EFF_CD8_TCELL_UP;GSE10325_LUPUS_BCELL_VS_LUPUS_MYELOID_DN;GSE10325_LUPUS_CD4_TCELL_VS_LUP…	Acetylation;Alternativesplicing;Coiledcoil;Completeproteome;Phosphoprotein;Referenceproteome
NaN	NaN	NaN	NaN	0.234763	1.04322	NaN	-0.808932	NaN	-0.451166	0.714833	-0.436424	NaN	NaN	0.398291	NaN	NaN	NaN	1.03161	NaN	NaN	NaN	0.167508	NaN	0.890287	1.55598	NaN	1.29068	NaN	NaN	0.569341	-0.578297	0.552748	0.119773	0.234763	0.729814	0.495051	0.0809763	S	2	___1	biological regulation;regulation of biological process;regulation of cell proliferation;regulation of cellular process	binding;identical protein binding;protein binding;protein dimerization activity;protein heterodimerization activity;protein homodimerization activity	cell part;cytoplasm;cytoplasmic part;intracellular part;perinuclear region of cytoplasm	biological regulation	cell part;cytoplasm		TPD52	AGUIRRE_PANCREATIC_CANCER_COPY_NUMBER_UP;BLALOCK_ALZHEIMERS_DISEASE_UP;BOYAULT_LIVER_CANCER_SUBCLASS_G3_UP;BROWNE_HCMV_INFECTION_20HR_DN;CAGCTTT,MIR-320;CAIRO_HEPATOBLASTOMA_CLASSES_UP;chr20q13;ENK_UV_RESPONSE_EPIDERMIS_UP;GGGCGGR_V$SP1_Q6;GRAESSMANN_APOPTOSIS_BY_DOXORUBICIN_DN;GSE10239_KLRG1INT_VS_KLRG1HIGH_EFF_CD8_TCELL_UP;GSE10325_LUPUS_BCELL_VS_LUPUS_MYELOID_DN;GSE10325_LUPUS_CD4_TCELL_VS_LUP…	Acetylation;Alternativesplicing;Coiledcoil;Completeproteome;Phosphoprotein;Referenceproteome
-3.68052	-1.39002	NaN	-0.965703	-1.70041	-1.30619	-1.23344	NaN	-1.69911	-1.61843	-1.22789	-1.81273	NaN	NaN	NaN	NaN	NaN	-1.04676	NaN	-1.49723	NaN	NaN	-1.71865	-1.43737	-0.968422	-1.61416	NaN	-1.20269	NaN	-1.48977	-2.80044	NaN	-0.277044	0.614082	-1.39002	-1.48977	-0.0997485	0.446306	S	3	___1	biological regulation;cell surface receptor linked signaling pathway;cellular process;cellular response to chemical stimulus;cellular response to cytokine stimulus;cellular response to organic substance;cellular response to stimulus;cytokine-mediated signaling pathway;posttranscriptional regulation of gene expression;regulation of biological process;regulation of biosynthetic process;regulation o…	binding;nucleic acid binding;RNA binding;RNA cap binding;translation factor activity, nucleic acid binding;translation initiation factor activity	cell part;cytoplasmic part;cytosol;eukaryotic translation initiation factor 4F complex;intracellular part;macromolecular complex;protein complex	biological regulation;cellular process;regulation of translation;response to chemical stimulus;response to stimulus;signal transduction;viral reproduction	cell part;cytosol;macromolecular complex;protein complex	RNA transport;Viral myocarditis	MA3;MIF4G;W2	ACAACTT,MIR-382;BIOCARTA_EIF_PATHWAY;BIOCARTA_EIF4_PATHWAY;BIOCARTA_MTOR_PATHWAY;BIOSYNTHETIC_PROCESS;CELLULAR_BIOSYNTHETIC_PROCESS;CELLULAR_COMPONENT_ASSEMBLY;CELLULAR_MACROMOLECULE_METABOLIC_PROCESS;CELLULAR_PROTEIN_METABOLIC_PROCESS;chr1p36;CTTGTAT,MIR-381;CYTOPLASM;CYTOPLASMIC_PART;DACOSTA_UV_RESPONSE_VIA_ERCC3_COMMON_DN;DACOSTA_UV_RESPONSE_VIA_ERCC3_DN;ENK_UV_RESPONSE_EPIDERMIS_DN;FORTSCHEGG…	3D-structure;Alternativesplicing;Coiledcoil;Completeproteome;Host-virusinteraction;Initiationfactor;Phosphoprotein;Polymorphism;Proteinbiosynthesis;Referenceproteome;Repeat;RNA-binding;Translationregulation
-0.656588	-0.983821	-0.963108	-0.24103	-0.327738	NaN	-0.552466	-2.27001	-1.0567	-0.393532	NaN	NaN	-1.52657	NaN	-2.11855	-0.541396	-1.74828	-0.628663	-0.0644283	-1.15057	NaN	NaN	-1.12879	-0.815989	-1.11831	-0.364022	NaN	-1.50137	NaN	NaN	NaN	NaN	0.0472762	0.386806	-0.809848	-0.967149	-0.157301	0.384413	S	3	___1	biological regulation;cell surface receptor linked signaling pathway;cellular process;cellular response to chemical stimulus;cellular response to cytokine stimulus;cellular response to organic substance;cellular response to stimulus;cytokine-mediated signaling pathway;posttranscriptional regulation of gene expression;regulation of biological process;regulation of biosynthetic process;regulation o…	binding;nucleic acid binding;RNA binding;RNA cap binding;translation factor activity, nucleic acid binding;translation initiation factor activity	cell part;cytoplasmic part;cytosol;eukaryotic translation initiation factor 4F complex;intracellular part;macromolecular complex;protein complex	biological regulation;cellular process;regulation of translation;response to chemical stimulus;response to stimulus;signal transduction;viral reproduction	cell part;cytosol;macromolecular complex;protein complex	RNA transport;Viral myocarditis	MA3;MIF4G;W2	ACAACTT,MIR-382;BIOCARTA_EIF_PATHWAY;BIOCARTA_EIF4_PATHWAY;BIOCARTA_MTOR_PATHWAY;BIOSYNTHETIC_PROCESS;CELLULAR_BIOSYNTHETIC_PROCESS;CELLULAR_COMPONENT_ASSEMBLY;CELLULAR_MACROMOLECULE_METABOLIC_PROCESS;CELLULAR_PROTEIN_METABOLIC_PROCESS;chr1p36;CTTGTAT,MIR-381;CYTOPLASM;CYTOPLASMIC_PART;DACOSTA_UV_RESPONSE_VIA_ERCC3_COMMON_DN;DACOSTA_UV_RESPONSE_VIA_ERCC3_DN;ENK_UV_RESPONSE_EPIDERMIS_DN;FORTSCHEGG…	3D-structure;Alternativesplicing;Coiledcoil;Completeproteome;Host-virusinteraction;Initiationfactor;Phosphoprotein;Polymorphism;Proteinbiosynthesis;Referenceproteome;Repeat;RNA-binding;Translationregulation
0.00627335	-1.96595	-1.14016	0.0619057	-0.153659	-0.108857	-0.203632	-1.52307	-0.667985	0.10387	-0.198283	-1.11035	-1.51728	NaN	-0.604726	-0.299955	-1.40549	-0.335828	0.685656	-0.523715	-1.43203	-0.617484	-0.898431	-0.95707	-1.05977	-0.167838	NaN	-1.36385	0.692637	-0.449492	-1.60781	NaN	0.220161	0.777777	-0.335828	-0.617484	-0.281656	0.261973	S	2	___1	biological regulation;cell surface receptor linked signaling pathway;cellular process;cellular response to chemical stimulus;cellular response to cytokine stimulus;cellular response to organic substance;cellular response to stimulus;cytokine-mediated signaling pathway;posttranscriptional regulation of gene expression;regulation of biological process;regulation of biosynthetic process;regulation o…	binding;nucleic acid binding;RNA binding;RNA cap binding;translation factor activity, nucleic acid binding;translation initiation factor activity	cell part;cytoplasmic part;cytosol;eukaryotic translation initiation factor 4F complex;intracellular part;macromolecular complex;protein complex	biological regulation;cellular process;regulation of translation;response to chemical stimulus;response to stimulus;signal transduction;viral reproduction	cell part;cytosol;macromolecular complex;protein complex	RNA transport;Viral myocarditis	MA3;MIF4G;W2	ACAACTT,MIR-382;BIOCARTA_EIF_PATHWAY;BIOCARTA_EIF4_PATHWAY;BIOCARTA_MTOR_PATHWAY;BIOSYNTHETIC_PROCESS;CELLULAR_BIOSYNTHETIC_PROCESS;CELLULAR_COMPONENT_ASSEMBLY;CELLULAR_MACROMOLECULE_METABOLIC_PROCESS;CELLULAR_PROTEIN_METABOLIC_PROCESS;chr1p36;CTTGTAT,MIR-381;CYTOPLASM;CYTOPLASMIC_PART;DACOSTA_UV_RESPONSE_VIA_ERCC3_COMMON_DN;DACOSTA_UV_RESPONSE_VIA_ERCC3_DN;ENK_UV_RESPONSE_EPIDERMIS_DN;FORTSCHEGG…	3D-structure;Alternativesplicing;Coiledcoil;Completeproteome;Host-virusinteraction;Initiationfactor;Phosphoprotein;Polymorphism;Proteinbiosynthesis;Referenceproteome;Repeat;RNA-binding;Translationregulation
-1.30875	NaN	-2.38557	-1.50408	NaN	-2.24422	-1.0928	-2.29945	-2.29455	-1.73181	-0.873661	-0.16928	-5.29293	NaN	-3.21622	NaN	-2.10855	-4.70087	NaN	-1.76982	-2.9621	-3.31709	-0.362331	-1.53917	-3.17142	NaN	-0.0727325	-0.758949	-1.33691	-1.18023	-2.21644	NaN	-0.75968	0.225641	-2.17639	-1.43804	0.738349	0.0215971	S	4	___1	actin cytoskeleton organization;actin filament-based process;cellular component organization;cellular component organization at cellular level;cellular component organization or biogenesis;cellular component organization or biogenesis at cellular level;cellular process;cortical actin cytoskeleton organization;cortical cytoskeleton organization;cytoskeleton organization;organelle organization	structural molecule activity	adherens junction;anchoring junction;cell cortex part;cell junction;cell part;cell-substrate adherens junction;cell-substrate junction;cytoplasmic part;cytoskeletal part;extracellular membrane-bounded organelle;extracellular organelle;extracellular region part;extracellular vesicular exosome;extrinsic to membrane;focal adhesion;intracellular membrane-bounded organelle;intracellular organelle;intr…	cellular component organization;cellular process;cytoskeleton organization;organelle organization	cell part;extracellular organelle;intracellular membrane-bounded organelle;intracellular organelle;membrane;nucleoplasm;nucleus;organelle;plasma membrane;vesicle	Tight junction	4_1_CTD;FA;FERM_C;FERM_M;FERM_N;SAB	ACTIN_CYTOSKELETON;BASSO_HAIRY_CELL_LEUKEMIA_DN;BROCKE_APOPTOSIS_REVERSED_BY_IL6;BRUECKNER_TARGETS_OF_MIRLET7A3_DN;CASORELLI_ACUTE_PROMYELOCYTIC_LEUKEMIA_DN;CELL_CORTEX;CELL_CORTEX_PART;CHARAFE_BREAST_CANCER_LUMINAL_VS_MESENCHYMAL_DN;CHEN_METABOLIC_SYNDROM_NETWORK;CHICAS_RB1_TARGETS_CONFLUENT;chr6q23;CORTICAL_ACTIN_CYTOSKELETON;CORTICAL_CYTOSKELETON;CREIGHTON_ENDOCRINE_THERAPY_RESISTANCE_5;CYTOPL…	Acetylation;Actin-binding;Alternativesplicing;Cellmembrane;Completeproteome;Cytoplasm;Cytoskeleton;Directproteinsequencing;Membrane;Phosphoprotein;Polymorphism;Referenceproteome
-1.27141	-0.977242	-1.93108	-0.420125	-1.79808	-1.28122	-1.85469	-0.396407	-0.784583	-0.952502	-1.74612	NaN	0.434801	NaN	1.53639	-2.07586	-0.787741	NaN	-1.16341	-0.320043	0.225163	-1.86998	-1.17448	-0.40546	-0.712878	-0.138856	-1.23805	-0.693311	0.968416	NaN	-0.808539	-0.0825961	0.343555	0.174592	-0.977242	-0.549385	0.427857	0.110025	S	2	___1	actin cytoskeleton organization;actin filament-based process;anatomical structure formation involved in morphogenesis;anatomical structure morphogenesis;apoptosis;biological regulation;blood circulation;cell death;cell junction assembly;cell junction organization;cell part morphogenesis;cell projection morphogenesis;cell projection organization;cell-cell junction assembly;cell-cell junction organ…	1-phosphatidylinositol binding;binding;cytoskeletal protein binding;lipid binding;phosphatidylinositol binding;phospholipid binding;protein binding;spectrin binding;structural constituent of cytoskeleton;structural molecule activity	adherens junction;anchoring junction;axolemma;axon part;cell cortex part;cell junction;cell part;cell projection membrane;cell projection part;cell-cell junction;cell-substrate adherens junction;cell-substrate junction;cortical cytoskeleton;cytoplasm;cytoplasmic part;cytoskeletal part;cytoskeleton;extracellular membrane-bounded organelle;extracellular organelle;extracellular region part;extracell…	anatomical structure formation involved in morphogenesis;anatomical structure morphogenesis;biological regulation;blood circulation;cell death;cell junction organization;cellular component assembly;cellular component morphogenesis;cellular component organization;cellular localization;cellular membrane organization;cellular process;circulatory system process;cytoskeleton organization;death;develop…	cell part;cytoplasm;cytoskeleton;extracellular organelle;Golgi apparatus;intracellular membrane-bounded organelle;intracellular non-membrane-bounded organelle;intracellular organelle;macromolecular complex;membrane;nucleoplasm;nucleus;organelle;plasma membrane;protein complex;vesicle	Tight junction	4_1_CTD;FA;FERM_C;FERM_M;FERM_N;SAB	AAAYWAACM_V$HFH4_01;AACTGAC,MIR-223;AACTTT_UNKNOWN;AAGTCCA,MIR-422B,MIR-422A;ACTGTGA,MIR-27A,MIR-27B;ACTIN_CYTOSKELETON;AGGCACT,MIR-515-3P;ALCALAY_AML_BY_NPM1_LOCALIZATION_UP;ALONSO_METASTASIS_UP;ATACTGT,MIR-144;ATGAAGG,MIR-205;BASSO_HAIRY_CELL_LEUKEMIA_DN;BERTUCCI_MEDULLARY_VS_DUCTAL_BREAST_CANCER_UP;BOGNI_TREATMENT_RELATED_MYELOID_LEUKEMIA_UP;BONOME_OVARIAN_CANCER_SURVIVAL_SUBOPTIMAL_DEBULKING;…	3D-structure;Acetylation;Actin-binding;Alternativesplicing;Apoptosis;Calmodulin-binding;Celljunction;Cellmembrane;Completeproteome;Cytoplasm;Cytoskeleton;Directproteinsequencing;Elliptocytosis;Glycoprotein;Hereditaryhemolyticanemia;Membrane;Nucleus;Phosphoprotein;Polymorphism;Pyropoikilocytosis;Referenceproteome;Transmembrane;Transmembranehelix;Tumorsuppressor
-1.94994	-1.685	-0.765489	-0.197906	NaN	-1.01248	NaN	-2.22384	-2.42822	-1.35541	0.102269	-0.66529	NaN	NaN	-2.28392	-3.52117	-1.37231	-3.36852	-1.72058	-2.03892	-3.26999	-2.78841	-0.922156	-1.92084	-1.98938	-0.640869	-0.550352	-1.04068	-1.85944	-3.27478	-3.06213	NaN	-0.732131	0.577704	-1.52866	-1.89014	-0.361481	0.195533	S	2	___1	actin cytoskeleton organization;actin filament-based process;cellular component organization;cellular component organization at cellular level;cellular component organization or biogenesis;cellular component organization or biogenesis at cellular level;cellular process;cortical actin cytoskeleton organization;cortical cytoskeleton organization;cytoskeleton organization;organelle organization	structural molecule activity	adherens junction;anchoring junction;cell cortex part;cell junction;cell part;cell-substrate adherens junction;cell-substrate junction;cytoplasmic part;cytoskeletal part;extracellular membrane-bounded organelle;extracellular organelle;extracellular region part;extracellular vesicular exosome;extrinsic to membrane;focal adhesion;intracellular membrane-bounded organelle;intracellular organelle;intr…	cellular component organization;cellular process;cytoskeleton organization;organelle organization	cell part;extracellular organelle;intracellular membrane-bounded organelle;intracellular organelle;membrane;nucleoplasm;nucleus;organelle;plasma membrane;vesicle	Tight junction	4_1_CTD;FA;FERM_C;FERM_M;FERM_N;SAB	ACTIN_CYTOSKELETON;BASSO_HAIRY_CELL_LEUKEMIA_DN;BROCKE_APOPTOSIS_REVERSED_BY_IL6;BRUECKNER_TARGETS_OF_MIRLET7A3_DN;CASORELLI_ACUTE_PROMYELOCYTIC_LEUKEMIA_DN;CELL_CORTEX;CELL_CORTEX_PART;CHARAFE_BREAST_CANCER_LUMINAL_VS_MESENCHYMAL_DN;CHEN_METABOLIC_SYNDROM_NETWORK;CHICAS_RB1_TARGETS_CONFLUENT;chr6q23;CORTICAL_ACTIN_CYTOSKELETON;CORTICAL_CYTOSKELETON;CREIGHTON_ENDOCRINE_THERAPY_RESISTANCE_5;CYTOPL…	Acetylation;Actin-binding;Alternativesplicing;Cellmembrane;Completeproteome;Cytoplasm;Cytoskeleton;Directproteinsequencing;Membrane;Phosphoprotein;Polymorphism;Referenceproteome
-1.33752	NaN	-2.44836	NaN	-0.810117	-0.650283	NaN	-2.32578	-2.09273	-1.22144	-2.24929	-2.79456	-3.20305	NaN	-3.83966	-0.815759	-1.24873	-3.63999	-0.763559	NaN	-2.15585	-2.63276	-3.09523	-2.78352	-3.49074	-2.62451	NaN	-2.46859	NaN	NaN	-0.214432	NaN	-2.67086	0.580933	-2.17101	-2.62864	-0.457627	0.130685	S	2	___1			cell part;cytoplasmic membrane-bounded vesicle;cytoplasmic part;cytoplasmic vesicle;Golgi apparatus;Golgi apparatus part;integral to membrane;intracellular membrane-bounded organelle;intracellular organelle;intracellular organelle part;intracellular part;intrinsic to membrane;membrane;membrane part;membrane-bounded organelle;membrane-bounded vesicle;nuclear part;nucleoplasm;organelle;organelle pa…		cell part;cytoplasmic membrane-bounded vesicle;Golgi apparatus;intracellular membrane-bounded organelle;intracellular organelle;membrane;nucleoplasm;organelle;plasma membrane;vesicle			ACCAAAG,MIR-9;BALDWIN_PRKCI_TARGETS_UP;BASSO_B_LYMPHOCYTE_NETWORK;CACTTTG,MIR-520G,MIR-520H;CASORELLI_ACUTE_PROMYELOCYTIC_LEUKEMIA_UP;CCTGCTG,MIR-214;chr2p11;CREIGHTON_ENDOCRINE_THERAPY_RESISTANCE_3;CTCAGGG,MIR-125B,MIR-125A;CYTOPLASM;CYTOPLASMIC_MEMBRANE_BOUND_VESICLE;CYTOPLASMIC_PART;CYTOPLASMIC_VESICLE;FAELT_B_CLL_WITH_VH_REARRANGEMENTS_DN;FEVR_CTNNB1_TARGETS_UP;GCACTTT,MIR-17-5P,MIR-20A,MIR-1…	Alternativesplicing;Cellmembrane;Completeproteome;Glycoprotein;Golgiapparatus;Membrane;Phosphoprotein;Polymorphism;Referenceproteome;Repeat;Signal;Transmembrane;Transmembranehelix
-0.246259	2.8402	0.682008	1.92108	1.01013	1.85645	NaN	3.46568	1.30852	0.977676	1.57717	0.793271	1.9455	2.75337	3.48713	-0.222919	NaN	0.752007	1.58222	2.37596	1.35106	NaN	1.09069	0.484985	1.35695	1.20337	NaN	3.21213	2.35379	-0.649077	1.60553	NaN	1.72116	0.839746	1.44284	1.46959	0.0267429	0.421211	S	2	___1	actin cytoskeleton organization;actin filament organization;actin filament-based movement;actin filament-based process;actin polymerization or depolymerization;biological regulation;cellular component assembly;cellular component movement;cellular component organization;cellular component organization at cellular level;cellular component organization or biogenesis;cellular component organization o…	actin binding;binding;cytoskeletal protein binding;profilin binding;protein binding	actin cytoskeleton;actin filament;cell part;cell projection;cytoplasmic membrane-bounded vesicle;cytoplasmic part;cytoplasmic vesicle;cytoskeletal part;cytoskeleton;cytosol;intracellular membrane-bounded organelle;intracellular non-membrane-bounded organelle;intracellular organelle;intracellular organelle part;intracellular part;macromolecular complex;membrane-bounded organelle;membrane-bounded v…	biological regulation;cellular component assembly;cellular component movement;cellular component organization;cellular process;cytoskeleton organization;immune system process;macromolecular complex assembly;multi-organism process;organelle organization;protein complex assembly;response to biotic stimulus;response to stimulus;response to stress;signal transduction	cell part;cell projection;cytoplasmic membrane-bounded vesicle;cytoskeleton;cytosol;intracellular membrane-bounded organelle;intracellular non-membrane-bounded organelle;intracellular organelle;macromolecular complex;organelle;protein complex;vesicle		WH2	ACTIN_BINDING;ACTIN_CYTOSKELETON;ACTIN_CYTOSKELETON_ORGANIZATION_AND_BIOGENESIS;ACTIN_FILAMENT_BASED_PROCESS;ACTIN_POLYMERIZATION_AND_OR_DEPOLYMERIZATION;ATTCTTT,MIR-186;AZARE_NEOPLASTIC_TRANSFORMATION_BY_STAT3_DN;BANDRES_RESPONSE_TO_CARMUSTIN_MGMT_48HR_DN;BANDRES_RESPONSE_TO_CARMUSTIN_WITHOUT_MGMT_48HR_DN;BOYAULT_LIVER_CANCER_SUBCLASS_G5_DN;BYSTRYKH_HEMATOPOIESIS_STEM_CELL_QTL_TRANS;CAGTATT,MIR-…	3D-structure;Actin-binding;Alternativesplicing;Cellprojection;Completeproteome;Cytoplasm;Cytoplasmicvesicle;Cytoskeleton;Phosphoprotein;Polymorphism;Referenceproteome;Repeat
NaN	2.72333	1.42416	1.50894	1.45254	1.89197	0.525472	2.87642	0.799407	1.42481	2.3978	1.42975	0.669508	2.37187	2.99349	-0.0921381	-0.229131	0.942274	1.62524	1.81091	NaN	0.611337	0.926484	0.798102	1.35892	2.14101	1.12414	3.70482	1.7268	1.08057	1.72308	2.48977	1.61127	0.648602	1.42975	1.61825	0.188507	0.269868	S	2	___1	actin cytoskeleton organization;actin filament organization;actin filament-based movement;actin filament-based process;actin polymerization or depolymerization;biological regulation;cellular component assembly;cellular component movement;cellular component organization;cellular component organization at cellular level;cellular component organization or biogenesis;cellular component organization o…	actin binding;binding;cytoskeletal protein binding;profilin binding;protein binding	actin cytoskeleton;actin filament;cell part;cell projection;cytoplasmic membrane-bounded vesicle;cytoplasmic part;cytoplasmic vesicle;cytoskeletal part;cytoskeleton;cytosol;intracellular membrane-bounded organelle;intracellular non-membrane-bounded organelle;intracellular organelle;intracellular organelle part;intracellular part;macromolecular complex;membrane-bounded organelle;membrane-bounded v…	biological regulation;cellular component assembly;cellular component movement;cellular component organization;cellular process;cytoskeleton organization;immune system process;macromolecular complex assembly;multi-organism process;organelle organization;protein complex assembly;response to biotic stimulus;response to stimulus;response to stress;signal transduction	cell part;cell projection;cytoplasmic membrane-bounded vesicle;cytoskeleton;cytosol;intracellular membrane-bounded organelle;intracellular non-membrane-bounded organelle;intracellular organelle;macromolecular complex;organelle;protein complex;vesicle		WH2	ACTIN_BINDING;ACTIN_CYTOSKELETON;ACTIN_CYTOSKELETON_ORGANIZATION_AND_BIOGENESIS;ACTIN_FILAMENT_BASED_PROCESS;ACTIN_POLYMERIZATION_AND_OR_DEPOLYMERIZATION;ATTCTTT,MIR-186;AZARE_NEOPLASTIC_TRANSFORMATION_BY_STAT3_DN;BANDRES_RESPONSE_TO_CARMUSTIN_MGMT_48HR_DN;BANDRES_RESPONSE_TO_CARMUSTIN_WITHOUT_MGMT_48HR_DN;BOYAULT_LIVER_CANCER_SUBCLASS_G5_DN;BYSTRYKH_HEMATOPOIESIS_STEM_CELL_QTL_TRANS;CAGTATT,MIR-…	3D-structure;Actin-binding;Alternativesplicing;Cellprojection;Completeproteome;Cytoplasm;Cytoplasmicvesicle;Cytoskeleton;Phosphoprotein;Polymorphism;Referenceproteome;Repeat
NaN	0.277481	NaN	NaN	NaN	NaN	NaN	NaN	0.567507	-0.575444	1.03074	NaN	NaN	NaN	0.713932	NaN	NaN	NaN	NaN	NaN	NaN	NaN	NaN	1.36374	0.774797	0.864497	0.866644	NaN	1.08843	NaN	NaN	NaN	0.65938	0.125567	0.567507	0.865571	0.298064	0.185693	S	2	___1	anatomical structure morphogenesis;antral ovarian follicle growth;biological regulation;biosynthetic process;carbohydrate homeostasis;cell maturation;cell surface receptor linked signaling pathway;cellular biosynthetic process;cellular developmental process;cellular macromolecule biosynthetic process;cellular macromolecule metabolic process;cellular metabolic process;cellular nitrogen compound me…	binding;chromatin binding;chromatin DNA binding;core promoter binding;DNA binding;enzyme binding;kinase binding;nucleic acid binding;nucleic acid binding transcription factor activity;protein binding;protein kinase binding;regulatory region DNA binding;regulatory region nucleic acid binding;sequence-specific DNA binding;sequence-specific DNA binding RNA polymerase II transcription factor activity…	cell part;cytoplasm;cytoplasmic part;cytosol;intracellular membrane-bounded organelle;intracellular organelle;intracellular organelle part;intracellular part;membrane;membrane-bounded organelle;nuclear part;nucleoplasm;nucleus;organelle;organelle part	anatomical structure morphogenesis;biological regulation;biosynthetic process;cell maturation;cellular metabolic process;cellular nitrogen compound metabolic process;cellular process;developmental maturation;developmental process;growth;homeostatic process;immune system process;macromolecule metabolic process;metabolic process;multicellular organismal process;nitrogen compound metabolic process;n…	cell part;cytoplasm;cytosol;intracellular membrane-bounded organelle;intracellular organelle;membrane;nucleoplasm;nucleus;organelle	Chemokine signaling pathway;Endometrial cancer;Neurotrophin signaling pathway;Non-small cell lung cancer	Fork_head	AACTGAC,MIR-223;AACTTT_UNKNOWN;ACCTGTTG_UNKNOWN;ACEVEDO_METHYLATED_IN_LIVER_CANCER_DN;AMUNDSON_RESPONSE_TO_ARSENITE;ANATOMICAL_STRUCTURE_DEVELOPMENT;APOPTOSIS_GO;BENPORATH_NANOG_TARGETS;BIOCARTA_ACH_PATHWAY;BIOCARTA_AKT_PATHWAY;BIOCARTA_LONGEVITY_PATHWAY;BIOCARTA_PTEN_PATHWAY;BIOPOLYMER_METABOLIC_PROCESS;BLALOCK_ALZHEIMERS_DISEASE_UP;BLUM_RESPONSE_TO_SALIRASIB_UP;BROCKE_APOPTOSIS_REVERSED_BY_IL6;…	3D-structure;Acetylation;Activator;Alternativesplicing;Apoptosis;Chromosomalrearrangement;Completeproteome;Cytoplasm;DNA-binding;Methylation;Nucleus;Phosphoprotein;Proto-oncogene;Referenceproteome;Transcription;Transcriptionregulation;Ublconjugation
-0.106609	-0.509666	-2.20905	NaN	NaN	-0.93723	NaN	-0.589894	0.30414	-0.45131	-0.799398	-2.47759	-1.10988	NaN	1.0215	-1.01764	0.363074	-2.37866	-0.750461	1.19501	1.25789	NaN	NaN	NaN	NaN	0.843732	NaN	-2.73447	NaN	NaN	-0.834795	-0.571634	2.09826	0.202522	-0.694646	0.136049	0.830695	0.0119602	S	2	___1	activation of immune response;antigen receptor-mediated signaling pathway;biological regulation;blood coagulation;calcium-mediated signaling;cell activation;cell activation involved in immune response;cell surface receptor linked signaling pathway;cellular process;cellular response to stimulus;coagulation;defense response;establishment of localization;establishment of localization in cell;exocyto…	binding;binding, bridging;enzyme binding;kinase binding;protein binding;protein binding, bridging;protein kinase binding;SH3/SH2 adaptor activity;signaling adaptor activity	cell junction;cell part;cell-cell junction;cytoplasmic part;immunological synapse;integral to membrane;intracellular membrane-bounded organelle;intracellular organelle;intracellular organelle part;intracellular part;intrinsic to membrane;lysosome;lytic vacuole;macromolecular complex;mast cell granule;membrane;membrane part;membrane raft;membrane-bounded organelle;nuclear part;organelle;organelle …	biological regulation;cell activation;cellular process;coagulation;establishment of localization;exocytosis;homeostatic process;immune system process;macromolecule metabolic process;metabolic process;multicellular organismal process;regulation of body fluid levels;regulation of protein modification process;response to stimulus;response to stress;secretion;signal transduction;transport;vesicle-med…	cell part;intracellular membrane-bounded organelle;intracellular organelle;lysosome;macromolecular complex;membrane;organelle;plasma membrane;protein complex;vacuole	Fc epsilon RI signaling pathway;Fc gamma R-mediated phagocytosis;Natural killer cell mediated cytotoxicity;T cell receptor signaling pathway	LAT	BIOCARTA_NKCELLS_PATHWAY;BIOCARTA_TCR_PATHWAY;BOSCO_INTERFERON_INDUCED_ANTIVIRAL_MODULE;CAGCTG_V$AP4_Q5;CAGGTA_V$AREB6_01;CALCIUM_MEDIATED_SIGNALING;CELL_ACTIVATION;CELL_SURFACE_RECEPTOR_LINKED_SIGNAL_TRANSDUCTION_GO_0007166;chr16q13;DCA_UP.V1_DN;GCTNWTTGK_UNKNOWN;GGGAGGRR_V$MAZ_Q6;GGGTGGRR_V$PAX4_03;GNF2_ATM;GSE10239_NAIVE_VS_KLRG1HIGH_EFF_CD8_TCELL_UP;GSE11924_TH1_VS_TH17_CD4_TCELL_UP;GSE11924_…	Adaptiveimmunity;Alternativesplicing;Cellmembrane;Completeproteome;Directproteinsequencing;Immunity;Lipoprotein;Mastcelldegranulation;Membrane;Palmitate;Phosphoprotein;Referenceproteome;Signal-anchor;Transmembrane;Transmembranehelix
3.79722	2.23166	NaN	-0.416152	NaN	NaN	2.36845	NaN	3.441	2.89344	2.67055	NaN	2.5551	5.02002	4.10425	2.95416	3.71634	0.364123	2.118	NaN	4.41533	4.20954	NaN	3.47713	3.41757	2.81053	NaN	NaN	5.44385	NaN	NaN	3.69744	3.78095	0.0767747	2.89344	3.69744	0.803995	0.014262	S	2	___1	activation of immune response;antigen receptor-mediated signaling pathway;biological regulation;blood coagulation;calcium-mediated signaling;cell activation;cell activation involved in immune response;cell surface receptor linked signaling pathway;cellular process;cellular response to stimulus;coagulation;defense response;establishment of localization;establishment of localization in cell;exocyto…	binding;binding, bridging;enzyme binding;kinase binding;protein binding;protein binding, bridging;protein kinase binding;SH3/SH2 adaptor activity;signaling adaptor activity	cell junction;cell part;cell-cell junction;cytoplasmic part;immunological synapse;integral to membrane;intracellular membrane-bounded organelle;intracellular organelle;intracellular organelle part;intracellular part;intrinsic to membrane;lysosome;lytic vacuole;macromolecular complex;mast cell granule;membrane;membrane part;membrane raft;membrane-bounded organelle;nuclear part;organelle;organelle …	biological regulation;cell activation;cellular process;coagulation;establishment of localization;exocytosis;homeostatic process;immune system process;macromolecule metabolic process;metabolic process;multicellular organismal process;regulation of body fluid levels;regulation of protein modification process;response to stimulus;response to stress;secretion;signal transduction;transport;vesicle-med…	cell part;intracellular membrane-bounded organelle;intracellular organelle;lysosome;macromolecular complex;membrane;organelle;plasma membrane;protein complex;vacuole	Fc epsilon RI signaling pathway;Fc gamma R-mediated phagocytosis;Natural killer cell mediated cytotoxicity;T cell receptor signaling pathway	LAT	BIOCARTA_NKCELLS_PATHWAY;BIOCARTA_TCR_PATHWAY;BOSCO_INTERFERON_INDUCED_ANTIVIRAL_MODULE;CAGCTG_V$AP4_Q5;CAGGTA_V$AREB6_01;CALCIUM_MEDIATED_SIGNALING;CELL_ACTIVATION;CELL_SURFACE_RECEPTOR_LINKED_SIGNAL_TRANSDUCTION_GO_0007166;chr16q13;DCA_UP.V1_DN;GCTNWTTGK_UNKNOWN;GGGAGGRR_V$MAZ_Q6;GGGTGGRR_V$PAX4_03;GNF2_ATM;GSE10239_NAIVE_VS_KLRG1HIGH_EFF_CD8_TCELL_UP;GSE11924_TH1_VS_TH17_CD4_TCELL_UP;GSE11924_…	Adaptiveimmunity;Alternativesplicing;Cellmembrane;Completeproteome;Directproteinsequencing;Immunity;Lipoprotein;Mastcelldegranulation;Membrane;Palmitate;Phosphoprotein;Referenceproteome;Signal-anchor;Transmembrane;Transmembranehelix
-0.811631	0.947425	0.0807473	0.703803	0.903412	1.09001	-1.78354	0.0101172	-0.0858157	1.2114	0.987579	-0.0455588	0.0732962	0.979772	0.777574	-0.802506	NaN	-0.321933	-0.294668	0.794752	-0.70358	-0.0614505	-0.0323273	-0.341539	-0.475318	0.940361	0.790606	0.206275	0.311627	NaN	0.864343	1.16688	0.59252	0.88319	0.0807473	0.258951	0.178204	0.278663	S	2	___1	associative learning;asymmetric cell division;behavior;biological regulation;cell cycle phase;cell cycle process;cell division;cell surface receptor linked signaling pathway;cellular component organization;cellular component organization at cellular level;cellular component organization or biogenesis;cellular component organization or biogenesis at cellular level;cellular process;cellular respons…	binding;cytoskeletal protein binding;enzyme activator activity;enzyme regulator activity;GDP-dissociation inhibitor activity;GTPase activator activity;GTPase regulator activity;microtubule binding;molecular transducer activity;nucleoside-triphosphatase regulator activity;protein binding;protein complex scaffold;receptor signaling complex scaffold activity;receptor signaling protein activity;signa…	cell junction;cell part;cell projection;cell projection part;centrosome;cytoplasm;cytoplasmic part;cytoskeletal part;dendrite;dendritic spine;intracellular membrane-bounded organelle;intracellular non-membrane-bounded organelle;intracellular organelle;intracellular organelle part;intracellular part;macromolecular complex;membrane;membrane-bounded organelle;microtubule;microtubule organizing cente…	behavior;biological regulation;cell division;cellular component organization;cellular process;chromosome segregation;cytoskeleton organization;establishment of localization;mitosis;multicellular organismal process;neurological system process;nuclear division;nuclear transport;nucleocytoplasmic transport;organelle fission;organelle organization;regulation of protein modification process;response t…	cell part;cell projection;centrosome;cytoplasm;intracellular membrane-bounded organelle;intracellular non-membrane-bounded organelle;intracellular organelle;macromolecular complex;membrane;microtubule organizing center;neuron projection;nucleus;organelle;plasma membrane;protein complex		GoLoco;RBD;RGS	ACOSTA_PROLIFERATION_INDEPENDENT_MYC_TARGETS_UP;BLALOCK_ALZHEIMERS_DISEASE_DN;BLALOCK_ALZHEIMERS_DISEASE_INCIPIENT_DN;BONOME_OVARIAN_CANCER_SURVIVAL_OPTIMAL_DEBULKING;CELL_SURFACE_RECEPTOR_LINKED_SIGNAL_TRANSDUCTION_GO_0007166;CHEN_METABOLIC_SYNDROM_NETWORK;chr5q35;DARWICHE_PAPILLOMA_PROGRESSION_RISK;DODD_NASOPHARYNGEAL_CARCINOMA_UP;ENZYME_ACTIVATOR_ACTIVITY;ENZYME_REGULATOR_ACTIVITY;G_PROTEIN_CO…	3D-structure;Alternativesplicing;Cellcycle;Celldivision;Celljunction;Cellmembrane;Cellprojection;Completeproteome;Cytoplasm;Cytoskeleton;GTPaseactivation;Membrane;Microtubule;Nucleus;Phosphoprotein;Postsynapticcellmembrane;Referenceproteome;Repeat;Signaltransductioninhibitor;Synapse
-0.322731	1.63918	1.22574	1.44517	1.76843	1.96983	-1.0214	-0.0885936	0.445742	1.87667	1.49856	0.494557	0.229511	1.79413	1.17998	0.210356	-0.338442	0.596977	0.313994	1.13658	-0.281902	0.873532	0.545945	0.154601	0.680241	1.68872	1.05429	0.17174	1.3447	-1.19748	1.56078	1.60404	1.15952	0.761438	0.888477	0.873532	-0.0149441	0.463349	S	2	___1	associative learning;asymmetric cell division;behavior;biological regulation;cell cycle phase;cell cycle process;cell division;cell surface receptor linked signaling pathway;cellular component organization;cellular component organization at cellular level;cellular component organization or biogenesis;cellular component organization or biogenesis at cellular level;cellular process;cellular respons…	binding;cytoskeletal protein binding;enzyme activator activity;enzyme regulator activity;GDP-dissociation inhibitor activity;GTPase activator activity;GTPase regulator activity;microtubule binding;molecular transducer activity;nucleoside-triphosphatase regulator activity;protein binding;protein complex scaffold;receptor signaling complex scaffold activity;receptor signaling protein activity;signa…	cell junction;cell part;cell projection;cell projection part;centrosome;cytoplasm;cytoplasmic part;cytoskeletal part;dendrite;dendritic spine;intracellular membrane-bounded organelle;intracellular non-membrane-bounded organelle;intracellular organelle;intracellular organelle part;intracellular part;macromolecular complex;membrane;membrane-bounded organelle;microtubule;microtubule organizing cente…	behavior;biological regulation;cell division;cellular component organization;cellular process;chromosome segregation;cytoskeleton organization;establishment of localization;mitosis;multicellular organismal process;neurological system process;nuclear division;nuclear transport;nucleocytoplasmic transport;organelle fission;organelle organization;regulation of protein modification process;response t…	cell part;cell projection;centrosome;cytoplasm;intracellular membrane-bounded organelle;intracellular non-membrane-bounded organelle;intracellular organelle;macromolecular complex;membrane;microtubule organizing center;neuron projection;nucleus;organelle;plasma membrane;protein complex		GoLoco;RBD;RGS	ACOSTA_PROLIFERATION_INDEPENDENT_MYC_TARGETS_UP;BLALOCK_ALZHEIMERS_DISEASE_DN;BLALOCK_ALZHEIMERS_DISEASE_INCIPIENT_DN;BONOME_OVARIAN_CANCER_SURVIVAL_OPTIMAL_DEBULKING;CELL_SURFACE_RECEPTOR_LINKED_SIGNAL_TRANSDUCTION_GO_0007166;CHEN_METABOLIC_SYNDROM_NETWORK;chr5q35;DARWICHE_PAPILLOMA_PROGRESSION_RISK;DODD_NASOPHARYNGEAL_CARCINOMA_UP;ENZYME_ACTIVATOR_ACTIVITY;ENZYME_REGULATOR_ACTIVITY;G_PROTEIN_CO…	3D-structure;Alternativesplicing;Cellcycle;Celldivision;Celljunction;Cellmembrane;Cellprojection;Completeproteome;Cytoplasm;Cytoskeleton;GTPaseactivation;Membrane;Microtubule;Nucleus;Phosphoprotein;Postsynapticcellmembrane;Referenceproteome;Repeat;Signaltransductioninhibitor;Synapse
NaN	NaN	NaN	NaN	NaN	NaN	NaN	-2.4674	-2.62481	-2.52979	NaN	NaN	-2.55363	NaN	-2.25759	NaN	NaN	NaN	NaN	-2.25544	NaN	NaN	NaN	-2.236	NaN	-2.33368	NaN	-2.7311	NaN	NaN	NaN	NaN	-0.957767	0.273548	-2.52979	-2.25544	0.274352	0.202384	S	2	___1	cap-independent translational initiation;cellular component assembly;cellular component assembly at cellular level;cellular component disassembly;cellular component disassembly at cellular level;cellular component organization;cellular component organization at cellular level;cellular component organization or biogenesis;cellular component organization or biogenesis at cellular level;cellular mac…	binding;nucleic acid binding;RNA binding;translation factor activity, nucleic acid binding;translation initiation factor activity		cellular component assembly;cellular component disassembly;cellular component organization;cellular macromolecular complex assembly;cellular process;macromolecular complex assembly;ribonucleoprotein complex assembly;translational initiation			SUI1	CAGCTG_V$AP4_Q5;CAIRO_HEPATOBLASTOMA_UP;chr12q24;DARWICHE_PAPILLOMA_RISK_HIGH_DN;DARWICHE_PAPILLOMA_RISK_LOW_DN;DARWICHE_SKIN_TUMOR_PROMOTER_DN;DARWICHE_SQUAMOUS_CELL_CARCINOMA_DN;DODD_NASOPHARYNGEAL_CARCINOMA_DN;GARCIA_TARGETS_OF_FLI1_AND_DAX1_DN;GCM_CHUK;GCM_DENR;GCM_NF2;GCTNWTTGK_UNKNOWN;GGGAGGRR_V$MAZ_Q6;GGGCGGR_V$SP1_Q6;GNF2_DENR;GRAESSMANN_APOPTOSIS_BY_DOXORUBICIN_UP;GSE11864_CSF1_PAM3CYS_V…	Acetylation;Completeproteome;Initiationfactor;Phosphoprotein;Proteinbiosynthesis;Referenceproteome
-2.46502	NaN	0.591165	NaN	0.470795	2.13538	NaN	-0.211403	0.519467	0.720876	1.70906	0.215286	-0.718643	1.95499	0.864281	-0.669892	-0.207114	-0.814422	1.79699	-0.284819	NaN	0.495891	0.320989	-1.10315	0.642443	2.23979	1.71985	0.638106	0.955162	0.00207221	2.45118	1.16213	1.62986	0.135055	0.470795	0.798803	0.328008	0.165875	S	3	___1	biological adhesion;biological regulation;cell adhesion;cellular component organization;cellular component organization or biogenesis;cellular membrane organization;cellular process;cellular response to stimulus;defense response;endocytosis;establishment of localization;immune response;immune system process;inflammatory response;innate immune response;intracellular receptor mediated signaling pat…		actin filament bundle;actomyosin;actomyosin contractile ring;cell cortex part;cell division site part;cell part;cell projection;cleavage furrow;contractile ring;cytoplasmic part;cytoskeletal part;cytosol;intracellular organelle part;intracellular part;lamellipodium;membrane;organelle part;perinuclear region of cytoplasm;stress fiber;uropod	biological adhesion;biological regulation;cell adhesion;cellular component organization;cellular membrane organization;cellular process;endocytosis;establishment of localization;immune system process;membrane invagination;membrane organization;response to stimulus;response to stress;signal transduction;transport;vesicle-mediated transport	cell part;cell projection;cytosol;membrane	NOD-like receptor signaling pathway	FCH;SH3_9	ALCALA_APOPTOSIS;ATF2_S_UP.V1_UP;BRUINS_UVC_RESPONSE_LATE;CAGGTG_V$E12_Q6;CAHOY_ASTROGLIAL;CHIARADONNA_NEOPLASTIC_TRANSFORMATION_KRAS_DN;chr15q24;DUNNE_TARGETS_OF_AML1_MTG8_FUSION_UP;FERREIRA_EWINGS_SARCOMA_UNSTABLE_VS_STABLE_UP;FULCHER_INFLAMMATORY_RESPONSE_LECTIN_VS_LPS_UP;GNF2_CASP1;GNF2_CASP4;GNF2_CD97;GNF2_ICAM3;GNF2_ITGB2;GNF2_PTPRC;GNF2_S100A4;GNF2_TNFRSF1B;GRAESSMANN_APOPTOSIS_BY_DOXORUBI…	3D-structure;Alternativesplicing;Celladhesion;Cellprojection;Coiledcoil;Completeproteome;Cytoplasm;Cytoskeleton;Diseasemutation;Endocytosis;Immunity;Inflammatoryresponse;Innateimmunity;Phosphoprotein;Polymorphism;Referenceproteome;SH3domain
-1.5963	-0.608444	-1.75286	-0.913884	-1.6185	-0.340744	-1.06237	0.777841	-1.77448	-0.738068	0.230299	-0.326907	-1.85377	-0.881067	-0.603243	-3.03456	-2.60429	-1.24025	-0.252401	0.773277	-1.78746	-1.14481	-0.862963	-1.24974	-1.2813	-0.906374	0.800083	1.17665	-0.976211	-1.87655	-0.739425	-0.867417	-0.417063	0.160696	-0.988126	-0.867417	0.120709	0.330141	S	2	___1	biological regulation;catabolic process;cell differentiation;cell proliferation;cellular catabolic process;cellular developmental process;cellular metabolic process;cellular nitrogen compound catabolic process;cellular nitrogen compound metabolic process;cellular process;deoxyribonucleoside monophosphate catabolic process;deoxyribonucleoside monophosphate metabolic process;deoxyribonucleotide cat…	catalytic activity;deoxyribonucleoside 5'-monophosphate N-glycosidase activity;hydrolase activity;hydrolase activity, acting on glycosyl bonds;hydrolase activity, hydrolyzing N-glycosyl compounds;nucleoside deoxyribosyltransferase activity;transferase activity;transferase activity, transferring glycosyl groups;transferase activity, transferring pentosyl groups	cell part;cytoplasm;extracellular membrane-bounded organelle;extracellular organelle;extracellular region part;extracellular vesicular exosome;intracellular membrane-bounded organelle;intracellular organelle;intracellular organelle part;intracellular part;membrane-bounded organelle;membrane-bounded vesicle;nuclear part;nucleoplasm;nucleus;organelle;organelle part;vesicle	biological regulation;catabolic process;cell differentiation;cell proliferation;cellular metabolic process;cellular nitrogen compound metabolic process;cellular process;developmental process;metabolic process;nitrogen compound metabolic process;nucleobase-containing compound catabolic process;nucleobase-containing compound metabolic process;nucleobase-containing small molecule metabolic process;n…	cell part;cytoplasm;extracellular organelle;intracellular membrane-bounded organelle;intracellular organelle;nucleoplasm;nucleus;organelle;vesicle		Nuc_deoxyrib_tr		3D-structure;Acetylation;Alternativesplicing;Completeproteome;Cytoplasm;Glycosidase;Hydrolase;Nucleotidemetabolism;Nucleus;Phosphoprotein;Referenceproteome
-1.24754	-0.760819	-1.67004	0.441713	-0.795113	-0.326601	-0.73568	0.560774	-0.991582	-0.416639	-0.385999	NaN	-0.338492	0.749059	1.29308	NaN	-1.62123	NaN	0.907551	NaN	NaN	NaN	-0.681544	NaN	0.615221	0.0810176	0.235675	NaN	1.89328	NaN	NaN	1.13507	1.7308	0.00826789	-0.416639	0.761386	1.17802	0.000821355	S	2	___1	biological regulation;negative regulation of biological process;negative regulation of cell communication;negative regulation of cellular process;negative regulation of G-protein coupled receptor protein signaling pathway;negative regulation of response to stimulus;negative regulation of signal transduction;negative regulation of signaling;positive regulation of catalytic activity;positive regula…	enzyme activator activity;enzyme regulator activity;GTPase activator activity;GTPase regulator activity;nucleoside-triphosphatase regulator activity	axon part;axon terminus;cell body;cell part;cell projection;cell projection part;cytoplasm;dendritic spine;intracellular membrane-bounded organelle;intracellular organelle;intracellular part;membrane;membrane-bounded organelle;neuron projection;neuron projection terminus;neuron spine;neuronal cell body;nucleus;organelle;plasma membrane	biological regulation	cell body;cell part;cell projection;cytoplasm;intracellular membrane-bounded organelle;intracellular organelle;membrane;neuron projection;neuronal cell body;nucleus;organelle;plasma membrane		RGS	ALCALAY_AML_BY_NPM1_LOCALIZATION_DN;BAELDE_DIABETIC_NEPHROPATHY_DN;BENPORATH_EED_TARGETS;BENPORATH_ES_WITH_H3K27ME3;BENPORATH_NANOG_TARGETS;BENPORATH_PRC2_TARGETS;BENPORATH_SOX2_TARGETS;BENPORATH_SUZ12_TARGETS;CHEN_METABOLIC_SYNDROM_NETWORK;CHICAS_RB1_TARGETS_CONFLUENT;chr10q25;DAVICIONI_MOLECULAR_ARMS_VS_ERMS_DN;DIAZ_CHRONIC_MEYLOGENOUS_LEUKEMIA_UP;DITTMER_PTHLH_TARGETS_DN;DOANE_RESPONSE_TO_ANDR…	3D-structure;Alternativesplicing;Completeproteome;Lipoprotein;Palmitate;Phosphoprotein;Polymorphism;Referenceproteome;Signaltransductioninhibitor
NaN	0.508487	0.62127	NaN	0.148163	-4.97465e-05	0.492159	0.672133	0.493901	0.806674	0.247479	0.527964	0.930467	0.338449	0.565971	5.64645	0.559236	0.431302	0.479042	0.371493	0.886573	0.189833	0.568665	0.106837	0.64654	0.252819	NaN	0.751207	0.149372	-0.414851	0.177506	0.43618	0.232003	0.186113	0.518226	0.312156	-0.206069	0.334118	S	3	___1	biological regulation;biosynthetic process;cellular biosynthetic process;cellular macromolecule biosynthetic process;cellular macromolecule metabolic process;cellular metabolic process;cellular nitrogen compound metabolic process;cellular process;macromolecule biosynthetic process;macromolecule metabolic process;metabolic process;nitrogen compound metabolic process;nucleic acid metabolic process;…	binding;nucleotide binding	cell part;intracellular membrane-bounded organelle;intracellular organelle;intracellular organelle part;intracellular part;membrane-bounded organelle;nuclear part;nucleoplasm;nucleus;organelle;organelle part	biological regulation;biosynthetic process;cellular metabolic process;cellular nitrogen compound metabolic process;cellular process;macromolecule metabolic process;metabolic process;nitrogen compound metabolic process;nucleobase-containing compound metabolic process;primary metabolic process;RNA metabolic process	cell part;intracellular membrane-bounded organelle;intracellular organelle;nucleoplasm;nucleus;organelle		RRM_1	ACEVEDO_LIVER_TUMOR_VS_NORMAL_ADJACENT_TISSUE_UP;BIOPOLYMER_METABOLIC_PROCESS;CAGGTG_V$E12_Q6;CHEOK_RESPONSE_TO_MERCAPTOPURINE_AND_LD_MTX_UP;CHIARADONNA_NEOPLASTIC_TRANSFORMATION_CDC25_UP;chrxq26;DIAZ_CHRONIC_MEYLOGENOUS_LEUKEMIA_UP;GCM_DDX5;GCM_RAD21;GGGCGGR_V$SP1_Q6;GRAESSMANN_APOPTOSIS_BY_DOXORUBICIN_DN;GRAESSMANN_APOPTOSIS_BY_SERUM_DEPRIVATION_UP;GSE12845_NAIVE_VS_PRE_GC_TONSIL_BCELL_DN;GSE14…	3D-structure;Acetylation;Activator;Completeproteome;Directproteinsequencing;Nucleus;Phosphoprotein;Polymorphism;Referenceproteome;Repeat;RNA-binding;Transcription;Transcriptionregulation
-0.149139	NaN	0.304448	NaN	0.273831	NaN	0.0931613	NaN	NaN	NaN	NaN	NaN	-0.19457	NaN	0.369558	NaN	-0.163753	-0.0170831	NaN	NaN	NaN	NaN	-0.205171	NaN	0.296408	NaN	NaN	0.668031	NaN	-0.503223	0.091536	0.216611	NaN	0.877788	0.0380391	0.154073	0.116034	0.33449	S	3	___1	biological regulation;biosynthetic process;cellular biosynthetic process;cellular macromolecule biosynthetic process;cellular macromolecule metabolic process;cellular metabolic process;cellular nitrogen compound metabolic process;cellular process;macromolecule biosynthetic process;macromolecule metabolic process;metabolic process;nitrogen compound metabolic process;nucleic acid metabolic process;…	binding;nucleotide binding	cell part;intracellular membrane-bounded organelle;intracellular organelle;intracellular organelle part;intracellular part;membrane-bounded organelle;nuclear part;nucleoplasm;nucleus;organelle;organelle part	biological regulation;biosynthetic process;cellular metabolic process;cellular nitrogen compound metabolic process;cellular process;macromolecule metabolic process;metabolic process;nitrogen compound metabolic process;nucleobase-containing compound metabolic process;primary metabolic process;RNA metabolic process	cell part;intracellular membrane-bounded organelle;intracellular organelle;nucleoplasm;nucleus;organelle		RRM_1	ACEVEDO_LIVER_TUMOR_VS_NORMAL_ADJACENT_TISSUE_UP;BIOPOLYMER_METABOLIC_PROCESS;CAGGTG_V$E12_Q6;CHEOK_RESPONSE_TO_MERCAPTOPURINE_AND_LD_MTX_UP;CHIARADONNA_NEOPLASTIC_TRANSFORMATION_CDC25_UP;chrxq26;DIAZ_CHRONIC_MEYLOGENOUS_LEUKEMIA_UP;GCM_DDX5;GCM_RAD21;GGGCGGR_V$SP1_Q6;GRAESSMANN_APOPTOSIS_BY_DOXORUBICIN_DN;GRAESSMANN_APOPTOSIS_BY_SERUM_DEPRIVATION_UP;GSE12845_NAIVE_VS_PRE_GC_TONSIL_BCELL_DN;GSE14…	3D-structure;Acetylation;Activator;Completeproteome;Directproteinsequencing;Nucleus;Phosphoprotein;Polymorphism;Referenceproteome;Repeat;RNA-binding;Transcription;Transcriptionregulation
1.21546	0.992324	1.02911	0.739028	0.890911	0.609628	1.35354	1.50772	0.892581	0.686163	0.232757	0.4478	1.00515	1.06944	1.05621	1.7583	1.05947	0.96067	1.25473	0.920284	1.49617	1.02997	1.07648	1.17929	1.6455	0.331244	0.885415	1.25889	0.357753	0.314036	0.918174	1.34663	0.118301	0.838525	0.998738	1.02997	0.0312286	0.416721	S	3	___1	biological regulation;biosynthetic process;cellular biosynthetic process;cellular macromolecule biosynthetic process;cellular macromolecule metabolic process;cellular metabolic process;cellular nitrogen compound metabolic process;cellular process;macromolecule biosynthetic process;macromolecule metabolic process;metabolic process;nitrogen compound metabolic process;nucleic acid metabolic process;…	binding;nucleotide binding	cell part;intracellular membrane-bounded organelle;intracellular organelle;intracellular organelle part;intracellular part;membrane-bounded organelle;nuclear part;nucleoplasm;nucleus;organelle;organelle part	biological regulation;biosynthetic process;cellular metabolic process;cellular nitrogen compound metabolic process;cellular process;macromolecule metabolic process;metabolic process;nitrogen compound metabolic process;nucleobase-containing compound metabolic process;primary metabolic process;RNA metabolic process	cell part;intracellular membrane-bounded organelle;intracellular organelle;nucleoplasm;nucleus;organelle		RRM_1	ACEVEDO_LIVER_TUMOR_VS_NORMAL_ADJACENT_TISSUE_UP;BIOPOLYMER_METABOLIC_PROCESS;CAGGTG_V$E12_Q6;CHEOK_RESPONSE_TO_MERCAPTOPURINE_AND_LD_MTX_UP;CHIARADONNA_NEOPLASTIC_TRANSFORMATION_CDC25_UP;chrxq26;DIAZ_CHRONIC_MEYLOGENOUS_LEUKEMIA_UP;GCM_DDX5;GCM_RAD21;GGGCGGR_V$SP1_Q6;GRAESSMANN_APOPTOSIS_BY_DOXORUBICIN_DN;GRAESSMANN_APOPTOSIS_BY_SERUM_DEPRIVATION_UP;GSE12845_NAIVE_VS_PRE_GC_TONSIL_BCELL_DN;GSE14…	3D-structure;Acetylation;Activator;Completeproteome;Directproteinsequencing;Nucleus;Phosphoprotein;Polymorphism;Referenceproteome;Repeat;RNA-binding;Transcription;Transcriptionregulation
NaN	0.177774	0.511801	NaN	1.037	1.15714	NaN	0.0291584	NaN	0.491121	0.470948	0.854384	0.536156	NaN	0.0553185	-0.181935	-0.0984652	-0.258015	-0.100209	0.110604	1.38335	NaN	0.243302	0.587947	NaN	0.253164	NaN	0.616669	0.0448608	NaN	0.211545	NaN	NaN	0.981981	0.470948	0.243302	-0.227647	0.312723	S	3	___1	biological regulation;biosynthetic process;cellular biosynthetic process;cellular macromolecule biosynthetic process;cellular macromolecule metabolic process;cellular metabolic process;cellular nitrogen compound metabolic process;cellular process;macromolecule biosynthetic process;macromolecule metabolic process;metabolic process;nitrogen compound metabolic process;nucleic acid metabolic process;…	binding;nucleotide binding	cell part;intracellular membrane-bounded organelle;intracellular organelle;intracellular organelle part;intracellular part;membrane-bounded organelle;nuclear part;nucleoplasm;nucleus;organelle;organelle part	biological regulation;biosynthetic process;cellular metabolic process;cellular nitrogen compound metabolic process;cellular process;macromolecule metabolic process;metabolic process;nitrogen compound metabolic process;nucleobase-containing compound metabolic process;primary metabolic process;RNA metabolic process	cell part;intracellular membrane-bounded organelle;intracellular organelle;nucleoplasm;nucleus;organelle		RRM_1	ACEVEDO_LIVER_TUMOR_VS_NORMAL_ADJACENT_TISSUE_UP;BIOPOLYMER_METABOLIC_PROCESS;CAGGTG_V$E12_Q6;CHEOK_RESPONSE_TO_MERCAPTOPURINE_AND_LD_MTX_UP;CHIARADONNA_NEOPLASTIC_TRANSFORMATION_CDC25_UP;chrxq26;DIAZ_CHRONIC_MEYLOGENOUS_LEUKEMIA_UP;GCM_DDX5;GCM_RAD21;GGGCGGR_V$SP1_Q6;GRAESSMANN_APOPTOSIS_BY_DOXORUBICIN_DN;GRAESSMANN_APOPTOSIS_BY_SERUM_DEPRIVATION_UP;GSE12845_NAIVE_VS_PRE_GC_TONSIL_BCELL_DN;GSE14…	3D-structure;Acetylation;Activator;Completeproteome;Directproteinsequencing;Nucleus;Phosphoprotein;Polymorphism;Referenceproteome;Repeat;RNA-binding;Transcription;Transcriptionregulation
0.645611	0.742232	0.915107	NaN	0.407203	-0.122797	1.83485	0.994995	1.37956	0.472896	0.504064	0.0789258	0.527642	NaN	0.767505	1.3151	0.475134	0.942991	1.09519	0.191103	1.04047	1.386	0.35973	0.076803	1.20395	-0.0303648	NaN	0.581694	NaN	0.221275	1.01028	NaN	0.0506141	0.464364	0.693922	0.470712	-0.22321	0.317074	S	3	___1	biological regulation;biosynthetic process;cellular biosynthetic process;cellular macromolecule biosynthetic process;cellular macromolecule metabolic process;cellular metabolic process;cellular nitrogen compound metabolic process;cellular process;macromolecule biosynthetic process;macromolecule metabolic process;metabolic process;nitrogen compound metabolic process;nucleic acid metabolic process;…	binding;nucleotide binding	cell part;intracellular membrane-bounded organelle;intracellular organelle;intracellular organelle part;intracellular part;membrane-bounded organelle;nuclear part;nucleoplasm;nucleus;organelle;organelle part	biological regulation;biosynthetic process;cellular metabolic process;cellular nitrogen compound metabolic process;cellular process;macromolecule metabolic process;metabolic process;nitrogen compound metabolic process;nucleobase-containing compound metabolic process;primary metabolic process;RNA metabolic process	cell part;intracellular membrane-bounded organelle;intracellular organelle;nucleoplasm;nucleus;organelle		RRM_1	ACEVEDO_LIVER_TUMOR_VS_NORMAL_ADJACENT_TISSUE_UP;BIOPOLYMER_METABOLIC_PROCESS;CAGGTG_V$E12_Q6;CHEOK_RESPONSE_TO_MERCAPTOPURINE_AND_LD_MTX_UP;CHIARADONNA_NEOPLASTIC_TRANSFORMATION_CDC25_UP;chrxq26;DIAZ_CHRONIC_MEYLOGENOUS_LEUKEMIA_UP;GCM_DDX5;GCM_RAD21;GGGCGGR_V$SP1_Q6;GRAESSMANN_APOPTOSIS_BY_DOXORUBICIN_DN;GRAESSMANN_APOPTOSIS_BY_SERUM_DEPRIVATION_UP;GSE12845_NAIVE_VS_PRE_GC_TONSIL_BCELL_DN;GSE14…	3D-structure;Acetylation;Activator;Completeproteome;Directproteinsequencing;Nucleus;Phosphoprotein;Polymorphism;Referenceproteome;Repeat;RNA-binding;Transcription;Transcriptionregulation
1.33463	0.662524	0.810567	0.500841	0.866525	NaN	NaN	NaN	NaN	0.573915	NaN	NaN	-0.0287741	NaN	NaN	NaN	0.308329	1.65062	NaN	NaN	NaN	NaN	-0.0152485	1.79338	1.37293	0.256126	1.33486	NaN	NaN	0.277897	1.13513	NaN	NaN	0.669839	0.662524	1.13513	0.472604	0.0899556	S	2	___1	biological regulation;biosynthetic process;cellular biosynthetic process;cellular macromolecule biosynthetic process;cellular macromolecule metabolic process;cellular metabolic process;cellular nitrogen compound metabolic process;cellular process;macromolecule biosynthetic process;macromolecule metabolic process;metabolic process;nitrogen compound metabolic process;nucleic acid metabolic process;…	binding;nucleotide binding	cell part;intracellular membrane-bounded organelle;intracellular organelle;intracellular organelle part;intracellular part;membrane-bounded organelle;nuclear part;nucleoplasm;nucleus;organelle;organelle part	biological regulation;biosynthetic process;cellular metabolic process;cellular nitrogen compound metabolic process;cellular process;macromolecule metabolic process;metabolic process;nitrogen compound metabolic process;nucleobase-containing compound metabolic process;primary metabolic process;RNA metabolic process	cell part;intracellular membrane-bounded organelle;intracellular organelle;nucleoplasm;nucleus;organelle		RRM_1	ACEVEDO_LIVER_TUMOR_VS_NORMAL_ADJACENT_TISSUE_UP;BIOPOLYMER_METABOLIC_PROCESS;CAGGTG_V$E12_Q6;CHEOK_RESPONSE_TO_MERCAPTOPURINE_AND_LD_MTX_UP;CHIARADONNA_NEOPLASTIC_TRANSFORMATION_CDC25_UP;chrxq26;DIAZ_CHRONIC_MEYLOGENOUS_LEUKEMIA_UP;GCM_DDX5;GCM_RAD21;GGGCGGR_V$SP1_Q6;GRAESSMANN_APOPTOSIS_BY_DOXORUBICIN_DN;GRAESSMANN_APOPTOSIS_BY_SERUM_DEPRIVATION_UP;GSE12845_NAIVE_VS_PRE_GC_TONSIL_BCELL_DN;GSE14…	3D-structure;Acetylation;Activator;Completeproteome;Directproteinsequencing;Nucleus;Phosphoprotein;Polymorphism;Referenceproteome;Repeat;RNA-binding;Transcription;Transcriptionregulation
0.463955	0.462026	0.822953	0.912446	0.438723	0.26186	1.14678	0.687463	0.871645	-0.0649683	-0.0108513	0.188305	0.373198	0.818706	0.7595	0.92564	-0.00328843	0.554949	0.636112	0.112062	1.03653	0.412849	0.396247	0.458276	0.895716	0.191361	NaN	-0.368452	0.155463	-0.133958	0.29575	0.68039	0.100149	0.173553	0.509452	0.345999	-0.163454	0.377938	S	3	___1	biological regulation;biosynthetic process;cellular biosynthetic process;cellular macromolecule biosynthetic process;cellular macromolecule metabolic process;cellular metabolic process;cellular nitrogen compound metabolic process;cellular process;macromolecule biosynthetic process;macromolecule metabolic process;metabolic process;nitrogen compound metabolic process;nucleic acid metabolic process;…	binding;nucleotide binding	cell part;intracellular membrane-bounded organelle;intracellular organelle;intracellular organelle part;intracellular part;membrane-bounded organelle;nuclear part;nucleoplasm;nucleus;organelle;organelle part	biological regulation;biosynthetic process;cellular metabolic process;cellular nitrogen compound metabolic process;cellular process;macromolecule metabolic process;metabolic process;nitrogen compound metabolic process;nucleobase-containing compound metabolic process;primary metabolic process;RNA metabolic process	cell part;intracellular membrane-bounded organelle;intracellular organelle;nucleoplasm;nucleus;organelle		RRM_1	ACEVEDO_LIVER_TUMOR_VS_NORMAL_ADJACENT_TISSUE_UP;BIOPOLYMER_METABOLIC_PROCESS;CAGGTG_V$E12_Q6;CHEOK_RESPONSE_TO_MERCAPTOPURINE_AND_LD_MTX_UP;CHIARADONNA_NEOPLASTIC_TRANSFORMATION_CDC25_UP;chrxq26;DIAZ_CHRONIC_MEYLOGENOUS_LEUKEMIA_UP;GCM_DDX5;GCM_RAD21;GGGCGGR_V$SP1_Q6;GRAESSMANN_APOPTOSIS_BY_DOXORUBICIN_DN;GRAESSMANN_APOPTOSIS_BY_SERUM_DEPRIVATION_UP;GSE12845_NAIVE_VS_PRE_GC_TONSIL_BCELL_DN;GSE14…	3D-structure;Acetylation;Activator;Completeproteome;Directproteinsequencing;Nucleus;Phosphoprotein;Polymorphism;Referenceproteome;Repeat;RNA-binding;Transcription;Transcriptionregulation
NaN	1.22839	NaN	0.977155	1.12394	NaN	0.0547787	0.303612	0.205575	1.07978	NaN	NaN	NaN	0.88091	NaN	NaN	NaN	1.52364	1.42749	NaN	NaN	1.42311	NaN	0.018449	1.92827	NaN	1.12374	NaN	NaN	1.50804	NaN	0.340883	1.41521	0.267427	0.977155	1.41916	0.442002	0.103361	S	2	___1	biological regulation;cell cycle;cell cycle phase;cell cycle process;cell division;cellular component organization;cellular component organization at cellular level;cellular component organization or biogenesis;cellular component organization or biogenesis at cellular level;cellular process;establishment of localization;G2/M transition of mitotic cell cycle;mitosis;mitotic cell cycle;negative reg…	binding;channel inhibitor activity;channel regulator activity;enzyme binding;enzyme inhibitor activity;enzyme regulator activity;ion channel inhibitor activity;phosphatase binding;phosphatase inhibitor activity;phosphatase regulator activity;potassium channel inhibitor activity;potassium channel regulator activity;protein binding;protein phosphatase 2A binding;protein phosphatase binding;protein …	cell part;cytoplasm;intracellular organelle part;intracellular part;nuclear part;nucleoplasm;organelle part	biological regulation;cell cycle;cell division;cellular component organization;cellular process;establishment of localization;mitosis;mitotic cell cycle;nuclear division;organelle fission;organelle organization;regulation of transport;response to chemical stimulus;response to external stimulus;response to extracellular stimulus;response to stimulus;transport	cell part;cytoplasm;nucleoplasm		Endosulfine	AGGGCAG,MIR-18A;AUXILIARY_TRANSPORT_PROTEIN_ACTIVITY;BENPORATH_NANOG_TARGETS;BENPORATH_SOX2_TARGETS;BERNARD_PPAPDC1B_TARGETS_UP;BLALOCK_ALZHEIMERS_DISEASE_DN;BONOME_OVARIAN_CANCER_SURVIVAL_OPTIMAL_DEBULKING;BUYTAERT_PHOTODYNAMIC_THERAPY_STRESS_DN;CASORELLI_ACUTE_PROMYELOCYTIC_LEUKEMIA_DN;CCAGGGG,MIR-331;CHANNEL_REGULATOR_ACTIVITY;CHARAFE_BREAST_CANCER_LUMINAL_VS_MESENCHYMAL_UP;chr1q21;CREIGHTON_E…	Acetylation;Alternativesplicing;Cellcycle;Celldivision;Completeproteome;Cytoplasm;Mitosis;Phosphoprotein;Proteinphosphataseinhibitor;Referenceproteome
NaN	-0.987263	-1.23854	-0.0908809	-0.88106	-0.382211	-1.93623	-1.09739	NaN	-0.704466	NaN	-1.34765	-1.22522	NaN	-0.6368	NaN	NaN	-0.385454	0.77657	-1.98012	-2.17613	-1.82664	-0.196779	-1.04692	-0.153268	NaN	-2.11434	0.280094	NaN	0.967544	0.364624	NaN	-1.2986	0.579706	-0.934161	-0.62185	0.312311	0.176087	S	3	___1	biological regulation;cell cycle;cell cycle phase;cell cycle process;cell division;cellular component organization;cellular component organization at cellular level;cellular component organization or biogenesis;cellular component organization or biogenesis at cellular level;cellular process;establishment of localization;G2/M transition of mitotic cell cycle;mitosis;mitotic cell cycle;negative reg…	binding;channel inhibitor activity;channel regulator activity;enzyme binding;enzyme inhibitor activity;enzyme regulator activity;ion channel inhibitor activity;phosphatase binding;phosphatase inhibitor activity;phosphatase regulator activity;potassium channel inhibitor activity;potassium channel regulator activity;protein binding;protein phosphatase 2A binding;protein phosphatase binding;protein …	cell part;cytoplasm;intracellular organelle part;intracellular part;nuclear part;nucleoplasm;organelle part	biological regulation;cell cycle;cell division;cellular component organization;cellular process;establishment of localization;mitosis;mitotic cell cycle;nuclear division;organelle fission;organelle organization;regulation of transport;response to chemical stimulus;response to external stimulus;response to extracellular stimulus;response to stimulus;transport	cell part;cytoplasm;nucleoplasm		Endosulfine	AGGGCAG,MIR-18A;AUXILIARY_TRANSPORT_PROTEIN_ACTIVITY;BENPORATH_NANOG_TARGETS;BENPORATH_SOX2_TARGETS;BERNARD_PPAPDC1B_TARGETS_UP;BLALOCK_ALZHEIMERS_DISEASE_DN;BONOME_OVARIAN_CANCER_SURVIVAL_OPTIMAL_DEBULKING;BUYTAERT_PHOTODYNAMIC_THERAPY_STRESS_DN;CASORELLI_ACUTE_PROMYELOCYTIC_LEUKEMIA_DN;CCAGGGG,MIR-331;CHANNEL_REGULATOR_ACTIVITY;CHARAFE_BREAST_CANCER_LUMINAL_VS_MESENCHYMAL_UP;chr1q21;CREIGHTON_E…	Acetylation;Alternativesplicing;Cellcycle;Celldivision;Completeproteome;Cytoplasm;Mitosis;Phosphoprotein;Proteinphosphataseinhibitor;Referenceproteome
-3.59546	-0.999147	-1.395	-1.19509	-2.1194	-1.15116	-2.05152	-1.9483	-2.46668	-2.15175	-1.23085	-1.77182	-1.9509	-0.769857	-1.00752	-4.461	-3.21555	-1.98127	-0.300114	-2.16823	-2.96238	-2.42176	-2.37635	-2.12945	-1.15041	-1.72236	-1.24981	-0.955271	-1.51364	-0.11944	-0.783091	-1.39497	-0.800529	0.120326	-1.9496	-1.39497	0.554633	0.0604297	S	2	___1	biological regulation;cell cycle;cell cycle phase;cell cycle process;cell division;cell surface receptor linked signaling pathway;cellular component organization;cellular component organization at cellular level;cellular component organization or biogenesis;cellular component organization or biogenesis at cellular level;cellular process;cellular response to stimulus;dopamine receptor signaling pa…	binding;channel inhibitor activity;channel regulator activity;enzyme binding;enzyme inhibitor activity;enzyme regulator activity;ion channel inhibitor activity;phosphatase binding;phosphatase inhibitor activity;phosphatase regulator activity;potassium channel inhibitor activity;potassium channel regulator activity;protein binding;protein phosphatase 2A binding;protein phosphatase binding;protein …	cell part;cytoplasm;intracellular organelle part;intracellular part;nuclear part;nucleoplasm;organelle part	biological regulation;cell cycle;cell division;cellular component organization;cellular process;establishment of localization;mitosis;mitotic cell cycle;nuclear division;organelle fission;organelle organization;regulation of transport;response to chemical stimulus;response to external stimulus;response to extracellular stimulus;response to stimulus;signal transduction;transport	cell part;cytoplasm;nucleoplasm		Endosulfine	AAGCACA,MIR-218;ACAACCT,MIR-453;ACEVEDO_LIVER_CANCER_UP;ACEVEDO_LIVER_TUMOR_VS_NORMAL_ADJACENT_TISSUE_UP;ACTGAAA,MIR-30A-3P,MIR-30E-3P;AGGGCAG,MIR-18A;ALCOHOL_METABOLIC_PROCESS;AUXILIARY_TRANSPORT_PROTEIN_ACTIVITY;BENPORATH_MYC_MAX_TARGETS;BENPORATH_NANOG_TARGETS;BENPORATH_SOX2_TARGETS;BERNARD_PPAPDC1B_TARGETS_UP;BIDUS_METASTASIS_UP;BIOSYNTHETIC_PROCESS;BLALOCK_ALZHEIMERS_DISEASE_DN;BLUM_RESPONSE…	Acetylation;Alternativesplicing;Cellcycle;Celldivision;Completeproteome;Cytoplasm;Mitosis;Phosphoprotein;Proteinphosphataseinhibitor;Referenceproteome
NaN	NaN	NaN	NaN	-0.233201	NaN	NaN	1.67853	NaN	NaN	NaN	NaN	NaN	1.2116	2.0847	NaN	-1.55465	NaN	0.240824	0.621984	NaN	NaN	-1.26234	NaN	NaN	0.127355	NaN	1.46926	0.260516	NaN	-1.09032	NaN	0.677785	0.523037	1.2116	0.25067	-0.960933	0.0059877	S	3	___1	biological regulation;cell cycle;cell cycle phase;cell cycle process;cell division;cellular component organization;cellular component organization at cellular level;cellular component organization or biogenesis;cellular component organization or biogenesis at cellular level;cellular process;establishment of localization;G2/M transition of mitotic cell cycle;mitosis;mitotic cell cycle;negative reg…	binding;channel inhibitor activity;channel regulator activity;enzyme binding;enzyme inhibitor activity;enzyme regulator activity;ion channel inhibitor activity;phosphatase binding;phosphatase inhibitor activity;phosphatase regulator activity;potassium channel inhibitor activity;potassium channel regulator activity;protein binding;protein phosphatase 2A binding;protein phosphatase binding;protein …	cell part;cytoplasm;intracellular organelle part;intracellular part;nuclear part;nucleoplasm;organelle part	biological regulation;cell cycle;cell division;cellular component organization;cellular process;establishment of localization;mitosis;mitotic cell cycle;nuclear division;organelle fission;organelle organization;regulation of transport;response to chemical stimulus;response to external stimulus;response to extracellular stimulus;response to stimulus;transport	cell part;cytoplasm;nucleoplasm		Endosulfine	AGGGCAG,MIR-18A;AUXILIARY_TRANSPORT_PROTEIN_ACTIVITY;BENPORATH_NANOG_TARGETS;BENPORATH_SOX2_TARGETS;BERNARD_PPAPDC1B_TARGETS_UP;BLALOCK_ALZHEIMERS_DISEASE_DN;BONOME_OVARIAN_CANCER_SURVIVAL_OPTIMAL_DEBULKING;BUYTAERT_PHOTODYNAMIC_THERAPY_STRESS_DN;CASORELLI_ACUTE_PROMYELOCYTIC_LEUKEMIA_DN;CCAGGGG,MIR-331;CHANNEL_REGULATOR_ACTIVITY;CHARAFE_BREAST_CANCER_LUMINAL_VS_MESENCHYMAL_UP;chr1q21;CREIGHTON_E…	Acetylation;Alternativesplicing;Cellcycle;Celldivision;Completeproteome;Cytoplasm;Mitosis;Phosphoprotein;Proteinphosphataseinhibitor;Referenceproteome
-0.0910096	-0.844061	-0.918187	NaN	-0.658871	-0.753894	0.355206	-0.357082	-0.603366	-0.857687	-1.10885	-0.703898	-0.0904961	-1.86733	-0.668833	-0.415646	-0.148184	-0.916889	-0.846799	-0.742675	-0.0575998	-0.0965268	-1.23264	-0.447625	-0.392458	-1.19667	NaN	-1.94661	-0.585726	-1.05346	-0.54329	-0.0854686	-0.955957	0.591227	-0.668833	-0.664201	0.0046325	0.443479	S	3	___1	biological regulation;cell cycle phase;cell cycle process;cellular component organization;cellular component organization at cellular level;cellular component organization or biogenesis;cellular component organization or biogenesis at cellular level;cellular macromolecule metabolic process;cellular metabolic process;cellular nitrogen compound metabolic process;cellular process;cellular response t…	binding;cation binding;DNA binding;double-stranded DNA binding;ion binding;metal ion binding;nucleic acid binding;structure-specific DNA binding;transition metal ion binding;zinc ion binding	cell part;chromosome;condensed chromosome;cytoplasmic part;female pronucleus;Golgi apparatus;intracellular membrane-bounded organelle;intracellular non-membrane-bounded organelle;intracellular organelle;intracellular organelle part;intracellular part;membrane;membrane-bounded organelle;mitochondrion;non-membrane-bounded organelle;nuclear matrix;nuclear part;nucleoplasm;nucleus;organelle;organelle…	biological regulation;cellular component organization;cellular metabolic process;cellular nitrogen compound metabolic process;cellular process;chromosome organization;DNA metabolic process;DNA packaging;macromolecule metabolic process;metabolic process;mitosis;nitrogen compound metabolic process;nuclear division;nucleobase-containing compound metabolic process;organelle fission;organelle organiza…	cell part;chromosome;Golgi apparatus;intracellular membrane-bounded organelle;intracellular non-membrane-bounded organelle;intracellular organelle;membrane;mitochondrion;nucleoplasm;nucleus;organelle		AKAP95	ACAWNRNSRCGG_UNKNOWN;BIOCARTA_AKAP95_PATHWAY;BYSTRYKH_HEMATOPOIESIS_STEM_CELL_AND_BRAIN_QTL_TRANS;CELL_CYCLE_GO_0007049;CELL_CYCLE_PHASE;CELL_CYCLE_PROCESS;chr19p13;DOUGLAS_BMI1_TARGETS_UP;GATTGGY_V$NFY_Q6_01;GCCATNTTG_V$YY1_Q6;GGGCGGR_V$SP1_Q6;GOLDRATH_HOMEOSTATIC_PROLIFERATION;GRAESSMANN_APOPTOSIS_BY_DOXORUBICIN_DN;GRAESSMANN_RESPONSE_TO_MC_AND_DOXORUBICIN_DN;GROSS_HYPOXIA_VIA_ELK3_AND_HIF1A_DN…	Completeproteome;DNA-binding;Metal-binding;Nucleus;Phosphoprotein;Polymorphism;Referenceproteome;Repeat;Zinc;Zinc-finger
-0.216959	1.77214	NaN	2.12752	0.580324	NaN	1.81899	0.671373	NaN	1.40995	2.16084	0.94923	1.43606	NaN	1.945	0.968635	NaN	1.2158	1.11869	-0.625049	NaN	NaN	0.903936	0.710915	0.415395	1.13586	0.221038	2.73483	NaN	0.546852	0.886862	2.16051	-0.365569	0.169812	1.40995	0.798888	-0.611062	0.0609535	S	2	___1	biological regulation;cell migration;cell motility;cell proliferation;cellular component movement;cellular component organization;cellular component organization or biogenesis;cellular process;locomotion;macromolecule metabolic process;metabolic process;neuromuscular junction development;positive regulation of biological process;positive regulation of catabolic process;positive regulation of cell…	binding;catalytic activity;cation binding;endopeptidase activity;epidermal growth factor binding;growth factor binding;hormone binding;hydrolase activity;ion binding;metal ion binding;metalloendopeptidase activity;metallopeptidase activity;peptidase activity;peptidase activity, acting on L-amino acid peptides;protein binding	cell part;cell surface;cytoplasmic part;cytosol;intracellular part	biological regulation;cell motility;cell proliferation;cellular component movement;cellular component organization;cellular process;locomotion;macromolecule metabolic process;metabolic process;primary metabolic process;protein metabolic process;proteolysis	cell part;cell surface;cytosol		Peptidase_M16;Peptidase_M16_C	ACEVEDO_LIVER_TUMOR_VS_NORMAL_ADJACENT_TISSUE_UP;ACTGCAG,MIR-17-3P;ANATOMICAL_STRUCTURE_DEVELOPMENT;BILD_CTNNB1_ONCOGENIC_SIGNATURE;CELL_DEVELOPMENT;CELL_MIGRATION;CELL_PROLIFERATION_GO_0008283;CELL_SURFACE;CHAUHAN_RESPONSE_TO_METHOXYESTRADIOL_DN;chr1p32;CYTOPLASM;CYTOPLASMIC_PART;CYTOSOL;EXTRACELLULAR_STRUCTURE_ORGANIZATION_AND_BIOGENESIS;GATTGGY_V$NFY_Q6_01;GGGCGGR_V$SP1_Q6;GROWTH_FACTOR_BINDIN…	Alternativesplicing;Completeproteome;Hydrolase;Metal-binding;Metalloprotease;Phosphoprotein;Polymorphism;Protease;Referenceproteome;Signal;Zinc
0.645789	-1.47486	-1.11107	NaN	-0.824173	-0.883317	NaN	NaN	-0.161353	-1.23731	-1.12868	-1.81646	-0.420208	NaN	NaN	0.040239	NaN	-0.473398	NaN	-0.603218	NaN	NaN	-1.03573	0.0263072	-1.00725	-2.30749	NaN	-0.349736	NaN	NaN	NaN	NaN	NaN	0.720545	-0.853745	-0.805234	0.0485113	0.39953	S	2	___1	cellular component organization;cellular component organization at cellular level;cellular component organization or biogenesis;cellular component organization or biogenesis at cellular level;cellular localization;cellular process;establishment of localization;establishment of localization in cell;establishment of protein localization;establishment of protein localization to organelle;establishme…	adenyl nucleotide binding;adenyl ribonucleotide binding;ATP binding;ATPase activity;ATPase activity, coupled;binding;catalytic activity;hydrolase activity;hydrolase activity, acting on acid anhydrides;hydrolase activity, acting on acid anhydrides, in phosphorus-containing anhydrides;nucleoside-triphosphatase activity;nucleotide binding;protein binding;protein complex binding;protein C-terminus bi…	cell part;cytoplasm;cytoplasmic part;cytosol;extracellular membrane-bounded organelle;extracellular organelle;extracellular region part;extracellular vesicular exosome;intracellular membrane-bounded organelle;intracellular organelle;intracellular organelle part;intracellular part;membrane;membrane-bounded organelle;membrane-bounded vesicle;microbody;microbody membrane;microbody part;organelle;org…	cellular component organization;cellular localization;cellular process;establishment of localization;localization;metabolic process;organelle localization;organelle organization;peroxisome organization;protein targeting;protein transport;transport	cell part;cytoplasm;cytosol;extracellular organelle;intracellular membrane-bounded organelle;intracellular organelle;membrane;microbody;organelle;peroxisome;vesicle	Peroxisome	AAA;PEX-1N;PEX-2N	ACEVEDO_LIVER_CANCER_UP;ADENYL_NUCLEOTIDE_BINDING;ADENYL_RIBONUCLEOTIDE_BINDING;ATP_BINDING;ATPASE_ACTIVITY;ATPASE_ACTIVITY_COUPLED;BENPORATH_NANOG_TARGETS;BLALOCK_ALZHEIMERS_DISEASE_DN;CELLULAR_LOCALIZATION;CHOW_RASSF1_TARGETS_UP;chr7q11;chr7q21;CYTOPLASM;CYTOPLASMIC_PART;CYTOSKELETON_ORGANIZATION_AND_BIOGENESIS;CYTOSOL;DEBIASI_APOPTOSIS_BY_REOVIRUS_INFECTION_DN;DIAZ_CHRONIC_MEYLOGENOUS_LEUKEMIA…	Alternativesplicing;ATP-binding;Completeproteome;Cytoplasm;Diseasemutation;Isopeptidebond;Membrane;Nucleotide-binding;Peroxisome;Peroxisomebiogenesis;Peroxisomebiogenesisdisorder;Phosphoprotein;Polymorphism;Proteintransport;Referenceproteome;Repeat;Transport;Ublconjugation;Zellwegersyndrome
0.0530278	-0.236889	0.0691872	NaN	-0.718536	-0.809996	0.386543	-0.279798	-0.331029	-0.412956	-0.857541	-0.784596	0.0290768	NaN	0.030282	0.396611	0.185824	-0.297438	-0.195502	-0.253017	0.283308	-0.0730629	-0.0278995	-0.436717	-0.102918	-0.251891	NaN	-0.140945	NaN	-0.728339	-0.667726	-0.212314	-0.509457	0.808677	-0.258343	-0.212314	0.0460296	0.401987	S	2	___1	cellular macromolecule metabolic process;cellular metabolic process;cellular nitrogen compound metabolic process;cellular process;macromolecule metabolic process;metabolic process;mRNA metabolic process;mRNA processing;nitrogen compound metabolic process;nuclear mRNA splicing, via spliceosome;nucleic acid metabolic process;nucleobase-containing compound metabolic process;primary metabolic process…	adenyl nucleotide binding;adenyl ribonucleotide binding;ATP binding;ATPase activity;ATPase activity, coupled;ATP-dependent helicase activity;ATP-dependent RNA helicase activity;binding;catalytic activity;helicase activity;hydrolase activity;hydrolase activity, acting on acid anhydrides;hydrolase activity, acting on acid anhydrides, in phosphorus-containing anhydrides;nucleoside-triphosphatase act…	cell part;cytoplasm;intracellular membrane-bounded organelle;intracellular organelle;intracellular organelle part;intracellular part;macromolecular complex;membrane-bounded organelle;nuclear part;nucleoplasm;nucleus;organelle;organelle part;ribonucleoprotein complex;spliceosomal complex	cellular metabolic process;cellular nitrogen compound metabolic process;cellular process;macromolecule metabolic process;metabolic process;mRNA metabolic process;mRNA processing;nitrogen compound metabolic process;nucleobase-containing compound metabolic process;primary metabolic process;RNA metabolic process;RNA processing;RNA splicing	cell part;cytoplasm;intracellular membrane-bounded organelle;intracellular organelle;macromolecular complex;nucleoplasm;nucleus;organelle;ribonucleoprotein complex;spliceosomal complex	Spliceosome	DEAD;HA2;Helicase_C;OB_NTP_bind	ACEVEDO_LIVER_CANCER_UP;ACEVEDO_LIVER_TUMOR_VS_NORMAL_ADJACENT_TISSUE_UP;BANDRES_RESPONSE_TO_CARMUSTIN_MGMT_24HR_DN;BANDRES_RESPONSE_TO_CARMUSTIN_MGMT_48HR_DN;BIOPOLYMER_METABOLIC_PROCESS;chr6p21;GINESTIER_BREAST_CANCER_20Q13_AMPLIFICATION_DN;GSE11864_UNTREATED_VS_CSF1_IFNG_IN_MAC_DN;GSE12845_IGD_POS_VS_NEG_BLOOD_BCELL_UP;GSE13229_IMM_VS_INTMATURE_NKCELL_DN;GSE13306_RA_VS_UNTREATED_TREG_DN;GSE140…	ATP-binding;Completeproteome;Helicase;Hydrolase;mRNAprocessing;mRNAsplicing;Nucleotide-binding;Nucleus;Phosphoprotein;Polymorphism;Referenceproteome
0.122343	NaN	NaN	0.0638813	-0.526903	NaN	NaN	-0.711406	-0.497375	0.109546	NaN	NaN	0.0045273	NaN	NaN	0.753377	NaN	-0.923848	NaN	-0.226137	NaN	-0.687803	-0.643859	0.359952	-1.54605	NaN	NaN	NaN	-0.391015	NaN	-1.06176	-1.14945	-0.986507	0.0583712	0.0045273	-0.687803	-0.692331	0.0382626	S	3	___1	biological regulation;catabolic process;cellular catabolic process;cellular macromolecule catabolic process;cellular macromolecule metabolic process;cellular metabolic process;cellular process;cellular protein catabolic process;cellular protein metabolic process;defense response;defense response to virus;immune effector process;immune system process;macromolecule catabolic process;macromolecule m…	binding;identical protein binding;lamin binding;protein binding;protein dimerization activity;protein heterodimerization activity;protein homodimerization activity	cell part;cytoplasmic part;endoplasmic reticulum;envelope;integral to membrane;intracellular membrane-bounded organelle;intracellular organelle;intracellular organelle part;intracellular part;intrinsic to membrane;membrane;membrane part;membrane-bounded organelle;mitochondrial membrane;mitochondrial outer membrane;mitochondrial part;mitochondrion;nuclear envelope;nuclear part;organelle;organelle …	biological regulation;catabolic process;cellular metabolic process;cellular process;immune system process;macromolecule metabolic process;metabolic process;multi-organism process;primary metabolic process;protein catabolic process;protein metabolic process;response to biotic stimulus;response to stimulus;response to stress;viral reproduction	cell part;endoplasmic reticulum;intracellular membrane-bounded organelle;intracellular organelle;membrane;mitochondrion;nuclear envelope;organelle		BNIP3	AATGTGA,MIR-23A,MIR-23B;AGGAAGC,MIR-516-3P;ALCALA_APOPTOSIS;ANTI_APOPTOSIS;APOPTOSIS_GO;BILBAN_B_CLL_LPL_UP;BLALOCK_ALZHEIMERS_DISEASE_DN;BONOME_OVARIAN_CANCER_SURVIVAL_SUBOPTIMAL_DEBULKING;BRACHAT_RESPONSE_TO_CAMPTOTHECIN_DN;BRACHAT_RESPONSE_TO_METHOTREXATE_DN;BROWNE_HCMV_INFECTION_24HR_DN;CACCAGC,MIR-138;CCTGTGA,MIR-513;CELL_DEVELOPMENT;CHEOK_RESPONSE_TO_HD_MTX_DN;chr8p21;CTTTGA_V$LEF1_Q2;CTTTG…	Alternativesplicing;Apoptosis;Completeproteome;Endoplasmicreticulum;Host-virusinteraction;Membrane;Mitochondrion;Mitochondrionoutermembrane;Nucleus;Phosphoprotein;Referenceproteome;Transmembrane;Transmembranehelix
2.71293	NaN	NaN	1.36937	1.95593	1.09969	1.78876	1.78153	2.79435	2.75426	1.60763	NaN	2.74975	NaN	1.15367	NaN	NaN	2.56763	NaN	NaN	NaN	3.74282	NaN	1.66059	1.21666	1.7336	NaN	NaN	NaN	NaN	NaN	NaN	1.44748	0.895599	1.87234	1.66059	-0.211749	0.32843	S	2	___1	biological regulation;catabolic process;cellular catabolic process;cellular macromolecule catabolic process;cellular macromolecule metabolic process;cellular metabolic process;cellular process;cellular protein catabolic process;cellular protein metabolic process;defense response;defense response to virus;immune effector process;immune system process;macromolecule catabolic process;macromolecule m…	binding;identical protein binding;lamin binding;protein binding;protein dimerization activity;protein heterodimerization activity;protein homodimerization activity	cell part;cytoplasmic part;endoplasmic reticulum;envelope;integral to membrane;intracellular membrane-bounded organelle;intracellular organelle;intracellular organelle part;intracellular part;intrinsic to membrane;membrane;membrane part;membrane-bounded organelle;mitochondrial membrane;mitochondrial outer membrane;mitochondrial part;mitochondrion;nuclear envelope;nuclear part;organelle;organelle …	biological regulation;catabolic process;cellular metabolic process;cellular process;immune system process;macromolecule metabolic process;metabolic process;multi-organism process;primary metabolic process;protein catabolic process;protein metabolic process;response to biotic stimulus;response to stimulus;response to stress;viral reproduction	cell part;endoplasmic reticulum;intracellular membrane-bounded organelle;intracellular organelle;membrane;mitochondrion;nuclear envelope;organelle		BNIP3	AATGTGA,MIR-23A,MIR-23B;AGGAAGC,MIR-516-3P;ALCALA_APOPTOSIS;ANTI_APOPTOSIS;APOPTOSIS_GO;BILBAN_B_CLL_LPL_UP;BLALOCK_ALZHEIMERS_DISEASE_DN;BONOME_OVARIAN_CANCER_SURVIVAL_SUBOPTIMAL_DEBULKING;BRACHAT_RESPONSE_TO_CAMPTOTHECIN_DN;BRACHAT_RESPONSE_TO_METHOTREXATE_DN;BROWNE_HCMV_INFECTION_24HR_DN;CACCAGC,MIR-138;CCTGTGA,MIR-513;CELL_DEVELOPMENT;CHEOK_RESPONSE_TO_HD_MTX_DN;chr8p21;CTTTGA_V$LEF1_Q2;CTTTG…	Alternativesplicing;Apoptosis;Completeproteome;Endoplasmicreticulum;Host-virusinteraction;Membrane;Mitochondrion;Mitochondrionoutermembrane;Nucleus;Phosphoprotein;Referenceproteome;Transmembrane;Transmembranehelix
1.75162	1.16596	0.606123	0.93501	1.63361	1.17881	1.84355	2.40614	2.25791	1.24374	1.42084	0.739009	1.90145	1.32826	1.59525	0.995283	1.43853	1.50438	0.850116	0.363063	1.38431	1.93843	0.555928	2.01246	0.524873	1.14759	1.37228	1.49599	1.40489	0.317751	0.39627	NaN	0.792798	0.0463414	1.42969	0.998854	-0.430831	0.14705	S	2	___1	biological regulation;catabolic process;cellular catabolic process;cellular macromolecule catabolic process;cellular macromolecule metabolic process;cellular metabolic process;cellular process;cellular protein catabolic process;cellular protein metabolic process;defense response;defense response to virus;immune effector process;immune system process;macromolecule catabolic process;macromolecule m…	binding;identical protein binding;lamin binding;protein binding;protein dimerization activity;protein heterodimerization activity;protein homodimerization activity	cell part;cytoplasmic part;endoplasmic reticulum;envelope;integral to membrane;intracellular membrane-bounded organelle;intracellular organelle;intracellular organelle part;intracellular part;intrinsic to membrane;membrane;membrane part;membrane-bounded organelle;mitochondrial membrane;mitochondrial outer membrane;mitochondrial part;mitochondrion;nuclear envelope;nuclear part;organelle;organelle …	biological regulation;catabolic process;cellular metabolic process;cellular process;immune system process;macromolecule metabolic process;metabolic process;multi-organism process;primary metabolic process;protein catabolic process;protein metabolic process;response to biotic stimulus;response to stimulus;response to stress;viral reproduction	cell part;endoplasmic reticulum;intracellular membrane-bounded organelle;intracellular organelle;membrane;mitochondrion;nuclear envelope;organelle		BNIP3	AATGTGA,MIR-23A,MIR-23B;AGGAAGC,MIR-516-3P;ALCALA_APOPTOSIS;ANTI_APOPTOSIS;APOPTOSIS_GO;BILBAN_B_CLL_LPL_UP;BLALOCK_ALZHEIMERS_DISEASE_DN;BONOME_OVARIAN_CANCER_SURVIVAL_SUBOPTIMAL_DEBULKING;BRACHAT_RESPONSE_TO_CAMPTOTHECIN_DN;BRACHAT_RESPONSE_TO_METHOTREXATE_DN;BROWNE_HCMV_INFECTION_24HR_DN;CACCAGC,MIR-138;CCTGTGA,MIR-513;CELL_DEVELOPMENT;CHEOK_RESPONSE_TO_HD_MTX_DN;chr8p21;CTTTGA_V$LEF1_Q2;CTTTG…	Alternativesplicing;Apoptosis;Completeproteome;Endoplasmicreticulum;Host-virusinteraction;Membrane;Mitochondrion;Mitochondrionoutermembrane;Nucleus;Phosphoprotein;Referenceproteome;Transmembrane;Transmembranehelix
1.67066	0.407386	-0.160965	0.355494	0.315103	-0.0298663	0.677606	0.963263	0.418578	0.482711	-0.272889	-0.192383	1.18116	-0.139726	-0.0115788	1.19119	0.873127	0.333128	0.379433	1.61612	1.38865	-0.139794	0.761478	0.274149	-0.516928	-0.571742	0.0430881	1.05494	NaN	0.393779	0.195257	1.33743	-0.0951393	0.963015	0.38144	0.326791	-0.054649	0.495822	S	2	___1	androgen receptor signaling pathway;biological regulation;biosynthetic process;cellular biosynthetic process;cellular macromolecule metabolic process;cellular metabolic process;cellular nitrogen compound metabolic process;cellular process;cellular response to stimulus;developmental process;gene expression;intracellular receptor mediated signaling pathway;macromolecule metabolic process;metabolic …	binding;hormone receptor binding;ligand-dependent nuclear receptor transcription coactivator activity;nuclear hormone receptor binding;protein binding;protein binding transcription factor activity;receptor activity;receptor binding;RNA polymerase II transcription cofactor activity;RNA polymerase II transcription factor binding transcription factor activity;thyroid hormone receptor binding;transcr…	cell part;intracellular membrane-bounded organelle;intracellular organelle;intracellular organelle part;intracellular part;macromolecular complex;mediator complex;membrane;membrane-bounded organelle;nuclear part;nucleoplasm;nucleoplasm part;nucleus;organelle;organelle part;protein complex	biological regulation;biosynthetic process;cellular metabolic process;cellular nitrogen compound metabolic process;cellular process;developmental process;macromolecule metabolic process;metabolic process;nitrogen compound metabolic process;nucleobase-containing compound metabolic process;primary metabolic process;response to stimulus;RNA metabolic process;signal transduction;transcription initiat…	cell part;intracellular membrane-bounded organelle;intracellular organelle;macromolecular complex;membrane;nucleoplasm;nucleus;organelle;protein complex		Med14	AAGCAAT,MIR-137;ACAWNRNSRCGG_UNKNOWN;ACTGTGA,MIR-27A,MIR-27B;ACTTTAT,MIR-142-5P;AMUNDSON_RESPONSE_TO_ARSENITE;ANDROGEN_RECEPTOR_SIGNALING_PATHWAY;ATACTGT,MIR-144;BENPORATH_ES_1;BIDUS_METASTASIS_UP;BIOPOLYMER_METABOLIC_PROCESS;BLUM_RESPONSE_TO_SALIRASIB_DN;CATTTCA,MIR-203;CELLULAR_COMPONENT_ASSEMBLY;chrxp11;CTTGTAT,MIR-381;DNA_DIRECTED_RNA_POLYMERASEII_HOLOENZYME;GAZDA_DIAMOND_BLACKFAN_ANEMIA_ERYT…	Activator;Completeproteome;Directproteinsequencing;Nucleus;Phosphoprotein;Polymorphism;Referenceproteome;Repeat;Transcription;Transcriptionregulation
1.03176	NaN	-0.906248	NaN	-0.0148318	NaN	NaN	NaN	NaN	NaN	NaN	NaN	NaN	NaN	-0.53409	0.949172	NaN	NaN	NaN	0.71787	NaN	NaN	0.0704971	NaN	NaN	-0.418671	NaN	NaN	NaN	0.00733548	-0.500227	NaN	NaN	0.779921	-0.0148318	0.00733548	0.0221673	0.425801	S	3	___1	androgen receptor signaling pathway;biological regulation;biosynthetic process;cellular biosynthetic process;cellular macromolecule metabolic process;cellular metabolic process;cellular nitrogen compound metabolic process;cellular process;cellular response to stimulus;developmental process;gene expression;intracellular receptor mediated signaling pathway;macromolecule metabolic process;metabolic …	binding;hormone receptor binding;ligand-dependent nuclear receptor transcription coactivator activity;nuclear hormone receptor binding;protein binding;protein binding transcription factor activity;receptor activity;receptor binding;RNA polymerase II transcription cofactor activity;RNA polymerase II transcription factor binding transcription factor activity;thyroid hormone receptor binding;transcr…	cell part;intracellular membrane-bounded organelle;intracellular organelle;intracellular organelle part;intracellular part;macromolecular complex;mediator complex;membrane;membrane-bounded organelle;nuclear part;nucleoplasm;nucleoplasm part;nucleus;organelle;organelle part;protein complex	biological regulation;biosynthetic process;cellular metabolic process;cellular nitrogen compound metabolic process;cellular process;developmental process;macromolecule metabolic process;metabolic process;nitrogen compound metabolic process;nucleobase-containing compound metabolic process;primary metabolic process;response to stimulus;RNA metabolic process;signal transduction;transcription initiat…	cell part;intracellular membrane-bounded organelle;intracellular organelle;macromolecular complex;membrane;nucleoplasm;nucleus;organelle;protein complex		Med14	AAGCAAT,MIR-137;ACAWNRNSRCGG_UNKNOWN;ACTGTGA,MIR-27A,MIR-27B;ACTTTAT,MIR-142-5P;AMUNDSON_RESPONSE_TO_ARSENITE;ANDROGEN_RECEPTOR_SIGNALING_PATHWAY;ATACTGT,MIR-144;BENPORATH_ES_1;BIDUS_METASTASIS_UP;BIOPOLYMER_METABOLIC_PROCESS;BLUM_RESPONSE_TO_SALIRASIB_DN;CATTTCA,MIR-203;CELLULAR_COMPONENT_ASSEMBLY;chrxp11;CTTGTAT,MIR-381;DNA_DIRECTED_RNA_POLYMERASEII_HOLOENZYME;GAZDA_DIAMOND_BLACKFAN_ANEMIA_ERYT…	Activator;Completeproteome;Directproteinsequencing;Nucleus;Phosphoprotein;Polymorphism;Referenceproteome;Repeat;Transcription;Transcriptionregulation
NaN	-1.62777	NaN	NaN	-1.58969	-2.26741	-0.799618	-0.416493	NaN	-2.08899	-1.69105	-1.48057	-0.959679	NaN	NaN	NaN	-0.0462389	-1.66334	-0.513726	NaN	-0.525493	NaN	-0.920166	-1.71662	NaN	-2.23236	-1.91095	-0.415294	-1.89572	NaN	-1.47546	NaN	-1.7107	0.99585	-1.58969	-1.59308	-0.00338638	0.451604	S	2	___1	ATP-dependent chromatin remodeling;biological regulation;biosynthetic process;cellular biosynthetic process;cellular component assembly;cellular component assembly at cellular level;cellular component organization;cellular component organization at cellular level;cellular component organization or biogenesis;cellular component organization or biogenesis at cellular level;cellular macromolecular c…	adenyl nucleotide binding;adenyl ribonucleotide binding;ATP binding;ATPase activity;binding;catalytic activity;chromatin binding;DNA binding;helicase activity;hydrolase activity;hydrolase activity, acting on acid anhydrides;hydrolase activity, acting on acid anhydrides, in phosphorus-containing anhydrides;nucleic acid binding;nucleoside-triphosphatase activity;nucleotide binding;purine nucleotide…	cell part;chromatin remodeling complex;chromatin silencing complex;chromosome;condensed chromosome;intracellular membrane-bounded organelle;intracellular non-membrane-bounded organelle;intracellular organelle;intracellular organelle part;intracellular part;ISWI complex;macromolecular complex;membrane-bounded organelle;non-membrane-bounded organelle;nuclear part;nucleolus;nucleoplasm;nucleus;NURF …	biological regulation;biosynthetic process;cellular component assembly;cellular component organization;cellular macromolecular complex assembly;cellular metabolic process;cellular nitrogen compound metabolic process;cellular process;chromatin modification;chromatin organization;chromosome organization;DNA metabolic process;DNA repair;gene silencing;macromolecular complex assembly;macromolecule me…	cell part;chromatin remodeling complex;chromosome;intracellular membrane-bounded organelle;intracellular non-membrane-bounded organelle;intracellular organelle;macromolecular complex;nucleolus;nucleoplasm;nucleus;organelle;protein complex		DBINO;HAND;Helicase_C;SLIDE;SNF2_N	ADENYL_NUCLEOTIDE_BINDING;ADENYL_RIBONUCLEOTIDE_BINDING;ATP_BINDING;ATPASE_ACTIVITY;BARIS_THYROID_CANCER_DN;BIOPOLYMER_METABOLIC_PROCESS;CAGCTG_V$AP4_Q5;CATTGTYY_V$SOX9_B1;CELLULAR_COMPONENT_ASSEMBLY;CGTSACG_V$PAX3_B;chr4q31;CHROMATIN_ASSEMBLY;CHROMATIN_ASSEMBLY_OR_DISASSEMBLY;CHROMATIN_REMODELING_COMPLEX;CHROMOSOME;CHROMOSOME_ORGANIZATION_AND_BIOGENESIS;CONDENSED_CHROMOSOME;DACOSTA_UV_RESPONSE_V…	Acetylation;ATP-binding;Chromatinregulator;Completeproteome;Helicase;Hydrolase;Nucleotide-binding;Nucleus;Phosphoprotein;Referenceproteome;Repeat
NaN	NaN	NaN	NaN	0.203549	-0.00467179	NaN	NaN	-1.10321	0.047506	-0.184805	NaN	NaN	NaN	-0.780838	NaN	NaN	-0.678971	0.179409	0.235575	NaN	NaN	NaN	-1.05254	1.41101	-0.225988	NaN	NaN	0.383123	NaN	-1.45549	-0.491401	-0.487407	0.583562	-0.184805	-0.225988	-0.0411828	0.490115	S	2	___1	activation of JUN kinase activity;activation of MAPK activity;biological regulation;cell differentiation;cellular component assembly;cellular component organization;cellular component organization or biogenesis;cellular developmental process;cellular macromolecule metabolic process;cellular metabolic process;cellular process;cellular protein metabolic process;developmental process;endosome transp…	binding;binding, bridging;cytoskeletal protein binding;enzyme binding;JUN kinase binding;kinase binding;kinesin binding;MAP-kinase scaffold activity;protein binding;protein complex scaffold;protein kinase binding;receptor signaling complex scaffold activity;signaling adaptor activity;structural molecule activity	acrosomal vesicle;cell part;cytoplasm;cytoplasmic membrane-bounded vesicle;cytoplasmic part;cytoplasmic vesicle;cytosol;extracellular membrane-bounded organelle;extracellular organelle;extracellular region part;extracellular vesicular exosome;integral to membrane;intracellular membrane-bounded organelle;intracellular organelle;intracellular part;intrinsic to membrane;membrane part;membrane-bounde…	biological regulation;cell differentiation;cellular component assembly;cellular component organization;cellular metabolic process;cellular process;developmental process;endosome transport;establishment of localization;macromolecular complex assembly;macromolecule metabolic process;macromolecule modification;metabolic process;multicellular organismal process;phosphorus metabolic process;primary me…	cell part;cytoplasm;cytoplasmic membrane-bounded vesicle;cytosol;extracellular organelle;intracellular membrane-bounded organelle;intracellular organelle;organelle;vesicle		Jnk-SapK_ap_N	AAANWWTGC_UNKNOWN;AACTTT_UNKNOWN;AAGCACA,MIR-218;ACAWYAAAG_UNKNOWN;AGUIRRE_PANCREATIC_CANCER_COPY_NUMBER_UP;BENPORATH_NANOG_TARGETS;BENPORATH_NOS_TARGETS;BENPORATH_OCT4_TARGETS;BENPORATH_SOX2_TARGETS;BLALOCK_ALZHEIMERS_DISEASE_UP;BROWNE_HCMV_INFECTION_14HR_DN;BROWNE_HCMV_INFECTION_1HR_DN;BUYTAERT_PHOTODYNAMIC_THERAPY_STRESS_UP;CAGGTG_V$E12_Q6;CAGTGTT,MIR-141,MIR-200A;CATRRAGC_UNKNOWN;CATTGTYY_V$S…	3D-structure;Acetylation;Alternativesplicing;Coiledcoil;Completeproteome;Cytoplasm;Cytoplasmicvesicle;Phosphoprotein;Polymorphism;Referenceproteome
1.12819	0.371324	0.509138	0.374014	0.528585	0.187671	1.43826	0.51724	0.653351	0.703843	0.808231	NaN	NaN	0.14776	0.603735	0.840377	0.826347	0.381671	-0.0302776	0.0732295	0.405893	1.41572	-0.281599	0.583419	-0.260648	0.252786	NaN	0.360762	0.848876	-0.279939	0.461692	-0.931837	0.359595	0.0273388	0.56616	0.306191	-0.259969	0.281836	S	2	___1	cellular macromolecule metabolic process;cellular metabolic process;cellular nitrogen compound metabolic process;cellular process;macromolecule metabolic process;metabolic process;nitrogen compound metabolic process;nucleic acid metabolic process;nucleobase-containing compound metabolic process;primary metabolic process;RNA metabolic process;RNA processing	binding;cation binding;ion binding;metal ion binding	cell part;extracellular region part;extracellular space;intracellular	cellular metabolic process;cellular nitrogen compound metabolic process;cellular process;macromolecule metabolic process;metabolic process;nitrogen compound metabolic process;nucleobase-containing compound metabolic process;primary metabolic process;RNA metabolic process;RNA processing	cell part;extracellular space;intracellular		zf-C3H1	AAAGGGA,MIR-204,MIR-211;AAGCAAT,MIR-137;ACACTGG,MIR-199A,MIR-199B;AGTCAGC,MIR-345;ATAACCT,MIR-154;ATGTACA,MIR-493;CATTTCA,MIR-203;chr12q21;CROMER_METASTASIS_UP;DAZARD_RESPONSE_TO_UV_NHEK_DN;DEBIASI_APOPTOSIS_BY_REOVIRUS_INFECTION_DN;FLECHNER_PBL_KIDNEY_TRANSPLANT_REJECTED_VS_OK_UP;GACTGTT,MIR-212,MIR-132;GAGACTG,MIR-452;GGCAGAC,MIR-346;GSE10094_LCMV_VS_LISTERIA_IND_EFF_CD4_TCELL_UP;GSE11924_TH1_V…	Acetylation;Alternativesplicing;Coiledcoil;Completeproteome;Metal-binding;Phosphoprotein;Polymorphism;Referenceproteome;Repeat;TPRrepeat;Zinc;Zinc-finger
0.406207	NaN	NaN	-0.753494	NaN	NaN	0.676479	0.541038	NaN	-0.485872	NaN	0.507697	0.282465	-0.750311	0.502948	0.313278	NaN	NaN	-0.279418	-0.338771	-0.269808	-0.279379	NaN	NaN	-1.17575	NaN	NaN	NaN	NaN	NaN	-0.146408	NaN	-0.374829	0.0285238	0.359742	-0.279418	-0.63916	0.052145	S	2	___1	cellular macromolecule metabolic process;cellular metabolic process;cellular nitrogen compound metabolic process;cellular process;macromolecule metabolic process;metabolic process;nitrogen compound metabolic process;nucleic acid metabolic process;nucleobase-containing compound metabolic process;primary metabolic process;RNA metabolic process;RNA processing	binding;cation binding;ion binding;metal ion binding	cell part;extracellular region part;extracellular space;intracellular	cellular metabolic process;cellular nitrogen compound metabolic process;cellular process;macromolecule metabolic process;metabolic process;nitrogen compound metabolic process;nucleobase-containing compound metabolic process;primary metabolic process;RNA metabolic process;RNA processing	cell part;extracellular space;intracellular		zf-C3H1	AAAGGGA,MIR-204,MIR-211;AAGCAAT,MIR-137;ACACTGG,MIR-199A,MIR-199B;AGTCAGC,MIR-345;ATAACCT,MIR-154;ATGTACA,MIR-493;CATTTCA,MIR-203;chr12q21;CROMER_METASTASIS_UP;DAZARD_RESPONSE_TO_UV_NHEK_DN;DEBIASI_APOPTOSIS_BY_REOVIRUS_INFECTION_DN;FLECHNER_PBL_KIDNEY_TRANSPLANT_REJECTED_VS_OK_UP;GACTGTT,MIR-212,MIR-132;GAGACTG,MIR-452;GGCAGAC,MIR-346;GSE10094_LCMV_VS_LISTERIA_IND_EFF_CD4_TCELL_UP;GSE11924_TH1_V…	Acetylation;Alternativesplicing;Coiledcoil;Completeproteome;Metal-binding;Phosphoprotein;Polymorphism;Referenceproteome;Repeat;TPRrepeat;Zinc;Zinc-finger
NaN	1.4896	0.961378	2.036	1.9286	2.22228	-0.54922	NaN	0.529518	1.13081	1.77049	1.39778	0.373769	2.22218	1.37112	0.0166742	-0.879776	-0.0787185	2.32354	0.0978554	-1.15179	NaN	-1.04786	NaN	0.847363	2.18076	1.63621	0.313493	1.35219	2.24779	1.77895	1.60196	NaN	0.965872	1.25097	1.47708	0.226109	0.238993	S	2	___1		adenyl nucleotide binding;adenyl ribonucleotide binding;ATP binding;binding;catalytic activity;cation binding;ion binding;kinase activity;magnesium ion binding;metal ion binding;nucleotide binding;phosphotransferase activity, alcohol group as acceptor;protein kinase activity;protein serine/threonine kinase activity;purine nucleotide binding;purine ribonucleoside triphosphate binding;purine ribonu…					DUF1908;PDZ;Pkinase	BONOME_OVARIAN_CANCER_SURVIVAL_SUBOPTIMAL_DEBULKING;chr19p13;ESC_V6.5_UP_EARLY.V1_UP;GSE11924_TFH_VS_TH17_CD4_TCELL_UP;GSE13493_DP_VS_CD4INTCD8POS_THYMOCYTE_UP;GSE13493_DP_VS_CD8POS_THYMOCYTE_UP;GSE1432_CTRL_VS_IFNG_6H_MICROGLIA_UP;GSE15659_TREG_VS_TCONV_UP;GSE17721_0.5H_VS_4H_CPG_BMDM_UP;GSE17721_0.5H_VS_8H_CPG_BMDM_UP;GSE17721_12H_VS_24H_LPS_BMDM_DN;GSE17721_LPS_VS_PAM3CSK4_16H_BMDM_DN;GSE17721…	3D-structure;ATP-binding;Completeproteome;Kinase;Magnesium;Nucleotide-binding;Phosphoprotein;Polymorphism;Referenceproteome;Serine/threonine-proteinkinase;Transferase
NaN	NaN	-0.93891	1.07529	-0.318978	0.424588	-1.46674	NaN	-1.60007	NaN	0.322147	-0.705686	NaN	0.539983	0.0483185	NaN	NaN	NaN	0.959568	NaN	-1.04935	NaN	NaN	NaN	NaN	0.0639467	NaN	NaN	NaN	1.851	0.657094	-0.0121357	NaN	0.201872	-0.13533	0.360521	0.49585	0.0806695	S	3	___1		adenyl nucleotide binding;adenyl ribonucleotide binding;ATP binding;binding;catalytic activity;cation binding;ion binding;kinase activity;magnesium ion binding;metal ion binding;nucleotide binding;phosphotransferase activity, alcohol group as acceptor;protein kinase activity;protein serine/threonine kinase activity;purine nucleotide binding;purine ribonucleoside triphosphate binding;purine ribonu…					DUF1908;PDZ;Pkinase	BONOME_OVARIAN_CANCER_SURVIVAL_SUBOPTIMAL_DEBULKING;chr19p13;ESC_V6.5_UP_EARLY.V1_UP;GSE11924_TFH_VS_TH17_CD4_TCELL_UP;GSE13493_DP_VS_CD4INTCD8POS_THYMOCYTE_UP;GSE13493_DP_VS_CD8POS_THYMOCYTE_UP;GSE1432_CTRL_VS_IFNG_6H_MICROGLIA_UP;GSE15659_TREG_VS_TCONV_UP;GSE17721_0.5H_VS_4H_CPG_BMDM_UP;GSE17721_0.5H_VS_8H_CPG_BMDM_UP;GSE17721_12H_VS_24H_LPS_BMDM_DN;GSE17721_LPS_VS_PAM3CSK4_16H_BMDM_DN;GSE17721…	3D-structure;ATP-binding;Completeproteome;Kinase;Magnesium;Nucleotide-binding;Phosphoprotein;Polymorphism;Referenceproteome;Serine/threonine-proteinkinase;Transferase
NaN	NaN	-0.248094	NaN	0.101333	-0.0460678	NaN	-0.222906	NaN	NaN	0.405983	-0.737876	NaN	NaN	NaN	NaN	NaN	-0.397834	NaN	NaN	NaN	NaN	-2.42374	-0.124416	-0.995429	0.208042	NaN	-0.0794362	NaN	NaN	0.232718	NaN	NaN	0.438406	-0.222906	-0.101926	0.120981	0.329889	S	3	___1	ameboidal cell migration;anatomical structure development;anatomical structure formation involved in morphogenesis;anterior/posterior pattern specification;biological regulation;biosynthetic process;cell migration;cell motility;cell proliferation;cell proliferation in forebrain;cellular biosynthetic process;cellular component movement;cellular macromolecule biosynthetic process;cellular macromole…	binding;cation binding;DNA binding;enzyme regulator activity;ion binding;metal ion binding;nucleic acid binding;phosphatase regulator activity	cell part;intracellular membrane-bounded organelle;intracellular organelle;intracellular part;membrane-bounded organelle;nucleus;organelle	anatomical structure development;anatomical structure formation involved in morphogenesis;biological regulation;biosynthetic process;cell motility;cell proliferation;cellular component movement;cellular metabolic process;cellular nitrogen compound metabolic process;cellular process;developmental process;locomotion;macromolecule metabolic process;metabolic process;nitrogen compound metabolic proce…	cell part;intracellular membrane-bounded organelle;intracellular organelle;nucleus;organelle		zf-Di19	AACTTT_UNKNOWN;AAGCACA,MIR-218;ACTGAAA,MIR-30A-3P,MIR-30E-3P;ACTGTAG,MIR-139;AGCYRWTTC_UNKNOWN;AGGAAGC,MIR-516-3P;AGTCTTA,MIR-499;ATACTGT,MIR-144;ATGCACG,MIR-517B;ATGTAGC,MIR-221,MIR-222;BENPORATH_EED_TARGETS;BENPORATH_ES_WITH_H3K27ME3;BENPORATH_NANOG_TARGETS;BENPORATH_NOS_TARGETS;BENPORATH_OCT4_TARGETS;BENPORATH_PRC2_TARGETS;BENPORATH_SOX2_TARGETS;BENPORATH_SUZ12_TARGETS;BMI1_DN_MEL18_DN.V1_UP;B…	3D-structure;Acetylation;Alternativesplicing;Completeproteome;Diseasemutation;DNA-binding;Epilepsy;Hirschsprungdisease;Homeobox;Isopeptidebond;Mentalretardation;Metal-binding;Nucleus;Polymorphism;Referenceproteome;Repeat;Repressor;Transcription;Transcriptionregulation;Ublconjugation;Zinc;Zinc-finger
-0.698594	NaN	0.329037	-0.124996	0.522669	0.169703	-0.374883	0.394767	-0.176607	-0.138872	0.235846	-0.138844	-0.682688	NaN	NaN	0.267315	NaN	0.0496624	NaN	-0.901291	NaN	-0.575129	-1.70862	0.0907099	-0.910439	NaN	0.298364	0.0683636	NaN	-0.668531	NaN	NaN	-0.118268	0.0730045	-0.0376667	-0.575129	-0.537462	0.0895393	S	2	___1	ameboidal cell migration;anatomical structure development;anatomical structure formation involved in morphogenesis;anterior/posterior pattern specification;biological regulation;biosynthetic process;cell migration;cell motility;cell proliferation;cell proliferation in forebrain;cellular biosynthetic process;cellular component movement;cellular macromolecule biosynthetic process;cellular macromole…	binding;cation binding;DNA binding;enzyme regulator activity;ion binding;metal ion binding;nucleic acid binding;phosphatase regulator activity	cell part;intracellular membrane-bounded organelle;intracellular organelle;intracellular part;membrane-bounded organelle;nucleus;organelle	anatomical structure development;anatomical structure formation involved in morphogenesis;biological regulation;biosynthetic process;cell motility;cell proliferation;cellular component movement;cellular metabolic process;cellular nitrogen compound metabolic process;cellular process;developmental process;locomotion;macromolecule metabolic process;metabolic process;nitrogen compound metabolic proce…	cell part;intracellular membrane-bounded organelle;intracellular organelle;nucleus;organelle		zf-Di19	AACTTT_UNKNOWN;AAGCACA,MIR-218;ACTGAAA,MIR-30A-3P,MIR-30E-3P;ACTGTAG,MIR-139;AGCYRWTTC_UNKNOWN;AGGAAGC,MIR-516-3P;AGTCTTA,MIR-499;ATACTGT,MIR-144;ATGCACG,MIR-517B;ATGTAGC,MIR-221,MIR-222;BENPORATH_EED_TARGETS;BENPORATH_ES_WITH_H3K27ME3;BENPORATH_NANOG_TARGETS;BENPORATH_NOS_TARGETS;BENPORATH_OCT4_TARGETS;BENPORATH_PRC2_TARGETS;BENPORATH_SOX2_TARGETS;BENPORATH_SUZ12_TARGETS;BMI1_DN_MEL18_DN.V1_UP;B…	3D-structure;Acetylation;Alternativesplicing;Completeproteome;Diseasemutation;DNA-binding;Epilepsy;Hirschsprungdisease;Homeobox;Isopeptidebond;Mentalretardation;Metal-binding;Nucleus;Polymorphism;Referenceproteome;Repeat;Repressor;Transcription;Transcriptionregulation;Ublconjugation;Zinc;Zinc-finger
NaN	NaN	2.70912	NaN	2.79866	2.6226	NaN	NaN	3.06447	3.3129	2.95793	2.21815	2.64767	NaN	2.47491	3.03797	NaN	3.15132	NaN	NaN	NaN	3.06806	NaN	3.30027	3.04071	2.42765	NaN	2.50076	NaN	NaN	NaN	NaN	1.78046	0.613597	2.79866	2.77074	-0.0279255	0.476578	S	3	___1	biological regulation;biosynthetic process;cell cycle arrest;cell cycle process;cell surface receptor linked signaling pathway;cellular biosynthetic process;cellular macromolecule biosynthetic process;cellular macromolecule metabolic process;cellular metabolic process;cellular nitrogen compound metabolic process;cellular process;cellular response to stimulus;macromolecule biosynthetic process;mac…	binding;DNA binding;nucleic acid binding;RNA binding	cell part;intracellular organelle part;intracellular part;nuclear part;nucleoplasm;organelle part	biological regulation;biosynthetic process;cellular metabolic process;cellular nitrogen compound metabolic process;cellular process;macromolecule metabolic process;metabolic process;nitrogen compound metabolic process;nucleobase-containing compound metabolic process;primary metabolic process;regulation of cell cycle;regulation of transport;response to stimulus;RNA metabolic process;signal transdu…	cell part;nucleoplasm		AXH;HMG_box	AACTTT_UNKNOWN;ACCATTT,MIR-522;ACEVEDO_LIVER_CANCER_UP;ACTAYRNNNCCCR_UNKNOWN;AGCATTA,MIR-155;BENPORATH_NANOG_TARGETS;BENPORATH_SOX2_TARGETS;BHAT_ESR1_TARGETS_NOT_VIA_AKT1_DN;BHAT_ESR1_TARGETS_VIA_AKT1_DN;BLALOCK_ALZHEIMERS_DISEASE_UP;BUYTAERT_PHOTODYNAMIC_THERAPY_STRESS_UP;CACGTG_V$MYC_Q2;chr7q22;CSR_EARLY_UP.V1_DN;CTTGTAT,MIR-381;CTTTAAR_UNKNOWN;CTTTGA_V$LEF1_Q2;CTTTGCA,MIR-527;DANG_BOUND_BY_MYC…	3D-structure;Alternativesplicing;Completeproteome;DNA-binding;Nucleus;Referenceproteome;Repressor;Transcription;Transcriptionregulation;Wntsignalingpathway
1.70156	NaN	2.08743	NaN	0.340077	1.11942	-0.247691	-0.425068	2.83162	2.46164	1.28063	NaN	-0.347854	NaN	NaN	1.47632	1.44474	0.628747	0.589504	NaN	NaN	2.80673	0.516271	1.80874	0.276343	-1.30557	NaN	NaN	1.20143	NaN	-0.201776	1.69749	NaN	0.58031	1.28063	0.589504	-0.691126	0.0385398	S	2	___1	cellular component organization;cellular component organization or biogenesis;cellular membrane organization;cellular process;defense response;endocytosis;establishment of localization;immune response;immune system process;inflammatory response;membrane invagination;membrane organization;response to stimulus;response to stress;response to wounding;transport;vesicle-mediated transport	binding;carbohydrate binding;receptor activity	cell part;extracellular membrane-bounded organelle;extracellular organelle;extracellular region part;extracellular vesicular exosome;integral to membrane;integral to plasma membrane;intrinsic to membrane;intrinsic to plasma membrane;membrane part;membrane-bounded organelle;membrane-bounded vesicle;organelle;plasma membrane part;vesicle	cellular component organization;cellular membrane organization;cellular process;endocytosis;establishment of localization;immune system process;membrane invagination;membrane organization;response to stimulus;response to stress;transport;vesicle-mediated transport	cell part;extracellular organelle;organelle;vesicle		fn2;Lectin_C	BERENJENO_TRANSFORMED_BY_RHOA_REVERSIBLY_DN;BERENJENO_TRANSFORMED_BY_RHOA_UP;CASORELLI_ACUTE_PROMYELOCYTIC_LEUKEMIA_UP;chr2q24;CREIGHTON_ENDOCRINE_THERAPY_RESISTANCE_3;DEFENSE_RESPONSE;FLECHNER_BIOPSY_KIDNEY_TRANSPLANT_OK_VS_DONOR_UP;GATTGGY_V$NFY_Q6_01;GOTZMANN_EPITHELIAL_TO_MESENCHYMAL_TRANSITION_UP;GRAESSMANN_APOPTOSIS_BY_SERUM_DEPRIVATION_UP;GRAESSMANN_RESPONSE_TO_MC_AND_SERUM_DEPRIVATION_UP;…	Alternativesplicing;Completeproteome;Directproteinsequencing;Disulfidebond;Endocytosis;Glycoprotein;Lectin;Membrane;Phosphoprotein;Polymorphism;Receptor;Referenceproteome;Repeat;Signal;Transmembrane;Transmembranehelix
2.63188	NaN	NaN	-1.74029	NaN	1.18384	NaN	NaN	NaN	0.782787	NaN	NaN	NaN	NaN	NaN	2.28419	2.99424	NaN	2.38245	2.63397	2.87792	1.90651	0.328478	-0.0862821	NaN	2.68362	2.33221	2.50076	NaN	0.613531	0.164347	4.3943	2.28878	0.496355	1.73402	2.33221	0.598194	0.048179	S	3	___1	axon guidance;biological adhesion;biological regulation;cell adhesion;cellular process;cellular response to stimulus;chemotaxis;locomotion;regulation of biological process;regulation of cellular process;response to chemical stimulus;response to external stimulus;response to stimulus;signal transduction;taxis	binding;protein binding;receptor activity;receptor binding	cell part;integral to membrane;intracellular;intrinsic to membrane;membrane;membrane part;plasma membrane	biological adhesion;biological regulation;cell adhesion;cellular process;locomotion;response to chemical stimulus;response to external stimulus;response to stimulus;signal transduction	cell part;intracellular;membrane;plasma membrane	Axon guidance	Plexin_cytopl;PSI;TIG	AACTTT_UNKNOWN;ALCALAY_AML_BY_NPM1_LOCALIZATION_DN;BASSO_CD40_SIGNALING_UP;BASSO_HAIRY_CELL_LEUKEMIA_DN;BEGUM_TARGETS_OF_PAX3_FOXO1_FUSION_UP;BENPORATH_EED_TARGETS;BENPORATH_ES_WITH_H3K27ME3;BROWNE_HCMV_INFECTION_48HR_DN;CAGCTTT,MIR-320;CAGGTG_V$E12_Q6;CAIRO_HEPATOBLASTOMA_UP;CCAWYNNGAAR_UNKNOWN;CHEN_METABOLIC_SYNDROM_NETWORK;chr12q23;CREIGHTON_ENDOCRINE_THERAPY_RESISTANCE_2;CTTTGT_V$LEF1_Q2;DANG…	3D-structure;Completeproteome;Disulfidebond;Glycoprotein;Membrane;Polymorphism;Referenceproteome;Signal;Transmembrane;Transmembranehelix
NaN	NaN	-0.751221	NaN	NaN	0.231359	NaN	-0.641908	NaN	-0.0243669	0.712219	-1.27221	NaN	NaN	-1.00736	NaN	NaN	NaN	NaN	NaN	NaN	NaN	-0.911304	NaN	-2.16669	0.269154	NaN	0.240295	NaN	0.893286	-1.18053	0.543619	NaN	0.901939	-0.641908	0.240295	0.882202	0.00841592	S	2	___1	biological regulation;biosynthetic process;cation transport;cellular biosynthetic process;cellular component organization;cellular component organization at cellular level;cellular component organization or biogenesis;cellular component organization or biogenesis at cellular level;cellular macromolecule biosynthetic process;cellular macromolecule metabolic process;cellular membrane organization;c…	binding;enzyme binding;lipid binding;phosphatase binding;phosphatidylinositol binding;phosphatidylinositol-3,5-bisphosphate binding;phosphatidylinositol-3-phosphate binding;phosphatidylinositol-4-phosphate binding;phosphatidylinositol-5-phosphate binding;phospholipid binding;protein binding;protein phosphatase binding	cell part;clathrin-coated vesicle;coated vesicle;cytoplasm;cytoplasmic membrane-bounded vesicle;cytoplasmic part;cytoplasmic vesicle;cytosol;early endosome;early endosome membrane;early phagosome;endocytic vesicle;endosomal part;endosome;endosome membrane;extracellular membrane-bounded organelle;extracellular organelle;extracellular region part;extracellular vesicular exosome;extrinsic to membran…	biological regulation;biosynthetic process;cellular component organization;cellular membrane organization;cellular metabolic process;cellular process;establishment of localization;ion transport;macromolecule metabolic process;membrane docking;membrane invagination;membrane organization;metabolic process;multi-organism process;organelle organization;protein transport;regulation of transport;respon…	cell part;cytoplasm;cytoplasmic membrane-bounded vesicle;cytosol;endosome;extracellular organelle;intracellular membrane-bounded organelle;intracellular organelle;membrane;organelle;vesicle		PX	AGUIRRE_PANCREATIC_CANCER_COPY_NUMBER_DN;ATGTCAC,MIR-489;BENPORATH_MYC_MAX_TARGETS;BLALOCK_ALZHEIMERS_DISEASE_DN;BONOME_OVARIAN_CANCER_SURVIVAL_SUBOPTIMAL_DEBULKING;chr6q21;CYTOPLASM;DANG_BOUND_BY_MYC;DAZARD_RESPONSE_TO_UV_SCC_UP;DE_YY1_TARGETS_DN;DIAZ_CHRONIC_MEYLOGENOUS_LEUKEMIA_UP;ESTABLISHMENT_OF_LOCALIZATION;GOLDRATH_ANTIGEN_RESPONSE;GOLDRATH_EFF_VS_MEMORY_CD8_TCELL_UP;GSE10325_CD4_TCELL_VS_…	3D-structure;Acetylation;Alternativesplicing;Chromosomalrearrangement;Completeproteome;Cytoplasmicvesicle;Directproteinsequencing;Endosome;Lipid-binding;Microphthalmia;Phosphoprotein;Proteintransport;Referenceproteome;Transport;Ublconjugation
0.147202	NaN	NaN	NaN	2.28125	-0.316961	-0.873247	-0.582625	NaN	0.952429	NaN	-1.29214	NaN	NaN	NaN	NaN	NaN	NaN	2.52763	NaN	NaN	NaN	0.978455	NaN	NaN	NaN	NaN	NaN	NaN	-1.69637	-2.92209	4.58083	NaN	0.672102	-0.316961	0.978455	1.29542	0.000281381	S	2	___1	actin cytoskeleton organization;actin filament organization;actin filament-based process;biological adhesion;biological regulation;cell adhesion;cell-substrate adhesion;cellular component organization;cellular component organization at cellular level;cellular component organization or biogenesis;cellular component organization or biogenesis at cellular level;cellular process;cytoskeleton organiza…	binding;cytoskeletal protein binding;protein binding;structural constituent of cytoskeleton;structural molecule activity;vinculin binding	adherens junction;anchoring junction;cell junction;cell part;cell-substrate adherens junction;cell-substrate junction;cytoplasmic part;cytoskeleton;cytosol;focal adhesion;intracellular membrane-bounded organelle;intracellular non-membrane-bounded organelle;intracellular organelle;intracellular part;membrane-bounded organelle;non-membrane-bounded organelle;nucleus;organelle	biological adhesion;biological regulation;cell adhesion;cellular component organization;cellular process;cytoskeleton organization;multicellular organismal process;muscle contraction;organelle organization;regulation of organelle organization	cell part;cytoskeleton;cytosol;intracellular membrane-bounded organelle;intracellular non-membrane-bounded organelle;intracellular organelle;nucleus;organelle		SH3_1;SH3_9;Sorb	ACCAAAG,MIR-9;ACTIN_CYTOSKELETON_ORGANIZATION_AND_BIOGENESIS;ACTIN_FILAMENT_BASED_PROCESS;ACTIN_FILAMENT_BUNDLE_FORMATION;ACTIN_FILAMENT_ORGANIZATION;ADHERENS_JUNCTION;AMIT_EGF_RESPONSE_480_HELA;AMIT_SERUM_RESPONSE_20_MCF10A;BASOLATERAL_PLASMA_MEMBRANE;BYSTRYKH_HEMATOPOIESIS_STEM_CELL_QTL_TRANS;CAGCTG_V$AP4_Q5;CAGGTG_V$E12_Q6;CCCNNGGGAR_V$OLF1_01;CELL_JUNCTION;CELL_MATRIX_JUNCTION;CELL_SUBSTRATE_…	3D-structure;Acetylation;Alternativesplicing;Celladhesion;Celljunction;Completeproteome;Cytoplasm;Cytoskeleton;Nucleus;Phosphoprotein;Polymorphism;Referenceproteome;Repeat;SH3domain
NaN	NaN	NaN	NaN	NaN	NaN	NaN	NaN	1.61579	1.184	0.997251	0.601806	NaN	NaN	NaN	NaN	NaN	1.67147	-0.420929	NaN	NaN	NaN	NaN	1.10993	1.76883	NaN	NaN	NaN	1.34517	3.17131	NaN	NaN	NaN	0.779388	1.184	1.34517	0.161174	0.2935	S	2	___1	adherens junction organization;anatomical structure development;biological adhesion;biological regulation;biosynthetic process;brain development;cell adhesion;cell junction assembly;cell junction organization;cell surface receptor linked signaling pathway;cell-cell adhesion;cell-cell junction organization;cellular biosynthetic process;cellular component assembly;cellular component assembly at cel…	binding;cadherin binding;cell adhesion molecule binding;protein binding;receptor binding	adherens junction;anchoring junction;cell junction;cell part;cell projection;cell projection part;cell-cell adherens junction;cell-cell junction;cytoplasm;cytoplasmic part;cytosol;dendritic spine;extracellular membrane-bounded organelle;extracellular organelle;extracellular region part;extracellular vesicular exosome;growth cone;intracellular membrane-bounded organelle;intracellular organelle;int…	anatomical structure development;biological adhesion;biological regulation;biosynthetic process;cell adhesion;cell junction organization;cellular component assembly;cellular component organization;cellular metabolic process;cellular nitrogen compound metabolic process;cellular process;developmental process;macromolecule metabolic process;metabolic process;nitrogen compound metabolic process;nucle…	cell part;cell projection;cytoplasm;cytosol;extracellular organelle;intracellular membrane-bounded organelle;intracellular organelle;membrane;midbody;neuron projection;nucleus;organelle;plasma membrane;site of polarized growth;synapse;vesicle	Adherens junction;Leukocyte transendothelial migration	Arm	AACATTC,MIR-409-3P;AACTGGA,MIR-145;AACTTT_UNKNOWN;ALCALAY_AML_BY_NPM1_LOCALIZATION_UP;ALFANO_MYC_TARGETS;ATGTACA,MIR-493;BENPORATH_CYCLING_GENES;BERENJENO_TRANSFORMED_BY_RHOA_DN;BURTON_ADIPOGENESIS_9;BYSTRYKH_HEMATOPOIESIS_STEM_CELL_QTL_TRANS;CAGGTG_V$E12_Q6;CCAWYNNGAAR_UNKNOWN;CCTGTGA,MIR-513;CHIARETTI_ACUTE_LYMPHOBLASTIC_LEUKEMIA_ZAP70;chr11q12;COULOUARN_TEMPORAL_TGFB1_SIGNATURE_DN;CREIGHTON_EN…	3D-structure;Acetylation;Alternativeinitiation;Alternativesplicing;Celladhesion;Cellmembrane;Coiledcoil;Completeproteome;Cytoplasm;Membrane;Nucleus;Phosphoprotein;Polymorphism;Referenceproteome;Repeat;Transcription;Transcriptionregulation;Wntsignalingpathway
[truncated: 6,493 more rows]
[truncated: 26 more columns]

## Sheet: 239 phosphosites
LOW-RISK	LOW-RISK	LOW-RISK	LOW-RISK	LOW-RISK	LOW-RISK	LOW-RISK	LOW-RISK	LOW-RISK	LOW-RISK	LOW-RISK	LOW-RISK	LOW-RISK	LOW-RISK	LOW-RISK	LOW-RISK	LOW-RISK	LOW-RISK	HIGH-RISK	HIGH-RISK	HIGH-RISK	HIGH-RISK	HIGH-RISK	HIGH-RISK	HIGH-RISK	HIGH-RISK	HIGH-RISK	HIGH-RISK	HIGH-RISK	HIGH-RISK	HIGH-RISK	HIGH-RISK	HIGH-RISK
P101	P110	P116	P118	P120	P125	P127	P131	P137	P138	P139	P141	P142	P143	P144	P153	P154	P155	P105	P107	P112	P114	P115	P117	P122	P123	P124	P128	P129	P130	P133	P134	P140	p-value	Median LOW-RISK	Median HIGH-RISK	FC HIGH-RISK/LOW-RISK	FC significance	p-site
-2.45032	-2.69344	-3.84241	-1.49654	NaN	-3.9003	-2.46577	NaN	-2.73688	NaN	NaN	NaN	NaN	NaN	NaN	NaN	NaN	-3.19483	-0.216596	NaN	-2.67941	0.0238587	0.688724	0.586616	-0.668604	NaN	NaN	-4.64331	-1.87113	NaN	NaN	NaN	NaN	0.0347871	-2.71516	-0.4426	2.27256	1.32234e-09	KIAA1462_S1044
-0.62692	-2.34277	1.76393	1.09349	-1.8821	-0.787594	-1.92396	NaN	NaN	NaN	-1.50904	1.77363	-1.45922	NaN	-1.03841	NaN	NaN	-0.492535	NaN	NaN	NaN	1.18022	1.87937	1.0271	1.80977	-1.91131	0.0993495	NaN	NaN	2.33433	1.08451	NaN	1.36161	0.0135235	-0.913004	1.18022	2.09322	1.97788e-08	CEP68_S472
-0.62692	-2.34277	1.76393	1.09349	-1.8821	-0.787594	-1.92396	NaN	NaN	NaN	-1.50904	1.77363	-1.45922	NaN	-1.03841	NaN	NaN	-0.492535	NaN	NaN	NaN	1.18022	1.87937	1.0271	1.80977	-1.91131	0.0993495	NaN	NaN	2.33433	1.08451	NaN	1.36161	0.0135235	-0.913004	1.18022	2.09322	1.97788e-08	CEP68_S478
-2.03876	NaN	NaN	NaN	-1.93715	NaN	NaN	NaN	NaN	0.538769	-2.15134	-2.93034	NaN	NaN	-2.34278	NaN	NaN	0.0155075	NaN	-1.35466	0.294227	0.25215	-0.296931	NaN	1.41097	0.259129	-1.27611	-1.09691	NaN	2.99037	-1.65726	NaN	NaN	0.0415293	-2.03876	-0.0223905	2.01637	5.92014e-08	CTNNB1_S552
NaN	NaN	-1.02296	0.0755224	NaN	-0.541495	-2.44475	NaN	-3.09294	NaN	NaN	-3.41727	-1.01324	NaN	NaN	NaN	NaN	-2.08732	NaN	NaN	NaN	-0.572428	1.34996	-0.276759	NaN	-0.526465	1.35221	-1.36306	NaN	1.1276	1.62597	NaN	NaN	0.00449503	-1.55514	0.42542	1.98056	9.7422e-08	SP3_S554
[truncated: 234 more rows]
