# Supplementary material for: Biological characteristics of aging in human acute myeloid leukemia cells: the possible importance of aldehyde dehydrogenase, the cytoskeleton and altered transcriptional regulation
Source: Aging (Albany NY). 2020 Dec 20;12(24):24734–77. doi: 10.18632/aging.202361 (PMC7803495; doi:10.18632/aging.202361)
Supplement: Supplementary File 5 [file aging-12-202361-s012.xlsx]

## Sheet: pTyrdata_5VV_output_LIMMA
Supplementary File 5. pTyr_Phosphoproteomic quantification of 5 high-risk and 6 low-risk patients.
id	Mean of log A (high-risk)	Mean of log B (low-risk)	Sds	qvalue BvsA	PHOSPHOSITE	FC high risk vs low-risk
1	0.015561487	-0.513472781	0.606760725	0.572584501
2	0.233996826	0.081774626	0.44192067	0.739710245
3	-4.01508812	-5.076406558	1.489937522	0.630516146
4	0.386095709	0.605988854	0.542992204	0.722825233
5	-0.866560024	-1.253522026	0.491870933	0.614316898
6	-1.472413468	-1.275707314	0.399506647	0.693014308
7	0.912527287	0.655203582	1.173641402	0.759720757
8	0.755539823	1.89004315	1.116502687	0.509741474
9	0.060472893	1.095055741	1.503716916	0.649637977
10	-0.089824897	1.160715585	1.377396359	0.539805785
11	0.264548117	0.401419759	0.321183984	0.703477889
12	-0.48656542	-0.263879299	0.400963838	0.679653675
13	-0.109766061	-0.03344283	0.4849962	0.778518254
14	-0.456455588	-0.956968953	1.217398073	0.709458129
15	-0.510767889	-0.563417624	0.455145216	0.796152953
16	0.207554317	1.878592134	2.686673316	0.671281619
17	0.385914689	0.726267257	0.523438851	0.654176403
18	-0.124994356	0.102984454	0.370450292	0.662999095
19	-0.331596489	0.591867882	0.805031336	0.505163842
20	-0.765696225	-0.403308383	0.502555502	0.638238499
21	-0.37848458	-0.868055307	1.068610134	0.699528183
22	0.572925657	0.39492822	0.32407689	0.687004994
23	-0.8774589	-1.137991955	0.437912599	0.671281619
24	-0.979524428	-1.030038372	0.679752886	0.809664649
25	-1.882142872	-2.589174628	0.819723832	0.558296239
26	1.292466807	1.339761754	0.451113965	0.800387106
27	0.87105006	1.09030806	0.446092421	0.693014308
28	0.622982217	1.59054923	0.726723747	0.452600626
29	-1.322120176	-1.760426164	0.575918285	0.626123492
30	-0.858894202	-0.338059469	0.617340869	0.565785719
31	1.406418133	0.838241467	0.518607602	0.509741474
32	2.622459578	3.579528769	0.753094206	0.446741129
33	0.090605693	0.004871669	0.480117232	0.774186325
34	-0.271450464	-0.115143415	0.345281796	0.699832864
35	0.752282405	1.029715225	0.477619187	0.671488059
36	0.256445795	0.184269961	0.312534004	0.758322351
37	-0.528020901	-0.095933025	0.602091017	0.630026545
38	-0.505639875	-0.057741427	0.444533299	0.509741474
39	-0.512596721	-0.910654086	0.799907469	0.689278548
40	-1.715829182	-1.304620755	0.483324194	0.581665574
41	-0.95675484	-0.745075079	0.628210866	0.740804579
42	-1.234297669	-2.182895067	1.092081175	0.574918734
43	-2.032806885	-1.279629377	0.972508829	0.605879414
44	1.545961666	1.49286891	1.039431308	0.817567952
45	1.871946573	1.674272528	0.785425964	0.758296832
46	0.455510795	1.24145183	0.755293137	0.509741474
47	-0.298237026	-0.859780843	0.831210073	0.642676843
48	0.29541946	0.418628029	0.392840853	0.750208432
49	0.909865099	0.803995992	0.349396478	0.750208432
50	0.063308661	0.536595958	0.352173682	0.418464681
51	-1.260371533	-1.408848345	0.635919646	0.758322351
52	-1.090407968	-0.827810109	0.40937444	0.666562228
53	0.911014175	1.38900553	0.785122978	0.671488059
54	-0.333271661	-0.418068762	0.372317406	0.759720757
55	0.63320784	1.033506652	0.429768119	0.526218084
56	0.803999114	0.073521038	0.432912717	0.268105259
57	0.695643304	1.35124286	0.97449153	0.642676843
58	1.24697212	0.845707528	0.594322496	0.642676843
59	0.122475956	0.16204815	0.36858307	0.800387106
60	-1.221420312	-1.249816825	0.345736519	0.806864118
61	-1.200435817	-0.933203168	0.417608518	0.65533532
62	0.645073533	0.188326513	0.453214358	0.509741474
63	-1.886260207	-2.473949234	0.992045969	0.671281619
64	0.763823986	0.585223772	0.573161555	0.748484336
65	0.917522871	0.781227787	0.343765566	0.715251608
66	-0.466951275	-0.653879702	0.554565798	0.740804579
67	0.697909445	0.702081799	0.447516601	0.823360667
68	0.545174858	0.531470589	0.411120673	0.822484038
69	-0.157414828	-0.148332438	0.432590772	0.823247379
70	0.005455768	0.479607036	0.740833562	0.65533532
71	-0.031451647	0.050322119	0.42934991	0.771126044
72	0.813362157	1.453724931	0.629888889	0.509741474
73	-0.250100814	-0.635770001	0.369134993	0.509741474
74	0.007413465	-0.379572361	0.40783243	0.525077202
75	0.02610108	0.418290039	0.437545499	0.561186344
76	-0.352497098	0.041716645	0.622401686	0.65533532
77	-0.817301852	-0.171678152	0.412665816	0.311143041
78	-1.051244831	-0.302350407	0.384520217	0.192084136
79	-0.841584373	-1.351967359	0.691226252	0.635196087
80	-0.943527701	-0.898028356	0.960068962	0.817567952
81	-1.845280051	-1.646690865	0.445647925	0.70111235
82	-0.559863591	-0.393770106	0.349909165	0.699528183
83	0.750765662	1.473017017	0.729022705	0.513464827
84	-0.745727265	-0.167693809	0.776083329	0.630516146
85	0.960621738	0.428122157	0.497740084	0.509741474
86	-0.144559183	-0.182763774	0.305771342	0.794274024
87	0.81246199	0.835823558	0.422813867	0.817567952
88	0.335901714	0.984469851	0.558200286	0.464550885
89	0.566615391	0.209031851	0.483953358	0.617682209
90	-0.366962111	0.105190287	0.642205301	0.618860429
91	-0.202084547	0.07683005	0.465425433	0.671488059
92	0.110036544	0.067021284	0.354408637	0.794625605
93	-0.09537327	-0.627515341	0.432934341	0.458101638
94	-0.420609693	0.00829602	0.458464733	0.525440525
95	-0.286383711	0.191919178	0.297475263	0.292018512
96	-0.636423324	-0.756679142	0.501875897	0.758322351
97	-1.217387985	-0.909597668	0.921863611	0.748484336
98	-0.235942408	-0.442150044	0.351722878	0.671488059
99	0.658976436	0.765646947	0.404580546	0.758296832
100	1.570411193	2.021797558	0.587315572	0.606828882
101	1.291399464	1.606380373	0.740659047	0.703477889
102	2.638203764	3.13306756	0.491478021	0.521448687
103	1.496584231	2.105428701	1.198649579	0.687273218
104	1.302660656	1.741171718	1.35652215	0.748484336
105	0.838863211	0.666712947	0.431552075	0.714405584
106	0.998695698	0.553511	1.036546999	0.71027532
107	-2.310278851	-3.740899343	2.947485054	0.699528183
108	-1.237219298	-0.757653068	1.107223136	0.703477889
109	-0.739933276	-0.815193214	1.118095722	0.812512292
110	0.170495159	0.120155146	0.587447577	0.806423851
111	-1.730119669	-2.086859799	0.828803973	0.709458129
112	-0.671252096	-0.48775478	0.519458364	0.73571083
113	-0.152346092	-0.179932971	0.505060821	0.817567952
114	0.416184345	1.292277138	0.499845987	0.256061155
115	-1.361158803	-3.279693882	1.050836434	0.230296214
116	-1.382123548	-3.266979854	0.817727657	0.152723077
117	3.489824343	2.60068802	0.746952929	0.464550885
118	-1.754315543	-1.746090627	0.510692111	0.823247379
119	-1.754315543	-1.746090627	0.510692111	0.823247379
120	-0.803251946	-0.759173165	0.35794818	0.794408385
121	-1.058047855	-0.79751207	0.510408917	0.687273218
122	-0.339095663	-1.128946843	0.721218758	0.505163842
123	0.159320378	0.28340862	0.590452119	0.766832532
124	0.049072552	0.110174777	0.638194914	0.803568464
125	0.894147763	-0.251855877	1.015725721	0.505163842
126	0.347779655	-0.324450595	0.469195508	0.373638993
127	0.419467898	0.553172913	0.905464911	0.782029007
128	0.007578126	0.017719267	0.284912288	0.822484038
129	-0.086731464	-0.214814504	0.933644266	0.791889973
130	-0.222416083	-0.708292956	0.694007047	0.637552735
131	-0.041461981	-0.670312392	1.597522669	0.717859533
132	-1.110950899	-1.230653296	0.392861632	0.749987246
133	1.594378665	1.529507803	0.895935172	0.808772954
134	-0.10762975	-0.054220877	0.440858483	0.794625605
135	0.573825753	1.153300409	0.708754669	0.578807685
136	0.223483768	-0.00589431	0.358886963	0.65533532
137	1.711825085	1.920279702	0.569287764	0.726992777
138	2.985791516	3.39805452	0.803664473	0.687273218
139	2.471012258	3.180547428	0.517384326	0.428615525
140	0.657575673	0.682153829	1.078416199	0.823247379
141	2.076818871	2.778711637	0.662797536	0.506688247
142	-0.081368437	-0.04218511	0.361408555	0.800387106
143	0.262818808	0.251904212	0.310994506	0.822484038
144	0.236817272	-0.243189473	0.329052928	0.395781782
145	1.803317595	2.195188304	0.684611587	0.671488059
146	2.629166636	2.118948245	1.143500122	0.703477889
147	-1.865712666	-2.382444239	0.516776811	0.525077202
148	-3.342948913	-4.44036994	0.881167756	0.464550885
149	-1.469140029	-2.111807036	0.523139156	0.464550885
150	-0.553378387	-0.681471269	0.54930835	0.758322351
151	0.131706949	0.448542928	0.459274698	0.638238499
152	-0.229026268	-0.234768955	0.520801	0.823247379
153	0.383733484	0.326955065	0.529713546	0.800387106
154	0.693823516	2.279959154	1.216422788	0.458101638
155	-0.975250962	-0.057570763	0.475218553	0.193799758
156	-0.245255172	0.634058565	0.80789538	0.505163842
157	-0.857121757	-0.146805282	0.684582528	0.509741474
158	0.552097446	0.371463802	0.525917647	0.740322812
159	-1.502310294	-1.486794095	0.663853147	0.823247379
160	0.741571534	0.994222244	0.441129381	0.671488059
161	-2.335041619	-0.84262991	1.038204172	0.37005183
162	1.04842571	1.51148809	0.560730636	0.574918734
163	-0.071230939	-0.219935027	0.715672761	0.767392857
164	-0.288313717	0.46591041	0.344059859	0.152723077
165	-1.009315527	-1.027798069	0.603009148	0.82302295
166	2.035141301	1.982949515	0.708274384	0.808482945
167	-0.913096478	-1.674228487	0.807324149	0.525077202
168	1.779365539	2.183009009	0.686547248	0.671488059
169	2.66694839	2.853853655	0.608196708	0.751943507
170	-0.581483156	-1.237125124	0.948732563	0.638238499
171	-1.193752861	-1.306434651	0.641758945	0.773043536
172	-0.677860221	-0.95625752	1.093267996	0.758322351
173	1.613906026	1.672973355	0.572415863	0.800387106
174	0.468966118	-0.110005838	0.911160376	0.668962635
175	-1.168464196	-2.410121838	0.638387696	0.192084136
176	-0.482997474	-1.594780213	0.849904825	0.458101638
177	-1.93838582	-2.558912754	0.504061682	0.458101638
178	-1.62924304	-2.893836419	0.727349922	0.257894082
179	-2.277436209	-2.450767815	0.63896048	0.758160895
180	-1.100432634	-1.366960128	0.529586483	0.687273218
181	-0.085084356	0.044990748	0.419223058	0.748484336
182	0.982329989	0.682768703	0.466111855	0.65533532
183	0.007990199	0.149959935	0.403518584	0.736265103
184	-0.23311204	-0.312591955	0.273244319	0.751943507
185	-0.000670202	-0.200712938	0.343731176	0.671488059
186	0.294875714	-0.18820259	0.394280099	0.458101638
187	-0.41566623	-0.315700859	0.837512917	0.795463285
188	-0.602051571	-0.292586867	0.403024406	0.606828882
189	-1.225918317	-1.007266328	0.517612012	0.703590995
190	-2.595527601	-3.23909378	0.638312807	0.509741474
191	-0.600485705	-0.298807299	0.690133528	0.707570227
192	-0.692218989	-0.938795261	0.757864458	0.748033976
193	-1.201495147	-1.250858843	0.394075889	0.794274024
194	-1.281756839	-1.242651145	0.732897171	0.817567952
195	-2.161416602	-1.78937308	0.530535198	0.636509349
196	-0.104215134	-0.115693339	0.27010054	0.819003116
197	0.314550374	0.164982545	0.335412431	0.703477889
198	-0.260809129	-0.42508659	0.296380981	0.679653675
199	-0.285832363	-0.124973336	0.291743535	0.687004994
200	0.412199466	-0.195695243	0.480159491	0.464550885
201	1.962332964	1.943395803	0.79113472	0.823247379
202	1.419344656	0.689938449	0.878473981	0.594378369
203	-1.457864577	-2.366210461	0.680763813	0.419688297
204	-0.058786649	-0.080686858	0.416165259	0.817567952
205	1.005749212	0.477755199	0.580007867	0.539325586
206	-0.53412958	-0.397730922	0.343196305	0.714868874
207	-0.646554796	-0.769105399	0.593931521	0.767392857
208	-1.331314599	-0.611643165	0.779086775	0.529744775
209	1.330355203	1.543579817	0.366180488	0.671488059
210	0.707544935	1.330012163	0.710139757	0.550487287
211	-0.941755811	-0.745218679	0.713287299	0.758160895
212	-0.767458809	-0.944272737	0.314869705	0.676562822
213	-1.797100162	-1.411866705	0.357939273	0.505163842
214	-0.958266993	-1.41960304	0.467449868	0.513464827
215	0.265485907	0.31654838	0.484186528	0.800387106
216	0.414219667	0.901595126	0.749013938	0.654176403
217	-0.256451218	-0.098071175	0.45251298	0.737104419
218	-0.642038724	-0.674965307	0.409073751	0.806864118
219	-0.344602383	-0.108813838	0.320580192	0.618860429
220	-0.504392088	-0.3143536	0.442609395	0.703477889
221	-0.352471325	0.45135015	0.549243393	0.393941947
222	-1.732156265	-2.538548946	0.675163219	0.464550885
223	-1.22757088	-1.77537783	0.564101038	0.517577917
224	-0.010067005	-0.889578004	0.66507303	0.422086795
225	-0.900014895	-0.828710928	0.588887687	0.794625605
226	-1.583306205	-0.73762547	0.649548462	0.428615525
227	-0.929775035	-0.193432041	0.424649494	0.257894082
228	0.022372769	0.237564323	0.39915606	0.685602111
229	-0.760408053	0.309902189	0.512830034	0.169228006
230	0.015504662	0.527790631	0.633331126	0.582346613
231	1.738848758	1.933860441	0.906018982	0.759720757
232	1.580051893	1.692740893	0.745381843	0.783690277
233	1.1765944	1.287085901	0.839066272	0.791524109
234	-1.322281885	-1.980024795	0.466166424	0.380561931
235	-0.601877531	-1.014963965	0.419493551	0.513464827
236	-0.982801285	-1.76425382	2.405815932	0.748358555
237	-2.199488234	-3.537012935	0.65817117	0.173629419
238	-0.471553979	0.196206247	1.124696759	0.671281619
239	-0.768253001	-1.427688241	0.379400802	0.257894082
240	1.062040339	1.46726594	0.999422882	0.722819982
241	-0.345520843	-0.79489022	0.445431356	0.509741474
242	2.604963088	2.159721148	0.597419299	0.630516146
243	1.795395708	1.469685992	0.556715135	0.671488059
244	-1.564857271	-0.773557301	0.848385976	0.545743748
245	2.950234747	3.623854041	1.126478274	0.671488059
246	0.421408278	1.000277807	0.668414364	0.556310892
247	1.196798497	1.481482277	0.58067817	0.693014308
248	1.310876006	0.584984857	0.573329811	0.464550885
249	-2.344261468	-3.279448676	1.070433514	0.572124976
250	-3.296501684	-4.015535454	1.306600116	0.680781544
251	1.903740704	1.989918391	0.760900668	0.797658716
252	-1.508225417	-0.536892186	0.611485329	0.300962097
253	-0.605576866	-0.614324788	0.510399051	0.823247379
254	-0.327111581	-0.427461862	0.403240827	0.758322351
255	-0.656094974	-0.839760744	0.694138192	0.758296832
256	-0.846418542	-0.697201362	0.583489415	0.758296832
257	1.207550287	1.116912174	0.409758452	0.760792986
258	-2.757966757	-2.498374462	0.51116624	0.696969188
259	1.210011288	1.146432906	0.547111215	0.796152953
260	-0.462410826	0.253890908	0.3112098	0.152723077
261	1.907779837	2.648505688	0.436171442	0.265638997
262	0.845725524	1.418285739	0.37222377	0.365031375
263	-1.385188317	-1.560848927	1.089299095	0.775836149
264	0.589460644	0.390179925	0.465989252	0.703477889
265	0.297587995	0.378610139	0.34020994	0.758322351
266	0.027257691	0.28064289	0.397365703	0.65533532
267	-0.131072167	-0.269475812	0.76455009	0.773162569
268	-2.568978644	-4.377991199	0.600637805	0.107494229
269	-0.293187791	-0.476807013	0.665775244	0.758160895
270	-1.140282476	-0.845272982	0.446843814	0.657933933
271	-1.138804334	-0.887473601	1.387479914	0.77125813
272	0.754820797	1.023264905	0.660108009	0.712846205
273	-1.127228463	-1.27445962	0.28325015	0.687273218
274	-0.763989577	-0.333664558	0.714319942	0.671488059
275	0.762108125	-0.29333601	0.688400375	0.36565025
276	-1.200355351	-1.195095748	1.135213516	0.823360667
277	1.102428615	0.875776698	0.313119053	0.626617489
278	0.511548293	-0.103910507	0.432083586	0.41424375
279	-0.503889158	-1.084775915	0.843256615	0.638238499
280	-0.604537995	-1.298197453	0.88478922	0.602132859
281	-0.344725078	-0.908733897	0.827302198	0.641138022
282	-0.098842588	-0.216988539	0.326396685	0.730883134
283	-0.213099713	-0.555672997	0.539798194	0.668962635
284	0.21362254	0.580153188	0.688328977	0.687273218
285	-0.950621939	-0.900499797	0.604829465	0.806864118
286	0.560286045	1.27889204	0.845860218	0.562533628
287	1.763251316	2.591402809	0.941023515	0.548535175
288	-3.248492026	-3.620428046	0.981439893	0.723919931
289	0.489537629	0.21459498	0.916783678	0.752792013
290	1.048172164	1.061845412	0.353011621	0.82089763
291	0.540816656	0.720424685	0.476243701	0.731042459
292	-0.669053763	-1.127438903	0.379186844	0.475675822
293	1.254384589	1.333069861	0.565737929	0.791407468
294	0.163754505	0.231925178	0.836462483	0.806864118
295	0.636969808	1.413226784	0.424309459	0.230296214
296	0.480531749	0.235885973	0.368991864	0.648498821
297	0.845249045	0.431495176	0.363653493	0.505163842
298	-0.386434337	-0.064074459	0.303957781	0.506688247
299	0.554713394	-0.215719092	0.622084537	0.464550885
300	0.914211097	0.214625755	0.583613063	0.483295438
301	0.020055541	-0.428987918	0.314241113	0.374349413
302	0.283163709	0.116140805	0.446791756	0.725384454
303	1.158849478	0.527411643	0.481048325	0.458101638
304	-0.440845499	-0.129826213	0.559252494	0.679653675
305	-0.279442582	-0.403260326	0.319324107	0.726808774
306	-0.899551406	-0.770043031	0.782081082	0.774186325
307	0.799726745	0.705874835	0.436474139	0.759720757
308	-0.241555683	-0.265244433	0.451719126	0.817567952
309	-0.641100681	-0.916717199	0.603736084	0.699528183
310	-3.017154884	-4.217839956	1.100136244	0.505163842
311	-0.755907983	-0.813124263	0.367586543	0.782029007
312	0.545668011	-0.619097563	0.720619132	0.286856975
313	-0.963392318	-0.659003139	0.413051406	0.636509349
314	-1.276113679	-2.999399519	0.928171256	0.256061155
315	-0.464716291	-0.163032606	0.635927387	0.699528183
316	-1.393433142	-1.917747378	0.650500079	0.583647618
317	0.83451348	0.844762519	0.555716	0.823247379
318	-0.34548412	-0.28486454	0.36200682	0.774186325
319	-1.516545641	-1.322455049	0.620805166	0.748484336
320	0.789217734	0.831083378	0.888090896	0.817567952
321	0.022460925	0.509599427	0.457776058	0.506688247
322	0.315985353	-0.002113581	0.316288595	0.509741474
323	1.105865503	0.816832816	0.450649081	0.65533532
324	-0.091651544	0.035722544	0.684855564	0.771126044
325	0.228318153	0.13604042	0.336447375	0.758160895
326	-1.175125182	-1.295784503	0.676365137	0.772063545
327	-0.368789853	-0.535416715	0.321826142	0.687273218
328	-0.355704895	-0.818665286	0.364574014	0.446741129
329	-0.425309348	-0.608869588	0.38393857	0.699528183
330	1.952771568	1.134851451	0.530642816	0.322856996
331	1.635602593	0.340959552	0.539193878	0.152723077
332	-0.959813648	-1.144731909	0.354297066	0.687273218
333	-0.810497483	-1.105261157	0.438650881	0.642676843
334	1.623268437	1.967944145	0.365230731	0.525077202
335	0.392933923	0.574054825	0.399227679	0.703477889
336	-0.661673911	-0.655681554	0.757648187	0.823360667
337	0.443570542	0.434369373	0.532963179	0.823247379
338	0.371813375	1.380131001	0.663238156	0.333880993
339	-0.434900099	-0.597599449	0.340350448	0.699528183
340	1.415029252	1.686056423	0.543232179	0.699528183
341	2.129974461	1.647226357	0.389779707	0.464550885
342	0.294551241	0.138946091	0.383654038	0.712846205
343	0.153965188	0.841700434	0.381228917	0.237096554
344	0.041598843	0.311152566	0.31933678	0.565785719
345	-0.62712768	-0.559822786	0.577514349	0.796152953
346	-0.056322634	0.237641218	0.398891108	0.618286177
347	0.269925907	0.636653299	0.341787084	0.505163842
348	0.629037333	1.296069694	0.68128573	0.526218084
349	-0.7872826	0.547252339	0.57334385	0.153795592
350	-1.105757184	-2.113160789	0.686159204	0.363152666
351	-0.401808584	-0.803415408	0.968048593	0.707570227
352	-1.285238185	-1.84289813	0.56311823	0.513464827
353	1.181849551	2.058710933	1.076522994	0.580108455
354	-0.604959315	-0.19108357	0.578118665	0.630026545
355	-0.049862188	-0.040680191	0.282075853	0.822529855
356	-0.710580301	-1.041237926	0.353055042	0.545743748
357	-0.405183348	-0.263271508	0.326490616	0.703477889
358	-0.099421599	-0.052984424	0.664951041	0.810690601
359	-0.446286571	-0.129153828	0.796657951	0.714405584
360	-1.254189521	-1.900184373	0.839193195	0.606828882
361	1.179612219	1.344480232	0.515230876	0.748484336
362	-0.485438725	-0.264518723	0.418922266	0.687004994
363	-0.780457205	-0.120463591	0.482264556	0.405196719
364	-0.012250561	1.712772822	0.73767822	0.152723077
365	0.259374002	0.162831987	0.436457115	0.759720757
366	-0.504553007	-0.653421104	0.376674337	0.71623042
367	0.858699971	0.543603433	0.462825135	0.641138022
368	-1.488908064	-1.386260043	0.602337592	0.774186325
369	0.007986858	-0.171151735	0.554901584	0.748945367
370	1.357662105	2.225521187	0.952881543	0.539325586
371	0.493862136	1.029747004	0.720323441	0.614316898
372	0.365887444	1.135714551	0.740803465	0.509741474
373	1.106250775	1.574549278	0.812900488	0.671488059
374	1.346416032	2.174117883	0.658676756	0.454321866
375	1.125235629	1.2515122	0.685191054	0.77125813
376	1.054895228	1.650477171	0.676647065	0.548535175
377	1.305334127	2.138917208	0.518910142	0.292018512
378	1.519580516	2.232186199	0.692541554	0.509741474
379	0.218705255	1.411632185	0.652137406	0.230296214
380	1.115280843	2.269086699	0.513109459	0.152723077
381	-1.505227137	-0.371994009	0.956681161	0.464550885
382	1.713964737	0.941730132	0.82238516	0.525077202
383	-0.746594888	-1.088267456	0.520373402	0.649637977
384	0.649662909	0.899179965	0.709923541	0.736338921
385	1.339208132	2.49359867	0.736695881	0.311143041
386	2.302192593	3.288675864	0.692585304	0.376085609
387	-0.215290561	-0.024232436	0.516713351	0.73571083
388	-0.410546435	-0.085546894	0.558029124	0.671488059
389	-0.190051627	0.19626687	0.557393858	0.638238499
390	0.181123504	0.511266326	0.503877416	0.649637977
391	-1.720309925	-2.471294026	0.484115407	0.31965851
392	-0.089091384	0.414974968	0.567719216	0.545743748
393	-0.131510711	0.513601294	0.575550323	0.492483494
394	-0.341189215	0.491669223	0.655581338	0.446741129
395	0.233059207	0.042226358	0.332082081	0.671488059
396	-2.45564754	-2.982171635	0.641048693	0.578230515
397	-0.031451126	0.173227945	0.440435762	0.701855366
398	-0.165557662	0.005002419	0.449847493	0.723919931
399	-0.343397036	0.392312318	0.865597554	0.582117052
400	0.894231001	0.30986605	0.411424276	0.378680681
401	-1.507768977	-1.209015489	0.462989987	0.65533532
402	-0.945324028	-1.061587562	0.378772201	0.748945367
403	0.087057871	-0.223611133	0.598761023	0.687273218
404	-0.63118805	-0.761317772	0.467020029	0.757233981
405	-0.716547543	-1.344274362	0.57090039	0.505163842
406	1.648196316	0.653790562	0.444172874	0.152723077
407	-1.44842062	-1.459777852	0.43176548	0.823247379
408	0.42214847	0.073362925	0.801269912	0.703477889
409	0.294452488	0.662442899	0.402445764	0.538004515
410	-0.461853933	-0.410720504	0.28385198	0.77125813
411	-0.278134938	-0.131200919	0.280822552	0.687273218
412	-1.328240311	-1.861387253	0.510524721	0.509741474
413	-0.154260203	-0.146930939	0.514258625	0.823247379
414	-0.89142428	-0.793075025	0.425829762	0.759720757
415	-1.161964905	-1.559661816	0.514712209	0.60606808
416	-1.733956325	-2.617230296	0.643464436	0.401925234
417	0.327235602	0.070001531	0.593874465	0.703477889
418	-0.215460844	-0.338725484	0.579087574	0.760792986
419	-0.052276254	0.007859317	0.324473932	0.771126044
420	0.099086669	-0.185399357	0.717173422	0.723919931
421	2.210588503	2.520630837	0.653640206	0.699528183
422	3.492005873	2.913430492	0.503298695	0.475012239
423	0.936202842	0.956153382	0.541403233	0.821746053
424	-0.679986985	0.135964391	0.642245272	0.446741129
425	2.103530908	1.929428558	0.672677371	0.758296832
426	-0.451215983	-0.759955166	0.663549938	0.699528183
427	0.343253127	-0.636562467	1.051118301	0.526218084
428	-0.364523285	-0.256523468	0.302769214	0.734276858
429	-0.187822515	-0.050125927	0.539636938	0.758296832
430	-0.910926664	-0.300769037	0.597392325	0.517577917
431	-0.364105208	-0.272386129	0.553785817	0.774186325
432	0.179894438	0.441176782	0.513658963	0.687273218
433	-2.720239782	-3.461173487	0.443355394	0.302775551
434	-0.84900077	-0.529981904	0.564535613	0.676361068
435	-0.692649502	-1.119545177	0.581041487	0.618922938
436	-1.720619846	-1.393694496	0.587501601	0.687004994
437	-0.59954555	-0.683692644	0.807175248	0.800387106
438	-0.25132656	0.03996974	0.71307112	0.712079857
439	-0.35610609	-0.206544088	0.349779438	0.703477889
440	0.663104434	0.475233016	0.950415766	0.767392857
441	-0.537904406	-0.519729724	0.276883718	0.812512292
442	0.139233723	0.546684076	0.672931968	0.668962635
443	-0.12061576	0.199664103	0.368564986	0.555389042
444	-1.251632011	-1.885945535	0.575264072	0.509741474
445	-2.487694264	-3.038527489	0.486632728	0.505163842
446	-0.315151394	-0.165608755	0.481483707	0.748484336
447	0.400070724	-0.284945744	0.927772748	0.635196087
448	-1.435830069	-1.554464559	0.459168199	0.758296832
449	1.086934942	1.592557718	0.551895652	0.536298353
450	0.089418596	0.046021401	0.326144875	0.791407468
451	-1.379866767	-1.628675441	0.507739717	0.693014308
452	1.701961565	2.123630405	0.816434601	0.687273218
453	1.61192736	1.672333574	0.889972919	0.812512292
454	2.406603861	2.87976865	0.664222311	0.630516146
455	0.873321509	0.643395202	0.455045705	0.687273218
456	-0.9904091	-0.787154657	0.379140879	0.686356506
457	0.52385943	0.45317772	0.395974351	0.772063545
458	-0.455995357	-0.662876467	0.516489948	0.714351458
459	-0.611505257	-0.680289534	0.728299172	0.803416401
460	0.560878454	1.597054298	0.586178004	0.25219409
461	-0.126274684	0.803686092	0.5695099	0.286856975
462	0.192519313	0.425018743	0.510087788	0.699528183
463	-0.322821364	-0.042166436	0.43688849	0.65533532
464	-0.992219412	-0.72647745	0.481236785	0.687004994
465	-0.513684848	-0.206615193	0.409003241	0.630026545
466	-0.921613324	-0.521760742	0.853855237	0.699528183
467	-0.061422017	-0.277556605	0.327210193	0.648654549
468	0.493773892	0.410674064	0.420638957	0.767392857
469	-0.572790941	-0.621827153	0.366784276	0.791407468
470	-0.926587391	-0.444844639	0.40074047	0.464550885
471	-0.033583863	0.370677772	0.668351066	0.668962635
472	0.311219186	0.054971799	0.72501425	0.73571083
473	0.490469718	0.5264015	0.318719579	0.797658716
474	0.308841884	-0.678523669	0.784952229	0.464550885
475	-0.555976489	-1.786986274	0.874894373	0.380561931
476	-1.884993291	-2.507063961	0.415966636	0.378680681
477	-1.499439067	-3.147287254	1.823849294	0.539805785
478	0.658723283	0.780129016	0.299642107	0.712846205
479	-0.787669766	-0.208909192	0.522585819	0.501239991
480	0.105443458	0.690740829	0.336513872	0.257894082
481	0.778130102	1.095320528	0.468006568	0.642676843
482	0.119069558	0.386449323	0.493596424	0.685602111
483	-0.005720658	-0.32079742	0.665018664	0.699528183
484	-0.368339822	0.221566883	0.623142701	0.539805785
485	1.922449279	2.287677606	0.4902967	0.614316898
486	1.794559431	1.944638753	0.555640591	0.758296832
487	-0.572774568	-0.002670212	0.749612165	0.626190488
488	0.397551136	0.888984447	0.518865088	0.525077202
489	2.294115067	2.765586019	0.47895236	0.513464827
490	0.159412312	0.295166351	0.459114146	0.750896695
491	0.340057471	-0.043245167	0.288887349	0.454042305
492	0.069958085	0.0032283	0.38524156	0.774186325
493	-0.443589639	-0.699561859	0.453614414	0.676361068
494	-1.843008304	-3.806121206	0.726611971	0.152723077
495	-0.748016521	-0.329833787	0.482511672	0.556154608
496	1.140553463	1.644879818	0.47677264	0.506688247
497	1.096997738	1.644879818	0.483712016	0.483295438
498	-0.839320755	-0.830649656	0.325241144	0.823247379
499	0.036302707	-0.6834061	0.355768393	0.174606335
500	0.325978862	0.39155847	0.413007625	0.781270225
501	-0.877616113	-1.098128776	0.691073345	0.748484336
502	-0.430524525	-0.501047386	0.388911782	0.773146249
503	0.297989059	0.889488039	0.600157831	0.513464827
504	-0.209592892	0.022284376	0.44700429	0.687273218
505	-0.472294822	-0.120452004	0.413411451	0.561186344
506	-1.48796885	-1.10375234	0.587142078	0.650260258
507	-0.050544387	0.042691933	0.305113644	0.749595334
508	-0.430364251	-0.01561291	0.395582398	0.509741474
509	1.424336362	1.911638041	0.55204518	0.546303752
510	-0.746576691	-0.593631546	0.391302284	0.71927664
511	0.262069131	-0.434082035	0.512885944	0.408971724
512	-0.611617875	-0.840157713	0.452798733	0.687273218
513	-1.662972891	-2.253031989	0.648413535	0.539325586
514	0.16811275	0.532987854	0.407234476	0.561186344
515	0.140665697	0.068138041	0.367735173	0.771126044
516	0.082729558	0.191045049	0.400435135	0.758160895
517	-0.331791424	-0.136190301	0.340509787	0.682920542
518	-0.040491788	0.128239555	0.322008551	0.687004994
519	-0.235355435	-0.250042728	0.403168286	0.822484038
520	-0.579757599	-0.369147755	0.406943135	0.687273218
521	-1.16307286	-1.06735751	0.450104147	0.765013245
522	0.76741637	0.976239467	0.346625439	0.671488059
523	0.455145207	0.231676714	0.327817735	0.654176403
524	-0.198987749	0.364160046	0.491048443	0.505163842
525	0.833291119	1.060265204	0.380617031	0.671281619
526	-0.308803248	0.073770667	0.575724927	0.647911519
527	0.789972276	1.285676288	0.505685452	0.526218084
528	-0.4814249	-0.629207423	0.400855025	0.726808774
529	2.738988948	2.441685081	0.587036578	0.687273218
530	1.990530252	1.601427365	0.750133681	0.687273218
531	-0.093960364	0.458572646	0.903869454	0.671488059
532	1.172434795	1.460434119	0.42184373	0.641138022
533	-0.69262408	-1.324590349	0.476401176	0.454042305
534	0.079954332	0.633790833	0.539387475	0.509741474
535	-0.252178064	-0.190782715	0.329034517	0.771126044
536	-1.631812048	-2.287966728	0.521383741	0.454042305
537	-0.703049362	-0.296978378	1.072142843	0.730883134
538	-0.995978951	-0.176438522	0.841105943	0.528203752
539	-1.098137522	-0.42429539	0.864101744	0.60283976
540	0.85268355	1.017658603	0.354895259	0.701855366
541	-0.176038967	0.423338126	0.804010724	0.614316898
542	0.140727442	0.164759846	0.464993545	0.817567952
543	-0.305874994	0.389328802	0.798326499	0.555389042
544	-0.218115896	0.340926523	0.832592341	0.642676843
545	0.107243893	0.208845852	0.501945322	0.765621955
546	0.709284699	1.118818005	0.6104255	0.642676843
547	-0.166182232	0.049434722	0.694819688	0.748484336
548	-0.158981022	-0.298131919	0.329810563	0.703867957
549	0.443706632	0.304511696	0.876610782	0.781270225
550	1.529672223	1.726946831	0.738574077	0.758296832
551	-1.321944037	-0.934572205	1.007348874	0.722825233
552	-0.286118984	0.10480508	0.439881416	0.564147176
553	0.183526215	-0.195679803	0.402505741	0.525077202
554	0.090235123	-0.194165069	0.389480371	0.624397926
555	-0.651979767	-0.247212231	0.39835289	0.509741474
556	0.165761492	0.497684906	0.411273659	0.583042297
557	0.520824724	0.675335065	0.451140149	0.740322812
558	-0.199339351	-0.000556027	0.363273047	0.683099704
559	0.222400144	0.332799795	0.281647237	0.718148166
560	-1.010824501	-1.350848258	0.424511451	0.607437005
561	-2.444332314	-2.192267537	0.508613425	0.699528183
562	-1.478234756	-3.348282318	0.699601201	0.129176163
563	0.567621572	0.412730852	0.542888176	0.758160895
564	-0.78811425	-0.914050144	0.412924075	0.751943507
565	1.370076788	1.218165731	0.376445522	0.722825233
566	-0.161476773	-0.227950438	0.303397491	0.759720757
567	-0.451265198	-0.490290734	0.447744732	0.805088971
568	0.085946423	-0.19064146	0.268164022	0.509741474
569	1.256503105	0.620319525	0.488954918	0.428615525
570	0.565955567	0.7541754	0.294243265	0.65533532
571	0.567946863	0.400344934	0.307694932	0.687273218
572	-1.932232726	-1.563110137	0.884666019	0.714405584
573	-0.046686841	0.291483229	0.570898913	0.671281619
574	0.448091161	1.181013559	0.773196913	0.525077202
575	-1.113729048	-1.059611797	0.292037597	0.771126044
576	-1.06269567	-1.113571534	0.292412563	0.773146249
577	-0.811779737	-1.047001034	0.33789825	0.637898371
578	-2.591368866	-2.877705018	0.676531162	0.703477889
579	1.633078325	1.808836132	0.653210447	0.758160895
580	-1.842580244	-2.246311593	0.901531113	0.703477889
581	0.356106842	-0.537986313	0.950773128	0.525077202
582	0.332112569	-0.532943134	0.920950822	0.525077202
583	0.463693817	1.020849635	0.40795044	0.405196719
584	0.116497649	0.28500323	0.483076796	0.740804579
585	-0.134918609	-0.12535673	0.371867146	0.823247379
586	0.270380259	0.25337206	1.206684037	0.823247379
587	-0.614067859	0.017256847	0.445275694	0.378680681
588	0.484032123	0.390665434	0.486945953	0.77125813
589	0.349254209	0.293394141	0.464746093	0.794806552
590	1.098676592	1.597442061	0.606550828	0.577575784
591	-1.530204558	-0.725395071	0.533283568	0.374349413
592	0.627515936	0.285719146	0.335589512	0.509741474
593	0.78930468	0.790936803	0.433256974	0.823675244
594	-0.022265637	-0.376729738	0.488483212	0.626123492
595	-0.677118933	-1.394873262	0.348992223	0.172698061
596	-0.84697665	-0.432450898	0.409167687	0.509741474
597	-0.674068916	-0.813662696	0.46542705	0.752792013
598	-1.165560222	-1.58206436	0.543103465	0.606828882
599	-0.500961575	-0.332575579	1.122408042	0.781979349
600	0.02179267	0.25774112	0.372969819	0.65533532
601	0.038735717	-0.051397499	0.372813957	0.758322351
602	0.496559883	0.883455704	0.49570087	0.60283976
603	-3.16899305	-3.499183697	2.297530159	0.78947851
604	-0.414793354	-0.93314967	0.533558916	0.517577917
605	-0.029765704	-0.450876291	0.583432624	0.626617489
606	0.82691381	1.667358458	0.653700081	0.441781585
607	-0.461670834	-0.576600736	0.286498661	0.714351458
608	-0.257712796	-0.282541616	0.36800957	0.812512292
609	-0.333056425	-0.266189865	0.501774268	0.791407468
610	-0.502584985	0.378575103	0.350097134	0.152723077
611	0.551202369	1.538749945	0.426641161	0.156374616
612	0.246399909	0.703013648	0.520113974	0.549657547
613	-0.105796225	0.021764921	0.277840447	0.699528183
614	0.090989804	0.113243458	0.505517503	0.819003116
615	-0.282115179	-0.495006258	0.458512847	0.699528183
616	-0.690911251	0.25311117	0.54577878	0.286856975
617	-0.220505053	-0.157003931	0.304762229	0.762603363
618	-0.020803603	-0.094836878	0.268466987	0.758160895
619	1.239586592	0.830925375	0.715363059	0.671488059
620	-0.041572811	-0.10555046	0.323073525	0.767392857
621	0.019392642	0.518707877	0.516090628	0.519187949
622	-0.759078717	-2.130425175	0.535310321	0.152723077
623	-0.728018296	-1.479941523	0.393081466	0.237096554
624	0.41858882	-0.562612647	1.792617473	0.683099704
625	1.062609589	0.92415604	0.449240106	0.748945367
626	-0.744516492	-0.774405157	0.308689278	0.801735229
627	-0.277197883	0.13527431	0.381341934	0.509741474
628	0.006536046	-0.79636364	0.716380769	0.506688247
629	0.940758783	0.945420693	0.994020543	0.823360667
630	1.042293096	1.051765984	0.46588371	0.823247379
631	-0.038907033	-1.318250591	0.696635708	0.257894082
632	0.0828555	0.033499462	0.462649164	0.800387106
633	-0.105406451	0.121044321	0.558631186	0.712846205
634	-0.101999791	-0.317249209	0.378323731	0.67265314
635	1.320048761	1.575061798	0.456052882	0.678323501
636	-1.196910048	-0.848216871	0.341675141	0.509741474
637	-0.923073751	-0.462116083	0.299528783	0.322856996
638	-1.442566049	-1.456482753	0.652750643	0.823247379
639	-0.214456543	-0.443812197	0.461809834	0.689605176
640	-0.355325058	-0.037579409	0.38890349	0.578807685
641	-0.021448711	0.193546779	0.373741205	0.671488059
642	-0.166875052	0.135803161	0.366284934	0.574918734
643	-0.268700336	-0.743571779	0.80771262	0.676856989
644	0.080404961	-0.102220357	0.515606394	0.735531283
645	0.039876671	0.294257056	0.316792274	0.585374311
646	0.630964825	0.424730366	0.328963499	0.657933933
647	-0.226651192	-0.363332402	0.350984037	0.720858185
648	0.438757859	-0.828055126	1.467810184	0.558290977
649	-0.335483754	-0.427880821	0.44739832	0.762603363
650	-1.028597647	-1.400463414	0.455927334	0.605081595
651	0.149932263	0.266238948	0.615867669	0.771126044
652	1.039279872	1.336186399	0.520793375	0.671488059
653	-0.172950721	-0.350284515	0.819912511	0.759720757
654	-0.426415774	-0.528332095	0.29092757	0.737093128
655	0.025738899	-0.152659293	0.274347399	0.659828385
656	-1.359988987	-2.022536357	0.62582977	0.506688247
657	-0.379089034	-0.243210834	0.610417066	0.760792986
658	-2.027409577	-2.38920482	0.652356947	0.679653675
659	-1.086279416	-1.11612917	0.538131514	0.817567952
660	-2.442667091	-2.552759528	0.774135232	0.790526157
661	-1.947470832	-3.025576035	0.486265823	0.152723077
662	1.450435579	1.774495761	0.446459326	0.626123492
663	-0.560234183	0.13120064	0.451125018	0.36565025
664	-0.562323549	-0.119028535	0.381015684	0.464550885
665	-0.451915074	-0.15615947	0.443290509	0.646466267
666	-0.411625713	-0.157569202	0.406463261	0.658494929
667	-1.073106957	-1.814385068	0.456206251	0.322856996
668	-0.141075408	-0.029892458	0.497625763	0.75946992
669	-0.363172656	-0.239738147	0.523898798	0.758322351
670	0.595427132	0.936754316	0.418080865	0.578807685
671	-0.810229319	-0.601583342	0.437831116	0.699528183
672	-0.897415215	-0.990017545	0.497515216	0.772346373
673	-0.481584963	-0.272653736	0.354383706	0.671488059
674	-1.470929098	-1.543533802	0.313373571	0.758322351
675	-1.186722732	-0.905276304	0.466570125	0.669631364
676	-0.189757672	-0.128383742	0.506406936	0.796152953
677	0.774344113	1.115191152	0.764790859	0.70111235
678	2.274972892	2.411683281	0.383666108	0.734276858
679	-0.667155391	-1.042493214	0.558762791	0.642676843
680	0.429106949	0.325186462	0.491216472	0.760792986
681	-0.643480122	-0.503570136	0.886126121	0.778226631
682	-0.575543976	0.023749438	0.912467819	0.657933933
683	-1.750649691	-1.313702863	1.176173182	0.735104405
684	-1.138243124	-0.780063546	0.530139018	0.65533532
685	-0.438775146	-0.270136986	0.403998025	0.714405584
686	-0.105731663	-0.198840745	0.454349166	0.763890612
687	-0.494343265	-0.572171067	0.307158285	0.758296832
688	0.871928123	1.039459567	0.442573486	0.723919931
689	-0.409028557	0.124011431	0.337663487	0.302775551
690	-0.37669605	-0.107254126	0.40617865	0.65533532
691	-0.13605752	-0.435801417	0.585161091	0.694095184
692	-0.578887671	-0.016532764	0.390014754	0.368443028
693	0.348653305	1.461860448	0.809886574	0.401925234
694	-0.838160157	-1.492992421	0.682136665	0.520954585
695	-0.162363208	-0.210489133	0.347064526	0.788215306
696	-0.316278264	0.667602304	0.510516179	0.193799758
697	0.324632665	-0.103825999	0.588112498	0.626123492
698	-1.144508505	-0.686370253	0.467546732	0.514759413
699	-0.020750354	0.448976006	0.525647462	0.561186344
700	-0.704277521	-0.29477593	0.65930481	0.671281619
701	-0.07618459	-0.348022036	0.386295708	0.642676843
702	-0.633313495	-0.564848299	0.281864871	0.758322351
703	-0.416941805	-0.41956721	0.295118805	0.823360667
704	-0.240606856	-0.514320518	0.434445443	0.657933933
705	-0.070732813	0.218069693	0.39983164	0.626617489
706	0.433307987	0.218187586	0.438502449	0.693014308
707	-2.219652271	-3.20043118	0.78625817	0.464550885
708	0.445122027	-1.996129175	0.849157793	0.100920895
709	0.876746821	0.881290847	0.532805335	0.823360667
710	0.411235499	0.340313546	0.524215931	0.790916785
711	0.542902635	0.38737641	0.441136888	0.736103964
712	-1.594889569	-1.473733068	0.469672983	0.758296832
713	-1.092436814	-1.216711354	0.401196772	0.750896695
714	-0.330679524	-0.093520283	1.051780294	0.758752739
715	1.180688953	0.723119301	0.752738365	0.66858433
716	0.476332916	-0.373232567	0.586047426	0.401925234
717	-0.991852057	-0.872637068	0.527853373	0.758752739
718	0.583486599	0.833218804	0.571532801	0.703477889
719	0.231000274	0.413913071	0.721117939	0.758296832
720	-1.922856885	-1.595238322	1.20739674	0.758296832
721	-0.56067358	-0.515249241	0.83402025	0.817567952
722	0.642706042	1.646925151	0.409625942	0.152723077
723	1.113657987	1.804606607	0.539212982	0.44375734
724	0.749494851	1.539411581	0.507737181	0.362127755
725	0.061711635	0.626598126	0.44664858	0.464550885
726	0.756817138	0.811226453	0.326164942	0.774186325
727	-0.163680911	-0.500097909	1.157881269	0.751943507
728	-0.058218688	1.216742158	0.553591945	0.152723077
729	-0.643778247	-0.409561516	0.551179167	0.703477889
730	0.48477202	0.915507591	0.669567395	0.665091337
731	0.313230101	1.085981305	0.623372098	0.458101638
732	-0.481283283	-0.782577855	1.199729516	0.758296832
733	-0.456501642	-0.472981046	0.374274847	0.81853495
734	0.671624547	0.221734946	0.484649749	0.546303752
735	0.079169111	0.225815921	0.445253506	0.743780182
736	-0.925248897	-0.650665891	0.497480893	0.687004994
737	0.051908076	0.500832441	0.448966307	0.513125943
738	0.291183966	1.510853817	0.57055623	0.164015193
739	2.303943801	2.185045719	0.626848637	0.77125813
740	-2.662281156	-3.46023736	0.787568248	0.52006493
741	-0.724650145	-0.452962303	0.602433689	0.699954651
742	0.696981508	0.4969729	0.508758895	0.724969935
743	0.945414722	0.52267998	0.401645776	0.507512505
744	-0.014169365	0.019622959	0.746143957	0.81853495
745	1.085310995	0.307228641	0.657164629	0.464550885
746	-0.093411145	0.387431955	0.649228612	0.617152011
747	1.14800089	1.656395137	0.590388969	0.558890275
748	1.397865507	1.36643439	0.701600039	0.81853495
749	0.092592573	-0.250095312	1.001701284	0.740430616
750	-0.405920272	-0.217525675	0.373068921	0.687273218
751	0.332622091	0.180458372	0.489631717	0.748484336
752	-0.641232775	-0.317998926	0.468238167	0.638238499
753	-1.500076741	-1.023313892	1.019263203	0.699528183
754	0.65423827	0.166476944	0.487850478	0.525077202
755	-1.244705617	-0.564591195	0.504944893	0.416421015
756	-0.999595642	-0.996931503	0.360515914	0.823360667
757	-0.191814621	-0.331054069	0.391258907	0.734473972
758	0.398767433	0.623667379	0.481498109	0.70111235
759	0.508872583	0.789491856	0.496632738	0.685602111
760	-0.453225991	-0.087931875	0.294347809	0.458101638
761	0.083982168	0.326881396	0.487892768	0.689278548
762	-0.072621817	0.313008212	0.496585541	0.605268913
763	0.309239325	0.681412822	0.335734852	0.507512505
764	-0.246051924	-0.441166704	1.272152946	0.780640535
765	0.144176245	-0.347709219	0.438448071	0.506688247
766	-0.058599026	0.477516409	0.944773848	0.674349118
767	0.146683176	0.077387389	0.320916235	0.759720757
768	-0.180726015	-0.548180406	0.315711719	0.464550885
769	0.042179959	-0.74644511	0.58548141	0.445937939
770	0.532501286	0.637799669	0.428905296	0.758322351
771	-1.638071346	-3.169857502	0.510851821	0.107494229
772	-0.476945536	-0.908802694	0.599729985	0.639038073
773	-0.169981519	-0.303426588	0.398232913	0.748484336
774	0.31974521	0.315928182	0.684874649	0.823360667
775	-0.307762593	0.10788251	0.371559038	0.492571283
776	-0.243726557	0.056930362	0.424543599	0.631976837
777	0.016462867	-0.054609149	0.295298428	0.758322351
778	0.162393632	-0.077015472	0.428639051	0.678323501
779	-1.104745543	-1.042802066	0.35178019	0.773043536
780	-0.147870812	-0.477517828	0.325778703	0.520584355
781	1.530064285	1.79233408	0.444691578	0.671488059
782	-0.459340808	-0.295551447	0.315558208	0.687273218
783	-0.535408883	-0.675936446	0.614352302	0.758322351
784	0.070466816	0.111426523	0.461912607	0.806558808
785	1.074096489	2.457074851	1.280561385	0.505163842
786	1.804532528	1.946934472	1.126982535	0.79384847
787	0.487198837	0.799582005	0.405554418	0.606828882
788	0.295968259	-0.206150687	0.641984638	0.614316898
789	0.377164102	0.950952128	0.818222165	0.636509349
790	1.941375423	1.599635651	0.788148072	0.703477889
791	1.169121924	2.260086822	0.43629619	0.152723077
792	0.098897664	0.449510408	0.344949207	0.509741474
793	1.54908091	1.841644426	0.809832482	0.730883134
794	1.781518078	1.718243867	0.809629138	0.806864118
795	-0.42046712	-0.381784529	0.42071649	0.803568464
796	0.99739578	0.786958302	1.113257926	0.771126044
797	0.164022976	0.304294951	0.279764425	0.687377896
798	0.131262868	0.127869432	0.399423949	0.823360667
799	-0.143322843	-0.038674741	0.385144708	0.758296832
800	-0.406862303	-0.580073426	0.380520632	0.699528183
801	-0.803053176	-0.865396083	0.319258255	0.771126044
802	-0.191156246	-0.269321742	0.267812946	0.751943507
803	-0.16105327	-0.24288307	0.307717668	0.758296832
804	-0.566830373	-0.668458566	0.270397184	0.724969935
805	-0.583883911	-1.020378649	0.263153778	0.28238883
806	-1.425595009	-1.869397293	0.530775734	0.568484332
807	-0.727566081	-0.238955816	0.312430943	0.311143041
808	-1.582956205	-1.561324439	1.778130705	0.823247379
809	-1.146414614	-1.050747716	0.387546062	0.758322351
810	0.750414682	0.474949319	0.446989793	0.662293517
811	1.028493843	1.276106572	0.505689104	0.699528183
812	0.050800504	-0.109760206	0.344890528	0.699528183
813	-1.053830075	-0.961389552	0.373344722	0.758322351
814	-1.928995144	-3.205779672	0.7321446	0.286856975
815	-1.8457003	-2.578408182	0.903072219	0.581665574
816	-2.015548706	-2.313643138	0.961141243	0.748484336
817	-0.603479773	-0.655638481	0.514209706	0.800387106
818	-1.836123413	-1.361169434	0.6569292	0.638238499
819	-1.101719844	-1.198452816	0.488406201	0.767392857
820	-0.968521977	-0.593490519	0.509392994	0.618686647
821	0.920604497	1.394538035	0.432498532	0.505163842
822	-0.234987304	-0.021070051	0.485787672	0.703477889
823	0.176840034	0.362566652	0.349669844	0.687004994
824	0.794147947	2.009230057	0.42075942	0.100920895
825	-0.473034182	-0.38062301	0.373370966	0.758322351
826	-0.544861664	-0.194024639	0.335075023	0.509741474
827	0.739259005	0.746810188	0.32992876	0.823247379
828	-0.530621695	-0.927483505	0.429607098	0.548535175
829	-1.393320382	-2.275175405	0.523105433	0.298351227
830	0.529745045	0.042696357	0.395617706	0.464550885
831	-0.025371935	-0.018314522	0.386112314	0.823247379
832	-0.030515497	-0.322503421	0.59085299	0.699528183
833	-1.796071661	-1.813993047	0.886337795	0.823247379
834	0.107719955	0.728540647	0.897105774	0.638238499
835	-0.076367301	-0.280567467	0.30376937	0.642676843
836	-0.22552039	-0.200571483	0.249365626	0.800387106
837	-0.227546408	-0.285411452	0.255472592	0.758752739
838	-1.459030366	-1.548597515	0.34536377	0.758296832
839	-0.4358807	0.04746919	0.481117854	0.5223166
840	0.167957027	0.363641849	0.472927497	0.70821565
841	0.264386966	0.86935241	0.401743906	0.34689214
842	0.266114551	0.777140998	0.498878246	0.509741474
843	-1.652209306	-1.132333259	0.595360027	0.553731087
844	-1.796241617	-2.429653704	0.548847471	0.470130148
845	-0.882306147	-0.798175871	0.381080908	0.760934213
846	-2.268185926	-2.930107991	0.754188657	0.549657547
847	-0.310335487	-0.61305067	0.564284711	0.686356506
848	-0.317429206	-0.734697441	0.414280105	0.509741474
849	-1.676096445	-2.459074895	0.797856471	0.514759413
850	1.009574855	0.987889608	0.430199483	0.817567952
851	-0.635953725	-0.380154814	0.728844055	0.736615376
852	-0.066292301	0.36527845	0.748770717	0.671488059
853	0.233960539	0.34770732	0.390105612	0.751943507
854	-0.225903891	0.106101999	0.327105583	0.52006493
855	-0.778892398	-0.674773246	0.345841543	0.750208432
856	0.675519218	0.466387242	0.455154926	0.699528183
857	-1.91584878	-2.962046345	0.504654764	0.169228006
858	-0.454543015	-0.355144327	0.469606255	0.760792986
859	-0.445549894	-0.419250642	0.366893381	0.809230022
860	0.944884506	0.362708944	0.695485432	0.58846035
861	-2.583674574	-3.165091833	1.141751299	0.687273218
862	-0.112759371	-0.294991423	0.387581238	0.699528183
863	-1.001100195	-0.601005626	0.598860972	0.65533532
864	-0.689084774	-0.736172998	0.396025124	0.795671849
865	-0.123475339	-0.331065067	0.406316039	0.687273218
866	-0.663790411	-0.336928319	0.421543975	0.605879414
867	-1.041781527	-0.39747866	0.491246756	0.458101638
868	0.654800809	0.61953821	0.522746499	0.812512292
869	-0.327992564	0.119391198	0.433300862	0.509741474
870	-0.023003471	-0.467424517	1.017021033	0.703477889
871	-0.739290643	-0.891957293	0.467927124	0.747318576
872	-0.440095148	-1.230658615	0.58800645	0.446741129
873	-0.937370469	-1.090777421	0.559677153	0.758296832
874	0.907330263	1.34318707	0.467547185	0.545743748
875	-2.915072155	-3.693451007	0.523649926	0.354072763
876	-2.385055709	-2.270831664	0.56214993	0.765013245
877	-0.156745332	-0.16142102	0.558695816	0.823360667
878	-1.864513564	-2.980580473	0.512941179	0.173629419
879	-0.948558509	-1.2024429	0.523893544	0.696969188
880	-1.75117619	-1.929380477	0.660108312	0.758296832
881	-0.827237326	-1.234298185	0.476073242	0.561186344
882	-0.823772794	-0.653681924	0.363567534	0.699528183
883	-1.8528831	-2.020258403	0.524346525	0.749987246
884	2.016932689	1.999898513	0.944107375	0.823247379
885	-0.102285884	-0.009522844	0.300042446	0.748778066
886	1.271275175	1.358573258	0.509500093	0.774201984
887	1.301587272	1.476516445	0.468383814	0.725384454
888	0.339843498	0.747780257	0.621088516	0.657933933
889	-0.715840554	-0.998583963	0.396221308	0.630516146
890	0.311306524	-0.891804244	0.592219271	0.173629419
891	-0.016574266	0.078137136	0.401804744	0.758752739
892	0.2011574	-0.120123551	1.047347829	0.748945367
893	-0.167928591	0.475237119	0.637264616	0.509741474
894	-1.756128108	-1.787421445	0.644113799	0.817567952
895	0.922435492	1.533538199	0.415574471	0.389683174
896	0.625431979	0.389492174	0.511996627	0.699528183
897	-0.462873626	-0.250039662	0.74839428	0.75390003
898	-2.792199022	-3.453386116	1.26155332	0.688549339
899	-3.60960927	-3.786124945	0.78487862	0.758752739
900	-0.682251704	0.028473568	0.300456577	0.152723077
901	-0.903319174	-0.8156358	0.496344309	0.773043536
902	-0.837196112	-1.282114983	0.391562127	0.483295438
903	-1.874609113	-1.879270574	0.411973461	0.823247379
904	-2.001689696	-1.670459879	0.707482235	0.70111235
905	-1.287566292	-0.105582744	0.787071409	0.34689214
906	0.251375353	0.734581423	0.442031077	0.509741474
907	-0.569840904	-0.410251441	0.600053877	0.758296832
908	-0.365229264	-0.404692172	0.461871869	0.806423851
909	-0.277838844	-0.128869276	0.426172765	0.740804579
910	-0.528030288	-0.51303136	0.561726764	0.823247379
911	0.097812346	0.281298611	0.394437468	0.699528183
912	-1.015483022	-0.962313306	0.528090604	0.802114756
913	-0.433264621	-0.136016642	0.321501451	0.529744775
914	-0.498563704	-0.054990799	0.304509727	0.365031375
915	-0.036804746	-0.135996532	0.484092842	0.767915134
916	-0.176510604	-0.190236608	0.316673687	0.81853495
917	-0.290224723	-0.14739949	0.312636593	0.699528183
918	1.138572276	0.424095502	0.358648314	0.178763239
919	-0.218225388	-0.297252424	0.312913297	0.758296832
920	-0.198157431	-0.285279444	0.482872425	0.77125813
921	-0.183161061	-0.336845912	0.34158133	0.700068796
922	-0.21789131	-0.092865345	0.333274937	0.732828891
923	-0.957949805	-0.774273386	0.348578594	0.687004994
924	0.123542327	-0.164836119	0.388156067	0.614760453
925	-0.766756047	-1.227673805	0.475773183	0.530704475
926	-1.574477005	-0.782942489	0.535874226	0.35898326
927	-0.28595878	-0.50352597	0.280797707	0.605879414
928	0.087324935	0.399852319	0.561010776	0.687004994
929	0.682206902	0.576688799	0.464700169	0.759720757
930	-0.168080851	-0.138844783	0.383586529	0.807923832
931	-0.060208388	0.072158581	0.447547672	0.75390003
932	-0.583544883	-0.433615272	0.467861018	0.748484336
933	-1.104725629	-0.877968216	0.511683498	0.703477889
934	-1.399830401	-1.986896713	0.525427728	0.492571283
935	0.052669244	0.245717978	0.32104928	0.671488059
936	0.375403619	-0.181894276	0.800287522	0.647911519
937	-0.093029392	-0.201063231	0.607142278	0.774186325
938	0.287356526	0.345710053	0.572718332	0.801429452
939	-0.726883513	-0.479477438	0.457365397	0.685602111
940	-0.427077452	-0.538486585	0.348812884	0.748484336
941	-0.192474306	-0.305326536	0.44991181	0.758322351
942	0.352553708	0.102007287	0.339909179	0.618286177
943	-2.881504965	-3.63777109	0.764591823	0.513464827
944	0.567873139	0.591069897	0.695980664	0.822484038
945	0.066099334	0.88481954	0.778171651	0.513125943
946	1.573641107	2.583798528	0.744565035	0.408971724
947	2.253569007	2.223651012	0.564421235	0.817567952
948	-0.033468834	0.048112547	0.350216821	0.759720757
949	-2.002299857	-2.589561105	0.614158855	0.539325586
950	0.414043872	0.417232847	0.591147779	0.823360667
951	0.705976942	0.953162402	0.455271556	0.685602111
952	0.267559391	-0.010342702	0.541888068	0.687273218
953	0.961977744	0.53838133	0.522452905	0.581665574
954	-1.224913025	-0.451417261	0.999454787	0.618286177
955	-1.080648851	-1.198998821	0.881420653	0.793121409
956	-0.334608883	-0.380610002	0.57325133	0.806864118
957	-1.473459303	-2.766494592	1.107160075	0.464550885
958	-0.414908984	-0.477734199	0.638927502	0.800638315
959	-0.167633768	-0.31625357	0.471290324	0.748484336
960	-0.363547844	-0.404388402	0.477280568	0.806864118
961	-0.810102528	-1.157618869	0.494462851	0.642676843
962	0.784792876	1.071227777	0.744210939	0.726808774
963	-0.289506662	0.417510306	1.037714373	0.654176403
964	-0.825638765	-0.168232254	0.555023706	0.488799831
965	-0.015591458	0.084485181	0.326518239	0.748945367
966	-0.347313273	-0.137814841	0.300953136	0.647911519
967	-0.806966257	-0.965189576	0.39379704	0.714351458
968	0.496192467	0.661936214	0.300362253	0.679672878
969	1.036070442	0.954423135	0.369917765	0.759720757
970	0.92373662	0.667386308	0.361354406	0.630778049
971	0.85951128	0.778655017	0.604078533	0.791407468
972	0.170663056	-0.088105071	0.967984741	0.758296832
973	1.387289882	1.40739588	0.333351507	0.814741233
974	1.106363845	1.249645621	0.41336363	0.739669348
975	-0.570146601	0.017519553	0.463672496	0.448413857
976	-0.460282344	-0.461860893	0.34037633	0.823360667
977	-0.177445656	-0.241310392	0.31379155	0.765013245
978	0.248509925	0.257984252	0.339963031	0.823247379
979	0.173059943	-0.185566853	0.381869871	0.525077202
980	0.667485964	0.56063049	0.335679924	0.748484336
981	0.982977313	1.595133877	0.655137099	0.545743748
982	-0.266215153	-0.248205857	0.455512496	0.821163952
983	1.074909836	0.63360788	0.73485565	0.671281619
984	0.015176798	0.591755539	0.593909502	0.529744775
985	-0.086811844	0.360834837	0.582099362	0.606828882
986	-0.206785558	-0.248434418	0.47989116	0.806864118
987	-0.276176649	-0.503235008	0.526029098	0.703477889
988	-0.766525018	-0.401142754	0.332321073	0.509741474
989	-1.767365956	-1.914753516	0.348045887	0.703477889
990	-0.343339783	-0.001419654	0.387010211	0.546303752
991	1.611585796	1.773123133	0.701193392	0.759720757
992	-2.118001747	-2.968375492	0.466339128	0.26308542
993	0.894534624	0.681455538	0.349586193	0.66858433
994	-0.466703112	-0.541068143	0.322539356	0.759720757
995	0.484274945	0.505460168	0.413385657	0.817567952
996	-0.2360478	-0.232823029	0.404373642	0.823360667
997	-1.345395863	-1.295388232	0.404866477	0.794408385
998	0.308345836	-0.277086034	0.360403345	0.286856975
999	-0.362034456	-0.234823111	0.425230902	0.753106505
1000	0.18645962	-0.267913181	0.374112644	0.464008258
1001	0.503582659	0.245076358	0.717061634	0.731019384
1002	-0.98041031	-1.182207336	0.963581258	0.762145683
1003	0.062681237	-0.724501645	0.447377223	0.281852878
1004	-0.608077127	-0.755167226	0.32515822	0.699837211
1005	-0.662319517	-0.827461064	0.329093608	0.687273218
1006	-1.38829186	-2.069243769	0.465199317	0.365031375
1007	-0.62146759	-0.797270288	0.279791615	0.657933933
1008	-1.358368456	-1.238414104	0.500617565	0.758322351
1009	-0.260809129	-0.42508659	0.296380981	0.679653675
1010	0.53788473	0.277630308	0.348912095	0.630516146
1011	-0.92166059	-1.533030379	0.513583527	0.48350907
1012	-0.585866401	-0.421606596	1.207678281	0.791889973
1013	1.362614862	0.833839202	1.099647257	0.699528183
1014	-0.447645509	-0.548480069	0.983287646	0.800387106
1015	0.049477986	0.022085103	0.801872522	0.822484038
1016	-0.163414305	-0.361796789	0.908764253	0.759720757
1017	-0.280829893	-0.345439164	0.338214616	0.771024173
1018	-0.229831261	-0.581074869	0.699439788	0.687273218
1019	-0.197669545	-0.334933054	0.45400073	0.750208432
1020	-0.366088381	0.34536014	0.462094557	0.322856996
1021	-0.042593288	-0.233727439	0.373839143	0.687273218
1022	-0.074033192	-0.188063404	0.382026855	0.750208432
1023	0.648529285	1.004553755	0.325866703	0.505163842
1024	0.687582141	-0.576957059	0.619524484	0.19520486
1025	-0.042277211	0.118803242	1.012852943	0.777847617
1026	-0.281915738	-0.213588643	0.362762801	0.771126044
1027	0.683231437	1.200374434	0.430050319	0.464550885
1028	-0.107056737	-0.113434295	0.64502775	0.823360667
1029	-1.846160817	-2.027792891	0.715535888	0.758296832
1030	0.031953487	0.980673086	0.620105268	0.366705997
1031	-0.02043713	0.573965566	0.56215692	0.509741474
1032	0.780835095	0.731689721	0.358808993	0.789579136
1033	0.802085644	0.655455053	0.320259813	0.699528183
1034	-0.277979049	-0.549153251	0.539613758	0.687273218
1035	0.126251581	-0.395188364	0.668903858	0.60283976
1036	-0.307146303	-0.112826562	0.398291146	0.695160831
1037	-2.518811989	-2.738798638	0.80822449	0.758160895
1038	-2.523249101	-2.02924757	1.239401074	0.723080165
1039	-2.157832012	-2.123266419	1.148234022	0.82302295
1040	-0.329704389	-0.133742444	0.513925781	0.722825233
1041	0.925014031	1.28722142	0.556233617	0.659828385
1042	0.996036184	1.097429286	0.376146022	0.758160895
1043	-0.022306695	0.188685957	0.321980716	0.649637977
1044	-4.511527742	-5.313527619	2.79918578	0.752792013
1045	-0.211372387	-0.167738291	0.308942537	0.786475959
1046	0.705932627	-0.160108195	0.422282038	0.173218104
1047	0.701364076	0.843291417	0.703995765	0.766287009
1048	-0.773099473	-0.252669067	0.673030395	0.605879414
1049	-0.046125747	0.883176232	0.437650774	0.168307349
1050	0.133405918	-0.214871693	0.716521875	0.699528183
1051	-1.347068524	-2.458731746	0.566282662	0.228462624
1052	-1.218909454	-1.188322341	0.94496032	0.82302295
1053	-1.142508936	-1.209166696	0.380213502	0.773043536
1054	1.043588245	1.263753618	0.848950187	0.758296832
1055	1.180474293	1.343525608	0.391331494	0.707570227
1056	1.274871421	0.50133652	0.957777929	0.582929422
1057	0.115462917	0.353073414	0.436955556	0.687273218
1058	0.789280456	0.446167444	0.682453635	0.687273218
1059	0.509982634	0.645784731	0.681665703	0.767146831
1060	-2.616577029	-5.434905529	0.616381888	0.006810069	1060_CDK1_T14	2.8183285
1061	1.44806366	1.885089169	1.880743677	0.758322351
1062	-1.513475776	-2.811445674	0.764572397	0.265638997
1063	1.346580017	1.52835093	1.291199011	0.78648231
1064	-1.871151328	-1.984783173	0.596904496	0.771126044
1065	-0.09934025	0.940326264	0.45421196	0.152723077
1066	0.097825811	-0.167939635	0.33987706	0.614316898
1067	-2.616577029	-5.434905529	0.616381888	0.006810069	1067_CDK2_TNaN	2.8183285
1068	-0.4870628	-0.702333686	0.461623108	0.701215167
1069	0.165298218	0.979966429	0.70034267	0.464550885
1070	0.008608083	1.145533303	0.412224895	0.10863175
1071	-0.294182103	-0.60183907	0.369366348	0.572124976
1072	1.592641759	1.613515735	0.422472181	0.817567952
1073	0.229734232	0.097526885	0.284538877	0.699528183
1074	-0.118861151	-0.743380046	0.769009954	0.605879414
1075	-0.665892124	-1.512370014	0.704090975	0.481737609
1076	1.582523227	2.585503916	0.844132375	0.464550885
1077	-0.028008383	0.009755138	0.498715972	0.808772954
1078	-0.196349564	-0.124062913	0.28936176	0.758322351
1079	-0.011666536	0.697258139	0.688167647	0.514759413
1080	0.496764332	0.632959622	0.286784062	0.699832864
1081	0.077717324	0.267992186	0.361760656	0.687004994
1082	-0.047736436	0.112307818	0.350678358	0.699528183
1083	1.575892711	1.287804216	0.475850668	0.668962635
1084	0.077245706	0.159675912	0.450454169	0.773043536
1085	1.074766528	1.434507346	0.34305062	0.513125943
1086	0.094498783	0.378925739	0.448373719	0.668962635
1087	0.002262566	0.270054856	0.326073907	0.60283976
1088	3.210476541	3.906266975	0.656576141	0.509741474
1089	-0.067965101	-0.111538223	0.367997129	0.795864068
1090	-1.148909295	-1.509748295	0.593663656	0.66858433
1091	-0.235517989	-0.201496322	0.423420106	0.807657202
1092	0.407055873	-0.034308113	0.480196558	0.533708038
1093	-0.677053428	-0.22240443	1.083101154	0.705553908
1094	-1.271866965	-1.049782778	0.416701169	0.687004994
1095	-0.503216605	-0.020536965	0.741902985	0.659828385
1096	-0.02529905	0.039627369	0.263663912	0.758322351
1097	-0.533389801	-0.553083305	0.288647768	0.812203464
1098	-0.189257128	0.04417434	0.324478768	0.629146879
1099	-0.5001748	-0.402087537	0.989266511	0.800638315
1100	0.254343796	1.188954973	0.716490263	0.458101638
1101	-0.286202633	-0.386901558	0.30423107	0.741943277
1102	-0.021017427	-0.225571411	0.279024955	0.620670701
1103	-0.618866634	-0.672466442	0.47072068	0.797658716
1104	-0.151071565	-0.721095738	0.749345312	0.607437005
1105	-0.373040354	-0.561541172	0.480084362	0.717859533
1106	-2.237295198	-3.452117403	0.834686493	0.365031375
1107	-0.460978954	-0.599795635	0.432851948	0.748484336
1108	0.399588987	0.932647864	1.071313829	0.689278548
1109	-2.237295198	-3.452117403	0.834686493	0.365031375
1110	-0.124036223	-0.249638706	0.316995938	0.715251608
1111	-0.007080224	0.142173963	0.408468172	0.727632587
1112	0.356513204	0.259817141	0.435023884	0.759720757
1113	-0.20428083	0.178412285	0.573880089	0.646466267
1114	-1.113210768	-0.460821112	0.682051228	0.5223166
1115	-0.273925567	-0.032485818	0.657458668	0.726808774
1116	-0.465248029	-0.613788173	0.57521226	0.758296832
1117	-1.297245381	-0.546126495	0.771418282	0.517577917
1118	-1.297245381	-0.546126495	0.771418282	0.517577917
1119	-3.299566126	-4.285216451	0.646276783	0.330829541
1120	-3.299566126	-4.285216451	0.646276783	0.330829541
1121	-2.929020381	-2.416751246	0.526148628	0.517577917
1122	-2.870675683	-2.663231373	0.593601209	0.740804579
1123	-0.24613978	-0.480437647	0.878891517	0.758296832
1124	0.444961387	1.362641847	1.075324839	0.580877182
1125	0.444961387	1.362641847	1.075324839	0.580877182
1126	-0.615962189	-0.078780454	0.438032562	0.464550885
1127	-0.615962189	-0.078780454	0.438032562	0.464550885
1128	0.577876294	0.891737382	1.468534876	0.760289389
1129	0.577876294	0.891737382	1.468534876	0.760289389
1130	-0.70813055	-1.548614422	0.650942727	0.436224419
1131	-1.574273753	-1.77087148	0.617513574	0.748484336
1132	-1.574273753	-1.77087148	0.617513574	0.748484336
1133	-1.869857343	-1.211887305	0.88457689	0.614316898
1134	-1.852809047	-1.166119869	0.87902892	0.60283976
1135	-0.016867745	0.062557494	1.064297482	0.808472461
1136	0.770068216	0.651486358	0.530075072	0.75946992
1137	0.88896687	0.752098203	0.433314437	0.748484336
1138	-0.127793361	0.029466197	0.648440778	0.758322351
1139	0.863400339	0.526602307	0.946169041	0.740804579
1140	1.008787157	1.950822254	0.793637609	0.464550885
1141	1.008787157	2.148047435	0.762848612	0.378680681
1142	-0.247002172	0.603105971	0.746519856	0.505163842
1143	-0.237970728	0.636458513	0.756915226	0.505163842
1144	-0.659460298	0.645105582	0.88479112	0.388361686
1145	-0.906156641	-0.377847657	0.693112954	0.607437005
1146	-0.850154668	-0.40683658	0.701055231	0.65533532
1147	0.914184222	1.509236535	0.438928021	0.408971724
1148	0.914184222	1.585283637	0.456639318	0.363152666
1149	-0.542248499	-0.450805042	0.614847766	0.782029007
1150	-0.541119432	-0.438699948	0.608038646	0.774186325
1151	-0.423230637	-0.210988059	0.311675976	0.641138022
1152	-0.423230637	-0.210988059	0.311675976	0.641138022
1153	-0.46035842	-0.582289519	0.382663878	0.748484336
1154	-0.38929737	-0.582289519	0.399322529	0.698264721
1155	-1.562474585	-0.518440938	1.428007962	0.637898371
1156	-1.562474585	-0.518440938	1.428007962	0.637898371
1157	0.528456408	0.623649359	0.777066864	0.794408385
1158	-0.261943088	-0.261912422	0.349624382	0.82485322
1159	-0.571426392	-0.04896322	0.321458484	0.286856975
1160	-0.571426392	-0.04896322	0.321458484	0.286856975
1161	-0.633617121	-1.222714043	0.78549426	0.630512515
1162	-0.74937306	-0.434836433	0.52475815	0.671281619
1163	-0.746050709	-0.423113639	0.522158505	0.661348887
1164	-0.192860763	0.250234188	0.389403436	0.505163842
1165	-0.192860763	0.250234188	0.389403436	0.505163842
1166	-1.631446004	-1.313737025	0.683206049	0.699528183
1167	0.176615393	0.114734258	0.523634922	0.795864068
1168	0.218637085	0.082988566	0.528202596	0.758296832
1169	-0.539786705	-0.235765979	0.538259924	0.676361068
1170	-0.512270894	-0.251375472	0.531404804	0.693014308
1171	-2.334839964	-2.188464622	0.661485864	0.759720757
1172	-2.334839964	-2.188464622	0.661485864	0.759720757
1173	-1.449966597	-1.507717669	0.393892668	0.782029007
1174	-1.449966597	-1.507717669	0.393892668	0.782029007
1175	0.138024119	-0.011065834	0.569411384	0.758296832
1176	0.138024119	-0.028895392	0.571635022	0.751943507
1177	-1.455221033	-1.540887157	0.376554909	0.758623684
1178	1.523736282	1.190356096	0.75173801	0.701855366
1179	0.627546987	0.08939147	0.481565092	0.492571283
1180	0.6736766	0.423223396	0.53102507	0.699528183
1181	-0.621772124	-0.795978747	0.590061207	0.754177252
1182	-0.664339758	-1.010464362	0.711051452	0.696280564
1183	-0.383673474	-0.525518738	0.352734199	0.714351458
1184	-0.383673474	-0.525518738	0.352734199	0.714351458
1185	0.303734266	0.321122234	0.49530971	0.822484038
1186	0.324015652	0.317670956	0.490579454	0.823247379
1187	0.020726597	-0.084930668	0.414757129	0.758296832
1188	0.157850621	-0.084930668	0.351150884	0.638238499
1189	-0.103577346	-0.214025308	0.300515544	0.726808774
1190	-0.103577346	-0.214025308	0.300515544	0.726808774
1191	-0.544960588	0.004045443	0.535645985	0.509741474
1192	-0.544960588	0.004045443	0.535645985	0.509741474
1193	-0.588047446	-0.631018378	0.471007173	0.803568464
1194	-0.588047446	-0.631018378	0.471007173	0.803568464
1195	1.547375345	1.198227741	0.621449729	0.676562822
1196	1.272458911	0.678646927	0.662734985	0.561186344
1197	1.272458911	0.678646927	0.662734985	0.561186344
1198	-1.960341501	-1.922921479	0.487665332	0.807657202
1199	-2.119954539	-2.064337711	0.439439259	0.79384847
1200	0.394476295	0.282541853	0.77702358	0.783760986
1201	0.217113216	0.821321577	0.643594394	0.525077202
1202	-0.105097761	0.687164977	0.725074523	0.505163842
1203	-2.219432366	-1.36997168	0.820420558	0.509741474
1204	-2.101582444	-1.36997168	0.778947994	0.525077202
1205	-0.221557423	-0.146572561	0.455838816	0.774186325
1206	-0.244676532	-0.54008878	0.489050482	0.668962635
1207	0.102948493	0.053082186	0.395551549	0.794806552
1208	0.101042136	0.053082186	0.3950078	0.796152953
1209	0.037133601	0.108540934	0.315777757	0.758752739
1210	0.026791593	0.082869452	0.314350521	0.772063545
1211	0.046871217	0.181300296	0.30465168	0.703477889
1212	0.023466665	0.12501906	0.313921842	0.748484336
1213	0.123734015	-0.429575811	0.280967555	0.184710822
1214	0.184916028	-0.430819219	0.26489947	0.152723077
1215	0.502420536	0.354131395	0.424767099	0.737405313
1216	-0.128469408	-0.704834307	0.889275954	0.65533532
1217	0.913704681	1.28139622	0.485384	0.607437005
1218	-1.483508694	-1.859870792	0.418366618	0.540394506
1219	-1.483508694	-1.859870792	0.418366618	0.540394506
1220	0.631817662	0.37833033	0.858104533	0.750896695
1221	0.662399637	0.356100897	0.859607721	0.734276858
1222	1.629543757	1.300728421	0.394969925	0.572124976
1223	1.63178587	1.300728421	0.393638042	0.566698086
1224	-0.086324603	-0.078468415	0.559310994	0.823247379
1225	-0.086324603	-0.078468415	0.559310994	0.823247379
1226	-1.877249771	-1.010246187	1.523199123	0.685602111
1227	-1.207564551	-0.804058914	1.156411248	0.737405313
1228	-1.221534813	-0.775212082	1.163719696	0.722825233
1229	-2.360026514	-1.63900586	1.418597523	0.687273218
1230	-2.360026514	-1.636850357	1.418590542	0.687273218
1231	2.988240909	3.350760078	1.201821249	0.752696082
1232	2.842064023	3.196897173	1.196137559	0.75390003
1233	1.357678938	1.155686021	0.397720101	0.696969188
1234	1.399735189	1.145039582	0.406699163	0.671281619
1235	-2.667329526	-2.655838072	0.677280539	0.823247379
1236	-2.172881555	-3.046963692	0.621970821	0.380561931
1237	-2.172881555	-3.046963692	0.621970821	0.380561931
1238	-1.099980581	-1.107934916	0.445853332	0.823247379
1239	0.17245295	-0.581098258	0.983211826	0.606828882
1240	0.17245295	-0.581098258	0.983211826	0.606828882
1241	-0.414139584	-0.619731034	0.394027586	0.687273218
1242	-0.414139584	-0.619731034	0.394027586	0.687273218
1243	1.347077453	1.435294439	0.872123849	0.800387106
1244	1.347077453	1.425500393	0.874339618	0.804773173
1245	-0.203547352	0.093738642	0.309503157	0.520954585
1246	-0.167331089	0.160699331	0.326345668	0.509741474
1247	-0.483049065	-1.538609933	1.072178365	0.513464827
1248	-0.380261868	0.064810585	0.801365626	0.679653675
1249	-0.248815233	0.301042795	0.771859709	0.630516146
1250	-0.888090278	-1.494699418	0.826528105	0.637552735
1251	-1.198343579	-2.119738092	0.999531017	0.530704475
1252	-1.276115922	-2.417875936	1.607340862	0.630516146
1253	0.503635144	0.721366218	0.579411811	0.732412165
1254	0.434550547	0.68017073	0.610442769	0.722825233
1255	-1.682641029	-0.732248416	0.785482141	0.464550885
1256	-1.682641029	-0.732248416	0.785482141	0.464550885
1257	-1.228485835	-1.16222887	1.079638184	0.815971424
1258	0.066418162	-0.247868717	0.478885987	0.649637977
1259	0.066418162	-0.247868717	0.478885987	0.649637977
1260	-0.2761776	-1.072735202	1.747289141	0.703477889
1261	1.285174382	0.615892291	0.512618136	0.428615525
1262	1.285174382	0.615892291	0.512618136	0.428615525
1263	-0.20087803	0.697112863	0.375967088	0.152723077
1264	-0.195803797	0.722814694	0.37492811	0.152723077
1265	-0.094468272	-0.595478689	1.167359084	0.703477889
1266	-1.573340667	-1.49069606	1.141557704	0.808772954
1267	-0.021249902	-1.350386587	1.387196547	0.539325586
1268	-2.698366499	-3.105078449	0.946348728	0.703477889
1269	-2.698366499	-3.105078449	0.946348728	0.703477889
1270	0.339979471	-0.495974657	0.755254311	0.501239991
1271	0.386189973	0.222709809	0.515288111	0.748484336
1272	0.280649894	0.540104397	0.537358866	0.698264721
1273	-4.17697773	-4.78588303	0.650003778	0.525077202
1274	-0.793737984	-0.809964051	0.386268014	0.819003116
1275	-0.690387511	-0.756524543	0.330634659	0.766832532
1276	0.679868027	0.248288723	0.621235485	0.638238499
1277	-2.166385829	-2.89985168	0.721342744	0.509741474
1278	-0.664107853	-0.934215496	0.380216291	0.630516146
1279	-0.679553342	-0.934215496	0.377609305	0.642676843
1280	-0.168830416	-0.302035329	0.261194625	0.687273218
1281	-0.168830416	-0.302035329	0.261194625	0.687273218
1282	-0.404500234	-0.680244219	0.777924778	0.740804579
1283	-0.524210012	-0.859187797	0.534307562	0.657933933
1284	-3.33106389	-4.294551515	0.497782114	0.230296214
1285	-3.33106389	-4.294551515	0.497782114	0.230296214
1286	0.625725842	0.52752192	0.353645465	0.758296832
1287	0.201450832	-0.045231511	0.852813873	0.751943507
1288	0.145093378	0.138979979	0.814800266	0.823360667
1289	-4.557716513	-3.527791778	1.039001322	0.513464827
1290	-4.551790667	-3.739371816	0.927441579	0.550515829
1291	0.12680594	-0.408094542	0.499388864	0.505163842
1292	0.12680594	-0.408094542	0.499388864	0.505163842
1293	-0.026879898	-0.168124087	0.371325306	0.723080165
1294	2.297907805	1.595790958	0.830728239	0.583647618
1295	2.297907805	1.595790958	0.830728239	0.583647618
1296	-0.53290529	-0.41551638	0.454962372	0.758296832
1297	-0.53290529	-0.41551638	0.454962372	0.758296832
1298	-0.911334932	-1.227520347	0.445280701	0.630516146
1299	-1.078702904	-0.919436365	0.621870576	0.758296832
1300	-0.140649706	0.01184817	0.380269607	0.714351458
1301	0.22962109	-0.042249891	0.415374658	0.658494929
1302	-0.443891931	-0.188395207	0.439971195	0.671488059
1303	-0.443891931	-0.140826321	0.437055924	0.638238499
1304	-1.962176323	-1.370811462	0.545542324	0.505163842
1305	-1.958159399	-1.366794408	0.537964744	0.505163842
1306	-1.530481696	-0.660045669	0.583411593	0.353381029
1307	-1.351368213	-0.660045669	0.56693298	0.460414836
1308	-1.355264399	-0.768502285	0.659363541	0.545743748
1309	-1.355264399	-0.768502285	0.659363541	0.545743748
1310	0.190893143	0.613865991	0.64177766	0.648654549
1311	1.18036406	0.996953135	0.778999802	0.758322351
1312	1.581280613	1.421417425	0.798973206	0.766832532
1313	1.169146538	1.214513808	0.715051321	0.812798901
1314	1.075007534	1.478023958	0.860974735	0.70111235
1315	1.186454535	1.185945615	0.727999962	0.824811979
1316	0.190893143	0.613865991	0.64177766	0.648654549
1317	0.184049278	0.637139857	0.62386847	0.626123492
1318	0.210446	0.634229526	0.412071065	0.509741474
1319	0.094874082	0.500595757	0.424924563	0.522993204
1320	3.049982929	3.462458094	0.643030916	0.65533532
1321	0.925008965	-0.260553015	0.789968228	0.34689214
1322	0.966216052	-0.317593032	0.750437289	0.26308542
1323	0.613932818	1.592950041	1.147345459	0.561186344
1324	0.692963785	1.724503487	1.065280769	0.518906934
1325	-0.79839459	-0.882848307	0.430859691	0.767915134
1326	-0.79839459	-0.882848307	0.430859691	0.767915134
1327	1.764408589	2.032863458	0.671151041	0.714351458
1328	-0.513615751	-0.857829531	0.432856066	0.590875739
1329	0.436155718	1.012770231	0.569372202	0.509741474
1330	0.83479037	1.418162562	0.72954962	0.607437005
1331	0.846282303	1.528880084	0.633247058	0.509741474
1332	0.035676469	0.078823353	0.512477244	0.806558808
1333	0.035676469	0.078823353	0.512477244	0.806558808
1334	1.800227565	3.099476862	1.107146318	0.493444367
1335	1.186515969	2.543910583	0.851333115	0.298351227
1336	1.247526914	2.017752339	1.244284427	0.661120171
1337	-1.35022434	-1.024821401	0.439466983	0.617152011
1338	-1.548079109	-1.053902845	0.436603494	0.483295438
1339	-0.32198718	0.537181278	0.382838082	0.152723077
1340	-0.32198718	0.545425812	0.384242658	0.152723077
1341	1.218843424	1.194592957	0.704880859	0.822484038
1342	1.15986768	0.951766579	0.548436135	0.730883134
1343	0.478105634	-0.574739623	0.802228694	0.458101638
1344	-0.005329231	0.11485901	0.354813126	0.740804579
1345	0.002855673	0.11485901	0.355385809	0.748484336
1346	0.453866151	0.0364344	0.758053926	0.687004994
1347	-0.941205013	-1.167668333	0.395144552	0.671488059
1348	-0.072534068	0.044518803	0.427695546	0.758160895
1349	-0.072534068	0.044518803	0.427695546	0.758160895
1350	0.079067235	0.177987573	0.419150305	0.758322351
1351	0.079067235	0.177987573	0.419150305	0.758322351
1352	-0.314658578	-0.098697405	0.457952896	0.700068796
1353	-0.314658578	-0.098697405	0.457952896	0.700068796
1354	-0.535390324	-0.069749881	0.472473052	0.525077202
1355	-0.275708388	-0.476090488	0.378096756	0.687004994
1356	-0.275708388	-0.476090488	0.378096756	0.687004994
1357	1.157602626	1.252017963	0.547587198	0.774186325
1358	1.108463693	0.959836215	0.71946532	0.762603363
1359	-1.23479743	-1.164406985	0.291888748	0.758322351
1360	-1.23479743	-1.164406985	0.291888748	0.758322351
1361	-1.360984075	-1.338115593	0.377158524	0.814702019
1362	2.456617999	2.310267111	0.73265285	0.766832532
1363	2.456617999	2.310267111	0.73265285	0.766832532
1364	0.786948824	0.572041765	0.283609123	0.607437005
1365	0.756878424	0.578248149	0.297806997	0.671488059
1366	0.665611571	1.129090051	0.812582639	0.671488059
1367	0.665611571	1.129090051	0.812582639	0.671488059
1368	1.029670396	1.355153346	0.506735899	0.665927893
1369	-0.180030421	0.408494168	0.821944755	0.630026545
1370	0.033786151	0.28350336	0.821997264	0.750190807
1371	-0.900950015	-1.430505554	0.782953796	0.642676843
1372	-0.941005504	-1.433992863	0.789497545	0.658494929
1373	-0.117214307	-0.125812837	0.638938723	0.823247379
1374	0.262431639	-0.999852685	0.627326165	0.174606335
1375	0.284569004	-1.048840332	0.66222986	0.174606335
1376	0.913249683	0.576346818	0.551481351	0.671488059
1377	0.375464064	0.354949251	0.347550668	0.815879321
1378	0.512283237	0.082900213	0.393521627	0.509741474
1379	0.509398907	-0.086723468	0.482268817	0.458101638
1380	-0.822723186	-0.815764194	0.40765371	0.823247379
1381	-0.822723186	-0.816859196	0.399969915	0.823247379
1382	1.912140036	2.07736973	0.318584279	0.687273218
1383	1.983495832	2.141868234	0.423794367	0.725384454
1384	0.568443131	0.430007547	0.367122657	0.724969935
1385	0.609522676	0.38342524	0.342301783	0.648654549
1386	0.687616414	0.527714709	0.296572783	0.685602111
1387	0.687616414	0.527714709	0.296572783	0.685602111
1388	1.254491098	-0.044787903	0.667758086	0.230296214
1389	1.197962113	-0.044787903	0.791933147	0.354072763
1390	0.508214456	0.073991832	0.848534336	0.687273218
1391	0.508214456	0.073991832	0.848534336	0.687273218
1392	-0.482614905	-0.3883514	0.640346113	0.78648231
1393	-0.05014303	-0.321052265	0.749470248	0.73967626
1394	-0.05014303	-0.321052265	0.749470248	0.73967626
1395	-0.214969336	-0.414179566	0.388349941	0.687273218
1396	-0.214969336	-0.414179566	0.388349941	0.687273218
1397	-0.179725953	-0.288174572	0.32269248	0.740804579
1398	-0.179725953	-0.288174572	0.32269248	0.740804579
1399	0.398958434	0.261920827	0.408034776	0.748484336
1400	0.398958434	0.261920827	0.408034776	0.748484336
1401	-0.242232458	-0.097904734	0.566394598	0.758296832
1402	-0.242232458	-0.097904734	0.566394598	0.758296832
1403	-1.317806745	-0.744390841	0.542459375	0.506688247
1404	-1.387658536	-0.834845836	0.560936842	0.513464827
1405	-1.265782511	-1.268434738	0.681459037	0.823675244
1406	-0.226561459	-0.076157426	0.274990766	0.683099704
1407	-0.218042644	-0.082442073	0.273863773	0.690028373
1408	-0.018436617	-0.087571149	0.294521323	0.758322351
1409	0.030200382	-0.070127016	0.298297531	0.740804579
1410	-1.391909146	-1.797797571	0.520572513	0.60283976
1411	-1.391909146	-1.797797571	0.520572513	0.60283976
1412	-0.271363315	0.036713264	0.584012547	0.687004994
1413	-0.271363315	0.036713264	0.584012547	0.687004994
1414	0.120124623	0.060216301	0.254667644	0.758322351
1415	0.120124623	0.060216301	0.254667644	0.758322351
1416	-0.92456367	-0.93894434	0.310705887	0.818045392
1417	-0.6870516	-0.779568225	0.325085817	0.75390003
1418	-0.723310024	-0.661803663	0.312137671	0.767392857
1419	-0.509788856	-0.646654576	0.513772502	0.758296832
1420	-0.91507864	-0.932851165	0.318013767	0.817567952
1421	0.145717746	0.310560189	0.351651983	0.699528183
1422	0.145717746	0.310560189	0.351651983	0.699528183
1423	-0.167490774	-0.425495828	0.349257975	0.617682209
1424	-0.167490774	-0.425495828	0.349257975	0.617682209
1425	-0.026320565	-0.232673953	0.329711161	0.657933933
1426	-0.026320565	-0.232673953	0.329711161	0.657933933
1427	0.054279756	-0.30234478	0.360178057	0.513464827
1428	-0.46267511	0.939518917	1.178594626	0.464550885
1429	-0.845668548	-0.367398185	0.453809167	0.507512505
1430	-0.845668548	-0.367398185	0.453809167	0.507512505
1431	0.201455975	0.246318065	0.50700949	0.80486542
1432	0.201455975	0.246318065	0.50700949	0.80486542
1433	0.313692285	0.831300427	0.378613683	0.405196719
1434	0.206143175	0.797017982	0.338496719	0.257894082
1435	0.470723274	0.806410606	0.574316185	0.671488059
1436	0.9121173	1.492136347	0.618029676	0.545743748
1437	1.013476354	0.537704998	0.552549452	0.558890275
1438	0.949983955	0.5080332	0.556078758	0.590875739
1439	-0.610249978	0.239433002	0.412719111	0.172698061
1440	-0.604208326	0.238781291	0.413660027	0.173629419
1441	-0.412618971	0.120502103	0.517879736	0.509741474
1442	0.625078767	-0.178350077	0.92679585	0.556154608
1443	-1.02473934	-1.61608249	0.60960637	0.517577917
1444	-1.02473934	-1.61608249	0.60960637	0.517577917
1445	-1.934299827	-1.722938537	0.624779232	0.748484336
1446	-1.812389732	-1.642205965	0.610710877	0.758296832
1447	-0.153122252	-0.127517781	0.287271407	0.80486542
1448	-0.153122252	-0.118340285	0.283401707	0.794408385
1449	0.378245696	0.133874991	0.302242578	0.582346613
1450	0.378245696	0.14253654	0.30467638	0.605879414
1451	0.983060442	1.391236937	1.022614728	0.722825233
1452	-2.783898592	-2.923670006	0.451395373	0.750896695
1453	-2.801958608	-2.923670006	0.441356355	0.758296832
1454	-1.246168554	-0.713732054	0.641282773	0.572584501
1455	-1.246168554	-0.713732054	0.641282773	0.572584501
1456	1.346395999	2.86221391	0.832561274	0.230560061
1457	1.109146667	1.901490023	0.802233182	0.513464827
1458	0.703288379	0.848156929	0.683951025	0.760792986
1459	1.763399434	2.660056452	0.924480983	0.517577917
1460	1.880591369	2.481068522	1.111253013	0.685602111
1461	1.027562058	1.829851699	0.658517808	0.468575702
1462	1.027562058	1.730282406	0.570839076	0.458101638
1463	1.876904714	2.640076061	0.622960866	0.458101638
1464	1.748982012	2.145572563	0.672092014	0.671488059
1465	0.103916648	-0.070078565	0.331525499	0.687004994
1466	0.85623945	0.627424797	0.798357333	0.752792013
1467	0.85623945	0.627424797	0.798357333	0.752792013
1468	-1.429854035	-1.567777236	0.541964976	0.758296832
1469	-1.429854035	-1.567777236	0.541964976	0.758296832
1470	-0.266154766	-0.241236539	0.830582531	0.823247379
1471	0.03325271	-0.241236539	0.666698293	0.717859533
1472	0.510016692	0.840919972	0.681567755	0.696969188
1473	0.510016692	0.840919972	0.681567755	0.696969188
1474	-0.371173728	-0.308516116	0.494734308	0.79384847
1475	-0.355457033	-0.301119737	0.500792907	0.800387106
1476	-0.528730474	-0.967253149	0.334863365	0.427532849
1477	0.876071244	0.707584662	0.500971791	0.740804579
1478	-1.006711074	-1.427540501	0.486325525	0.556561495
1479	-0.976776441	-1.30899774	0.510099819	0.654176403
1480	-1.314305329	-1.268159042	0.398316311	0.796152953
1481	-1.314305329	-1.268159042	0.398316311	0.796152953
1482	-0.184993772	-0.17860832	0.358782318	0.823247379
1483	-0.184993772	-0.17860832	0.358782318	0.823247379
1484	0.61144931	0.292681594	0.406158123	0.614316898
1485	0.61144931	0.374036248	0.458572702	0.6909444
1486	-0.946058536	-1.323776285	0.879787057	0.703477889
1487	-0.946058536	-1.323776285	0.879787057	0.703477889
1488	2.639374685	1.555165708	0.670122187	0.286856975
1489	2.639374685	1.555165708	0.670122187	0.286856975
1490	1.640427017	1.432344914	0.478079189	0.707570227
1491	1.640427017	1.432344914	0.478079189	0.707570227
1492	-0.176622194	-0.476005619	0.348436283	0.559999126
1493	-0.176622194	-0.476005619	0.348436283	0.559999126
1494	-0.289598557	-0.334917855	0.279908564	0.780101942
1495	-0.593588123	-0.555035168	0.413794832	0.80486542
1496	-0.593588123	-0.510142121	0.44059758	0.77125813
1497	-1.498939896	-2.158907016	0.458147252	0.368443028
1498	-1.496973062	-2.172093252	0.47354209	0.376085609
1499	-0.474506605	-0.842138797	1.284026676	0.752792013
1500	-0.48018204	-0.834621877	1.285283464	0.758160895
1501	-0.083294149	-0.343054113	0.773848123	0.740804579
1502	1.019062191	1.370700836	0.537643242	0.658589307
1503	1.019062191	1.45135049	0.530439059	0.580108455
1504	0.128858214	0.305996892	0.405801637	0.703477889
1505	0.160640334	0.264090253	0.407925278	0.758296832
1506	0.089980534	0.054909665	0.377756831	0.803416401
1507	0.089980534	0.054909665	0.377756831	0.803416401
1508	0.054519166	0.196642845	0.298262114	0.699528183
1509	0.054519166	0.196642845	0.298262114	0.699528183
1510	-0.044660333	0.02750361	0.348044135	0.762603363
1511	-0.044660333	0.02750361	0.348044135	0.762603363
1512	-2.10389874	-1.981170634	0.700442354	0.773043536
1513	1.289565611	1.685606619	0.519875681	0.607437005
1514	-0.914810872	-0.699522903	0.374239694	0.671488059
1515	-0.914810872	-0.699522903	0.374239694	0.671488059
1516	1.361573005	1.090964309	0.50403999	0.687273218
1517	1.35170517	1.069815103	0.496614618	0.685602111
1518	-0.385198943	-0.096409207	0.42438708	0.641138022
1519	-0.385198943	-0.096409207	0.42438708	0.641138022
1520	-0.115157679	0.235842266	0.508624661	0.638238499
1521	-0.119069109	0.245666906	0.505068084	0.626617489
1522	-0.029189044	0.018370383	0.451510434	0.800387106
1523	-0.029189044	0.018370383	0.451510434	0.800387106
1524	-0.447338037	-0.562308118	0.453618049	0.758296832
1525	-0.447338037	-0.562308118	0.453618049	0.758296832
1526	0.224706688	0.285506894	0.314300081	0.769609509
1527	0.199066225	0.29618871	0.30291706	0.748484336
1528	-1.256169933	-1.272410035	0.71072255	0.823247379
1529	-1.97162807	-3.051188548	0.565822692	0.198989602
1530	-1.97162807	-3.051188548	0.565822692	0.198989602
1531	-0.144234014	-0.000357464	0.328265321	0.703477889
1532	-0.144234014	-0.000357464	0.328265321	0.703477889
1533	-1.177702785	-1.193916599	0.329560084	0.817567952
1534	-1.177702785	-1.193916599	0.329560084	0.817567952
1535	1.10808093	1.322501817	0.604441967	0.740804579
1536	-0.045228326	0.016472232	0.3713645	0.777847617
1537	-0.30877999	-0.607364441	0.379423245	0.599875251
1538	-0.600365853	-0.994207005	0.513840546	0.606828882
1539	-0.600365853	-0.994207005	0.513840546	0.606828882
1540	0.046877563	0.249437733	0.552065293	0.726808774
1541	0.046877563	0.249437733	0.552065293	0.726808774
1542	0.634644322	0.719454572	0.475491331	0.772063545
1543	0.513012368	0.663010557	0.544619008	0.758160895
1544	0.110098832	0.086549289	0.367116463	0.812512292
1545	0.110098832	0.086549289	0.367116463	0.812512292
1546	-1.774475026	-2.370856365	0.744049423	0.585374311
1547	-1.774475026	-2.370856365	0.744049423	0.585374311
1548	0.21768786	0.726205921	0.484283138	0.513125943
1549	0.147858545	0.676108137	0.551658086	0.539325586
1550	-0.852527368	-0.216351342	1.185763905	0.687273218
1551	-0.77441684	-0.308395129	1.132697748	0.717859533
1552	-0.16158067	-0.879155616	1.151712892	0.658938178
1553	0.117487295	-0.43886144	1.037026319	0.686356506
1554	-1.935739684	-2.16972204	0.504877549	0.699528183
1555	-1.935739684	-2.16972204	0.504877549	0.699528183
1556	-1.746009278	-2.26570936	0.434889415	0.464550885
1557	-1.827741027	-2.585047285	0.424220866	0.247774142
1558	1.338359028	1.480130529	0.543729305	0.758322351
1559	1.338359028	1.528424931	0.541845446	0.740804579
1560	0.052639265	-0.139319473	0.548742024	0.740804579
1561	0.052639265	-0.139319473	0.548742024	0.740804579
1562	1.559487993	0.544812685	1.170639009	0.574918734
1563	-0.120607276	-0.062251821	0.339825084	0.774186325
1564	-0.120607276	-0.062251821	0.339825084	0.774186325
1565	-0.115717064	-0.437145694	0.758285322	0.703477889
1566	-0.115717064	-0.437145694	0.758285322	0.703477889
1567	0.069122356	-0.061015875	0.283316987	0.699528183
1568	0.069122356	-0.061015875	0.283316987	0.699528183
1569	-1.462993339	-2.745513618	1.570192926	0.578807685
1570	-1.613135404	-3.068197926	1.637144946	0.545743748
1571	-0.329378791	-0.262425626	0.32141922	0.762603363
1572	-0.329378791	-0.23927407	0.319951576	0.754341702
1573	-0.799137154	0.215907335	0.543723996	0.254786469
1574	-0.794795868	0.132826137	0.569067324	0.322856996
1575	-2.233072257	-0.902610927	0.583730623	0.152723077
1576	-2.050113439	-0.854837429	0.619385563	0.193799758
1577	0.805679938	1.007907498	0.479824873	0.714351458
1578	-0.378018389	-0.902109099	0.513184653	0.509741474
1579	-0.378018389	-0.902109099	0.513184653	0.509741474
1580	1.540013718	1.23883245	0.63491536	0.699832864
1581	-0.456703216	0.344261165	0.493092474	0.286856975
1582	-0.1815721	-0.188720334	0.268833838	0.823247379
1583	-0.1815721	-0.188720334	0.268833838	0.823247379
1584	-1.7303298	-2.308190723	0.498193568	0.465970413
1585	-1.734152198	-2.294994454	0.501328357	0.492571283
1586	0.812372759	0.736979684	0.364770076	0.762603363
1587	1.482091045	1.319746127	0.398704992	0.712846205
1588	-0.571176827	0.210369345	0.797190183	0.526218084
1589	0.580117738	0.805821305	0.575046824	0.717859533
1590	-0.062690418	0.314616355	0.355829146	0.506688247
1591	-0.062690418	0.314616355	0.355829146	0.506688247
1592	-0.72388075	-0.686915696	0.633452149	0.815971424
1593	-0.709799451	-0.708193243	0.616464902	0.824304932
1594	-0.711896478	-0.393422647	0.773605827	0.709396598
1595	-0.649203966	-0.352105277	0.836894421	0.735104405
1596	-0.15694706	0.084803688	0.447462722	0.685602111
1597	-0.616503037	-0.427323712	0.40720979	0.699528183
1598	0.933073211	0.597889672	0.342172897	0.514759413
1599	0.728040689	0.524386411	0.453535763	0.70040386
1600	0.764394319	0.456080892	0.371970201	0.573896068
1601	-0.431410945	-0.550415235	0.368125642	0.748484336
1602	-0.419565353	-0.508358759	0.365544038	0.758322351
1603	0.219297288	-0.296450675	0.926147204	0.679158782
1604	0.368507183	-0.311918696	0.957103671	0.630516146
1605	0.386269781	0.485486878	0.330496851	0.750208432
1606	-0.657941631	-0.256730167	0.374342404	0.505163842
1607	-0.657941631	-0.238934152	0.369441139	0.483295438
1608	-0.337744507	-0.101028901	0.571472613	0.708030005
1609	-1.122790092	-0.215850518	0.681119161	0.419688297
1610	-1.15388006	-0.354544204	0.745741072	0.505163842
1611	-0.851767582	0.007812213	0.412458808	0.169228006
1612	-0.86186344	0.007812213	0.416096983	0.169228006
1613	0.048059897	0.062654622	0.427783923	0.822484038
1614	0.048059897	0.062654622	0.427783923	0.822484038
1615	-0.189140701	0.630338168	0.639727206	0.44375734
1616	-0.159986055	0.78396006	0.589378409	0.294514557
1617	1.641244292	1.756351471	0.464183804	0.758322351
1618	1.641244292	1.756351471	0.464183804	0.758322351
1619	-0.460051888	-0.662110505	0.446124316	0.699832864
1620	-0.269731276	-0.044893477	0.333882188	0.642676843
1621	0.114169822	0.169931443	0.429037584	0.791889973
1622	0.174832494	0.222194117	0.390812051	0.794625605
1623	-0.746829003	-0.583719765	0.365328306	0.70111235
1624	-0.746829003	-0.583719765	0.365328306	0.70111235
1625	1.568975651	1.83243506	0.903488061	0.757233981
1626	1.458231449	1.876752575	0.86702723	0.698264721
1627	0.011204101	0.052369914	0.269996527	0.781270225
1628	0.011204101	-0.064569286	0.271524438	0.757233981
1629	0.633143908	-0.222316921	0.454261308	0.249766438
1630	-0.199666244	-0.377362405	0.337341339	0.687004994
1631	-0.199666244	-0.377362405	0.337341339	0.687004994
1632	-0.254630879	-0.297782615	0.330898498	0.794274024
1633	0.067082992	0.54801851	0.389175382	0.458101638
1634	0.067082992	0.54801851	0.389175382	0.458101638
1635	-0.920122546	-0.09222127	0.620885792	0.419688297
1636	-0.920122546	-0.09222127	0.620885792	0.419688297
1637	0.296586083	0.174578521	0.367674152	0.741202929
1638	-1.078595796	-0.314896221	0.647152275	0.464550885
1639	-1.150269392	-0.384107183	0.722347184	0.506688247
1640	1.125153492	1.740432715	0.534450137	0.505163842
1641	0.592276913	0.870920855	0.523676018	0.687273218
1642	0.248286484	0.524106046	0.41763094	0.648654549
1643	0.420619093	0.932725708	0.399922693	0.44375734
1644	0.604774535	-0.023733616	0.956228345	0.657933933
1645	0.457341063	-0.015001643	1.120565079	0.714351458
1646	2.5851964	3.05834651	0.839132873	0.676361068
1647	-0.383048928	-0.737624067	0.730179348	0.699528183
1648	-0.383048928	-0.737624067	0.730179348	0.699528183
1649	0.011619227	0.566552316	0.488201623	0.483295438
1650	0.011619227	0.566552316	0.488201623	0.483295438
1651	-0.130576691	0.911007792	0.581677481	0.267559929
1652	-0.130576691	0.911007792	0.581677481	0.267559929
1653	0.171265846	0.382289648	0.661370848	0.748484336
1654	0.03535618	-0.055429359	0.678067027	0.791407468
1655	-0.520424574	0.287169486	0.859945591	0.525077202
1656	0.857382469	0.737363372	0.646661314	0.771126044
1657	0.853592376	0.726915956	0.655351001	0.769609509
1658	1.580136165	1.607398917	0.887521514	0.82302295
1659	1.882010746	1.667564849	0.456225735	0.699528183
1660	1.701856828	1.479963909	0.518875989	0.703477889
1661	-1.500321227	-3.066879749	0.697143918	0.152723077
1662	-1.500321227	-3.066879749	0.697143918	0.152723077
1663	-0.852070272	-0.837916327	0.331803573	0.819750013
1664	-0.852070272	-0.837916327	0.331803573	0.819750013
1665	-0.213971595	-0.536229475	0.656857126	0.693014308
1666	-0.213971595	-0.536229475	0.656857126	0.693014308
1667	-0.598423001	0.560609391	0.450946971	0.152723077
1668	-0.598423001	0.542696217	0.45243651	0.152723077
1669	0.570225453	1.772183824	0.691924849	0.286856975
1670	0.277466127	0.704102134	0.403704384	0.506688247
1671	-0.839719659	-1.044118799	0.806050499	0.758296832
1672	-0.713617367	-0.450071185	0.570960982	0.699528183
1673	-0.660083166	-0.428164538	0.526525094	0.703477889
1674	-0.949122983	-0.776996345	0.347190902	0.689605176
1675	-0.940118212	-0.779308041	0.34765305	0.699528183
1676	-1.08483448	-1.119866043	0.366103419	0.802402331
1677	-1.08483448	-1.121613234	0.365705357	0.800387106
1678	-1.819974685	-1.723155876	0.678157372	0.784972637
1679	-1.819974685	-1.669390063	0.695515016	0.759720757
1680	-1.007398701	-0.895174086	0.321396517	0.740804579
1681	0.827903432	1.108642608	0.461388039	0.66858433
1682	-0.479001558	-0.294382927	0.279512639	0.648654549
1683	-0.676642217	-0.403921718	0.41603107	0.649637977
1684	-1.373671764	-1.620353003	0.593203716	0.707570227
1685	-1.70130707	-2.024814009	0.762828485	0.712846205
1686	1.228927302	1.102690121	0.853896848	0.782029007
1687	-0.224115467	0.043909168	0.48465426	0.687004994
1688	-0.689237166	-0.66311046	0.518637711	0.817567952
1689	-0.843504161	-0.716071618	0.516891429	0.758322351
1690	-0.057355211	-0.129416354	0.357889385	0.770032891
1691	-0.066606174	-0.129416354	0.354243292	0.774186325
1692	0.157974263	0.098324921	0.39640561	0.781979349
1693	0.157974263	0.098324921	0.39640561	0.781979349
1694	-0.060030837	-0.673518094	0.4725121	0.428615525
1695	-0.060030837	-0.673518094	0.4725121	0.428615525
1696	-0.420282741	-0.450374916	0.469829077	0.812512292
1697	-1.655657863	-0.879868756	0.351842944	0.152723077
1698	0.298924543	0.377490951	0.427367696	0.77125813
1699	0.380398786	0.414819871	0.440567285	0.806864118
1700	-0.822547382	-0.910332679	0.826098734	0.800387106
1701	-0.822547382	-0.910332679	0.826098734	0.800387106
1702	-1.666317701	-1.905944904	0.36300763	0.648654549
1703	-1.655261421	-1.88476487	0.360924499	0.65533532
1704	-0.596083307	-0.963169649	0.688399544	0.687004994
1705	-3.042029762	-2.667710304	1.091378542	0.740322812
1706	-1.047834528	-1.350637113	0.815695457	0.726808774
1707	0.022406614	-0.034680341	0.547949038	0.800387106
1708	0.022406614	-0.034680341	0.547949038	0.800387106
1709	-0.984330773	1.000649631	1.608452904	0.464550885
1710	-1.094342199	-0.39675004	0.625150061	0.49336309
1711	-0.367319107	-0.10353355	0.534654183	0.699528183
1712	0.790050662	1.052483094	0.425695787	0.671488059
1713	-0.512493414	-0.704921847	0.645114741	0.750208432
1714	-0.512493414	-0.704921847	0.645114741	0.750208432
1715	-1.828795504	-3.164064169	0.504801444	0.152723077
1716	-1.828795504	-2.884759188	0.652433313	0.286856975
1717	-0.292576381	-1.353481352	1.32241631	0.585374311
1718	-0.615922444	-1.679201366	0.812180095	0.427532849
1719	0.23014673	0.065442355	0.902248406	0.77125813
1720	0.324174291	0.06553673	0.835173049	0.748484336
1721	0.72642709	-0.329345643	0.778153581	0.408971724
1722	-0.722503614	-0.797636325	0.750542352	0.800387106
1723	-1.539959693	-1.1689125	0.553367936	0.642676843
1724	-0.27489652	-0.597442627	0.641560199	0.687273218
1725	-0.631350574	-0.370844978	0.43215712	0.669680065
1726	-0.46519993	-0.380483606	0.518780988	0.774380348
1727	2.226636696	2.346737862	0.808865525	0.782029007
1728	2.226636696	2.346737862	0.808865525	0.782029007
1729	-1.007572723	-1.610573947	0.482530285	0.458101638
1730	-1.007572723	-1.610573947	0.482530285	0.458101638
1731	-0.602031446	-0.313373848	0.553972622	0.689278548
1732	-1.442933965	-1.280066944	1.007778668	0.775751355
1733	-1.102990675	0.070240691	0.565343442	0.169228006
1734	0.273325615	0.112889705	0.348764722	0.703477889
1735	0.116083125	-0.036099531	0.300126117	0.687273218
1736	0.116083125	-0.036099531	0.300126117	0.687273218
1737	-0.649451345	-0.908386257	0.567773095	0.699528183
1738	-0.790654039	-1.17061462	0.444166292	0.561186344
1739	0.688926089	0.685897666	0.578098864	0.823360667
1740	-0.90758332	-1.212994893	0.384454808	0.590875739
1741	-0.892944586	-1.260231515	0.392234817	0.525077202
1742	-0.053279188	-0.154155811	0.378124918	0.758296832
1743	-0.053279188	-0.154155811	0.378124918	0.758296832
1744	-0.245534803	-0.509136103	0.411632017	0.65533532
1745	-0.215758487	-0.574749803	0.397806963	0.539805785
1746	-0.28559213	-0.691786866	0.509290013	0.58846035
1747	-0.28559213	-0.691786866	0.509290013	0.58846035
1748	-0.127316588	-0.27789101	0.357509079	0.704013042
1749	-1.075924134	-1.3829859	0.716020249	0.703477889
1750	-0.330418719	-0.250873927	0.514320376	0.780101942
1751	-0.505664989	-0.296261696	0.604976952	0.73967626
1752	-0.316193098	-0.271189884	0.320849078	0.786633173
1753	-0.323445597	-0.247045732	0.313824209	0.758322351
1754	-0.221893257	-0.503598717	0.406461536	0.638238499
1755	-0.221893257	-0.503598717	0.406461536	0.638238499
1756	-0.051333228	0.140151896	0.473010441	0.712846205
1757	0.03557511	0.149211226	0.499178398	0.758623684
1758	0.18531864	-0.185651882	0.437734533	0.563870462
1759	0.158632877	-0.141783378	0.473148609	0.65533532
1760	-0.126318872	-0.248902417	0.326370742	0.724969935
1761	-0.126318872	-0.248902417	0.326370742	0.724969935
1762	-0.16747877	-0.138598439	0.355947491	0.806864118
1763	-0.16747877	-0.138598439	0.355947491	0.806864118
1764	-0.630933899	-0.535259103	0.371903432	0.758296832
1765	0.067034715	-0.005919335	0.336320985	0.759720757
1766	-0.244811171	-0.143032684	0.374640519	0.758160895
1767	-0.900830549	-0.842429426	1.067234506	0.817567952
1768	-0.16430551	-0.11248656	0.332126398	0.779471402
1769	-0.16430551	-0.11248656	0.332126398	0.779471402
1770	0.164449896	0.228227148	0.647484394	0.800638315
1771	0.164449896	0.228227148	0.647484394	0.800638315
1772	-0.842534845	-1.006625612	0.481324376	0.740804579
1773	-0.751922458	-0.966904223	0.474089284	0.699832864
1774	-0.430030849	-0.38970656	0.434295193	0.803416401
1775	0.132650044	-0.304044269	0.555740087	0.614316898
1776	0.132650044	-0.304044269	0.555740087	0.614316898
1777	0.155826738	-0.322393443	0.361535504	0.422086795
1778	0.155826738	-0.322393443	0.361535504	0.422086795
1779	-0.704704833	-1.16396541	0.574099438	0.607437005
1780	-0.704704833	-1.16396541	0.574099438	0.607437005
1781	-1.854053259	-3.221680264	0.799017221	0.26308542
1782	-1.854053259	-3.221680264	0.799017221	0.26308542
1783	-0.374628302	0.071193955	0.453294259	0.513764692
1784	0.084642721	0.714718214	0.513257649	0.458101638
1785	0.225339292	1.029083928	0.517464436	0.31958068
1786	0.203900851	0.859717553	0.469897737	0.388361686
1787	-1.290908605	-1.287767982	0.474701987	0.823360667
1788	-0.139946321	0.062325006	0.448516711	0.699954651
1789	-0.139946321	0.062325006	0.448516711	0.699954651
1790	-0.28321618	-0.604477617	0.501161883	0.65533532
1791	-0.255460055	-0.604477617	0.514651746	0.642676843
1792	0.203144503	-0.333815436	0.672347387	0.58846035
1793	-0.373351456	-0.646515134	0.389437934	0.636509349
1794	0.562710561	1.343020102	0.443699801	0.254786469
1795	-0.285040741	-0.387216772	0.321945033	0.748484336
1796	-0.285040741	-0.387216772	0.321945033	0.748484336
1797	-1.713300574	-2.129705608	0.863983736	0.698369125
1798	-1.713300574	-2.129705608	0.863983736	0.698369125
1799	-1.055203486	-0.984020674	0.327841662	0.762603363
1800	-0.158810592	-0.045645514	0.409100398	0.758296832
1801	-0.158810592	-0.045645514	0.409100398	0.758296832
1802	1.853943944	1.389338806	0.796714886	0.671488059
1803	1.853943944	1.389338806	0.796714886	0.671488059
1804	0.097288871	0.754216979	0.855502487	0.606828882
1805	0.094961607	0.749479642	0.854546588	0.606856586
1806	-1.29575721	-1.498673955	0.612435777	0.748484336
1807	-1.28552022	-1.498673955	0.611330411	0.740804579
1808	0.176391691	0.142246561	0.32774051	0.800387106
1809	0.176391691	0.142246561	0.32774051	0.800387106
1810	-1.010173655	-1.447865461	0.628155592	0.637898371
1811	-0.999757362	-1.447865461	0.625713943	0.630026545
1812	-1.213561702	-0.972179001	0.853127036	0.75390003
1813	0.770594442	1.209842777	0.327723316	0.446741129
1814	-1.237084699	0.261835024	0.357963774	0.008243418	1814_DENND1A_S520	-1.498919722
1815	-1.237084699	0.261835024	0.357963774	0.008243418	1815_DENND1A_S523	-1.498919722
1816	-0.960188568	-0.985549748	0.498406248	0.817567952
1817	-1.039574641	-1.258371234	0.539973527	0.712846205
1818	-1.039574641	-1.258371234	0.539973527	0.712846205
1819	-4.15368309	-3.156110847	0.937607528	0.509741474
1820	-4.15368309	-3.156110847	0.937607528	0.509741474
1821	0.222430192	0.118445814	0.396645549	0.758296832
1822	0.231463538	0.111559471	0.39867716	0.750208432
1823	1.222423363	1.047634612	0.283219705	0.66220639
1824	-0.907456669	-1.093893369	0.361715191	0.687273218
1825	-0.907456669	-1.093893369	0.361715191	0.687273218
1826	0.11872246	0.220340202	0.374864416	0.758160895
1827	-0.816587494	-1.459549189	0.853237924	0.61274106
1828	-0.615245919	-0.624120966	0.582291819	0.823247379
1829	-0.522671253	-0.837518136	0.578926261	0.685602111
1830	-0.009737933	0.688989086	0.771151625	0.539805785
1831	0.474307689	-0.403746545	0.68350665	0.460414836
1832	0.491653141	-0.406645632	0.695533471	0.458101638
1833	0.557547314	0.083624454	0.523298809	0.539805785
1834	-0.007526696	0.566271298	0.595394805	0.52006493
1835	-0.007526696	0.566271298	0.595394805	0.52006493
1836	-0.089630162	-0.041683585	1.018507637	0.817567952
1837	-0.089630162	-0.041683585	1.018507637	0.817567952
1838	-0.765677675	-1.14989782	0.720838417	0.687273218
1839	-0.219512057	-0.091039114	1.022527476	0.794274024
1840	-0.456164858	-0.0616547	1.08878386	0.730883134
1841	-0.598099137	-0.853144238	0.613673262	0.707570227
1842	-0.050734749	0.774033127	0.556678118	0.355965619
1843	-0.050734749	0.774142054	0.55332409	0.353381029
1844	0.514705789	1.378455376	0.796398018	0.505163842
1845	0.225542782	0.139611355	0.443097063	0.769517813
1846	-0.009564153	-0.002305496	0.362333229	0.823247379
1847	-0.009564153	-0.002305496	0.362333229	0.823247379
1848	-0.073372031	-0.153252224	0.425530986	0.771126044
1849	-0.950292099	-0.034403768	0.557679641	0.286856975
1850	-1.327385044	-1.481804579	0.675533699	0.758322351
1851	1.563661575	0.6432713	0.713543453	0.458101638
1852	1.563661575	0.422702568	0.7661583	0.353381029
1853	-0.471684883	-0.682096869	0.543573428	0.722819982
1854	-0.471684883	-0.682096869	0.543573428	0.722819982
1855	-2.112944532	-1.276561094	0.869548775	0.520933392
1856	0.279310043	-0.119502356	0.775193655	0.687273218
1857	0.799140486	0.267746171	0.435829722	0.460414836
1858	-4.626686478	-5.297385121	1.117546733	0.671488059
1859	-4.626686478	-5.297385121	1.117546733	0.671488059
1860	0.122193573	-0.732232228	0.46577698	0.230296214
1861	1.405397141	0.896158506	0.756420879	0.642676843
1862	-0.183333465	0.091274169	0.456972062	0.671488059
1863	-0.827695835	-0.913072805	0.396949584	0.759720757
1864	-0.827695835	-0.913072805	0.396949584	0.759720757
1865	1.494239193	2.434107971	0.863118329	0.509741474
1866	-0.68222822	-1.545181116	0.381368397	0.152723077
1867	-1.370878428	-2.655515378	1.88264324	0.641138022
1868	-1.370878428	-1.407932094	1.847796334	0.823247379
1869	-0.050205746	-0.991744456	0.459061723	0.193799758
1870	1.405775702	1.507046978	0.401081082	0.758296832
1871	1.406020939	1.501420478	0.400306312	0.758322351
1872	1.639649677	0.447815567	0.690584501	0.286856975
1873	0.338762041	0.780605018	0.420141552	0.507512505
1874	0.338762041	0.780605018	0.420141552	0.507512505
1875	0.228810936	-0.061430749	0.639899429	0.699832864
1876	0.228810936	0.035848883	0.646363774	0.750208432
1877	0.63299402	0.367867815	0.527455296	0.687273218
1878	0.63299402	0.367867815	0.527455296	0.687273218
1879	0.018166071	-0.173712762	0.438446547	0.703477889
1880	-0.424846426	-0.432360217	1.16792751	0.823360667
1881	-0.819415677	-0.78793409	0.345140115	0.803568464
1882	0.207039671	-0.53385521	0.552918421	0.419688297
1883	0.19602354	-0.610528802	0.484249908	0.280488923
1884	1.058505517	0.426317701	0.62906723	0.509741474
1885	0.914434934	0.12072702	0.563721951	0.380561931
1886	-0.368310218	-0.539435515	0.522652456	0.748484336
1887	-1.304678792	-1.535094182	0.675163144	0.740804579
1888	-1.273297113	-1.546355129	0.6824681	0.714351458
1889	0.463733339	-0.212732452	0.520305355	0.428615525
1890	0.63922403	0.048882333	0.611532712	0.52006493
1891	-0.493235167	-1.462142861	0.563690027	0.286856975
1892	-0.519066237	-0.925331166	0.483386546	0.566698086
1893	-0.519066237	-0.925331166	0.483386546	0.566698086
1894	1.741290975	0.905637386	0.653096388	0.464008258
1895	1.571793723	0.905637386	0.562217573	0.488799831
1896	0.083551893	-0.34750978	0.417867905	0.514759413
1897	0.087753269	-0.34750978	0.414638834	0.513125943
1898	0.786544162	0.846450557	0.345363185	0.773146249
1899	0.786544162	0.843683869	0.344591005	0.774186325
1900	0.670519587	0.351500278	0.728464436	0.703477889
1901	0.905583879	0.431718474	0.901476156	0.687004994
1902	-1.342964798	-0.776955195	2.414035774	0.758322351
1903	-1.342964798	-0.776955195	2.414035774	0.758322351
1904	-1.606406581	-1.258692205	0.727056767	0.699528183
1905	-1.606406581	-1.262354473	0.72643251	0.699528183
1906	0.36069701	0.174492647	0.554612007	0.740804579
1907	-1.882651877	-2.027712298	0.74680805	0.771126044
1908	-0.528922837	-0.135368831	0.826174286	0.699528183
1909	-0.528922837	-0.135368831	0.826174286	0.699528183
1910	0.298521924	1.344833076	0.50346861	0.169228006
1911	0.357706898	1.331541578	0.513248871	0.203378773
1912	-0.066213284	0.003991516	0.305976367	0.758322351
1913	-0.066213284	0.003991516	0.305976367	0.758322351
1914	-0.274763885	-0.17462186	0.292250299	0.740322812
1915	-0.274763885	-0.17462186	0.292250299	0.740322812
1916	-0.145629772	-0.056489261	0.308434771	0.751943507
1917	-0.145629772	-0.056489261	0.308434771	0.751943507
1918	-0.16655799	-0.68717629	1.00531201	0.687273218
1919	-0.16655799	-0.68717629	1.00531201	0.687273218
1920	-0.357989018	-0.037655993	0.48108904	0.646716958
1921	-0.357989018	-0.037655993	0.48108904	0.646716958
1922	-0.261703712	-0.132080481	0.325553111	0.714405584
1923	-0.261703712	-0.132080481	0.325553111	0.714405584
1924	0.606668594	0.994338965	0.447804041	0.574918734
1925	0.106877105	0.22658477	0.358309566	0.740804579
1926	0.118149467	0.21905869	0.347321672	0.751943507
1927	-0.34038205	-0.392841493	0.285476526	0.77125813
1928	-0.34038205	-0.392841493	0.285476526	0.77125813
1929	-0.491102415	-0.377027169	0.254431134	0.700450397
1930	-0.491102415	-0.377027169	0.254431134	0.700450397
1931	-0.814345694	-0.922969563	0.382876659	0.75390003
1932	-0.844114709	-0.943124655	0.389129472	0.758296832
1933	0.121143019	-0.443339375	0.459194009	0.458101638
1934	0.121143019	-0.443339375	0.459194009	0.458101638
1935	-0.526014227	-0.806540688	0.529855121	0.687004994
1936	-0.526014227	-0.806540688	0.529855121	0.687004994
1937	-0.32222282	-0.45179013	0.780620383	0.774186325
1938	-0.252828944	-0.398951583	0.838682927	0.773146249
1939	-0.29241824	-0.223313269	0.42019963	0.774186325
1940	-1.69973197	-1.381107191	0.42538102	0.614316898
1941	-1.660503435	-1.381107191	0.450232815	0.659828385
1942	-2.27854445	-1.851665775	0.445434168	0.521448687
1943	-2.296139884	-1.820361038	0.496762964	0.521448687
1944	-1.937143636	-1.75473187	0.465878132	0.725384454
1945	2.849281692	2.488439616	0.839075883	0.703477889
1946	2.849281692	2.488439616	0.839075883	0.703477889
1947	-0.083901659	0.699867708	0.674116091	0.464550885
1948	-0.083901659	0.699867708	0.674116091	0.464550885
1949	-1.083500868	-1.029379522	0.614661593	0.805039761
1950	-1.336020833	-1.342623939	0.578144271	0.823247379
1951	-1.569090176	-1.512678593	0.537879171	0.800387106
1952	-0.725105232	-0.267732537	1.145467739	0.722825233
1953	-0.723906404	-0.618730684	0.346372499	0.750190807
1954	-0.723906404	-0.618730684	0.346372499	0.750190807
1955	-0.576462954	-0.389357801	0.433386693	0.703477889
1956	-0.75572747	-0.583455998	0.361267688	0.699528183
1957	-0.821443999	-0.907555503	0.456242682	0.77125813
1958	-0.061586701	0.034737373	0.262013743	0.726808774
1959	-0.061586701	0.034737373	0.262013743	0.726808774
1960	-0.260021854	-0.21774633	0.330764439	0.793121409
1961	-0.651858017	-0.607080596	0.452487515	0.800638315
1962	-0.458586135	-0.705197252	0.386937751	0.65533532
1963	-1.145909137	-2.030890942	0.841762417	0.513125943
1964	-1.159498698	-2.030890942	0.835556708	0.513464827
1965	0.059669647	0.848232011	0.459914562	0.26308542
1966	0.022007296	0.848232011	0.464813105	0.249766438
1967	-0.368790217	-0.629858623	0.440925144	0.671281619
1968	-0.368790217	-0.629858623	0.440925144	0.671281619
1969	-0.242987849	-0.297826959	0.486544621	0.797658716
1970	-0.503682304	-0.563876634	0.771824092	0.806864118
1971	-0.408102133	-0.735480849	0.793202863	0.708797308
1972	-1.923514592	-1.56129695	0.721492848	0.687273218
1973	-2.177246046	-2.437637965	0.553874703	0.699528183
1974	0.011558309	-0.651990324	0.669128462	0.513464827
1975	0.011558309	-0.651990324	0.669128462	0.513464827
1976	0.067020962	-0.434216623	0.62995681	0.607437005
1977	0.067020962	-0.434216623	0.62995681	0.607437005
1978	-0.016995385	-0.436863492	0.562817188	0.614316898
1979	-0.016995385	-0.436863492	0.562817188	0.614316898
1980	0.073362005	0.256140443	0.843918218	0.759720757
1981	-0.223428467	-0.642020777	0.607720692	0.638238499
1982	-0.223428467	-0.642020777	0.607720692	0.638238499
1983	-0.501512942	-0.486421608	0.330602806	0.818119489
1984	-0.501512942	-0.486421608	0.330602806	0.818119489
1985	-0.030635558	0.053483907	0.281390407	0.750208432
1986	-0.030635558	0.053483907	0.281390407	0.750208432
1987	-0.515718502	-1.08276503	0.655797607	0.556737776
1988	-0.571071184	-1.03716546	0.625066762	0.614316898
1989	-0.343813523	-0.19936921	0.443757239	0.748484336
1990	-0.343813523	-0.19936921	0.443757239	0.748484336
1991	0.473146363	0.399404252	0.371585619	0.771126044
1992	0.674296695	0.468149644	0.396489032	0.689605176
1993	-2.454375267	-3.207637807	0.645197065	0.464550885
1994	-2.454375267	-3.207637807	0.645197065	0.464550885
1995	-2.114726686	-2.36765941	0.470729202	0.686356506
1996	-1.190453139	-2.194593588	0.754499937	0.419688297
1997	-1.182375821	-2.194593588	0.757349931	0.419688297
1998	-1.125478804	-0.82874994	0.490952158	0.668962635
[truncated: 707 more rows]
