# Supplementary material for: Biological characteristics of aging in human acute myeloid leukemia cells: the possible importance of aldehyde dehydrogenase, the cytoskeleton and altered transcriptional regulation
Source: publisher site journal article supplement (doi:10.18632/aging.202361), 2020-12-20
Supplement: Supplementary file [file aging-v12i24-202361-supplementary-material-SD2.pdf]

## SUPPLEMENTARY TABLES

**Supplementary Table 1. Clinical and biological characteristics of individual patients included in the study.**

| ID                                                                | Sex | Age | FAB | CD34 | Karyotype                    | <i>FLT3</i>        | <i>NPM1</i> |
|-------------------------------------------------------------------|-----|-----|-----|------|------------------------------|--------------------|-------------|
| <b>High-risk patients, i.e. adverse cytogenetic abnormalities</b> |     |     |     |      |                              |                    |             |
| A1-P105                                                           | F   | 64  | M1  | +    | Complex <sup>2</sup>         | WT                 | WT          |
| A2-P112                                                           | F   | 51  | M0  | +    | Complex                      | WT                 | WT          |
| A3-P114                                                           | M   | 72  | M1  | +    | Complex                      | WT                 | -           |
| A4-P117                                                           | F   | 64  | M1  | +    | Complex                      | ITD                | WT          |
| A5-P122                                                           | M   | 84  | M1  | +    | Complex                      | WT                 | WT          |
| A6-P130                                                           | M   | 78  | M0  | -    | Complex                      | WT                 | WT          |
| A7-P133                                                           | M   | 74  | M4  | -    | Complex                      | WT                 | -           |
| A8-P134                                                           | M   | 80  | M1  | +    | Complex                      | -                  | -           |
| A9-P140                                                           | F   | 50  | M2  | +    | Complex                      | WT                 | WT          |
| A10-P128                                                          | M   | 77  | M2  | +    | Complex                      | ITD                | WT          |
| A11-P115                                                          | F   | 87  | M0  | +    | del 5                        | WT                 | WT          |
| A12-P107                                                          | M   | 73  | M2  | +    | Monosomal                    | ITD                | WT          |
| A13-P123                                                          | M   | 81  | M2  | -    | -7                           | WT                 | WT          |
| A14-P124                                                          | M   | 76  | M5  | +    | del 12, -7                   | WT                 | WT          |
| A15-P129                                                          | M   | 63  | M5  | +    | -7                           | WT                 | WT          |
| <b>Low-risk patients, i.e. favorable genetic abnormalities</b>    |     |     |     |      |                              |                    |             |
| F1-P110                                                           | F   | 67  | M4  | +    | t(16;16), +22                | -                  | -           |
| F2-P116                                                           | M   | 36  | M5  | +    | inv16, +8, +22               | ITD                | WT          |
| F3-P139                                                           | M   | 66  | M5  | +    | t(16;16)                     | WT                 | WT          |
| F4-P141                                                           | M   | 79  | M2  | -    | inv16, del 7                 | WT                 | WT          |
| F5-P127                                                           | M   | 41  | M1  | +    | t(8;21), del 9, -3, -20, -22 | WT                 | WT          |
| F6-P131                                                           | F   | 33  | M1  | +    | t(8;21)                      | WT                 | WT          |
| F7-P137                                                           | F   | 74  | M4  | +    | t(8;21)                      | ITD                | WT          |
| F8-P144                                                           | F   | 66  | M4  | +    | t(8;21)                      | WT                 | WT          |
| F9-P154                                                           | M   | 47  | M4  | -    | t(8;21)                      | WT                 | WT          |
| F10-P101                                                          | M   | 50  | M2  | -    | Normal                       | WT                 | INS         |
| F11-P118                                                          | F   | 61  | M5  | -    | Normal                       | WT                 | INS         |
| F12-P120                                                          | F   | 68  | M5  | -    | Normal                       | WT                 | INS         |
| F13-P125                                                          | M   | 64  | M5  | -    | Normal                       | WT                 | INS         |
| F14-P138                                                          | M   | 65  | M4  | -    | Normal                       | WT                 | INS         |
| F15-P143                                                          | M   | 64  | M1  | +    | Normal                       | WT                 | INS         |
| F16-P153                                                          | F   | 70  | M4  | +    | Normal                       | WT                 | INS         |
| F17-P155 <sup>3</sup>                                             | F   | 71  | M0  | -    | Normal                       | ITD <sup>low</sup> | INS         |
| F18-P142 <sup>4</sup>                                             | M   | 33  | M2  | +    | Normal                       | WT                 | WT          |

The table presents individually patient characteristics (sex, gender), morphological (FAB classification) and molecular signs of differentiation (CD34 expression), karyotype and *FLT3/NPM1* mutational status<sup>1</sup>.

<sup>1</sup>Abbreviations: FAB, French-American-British; INS, a 4 bp-insertion/duplication; ITD, internal tandem duplication; WT, wild-type; -, not determined.

<sup>2</sup>Defined as  $\geq 3$  cytogenetic abnormalities.

<sup>3</sup>The patient had a low ITD ratio and could therefore be classified as having a favorable prognosis. He was initially classified as ITD negative but later reclassified based on a new analysis.

<sup>4</sup>This patient has *CEBPA* mutation.

**Supplementary Table 2. Patient treatment and survival.**

| <b>ID</b>                                                         | <b>Treatment<sup>1</sup></b>                                                                     | <b>Survival (months)</b> |
|-------------------------------------------------------------------|--------------------------------------------------------------------------------------------------|--------------------------|
| <b>High risk patients, i.e. adverse cytogenetic abnormalities</b> |                                                                                                  |                          |
| A1-P105                                                           | Best supportive care                                                                             | <1                       |
| A2-P112                                                           | AML-stabilizing therapy based on ATRA and valproic acid                                          | 3                        |
| A3-P114                                                           | AML-stabilizing therapy based on ATRA and valproic acid                                          | 13                       |
| A4-P117                                                           | Best supportive care                                                                             | 3                        |
| A5-P122                                                           | AML-stabilizing therapy based on ATRA and valproic acid                                          | 5                        |
| A6-P130                                                           | Valproic acid plus hydroxyurea                                                                   | 3                        |
| A7-P133                                                           | Best supportive care                                                                             | <1                       |
| A8-P134                                                           | AML-stabilizing therapy based on ATRA and valproic acid                                          | 1                        |
| A9-P140                                                           | Intensive chemotherapy followed by allogeneic SCT                                                | >46 <sup>2</sup>         |
| A10-P128                                                          | Best supportive care                                                                             | <1                       |
| A11-P115                                                          | ATRA, valproic acid, low-dose cytarabine                                                         | <1                       |
| A12-P107                                                          | Best supportive care                                                                             | 2                        |
| A13-P123                                                          | ATRA, valproic acid, low-dose cytarabine                                                         | 16                       |
| A14-P124                                                          | Valproic acid plus hydroxyurea                                                                   | 6                        |
| A15-P129                                                          | Best supportive care                                                                             | 6                        |
| <b>Low risk patients, i.e. favorable genetic abnormalities</b>    |                                                                                                  |                          |
| F1-P110                                                           | Best supportive care                                                                             | <1                       |
| F2-P116                                                           | Death from acute GVHD after allogeneic SCT in second CR                                          | 25                       |
| F3-P139                                                           | ATRA, valproic acid, low-dose cytarabine                                                         | <1                       |
| F4-P141                                                           | Valproic acid plus hydroxyurea                                                                   | 3                        |
| F5-P127                                                           | Lost from follow-up                                                                              | -                        |
| F6-P131                                                           | Intensive chemotherapy followed by autologous SCT                                                | >56                      |
| F7-P137                                                           | Azacitidine                                                                                      | 3                        |
| F8-P144                                                           | Intensive induction and consolidation chemotherapy                                               | >38                      |
| F9-P154                                                           | High-dose chemotherapy                                                                           | >144                     |
| F10-P101                                                          | One cycle of intensive induction therapy with CR, no further chemotherapy due to severe toxicity | 28                       |
| F11-P118                                                          | Intensive induction therapy with CR, toxic death during consolidation                            | 2                        |
| F12-P120                                                          | Death from hyperleukocytosis                                                                     | <1                       |
| F13-P125                                                          | Intensive induction with CR, toxic death during consolidation therapy                            | 2                        |
| F14-P138                                                          | Intensive chemotherapy followed by autologous SCT, non-relapse death                             | 14                       |
| F15-P143                                                          | Intensive induction with CR, toxic death during consolidation chemotherapy                       | 2                        |
| F16-P153                                                          | AML-stabilizing therapy based on ATRA and valproic acid                                          | 2                        |
| F17-P155                                                          | Best supportive care                                                                             | 2                        |
| F18-P142                                                          | Intensive chemotherapy followed by autologous SCT                                                | >44                      |

<sup>1</sup>Abbreviations: ATRA, all-trans retinoic acid; CR, complete remission; GVHD, Graft versus host disease; SCT: stem cell transplantation.

<sup>2</sup>The sign > means that the patient is still alive without relapse.

**Supplementary Table 3. Classification of differentially expressed proteins and phosphorylated phosphoproteins found in the comparative studies between nine elderly low-risk and nine younger low-risk patients based on hallmarks of aging as explained in previous publications [1–3].**

| Classification                                         | Genomic stability, DNA repair | Mitosis, cell cycle                                               | Epigenetics, chromatin, transcription, RNA splicing, ribosome                                                                                                                                                      | Protein homeostasis, metabolism, protein modification                                 | Mitochondria, metabolism                                                              | Cytoskeleton, actin polarization                      | Intracellular ER <sup>1</sup> -Golgi trafficking | Intracellular signaling       | Extracellular secretion | Membrane structure | Tumor suppressor                      | Regulation of senescence | Regulation of apoptosis |
|--------------------------------------------------------|-------------------------------|-------------------------------------------------------------------|--------------------------------------------------------------------------------------------------------------------------------------------------------------------------------------------------------------------|---------------------------------------------------------------------------------------|---------------------------------------------------------------------------------------|-------------------------------------------------------|--------------------------------------------------|-------------------------------|-------------------------|--------------------|---------------------------------------|--------------------------|-------------------------|
| Altered protein level in low-risk patients             | APTX<br>CAAP1<br>NME3<br>POLB | CDC27<br>KIAA1279<br>NUMB                                         | CHD2<br>MARS2<br>MINA<br>RPS6KA4<br>WARS2                                                                                                                                                                          | ASPH<br>BAG2<br>CDC27<br>KIAA1279<br>NME3<br>PDP1<br>PTPLAD2<br>STX7<br>UFSP2<br>NUMB | ALDH2<br>CLC<br>COX6A1<br>KIAA1279<br>MARS2<br>NXT2<br>PDF<br>PDP1<br>PTDSS1<br>WARS2 | CAP1<br>GIT1<br>SKAP2                                 | KIAA1279<br>NXT2<br>STX7                         | GIT1<br>MOB4<br>NENF<br>SKAP2 | NENF                    | PTDSS1<br>NUMB     | PTPLAD2                               |                          | CAAP1                   |
|                                                        | RMI1<br>TOX4<br>TP53BP1       | CBX1<br>HECA<br>TMPO                                              | ARID1A<br>AHNAK<br>CBX1<br>DDX41<br>IRF2BP1<br>KANS1<br>KDM3B<br>RERE<br>RPS6KA4<br>SP100<br>TCEAL3<br>TMPO<br>TOX4<br>TP53BP1<br>ZMYND8                                                                           | DTNBP1                                                                                |                                                                                       | ARIDA1<br>FAM21C<br>FNBP1L<br>LSP1<br>MYO18A<br>REPS1 | BIN1<br>REPS1<br>SEC61B<br>WDR44                 | DOCK5<br>FAM65B               | LILRB3                  |                    | BIN1<br>TP53BP1                       |                          | BIN1<br>RERE            |
| Increased phosphorylation in elderly low-risk patients | LIG1                          | CDK1<br>CDK2<br>ESCO2<br>FAM83H<br>FOXK2<br>GSG2<br>INCENP<br>RB1 | AATF<br>ATAD2<br>BCLAF1<br>EEF2<br>FOXF2<br>CHD4<br>CHD9<br>CNP<br>EIF3F<br>ESCO2<br>FOXK2<br>GSG2<br>HIST1H1D<br>IGF2BP1<br>ING5<br>KMT2A<br>NPM1<br>PPIG<br>PRPF40A<br>RPRD2<br>RRP1B<br>RRP36<br>SRRM1<br>SRRM2 | ATAD2<br>BCLAF1<br>EEF2<br>HSP90AB1<br>NPM1<br>POLA2<br>PPP6R3                        | CDK2<br>ESYT2<br>FOXK2<br>PCYT1B                                                      | IGF2BP1<br>SCRIB                                      |                                                  | IGF2BP1<br>IRS2               |                         |                    | AATF<br>EIF3F<br>ING5<br>RB1<br>SCRIB | CDK2                     | AATF<br>BCLAF1<br>FOXK2 |
|                                                        | N <sup>2</sup>                | 8                                                                 | 14                                                                                                                                                                                                                 | 43                                                                                    | 18                                                                                    | 14                                                    | 11                                               | 7                             | 8                       | 2                  | 2                                     | 8                        | 1                       |

The table is based on information from the Gene database and selected references are from the PubMed database as described more in detail in Supplementary Tables 4–6.

Abbreviations: <sup>1</sup>ER, endoplasmic reticulum; <sup>2</sup>N, number of proteins.
