# Supplementary material for: Biological characteristics of aging in human acute myeloid leukemia cells: the possible importance of aldehyde dehydrogenase, the cytoskeleton and altered transcriptional regulation
Source: publisher site journal article supplement (doi:10.18632/aging.202361), 2020-12-20
Supplement: Supplementary file [file aging-v12i24-202361-supplementary-material-SD13.pdf]

## SUPPLEMENTARY REFERENCES

1. López-Otín C, Blasco MA, Partridge L, Serrano M, Kroemer G. The hallmarks of aging. *Cell*. 2013; 153:1194–217.  
<https://doi.org/10.1016/j.cell.2013.05.039>  
PMID:[23746838](https://pubmed.ncbi.nlm.nih.gov/23746838/)
2. Lee J, Yoon SR, Choi I, Jung H. Causes and mechanisms of hematopoietic stem cell aging. *Int J Mol Sci*. 2019; 20:1272.  
<https://doi.org/10.3390/ijms20061272>  
PMID:[30871268](https://pubmed.ncbi.nlm.nih.gov/30871268/)
3. Zjablovskaja P, Florian MC. Acute myeloid leukemia: aging and epigenetics. *Cancers (Basel)*. 2019; 12:103.  
<https://doi.org/10.3390/cancers12010103>  
PMID:[31906064](https://pubmed.ncbi.nlm.nih.gov/31906064/)
4. Hu XY, Fang Q, Ma D, Jiang L, Yang Y, Sun J, Yang C, Wang JS. Aldehyde dehydrogenase 2 protects human umbilical vein endothelial cells against oxidative damage and increases endothelial nitric oxide production to reverse nitroglycerin tolerance. *Genet Mol Res*. 2016; 15.  
<https://doi.org/10.4238/gmr.15027822>  
PMID:[27323160](https://pubmed.ncbi.nlm.nih.gov/27323160/)
5. Woolthuis CM, Park CY. Hematopoietic stem/progenitor cell commitment to the megakaryocyte lineage. *Blood*. 2016; 127:1242–48.  
<https://doi.org/10.1182/blood-2015-07-607945>  
PMID:[26787736](https://pubmed.ncbi.nlm.nih.gov/26787736/)
6. Aslam MA, Alemdehy MF, Pritchard CE, Song JY, Muhaimin FI, Wijdeven RH, Huijbers IJ, Neefjes J, Jacobs H. Towards an understanding of C9orf82 protein/CAAP1 function. *PLoS One*. 2019; 14:e0210526.  
<https://doi.org/10.1371/journal.pone.0210526>  
PMID:[30629682](https://pubmed.ncbi.nlm.nih.gov/30629682/)
7. Rodríguez D, Bretones G, Quesada V, Villamor N, Arango JR, López-Guillermo A, Ramsay AJ, Baumann T, Quirós PM, Navarro A, Royo C, Martín-Subero JI, Campo E, López-Otín C. Mutations in CHD2 cause defective association with active chromatin in chronic lymphocytic leukemia. *Blood*. 2015; 126:195–202.  
<https://doi.org/10.1182/blood-2014-10-604959>  
PMID:[26031915](https://pubmed.ncbi.nlm.nih.gov/26031915/)
8. Tanna CE, Goss LB, Ludwig CG, Chen PW. Arf GAPs as regulators of the actin cytoskeleton—an update. *Int J Mol Sci*. 2019; 20:442.  
<https://doi.org/10.3390/ijms20020442>  
PMID:[30669557](https://pubmed.ncbi.nlm.nih.gov/30669557/)
9. van Gastel J, Boddaert J, Jushaj A, Premont RT, Luttrell LM, Janssens J, Martin B, Maudsley S. GIT2—a keystone in ageing and age-related disease. *Ageing Res Rev*. 2018; 43:46–63.  
<https://doi.org/10.1016/j.arr.2018.02.002>  
PMID:[29452267](https://pubmed.ncbi.nlm.nih.gov/29452267/)
10. Buschman MD, Field SJ. MYO18A: an unusual myosin. *Adv Biol Regul*. 2018; 67:84–92.  
<https://doi.org/10.1016/j.jbior.2017.09.005>  
PMID:[28942352](https://pubmed.ncbi.nlm.nih.gov/28942352/)
11. Kevenaer JT, Bianchi S, van Spronsen M, Olieric N, Lipka J, Frias CP, Mikhaylova M, Harterink M, Keijzer N, Wulf PS, Hilbert M, Kapitein LC, de Graaff E, et al. Kinesin-binding protein controls microtubule dynamics and cargo trafficking by regulating kinesin motor activity. *Curr Biol*. 2016; 26:849–61.  
<https://doi.org/10.1016/j.cub.2016.01.048>  
PMID:[26948876](https://pubmed.ncbi.nlm.nih.gov/26948876/)
12. Malaby HL, Dumas ME, Ohi R, Stumpff J. Kinesin-binding protein ensures accurate chromosome segregation by buffering KIF18A and KIF15. *J Cell Biol*. 2019; 218:1218–34.  
<https://doi.org/10.1083/jcb.201806195>  
PMID:[30709852](https://pubmed.ncbi.nlm.nih.gov/30709852/)
13. Zhang Q, Thakur C, Shi J, Sun J, Fu Y, Stemmer P, Chen F. New discoveries of mdig in the epigenetic regulation of cancers. *Semin Cancer Biol*. 2019; 57:27–35.  
<https://doi.org/10.1016/j.semcancer.2019.06.013>  
PMID:[31276784](https://pubmed.ncbi.nlm.nih.gov/31276784/)
14. Chen M, Zhang H, Shi Z, Li Y, Zhang X, Gao Z, Zhou L, Ma J, Xu Q, Guan J, Cheng Y, Jiao S, Zhou Z. The MST4-MOB4 complex disrupts the MST1-MOB1 complex in the hippo-YAP pathway and plays a pro-oncogenic role in pancreatic cancer. *J Biol Chem*. 2018; 293:14455–69.  
<https://doi.org/10.1074/jbc.RA118.003279>  
PMID:[30072378](https://pubmed.ncbi.nlm.nih.gov/30072378/)
15. Yeung YT, Guerrero-Castilla A, Cano M, Muñoz MF, Ayala A, Argüelles S. Dysregulation of the hippo pathway signaling in aging and cancer. *Pharmacol Res*. 2019; 143:151–65.  
<https://doi.org/10.1016/j.phrs.2019.03.018>  
PMID:[30910741](https://pubmed.ncbi.nlm.nih.gov/30910741/)
16. Kimura I, Konishi M, Asaki T, Furukawa N, Ukai K, Mori M, Hirasawa A, Tsujimoto G, Ohta M, Itoh N, Fujimoto M. Neudesin, an extracellular heme-binding protein, suppresses adipogenesis in 3T3-L1 cells via the MAPK cascade. *Biochem Biophys Res Commun*. 2009; 381:75–80.

- <https://doi.org/10.1016/j.bbrc.2009.02.011>  
PMID:[19351598](https://pubmed.ncbi.nlm.nih.gov/19351598/)
17. Puts GS, Leonard MK, Pamidimukkala NV, Snyder DE, Kaetzel DM. Nuclear functions of NME proteins. *Lab Invest.* 2018; 98:211–18.  
<https://doi.org/10.1038/labinvest.2017.109>  
PMID:[29058704](https://pubmed.ncbi.nlm.nih.gov/29058704/)
  18. Singh KP, Bennett JA, Casado FL, Walrath JL, Welle SL, Gasiewicz TA. Loss of aryl hydrocarbon receptor promotes gene changes associated with premature hematopoietic stem cell exhaustion and development of a myeloproliferative disorder in aging mice. *Stem Cells Dev.* 2014; 23:95–106.  
<https://doi.org/10.1089/scd.2013.0346>  
PMID:[24138668](https://pubmed.ncbi.nlm.nih.gov/24138668/)
  19. Stacpoole PW. The pyruvate dehydrogenase complex as a therapeutic target for age-related diseases. *Aging Cell.* 2012; 11:371–77.  
<https://doi.org/10.1111/j.1474-9726.2012.00805.x>  
PMID:[22321732](https://pubmed.ncbi.nlm.nih.gov/22321732/)
  20. Lillenes MS, Espeseth T, Støen M, Lundervold AJ, Frye SA, Rootwelt H, Reinvang I, Tønjum T. DNA base excision repair gene polymorphisms modulate human cognitive performance and decline during normal life span. *Mech Ageing Dev.* 2011; 132:449–58.  
<https://doi.org/10.1016/j.mad.2011.08.002>  
PMID:[21884718](https://pubmed.ncbi.nlm.nih.gov/21884718/)
  21. Zhu S, Wang Z, Zhang Z, Wang J, Li Y, Yao L, Mei Q, Zhang W. PTPLAD2 is a tumor suppressor in esophageal squamous cell carcinogenesis. *FEBS Lett.* 2014; 588:981–89.  
<https://doi.org/10.1016/j.febslet.2014.01.058>  
PMID:[24530685](https://pubmed.ncbi.nlm.nih.gov/24530685/)
  22. Camici GG, Savarese G, Akhmedov A, Lüscher TF. Molecular mechanism of endothelial and vascular aging: implications for cardiovascular disease. *Eur Heart J.* 2015; 36:3392–403.  
<https://doi.org/10.1093/eurheartj/ehv587>  
PMID:[26543043](https://pubmed.ncbi.nlm.nih.gov/26543043/)
  23. Kopetz S, Shah AN, Gallick GE. Src continues aging: current and future clinical directions. *Clin Cancer Res.* 2007; 13:7232–36.  
<https://doi.org/10.1158/1078-0432.CCR-07-1902>  
PMID:[18094400](https://pubmed.ncbi.nlm.nih.gov/18094400/)
  24. Krosil J, Mamo A, Chagraoui J, Wilhelm BT, Girard S, Louis I, Lessard J, Perreault C, Sauvageau G. A mutant allele of the Swi/Snf member BAF250a determines the pool size of fetal liver hemopoietic stem cell populations. *Blood.* 2010; 116:1678–84.  
<https://doi.org/10.1182/blood-2010-03-273862>  
PMID:[20522713](https://pubmed.ncbi.nlm.nih.gov/20522713/)
  25. Ruiz-Lafuente N, Minguela A, Muro M, Parrado A. The role of DOCK10 in the regulation of the transcriptome and aging. *Heliyon.* 2019; 5:e01391.  
<https://doi.org/10.1016/j.heliyon.2019.e01391>  
PMID:[30963125](https://pubmed.ncbi.nlm.nih.gov/30963125/)
  26. Watanabe R, Ui A, Kanno S, Ogiwara H, Nagase T, Kohno T, Yasui A. SWI/SNF factors required for cellular resistance to DNA damage include ARID1A and ARID1B and show interdependent protein stability. *Cancer Res.* 2014; 74:2465–75.  
<https://doi.org/10.1158/0008-5472.CAN-13-3608>  
PMID:[24788099](https://pubmed.ncbi.nlm.nih.gov/24788099/)
  27. Kadono M, Kanai A, Nagamachi A, Shinriki S, Kawata J, Iwato K, Kyo T, Oshima K, Yokoyama A, Kawamura T, Nagase R, Inoue D, Kitamura T, et al. Biological implications of somatic DDX41 p.R525H mutation in acute myeloid leukemia. *Exp Hematol.* 2016; 44:745–54.e4.  
<https://doi.org/10.1016/j.exphem.2016.04.017>  
PMID:[27174803](https://pubmed.ncbi.nlm.nih.gov/27174803/)
  28. Makishima H. [Sequential acquisition of mutations in myelodysplastic syndromes]. *Rinsho Ketsueki.* 2017; 58:1828–37.  
<https://doi.org/10.11406/rinketsu.58.1828>  
PMID:[28978821](https://pubmed.ncbi.nlm.nih.gov/28978821/)
  29. Geiger H, Zheng Y. Cdc42 and aging of hematopoietic stem cells. *Curr Opin Hematol.* 2013; 20:295–300.  
<https://doi.org/10.1097/MOH.0b013e3283615aba>  
PMID:[23615056](https://pubmed.ncbi.nlm.nih.gov/23615056/)
  30. Hao YH, Doyle JM, Ramanathan S, Gomez TS, Jia D, Xu M, Chen ZJ, Billadeau DD, Rosen MK, Potts PR. Regulation of WASH-dependent actin polymerization and protein trafficking by ubiquitination. *Cell.* 2013; 152:1051–64.  
<https://doi.org/10.1016/j.cell.2013.01.051>  
PMID:[23452853](https://pubmed.ncbi.nlm.nih.gov/23452853/)
  31. Singh J, Kumar S, Krishna CV, Rattan S. Aging-associated oxidative stress leads to decrease in IAS tone via RhoA/ROCK downregulation. *Am J Physiol Gastrointest Liver Physiol.* 2014; 306:G983–91.  
<https://doi.org/10.1152/ajpgi.00087.2014>  
PMID:[24742984](https://pubmed.ncbi.nlm.nih.gov/24742984/)
  32. Tapia PC. RhoA, rho kinase, JAK2, and STAT3 may be the intracellular determinants of longevity implicated in the progeric influence of obesity: insulin, IGF-1, and leptin may all conspire to promote stem cell exhaustion. *Med Hypotheses.* 2006; 66:570–76.  
<https://doi.org/10.1016/j.mehy.2005.09.008>  
PMID:[16226846](https://pubmed.ncbi.nlm.nih.gov/16226846/)
  33. Florian MC, Dörr K, Niebel A, Daria D, Schrezenmeier H, Rojewski M, Filippi MD, Hasenberg A, Gunzer M, Scharffetter-Kochanek K, Zheng Y, Geiger H. Cdc42

- activity regulates hematopoietic stem cell aging and rejuvenation. *Cell Stem Cell*. 2012; 10:520–30.  
<https://doi.org/10.1016/j.stem.2012.04.007>  
 PMID:[22560076](https://pubmed.ncbi.nlm.nih.gov/22560076/)
34. Florian MC, Klose M, Sacma M, Jablanovic J, Knudson L, Nattamai KJ, Marka G, Vollmer A, Soller K, Sakk V, Cabezas-Wallscheid N, Zheng Y, Mulaw MA, et al. Aging alters the epigenetic asymmetry of HSC division. *PLoS Biol*. 2018; 16:e2003389.  
<https://doi.org/10.1371/journal.pbio.2003389>  
 PMID:[30235201](https://pubmed.ncbi.nlm.nih.gov/30235201/)
  35. Ramalho-Oliveira R, Oliveira-Vieira B, Viola JP. IRF2BP2: a new player in the regulation of cell homeostasis. *J Leukoc Biol*. 2019; 106:717–23.  
<https://doi.org/10.1002/JLB.MR1218-507R>  
 PMID:[31022319](https://pubmed.ncbi.nlm.nih.gov/31022319/)
  36. Brauchle M, Yao Z, Arora R, Thigale S, Clay I, Inverardi B, Fletcher J, Taslimi P, Acker MG, Gerrits B, Voshol J, Bauer A, Schübeler D, et al. Protein complex interactor analysis and differential activity of KDM3 subfamily members towards H3K9 methylation. *PLoS One*. 2013; 8:e60549.  
<https://doi.org/10.1371/journal.pone.0060549>  
 PMID:[23593242](https://pubmed.ncbi.nlm.nih.gov/23593242/)
  37. Li J, Yu B, Deng P, Cheng Y, Yu Y, Kevork K, Ramadoss S, Ding X, Li X, Wang CY. Author correction: KDM3 epigenetically controls tumorigenic potentials of human colorectal cancer stem cells through Wnt/ $\beta$ -catenin signalling. *Nat Commun*. 2019; 10:5020.  
<https://doi.org/10.1038/s41467-019-12878-z>  
 PMID:[31685815](https://pubmed.ncbi.nlm.nih.gov/31685815/)
  38. Lai WF, Wong WT. Roles of the actin cytoskeleton in aging and age-associated diseases. *Ageing Res Rev*. 2020; 58:101021.  
<https://doi.org/10.1016/j.arr.2020.101021>  
 PMID:[31968269](https://pubmed.ncbi.nlm.nih.gov/31968269/)
  39. Martin-Rendon E, Hale SJ, Ryan D, Baban D, Forde SP, Roubelakis M, Sweeney D, Moukayed M, Harris AL, Davies K, Watt SM. Transcriptional profiling of human cord blood CD133+ and cultured bone marrow mesenchymal stem cells in response to hypoxia. *Stem Cells*. 2007; 25:1003–12.  
<https://doi.org/10.1634/stemcells.2006-0398>  
 PMID:[17185612](https://pubmed.ncbi.nlm.nih.gov/17185612/)
  40. Bocquet N, Bizard AH, Abdulrahman W, Larsen NB, Faty M, Cavadini S, Bunker RD, Kowalczykowski SC, Cejka P, Hickson ID, Thomä NH. Structural and mechanistic insight into holliday-junction dissolution by topoisomerase III $\alpha$  and RMI1. *Nat Struct Mol Biol*. 2014; 21:261–68.  
<https://doi.org/10.1038/nsmb.2775>  
 PMID:[24509834](https://pubmed.ncbi.nlm.nih.gov/24509834/)
  41. Bounaix Morand du Puch C, Barbier E, Kraut A, Couté Y, Fuchs J, Buhot A, Livache T, Sève M, Favier A, Douki T, Gasparutto D, Sauvaigo S, Breton J. TOX4 and its binding partners recognize DNA adducts generated by platinum anticancer drugs. *Arch Biochem Biophys*. 2011; 507:296–303.  
<https://doi.org/10.1016/j.abb.2010.12.021>  
 PMID:[21184731](https://pubmed.ncbi.nlm.nih.gov/21184731/)
  42. Vanheer L, Song J, De Geest N, Janiszewski A, Talon I, Provenzano C, Oh T, Chappell J, Pasque V. Tox4 modulates cell fate reprogramming. *J Cell Sci*. 2019; 132:jcs232223.  
<https://doi.org/10.1242/jcs.232223> PMID:[31519808](https://pubmed.ncbi.nlm.nih.gov/31519808/)
  43. Barbosa K, Li S, Adams PD, Deshpande AJ. The role of TP53 in acute myeloid leukemia: challenges and opportunities. *Genes Chromosomes Cancer*. 2019; 58:875–88.  
<https://doi.org/10.1002/gcc.22796> PMID:[31393631](https://pubmed.ncbi.nlm.nih.gov/31393631/)
  44. Ou HL, Schumacher B. DNA damage responses and p53 in the aging process. *Blood*. 2018; 131:488–95.  
<https://doi.org/10.1182/blood-2017-07-746396>  
 PMID:[29141944](https://pubmed.ncbi.nlm.nih.gov/29141944/)
  45. Wu D, Prives C. Relevance of the p53-MDM2 axis to aging. *Cell Death Differ*. 2018; 25:169–79.  
<https://doi.org/10.1038/cdd.2017.187> PMID:[29192902](https://pubmed.ncbi.nlm.nih.gov/29192902/)
  46. Chen J, Wang A, Chen Q. SirT3 and p53 deacetylation in aging and cancer. *J Cell Physiol*. 2017; 232:2308–11.  
<https://doi.org/10.1002/jcp.25669> PMID:[27791271](https://pubmed.ncbi.nlm.nih.gov/27791271/)
  47. Rufini A, Tucci P, Celardo I, Melino G. Senescence and aging: the critical roles of p53. *Oncogene*. 2013; 32:5129–43.  
<https://doi.org/10.1038/onc.2012.640> PMID:[23416979](https://pubmed.ncbi.nlm.nih.gov/23416979/)
  48. Kaiser RW, Ignarski M, Van Nostrand EL, Frese CK, Jain M, Cukoski S, Heinen H, Schaechter M, Seufert L, Bunte K, Frommolt P, Keller P, Helm M, et al. A protein-RNA interaction atlas of the ribosome biogenesis factor AATF. *Sci Rep*. 2019; 9:11071.  
<https://doi.org/10.1038/s41598-019-47552-3>  
 PMID:[31363146](https://pubmed.ncbi.nlm.nih.gov/31363146/)
  49. Koo SJ, Fernández-Montalván AE, Badock V, Ott CJ, Holton SJ, von Ahsen O, Toedling J, Vittori S, Bradner JE, Gorjánác M. ATAD2 is an epigenetic reader of newly synthesized histone marks during DNA replication. *Oncotarget*. 2016; 7:70323–35.  
<https://doi.org/10.18632/oncotarget.11855>  
 PMID:[27612420](https://pubmed.ncbi.nlm.nih.gov/27612420/)
  50. Morozumi Y, Boussouar F, Tan M, Chaikwad A, Jamshidikia M, Colak G, He H, Nie L, Petosa C, de Dieuleveult M, Curtet S, Vitte AL, Rabatel C, et al. Atad2 is a generalist facilitator of chromatin dynamics in embryonic stem cells. *J Mol Cell Biol*. 2016; 8:349–62.  
<https://doi.org/10.1093/jmcb/mjv060> PMID:[26459632](https://pubmed.ncbi.nlm.nih.gov/26459632/)

51. Shao AW, Sun H, Geng Y, Peng Q, Wang P, Chen J, Xiong T, Cao R, Tang J. Bclaf1 is an important NF- $\kappa$ B signaling transducer and C/EBP $\beta$  regulator in DNA damage-induced senescence. *Cell Death Differ.* 2016; 23:865–75.  
<https://doi.org/10.1038/cdd.2015.150>  
PMID:26794446
52. Chae U, Park JW, Lee SR, Lee HJ, Lee HS, Lee DS. Reactive oxygen species-mediated senescence is accelerated by inhibiting Cdk2 in *Idh2*-deficient conditions. *Aging (Albany NY).* 2019; 11:7242–56.  
<https://doi.org/10.18632/aging.102259>  
PMID:31503005
53. Heshmati Y, Türköz G, Harisankar A, Kharazi S, Boström J, Dolatabadi EK, Krstic A, Chang D, Månsson R, Altun M, Qian H, Walfridsson J. The chromatin-remodeling factor CHD4 is required for maintenance of childhood acute myeloid leukemia. *Haematologica.* 2018; 103:1169–81.  
<https://doi.org/10.3324/haematol.2017.183970>  
PMID:29599201
54. Sperlazza J, Rahmani M, Beckta J, Aust M, Hawkins E, Wang SZ, Zu Zhu S, Podder S, Dumur C, Archer K, Grant S, Ginder GD. Depletion of the chromatin remodeler CHD4 sensitizes AML blasts to genotoxic agents and reduces tumor formation. *Blood.* 2015; 126:1462–72.  
<https://doi.org/10.1182/blood-2015-03-631606>  
PMID:26265695
55. Ooga M, Funaya S, Hashioka Y, Fujii W, Naito K, Suzuki MG, Aoki F. Chd9 mediates highly loosened chromatin structure in growing mouse oocytes. *Biochem Biophys Res Commun.* 2018; 500:583–88.  
<https://doi.org/10.1016/j.bbrc.2018.04.105>  
PMID:29665362
56. Unlu I, Lu Y, Wang X. The cyclic phosphodiesterase CNP and RNA cyclase RtcA fine-tune noncanonical XBP1 splicing during ER stress. *J Biol Chem.* 2018; 293:19365–76.  
<https://doi.org/10.1074/jbc.RA118.004872>  
PMID:30355738
57. Xie J, de Souza Alves V, von der Haar T, O’Keefe L, Lenchine RV, Jensen KB, Liu R, Coldwell MJ, Wang X, Proud CG. Regulation of the elongation phase of protein synthesis enhances translation accuracy and modulates lifespan. *Curr Biol.* 2019; 29:737–49.e5.  
<https://doi.org/10.1016/j.cub.2019.01.029>  
PMID:30773367
58. Wen F, Zhou R, Shen A, Choi A, Uribe D, Shi J. The tumor suppressive role of eIF3f and its function in translation inhibition and rRNA degradation. *PLoS One.* 2012; 7:e34194.  
<https://doi.org/10.1371/journal.pone.0034194>  
PMID:22457825
59. Schauder CM, Wu X, Saheki Y, Narayanaswamy P, Torta F, Wenk MR, De Camilli P, Reinisch KM. Structure of a lipid-bound extended synaptotagmin indicates a role in lipid transfer. *Nature.* 2014; 510:552–55.  
<https://doi.org/10.1038/nature13269> PMID:24847877
60. Yang Q, Wang J, Zhong P, Mou T, Hua H, Liu P, Xie F. The clinical prognostic value of lncRNA FAM83H-AS1 in cancer patients: a meta-analysis. *Cancer Cell Int.* 2020; 20:72.  
<https://doi.org/10.1186/s12935-020-1148-8>  
PMID:32165862
61. Lin MF, Yang YF, Peng ZP, Zhang MF, Liang JY, Chen W, Liu XH, Zheng YL. FOXK2, regulated by miR-1271-5p, promotes cell growth and indicates unfavorable prognosis in hepatocellular carcinoma. *Int J Biochem Cell Biol.* 2017; 88:155–61.  
<https://doi.org/10.1016/j.biocel.2017.05.019>  
PMID:28506857
62. Liu X, Wei X, Niu W, Wang D, Wang B, Zhuang H. Downregulation of FOXK2 is associated with poor prognosis in patients with gastric cancer. *Mol Med Rep.* 2018; 18:4356–64.  
<https://doi.org/10.3892/mmr.2018.9466>  
PMID:30221666
63. Nestal de Moraes G, Carneiro LD, Maia RC, Lam EW, Sharrocks AD. FOXK2 transcription factor and its emerging roles in cancer. *Cancers (Basel).* 2019; 11:393.  
<https://doi.org/10.3390/cancers11030393>  
PMID:30897782
64. Balboula AZ, Nguyen AL, Gentilello AS, Quartuccio SM, Drutovic D, Solc P, Schindler K. Haspin kinase regulates microtubule-organizing center clustering and stability through aurora kinase C in mouse oocytes. *J Cell Sci.* 2016; 129:3648–60.  
<https://doi.org/10.1242/jcs.189340> PMID:27562071
65. Liang C, Chen Q, Yi Q, Zhang M, Yan H, Zhang B, Zhou L, Zhang Z, Qi F, Ye S, Wang F. A kinase-dependent role for haspin in antagonizing wapl and protecting mitotic centromere cohesion. *EMBO Rep.* 2018; 19:43–56.  
<https://doi.org/10.15252/embr.201744737>  
PMID:29138236
66. Maiolica A, de Medina-Redondo M, Schoof EM, Chaikuad A, Villa F, Gatti M, Jeganathan S, Lou HJ, Novy K, Hauri S, Toprak UH, Herzog F, Meraldi P, et al. Modulation of the chromatin phosphoproteome by the haspin protein kinase. *Mol Cell Proteomics.* 2014; 13:1724–40.  
<https://doi.org/10.1074/mcp.M113.034819>  
PMID:24732914
67. Short B. GTSE1 leads cancer cells into CIN. *J Cell Biol.* 2016; 215:593.

- <https://doi.org/10.1083/jcb.2155if>  
PMID:27888203
68. Thalappilly S, Feng X, Pastyryeva S, Suzuki K, Muruve D, Larocque D, Richard S, Truss M, von Deimling A, Riabowol K, Tallen G. The p53 tumor suppressor is stabilized by inhibitor of growth 1 (ING1) by blocking polyubiquitination. *PLoS One*. 2011; 6:e21065.  
<https://doi.org/10.1371/journal.pone.0021065>  
PMID:21731648
69. Schmidt K, Zhang Q, Tasdogan A, Petzold A, Dahl A, Arneth BM, Slany R, Fehling HJ, Kranz A, Stewart AF, Anastassiadis K. The H3K4 methyltransferase Setd1b is essential for hematopoietic stem and progenitor cell homeostasis in mice. *Elife*. 2018; 7:e27157.  
<https://doi.org/10.7554/eLife.27157>  
PMID:29916805
70. Cornell RB, Ridgway ND. CTP:phosphocholine cytidyltransferase: function, regulation, and structure of an amphitropic enzyme required for membrane biogenesis. *Prog Lipid Res*. 2015; 59:147–71.  
<https://doi.org/10.1016/j.plipres.2015.07.001>  
PMID:26165797
71. Ganduri S, Lue NF. STN1-POLA2 interaction provides a basis for primase-pol  $\alpha$  stimulation by human STN1. *Nucleic Acids Res*. 2017; 45:9455–66.  
<https://doi.org/10.1093/nar/gkx621>  
PMID:28934486
72. Szlavicz E, Szabo K, Groma G, Bata-Csorgo Z, Pagani F, Kemeny L, Szell M. Splicing factors differentially expressed in psoriasis alter mRNA maturation of disease-associated EDA+ fibronectin. *Mol Cell Biochem*. 2017; 436:189–99.  
<https://doi.org/10.1007/s11010-017-3090-1>  
PMID:28589370
73. Qiu R, Zhang J, Xiang X. The splicing-factor Prp40 affects dynein-dynactin function in *Aspergillus nidulans*. *Mol Biol Cell*. 2020; 31:1289–301.  
<https://doi.org/10.1091/mbc.E20-03-0166>  
PMID:32267207
74. Ni Z, Xu C, Guo X, Hunter GO, Kuznetsova OV, Tempel W, Marcon E, Zhong G, Guo H, Kuo WW, Li J, Young P, Olsen JB, et al. RPRD1A and RPRD1B are human RNA polymerase II C-terminal domain scaffolds for Ser5 dephosphorylation. *Nat Struct Mol Biol*. 2014; 21:686–95.  
<https://doi.org/10.1038/nsmb.2853> PMID:24997600
75. Alsarraj J, Faraji F, Geiger TR, Mattaini KR, Williams M, Wu J, Ha NH, Merlino T, Walker RC, Bosley AD, Xiao Z, Andresson T, Esposito D, et al. BRD4 short isoform interacts with RRP1B, SIPA1 and components of the LINC complex at the inner face of the nuclear membrane. *PLoS One*. 2013; 8:e80746.  
<https://doi.org/10.1371/journal.pone.0080746>  
PMID:24260471
76. Lee M, Dworkin AM, Gildea D, Trivedi NS, Moorhead GB, Crawford NP, and NISC Comparative Sequencing Program. RRP1B is a metastasis modifier that regulates the expression of alternative mRNA isoforms through interactions with SRSF1. *Oncogene*. 2014; 33:1818–27.  
<https://doi.org/10.1038/onc.2013.133> PMID:23604122
77. Maiese K. Disease onset and aging in the world of circular RNAs. *J Transl Sci*. 2016; 2:327–29.  
<https://doi.org/10.15761/jts.1000158> PMID:27642518
78. G erus M, Bonnart C, Caizergues-Ferrer M, Henry Y, Henras AK. Evolutionarily conserved function of RRP36 in early cleavages of the pre-rRNA and production of the 40S ribosomal subunit. *Mol Cell Biol*. 2010; 30:1130–44.  
<https://doi.org/10.1128/MCB.00999-09>  
PMID:20038530
79. Dash BP, Schn oder TM, Kathner C, Mohr J, Weinert S, Herzog C, Godavarthy PS, Zanetti C, Perner F, Braundullaeus R, Hartleben B, Huber TB, Walz G, et al. Diverging impact of cell fate determinants scrib and Lgl1 on adhesion and migration of hematopoietic stem cells. *J Cancer Res Clin Oncol*. 2018; 144:1933–44.  
<https://doi.org/10.1007/s00432-018-2724-3>  
PMID:30083817
80. Chwalenia K, Qin F, Singh S, Li H. A cell-based splicing reporter system to identify regulators of cis-splicing between adjacent genes. *Nucleic Acids Res*. 2019; 47:e24.  
<https://doi.org/10.1093/nar/gky1288>  
PMID:30590765
81. Zanini IM, Sonesson C, Lorenzi LE, Azzalin CM. Human cactin interacts with DHX8 and SRRM2 to assure efficient pre-mRNA splicing and sister chromatid cohesion. *J Cell Sci*. 2017; 130:767–78.  
<https://doi.org/10.1242/jcs.194068>  
PMID:28062851
82. Bhullar J, Sollars VE. YBX1 expression and function in early hematopoiesis and leukemic cells. *Immunogenetics*. 2011; 63:337–50.  
<https://doi.org/10.1007/s00251-011-0517-9>  
PMID:21369783
83. Knuckles P, Lence T, Haussmann IU, Jacob D, Kreim N, Carl SH, Masiello I, Hares T, Villase nor R, Hess D, Andrade-Navarro MA, Biggiogera M, Helm M, et al. Zc3h13/flacc is required for adenosine methylation by bridging the mRNA-binding factor Rbm15/Spenito to the m<sup>6</sup>A machinery component Wtap/FI(2)d. *Genes Dev*. 2018; 32:415–29.  
<https://doi.org/10.1101/gad.309146.117>  
PMID:29535189

84. Wen J, Lv R, Ma H, Shen H, He C, Wang J, Jiao F, Liu H, Yang P, Tan L, Lan F, Shi YG, He C, et al. Zc3h13 regulates nuclear RNA m<sup>6</sup>A methylation and mouse embryonic stem cell self-renewal. *Mol Cell*. 2018; 69:1028–38.e6.

<https://doi.org/10.1016/j.molcel.2018.02.015>  
PMID:[29547716](https://pubmed.ncbi.nlm.nih.gov/29547716/)
